# Supplementary material for: Oxidative functionalization of yndiamides catalyzed by gold(i) or Brønsted acid systems: computational study of mechanism, selectivity patterns, and effects of substituents
Source: Royal Society of Chemistry journal article supplement (doi:10.1039/d3cy01231j), 2024-01-01
Supplement: d3cy01231j1.pdf [file d3cy01231j1.pdf]

## Electronic Supplementary Information

### **Oxidative functionalization of yndiamides catalyzed by gold(I) or Brønsted acid systems: Computational study of mechanism, selectivity patterns, and effects of substituents**

*Guowei Yan<sup>a</sup>, Ji Ma<sup>a</sup>, Simeng Qi<sup>a</sup>, Alexander M. Kirillov<sup>b</sup>, Lizi Yang<sup>c</sup> and Ran Fang<sup>\*a</sup>*

<sup>a</sup> Key Laboratory of Chemical Additives for China National Light Industry, College of Chemistry and Chemical Engineering, Shaanxi University of Science and Technology, Xi'an 710021, P. R. China.

<sup>b</sup> Centro de Química Estrutural, Institute of Molecular Sciences, Departamento de Engenharia Química, Instituto Superior Técnico, Universidade de Lisboa, Av. Rovisco Pais, 1049-001, Lisbon, Portugal.

<sup>c</sup> College of Chemistry and Chemical Engineering, Lanzhou University, Lanzhou 730000, P. R. China.

\*Corresponding author.

E-mail address:

fangr@lzu.edu.cn (R. Fang).

## Table of contents

|                                                                                                                                                         |     |
|---------------------------------------------------------------------------------------------------------------------------------------------------------|-----|
| Figure S1.....                                                                                                                                          | S3  |
| Figure S2.....                                                                                                                                          | S3  |
| Figure S3.....                                                                                                                                          | S4  |
| Figure S4.....                                                                                                                                          | S4  |
| Figure S5.....                                                                                                                                          | S5  |
| Figure S6.....                                                                                                                                          | S5  |
| Table S1.. ..                                                                                                                                           | S6  |
| Table S2. ....                                                                                                                                          | S6  |
| Table S3. ....                                                                                                                                          | S6  |
| Table S4. ....                                                                                                                                          | S7  |
| Figure S7. Calculated NBO charges (in e), 3D geometries and NCI analyses for key intermediates in the series A.....                                     | S8  |
| Figure S8. Scanning diagram of the C-N bond in the Re3 (N) attack mode. ....                                                                            | S9  |
| Figure S9. Scanning diagram of the C-O bond in the B-TSg1. ....                                                                                         | S9  |
| Figure S10. Different conformers and configurations of the transition states for the C-X (X=O, C, N) bond formation (series A). ....                    | S10 |
| Figure S11. Different conformers and configurations of the transition states for the C-O bond formation (series C). ....                                | S10 |
| Figure S12. Different conformers and configurations of the transition states for the C-O bond formation (series D). Energy values are in kcal/mol. .... | S11 |
| Figure S13. Different conformers and configurations of the transition states for the C-O bond formation (series E). ....                                | S11 |
| Figure S14. Different conformers and configurations of the transition states for the C-O bond formation (series F).....                                 | S12 |
| Figure S15. Different conformers and configurations of the transition states for the C-O bond formation (series G).....                                 | S12 |
| Figure S16. Different conformers and configurations of the transition states for the C-X (X=O, C, N) bond formation (series B).....                     | S13 |
| Figure S17. Optimized 3D geometries of series A.....                                                                                                    | S14 |
| Figure S18. Calculated NPA charges (in e) for Re4-Re8. ....                                                                                             | S15 |
| Cartesian coordinates of the stationary points .....                                                                                                    | S16 |

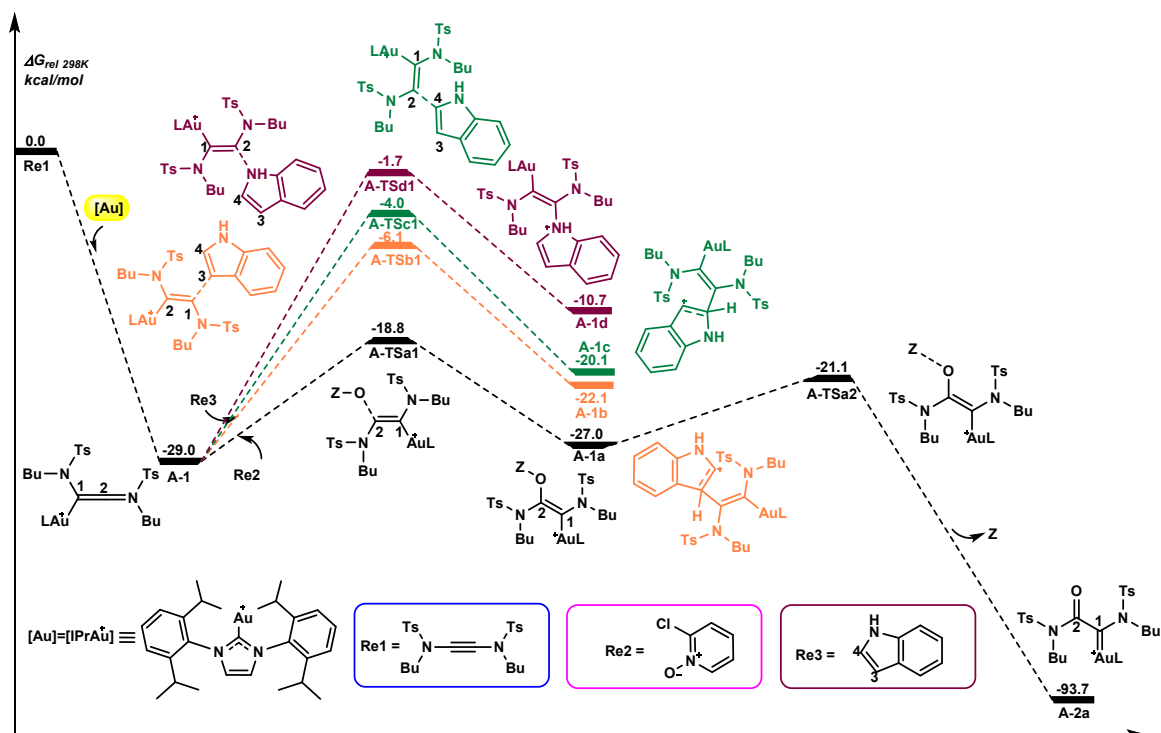

Figure S1 Full energy curves calculated for series A at the M06-D3/SMD/6-311++G(d, p) //B3LYP/6-31G(d, p) level. Relative energies are in kcal/mol.

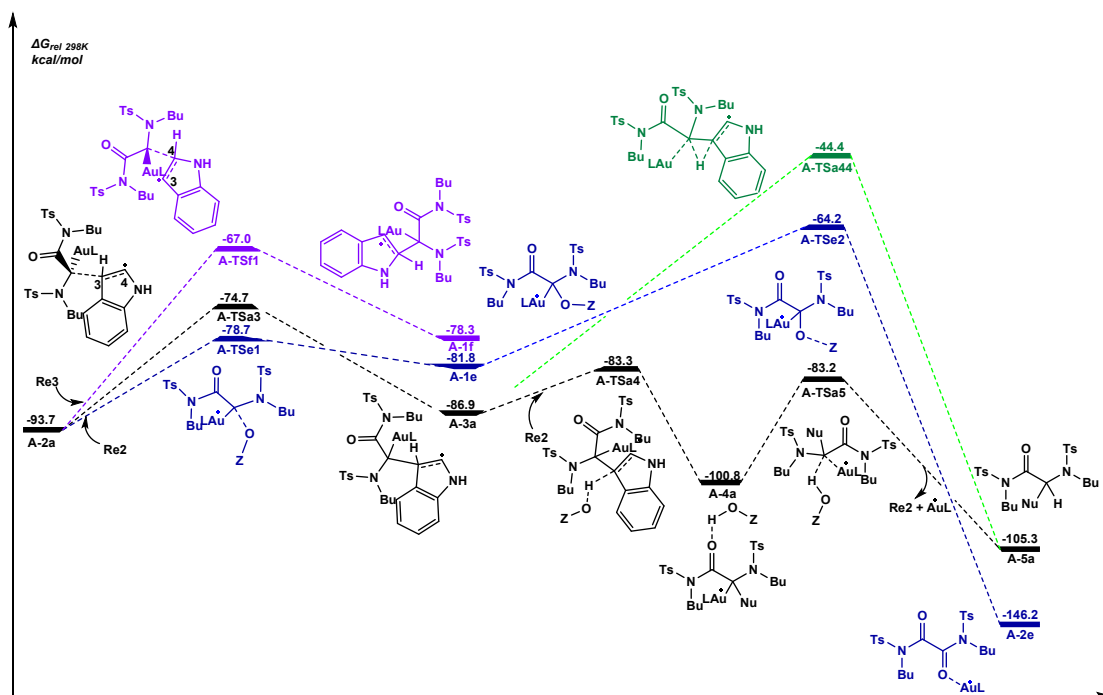

Figure S2 Full energy curves calculated for series A (continuation) at the M06-D3/SMD/6-311++G(d, p) //B3LYP/6-31G(d, p) level. Relative energies are in kcal/mol.



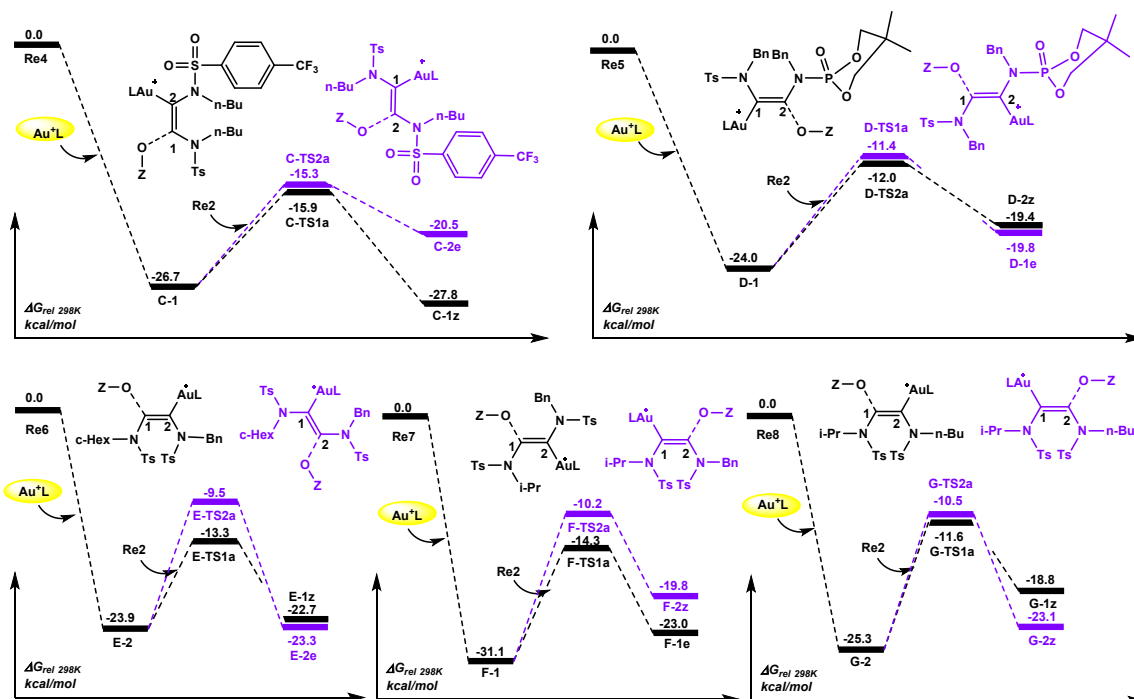

Figure S5. Energy profiles of the first steps of gold-catalyzed oxidative functionalization of asymmetrical yndiamides (Series C–G) at the M06-D3/SMD/6-311++G(d, p) //B3LYP/6-31G(d, p) level. Relative energies are expressed in kcal/mol.

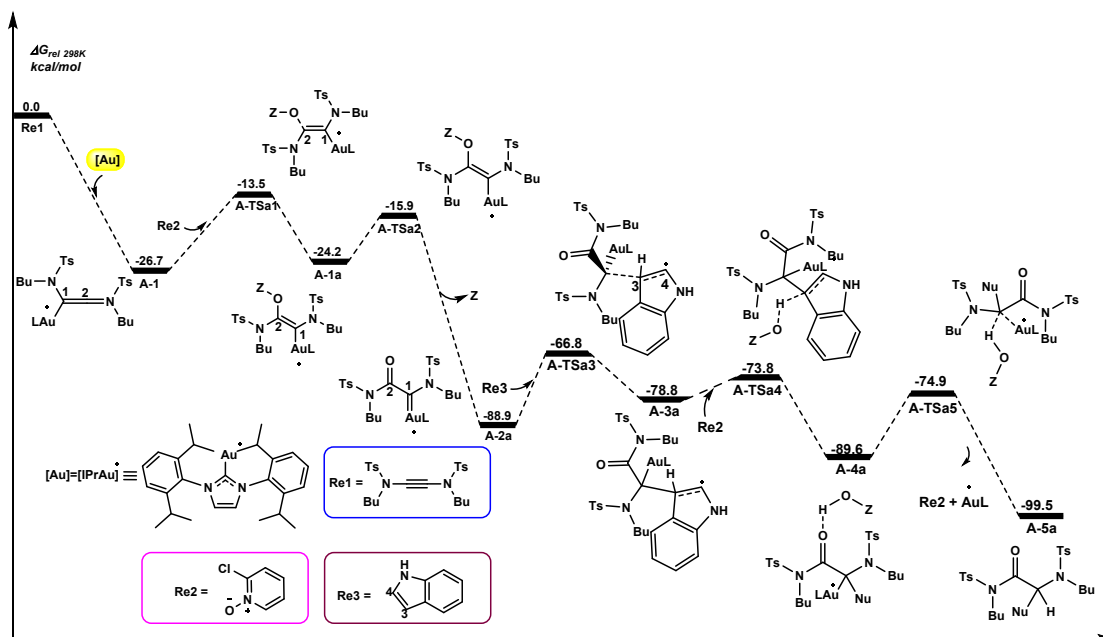

Figure S6 Full energy curves calculated for series A at the M06-D3/SMD/def2-TZVP//B3LYP/def2-SVP level. Relative energies are in kcal/mol.

**Table S1. Energy calculations for key transition states in the series A at two levels. Relative energies are in kcal/mol.**

|        | <i>M06-D3/6-311++G(d, p) //B3LYP/6-31G(d, p)</i> | <i>M06-D3/6-311++G(d, p) //M06/6-31G(d, p)</i> | <i>M06-D3/6-311++G(d, p)//B3LYP-D3/6-31G(d, p)</i> |
|--------|--------------------------------------------------|------------------------------------------------|----------------------------------------------------|
| A-TSd1 | 27.3                                             | 27.5                                           | 26.9                                               |
| A-TSc1 | 25                                               | 26.7                                           | 24.2                                               |
| A-TSb1 | 22.8                                             | 23.6                                           | 22.1                                               |
| A-TSa1 | 10.1                                             | 12.8                                           | 9.9                                                |
| A-TSe2 | 29.5                                             | 29.7                                           | 28.2                                               |
| A-TSf1 | 26.7                                             | 24.1                                           | 24.1                                               |
| A-TSa3 | 19                                               | 19.6                                           | 18.9                                               |
| A-TSe1 | 15                                               | 16.2                                           | 14.9                                               |

**Table S2. Energy comparison with and without the dispersion feature added for key transition states in the series A. Relative energies are in kcal/mol.**

|        | <i>M06-D3/SMD/6-311++G(d, p) //B3LYP/6-31G(d, p)</i> | <i>M06-D3/SMD/6-311++G(d, p) //B3LYP/6-31+G(d)</i> |
|--------|------------------------------------------------------|----------------------------------------------------|
| A-TSd1 | 17.2                                                 | 16.1                                               |
| A-TSc1 | 14.9                                                 | 14.6                                               |
| A-TSb1 | 12.7                                                 | 11.8                                               |
| A-TSa1 | 0.0                                                  | 0.0                                                |
| A-TSe2 | 14.5                                                 | 16.2                                               |
| A-TSf1 | 11.7                                                 | 18.9                                               |
| A-TSa3 | 4.0                                                  | 11.3                                               |
| A-TSe1 | 0.0                                                  | 0.0                                                |

**Table S3. Considering solvent effects at the optimisation stage in the series A. Relative energies are in kcal/mol.**

|        | <i>M06-D3/SMD/6-311++G(d, p) //B3LYP/6-31G(d, p)</i> | <i>M06-D3/SMD/def2-TZVP //B3LYP-D3/SMD/def2-SVP</i> |
|--------|------------------------------------------------------|-----------------------------------------------------|
| A-TSa1 | 0.0                                                  | 0.0                                                 |
| A-TSb1 | 12.7                                                 | 14.4                                                |
| A-TSc1 | 14.9                                                 | 18.9                                                |
| A-TSd1 | 17.2                                                 | 16.5                                                |
| A-TSe1 | 0.0                                                  | 0.0                                                 |
| A-TSa3 | 4.0                                                  | 3.2                                                 |
| A-TSf1 | 11.7                                                 | 13.0                                                |
| A-TSe2 | 14.5                                                 | 13.8                                                |

**Table S4. Considering solvent effects at the optimisation stage in the series B. Relative energies are in kcal/mol.**

|        | <i>M06-D3/SMD/6-311++G(d, p)</i><br><i>//B3LYP/6-31G(d, p)</i> | <i>M06-D3/SMD/def2-TZVP //</i><br><i>B3LYP-D3/SMD/def2-SVP</i> |
|--------|----------------------------------------------------------------|----------------------------------------------------------------|
| B-TSa1 | 0.0                                                            | 0.0                                                            |
| B-TSb1 | 7.4                                                            | 7.1                                                            |
| B-TSc1 | 6.6                                                            | 10.6                                                           |
| B-TSd1 | 11.2                                                           | 12.1                                                           |
| B-TSa3 | 0.0                                                            | 0.0                                                            |
| B-TSe1 | 7.7                                                            | 4.1                                                            |
| B-Tsg2 | 13.3                                                           | 22.1                                                           |
| B-TSf1 | 16.0                                                           | 15.6                                                           |

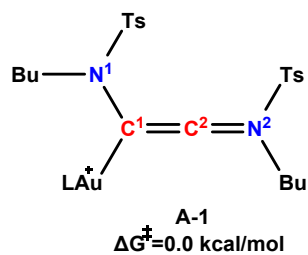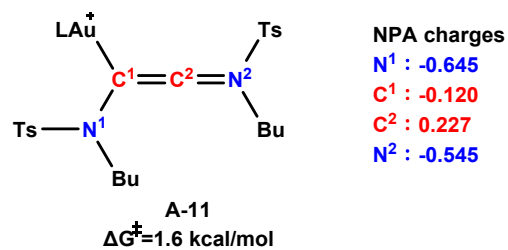

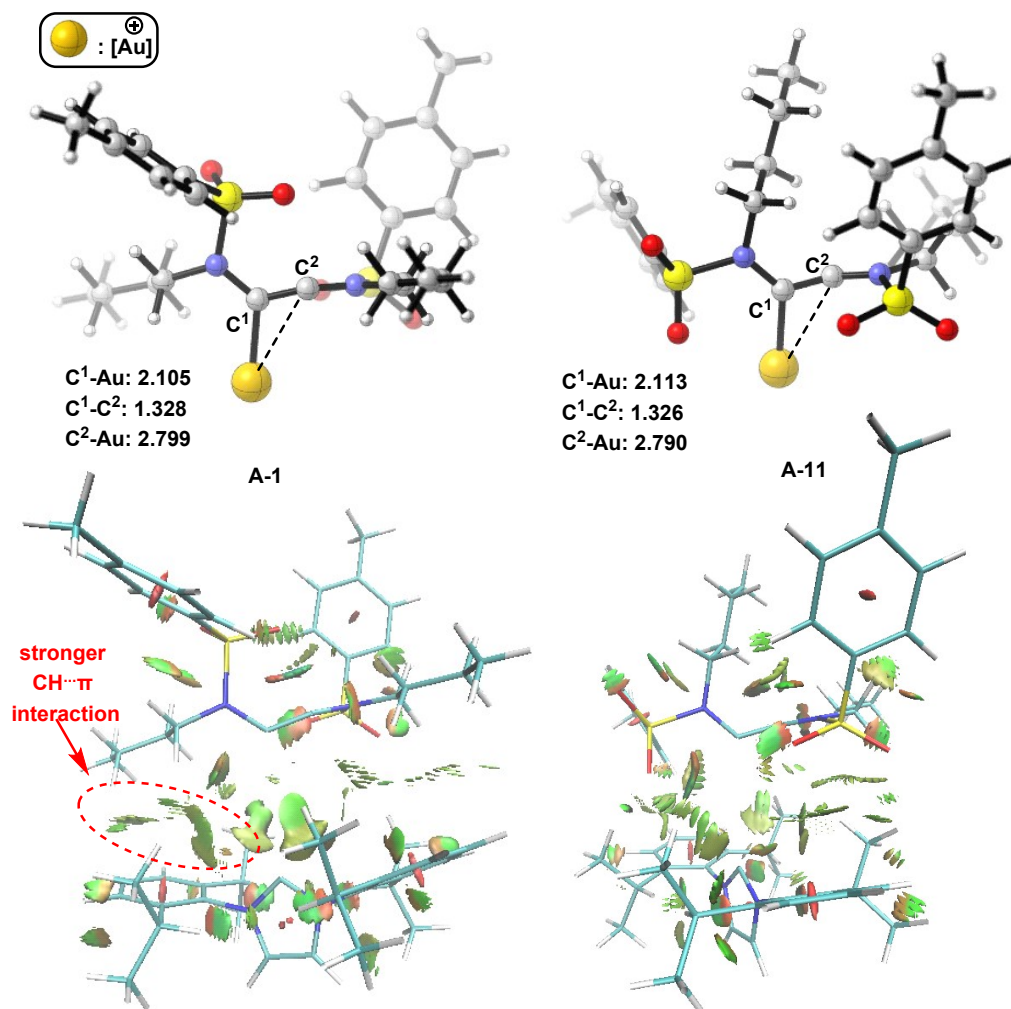

Figure S7. Calculated NBO charges (in e), 3D geometries and NCI analyses for key intermediates in the series A. Blue, green, and red surfaces represent the strong interaction, weak interaction, and steric effect, respectively.



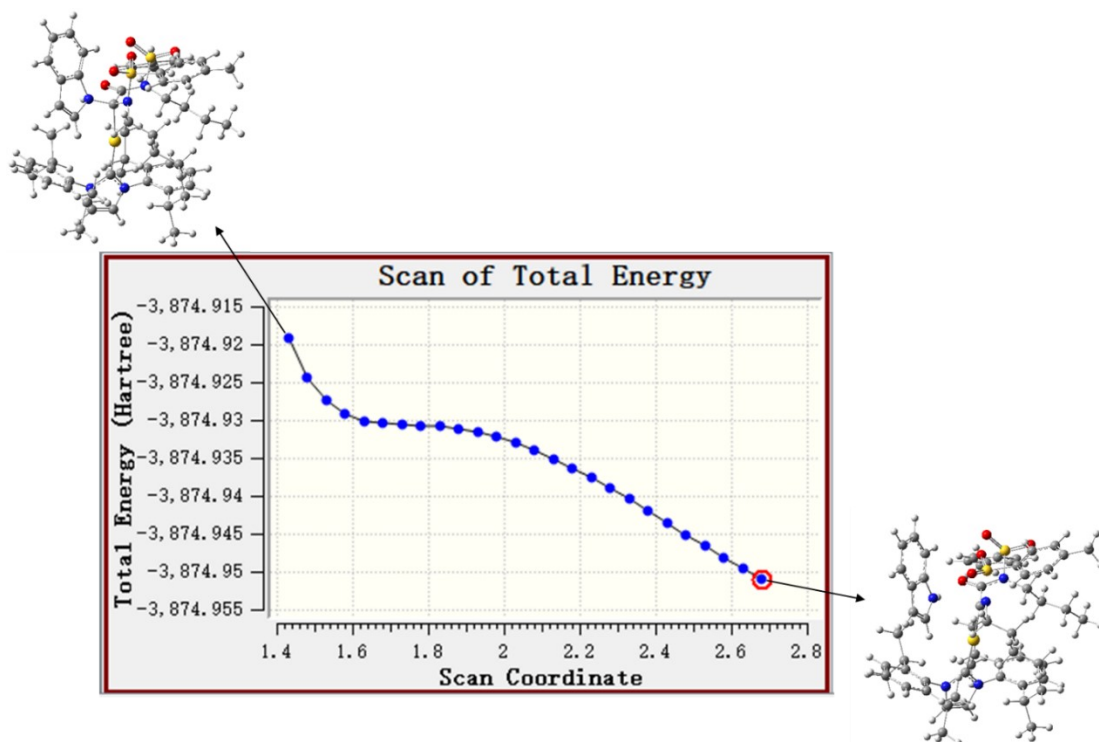

Figure S8. Scanning diagram of the C-N bond in the Re3 (N) attack mode.

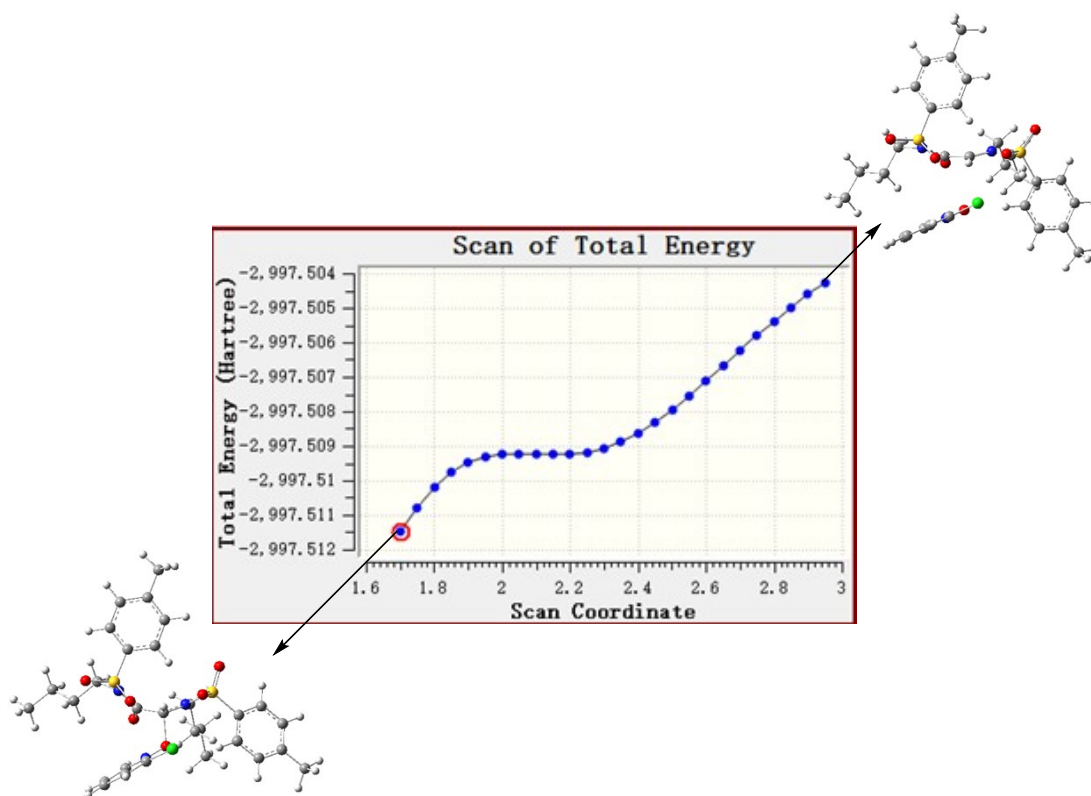

Figure S9. Scanning diagram of the C-O bond in the B-TSg1 at the B3LYP-D3/def2-SVP level. Although B-TSg1 is a no barrier process, B-TSg2 requires an extremely high barrier limiting the reaction pathway.

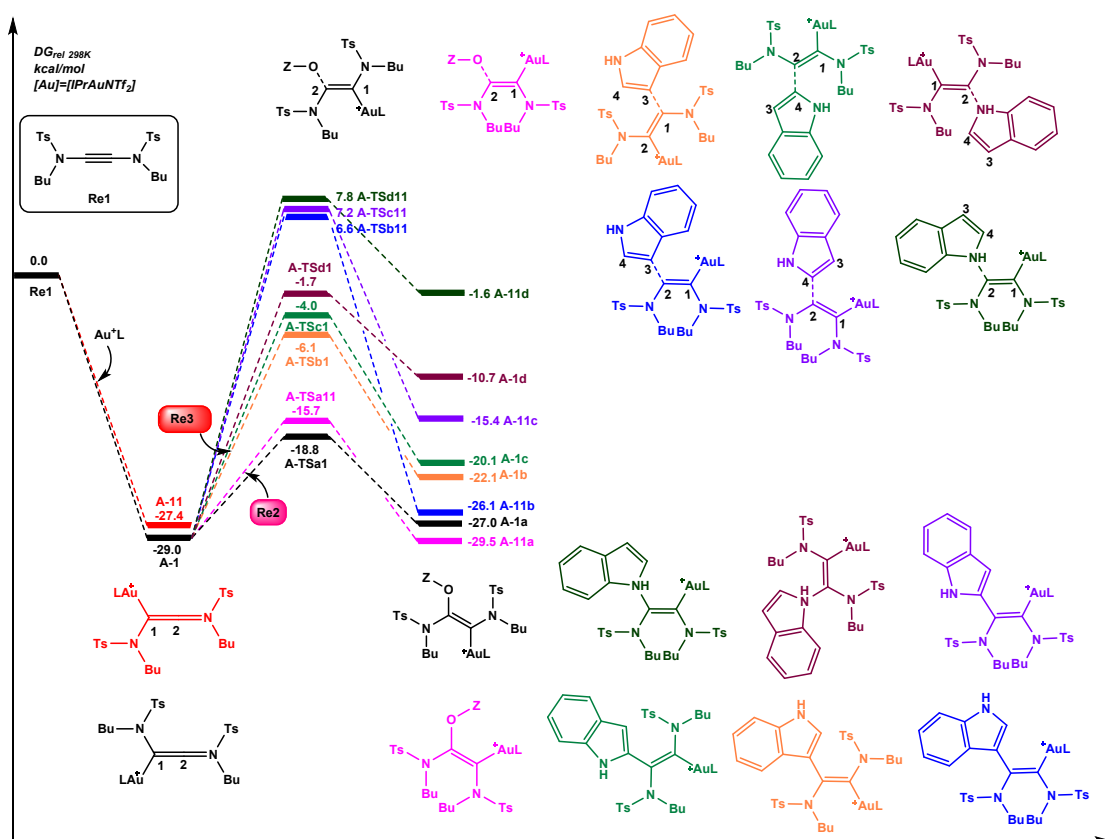

Figure S10. Different conformers and configurations of the transition states for the C-X (X=O, C, N) bond formation (series A). Energy values are in kcal/mol.

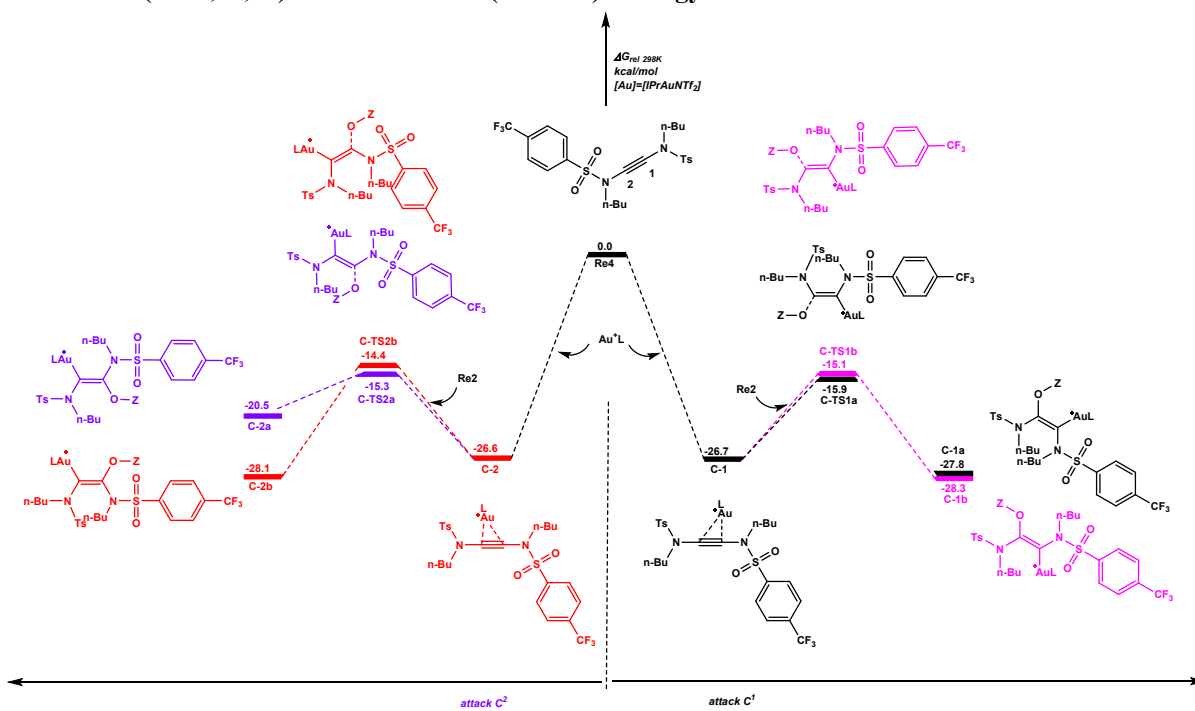

Figure S11. Different conformers and configurations of the transition states for the C-O bond formation (series C). Energy values are in kcal/mol.

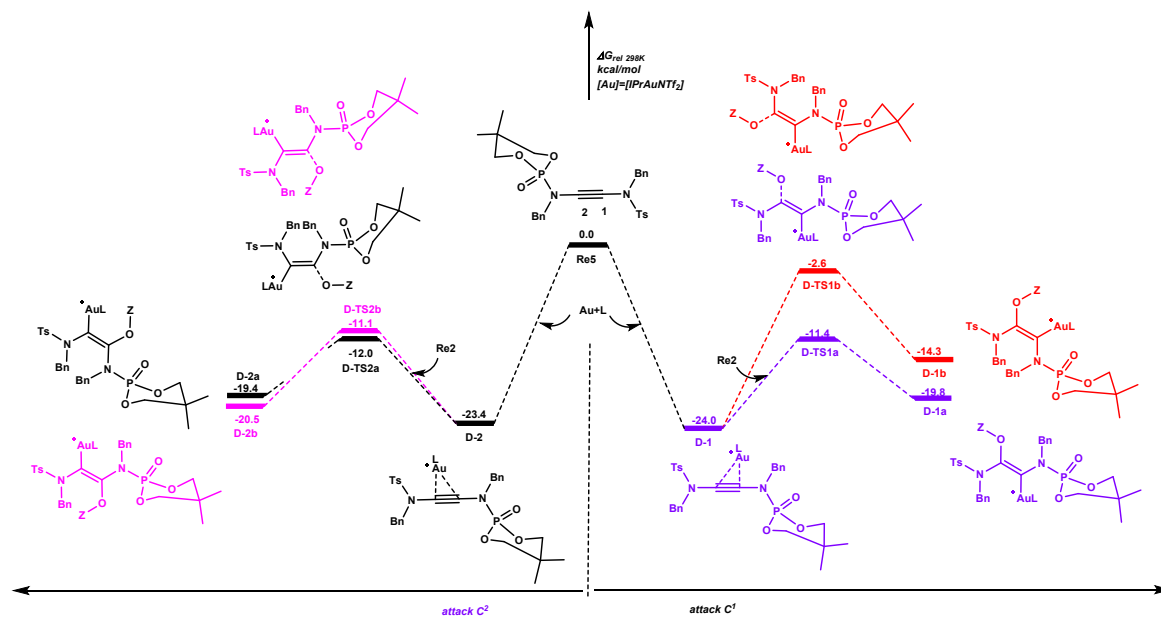

Figure S12. Different conformers and configurations of the transition states for the C-O bond formation (series D). Energy values are in kcal/mol.

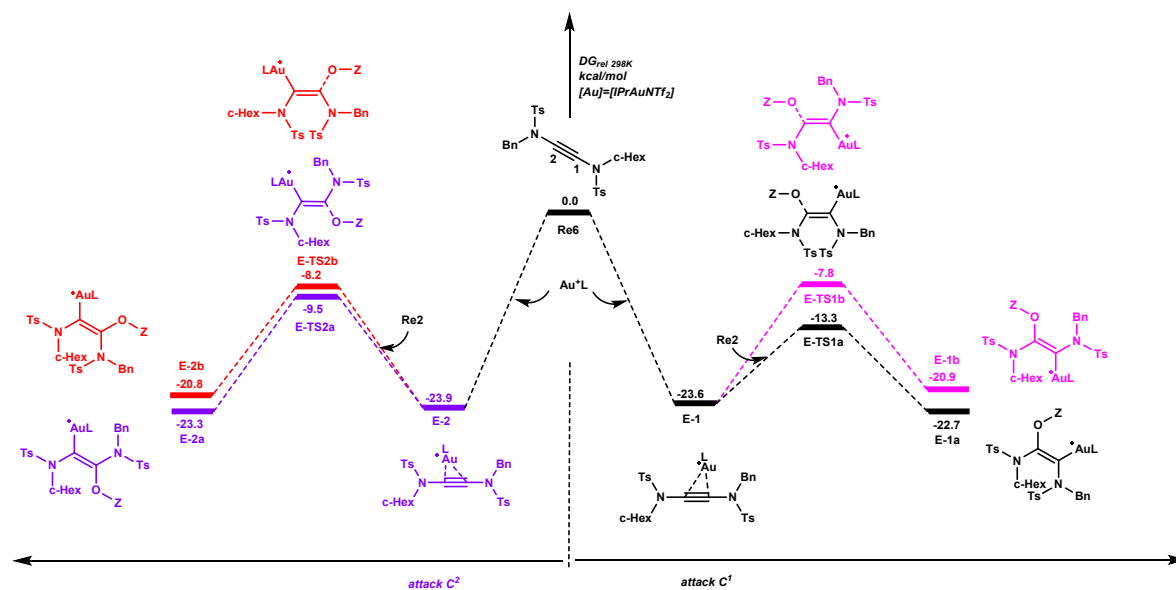

Figure S13. Different conformers and configurations of the transition states for the C-O bond formation (series E). Energy values are in kcal/mol.

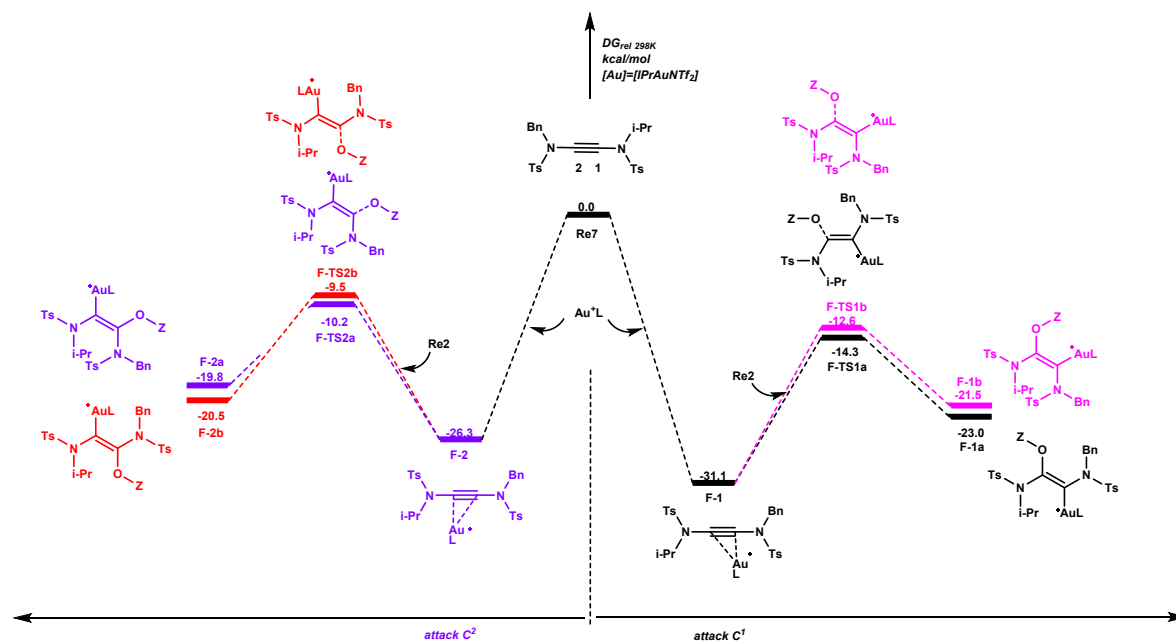

Figure S14. Different conformers and configurations of the transition states for the C-O bond formation (series F). Energy values are in kcal/mol.

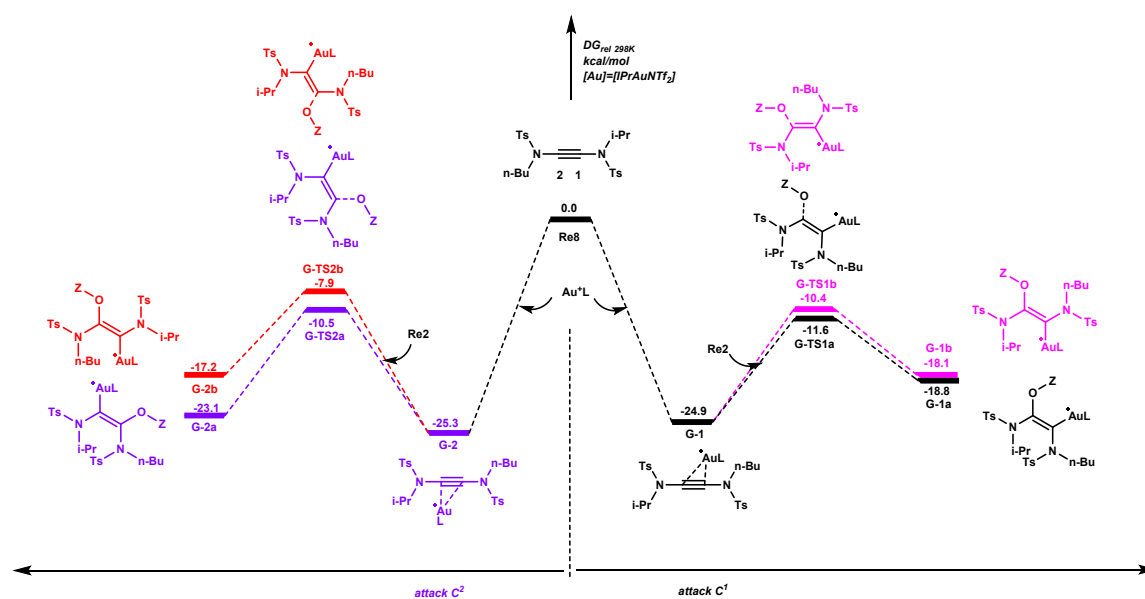

Figure S15. Different conformers and configurations of the transition states for the C-O bond formation (series G). Energy values are in kcal/mol.

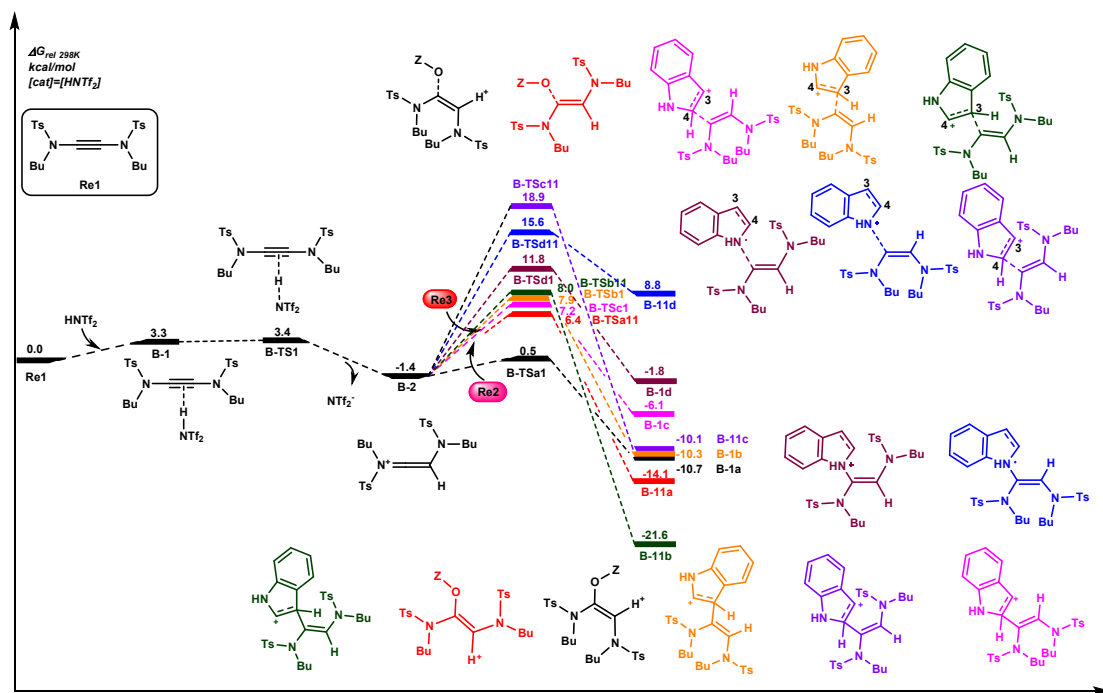

Figure S16. Different conformers and configurations of the transition states for the C-X (X=O, C, N) bond formation (series B). Energy values are in kcal/mol.

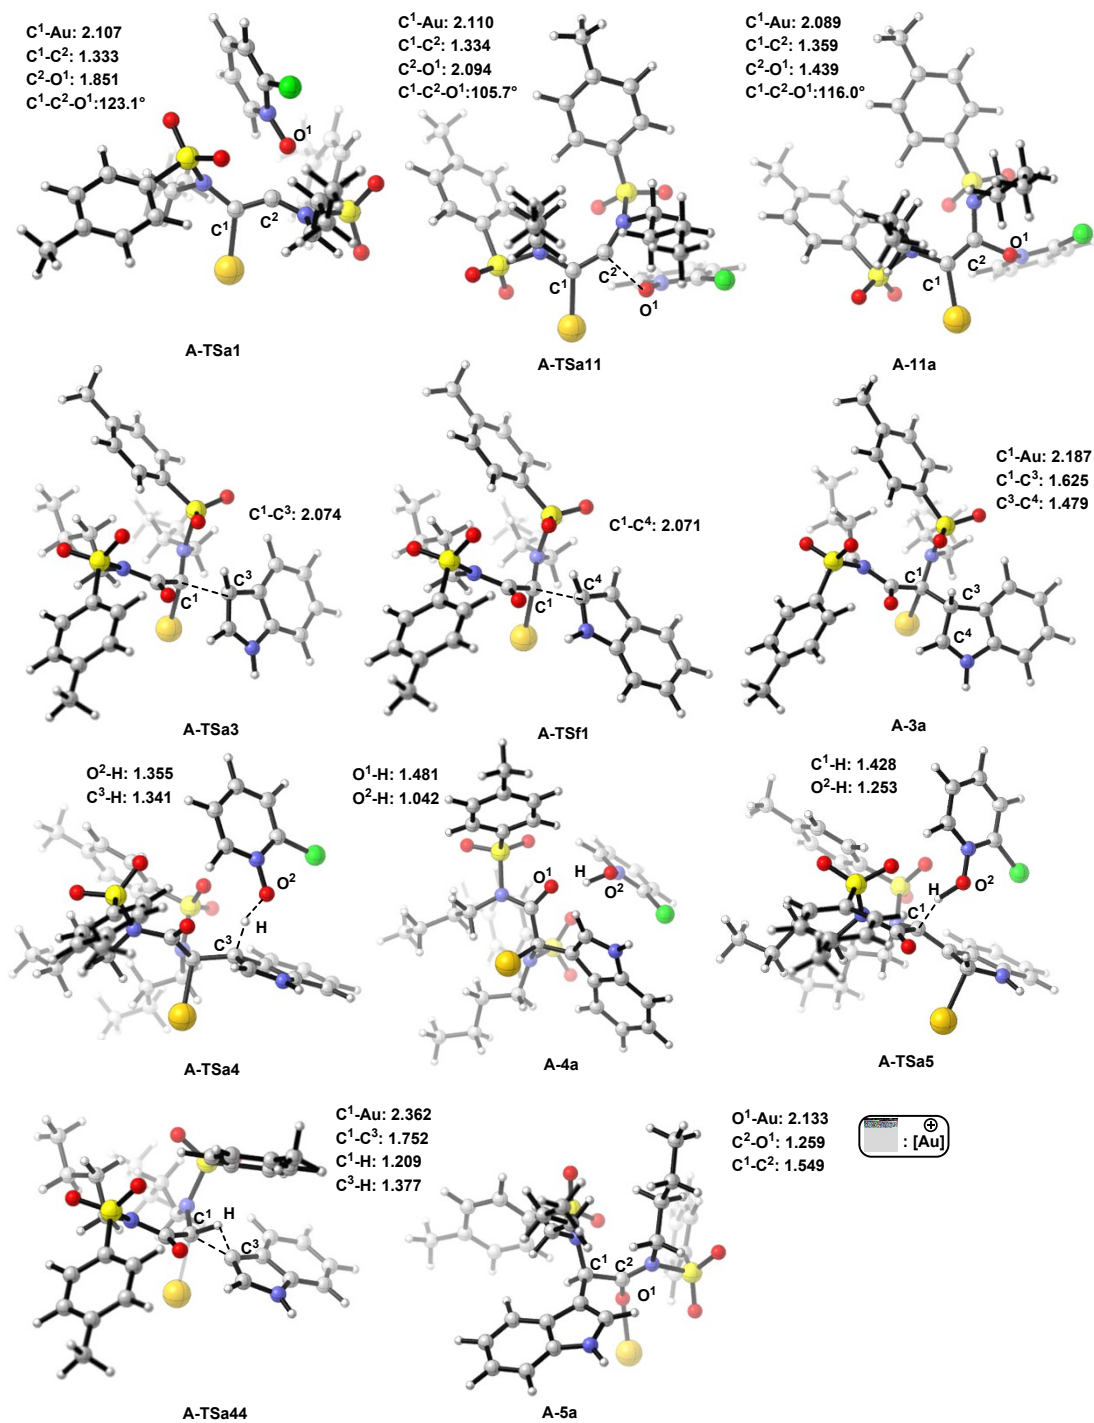

Figure S17. Optimized 3D geometries of series A. Bond lengths are in Å.

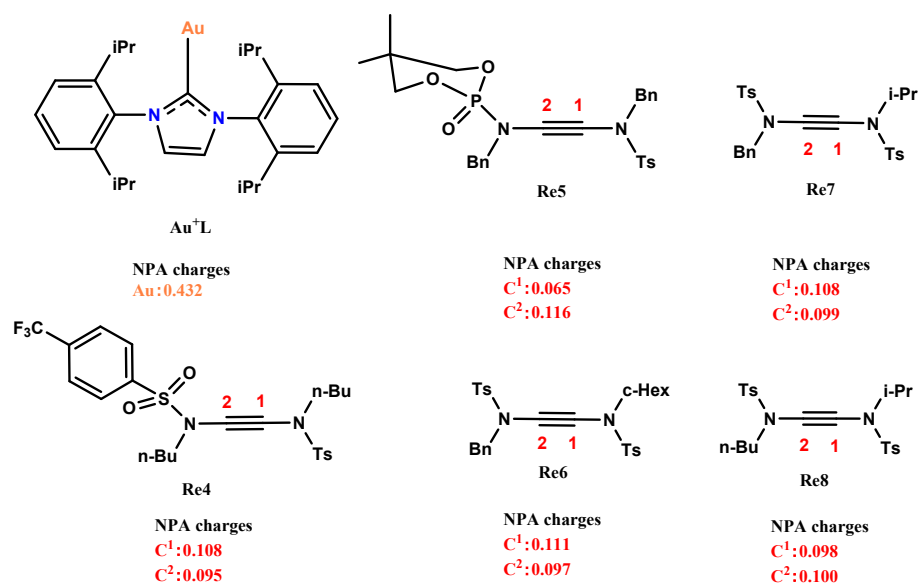

**Figure S18. Calculated NPA charges (in e) for Re4-Re8.**

## Cartesian coordinates of the stationary points

Au<sup>+</sup>L

|    |              |              |              |
|----|--------------|--------------|--------------|
| 79 | -0.000002697 | -0.000000376 | -0.000001849 |
| 6  | 0.000003672  | -0.000006397 | 0.000000695  |
| 6  | -0.000007403 | 0.000009848  | -0.000007911 |
| 6  | 0.000006326  | -0.00000916  | -0.000006296 |
| 1  | -0.000001846 | -0.000000503 | 0.000002026  |
| 1  | 0.00000221   | 0.000000582  | 0.000001623  |
| 7  | -0.000004219 | -0.000003133 | 0.000006137  |
| 7  | 0.000001664  | 0.000000445  | 0.000009086  |
| 6  | 0.000006245  | -0.000007552 | 0.000002945  |
| 6  | -0.000004924 | -0.000001054 | -0.000000334 |
| 6  | -0.000001715 | 0.000004932  | -0.000001784 |
| 6  | 0.000002038  | 0.000001694  | -0.000001238 |
| 6  | 0.000002048  | -0.000000574 | 0.0000009    |
| 6  | -0.000001874 | -0.000000171 | -0.000000471 |
| 1  | 0.000000017  | 0.000000473  | -0.00000001  |
| 1  | 0.000000638  | 0.000000395  | -0.000000129 |
| 1  | 0.000000285  | 0.000000409  | 0.000000235  |
| 6  | -0.000007645 | -0.000003626 | 0.00000063   |
| 6  | 0.000002737  | 0.000005337  | -0.000003342 |
| 6  | 0.000005555  | -0.000002119 | 0.000002366  |
| 6  | -0.000004061 | -0.000001795 | 0.000000247  |
| 6  | 0.000000929  | 0.000001152  | -0.000001196 |
| 6  | 0.000002319  | 0.000002097  | -0.00000079  |
| 1  | -0.000001176 | -0.000000468 | 0.000000551  |
| 1  | -0.000000076 | 0.000000059  | 0.000000086  |
| 1  | -0.000000634 | 0.000000731  | 0.000000167  |
| 6  | 0.000000509  | -0.000006013 | -0.000000209 |
| 6  | -0.000001636 | 0.000001431  | 0.000000511  |
| 6  | 0.00000295   | 0.000004007  | 0.000002875  |
| 1  | -0.000002667 | 0.000002004  | 0.000000089  |
| 1  | 0.000000232  | -0.000000444 | -0.000000785 |
| 1  | 0.000000427  | -0.000000057 | -0.000000954 |
| 1  | 0.000000498  | -0.000000288 | -0.000000086 |
| 1  | -0.000000713 | 0.000000242  | -0.000000428 |
| 1  | -0.00000058  | -0.000000435 | -0.000000088 |
| 1  | -0.000000317 | -0.000000696 | -0.000000094 |
| 6  | -0.000001737 | 0.000000183  | -0.000004379 |
| 6  | 0.000000814  | 0.000007395  | 0.00000712   |



|   |              |              |              |
|---|--------------|--------------|--------------|
| 6 | 0.000001555  | 0.000000453  | -0.00000181  |
| 1 | 0.000002444  | 0.000001565  | 0.000000897  |
| 1 | 0.000001092  | 0.000000075  | -0.000003593 |
| 1 | -0.000000036 | -0.000001711 | -0.000000112 |
| 1 | 0.000000562  | -0.000001759 | -0.000000227 |
| 1 | 0.000000199  | 0.000000398  | 0.000000525  |
| 1 | 0.000000274  | 0.000000361  | 0.000000827  |
| 1 | -0.00000106  | 0.000000223  | -0.000000173 |
| 6 | -0.000000521 | -0.000003697 | -0.000002252 |
| 6 | -0.000002237 | 0.000002302  | 0.000002812  |
| 6 | 0.000000659  | -0.000000168 | 0.000002139  |
| 1 | 0.000001662  | 0.000000971  | -0.000000639 |
| 1 | 0.000000348  | -0.000000035 | -0.000000738 |
| 1 | 0.00000013   | -0.000000163 | -0.000000534 |
| 1 | 0.00000134   | -0.000000632 | -0.000000566 |
| 1 | -0.00000008  | -0.000000549 | -0.000000224 |
| 1 | -0.000000274 | 0.000000483  | -0.000001001 |
| 1 | 0.000000046  | 0.000000028  | -0.000000651 |
| 6 | 0.000000271  | -0.000000015 | 0.000001548  |
| 6 | 0.000000013  | -0.000000687 | -0.000001261 |
| 6 | -0.000000726 | 0.000003822  | 0.000002961  |
| 1 | -0.000001024 | 0.000000732  | -0.000000892 |
| 1 | -0.000000102 | 0.000000306  | 0.000000498  |
| 1 | 0.000000044  | -0.000000088 | 0.000000119  |
| 1 | -0.000000116 | 0.000000008  | 0.000000421  |
| 1 | -0.000000152 | -0.000000595 | -0.00000019  |
| 1 | -0.000000085 | -0.000000023 | -0.000000729 |
| 1 | -0.000000092 | -0.000000424 | 0.000000203  |

|                                              |                             |
|----------------------------------------------|-----------------------------|
| Zero-point correction=                       | 0.572657 (Hartree/Particle) |
| Thermal correction to Energy=                | 0.605223                    |
| Thermal correction to Enthalpy=              | 0.606167                    |
| Thermal correction to Gibbs Free Energy=     | 0.504559                    |
| Sum of electronic and zero-point Energies=   | -1294.803490                |
| Sum of electronic and thermal Energies=      | -1294.770924                |
| Sum of electronic and thermal Enthalpies=    | -1294.769980                |
| Sum of electronic and thermal Free Energies= | -1294.871588                |

Re1

|    |              |              |              |
|----|--------------|--------------|--------------|
| 6  | 0.000002518  | 0.000002529  | 0.0000004    |
| 6  | 0.000002401  | -0.000002598 | -0.000003818 |
| 7  | -0.000000723 | 0.000002911  | -0.000005881 |
| 7  | -0.000005278 | -0.000004575 | 0.000001201  |
| 16 | 0.000004615  | 0.000003918  | 0.000001183  |
| 8  | 0.000004288  | 0.000000522  | -0.000003258 |

|    |              |              |              |
|----|--------------|--------------|--------------|
| 8  | -0.00000179  | -0.00000111  | -0.000006423 |
| 6  | -0.000000108 | -0.000000679 | 0.00000264   |
| 6  | -0.000000071 | 0.000002012  | -0.000001752 |
| 6  | -0.000000021 | 0.000005124  | 0.000000666  |
| 6  | -0.000000792 | 0.000003398  | 0.000000136  |
| 6  | -0.000001617 | 0.000000339  | -0.0000007   |
| 6  | -0.000000835 | 0.000004066  | -0.000001301 |
| 1  | 0.000001433  | 0.000002771  | -0.00000103  |
| 1  | -0.000000132 | 0.000003529  | -0.000000382 |
| 1  | -0.000000943 | 0.000002378  | 0.000000615  |
| 1  | 0.000000228  | 0.000000808  | -0.00000006  |
| 6  | -0.000001998 | 0.000004306  | 0.000000212  |
| 1  | -0.000002626 | 0.000004529  | 0.000001697  |
| 1  | -0.000001634 | 0.000004266  | -0.000000696 |
| 1  | -0.00000086  | 0.000002908  | 0.00000157   |
| 6  | 0.000002299  | -0.000002104 | 0.000002869  |
| 6  | -0.00000025  | 0.000000912  | -0.000002836 |
| 1  | 0.000002274  | -0.00000101  | -0.000000905 |
| 1  | 0.00000193   | 0.000001222  | -0.000002221 |
| 6  | 0.000000883  | -0.000000964 | 0.000000037  |
| 1  | 0.000000685  | -0.000000681 | -0.000000586 |
| 1  | 0.000001281  | 0.000000487  | -0.000000236 |
| 6  | 0.000002028  | 0.000000663  | -0.000000498 |
| 1  | 0.000002391  | 0.000000438  | -0.000002283 |
| 1  | 0.000002001  | -0.000001255 | -0.000001362 |
| 1  | 0.000000794  | -0.000000162 | -0.000000705 |
| 1  | 0.000000594  | -0.000000558 | -0.000000905 |
| 1  | 0.000001005  | 0.000000024  | -0.000000443 |
| 6  | -0.000000205 | -0.000000891 | 0.000001576  |
| 6  | -0.000004312 | -0.000002148 | 0.000002451  |
| 1  | -0.00000034  | -0.00000134  | 0.000001575  |
| 1  | -0.000001531 | -0.000001502 | 0.000000186  |
| 6  | -0.000003532 | -0.000002441 | 0.000000346  |
| 1  | -0.000000418 | -0.000001462 | 0.00000055   |
| 1  | 0.000000698  | -0.000002938 | 0.000001774  |
| 6  | -0.000000939 | -0.0000003   | 0.000004844  |
| 1  | -0.000001916 | -0.000000863 | 0.000000593  |
| 1  | -0.000002026 | -0.000002403 | 0.000002149  |
| 1  | -0.00000459  | -0.000001689 | 0.000003266  |
| 1  | -0.00000173  | -0.000000222 | 0.000000552  |
| 1  | -0.00000204  | -0.000004436 | 0.000001443  |
| 16 | 0.000005061  | 0.00000632   | -0.000000011 |
| 8  | 0.000000065  | -0.000009255 | 0.000002715  |
| 8  | -0.000001067 | -0.000005049 | -0.000000195 |

|                                                     |             |             |                                    |
|-----------------------------------------------------|-------------|-------------|------------------------------------|
| 6                                                   | 0.00000764  | 0.00002923  | -0.00002022                        |
| 6                                                   | 0.00000453  | -0.00003435 | -0.00003382                        |
| 6                                                   | -0.0000147  | -0.00003686 | 0.00005631                         |
| 6                                                   | 0.00000959  | -0.00001773 | 0.00001613                         |
| 1                                                   | 0.00001421  | -0.00000754 | -0.00000971                        |
| 6                                                   | 0.00000417  | -0.00003253 | -0.00002188                        |
| 1                                                   | -0.00000049 | -0.00002107 | 0.00000737                         |
| 6                                                   | -0.00002426 | 0.00004843  | -0.00000562                        |
| 1                                                   | 0.00002317  | 0.00000758  | -0.00001183                        |
| 1                                                   | 0.00000295  | -0.00000797 | 0.00000854                         |
| 6                                                   | 0.00003665  | 0.00001351  | -0.00000585                        |
| 1                                                   | -0.00000799 | -0.00000935 | 0.00000705                         |
| 1                                                   | -0.00000425 | -0.00001111 | -0.00000239                        |
| 1                                                   | -0.00000027 | 0.00000229  | -0.00000077                        |
| <b>Zero-point correction=</b>                       |             |             | <b>0.526554 (Hartree/Particle)</b> |
| <b>Thermal correction to Energy=</b>                |             |             | <b>0.562200</b>                    |
| <b>Thermal correction to Enthalpy=</b>              |             |             | <b>0.563144</b>                    |
| <b>Thermal correction to Gibbs Free Energy=</b>     |             |             | <b>0.450013</b>                    |
| <b>Sum of electronic and zero-point Energies=</b>   |             |             | <b>-2139.935753</b>                |
| <b>Sum of electronic and thermal Energies=</b>      |             |             | <b>-2139.900108</b>                |
| <b>Sum of electronic and thermal Enthalpies=</b>    |             |             | <b>-2139.899163</b>                |
| <b>Sum of electronic and thermal Free Energies=</b> |             |             | <b>-2140.012294</b>                |

## Re2

|                                                     |              |              |                                    |
|-----------------------------------------------------|--------------|--------------|------------------------------------|
| 6                                                   | 0.000293054  | -0.000124358 | 0.000000454                        |
| 6                                                   | 0.000065234  | 0.000192653  | 0.000000163                        |
| 6                                                   | -0.000273087 | -0.0000955   | -0.000000116                       |
| 6                                                   | 0.000280194  | -0.000171839 | 0.000000156                        |
| 6                                                   | -0.00002766  | 0.000129558  | 0.000000486                        |
| 1                                                   | 0.000026976  | 0.000048818  | 0.000000003                        |
| 1                                                   | -0.000077203 | -0.000013552 | -0.000000023                       |
| 7                                                   | -0.000339847 | 0.00003199   | -0.000001902                       |
| 8                                                   | 0.000060784  | 0.000000854  | 0.000000767                        |
| 1                                                   | -0.000045604 | 0.000009179  | 0.000000027                        |
| 1                                                   | 0.000001723  | -0.000015665 | -0.000000049                       |
| 17                                                  | 0.000035436  | 0.000007862  | 0.000000033                        |
| <b>Zero-point correction=</b>                       |              |              | <b>0.083412 (Hartree/Particle)</b> |
| <b>Thermal correction to Energy=</b>                |              |              | <b>0.089604</b>                    |
| <b>Thermal correction to Enthalpy=</b>              |              |              | <b>0.090548</b>                    |
| <b>Thermal correction to Gibbs Free Energy=</b>     |              |              | <b>0.052545</b>                    |
| <b>Sum of electronic and zero-point Energies=</b>   |              |              | <b>-782.958570</b>                 |
| <b>Sum of electronic and thermal Energies=</b>      |              |              | <b>-782.952378</b>                 |
| <b>Sum of electronic and thermal Enthalpies=</b>    |              |              | <b>-782.951434</b>                 |
| <b>Sum of electronic and thermal Free Energies=</b> |              |              | <b>-782.989437</b>                 |

Re3

|   |              |              |              |
|---|--------------|--------------|--------------|
| 6 | -0.000047117 | 0.000178025  | 0.000026371  |
| 6 | -0.000080455 | -0.000018268 | -0.000112071 |
| 6 | 0.000002223  | -0.000129103 | -0.00001906  |
| 6 | 0.000101441  | 0.000097072  | 0.000015446  |
| 6 | -0.000113708 | 0.000078376  | 0.000026887  |
| 6 | 0.000015328  | -0.000161323 | -0.000013795 |
| 6 | -0.00029092  | -0.000276189 | -0.00005816  |
| 6 | 0.000526845  | 0.000098413  | 0.000080975  |
| 1 | -0.000005093 | 0.000002713  | 0.000004403  |
| 1 | -0.000006001 | 0.000001427  | 0.00000564   |
| 1 | 0.000010332  | -0.000004363 | -0.000013365 |
| 1 | 0.000005286  | 0.000009973  | 0.000008291  |
| 1 | -0.00000772  | 0.000004374  | 0.000020401  |
| 1 | -0.000127499 | 0.000032375  | -0.000060934 |
| 7 | 0.000053859  | 0.000094466  | 0.000086032  |
| 1 | -0.000036799 | -0.000007969 | 0.000002942  |

|                                              |  |  |                             |
|----------------------------------------------|--|--|-----------------------------|
| Zero-point correction=                       |  |  | 0.129871 (Hartree/Particle) |
| Thermal correction to Energy=                |  |  | 0.136183                    |
| Thermal correction to Enthalpy=              |  |  | 0.137127                    |
| Thermal correction to Gibbs Free Energy=     |  |  | 0.099550                    |
| Sum of electronic and zero-point Energies=   |  |  | -363.700169                 |
| Sum of electronic and thermal Energies=      |  |  | -363.693857                 |
| Sum of electronic and thermal Enthalpies=    |  |  | -363.692913                 |
| Sum of electronic and thermal Free Energies= |  |  | -363.730490                 |

A-1

|    |              |              |              |
|----|--------------|--------------|--------------|
| 6  | 0.000005962  | 0.000003775  | -0.000006239 |
| 6  | -0.0000057   | 0.00000119   | 0.000006608  |
| 7  | -0.000001147 | -0.000000677 | 0.000004832  |
| 7  | 0.000001277  | -0.000003275 | -0.00000525  |
| 16 | -0.000004009 | -0.00000371  | 0.000004139  |
| 8  | 0.000003825  | 0.000001888  | -0.00000598  |
| 8  | 0.000002115  | -0.000000283 | 0.000000881  |
| 6  | 0.000002051  | -0.000000254 | -0.000000351 |
| 6  | -0.000000458 | 0.00000068   | 0.000000019  |
| 6  | 0.000001049  | -0.000000143 | -0.000003075 |
| 6  | 0.000000269  | -0.000001079 | 0.000000059  |
| 6  | 0.000000944  | 0.000001703  | -0.000000525 |
| 6  | 0.000000035  | -0.000000841 | -0.000001469 |
| 1  | 0.000001212  | -0.000000453 | -0.00000101  |
| 1  | 0.000001055  | -0.000000276 | -0.000001185 |

|    |              |              |              |
|----|--------------|--------------|--------------|
| 1  | 0.000000481  | 0.000000381  | -0.000000612 |
| 1  | 0.000000582  | 0.000000095  | -0.000000764 |
| 6  | 0.00000139   | 0.000000778  | -0.000001223 |
| 1  | 0.000000628  | 0.000000496  | -0.000001143 |
| 1  | 0.000000835  | 0.000000446  | -0.000001484 |
| 1  | 0.000000652  | 0.000000651  | -0.000001251 |
| 6  | -0.00000193  | 0.000000212  | -0.000003303 |
| 6  | -0.000000683 | -0.000001131 | -0.000000683 |
| 1  | 0.000000772  | -0.000000677 | -0.000001409 |
| 1  | 0.000000839  | 0.000000061  | 0.000001024  |
| 6  | 0.000001769  | -0.000000324 | -0.000000674 |
| 1  | 0.000001177  | -0.000000749 | -0.000000029 |
| 1  | 0.00000008   | 0.000000171  | -0.000000198 |
| 6  | 0.000000642  | -0.000001656 | -0.000001925 |
| 1  | 0.000000728  | -0.000000496 | -0.000001025 |
| 1  | 0.000000498  | -0.000000208 | -0.000001018 |
| 1  | 0.000001129  | -0.000000068 | -0.000001013 |
| 1  | 0.00000082   | -0.000000803 | -0.000000083 |
| 1  | 0.000000605  | -0.000000337 | -0.000000575 |
| 6  | 0.000003011  | -0.00000135  | 0.000002457  |
| 6  | -0.000001423 | 0.000002077  | 0.000001253  |
| 1  | -0.000001504 | -0.000000588 | 0.000000078  |
| 1  | -0.000001048 | -0.000000024 | 0.000000958  |
| 6  | -0.000000035 | 0.000000088  | 0.000000061  |
| 1  | -0.000000059 | -0.000000003 | 0.000000155  |
| 1  | -0.000000164 | -0.000000963 | 0.000000255  |
| 6  | -0.000000279 | 0.000000872  | 0.000001482  |
| 1  | -0.000000595 | -0.000000377 | 0.000000673  |
| 1  | -0.000000918 | -0.000000407 | 0.000000855  |
| 1  | -0.000001313 | 0.000000426  | 0.000000844  |
| 1  | -0.000000442 | 0.000000494  | 0.000000113  |
| 1  | -0.000000059 | 0.000000746  | 0.000000791  |
| 16 | -0.000000743 | 0.000000487  | 0.000001252  |
| 8  | -0.000000886 | 0.000000904  | -0.000000003 |
| 8  | -0.000002102 | -0.000003394 | 0.000000125  |
| 6  | 0.000001194  | -0.000002887 | -0.000000288 |
| 6  | -0.000001128 | -0.000000448 | 0.000000478  |
| 6  | -0.000000315 | -0.000000011 | 0.000002389  |
| 6  | 0.000000848  | -0.000002269 | 0.000000292  |
| 1  | 0.000000052  | -0.000001022 | -0.000000016 |
| 6  | -0.000000417 | -0.000002224 | 0.000000331  |
| 1  | -0.000000636 | -0.000001742 | -0.000000102 |
| 6  | -0.000000699 | -0.000000949 | 0.000000438  |
| 1  | 0.000000033  | -0.000001564 | -0.000000168 |

|    |             |             |             |
|----|-------------|-------------|-------------|
| 1  | -0.00000598 | -0.00001648 | 0.00001264  |
| 6  | 0.00000114  | -0.00001754 | 0.00000638  |
| 1  | -0.00000317 | -0.000002   | 0.00000858  |
| 1  | -0.00000255 | -0.00002368 | 0.00000488  |
| 1  | -0.0000001  | -0.00001951 | 0.00000319  |
| 79 | -0.00002542 | 0.00000712  | -0.00002539 |
| 6  | 0.00004886  | -0.00005413 | 0.00009746  |
| 6  | 0.00005917  | 0.00004767  | -0.00001523 |
| 6  | -0.00005672 | -0.00000151 | -0.00003001 |
| 1  | 0.00000658  | 0.00000927  | 0.00001083  |
| 1  | -0.00000944 | 0.00000251  | 0.0000113   |
| 7  | -0.00001578 | 0.00003135  | -0.00005212 |
| 7  | -0.00004684 | 0.0000076   | -0.0000205  |
| 6  | -0.00002679 | -0.0000435  | 0.00002818  |
| 6  | 0.0000032   | 0.00002896  | -0.00001194 |
| 6  | 0.00000146  | 0.0000201   | -0.00001947 |
| 6  | -0.00000189 | -0.00000006 | -0.00000607 |
| 6  | 0.00000964  | -0.00001097 | -0.00000387 |
| 6  | 0.00000484  | 0.00000036  | -0.00000432 |
| 1  | 0.00000896  | 0.00000476  | -0.0000094  |
| 1  | 0.00000171  | -0.00000604 | -0.00000614 |
| 1  | 0.00000582  | -0.00000218 | -0.00000951 |
| 6  | 0.00001271  | -0.00000802 | 0.00003296  |
| 6  | -0.00003664 | 0.00000718  | -0.00000476 |
| 6  | -0.00000697 | 0.00002572  | 0.00002157  |
| 6  | 0.0000053   | -0.0000026  | 0.00001915  |
| 6  | -0.00000581 | 0.00001182  | 0.00000314  |
| 6  | -0.00001706 | 0.00000725  | 0.00000047  |
| 1  | -0.00000794 | 0.00000037  | 0.00000669  |
| 1  | -0.00000533 | 0.00000694  | 0.00000602  |
| 1  | -0.00000642 | 0.0000074   | 0.0000136   |
| 6  | 0.00001543  | 0.00001601  | 0.00000121  |
| 6  | -0.00000373 | 0.00001404  | 0.00001726  |
| 6  | 0.00000456  | -0.00000496 | 0.00002541  |
| 1  | 0.00000574  | 0.00000115  | 0.00001028  |
| 1  | -0.00001265 | -0.00000508 | 0.00000697  |
| 1  | -0.00001178 | -0.00000039 | 0.00000968  |
| 1  | -0.00000697 | 0.00000392  | 0.00001642  |
| 1  | -0.00001031 | 0.00000085  | -0.00000474 |
| 1  | -0.00001328 | -0.00000969 | 0.00001045  |
| 1  | -0.00000826 | -0.00000317 | 0.00001003  |
| 6  | 0.00003927  | 0.00003459  | -0.00001759 |
| 6  | -0.00003509 | 0.00000364  | 0.00000081  |
| 6  | -0.00002381 | -0.00000402 | 0.00001251  |

|   |             |             |             |
|---|-------------|-------------|-------------|
| 1 | 0.00000689  | 0.00001582  | 0.00000205  |
| 1 | 0.00000437  | 0.0000066   | -0.00000174 |
| 1 | 0.00000047  | 0.00000538  | -0.00000317 |
| 1 | 0.00000267  | 0.00002384  | 0.00000428  |
| 1 | -0.00000305 | 0.00001605  | 0.00000305  |
| 1 | 0.00000448  | 0.00000858  | -0.00000106 |
| 1 | -0.00000429 | 0.00002009  | 0.00000261  |
| 6 | 0.00002128  | -0.00000615 | -0.00000421 |
| 6 | -0.00001904 | 0.00000943  | 0.00000163  |
| 6 | 0.00000174  | -0.00000493 | 0.00000399  |
| 1 | 0.00001423  | -0.00000168 | 0.00000389  |
| 1 | -0.00000064 | -0.00001052 | 0.00000594  |
| 1 | -0.00000184 | -0.00000913 | 0.00000229  |
| 1 | 0.00001321  | -0.00001856 | -0.00000571 |
| 1 | -0.00000222 | 0.00000101  | 0.00000218  |
| 1 | -0.00000325 | 0.0000014   | 0.00000136  |
| 1 | -0.00000695 | -0.00000422 | 0.00000027  |
| 6 | 0.00002519  | 0.0000068   | -0.00000426 |
| 6 | -0.00001023 | 0.00001609  | -0.00000329 |
| 6 | -0.00001165 | 0.00000199  | -0.00001501 |
| 1 | -0.00000109 | 0.00001332  | -0.00000355 |
| 1 | 0.00000495  | 0.00001082  | -0.0000067  |
| 1 | 0.0000062   | 0.00001386  | -0.00000852 |
| 1 | 0.00000876  | 0.00001054  | -0.00000957 |
| 1 | 0.00000705  | 0.00000559  | -0.00000814 |
| 1 | 0.00000974  | 0.00000965  | -0.00001044 |
| 1 | 0.00000575  | 0.00001125  | -0.00000607 |

|                                              |                             |
|----------------------------------------------|-----------------------------|
| Zero-point correction=                       | 1.101424 (Hartree/Particle) |
| Thermal correction to Energy=                | 1.170698                    |
| Thermal correction to Enthalpy=              | 1.171643                    |
| Thermal correction to Gibbs Free Energy=     | 0.984372                    |
| Sum of electronic and zero-point Energies=   | -3434.798009                |
| Sum of electronic and thermal Energies=      | -3434.728735                |
| Sum of electronic and thermal Enthalpies=    | -3434.727790                |
| Sum of electronic and thermal Free Energies= | -3434.915061                |

A-11

|    |              |             |             |
|----|--------------|-------------|-------------|
| 6  | 0.000010646  | 0.00001845  | 0.00001116  |
| 6  | -0.000011031 | -0.00000085 | 0.000003747 |
| 7  | -0.00000693  | 0.00003538  | 0.00002315  |
| 7  | 0.000006653  | -0.00000552 | 0.00001917  |
| 16 | 0.00002547   | -0.00005961 | -0.00002182 |
| 8  | -0.00000515  | 0.00000331  | 0.00001275  |
| 8  | -0.00003579  | -0.00000217 | 0.00001016  |

|    |              |              |              |
|----|--------------|--------------|--------------|
| 6  | -0.000002573 | 0.000000287  | 0.000001521  |
| 6  | -0.000001807 | 0.000000877  | 0.000002795  |
| 6  | -0.000002799 | 0.000000566  | 0.000002544  |
| 6  | -0.000002687 | 0.00000111   | 0.000001484  |
| 6  | -0.000004286 | 0.000000673  | 0.000000992  |
| 6  | -0.000002042 | 0.000000806  | 0.000001701  |
| 1  | -0.000001967 | 0.000000313  | 0.000002127  |
| 1  | -0.000002872 | 0.000000489  | 0.000003021  |
| 1  | -0.000003517 | 0.000000539  | 0.000001319  |
| 1  | -0.000002486 | 0.000000033  | 0.000000288  |
| 6  | -0.000003849 | 0.000000226  | 0.000002582  |
| 1  | -0.000004556 | 0.000000992  | 0.000002289  |
| 1  | -0.000004038 | 0.000000846  | 0.000002936  |
| 1  | -0.000003944 | 0.000000881  | 0.00000304   |
| 6  | 0.000001258  | 0.000000458  | -0.000000119 |
| 6  | 0.000000371  | 0.000000592  | 0.000002851  |
| 1  | -0.000000505 | -0.000000098 | 0.000002466  |
| 1  | -0.000000788 | 0.000000562  | 0.000002093  |
| 6  | 0.000000062  | 0.000000427  | 0.000003071  |
| 1  | 0.000000816  | -0.000000383 | 0.000001387  |
| 1  | -0.000000434 | 0.000000277  | 0.000002272  |
| 6  | 0.000001106  | 0.000000072  | 0.000002835  |
| 1  | -0.000000003 | 0.000000188  | 0.000003232  |
| 1  | 0.000000866  | 0.000000026  | 0.000002925  |
| 1  | 0.000001145  | 0.000000011  | 0.000003533  |
| 1  | 0.000001283  | 0.000000029  | 0.000002748  |
| 1  | 0.000000767  | 0.000000062  | 0.000003018  |
| 6  | -0.000004152 | 0.000002184  | -0.00000136  |
| 6  | -0.000000484 | -0.000001226 | 0.000001421  |
| 1  | -0.000001444 | 0.000000197  | 0.000000469  |
| 1  | -0.000002196 | 0.000000158  | 0.000000654  |
| 6  | -0.000002045 | 0.000000039  | 0.000001273  |
| 1  | -0.000000092 | 0.000000657  | 0.000001566  |
| 1  | -0.000000732 | 0.000000383  | 0.000000773  |
| 6  | -0.000001231 | 0.000000088  | 0.000001675  |
| 1  | -0.000002294 | 0.000000353  | 0.000001353  |
| 1  | -0.000001962 | 0.000000309  | 0.000001692  |
| 1  | -0.000001873 | 0.000000547  | 0.000002514  |
| 1  | -0.000001159 | 0.000000329  | 0.00000248   |
| 1  | -0.000001304 | 0.000000415  | 0.000002022  |
| 16 | -0.000001595 | -0.000003731 | 0.000001776  |
| 8  | -0.000003076 | -0.000000636 | -0.000003607 |
| 8  | -0.000001185 | 0.00000119   | -0.000001404 |
| 6  | -0.000000906 | 0.00000129   | -0.000000194 |



|    |              |              |              |
|----|--------------|--------------|--------------|
| 6  | -0.000000503 | -0.000000034 | -0.000001146 |
| 6  | 0.000000104  | 0.000000103  | -0.000001038 |
| 6  | -0.000001218 | 0.000000388  | 0.000000172  |
| 1  | -0.000001228 | -0.000000094 | -0.000000536 |
| 6  | 0.000001201  | -0.000000956 | -0.000000302 |
| 1  | 0.000000642  | -0.000000334 | -0.000000355 |
| 6  | 0.000000398  | 0.000000235  | -0.000001363 |
| 1  | -0.000000415 | 0.000000109  | -0.000000375 |
| 1  | 0.000001204  | 0.000000024  | -0.000000418 |
| 6  | 0.000001088  | 0.000000134  | -0.000000681 |
| 1  | 0.000000927  | -0.000000044 | -0.000000176 |
| 1  | 0.000000864  | -0.000000532 | -0.000000353 |
| 1  | 0.000000903  | -0.000000173 | -0.000000271 |
| 79 | -0.000000103 | -0.000000535 | -0.000002932 |
| 6  | 0.000000154  | 0.000003403  | -0.000000125 |
| 6  | 0.000002226  | 0.000000602  | -0.00000026  |
| 6  | -0.000000051 | -0.000000722 | -0.000001148 |
| 1  | 0.000001756  | -0.000000291 | -0.000001655 |
| 1  | 0.000002129  | -0.000000596 | -0.000001941 |
| 7  | 0.000003334  | -0.000002011 | -0.000000133 |
| 7  | 0.000000877  | -0.00000015  | -0.000000238 |
| 6  | 0.000000647  | -0.000001697 | -0.000000376 |
| 6  | 0.00000223   | 0.000001578  | -0.000001471 |
| 6  | 0.000002942  | -0.000000412 | -0.000001153 |
| 6  | 0.000001031  | -0.000000952 | -0.000002319 |
| 6  | 0.000003293  | 0.000001192  | -0.00000102  |
| 6  | 0.000001309  | -0.000000433 | -0.000000928 |
| 1  | 0.00000166   | -0.000000373 | -0.000002411 |
| 1  | 0.000002311  | -0.000000702 | -0.000000184 |
| 1  | 0.000002634  | -0.000000553 | -0.000001392 |
| 6  | 0.00000069   | -0.000001187 | 0.000000575  |
| 6  | 0.000000615  | 0.000000025  | -0.000001284 |
| 6  | -0.000000147 | -0.000000977 | -0.000002812 |
| 6  | 0.000000111  | -0.000000221 | -0.000000692 |
| 6  | -0.000000337 | 0.000000223  | -0.000001072 |
| 6  | -0.000001614 | 0.000000571  | -0.000000046 |
| 1  | -0.000000007 | 0.000000088  | 0.000000155  |
| 1  | -0.000001351 | 0.000000268  | -0.000001471 |
| 1  | -0.000001234 | 0.000000141  | -0.000000311 |
| 6  | -0.000000542 | -0.000000738 | 0.000000711  |
| 6  | 0.000001845  | 0.000000383  | -0.000000115 |
| 6  | 0.00000162   | 0.000001067  | 0.000001125  |
| 1  | 0.000001743  | -0.000000179 | 0.000000065  |
| 1  | 0.000001347  | 0.000000033  | -0.000000016 |

|   |              |              |               |
|---|--------------|--------------|---------------|
| 1 | 0.000001736  | -0.000000126 | 0.000000558   |
| 1 | 0.000000847  | -0.000000127 | 0.000000051   |
| 1 | 0.000001185  | -0.000000071 | 0.000000578   |
| 1 | 0.000000105  | 0.000000215  | 0.000000993   |
| 1 | 0.000001036  | -0.000000492 | 0.000001373   |
| 6 | -0.000000617 | -0.000000029 | -0.0000001    |
| 6 | -0.00000118  | 0.000000432  | -0.000000282  |
| 6 | -0.000000737 | 0.000000227  | -0.0000003258 |
| 1 | -0.000000243 | -0.000000412 | -0.0000002488 |
| 1 | -0.000001028 | 0.000000099  | -0.000001155  |
| 1 | -0.000000897 | -0.000000009 | -0.0000002529 |
| 1 | -0.000001496 | -0.000000032 | -0.000001933  |
| 1 | 0.000000225  | -0.000000159 | -0.0000002766 |
| 1 | -0.000000637 | 0.000000000  | -0.0000002492 |
| 1 | -0.000000512 | -0.000000184 | -0.0000002996 |
| 6 | 0.0000002545 | -0.000001182 | 0.000000498   |
| 6 | 0.000001783  | -0.000000138 | -0.000000112  |
| 6 | 0.000002721  | -0.000000375 | -0.000000986  |
| 1 | 0.000002063  | -0.000000142 | -0.000000215  |
| 1 | 0.000001129  | 0.000000141  | 0.000001235   |
| 1 | 0.000002417  | -0.000000023 | 0.000000862   |
| 1 | 0.000002568  | -0.000000471 | 0.000000896   |
| 1 | 0.000003128  | -0.000000614 | -0.000000367  |
| 1 | 0.000003502  | -0.000000307 | 0.000000041   |
| 1 | 0.000003087  | -0.000000448 | 0.000000506   |
| 6 | 0.000000487  | -0.000000767 | -0.0000004227 |
| 6 | 0.000002256  | -0.000000544 | -0.0000002775 |
| 6 | 0.000000435  | -0.000000083 | -0.000001887  |
| 1 | 0.000000239  | 0.000000028  | -0.0000002787 |
| 1 | 0.000002182  | -0.000000443 | -0.0000003313 |
| 1 | 0.000001298  | -0.000000638 | -0.0000003474 |
| 1 | 0.000001784  | -0.000000161 | -0.0000003406 |
| 1 | 0.000000678  | -0.000000064 | -0.000001792  |
| 1 | 0.000001067  | -0.000000598 | -0.0000002891 |
| 1 | 0.000000033  | -0.000000276 | -0.0000003295 |

|                                              |                             |
|----------------------------------------------|-----------------------------|
| Zero-point correction=                       | 1.100830 (Hartree/Particle) |
| Thermal correction to Energy=                | 1.170395                    |
| Thermal correction to Enthalpy=              | 1.171339                    |
| Thermal correction to Gibbs Free Energy=     | 0.981844                    |
| Sum of electronic and zero-point Energies=   | -3434.789073                |
| Sum of electronic and thermal Energies=      | -3434.719507                |
| Sum of electronic and thermal Enthalpies=    | -3434.718563                |
| Sum of electronic and thermal Free Energies= | -3434.908058                |

A-TSa11

|    |              |              |              |
|----|--------------|--------------|--------------|
| 6  | 0.000000198  | 0.000000038  | 0.000001115  |
| 6  | 0.000000624  | -0.000000579 | -0.000001809 |
| 7  | -0.000000198 | -0.000000195 | -0.000000823 |
| 7  | -0.00000112  | 0.000000568  | 0.000000783  |
| 16 | 0.000000431  | 0.000000641  | -0.000000424 |
| 8  | 0.000000432  | 0.000000413  | -0.000000485 |
| 8  | 0.00000036   | 0.000000136  | -0.00000028  |
| 6  | 0.00000043   | 0.000000217  | -0.000000679 |
| 6  | 0.000000267  | 0.000000578  | -0.000000727 |
| 6  | 0.000000338  | 0.000000497  | -0.000000797 |
| 6  | 0.000000228  | 0.000000859  | -0.000000759 |
| 6  | 0.000000463  | 0.000000628  | -0.000000723 |
| 6  | 0.000000509  | 0.000000383  | -0.000000423 |
| 1  | 0.000000497  | 0.000000737  | -0.000000764 |
| 1  | 0.00000062   | 0.000000868  | -0.00000101  |
| 1  | 0.000000402  | 0.000000034  | -0.000000611 |
| 1  | 0.000000254  | 0.000000224  | -0.000000275 |
| 6  | 0.000000481  | 0.000000818  | -0.000000892 |
| 1  | 0.000000831  | 0.000000544  | -0.000001018 |
| 1  | 0.000000497  | 0.000001061  | -0.000001161 |
| 1  | 0.00000032   | 0.000000669  | -0.000000701 |
| 6  | -0.000000217 | 0.000000674  | -0.000000086 |
| 6  | -0.000000176 | 0.000000264  | -0.000000349 |
| 1  | -0.000000268 | 0.000000554  | -0.000000497 |
| 1  | -0.000000216 | 0.000000457  | -0.000000363 |
| 6  | -0.000000569 | 0.000000887  | -0.000000517 |
| 1  | -0.000000222 | 0.000000655  | -0.000000475 |
| 1  | -0.000000357 | 0.000000328  | -0.000000233 |
| 6  | -0.000000557 | 0.000000698  | -0.000000531 |
| 1  | -0.000000733 | 0.00000066   | -0.000000339 |
| 1  | -0.00000037  | 0.000000883  | -0.000000683 |
| 1  | -0.000000743 | 0.00000091   | -0.000000575 |
| 1  | -0.000000451 | 0.000000843  | -0.000000553 |
| 1  | -0.000000696 | 0.00000066   | -0.000000335 |
| 6  | -0.000000679 | 0.000000182  | 0.000000004  |
| 6  | -0.000000796 | 0.000000275  | -0.000000002 |
| 1  | -0.000000833 | 0.000000322  | -0.000000011 |
| 1  | -0.000000788 | 0.000000254  | 0.000000275  |
| 6  | -0.000001024 | 0.000000207  | 0.000000167  |
| 1  | -0.000000774 | 0.000000398  | 0.000000078  |
| 1  | -0.000000666 | 0.000000143  | 0.000000171  |
| 6  | -0.00000115  | 0.000000293  | 0.000000216  |
| 1  | -0.000001193 | 0.00000014   | 0.000000371  |
| 1  | -0.000001214 | 0.00000039   | 0.000000121  |

|    |              |              |              |
|----|--------------|--------------|--------------|
| 1  | -0.000001347 | 0.000000305  | 0.000000244  |
| 1  | -0.000001074 | 0.00000039   | 0.000000024  |
| 1  | -0.000001031 | 0.000000103  | 0.000000307  |
| 16 | -0.000000044 | 0.000000083  | 0.000000076  |
| 8  | 0.000000002  | -0.000000045 | -0.000000119 |
| 8  | -0.000000876 | 0.000000108  | 0.000000278  |
| 6  | -0.000000754 | 0.000000584  | -0.000000241 |
| 6  | -0.000000153 | 0.000000524  | -0.000000295 |
| 6  | -0.000000739 | 0.000000387  | -0.000000077 |
| 6  | -0.000000541 | 0.000000819  | -0.000000455 |
| 1  | -0.000000229 | 0.000000505  | -0.000000423 |
| 6  | -0.000001091 | 0.000000555  | -0.000000414 |
| 1  | -0.000000899 | 0.000000338  | 0.000000056  |
| 6  | -0.000000802 | 0.000000747  | -0.000000499 |
| 1  | -0.000000426 | 0.000000881  | -0.000000659 |
| 1  | -0.000001081 | 0.000000692  | -0.000000214 |
| 6  | -0.000000845 | 0.000000982  | -0.000000592 |
| 1  | -0.000001036 | 0.000001166  | -0.000000498 |
| 1  | -0.000000777 | 0.000000908  | -0.000000592 |
| 1  | -0.000000822 | 0.000001133  | -0.000000866 |
| 79 | 0.000000392  | -0.000000094 | 0.000000318  |
| 6  | 0.000000492  | -0.000000437 | 0.000000165  |
| 6  | 0.000000429  | -0.000000561 | 0.000000341  |
| 6  | 0.000000543  | -0.000000627 | 0.000000231  |
| 1  | 0.000000626  | -0.000000845 | 0.000000594  |
| 1  | 0.000000678  | -0.000000543 | 0.000000196  |
| 7  | 0.000000379  | -0.000000288 | -0.000000086 |
| 7  | 0.000000081  | -0.000000712 | 0.000000421  |
| 6  | 0.000000534  | 0.00000035   | -0.000000473 |
| 6  | 0.000000697  | -0.000000476 | -0.000000024 |
| 6  | 0.000000614  | -0.000000109 | -0.000000003 |
| 6  | 0.000000228  | 0.000000345  | -0.000000206 |
| 6  | 0.000000917  | 0.000000047  | -0.000000336 |
| 6  | 0.000000549  | 0.000000203  | -0.000000692 |
| 1  | 0.000000203  | 0.000000248  | -0.00000024  |
| 1  | 0.000000975  | 0.000000112  | -0.000000423 |
| 1  | 0.000000639  | 0.000000331  | -0.000000542 |
| 6  | 0.000000166  | -0.000000875 | 0.000000703  |
| 6  | 0.000000326  | -0.000000736 | 0.000000736  |
| 6  | -0.000000161 | -0.000000767 | 0.000000555  |
| 6  | 0.000000339  | -0.000000858 | 0.000000697  |
| 6  | -0.00000007  | -0.000000558 | 0.000000963  |
| 6  | 0.000000117  | -0.000000956 | 0.000000976  |
| 1  | 0.000000426  | -0.000000808 | 0.000000539  |

|   |              |              |              |
|---|--------------|--------------|--------------|
| 1 | -0.000000193 | -0.000000784 | 0.000000685  |
| 1 | -0.000000018 | -0.000000097 | 0.000000891  |
| 6 | 0.000000464  | -0.000000577 | 0.000000231  |
| 6 | 0.000001023  | -0.000000914 | 0.000000312  |
| 6 | 0.000000773  | -0.000000584 | 0.000000287  |
| 1 | 0.000000818  | -0.000000731 | 0.000000309  |
| 1 | 0.000000865  | -0.000001003 | 0.000000607  |
| 1 | 0.000001035  | -0.000000918 | 0.000000506  |
| 1 | 0.000000781  | -0.000001084 | 0.000000783  |
| 1 | 0.000000578  | -0.000000508 | 0.000000135  |
| 1 | 0.000000063  | -0.000000705 | 0.000000349  |
| 1 | 0.000000824  | -0.000000621 | 0.000000213  |
| 6 | -0.000000079 | -0.000000072 | 0.000000409  |
| 6 | -0.000000005 | -0.000000467 | 0.000000684  |
| 6 | -0.000000123 | -0.000000789 | 0.000000796  |
| 1 | 0.000000027  | -0.000000514 | 0.000000726  |
| 1 | -0.000000135 | -0.000000529 | 0.000000067  |
| 1 | -0.000000508 | -0.000000422 | 0.000000607  |
| 1 | -0.000000547 | -0.000000424 | 0.000000827  |
| 1 | -0.000000007 | -0.000000869 | 0.000000811  |
| 1 | -0.000000309 | -0.000000892 | 0.000000956  |
| 1 | -0.000000259 | -0.000000741 | 0.000000811  |
| 6 | 0.000000848  | -0.000000369 | -0.000000022 |
| 6 | 0.000001057  | -0.000000143 | -0.000000249 |
| 6 | 0.000001182  | -0.000000329 | -0.000000016 |
| 1 | 0.000000848  | -0.000000356 | 0.000000014  |
| 1 | 0.000000998  | -0.000000032 | -0.000000438 |
| 1 | 0.000001173  | -0.000000232 | -0.000000211 |
| 1 | 0.000001229  | -0.000000098 | -0.000000487 |
| 1 | 0.000001098  | -0.000000306 | -0.000000085 |
| 1 | 0.000001299  | -0.000000252 | -0.000000262 |
| 1 | 0.000001328  | -0.000000451 | -0.000000007 |
| 6 | 0.000000102  | -0.000000023 | 0.000000214  |
| 6 | 0.000000078  | -0.000000117 | 0.000000001  |
| 6 | -0.000000069 | 0.000000041  | 0.000000166  |
| 1 | -0.000000013 | -0.000000151 | -0.000000012 |
| 1 | 0.000000301  | -0.000000219 | 0.000000144  |
| 1 | -0.000000046 | -0.000000158 | 0.000000199  |
| 1 | 0.000000004  | 0.000000014  | -0.000000113 |
| 1 | -0.000000346 | 0.000000193  | -0.000000161 |
| 1 | -0.000000178 | 0.000000277  | -0.000000118 |
| 1 | -0.000000327 | 0.000000014  | 0.000000031  |
| 6 | -0.000000046 | -0.000000239 | 0.000000361  |
| 6 | -0.000000087 | -0.000000423 | 0.000000506  |

|                                              |              |              |                             |
|----------------------------------------------|--------------|--------------|-----------------------------|
| 6                                            | -0.000000154 | -0.000000643 | 0.000000615                 |
| 6                                            | -0.000000413 | -0.000000463 | 0.000000846                 |
| 6                                            | -0.000000432 | -0.000000387 | 0.000000417                 |
| 1                                            | -0.000000177 | -0.000000629 | 0.000000597                 |
| 1                                            | 0.000000014  | -0.000000265 | 0.000000023                 |
| 7                                            | -0.00000013  | -0.000000343 | 0.000000584                 |
| 8                                            | -0.000000888 | -0.00000016  | 0.000000573                 |
| 1                                            | -0.000000629 | -0.000000522 | 0.000000734                 |
| 1                                            | 0.000000135  | -0.000000424 | 0.000000265                 |
| 17                                           | -0.000000663 | -0.00000045  | 0.00000058                  |
| Zero-point correction=                       |              |              | 1.185334 (Hartree/Particle) |
| Thermal correction to Energy=                |              |              | 1.261707                    |
| Thermal correction to Enthalpy=              |              |              | 1.262651                    |
| Thermal correction to Gibbs Free Energy=     |              |              | 1.060336                    |
| Sum of electronic and zero-point Energies=   |              |              | -4217.726151                |
| Sum of electronic and thermal Energies=      |              |              | -4217.649778                |
| Sum of electronic and thermal Enthalpies=    |              |              | -4217.648834                |
| Sum of electronic and thermal Free Energies= |              |              | -4217.851150                |

#### A-11a

|    |              |              |              |
|----|--------------|--------------|--------------|
| 6  | 0.0000001    | -0.000007936 | 0.000003804  |
| 6  | -0.000003982 | 0.000000305  | -0.000000939 |
| 7  | -0.000000607 | 0.000005234  | 0.000001156  |
| 7  | 0.00000641   | -0.000002369 | -0.000002758 |
| 16 | -0.000000974 | -0.00000328  | 0.000000362  |
| 8  | 0.000001498  | -0.000000865 | -0.000000656 |
| 8  | 0.0000021    | 0.000002015  | -0.000000121 |
| 6  | -0.000001826 | 0.000001514  | 0.000000139  |
| 6  | 0.000000267  | -0.000000225 | 0.000000936  |
| 6  | 0.000001663  | -0.000000262 | 0.000001056  |
| 6  | -0.000000239 | 0.000001295  | 0.000001201  |
| 6  | -0.00000091  | -0.000000552 | -0.000000377 |
| 6  | 0.000001784  | -0.000000518 | -0.00000119  |
| 1  | -0.000000563 | 0.000000395  | -0.000000456 |
| 1  | -0.000000116 | 0.000000164  | 0.000000313  |
| 1  | 0.00000062   | 0.000000357  | 0.000000928  |
| 1  | 0.000000355  | 0.000000468  | 0.000001172  |
| 6  | 0.000000046  | 0.000001015  | 0.000000807  |
| 1  | 0.000001021  | -0.000001371 | 0.000000474  |
| 1  | -0.000000437 | 0.000000546  | 0.000000102  |
| 1  | 0.000001116  | 0.000000056  | 0.000001938  |
| 6  | -0.000000513 | -0.000000437 | 0.000000068  |
| 6  | -0.000000674 | 0.000000851  | 0.000000239  |
| 1  | -0.000000739 | 0.000000483  | 0.000000045  |

|    |              |              |              |
|----|--------------|--------------|--------------|
| 1  | -0.000000411 | 0.000000976  | 0.000000545  |
| 6  | -0.000000567 | 0.000000653  | -0.000000047 |
| 1  | -0.000000724 | 0.000000572  | -0.000000004 |
| 1  | -0.000000703 | 0.000000323  | -0.000000582 |
| 6  | -0.000001936 | 0.000001113  | 0.000000218  |
| 1  | -0.000001182 | 0.000000986  | 0.000000248  |
| 1  | -0.000000808 | 0.000000709  | 0.000000118  |
| 1  | -0.000001629 | 0.000000733  | -0.000000079 |
| 1  | -0.00000137  | 0.000000285  | -0.000000622 |
| 1  | -0.000001362 | 0.000000826  | -0.000000037 |
| 6  | -0.000000755 | 0.000001545  | -0.000000065 |
| 6  | -0.000000849 | 0.000001277  | 0.000000819  |
| 1  | 0            | 0.000000564  | 0.000001623  |
| 1  | 0.000000191  | 0.000001346  | 0.000000799  |
| 6  | -0.000000815 | 0.000000843  | 0.000001071  |
| 1  | -0.000000637 | 0.000000013  | 0.000000508  |
| 1  | -0.000000237 | 0.000000923  | 0.000001008  |
| 6  | -0.000001113 | 0.000000765  | 0.00000005   |
| 1  | -0.000000457 | 0.000000827  | 0.000001091  |
| 1  | -0.000000705 | 0.000001272  | 0.000001043  |
| 1  | -0.000001176 | 0.000001208  | 0.000000762  |
| 1  | -0.000001247 | 0.000001113  | 0.000000658  |
| 1  | -0.000001075 | 0.000000964  | 0.000000425  |
| 16 | -0.000002172 | 0.000002945  | 0.000003882  |
| 8  | 0.000000272  | -0.000000587 | 0.000001418  |
| 8  | 0.000000802  | 0.000000514  | 0.000001096  |
| 6  | 0.000000076  | -0.000000285 | 0.00000208   |
| 6  | 0.000000339  | 0.000001186  | 0.000001425  |
| 6  | -0.000000072 | 0.000001124  | 0.00000143   |
| 6  | 0.000000382  | 0.000001034  | 0.000000956  |
| 1  | -0.00000007  | 0.000000148  | 0.000000831  |
| 6  | -0.00000006  | 0.000001267  | 0.000002728  |
| 1  | 0.000000061  | 0.000000984  | 0.000001653  |
| 6  | 0.000000243  | 0.000000511  | 0.000001998  |
| 1  | 0.000000092  | 0.000001048  | 0.000001299  |
| 1  | 0.000000242  | 0.000001412  | 0.000002088  |
| 6  | 0.000000229  | 0.000000811  | 0.000001844  |
| 1  | -0.000000055 | 0.000001306  | 0.000001902  |
| 1  | 0.000000035  | 0.000002145  | 0.000002211  |
| 1  | -0.000000264 | 0.000001518  | 0.000002616  |
| 79 | 0.000000843  | 0.000001312  | -0.000003315 |
| 6  | -0.000001131 | -0.000001763 | 0.000000437  |
| 6  | 0.000001539  | 0.000000363  | 0.000000174  |
| 6  | -0.000001171 | -0.000002758 | -0.000000412 |

|   |              |              |              |
|---|--------------|--------------|--------------|
| 1 | 0.000000549  | -0.00000076  | -0.000001823 |
| 1 | -0.000000765 | -0.000000736 | -0.000001922 |
| 7 | 0.000000274  | -0.000001595 | -0.000002122 |
| 7 | 0.000001378  | 0.00000052   | -0.000000272 |
| 6 | -0.000000922 | 0.000000538  | -0.000000488 |
| 6 | -0.000001887 | -0.00000099  | -0.000002834 |
| 6 | -0.000001594 | 0.000000406  | -0.00000068  |
| 6 | -0.000000901 | 0.000000294  | -0.000000895 |
| 6 | -0.000000748 | -0.000000138 | -0.000001727 |
| 6 | -0.000001008 | -0.000000197 | -0.000000733 |
| 1 | -0.000001419 | 0.000000425  | -0.000000876 |
| 1 | -0.00000051  | -0.000000201 | -0.000001577 |
| 1 | -0.000001416 | 0.000000092  | -0.00000114  |
| 6 | 0.000001437  | -0.000001131 | -0.000001135 |
| 6 | -0.000000107 | -0.000001154 | 0.000000273  |
| 6 | -0.000001227 | -0.000000189 | -0.000001018 |
| 6 | 0.00000126   | -0.000001518 | -0.000000591 |
| 6 | 0.000001393  | -0.000000149 | 0.00000016   |
| 6 | 0.000001011  | -0.000000709 | -0.000000435 |
| 1 | 0.000001298  | -0.000000958 | -0.000000297 |
| 1 | 0.000001474  | -0.000000688 | -0.000000283 |
| 1 | 0.000001469  | -0.000000904 | 0.000000146  |
| 6 | 0.000001549  | -0.000000528 | -0.000000873 |
| 6 | -0.000000268 | -0.000001416 | -0.000001921 |
| 6 | 0.000001353  | -0.000001126 | 0.000000483  |
| 1 | 0.000001195  | -0.000001248 | -0.000000788 |
| 1 | 0.000000862  | -0.000001177 | -0.000001338 |
| 1 | 0.000001077  | -0.000001416 | -0.000001058 |
| 1 | 0.000002071  | -0.000001366 | -0.00000077  |
| 1 | 0.000000415  | -0.000000072 | -0.000001045 |
| 1 | 0.000001176  | -0.000000976 | -0.000000771 |
| 1 | 0.000000925  | -0.000001071 | -0.000000724 |
| 6 | 0.000000574  | -0.000000314 | -0.000001859 |
| 6 | 0.000001126  | -0.000000364 | -0.000000149 |
| 6 | 0.00000121   | -0.000000283 | -0.000000613 |
| 1 | 0.00000025   | -0.000000251 | -0.000000434 |
| 1 | -0.000000108 | -0.000000428 | 0.000001155  |
| 1 | -0.000000075 | 0.000000199  | -0.000000369 |
| 1 | 0.000000115  | -0.000000348 | 0.0000001    |
| 1 | 0.00000028   | -0.000001091 | -0.000000879 |
| 1 | 0.000000458  | -0.000000741 | -0.000000583 |
| 1 | -0.000000037 | -0.000000655 | -0.000000567 |
| 6 | -0.000000571 | -0.000001971 | -0.00000202  |
| 6 | 0.000000797  | 0.000000909  | -0.000001115 |



|    |              |              |              |
|----|--------------|--------------|--------------|
| 6  | -0.000000756 | -0.000000244 | -0.000001414 |
| 1  | 0.000000552  | -0.000000023 | -0.000001259 |
| 1  | -0.00000134  | -0.000000813 | -0.000001012 |
| 1  | -0.000000349 | -0.000000095 | -0.000001472 |
| 1  | -0.000000467 | -0.000001232 | -0.000001188 |
| 1  | -0.000000254 | -0.000000956 | -0.000001808 |
| 1  | -0.000000596 | -0.000000976 | -0.000001882 |
| 1  | -0.000000179 | -0.00000117  | -0.00000179  |
| 6  | -0.000001187 | 0.000000021  | 0.000000039  |
| 6  | -0.000000926 | -0.000000138 | -0.000000694 |
| 6  | -0.000000149 | 0.000000179  | -0.000000363 |
| 1  | -0.000000862 | -0.000000532 | -0.000001192 |
| 1  | -0.000000957 | -0.000000231 | -0.000001357 |
| 1  | -0.000000881 | -0.000000043 | -0.000001102 |
| 1  | -0.0000014   | -0.000000077 | -0.000001071 |
| 1  | -0.000000449 | 0.000000162  | -0.000000136 |
| 1  | -0.000001443 | 0.000000537  | -0.000000496 |
| 1  | -0.000000645 | 0.000000183  | -0.00000057  |
| 6  | 0.000001319  | -0.000000492 | 0.000002929  |
| 6  | 0.000001376  | -0.000000741 | 0.000000372  |
| 6  | 0.000001199  | 0.000000608  | -0.000000234 |
| 6  | 0.000001424  | 0.000000076  | 0.000002142  |
| 6  | 0.000000975  | -0.000000927 | 0.00000054   |
| 1  | 0.000001783  | -0.000000375 | 0.000000731  |
| 1  | 0.000000823  | -0.000000019 | 0.000000434  |
| 7  | -0.00000058  | 0.000000851  | -0.000002925 |
| 8  | 0.000001255  | 0.000003045  | 0.000001851  |
| 1  | 0.000001037  | -0.000000245 | 0.000000959  |
| 1  | 0.000001272  | -0.000000524 | 0.000000737  |
| 17 | -0.000000234 | -0.000000589 | 0.000001093  |

Zero-point correction=

1.187481 (Hartree/Particle)

Thermal correction to Energy=

1.263502

Thermal correction to Enthalpy=

1.264446

Thermal correction to Gibbs Free Energy=

1.062292

Sum of electronic and zero-point Energies=

-4217.745411

Sum of electronic and thermal Energies=

-4217.669390

Sum of electronic and thermal Enthalpies=

-4217.668446

Sum of electronic and thermal Free Energies=

-4217.870600

A-TSa1

|   |              |              |              |
|---|--------------|--------------|--------------|
| 6 | 0.000001235  | -0.000000642 | -0.000000195 |
| 6 | -0.000000683 | 0.000000805  | -0.000000165 |
| 7 | -0.000000217 | -0.000000262 | -0.000000011 |
| 7 | 0.00000002   | 0.000000822  | 0.000000895  |

|    |              |              |              |
|----|--------------|--------------|--------------|
| 16 | 0.000000241  | -0.000000698 | -0.000000731 |
| 8  | -0.000000148 | -0.000000223 | 0.000000038  |
| 8  | 0.000000204  | 0.000000011  | -0.000000044 |
| 6  | 0.000000083  | 0.000000075  | -0.000000103 |
| 6  | 0.000000035  | -0.000000346 | -0.000000147 |
| 6  | 0.000000218  | -0.000000631 | -0.000000483 |
| 6  | -0.000000727 | 0.000000656  | -0.000000681 |
| 6  | 0.000000531  | -0.000000134 | -0.000000227 |
| 6  | 0.000000729  | -0.000000115 | -0.000000371 |
| 1  | 0.000000066  | -0.000000234 | -0.000000466 |
| 1  | 0.000000286  | -0.000000382 | -0.000000421 |
| 1  | 0.000000374  | -0.000000398 | -0.000000067 |
| 1  | 0.000000408  | -0.000000161 | -0.000000011 |
| 6  | 0.000000959  | -0.000001408 | -0.000000622 |
| 1  | 0.000000461  | -0.000000285 | 0.000000203  |
| 1  | 0.000000277  | -0.000000554 | 0.000000409  |
| 1  | 0.000001012  | 0.000000429  | -0.000000382 |
| 6  | -0.000000418 | 0.000000006  | -0.000000426 |
| 6  | -0.000000314 | 0.000000166  | -0.000000344 |
| 1  | 0.000000052  | 0.000000035  | -0.000000562 |
| 1  | 0.000000134  | -0.000000134 | -0.000000014 |
| 6  | -0.000000358 | 0.000000125  | -0.000000378 |
| 1  | -0.000000209 | 0            | -0.000000406 |
| 1  | -0.000000078 | 0.000000128  | -0.000000189 |
| 6  | -0.00000005  | 0.000000177  | -0.000000357 |
| 1  | -0.000000122 | 0.000000095  | -0.000000182 |
| 1  | -0.000000196 | 0.000000002  | -0.000000546 |
| 1  | -0.000000519 | 0.000000186  | -0.000000455 |
| 1  | -0.000000453 | 0.000000093  | -0.000000512 |
| 1  | -0.000000407 | 0.000000173  | -0.00000038  |
| 6  | 0.000000034  | -0.000000001 | -0.00000001  |
| 6  | 0.000000165  | -0.000000246 | 0.000000103  |
| 1  | 0.000000228  | 0.000000001  | 0.000000038  |
| 1  | 0.000000334  | -0.000000021 | 0.000000014  |
| 6  | 0.000000545  | -0.000000322 | 0.000000121  |
| 1  | 0.000000299  | -0.000000009 | 0.000000068  |
| 1  | 0.000000386  | -0.000000404 | -0.000000141 |
| 6  | 0.000000525  | -0.000000003 | 0.000000005  |
| 1  | 0.000000481  | -0.000000264 | 0.000000199  |
| 1  | 0.000000455  | -0.000000176 | 0.000000187  |
| 1  | 0.000000665  | -0.000000381 | 0.000000127  |
| 1  | 0.000000557  | -0.000000291 | -0.000000003 |
| 1  | 0.000000632  | -0.000000378 | -0.000000056 |
| 16 | -0.000000444 | -0.000000496 | -0.000000312 |

|    |              |              |              |
|----|--------------|--------------|--------------|
| 8  | -0.000000249 | 0.000000351  | -0.000000015 |
| 8  | 0.000000363  | -0.000000074 | 0.000000116  |
| 6  | -0.000000003 | 0.000000333  | -0.000000262 |
| 6  | 0.000000017  | 0.000000068  | -0.000000301 |
| 6  | 0.000000314  | 0.000000286  | -0.000000519 |
| 6  | -0.00000001  | -0.000000173 | -0.000000894 |
| 1  | -0.000000501 | 0.000000307  | -0.000000088 |
| 6  | -0.000000344 | 0.000000216  | 0.000000102  |
| 1  | -0.000000585 | -0.000000316 | 0.000000392  |
| 6  | 0.000000581  | -0.000000328 | 0.000000998  |
| 1  | -0.000000453 | 0.000000181  | -0.000000049 |
| 1  | -0.000000378 | 0.00000001   | -0.000000416 |
| 6  | -0.00000108  | 0.000000496  | -0.000001171 |
| 1  | -0.000000697 | 0.000000234  | -0.000000359 |
| 1  | -0.000001091 | 0.000000658  | 0.000000122  |
| 1  | -0.000000668 | -0.000000175 | -0.000000806 |
| 79 | -0.000000159 | -0.000000111 | 0.000000122  |
| 6  | -0.000000087 | 0.000000091  | -0.000000003 |
| 6  | -0.000000047 | 0.000000122  | 0.000000383  |
| 6  | 0.000000007  | 0.000000205  | 0.00000042   |
| 1  | -0.000000006 | 0.000000144  | 0.000000591  |
| 1  | -0.000000199 | 0.000000229  | 0.000000413  |
| 7  | 0.00000011   | 0.000000095  | 0.000000347  |
| 7  | 0.000000304  | -0.000000083 | 0.000000669  |
| 6  | -0.000000571 | -0.000000095 | 0.00000024   |
| 6  | 0.00000003   | 0.000000312  | -0.00000016  |
| 6  | -0.000000539 | 0.000000034  | -0.000000049 |
| 6  | -0.000000022 | 0.000000151  | 0.00000001   |
| 6  | -0.000000484 | 0.000000197  | -0.000000067 |
| 6  | -0.000000387 | 0.000000063  | 0.000000015  |
| 1  | -0.000000151 | 0.000000101  | -0.00000014  |
| 1  | -0.000000466 | 0.000000264  | -0.000000008 |
| 1  | -0.000000407 | 0.000000191  | -0.000000182 |
| 6  | 0.00000003   | 0.000000171  | 0.00000036   |
| 6  | 0.000000074  | 0.000000125  | 0.000000406  |
| 6  | 0.000000146  | 0.000000011  | 0.00000024   |
| 6  | 0.000000121  | 0.000000048  | 0.000000421  |
| 6  | 0.00000007   | -0.000000025 | 0.000000568  |
| 6  | 0.000000198  | 0.000000142  | 0.00000005   |
| 1  | 0.000000091  | 0.000000096  | 0.000000517  |
| 1  | 0.000000402  | -0.000000085 | 0.000000519  |
| 1  | 0.000000328  | 0.000000044  | 0.000000587  |
| 6  | -0.000000132 | 0.000000269  | 0.000000531  |
| 6  | -0.000000061 | 0.000000316  | 0.00000072   |

|   |              |              |               |
|---|--------------|--------------|---------------|
| 6 | -0.000000141 | 0.000000175  | 0.000000353   |
| 1 | -0.000000047 | 0.000000119  | 0.000000428   |
| 1 | -0.000000112 | 0.000000242  | 0.000000626   |
| 1 | -0.000000227 | 0.000000362  | 0.000000634   |
| 1 | -0.00000018  | 0.000000281  | 0.000000718   |
| 1 | -0.000000134 | 0.000000206  | 0.000000436   |
| 1 | -0.000000233 | 0.000000242  | 0.000000429   |
| 1 | -0.000000193 | 0.000000193  | 0.000000447   |
| 6 | 0.000000324  | -0.000000059 | 0.000000262   |
| 6 | 0.000000403  | -0.000000188 | 0.000000335   |
| 6 | 0.000000402  | 0.000000002  | 0.000000586   |
| 1 | 0.000000089  | -0.000000049 | 0.000000344   |
| 1 | 0.000000442  | -0.000000123 | 0.000000159   |
| 1 | 0.000000484  | -0.000000244 | 0.000000189   |
| 1 | 0.000000321  | -0.000000211 | 0.000000277   |
| 1 | 0.000000286  | 0.000000033  | 0.000000579   |
| 1 | 0.000000443  | -0.000000095 | 0.000000583   |
| 1 | 0.000000416  | -0.000000102 | 0.000000458   |
| 6 | -0.000000349 | 0.000000281  | 0.000000115   |
| 6 | -0.0000004   | 0.000000281  | 0.0000001     |
| 6 | -0.000000461 | 0.000000462  | 0.000000195   |
| 1 | -0.000000205 | 0.000000173  | 0.000000135   |
| 1 | -0.000000422 | 0.000000346  | 0.000000088   |
| 1 | -0.000000499 | 0.000000252  | 0.000000052   |
| 1 | -0.000000545 | 0.000000255  | 0.000000046   |
| 1 | -0.000000363 | 0.000000268  | 0.000000317   |
| 1 | -0.000000494 | 0.000000433  | 0.000000091   |
| 1 | -0.000000591 | 0.000000434  | 0.000000365   |
| 6 | -0.000000001 | 0.000000018  | 0.000000088   |
| 6 | -0.000000025 | 0.000000011  | 0.000000124   |
| 6 | 0.000000133  | -0.000000265 | 0.000000024   |
| 1 | 0.000000066  | 0.000000056  | 0.000000298   |
| 1 | -0.000000043 | 0.000000137  | 0.000000299   |
| 1 | 0.000000134  | -0.000000032 | 0.000000227   |
| 1 | -0.0000001   | 0.000000111  | 0.000000066   |
| 1 | 0.000000066  | -0.00000009  | -0.000000018  |
| 1 | -0.00000009  | 0.00000008   | -0.000000068  |
| 1 | 0.000000242  | -0.000000098 | 0.000000015   |
| 6 | 0.000000127  | -0.000000108 | -0.0000000645 |
| 6 | -0.000000064 | -0.000000065 | -0.000000537  |
| 6 | -0.000000176 | -0.00000019  | -0.000000904  |
| 6 | 0.000000117  | -0.000000402 | -0.000000682  |
| 6 | 0.000000212  | -0.000000408 | -0.000000526  |
| 1 | -0.000000071 | -0.000000178 | -0.000000787  |

|                                              |              |              |                             |
|----------------------------------------------|--------------|--------------|-----------------------------|
| 1                                            | -0.000000445 | 0.000000277  | -0.000000765                |
| 7                                            | 0.000001242  | 0.000000284  | -0.000000053                |
| 8                                            | -0.000000211 | -0.000001877 | -0.000000155                |
| 1                                            | 0.000000025  | -0.000000314 | -0.000000068                |
| 1                                            | -0.000000202 | -0.000000015 | -0.000000553                |
| 17                                           | 0.000000366  | -0.000000184 | -0.000000366                |
| Zero-point correction=                       |              |              | 1.186071 (Hartree/Particle) |
| Thermal correction to Energy=                |              |              | 1.262100                    |
| Thermal correction to Enthalpy=              |              |              | 1.263044                    |
| Thermal correction to Gibbs Free Energy=     |              |              | 1.063843                    |
| Sum of electronic and zero-point Energies=   |              |              | -4217.721828                |
| Sum of electronic and thermal Energies=      |              |              | -4217.645799                |
| Sum of electronic and thermal Enthalpies=    |              |              | -4217.644855                |
| Sum of electronic and thermal Free Energies= |              |              | -4217.844056                |

#### A-1a

|    |              |              |              |
|----|--------------|--------------|--------------|
| 6  | 0.000005125  | 0.000002087  | 0.000000437  |
| 6  | -0.000012891 | -0.000000803 | 0.000001564  |
| 7  | 0.000000742  | -0.000008372 | 0.000008475  |
| 7  | 0.000003976  | 0.000001532  | -0.000008133 |
| 16 | -0.000004816 | 0.000011503  | -0.000004995 |
| 8  | 0.00000043   | -0.000002598 | -0.000002814 |
| 8  | 0.000000132  | -0.000002342 | -0.000000419 |
| 6  | -0.00000228  | -0.000001693 | -0.000002122 |
| 6  | 0.000000084  | -0.000000837 | 0.000000824  |
| 6  | -0.000001274 | 0.000000226  | 0.000000437  |
| 6  | 0.000000204  | -0.000000399 | -0.000001583 |
| 6  | -0.000000144 | 0.00000151   | 0.000000047  |
| 6  | 0.000001327  | 0.000000402  | -0.000001604 |
| 1  | -0.000001081 | 0.000000581  | -0.000000577 |
| 1  | -0.000000964 | -0.000000175 | 0.000000063  |
| 1  | -0.000000205 | -0.000000492 | 0.000000115  |
| 1  | -0.000000686 | -0.000000608 | 0.000000637  |
| 6  | -0.00000071  | -0.000000559 | -0.000000002 |
| 1  | -0.000000283 | 0.000000119  | 0.000000187  |
| 1  | -0.000000637 | 0.000000201  | 0.000000078  |
| 1  | -0.000000481 | 0.00000004   | 0.000000262  |
| 6  | -0.000001441 | 0.000001083  | -0.000003632 |
| 6  | -0.000001238 | -0.000001143 | 0.000000747  |
| 1  | -0.00000105  | -0.000000347 | 0.000000158  |
| 1  | -0.000000176 | -0.000000742 | 0.000000231  |
| 6  | -0.000000857 | -0.000000219 | 0.000001149  |
| 1  | -0.000000498 | -0.000000154 | 0.000000175  |
| 1  | 0.000000014  | -0.000000495 | -0.000000579 |

|    |              |              |              |
|----|--------------|--------------|--------------|
| 6  | -0.000001242 | 0.000000416  | -0.000000841 |
| 1  | -0.000000189 | -0.000000347 | -0.000000175 |
| 1  | -0.000000067 | 0.000000163  | -0.000000166 |
| 1  | -0.000001107 | 0.000000218  | -0.000000144 |
| 1  | -0.000001175 | -0.000000399 | -0.000000021 |
| 1  | -0.000000913 | -0.000000129 | 0.000000168  |
| 6  | 0.000002058  | -0.000000699 | 0.000004316  |
| 6  | 0.000002272  | -0.000001338 | -0.000000057 |
| 1  | 0.000000486  | 0.000000014  | 0.000000166  |
| 1  | 0.000000585  | 0.000000037  | -0.000000708 |
| 6  | -0.00000004  | 0.000000005  | -0.000001608 |
| 1  | 0.000000144  | -0.000000168 | -0.000000079 |
| 1  | -0.000000239 | -0.000000082 | -0.000000047 |
| 6  | 0.00000192   | -0.000000756 | -0.000000253 |
| 1  | 0.000000909  | -0.000000672 | -0.000000184 |
| 1  | 0.000001375  | -0.000000358 | -0.000000167 |
| 1  | 0.000001174  | -0.000000496 | -0.000000549 |
| 1  | 0.000001243  | -0.000000679 | -0.000000721 |
| 1  | 0.000000737  | -0.000000647 | -0.000000879 |
| 16 | -0.000003541 | -0.000000709 | -0.000002144 |
| 8  | -0.000001047 | 0.000002196  | 0.000000379  |
| 8  | 0.000005841  | -0.000001299 | 0.000001482  |
| 6  | -0.000000507 | 0.000000489  | -0.000000254 |
| 6  | -0.000000743 | -0.000000973 | -0.000003816 |
| 6  | 0.000000706  | -0.000000195 | 0.000001197  |
| 6  | -0.00000112  | -0.000000599 | 0.000000784  |
| 1  | -0.00000011  | 0.000000089  | 0.000001665  |
| 6  | -0.000000725 | -0.000000657 | -0.000001406 |
| 1  | 0.000000159  | -0.00000138  | -0.000000978 |
| 6  | 0.000001097  | 0.000000024  | -0.000000297 |
| 1  | 0.000000134  | -0.000000234 | -0.000000214 |
| 1  | -0.000000146 | -0.000000045 | -0.000000755 |
| 6  | -0.000000584 | -0.000000611 | -0.000000665 |
| 1  | -0.000000711 | -0.000000161 | -0.000000469 |
| 1  | -0.000000525 | -0.000000513 | -0.000000649 |
| 1  | -0.000000301 | -0.000000311 | -0.000000144 |
| 79 | 0.000001306  | 0.000000118  | -0.000000822 |
| 6  | 0.000000029  | 0.000003778  | 0.000000074  |
| 6  | 0.000000999  | 0.000002146  | 0.000001065  |
| 6  | 0.000000127  | -0.000000482 | 0.000000775  |
| 1  | 0.000000529  | 0.000000524  | 0.00000009   |
| 1  | 0.000000093  | 0.00000168   | 0.000000192  |
| 7  | -0.000003439 | -0.000004235 | 0.000002017  |
| 7  | -0.000000588 | 0.000001471  | -0.000003488 |

|   |              |              |              |
|---|--------------|--------------|--------------|
| 6 | 0.000003945  | 0.000007684  | -0.000002207 |
| 6 | -0.000002316 | -0.000007935 | -0.000001477 |
| 6 | -0.000000251 | 0.000001162  | 0.000005967  |
| 6 | -0.000000604 | 0.000001762  | 0.000005894  |
| 6 | -0.000001382 | -0.000001672 | -0.000001071 |
| 6 | -0.000002325 | 0.000004244  | -0.000002175 |
| 1 | -0.000000973 | 0.000000294  | -0.000000153 |
| 1 | -0.000001471 | -0.000000295 | 0.000000225  |
| 1 | -0.000000918 | 0.000000497  | 0.000000509  |
| 6 | 0.000003528  | -0.000000835 | 0.000003267  |
| 6 | 0.000000437  | -0.000001072 | -0.000000441 |
| 6 | 0.000001482  | 0.000000266  | -0.000001724 |
| 6 | 0.00000151   | 0.000000406  | 0.000001359  |
| 6 | 0.000000126  | -0.000000605 | 0.000000166  |
| 6 | 0.000001743  | 0.000001261  | 0.000000322  |
| 1 | 0.000000974  | -0.000000191 | 0.000000457  |
| 1 | 0.000001639  | 0.000000191  | 0.000000349  |
| 1 | 0.000001354  | -0.000000032 | 0.000000283  |
| 6 | -0.000000361 | -0.000000006 | 0.000000641  |
| 6 | -0.000000331 | 0.000001111  | 0.000000076  |
| 6 | 0.000002033  | 0.000001832  | 0.000002646  |
| 1 | 0.000001201  | 0.000000156  | 0.000000515  |
| 1 | 0.000000071  | 0.000000924  | 0.000000653  |
| 1 | 0.000001147  | 0.000000314  | 0.000000691  |
| 1 | 0.000001409  | 0.000000471  | 0.000000582  |
| 1 | 0.000000358  | -0.000000878 | -0.000001142 |
| 1 | -0.000000099 | -0.000000192 | -0.000000547 |
| 1 | 0.00000009   | 0.000000234  | -0.000000665 |
| 6 | 0.000001029  | 0.000000266  | 0.00000194   |
| 6 | 0.000000213  | 0.000000257  | -0.000001129 |
| 6 | -0.000000083 | 0.000001018  | 0.000001564  |
| 1 | -0.000000427 | 0.000000093  | 0.000000112  |
| 1 | 0.000000333  | 0.000000554  | 0.000000301  |
| 1 | 0.000000671  | -0.000000124 | 0.000000708  |
| 1 | 0.000001022  | 0.000000028  | 0.000000593  |
| 1 | 0.000000097  | 0.000000477  | 0.000000028  |
| 1 | 0.000001128  | 0.000000069  | 0.000000237  |
| 1 | 0.000000825  | 0.000000469  | 0.00000004   |
| 6 | -0.000001825 | -0.000000655 | -0.000000928 |
| 6 | 0.000000083  | 0.000002149  | 0.000000444  |
| 6 | 0.000000508  | -0.000000035 | 0.000000948  |
| 1 | -0.000002163 | 0.000000938  | 0.000001462  |
| 1 | -0.000000051 | -0.000000409 | 0.00000004   |
| 1 | 0.000000028  | -0.000000257 | 0.000000429  |

|    |              |              |              |
|----|--------------|--------------|--------------|
| 1  | -0.000001154 | -0.000000832 | 0.000000507  |
| 1  | -0.000000213 | 0.000000662  | 0.000001192  |
| 1  | -0.000001593 | 0.000001713  | 0.000000814  |
| 1  | 0.000000351  | 0.000000676  | 0.000000674  |
| 6  | 0.000004566  | 0.000002636  | 0.000000238  |
| 6  | -0.000003932 | -0.000000421 | 0.000001869  |
| 6  | -0.000000966 | 0.000000244  | 0.000001068  |
| 1  | -0.000000325 | -0.000000478 | 0.000000087  |
| 1  | -0.000000358 | 0.000000594  | 0.000000748  |
| 1  | -0.000000425 | 0.000001065  | 0.000000535  |
| 1  | 0.000000127  | 0.000001163  | 0.000000052  |
| 1  | -0.000000548 | 0.000000029  | 0.000000369  |
| 1  | -0.000001135 | 0.000000053  | 0.000000589  |
| 1  | -0.000000036 | -0.000000253 | 0.000000441  |
| 6  | 0.000001988  | -0.000001467 | 0.000000073  |
| 6  | -0.000000115 | -0.000000905 | -0.000002646 |
| 6  | -0.000002466 | -0.000000042 | -0.000001231 |
| 6  | -0.000000338 | -0.000001215 | -0.000000412 |
| 6  | 0.000001649  | -0.000002118 | -0.000001142 |
| 1  | -0.000000062 | -0.000000894 | -0.000000748 |
| 1  | -0.000001358 | 0.000000056  | -0.00000102  |
| 7  | 0.000000788  | -0.00000148  | -0.000005452 |
| 8  | 0.00000293   | -0.000001482 | 0.00000367   |
| 1  | -0.000000037 | -0.000001306 | -0.000002237 |
| 1  | -0.000000877 | -0.00000127  | -0.000000372 |
| 17 | -0.000000236 | -0.000001062 | -0.00000137  |

Zero-point correction=

1.188169 (Hartree/Particle)

Thermal correction to Energy=

1.263975

Thermal correction to Enthalpy=

1.264920

Thermal correction to Gibbs Free Energy=

1.066709

Sum of electronic and zero-point Energies=

-4217.726774

Sum of electronic and thermal Energies=

-4217.650968

Sum of electronic and thermal Enthalpies=

-4217.650024

Sum of electronic and thermal Free Energies=

-4217.848234

A-TSa2

|    |              |             |             |
|----|--------------|-------------|-------------|
| 6  | 0.000000037  | 0.000000389 | 0.000000324 |
| 6  | -0.000000485 | 0.000000354 | 0.000000659 |
| 7  | 0.000000101  | 0.000000306 | 0.000000653 |
| 7  | -0.00000004  | 0.000000442 | 0.000000433 |
| 16 | -0.000000076 | 0.000000987 | 0.000000937 |
| 8  | 0.000000468  | 0.000001085 | 0.000001122 |
| 8  | -0.000000357 | 0.000000722 | 0.000000949 |
| 6  | 0.000000083  | 0.000000729 | 0.000000168 |



|    |              |              |             |
|----|--------------|--------------|-------------|
| 6  | 0.00000089   | 0.000001525  | 0.00000141  |
| 6  | 0.000000956  | 0.000000704  | 0.000001564 |
| 6  | 0.000000229  | 0.000000531  | -0.00000035 |
| 6  | 0.000000464  | 0.000000942  | 0.000000902 |
| 6  | 0.000000178  | 0.000000111  | 0.000001326 |
| 1  | 0.000000911  | 0.00000094   | 0.000001235 |
| 1  | 0.000001058  | 0.00000101   | 0.000001162 |
| 1  | 0.000000075  | 0.000000478  | 0.000000446 |
| 1  | -0.000000209 | 0.000000524  | 0.000000637 |
| 6  | 0.000001115  | 0.000000541  | 0.000000022 |
| 1  | 0.000001418  | 0.000001119  | 0.000000974 |
| 1  | 0.000001077  | -0.000000065 | 0.000001717 |
| 1  | 0.000001344  | 0.000000717  | 0.000001564 |
| 6  | 0.000000747  | 0.000000243  | 0.000000567 |
| 6  | 0.000001042  | 0.000000424  | 0.000000512 |
| 1  | 0.000000659  | 0.000000257  | 0.000000553 |
| 1  | 0.000000631  | 0.00000032   | 0.000000054 |
| 6  | 0.000001512  | 0.000000271  | 0.000000423 |
| 1  | 0.000001047  | 0.00000075   | 0.000000925 |
| 1  | 0.000000958  | 0.000000198  | 0.000000431 |
| 6  | 0.000001778  | 0.00000043   | 0.000000549 |
| 1  | 0.000001539  | 0.000000065  | 0.000000176 |
| 1  | 0.000001599  | 0.000000344  | 0.000000578 |
| 1  | 0.000002152  | 0.000000293  | 0.000000485 |
| 1  | 0.000001835  | 0.000000618  | 0.000000848 |
| 1  | 0.000001705  | 0.000000274  | 0.000000515 |
| 6  | -0.000001257 | 0.000000196  | 0.000000265 |
| 6  | -0.000001508 | 0.000000699  | 0.000000626 |
| 1  | -0.000001273 | 0.000000101  | 0.000000106 |
| 1  | -0.00000091  | 0.000000124  | 0.000000247 |
| 6  | -0.000001988 | 0.000000353  | 0.000000392 |
| 1  | -0.000001489 | 0.000000671  | 0.000000779 |
| 1  | -0.000001264 | 0.00000057   | 0.000000858 |
| 6  | -0.000001981 | 0.000000796  | 0.000000084 |
| 1  | -0.000001779 | 0.000000354  | 0.000000371 |
| 1  | -0.000001961 | 0.000000301  | 0.000000032 |
| 1  | -0.00000243  | 0.00000064   | 0.00000007  |
| 1  | -0.000002268 | 0.000000833  | 0.000000902 |
| 1  | -0.000002015 | 0.000000853  | 0.000000948 |
| 16 | -0.000001089 | 0.000000439  | 0.000000478 |
| 8  | -0.000000968 | 0.000000058  | 0.000000133 |
| 8  | -0.000000675 | 0.000000625  | 0.000000891 |
| 6  | -0.000000169 | 0.000000521  | 0.000000426 |
| 6  | -0.000000096 | 0.000000275  | 0.000000147 |

|    |              |              |              |
|----|--------------|--------------|--------------|
| 6  | -0.000000114 | 0.000000614  | 0.000000573  |
| 6  | 0.000000203  | 0.000000329  | -0.000000081 |
| 1  | -0.000000502 | -0.000000189 | -0.000000273 |
| 6  | 0.000000327  | 0.000000139  | 0.000000623  |
| 1  | -0.000000153 | 0.000000611  | 0.000000759  |
| 6  | 0.000001234  | -0.000000436 | 0.000000178  |
| 1  | 0.000000476  | -0.000000491 | -0.000000374 |
| 1  | 0.000000542  | 0.000000238  | 0.000000563  |
| 6  | 0.000000791  | -0.000000298 | -0.00000004  |
| 1  | 0.000001174  | -0.000000129 | -0.000000476 |
| 1  | 0.000000944  | 0.000000042  | 0.000000453  |
| 1  | 0.000000487  | -0.000000182 | -0.000000105 |
| 79 | 0.000000164  | -0.000000196 | -0.000000007 |
| 6  | -0.000000337 | -0.000000082 | -0.000000278 |
| 6  | -0.000000203 | -0.000000904 | -0.000001152 |
| 6  | -0.000000136 | -0.000000889 | -0.000001163 |
| 1  | -0.000000505 | -0.000001237 | -0.000001441 |
| 1  | 0.000000285  | -0.000001205 | -0.000001433 |
| 7  | 0.000000383  | -0.000000655 | -0.000000834 |
| 7  | -0.000000045 | -0.000000648 | -0.000000731 |
| 6  | 0.000001132  | -0.000000393 | -0.000000785 |
| 6  | 0.000000548  | -0.000000667 | -0.000001153 |
| 6  | 0.000001191  | -0.000000959 | -0.000000928 |
| 6  | 0.000001279  | -0.000000048 | -0.000000678 |
| 6  | 0.000001408  | -0.000000688 | -0.000000633 |
| 6  | 0.000001414  | -0.00000005  | -0.000000794 |
| 1  | 0.00000126   | -0.000000397 | -0.000000529 |
| 1  | 0.00000165   | -0.000000532 | -0.000000564 |
| 1  | 0.000001878  | -0.000000465 | -0.000000048 |
| 6  | -0.000000962 | -0.000000689 | -0.000000779 |
| 6  | -0.000001001 | -0.000000958 | -0.000000584 |
| 6  | -0.000001147 | -0.000000398 | -0.000000677 |
| 6  | -0.000001481 | -0.000000489 | -0.000000915 |
| 6  | -0.000001769 | -0.000000517 | -0.000000696 |
| 6  | -0.000001741 | -0.000000464 | -0.000000433 |
| 1  | -0.000001656 | -0.000000465 | -0.000000761 |
| 1  | -0.000001757 | -0.000000304 | -0.000000534 |
| 1  | -0.00000211  | -0.000000308 | -0.000000518 |
| 6  | -0.000000705 | -0.000000804 | -0.000000993 |
| 6  | -0.000000851 | -0.00000105  | -0.000001281 |
| 6  | -0.000000871 | -0.000000482 | -0.000000085 |
| 1  | -0.000000372 | -0.000000609 | -0.000000963 |
| 1  | -0.00000067  | -0.00000101  | -0.000001479 |
| 1  | -0.00000059  | -0.000001044 | -0.000001353 |

|   |              |              |              |
|---|--------------|--------------|--------------|
| 1 | -0.000001178 | -0.000001061 | -0.000001363 |
| 1 | -0.000000893 | -0.000000357 | -0.000000413 |
| 1 | -0.000001224 | -0.000000593 | -0.000000729 |
| 1 | -0.000000643 | -0.000000534 | -0.000000737 |
| 6 | -0.000001041 | -0.000000365 | -0.000000836 |
| 6 | -0.000001015 | -0.000000221 | -0.000000164 |
| 6 | -0.000001276 | -0.000000652 | -0.000000927 |
| 1 | -0.000000678 | -0.000000513 | -0.000000712 |
| 1 | -0.000000741 | -0.000000101 | -0.000000193 |
| 1 | -0.000000936 | -0.000000232 | -0.000000356 |
| 1 | -0.000001542 | -0.000000083 | -0.000000361 |
| 1 | -0.000001215 | -0.000000945 | -0.000001196 |
| 1 | -0.000001634 | -0.000000736 | -0.000000908 |
| 1 | -0.00000116  | -0.000000725 | -0.000000968 |
| 6 | 0.000001001  | -0.000000717 | -0.000000796 |
| 6 | 0.000001229  | -0.000000599 | -0.000000842 |
| 6 | 0.000001137  | -0.000001138 | -0.000001362 |
| 1 | 0.000000606  | -0.000000797 | -0.000000896 |
| 1 | 0.000001088  | -0.000000348 | -0.000000333 |
| 1 | 0.000001038  | -0.000000698 | -0.000000788 |
| 1 | 0.000001446  | -0.000000638 | -0.000000678 |
| 1 | 0.000000843  | -0.000001188 | -0.000001498 |
| 1 | 0.000001304  | -0.000001142 | -0.000001466 |
| 1 | 0.000000965  | -0.000001181 | -0.000001392 |
| 6 | 0.000000526  | -0.000000566 | -0.000000597 |
| 6 | 0.000000501  | -0.000000776 | -0.000000847 |
| 6 | 0.000000398  | -0.000000269 | -0.000000157 |
| 1 | -0.000000331 | -0.000000804 | -0.000000521 |
| 1 | 0.000000455  | -0.000000935 | -0.000001167 |
| 1 | 0.000000226  | -0.000000746 | -0.000000911 |
| 1 | 0.000000806  | -0.00000072  | -0.000000765 |
| 1 | 0.000000209  | 0.000000188  | -0.00000019  |
| 1 | 0.000000605  | -0.00000019  | -0.000000247 |
| 1 | 0.000000085  | -0.000000288 | -0.000000024 |
| 6 | 0.00000017   | 0.00000101   | 0.000001126  |
| 6 | 0.00000051   | 0.000001047  | 0.000001252  |
| 6 | 0.000000248  | 0.000001308  | 0.000001547  |
| 6 | -0.000000002 | 0.000001393  | 0.000001687  |
| 6 | -0.000000371 | 0.000001154  | 0.000001525  |
| 1 | 0.000000493  | 0.000001454  | 0.000001851  |
| 1 | 0.000000323  | 0.00000047   | 0.000000802  |
| 7 | -0.000000174 | 0.000000934  | 0.000001185  |
| 8 | -0.000000384 | 0.000000896  | 0.000000595  |
| 1 | -0.000000178 | 0.000001625  | 0.000002014  |

|                                              |              |             |                             |
|----------------------------------------------|--------------|-------------|-----------------------------|
| 1                                            | 0.00000076   | 0.000000956 | 0.000001271                 |
| 17                                           | -0.000000751 | 0.000001301 | 0.000001665                 |
| Zero-point correction=                       |              |             | 1.186315 (Hartree/Particle) |
| Thermal correction to Energy=                |              |             | 1.261798                    |
| Thermal correction to Enthalpy=              |              |             | 1.262742                    |
| Thermal correction to Gibbs Free Energy=     |              |             | 1.064664                    |
| Sum of electronic and zero-point Energies=   |              |             | -4217.729005                |
| Sum of electronic and thermal Energies=      |              |             | -4217.653522                |
| Sum of electronic and thermal Enthalpies=    |              |             | -4217.652577                |
| Sum of electronic and thermal Free Energies= |              |             | -4217.850656                |

A-2a

|    |              |              |              |
|----|--------------|--------------|--------------|
| 6  | 0.000001452  | -0.000003693 | -0.000001491 |
| 6  | -0.000002695 | 0.000005608  | 0.000001691  |
| 7  | -0.000000067 | 0.000001692  | 0.000001579  |
| 7  | 0.000000686  | -0.000003763 | -0.000002018 |
| 16 | -0.000000717 | -0.000000215 | 0.000000635  |
| 8  | 0.000002146  | 0.000002288  | -0.000000054 |
| 8  | 0.000001074  | 0.000000296  | 0.000000565  |
| 6  | 0.000000003  | 0.000001725  | 0.000000118  |
| 6  | 0.000000636  | 0.000001654  | -0.000000063 |
| 6  | 0.000000948  | 0.000000749  | -0.000000701 |
| 6  | 0.000000239  | 0.000000325  | 0.000000185  |
| 6  | -0.000000785 | 0.000000641  | -0.000000106 |
| 6  | 0.000000338  | -0.000001207 | 0.000000088  |
| 1  | 0.000000804  | 0.000001346  | -0.000000405 |
| 1  | 0.000001027  | 0.000000572  | -0.000000772 |
| 1  | -0.000000347 | -0.000000431 | 0.000000268  |
| 1  | -0.000000364 | 0.000000484  | 0.000000851  |
| 6  | 0.000000126  | -0.000000181 | -0.000000345 |
| 1  | 0.000000103  | -0.000000573 | -0.000000432 |
| 1  | 0.000000025  | -0.000000207 | -0.000000285 |
| 1  | 0.000000032  | -0.000000337 | -0.000000081 |
| 6  | 0.000001042  | 0.000000786  | -0.000000078 |
| 6  | 0.000001333  | 0.000000774  | -0.000000954 |
| 1  | 0.000000387  | 0.000000806  | -0.000000883 |
| 1  | 0.000000507  | 0.000000463  | -0.000000696 |
| 6  | 0.000001536  | 0.000000954  | -0.000002476 |
| 1  | 0.000001254  | 0.000001211  | -0.000000962 |
| 1  | 0.000000981  | 0.000000852  | -0.000001149 |
| 6  | 0.000001636  | 0.000000952  | -0.000001876 |
| 1  | 0.000001409  | 0.000000063  | -0.000001858 |
| 1  | 0.000001589  | 0.000001081  | -0.000001864 |
| 1  | 0.000002147  | 0.000000901  | -0.000002478 |

|    |              |              |              |
|----|--------------|--------------|--------------|
| 1  | 0.000002176  | 0.00000164   | -0.000001815 |
| 1  | 0.000001829  | 0.000001314  | -0.00000195  |
| 6  | -0.000001246 | 0.00000274   | 0.000002391  |
| 6  | -0.000001512 | -0.000001111 | 0.000000871  |
| 1  | -0.000001065 | -0.000000703 | 0.00000157   |
| 1  | -0.00000067  | 0.000000452  | -0.00000033  |
| 6  | -0.000000901 | -0.000000251 | 0.000001838  |
| 1  | -0.000001267 | 0.000000037  | 0.000002522  |
| 1  | -0.000001155 | 0.000001062  | 0.000001884  |
| 6  | -0.00000182  | -0.000000599 | 0.000001876  |
| 1  | -0.00000095  | -0.000000622 | 0.000000968  |
| 1  | -0.000001201 | -0.000000949 | 0.000001601  |
| 1  | -0.000001579 | -0.000000952 | 0.000001994  |
| 1  | -0.000001734 | -0.000000434 | 0.000002381  |
| 1  | -0.000001397 | -0.000000302 | 0.000001743  |
| 16 | -0.000000084 | 0.000002082  | 0.000003832  |
| 8  | -0.000001601 | 0.000002583  | 0.000000636  |
| 8  | -0.000001015 | 0.000001549  | 0.00000127   |
| 6  | 0.000000155  | 0.000000809  | 0.000001461  |
| 6  | -0.000001101 | 0.000001571  | 0.000002992  |
| 6  | -0.000000692 | 0.000001553  | 0.000001404  |
| 6  | -0.000000849 | 0.000001621  | 0.000002269  |
| 1  | -0.000000872 | 0.000000545  | 0.000002059  |
| 6  | 0.000000096  | 0.00000267   | 0.000002408  |
| 1  | 0.000000336  | 0.000002493  | 0.000001428  |
| 6  | -0.000000165 | 0.000002253  | 0.000001458  |
| 1  | -0.000000445 | 0.000001188  | 0.000002195  |
| 1  | 0.000000695  | 0.000002754  | 0.000001642  |
| 6  | -0.000000503 | 0.000003037  | 0.000002297  |
| 1  | -0.000000018 | 0.000001957  | 0.000001998  |
| 1  | 0.000000324  | 0.000002442  | 0.000001306  |
| 1  | -0.000000173 | 0.000002514  | 0.000002149  |
| 79 | -0.000000585 | -0.000003225 | 0.000000261  |
| 6  | 0.00000255   | 0.0000043    | 0.00000022   |
| 6  | 0.000001066  | -0.000002208 | -0.000000615 |
| 6  | -0.000000492 | -0.000002374 | 0.000000128  |
| 1  | -0.000000211 | -0.000001266 | -0.000001153 |
| 1  | 0.000000171  | -0.000000573 | -0.000001561 |
| 7  | 0.000001686  | -0.000001367 | -0.000000219 |
| 7  | -0.000002447 | -0.000001404 | -0.000003136 |
| 6  | -0.000001198 | 0.000001372  | -0.000001043 |
| 6  | 0.000000761  | -0.000000441 | -0.000002321 |
| 6  | 0.000001823  | 0.000000124  | 0.000000026  |
| 6  | 0.000001989  | -0.000000487 | -0.000001334 |

|   |              |              |              |
|---|--------------|--------------|--------------|
| 6 | 0.000000927  | 0.000000599  | -0.000001014 |
| 6 | 0.00000145   | 0.000000979  | -0.00000216  |
| 1 | 0.000001566  | 0.000000393  | -0.000002916 |
| 1 | 0.000001352  | 0.000001805  | -0.000001    |
| 1 | 0.000002143  | 0.000001274  | -0.000001887 |
| 6 | -0.00000078  | -0.00000395  | 0.000003094  |
| 6 | 0.000000668  | 0.000000891  | 0.000000655  |
| 6 | -0.000003064 | -0.000003369 | -0.000002113 |
| 6 | -0.000002641 | -0.000002169 | 0.000000398  |
| 6 | 0.00000002   | -0.000001097 | -0.000000589 |
| 6 | -0.000002237 | -0.000003693 | 0.000000805  |
| 1 | -0.000001657 | -0.000000978 | 0.000002186  |
| 1 | -0.000001129 | -0.000001758 | 0.000000724  |
| 1 | -0.000001693 | -0.000001917 | 0.000000984  |
| 6 | -0.000000213 | -0.000001767 | -0.000001475 |
| 6 | -0.000002955 | -0.000000239 | 0.000002479  |
| 6 | 0.000000037  | 0.000000076  | 0.000002518  |
| 1 | -0.000000064 | -0.000000867 | 0.000001884  |
| 1 | -0.000001433 | -0.000001436 | 0.000000401  |
| 1 | -0.000001361 | -0.000001014 | 0.000000977  |
| 1 | -0.000001925 | -0.000002213 | 0.000001198  |
| 1 | -0.000001004 | -0.000000249 | 0.00000013   |
| 1 | -0.000002285 | -0.000000647 | 0.00000084   |
| 1 | -0.000001136 | 0.000000307  | 0.00000134   |
| 6 | 0.000001322  | -0.000001737 | -0.000000613 |
| 6 | -0.000001074 | -0.000001424 | -0.000000905 |
| 6 | -0.000001325 | -0.000002794 | -0.000000417 |
| 1 | 0.000000401  | -0.000002291 | -0.000000736 |
| 1 | -0.000000373 | -0.000001228 | -0.000000943 |
| 1 | -0.000000089 | -0.000001937 | -0.000001141 |
| 1 | -0.000000671 | -0.000002439 | -0.000000571 |
| 1 | -0.000000634 | -0.000002926 | -0.000001071 |
| 1 | -0.000000836 | -0.000002623 | -0.000001542 |
| 1 | -0.000000536 | -0.000002735 | -0.000001644 |
| 6 | -0.000000496 | 0.00000019   | -0.000000807 |
| 6 | 0.000000642  | 0.000001329  | 0.000000469  |
| 6 | 0.000000458  | 0.000000588  | -0.000000722 |
| 1 | -0.00000072  | 0.00000056   | 0.000000206  |
| 1 | 0.000000596  | 0.000001335  | -0.000000019 |
| 1 | 0.000000627  | 0.00000161   | 0.000000096  |
| 1 | 0.000000653  | 0.000000765  | 0.000000133  |
| 1 | 0.000000697  | 0.000000188  | -0.000000525 |
| 1 | 0.000000755  | 0.000001589  | -0.000000359 |
| 1 | 0.000000729  | 0.000000721  | 0.00000005   |

|   |             |              |              |
|---|-------------|--------------|--------------|
| 6 | 0.000002104 | -0.000001299 | -0.000000953 |
| 6 | 0.000000796 | -0.000001149 | -0.000002953 |
| 6 | 0.000000233 | -0.00000103  | -0.000002717 |
| 1 | 0.000001319 | -0.000001394 | -0.000001801 |
| 1 | 0.000001037 | -0.000001283 | -0.000002605 |
| 1 | 0.000000979 | -0.000001741 | -0.000002822 |
| 1 | 0.000001976 | -0.000000622 | -0.000003312 |
| 1 | 0.000001246 | -0.000000594 | -0.000001605 |
| 1 | 0.000001606 | -0.00000078  | -0.000002029 |
| 1 | 0.000000855 | -0.000001161 | -0.000002537 |
| 8 | 0.000000005 | 0.000002337  | 0.000003588  |

Zero-point correction= 1.106537 (Hartree/Particle)

|                                              |              |
|----------------------------------------------|--------------|
| Thermal correction to Energy=                | 1.176427     |
| Thermal correction to Enthalpy=              | 1.177371     |
| Thermal correction to Gibbs Free Energy=     | 0.990379     |
| Sum of electronic and zero-point Energies=   | -3510.033891 |
| Sum of electronic and thermal Energies=      | -3509.964001 |
| Sum of electronic and thermal Enthalpies=    | -3509.963057 |
| Sum of electronic and thermal Free Energies= | -3510.150049 |

#### A-TSf1

|    |              |              |              |
|----|--------------|--------------|--------------|
| 6  | -0.000000352 | 0.000000418  | 0.000000027  |
| 6  | 0.000000393  | -0.000000293 | 0.000000501  |
| 7  | 0.000000844  | -0.000001337 | -0.000000315 |
| 7  | 0.000000158  | -0.000000138 | 0.000001072  |
| 16 | 0.000000288  | -0.000000094 | 0.000000715  |
| 8  | 0.000000037  | -0.000000544 | 0.000000537  |
| 8  | 0.00000067   | 0.000000305  | 0.000000435  |
| 6  | 0.00000042   | -0.000001046 | 0.000001059  |
| 6  | 0.000000156  | -0.000001384 | 0.000000835  |
| 6  | 0.000000118  | -0.000001693 | 0.000001218  |
| 6  | 0.000000415  | -0.000001612 | 0.000001715  |
| 6  | 0.000000768  | -0.000001283 | 0.000001727  |
| 6  | 0.00000068   | -0.000000676 | 0.000001541  |
| 1  | -0.000000175 | -0.000001284 | 0.000000563  |
| 1  | -0.000000024 | -0.000002133 | 0.000001247  |
| 1  | 0.000001028  | -0.00000137  | 0.000002053  |
| 1  | 0.000000811  | -0.000000466 | 0.000001435  |
| 6  | 0.000000513  | -0.000002208 | 0.000002005  |
| 1  | 0.000000786  | -0.000002193 | 0.000002261  |
| 1  | 0.000000689  | -0.000002278 | 0.000002238  |
| 1  | 0.000000264  | -0.000002525 | 0.000002063  |
| 6  | -0.000000242 | -0.000000296 | -0.000000093 |
| 6  | -0.000000026 | -0.000001272 | -0.000000061 |

|    |              |              |              |
|----|--------------|--------------|--------------|
| 1  | -0.000000827 | 0.000000002  | -0.000000521 |
| 1  | -0.000000538 | -0.000000078 | -0.000000118 |
| 6  | -0.000000842 | -0.000001375 | -0.000000196 |
| 1  | -0.000000266 | -0.000000962 | -0.000000043 |
| 1  | -0.000000046 | -0.000001077 | 0.000000655  |
| 6  | -0.000001088 | -0.000001967 | -0.000000185 |
| 1  | -0.000001019 | -0.00000145  | -0.000000313 |
| 1  | -0.000001264 | -0.000001183 | -0.000000343 |
| 1  | -0.000001465 | -0.000002176 | -0.000000225 |
| 1  | -0.00000115  | -0.000001884 | -0.000000015 |
| 1  | -0.000000903 | -0.000002165 | 0.000000271  |
| 6  | 0.000000759  | -0.000000448 | 0.000000317  |
| 6  | 0.000000272  | -0.000001127 | 0.000001344  |
| 1  | 0.000000067  | -0.000000668 | 0.00000108   |
| 1  | 0.000000085  | -0.000000815 | 0.000001026  |
| 6  | 0.000000242  | -0.000001465 | 0.000000889  |
| 1  | 0.000000508  | -0.000001016 | 0.000001526  |
| 1  | 0.000000363  | -0.000001219 | 0.000000782  |
| 6  | 0.000000036  | -0.00000198  | 0.000001286  |
| 1  | -0.000000232 | -0.000001546 | 0.000000845  |
| 1  | 0.000000256  | -0.000001444 | 0.000001288  |
| 1  | -0.000000206 | -0.000002295 | 0.000001302  |
| 1  | 0.000000302  | -0.000002033 | 0.000001616  |
| 1  | -0.000000138 | -0.000002103 | 0.000001087  |
| 16 | 0.00000114   | -0.000000192 | 0.000001153  |
| 8  | 0.000001203  | -0.000000378 | 0.000001758  |
| 8  | 0.000001436  | 0.000000124  | 0.000001704  |
| 6  | 0.000001342  | 0.000000523  | 0.000001309  |
| 6  | 0.000001542  | 0.000000361  | 0.000001379  |
| 6  | 0.000001626  | 0.000000887  | 0.000001403  |
| 6  | 0.000001973  | 0.000001126  | 0.000001687  |
| 1  | 0.000001369  | 0.000000028  | 0.000001478  |
| 6  | 0.000001742  | 0.000000955  | 0.000001514  |
| 1  | 0.000001551  | 0.000001063  | 0.000001158  |
| 6  | 0.000001883  | 0.000001291  | 0.000001494  |
| 1  | 0.000001749  | 0.000000721  | 0.00000154   |
| 1  | 0.000001945  | 0.000001733  | 0.000001123  |
| 6  | 0.000002183  | 0.000001755  | 0.000001413  |
| 1  | 0.000001957  | 0.000001503  | 0.000001356  |
| 1  | 0.000002213  | 0.000002081  | 0.000001059  |
| 1  | 0.000002451  | 0.000001789  | 0.000001881  |
| 79 | -0.000000304 | 0.000000156  | 0.000000027  |
| 6  | -0.000000803 | 0.000000063  | 0.000000101  |
| 6  | -0.000000646 | 0.000000584  | -0.00000108  |



|   |              |              |              |
|---|--------------|--------------|--------------|
| 6 | -0.00000448  | 0.00000018   | -0.000001001 |
| 1 | -0.000000991 | -0.000000126 | -0.000001072 |
| 1 | -0.000000528 | 0.000000912  | -0.000001255 |
| 7 | 0.000000128  | 0.000001161  | -0.000000795 |
| 7 | -0.000000486 | 0.000000166  | -0.000000902 |
| 6 | -0.000000519 | 0.000000607  | -0.000000793 |
| 6 | -0.000000521 | 0.000001597  | -0.000001541 |
| 6 | 0.000000538  | 0.000001254  | -0.000000326 |
| 6 | 0            | 0.000001948  | -0.000001074 |
| 6 | 0.000000287  | 0.000001887  | -0.000000936 |
| 6 | -0.000000042 | 0.000001936  | -0.000000475 |
| 1 | -0.000000035 | 0.000002444  | -0.000001599 |
| 1 | 0.000000912  | 0.000002191  | -0.000000439 |
| 1 | 0.000000611  | 0.00000263   | -0.000001156 |
| 6 | -0.000001193 | -0.000000874 | -0.000000412 |
| 6 | -0.000000909 | -0.000000936 | -0.000000437 |
| 6 | -0.00000126  | -0.000000289 | -0.000000834 |
| 6 | -0.000000816 | -0.00000138  | -0.000000132 |
| 6 | -0.000001341 | -0.000001479 | -0.000000875 |
| 6 | -0.00000102  | -0.00000163  | -0.000000214 |
| 1 | -0.000000657 | -0.000001633 | 0.000000358  |
| 1 | -0.000001479 | -0.000001478 | -0.000000924 |
| 1 | -0.000001237 | -0.000001991 | -0.000000103 |
| 6 | 0.000000091  | -0.000000624 | -0.000000173 |
| 6 | -0.000000508 | -0.00000071  | -0.000000082 |
| 6 | -0.000000161 | -0.000000919 | 0.000000488  |
| 1 | -0.00000039  | -0.000000359 | 0.000000181  |
| 1 | -0.000000774 | -0.000000546 | -0.000000358 |
| 1 | -0.000000305 | -0.000000735 | 0.000000118  |
| 1 | -0.000000705 | -0.000001196 | 0.000000062  |
| 1 | 0.000000104  | -0.000000846 | 0.000000692  |
| 1 | -0.000000128 | -0.000001223 | 0.000000691  |
| 1 | 0.000000273  | -0.000000668 | 0.000000647  |
| 6 | -0.000001368 | -0.000000387 | -0.000001182 |
| 6 | -0.000001397 | -0.000000746 | -0.000001194 |
| 6 | -0.000001829 | -0.000000455 | -0.000001626 |
| 1 | -0.000000972 | -0.000000184 | -0.000001328 |
| 1 | -0.000001074 | -0.000000415 | -0.000001007 |
| 1 | -0.000001459 | -0.000000282 | -0.000001612 |
| 1 | -0.0000017   | -0.000000942 | -0.000001337 |
| 1 | -0.000001612 | -0.000000586 | -0.000001602 |
| 1 | -0.00000188  | -0.000000919 | -0.000001668 |
| 1 | -0.000001793 | -0.000000372 | -0.000001876 |
| 6 | 0.000000171  | 0.000001031  | -0.000000053 |

|   |              |              |              |
|---|--------------|--------------|--------------|
| 6 | 0.000000906  | 0.000001149  | 0.000000335  |
| 6 | 0.000000667  | 0.000001289  | -0.000000272 |
| 1 | 0.00000031   | 0.000000844  | -0.000000196 |
| 1 | 0.000001041  | 0.000001173  | -0.000000272 |
| 1 | 0.000001316  | 0.000001126  | 0.000000256  |
| 1 | 0.000000943  | 0.000001731  | 0.000000253  |
| 1 | 0.000000336  | 0.000001327  | -0.000000419 |
| 1 | 0.000000776  | 0.000001746  | -0.0000002   |
| 1 | 0.000000724  | 0.000001058  | 0.000000151  |
| 6 | -0.00000067  | 0.00000158   | -0.000001733 |
| 6 | -0.000000915 | 0.000001443  | -0.000002095 |
| 6 | -0.000000796 | 0.000001132  | -0.000001878 |
| 1 | -0.000000895 | 0.000000791  | -0.000001569 |
| 1 | -0.000000931 | 0.00000141   | -0.000001898 |
| 1 | -0.000001258 | 0.000001383  | -0.000002261 |
| 1 | -0.000000804 | 0.000001889  | -0.000002125 |
| 1 | -0.000000746 | 0.000001123  | -0.000001402 |
| 1 | -0.000000697 | 0.000001757  | -0.000001835 |
| 1 | -0.00000117  | 0.000001229  | -0.000002072 |
| 8 | 0.000000373  | 0.000000289  | 0.000000332  |
| 6 | 0.000000015  | 0.000001294  | -0.00000114  |
| 6 | 0.000000168  | 0.00000103   | -0.000001031 |
| 6 | 0.00000041   | 0.000001796  | -0.000000614 |
| 6 | 0.000000174  | 0.000002003  | -0.000001315 |
| 6 | -0.000000468 | 0.000001955  | -0.000001501 |
| 6 | -0.000000447 | 0.000001336  | -0.000001396 |
| 6 | 0.000000268  | -0.000000081 | 0.000000215  |
| 6 | 0.000000251  | 0.000001508  | -0.000000393 |
| 1 | 0.000000919  | 0.000001908  | -0.000001769 |
| 1 | 0.000000082  | 0.000002415  | -0.000001457 |
| 1 | -0.000000496 | 0.000001927  | -0.000001777 |
| 1 | -0.000000582 | 0.000001047  | -0.000001391 |
| 1 | -0.00000013  | 0.000000256  | -0.00000033  |
| 1 | 0.000001041  | 0.000000462  | -0.00000068  |
| 7 | -0.000000641 | 0.000001864  | 0.000000782  |
| 1 | 0.000000719  | 0.000001363  | 0.000000024  |

Zero-point correction=

1.238213 (Hartree/Particle)

Thermal correction to Energy=

1.314318

Thermal correction to Enthalpy=

1.315262

Thermal correction to Gibbs Free Energy=

1.120478

Sum of electronic and zero-point Energies=

-3873.689762

Sum of electronic and thermal Energies=

-3873.613658

Sum of electronic and thermal Enthalpies=

-3873.612713

Sum of electronic and thermal Free Energies=

-3873.807498

A-1f

|    |              |              |              |
|----|--------------|--------------|--------------|
| 6  | -0.000005114 | 0.000000727  | -0.000008657 |
| 6  | 0.000002637  | 0.000003838  | 0.000009703  |
| 7  | 0.000006149  | -0.000003074 | -0.000003082 |
| 7  | -0.000004701 | -0.000002069 | 0.000003348  |
| 16 | -0.000002841 | 0.000002998  | 0.000002762  |
| 8  | -0.000002316 | 0.000004844  | -0.000002269 |
| 8  | -0.000001973 | -0.000004765 | -0.000001477 |
| 6  | -0.000001416 | -0.000001307 | -0.000001343 |
| 6  | -0.000001361 | -0.000001222 | -0.000000066 |
| 6  | 0.000001096  | -0.000002063 | -0.000000303 |
| 6  | -0.000000695 | -0.000001578 | -0.000003355 |
| 6  | -0.000001178 | -0.000002495 | -0.000004172 |
| 6  | 0.000000462  | -0.000002632 | -0.000000946 |
| 1  | 0.000000203  | -0.000000546 | -0.000001101 |
| 1  | 0.000000463  | -0.000002397 | -0.000001459 |
| 1  | -0.000000915 | -0.000003009 | -0.000003972 |
| 1  | -0.000002372 | -0.000001111 | -0.000003191 |
| 6  | 0.000000042  | -0.000003214 | -0.000003388 |
| 1  | -0.000000199 | -0.000003905 | -0.0000003   |
| 1  | -0.000000559 | -0.000004523 | -0.000003056 |
| 1  | 0.000000515  | -0.000004186 | -0.000003197 |
| 6  | -0.000003486 | 0.000007875  | -0.000000155 |
| 6  | 0.000000524  | -0.000004312 | 0.000001386  |
| 1  | 0.000003085  | -0.000002677 | -0.000001772 |
| 1  | 0.000000494  | 0.000000668  | -0.000000001 |
| 6  | 0.000003176  | 0.000002201  | 0.000003066  |
| 1  | 0.000002701  | -0.000000433 | 0.000001447  |
| 1  | 0.000001688  | -0.000001114 | -0.000000028 |
| 6  | 0.000001912  | -0.000001996 | 0.000001483  |
| 1  | 0.000001685  | -0.000000697 | 0.000001189  |
| 1  | 0.000000584  | 0.000000603  | 0.000001964  |
| 1  | 0.000002589  | -0.000001333 | 0.00000156   |
| 1  | 0.000003029  | -0.000002018 | 0.000001183  |
| 1  | 0.000002314  | -0.000002075 | 0.000000831  |
| 6  | -0.000000383 | -0.000007223 | -0.000012191 |
| 6  | 0.000002086  | -0.000000565 | 0.000001694  |
| 1  | 0.000000159  | -0.000001501 | 0.000000062  |
| 1  | -0.000000222 | -0.000001435 | -0.000000241 |
| 6  | 0.00000435   | -0.000001677 | -0.000000671 |
| 1  | 0.000000215  | -0.00000382  | -0.000001769 |
| 1  | -0.000000021 | -0.000002749 | -0.000000283 |
| 6  | 0.000000013  | -0.000005829 | -0.000002329 |

|    |              |              |              |
|----|--------------|--------------|--------------|
| 1  | 0.000000871  | -0.00000262  | -0.000000803 |
| 1  | 0.000001548  | -0.000004111 | -0.000002429 |
| 1  | 0.000002232  | -0.00000397  | -0.000000583 |
| 1  | 0.000001762  | -0.000003969 | -0.000001615 |
| 1  | 0.000002331  | -0.000003109 | -0.000001    |
| 16 | 0.000004844  | -0.000005038 | -0.000011423 |
| 8  | -0.000002442 | -0.000002989 | -0.000007481 |
| 8  | -0.000004566 | 0.000002905  | 0.000006177  |
| 6  | -0.000000754 | 0.000004026  | -0.000004806 |
| 6  | -0.000003354 | -0.000002641 | -0.00000387  |
| 6  | -0.000003019 | -0.000000642 | -0.00000261  |
| 6  | -0.0000026   | -0.000001982 | -0.000002641 |
| 1  | -0.000000154 | -0.000002926 | -0.000002564 |
| 6  | -0.000002183 | -0.0000007   | -0.000004023 |
| 1  | -0.000002876 | 0.000000292  | -0.000003786 |
| 6  | -0.00000186  | -0.000001045 | -0.000003219 |
| 1  | -0.000001527 | -0.000002565 | -0.000003602 |
| 1  | -0.000003636 | 0.000000051  | -0.000004015 |
| 6  | -0.000002992 | -0.000001038 | -0.000004063 |
| 1  | -0.000002068 | -0.000001561 | -0.000003806 |
| 1  | -0.000003919 | -0.000000043 | -0.00000394  |
| 1  | -0.000003458 | -0.000001549 | -0.000005682 |
| 79 | -0.000001939 | -0.000000135 | 0.000003235  |
| 6  | 0.000003647  | 0.00000427   | 0.000005057  |
| 6  | -0.000002085 | 0.000001357  | 0.000000013  |
| 6  | 0.000003319  | 0.000001479  | 0.000001883  |
| 1  | 0.0000031    | -0.000000539 | 0.00000358   |
| 1  | 0.000001756  | 0.000000213  | 0.000003325  |
| 7  | -0.000000321 | 0.00000235   | -0.000002082 |
| 7  | -0.000000072 | -0.000004298 | 0.000002252  |
| 6  | -0.000002753 | 0.000001083  | 0.000001317  |
| 6  | -0.000001438 | 0.00000214   | 0.000000271  |
| 6  | -0.000000275 | 0.000005912  | -0.000000828 |
| 6  | -0.000000056 | 0.000004774  | 0.000002817  |
| 6  | -0.000002059 | 0.00000064   | -0.000002219 |
| 6  | -0.00000301  | 0.000001836  | 0.000001528  |
| 1  | -0.000000998 | 0.000004458  | 0.000001642  |
| 1  | -0.000003546 | 0.000002647  | 0.000000075  |
| 1  | -0.000002624 | 0.000003784  | 0.000000269  |
| 6  | 0.00000297   | -0.000006202 | 0.00000325   |
| 6  | -0.000002494 | -0.000001012 | -0.00000069  |
| 6  | 0.000005978  | 0.00001108   | 0.000000912  |
| 6  | 0.000004154  | 0.00000351   | 0.000001117  |
| 6  | -0.000001163 | -0.000004021 | -0.000001046 |

|   |              |              |              |
|---|--------------|--------------|--------------|
| 6 | 0.000004853  | -0.000006507 | 0.000006024  |
| 1 | 0.000003277  | -0.000002992 | 0.000001829  |
| 1 | 0.000003992  | -0.000000492 | 0.000002906  |
| 1 | 0.000003732  | -0.00000195  | 0.000002416  |
| 6 | 0.000002064  | -0.000003359 | 0.000003765  |
| 6 | 0.000003329  | -0.000002909 | 0.000000122  |
| 6 | 0.000001931  | -0.000002386 | 0.00000006   |
| 1 | 0.000000938  | -0.00000051  | 0.000003037  |
| 1 | 0.000002627  | -0.000000656 | 0.000000899  |
| 1 | 0.000002885  | -0.000002149 | 0.000001194  |
| 1 | 0.000002618  | -0.000002967 | 0.000002338  |
| 1 | 0.000001257  | -0.000002836 | -0.000001487 |
| 1 | 0.000002694  | -0.000003344 | -0.000001318 |
| 1 | 0.000002456  | -0.000003659 | -0.000000368 |
| 6 | 0.0000022    | -0.000002823 | 0.000000962  |
| 6 | 0.000000768  | 0.000001515  | 0.000006392  |
| 6 | 0.000000739  | 0.000001975  | 0.000005184  |
| 1 | 0.00000361   | 0.000002063  | 0.000001724  |
| 1 | 0.000001257  | 0.000001802  | 0.000002506  |
| 1 | 0.000001477  | 0.00000249   | 0.000003342  |
| 1 | 0.000002366  | 0.000001947  | 0.000002128  |
| 1 | 0.000002773  | 0.000001129  | 0.000004058  |
| 1 | 0.000005557  | 0.000000148  | 0.000004449  |
| 1 | 0.000002504  | 0.000001779  | 0.000005294  |
| 6 | -0.00000387  | 0.000000074  | 0.00000066   |
| 6 | 0.000000907  | 0.000001024  | 0.000000712  |
| 6 | 0.000001377  | -0.000000176 | -0.000000605 |
| 1 | 0.000000202  | -0.000000319 | 0.000000822  |
| 1 | -0.000000921 | 0.000000117  | -0.000000994 |
| 1 | -0.000001488 | -0.00000062  | -0.000002796 |
| 1 | -0.00000267  | 0.0000008    | -0.00000193  |
| 1 | 0.000000277  | 0.000001139  | 0.00000026   |
| 1 | -0.000001618 | 0.000000479  | 0.000000238  |
| 1 | -0.000000373 | -0.000000607 | -0.000000889 |
| 6 | 0.000004485  | 0.000000937  | 0.000000064  |
| 6 | -0.000003169 | 0.000003991  | 0.000005181  |
| 6 | -0.000001627 | 0.000004457  | 0.000005323  |
| 1 | 0.000002593  | 0.000003137  | 0.000002458  |
| 1 | 0.00000019   | 0.000003623  | 0.000002839  |
| 1 | 0.000000457  | 0.000004125  | 0.0000042    |
| 1 | 0.000000715  | 0.000003394  | 0.000002821  |
| 1 | -0.000001387 | 0.000004738  | 0.000001431  |
| 1 | -0.000000941 | 0.000006025  | 0.000002265  |
| 1 | -0.000000265 | 0.000004142  | 0.000003211  |

|   |              |              |              |
|---|--------------|--------------|--------------|
| 8 | -0.000004004 | -0.000006623 | -0.000006449 |
| 6 | 0.00000374   | 0.000003253  | 0.00000237   |
| 6 | -0.000000654 | 0.000001299  | 0.000003242  |
| 6 | -0.000006171 | 0.000003872  | -0.000003887 |
| 6 | -0.00000182  | 0.000001454  | 0.00000246   |
| 6 | 0.000000097  | 0.000006939  | 0.000001502  |
| 6 | -0.000007834 | 0.000005066  | 0.00000099   |
| 6 | -0.000005135 | 0.000009947  | -0.000002246 |
| 6 | -0.000003842 | -0.00000523  | 0.000005254  |
| 1 | -0.000001993 | 0.000003773  | -0.000000504 |
| 1 | -0.000003362 | 0.000005696  | 0.000001094  |
| 1 | -0.000002591 | 0.000005756  | 0.000001696  |
| 1 | -0.000001235 | 0.000003632  | 0.000000887  |
| 1 | 0.000001002  | 0.000000926  | -0.000000505 |
| 1 | -0.000002303 | 0.000000616  | -0.000001506 |
| 7 | -0.000002846 | 0.00000253   | -0.000008286 |
| 1 | -0.00000001  | 0.000003     | 0.00000331   |

|                                                     |                                    |
|-----------------------------------------------------|------------------------------------|
| <b>Zero-point correction=</b>                       | <b>1.239476 (Hartree/Particle)</b> |
| <b>Thermal correction to Energy=</b>                | <b>1.315602</b>                    |
| <b>Thermal correction to Enthalpy=</b>              | <b>1.316546</b>                    |
| <b>Thermal correction to Gibbs Free Energy=</b>     | <b>1.120438</b>                    |
| <b>Sum of electronic and zero-point Energies=</b>   | <b>-3873.699726</b>                |
| <b>Sum of electronic and thermal Energies=</b>      | <b>-3873.623600</b>                |
| <b>Sum of electronic and thermal Enthalpies=</b>    | <b>-3873.622656</b>                |
| <b>Sum of electronic and thermal Free Energies=</b> | <b>-3873.818764</b>                |

#### A-TSa3

|    |              |              |              |
|----|--------------|--------------|--------------|
| 6  | -0.000000754 | -0.000000949 | -0.000000371 |
| 6  | 0.000000389  | -0.000000645 | -0.000000692 |
| 7  | 0.000000078  | -0.000001614 | 0.000000647  |
| 7  | 0.000001383  | -0.000000707 | 0.000000042  |
| 16 | 0.000000163  | -0.000002546 | 0.000000046  |
| 8  | -0.000000154 | -0.000002628 | 0.000000979  |
| 8  | 0.000000705  | -0.000002012 | 0.000000001  |
| 6  | 0.000000328  | -0.000001799 | 0.000000426  |
| 6  | 0.000000059  | -0.000003014 | 0.000001316  |
| 6  | 0.000000001  | -0.000003323 | 0.000000497  |
| 6  | 0.000000369  | -0.000003869 | 0.000002097  |
| 6  | 0.000001865  | -0.000003061 | 0.000000277  |
| 6  | 0.000000777  | -0.000002775 | 0.000000106  |
| 1  | -0.000000052 | -0.000002873 | 0.000001179  |
| 1  | -0.000000208 | -0.000003208 | 0.000001318  |
| 1  | 0.000001645  | -0.000002978 | 0.000000076  |
| 1  | 0.000001316  | -0.000002486 | -0.000000045 |

|    |              |              |              |
|----|--------------|--------------|--------------|
| 6  | 0.000001371  | -0.000003668 | 0.00000003   |
| 1  | -0.000000971 | -0.000003847 | -0.000000354 |
| 1  | 0.000001876  | -0.000002504 | 0.00000022   |
| 1  | 0.000002009  | -0.000002842 | 0.000000766  |
| 6  | -0.00000079  | -0.000001332 | 0.000000982  |
| 6  | -0.000000888 | -0.000001158 | 0.0000008    |
| 1  | -0.000001169 | -0.000000869 | 0.00000091   |
| 1  | -0.000000857 | -0.000001704 | 0.000001067  |
| 6  | -0.000001484 | -0.000001143 | 0.000001407  |
| 1  | -0.000000783 | -0.000000567 | 0.000000954  |
| 1  | -0.000000489 | -0.000001281 | 0.000000849  |
| 6  | -0.000001633 | -0.000001012 | 0.00000138   |
| 1  | -0.00000153  | -0.000001676 | 0.000001517  |
| 1  | -0.000001931 | -0.000000924 | 0.000001364  |
| 1  | -0.000002155 | -0.000001093 | 0.000001705  |
| 1  | -0.000001689 | -0.000000441 | 0.000001264  |
| 1  | -0.000001387 | -0.000001308 | 0.000001309  |
| 6  | 0.00000086   | -0.000000499 | -0.000000189 |
| 6  | 0.000000617  | -0.000000938 | 0.000000101  |
| 1  | 0.000001024  | -0.000000129 | -0.000000568 |
| 1  | 0.000000127  | -0.000000534 | -0.000000101 |
| 6  | 0.000000319  | -0.000000559 | 0.000000012  |
| 1  | 0.000001032  | -0.000001295 | -0.0000002   |
| 1  | 0.000000435  | -0.000001533 | 0.000000077  |
| 6  | 0.000000226  | -0.000001047 | 0.000000227  |
| 1  | -0.00000003  | -0.000000039 | 0.000000084  |
| 1  | 0.000000633  | -0.000000298 | -0.000000332 |
| 1  | 0.000000024  | -0.000000777 | 0.000000255  |
| 1  | 0.000000661  | -0.000001374 | 0.00000003   |
| 1  | -0.000000041 | -0.000001447 | 0.000000472  |
| 16 | 0.000001967  | -0.000000849 | -0.000000824 |
| 8  | 0.000001948  | -0.000001041 | -0.000000753 |
| 8  | 0.000002054  | -0.000001783 | -0.000000712 |
| 6  | 0.00000232   | -0.000000771 | -0.000001659 |
| 6  | 0.000002064  | 0.000000407  | -0.000001214 |
| 6  | 0.000002522  | -0.000000546 | -0.000001192 |
| 6  | 0.000002938  | 0.000000312  | -0.000001644 |
| 1  | 0.000002221  | 0.000000097  | -0.000001344 |
| 6  | 0.000002282  | 0.000000163  | -0.00000156  |
| 1  | 0.000002324  | -0.000001066 | -0.000001034 |
| 6  | 0.000002941  | 0.000000135  | -0.000002351 |
| 1  | 0.000002741  | 0.00000079   | -0.000001934 |
| 1  | 0.000002988  | -0.000000447 | -0.000001607 |
| 6  | 0.000003788  | 0.000000928  | -0.000002835 |

|    |              |              |              |
|----|--------------|--------------|--------------|
| 1  | 0.000004271  | -0.000000043 | -0.000002335 |
| 1  | 0.000002886  | 0.000001204  | -0.000002387 |
| 1  | 0.000002778  | 0.000000859  | -0.000002206 |
| 79 | -0.000000148 | 0.000000133  | 0.000000285  |
| 6  | -0.000000832 | 0.000001304  | -0.000000309 |
| 6  | -0.000000456 | 0.000002382  | -0.000000054 |
| 6  | -0.000001    | 0.000002231  | -0.000000298 |
| 1  | -0.000000986 | 0.000002587  | -0.000000186 |
| 1  | -0.000000569 | 0.000002637  | -0.000000455 |
| 7  | -0.000000426 | 0.000001254  | -0.000000121 |
| 7  | -0.000000512 | 0.000001477  | -0.000000083 |
| 6  | -0.00000008  | 0.000001881  | -0.000000371 |
| 6  | -0.000000638 | 0.00000152   | 0.000000189  |
| 6  | 0.000000101  | 0.000001168  | -0.000000734 |
| 6  | -0.000000532 | 0.000001268  | -0.000000126 |
| 6  | 0.000000482  | 0.000001279  | -0.000000409 |
| 6  | 0.000000061  | 0.000001393  | -0.000000441 |
| 1  | -0.000000966 | 0.00000122   | 0.000000056  |
| 1  | 0.000000919  | 0.000000981  | -0.000000903 |
| 1  | 0.000000122  | 0.000001061  | -0.000000462 |
| 6  | -0.000001072 | 0.000001976  | 0.000000044  |
| 6  | -0.000000218 | 0.000001532  | 0            |
| 6  | -0.000001569 | 0.000001034  | 0.000000269  |
| 6  | -0.000000895 | 0.000001103  | -0.000000246 |
| 6  | -0.000001265 | 0.000000873  | 0.000000894  |
| 6  | -0.000001254 | 0.000001415  | 0.000000484  |
| 1  | -0.000000284 | 0.000001103  | -0.000000167 |
| 1  | -0.000001905 | 0.000000705  | 0.000001038  |
| 1  | -0.000001238 | 0.000000819  | 0.000000495  |
| 6  | 0.000000226  | 0.000001573  | -0.000000565 |
| 6  | 0.000000111  | 0.000002432  | -0.000000809 |
| 6  | 0.000000644  | 0.00000119   | -0.000000774 |
| 1  | 0.000000171  | 0.000001786  | -0.000000717 |
| 1  | -0.000000356 | 0.000002709  | -0.000000688 |
| 1  | 0.000000398  | 0.000002639  | -0.000001153 |
| 1  | -0.000000126 | 0.000002443  | -0.000000814 |
| 1  | 0.000000753  | 0.00000072   | -0.000000719 |
| 1  | 0.000000583  | 0.000001333  | -0.000000087 |
| 1  | 0.000001052  | 0.000001527  | -0.000001178 |
| 6  | -0.0000019   | 0.000000886  | 0.000000687  |
| 6  | -0.000002088 | 0.000000473  | 0.000001117  |
| 6  | -0.00000242  | 0.000001729  | 0.000000089  |
| 1  | -0.000001711 | 0.000001394  | 0.000000616  |
| 1  | -0.000001716 | 0.000000285  | 0.000000078  |



|   |              |              |              |
|---|--------------|--------------|--------------|
| 1 | -0.000002428 | 0.000000577  | 0.000001306  |
| 1 | -0.000002247 | 0.00000039   | 0.000001415  |
| 1 | -0.000002316 | 0.000002279  | 0.000000662  |
| 1 | -0.000002566 | 0.000001653  | 0.000001165  |
| 1 | -0.000002699 | 0.000001809  | 0.000001075  |
| 6 | 0.000000893  | 0.000001267  | -0.000001045 |
| 6 | 0.000001412  | 0.000001021  | -0.000001342 |
| 6 | 0.000000916  | 0.00000214   | -0.000001515 |
| 1 | 0.000000666  | 0.000001398  | -0.000000816 |
| 1 | 0.00000106   | 0.000000309  | -0.000000699 |
| 1 | 0.000001662  | 0.000000905  | -0.000001379 |
| 1 | 0.000001587  | 0.000000636  | -0.000001119 |
| 1 | 0.000000662  | 0.000002523  | -0.000001252 |
| 1 | 0.000001284  | 0.000002099  | -0.000001382 |
| 1 | 0.000001368  | 0.000002169  | -0.000001551 |
| 6 | -0.000001414 | 0.000001576  | 0.000000336  |
| 6 | -0.000001672 | 0.000002316  | 0.000000328  |
| 6 | -0.000001801 | 0.000001049  | 0.000000731  |
| 1 | -0.000001437 | 0.000001647  | 0.000000359  |
| 1 | -0.000001426 | 0.000002653  | -0.000000001 |
| 1 | -0.000002133 | 0.00000242   | 0.000000529  |
| 1 | -0.000001679 | 0.000002272  | 0.000000241  |
| 1 | -0.000001517 | 0.000000582  | 0.000000738  |
| 1 | -0.000001795 | 0.000000986  | 0.000000736  |
| 1 | -0.000002202 | 0.000001192  | 0.000001002  |
| 8 | 0.000001319  | -0.000001145 | -0.000000291 |
| 6 | -0.000000345 | -0.000001287 | 0.000000602  |
| 6 | -0.000000428 | -0.000000628 | 0.000000649  |
| 6 | -0.000001167 | -0.000000567 | 0.000000914  |
| 6 | -0.00000137  | -0.000001149 | 0.000001231  |
| 6 | -0.000001227 | -0.000001561 | 0.000001341  |
| 6 | -0.000000898 | -0.000001617 | 0.000001023  |
| 6 | 0.000000103  | -0.000001228 | 0.000000558  |
| 6 | 0.000000152  | -0.000000557 | -0.000000006 |
| 1 | -0.000001224 | -0.000000229 | 0.000000809  |
| 1 | -0.000001846 | -0.000001052 | 0.000001492  |
| 1 | -0.000001566 | -0.000001963 | 0.000001634  |
| 1 | -0.000000549 | -0.000002052 | 0.000001139  |
| 1 | 0.000000557  | -0.00000159  | 0.000000103  |
| 1 | 0.000000828  | -0.0000004   | -0.000000326 |
| 7 | -0.000000062 | -0.000000038 | 0.000000226  |
| 1 | -0.000000017 | 0.000000007  | -0.000000036 |

Zero-point correction=

1.239109 (Hartree/Particle)

Thermal correction to Energy=

1.315007

|                                              |              |
|----------------------------------------------|--------------|
| Thermal correction to Enthalpy=              | 1.315951     |
| Thermal correction to Gibbs Free Energy=     | 1.121159     |
| Sum of electronic and zero-point Energies=   | -3873.695299 |
| Sum of electronic and thermal Energies=      | -3873.619402 |
| Sum of electronic and thermal Enthalpies=    | -3873.618458 |
| Sum of electronic and thermal Free Energies= | -3873.813250 |

A-3a

|    |              |              |              |
|----|--------------|--------------|--------------|
| 6  | 0.000001479  | 0.000006239  | 0.000011205  |
| 6  | -0.00000389  | -0.000008778 | 0.000002306  |
| 7  | -0.000010735 | -0.000002855 | -0.000008779 |
| 7  | 0.000005411  | -0.000000552 | 0.000000955  |
| 16 | -0.000007706 | -0.000002315 | 0.000000462  |
| 8  | 0.000002564  | -0.000001363 | 0.000001481  |
| 8  | 0.000004278  | 0.000003002  | 0.000001808  |
| 6  | -0.00000076  | -0.00000075  | -0.000003048 |
| 6  | 0.000002535  | 0.000002504  | -0.000004816 |
| 6  | 0.000001097  | -0.000002914 | -0.000002583 |
| 6  | -0.000000508 | -0.000001663 | -0.000000382 |
| 6  | -0.000001118 | -0.000002842 | -0.000002419 |
| 6  | 0.000001645  | 0.000000417  | 0.000001196  |
| 1  | -0.000001805 | -0.000002489 | -0.000001235 |
| 1  | -0.000000091 | -0.000001322 | -0.000002181 |
| 1  | -0.000001187 | -0.000002196 | -0.000001036 |
| 1  | 0.000001029  | -0.000003976 | -0.000002153 |
| 6  | 0.000000155  | -0.000002592 | -0.000002038 |
| 1  | 0.000000133  | -0.000001547 | -0.000001674 |
| 1  | 0.000000057  | -0.000001714 | -0.000002318 |
| 1  | -0.000000212 | -0.000000509 | -0.000002083 |
| 6  | 0.000007813  | -0.000006125 | 0.00000117   |
| 6  | 0.000000899  | 0.000004773  | -0.000004692 |
| 1  | -0.000000685 | -0.000002335 | 0.000000308  |
| 1  | -0.00000208  | -0.000002382 | -0.000004559 |
| 6  | 0.000001087  | 0.000000287  | -0.000001229 |
| 1  | -0.00000191  | -0.000001231 | 0.000000682  |
| 1  | 0.000001151  | 0.000000909  | 0.000000016  |
| 6  | 0.000001436  | -0.000000704 | -0.000000006 |
| 1  | 0.000000594  | -0.000000955 | -0.000001813 |
| 1  | 0.000002117  | -0.000000625 | -0.000000008 |
| 1  | 0.000001404  | -0.000000218 | -0.000001061 |
| 1  | 0.000000322  | 0.000000705  | -0.000000672 |
| 1  | 0.000000757  | -0.000000548 | -0.000002101 |
| 6  | -0.000001904 | -0.000001895 | -0.000000028 |
| 6  | 0.000001115  | -0.000002616 | -0.000000377 |

|    |              |              |              |
|----|--------------|--------------|--------------|
| 1  | 0.00000142   | 0.000002339  | -0.000002913 |
| 1  | 0.000001528  | 0.000001708  | 0.000001135  |
| 6  | 0.000001805  | 0.000001487  | 0.000000563  |
| 1  | 0.000000071  | 0.000001218  | -0.000001267 |
| 1  | 0.000000509  | 0.000000325  | 0.00000022   |
| 6  | -0.000001108 | -0.000003513 | -0.000002595 |
| 1  | 0.000000436  | -0.000000587 | -0.000000964 |
| 1  | 0.000001736  | -0.000000439 | -0.000000653 |
| 1  | 0.000000055  | 0.000000303  | -0.000001264 |
| 1  | 0.000000518  | -0.000000257 | -0.000000041 |
| 1  | 0.00000149   | 0.000001001  | -0.000000898 |
| 16 | -0.000007033 | 0.000001115  | 0.000010222  |
| 8  | 0.000002188  | -0.00000242  | 0.000001162  |
| 8  | -0.000003633 | 0.000001682  | -0.000004061 |
| 6  | -0.000001451 | -0.000005233 | -0.00000068  |
| 6  | -0.000000254 | 0.000001037  | 0.000002563  |
| 6  | -0.000000882 | -0.000000087 | 0.000000611  |
| 6  | 0.000000816  | -0.000001076 | 0.000000094  |
| 1  | -0.0000007   | 0.000000091  | -0.000000146 |
| 6  | -0.000002375 | 0.000000772  | 0.000000723  |
| 1  | -0.000000677 | -0.000000057 | -0.000001675 |
| 6  | -0.000001398 | -0.000000082 | 0.000000303  |
| 1  | -0.000000501 | 0.000000513  | 0.000001681  |
| 1  | -0.000001798 | -0.000000382 | 0.000001451  |
| 6  | -0.000001969 | 0.000000263  | 0.000000008  |
| 1  | -0.000001181 | -0.000000059 | 0.000003462  |
| 1  | -0.000002243 | 0.000000875  | 0.000001754  |
| 1  | 0.000000085  | -0.00000004  | 0.000001729  |
| 79 | 0.00000827   | 0.000004152  | 0.000001812  |
| 6  | -0.00000636  | 0.000005214  | 0.000003705  |
| 6  | 0.00000249   | -0.000000663 | 0.000001741  |
| 6  | -0.000002296 | 0.000002005  | 0.000003328  |
| 1  | 0.000001732  | 0.000001858  | 0.000000075  |
| 1  | -0.000000834 | 0.000002552  | -0.000000297 |
| 7  | -0.000001655 | -0.000003609 | 0.000000913  |
| 7  | 0.000004066  | -0.000004158 | -0.000001906 |
| 6  | 0.00000266   | 0.000001706  | -0.000000431 |
| 6  | -0.000003738 | 0.000002194  | -0.000005579 |
| 6  | 0.000000674  | 0.00000507   | 0.000006721  |
| 6  | 0.000000089  | 0.00000414   | 0.000005122  |
| 6  | -0.00000267  | -0.000000515 | -0.000003063 |
| 6  | -0.000001036 | -0.00000587  | 0.000004961  |
| 1  | -0.00000051  | 0.00000144   | -0.000000559 |
| 1  | -0.000001921 | 0.000001112  | 0.000001742  |

|   |              |              |              |
|---|--------------|--------------|--------------|
| 1 | -0.000001272 | 0.000000572  | 0.00000121   |
| 6 | 0.000000772  | 0.000002683  | 0.000001026  |
| 6 | 0.0000024    | -0.000004783 | -0.000010999 |
| 6 | 0.000005836  | 0.000007046  | -0.000001526 |
| 6 | 0.000002248  | 0.000006062  | 0.000001998  |
| 6 | -0.000004074 | -0.000002864 | -0.000006169 |
| 6 | 0.000004659  | -0.000004109 | 0.000001072  |
| 1 | 0.00000035   | -0.000001831 | 0.000002013  |
| 1 | 0.000001113  | 0.000002132  | -0.000001493 |
| 1 | 0.000000697  | 0.00000186   | -0.00000079  |
| 6 | -0.000002716 | 0.000001885  | 0.000006484  |
| 6 | 0.000001033  | 0.000000829  | -0.000002797 |
| 6 | 0.000001936  | 0.000002533  | -0.000001816 |
| 1 | 0.000000669  | 0.000004041  | 0.000001103  |
| 1 | 0.000001167  | 0.000000773  | 0.000001844  |
| 1 | 0.00000182   | 0.000002239  | 0.000001     |
| 1 | -0.000000107 | 0.000002197  | 0.000001633  |
| 1 | 0.000000097  | 0.000003219  | 0.000001168  |
| 1 | 0.000003046  | -0.000000077 | 0.000003122  |
| 1 | -0.000001932 | 0.000001166  | 0.000000582  |
| 6 | 0.000005534  | 0.000000036  | 0.000000746  |
| 6 | -0.000000144 | -0.000001885 | 0.000000479  |
| 6 | 0.000000333  | 0.000000761  | -0.000000589 |
| 1 | -0.000001309 | 0.000001435  | 0.000002583  |
| 1 | 0.000002414  | -0.000000383 | -0.000000761 |
| 1 | 0.000000516  | 0.000000826  | -0.000000599 |
| 1 | 0.000001413  | 0.000000924  | 0.000000831  |
| 1 | 0.000001069  | 0.000001481  | -0.000000033 |
| 1 | 0.000000562  | 0.00000213   | -0.000000555 |
| 1 | 0.00000106   | 0.000001531  | 0.000000258  |
| 6 | -0.000005947 | -0.000007188 | 0.000003996  |
| 6 | 0.000005683  | 0.000000949  | -0.000000917 |
| 6 | 0.000000954  | 0.000005211  | -0.000000457 |
| 1 | 0.000000016  | 0.000001083  | -0.000001018 |
| 1 | -0.000003748 | -0.000002591 | 0.000000529  |
| 1 | -0.000002611 | 0.000002085  | -0.000000304 |
| 1 | -0.000001483 | 0.000000804  | 0.000002388  |
| 1 | -0.000001617 | 0.000000298  | 0.000002273  |
| 1 | -0.000001277 | -0.00000028  | 0.000002192  |
| 1 | -0.000000184 | 0.000001299  | 0.00000183   |
| 6 | 0.000002716  | -0.000000681 | 0.000000818  |
| 6 | -0.000001726 | -0.000000008 | 0.000001627  |
| 6 | -0.000000115 | -0.000000363 | 0.000000225  |
| 1 | -0.000000456 | 0.000000544  | 0.000000217  |

|   |              |              |              |
|---|--------------|--------------|--------------|
| 1 | -0.000000542 | 0.000000871  | 0.000001782  |
| 1 | 0.00000028   | 0.000001283  | 0.000000654  |
| 1 | 0.00000042   | 0.000000598  | 0.000001523  |
| 1 | 0.000000252  | 0.000001438  | -0.000000088 |
| 1 | -0.000000413 | -0.000000608 | -0.000000093 |
| 1 | -0.000000149 | 0.000000006  | 0.000000485  |
| 8 | 0.000002904  | 0.000000307  | 0.000000128  |
| 6 | 0.000002143  | 0.000001489  | -0.000001446 |
| 6 | -0.000002116 | 0.000000226  | 0.000002342  |
| 6 | 0.000000141  | -0.000000857 | 0.000002414  |
| 6 | -0.000000918 | -0.000001147 | -0.000000674 |
| 6 | 0.000000092  | 0.00000043   | 0.000000582  |
| 6 | 0.000001236  | -0.000001068 | 0.000001469  |
| 6 | -0.00000006  | 0.00000083   | -0.000013478 |
| 6 | -0.000007812 | -0.000007481 | 0.000005316  |
| 1 | -0.000001199 | -0.000000586 | 0.000000139  |
| 1 | -0.000000513 | -0.000001209 | -0.000001053 |
| 1 | -0.000000488 | -0.000001159 | -0.000000915 |
| 1 | 0.000000937  | -0.000001844 | -0.000000745 |
| 1 | -0.000006445 | -0.000002848 | -0.000005352 |
| 1 | -0.000002557 | -0.000000117 | -0.000000328 |
| 7 | 0.000006692  | -0.000002832 | -0.000004456 |
| 1 | -0.000001198 | -0.00000186  | -0.00000014  |

|                                              |                             |
|----------------------------------------------|-----------------------------|
| Zero-point correction=                       | 1.240256 (Hartree/Particle) |
| Thermal correction to Energy=                | 1.316279                    |
| Thermal correction to Enthalpy=              | 1.317223                    |
| Thermal correction to Gibbs Free Energy=     | 1.121458                    |
| Sum of electronic and zero-point Energies=   | -3873.702296                |
| Sum of electronic and thermal Energies=      | -3873.626273                |
| Sum of electronic and thermal Enthalpies=    | -3873.625329                |
| Sum of electronic and thermal Free Energies= | -3873.821095                |

#### A-TSa4

|    |              |              |              |
|----|--------------|--------------|--------------|
| 6  | -0.000001179 | -0.000000894 | -0.000000423 |
| 6  | -0.000000195 | -0.000001156 | 0.000000279  |
| 7  | 0.000000105  | -0.000000627 | 0.000000947  |
| 7  | -0.000000131 | -0.000000096 | -0.000000788 |
| 16 | 0.000000147  | -0.000000979 | 0.000000203  |
| 8  | 0.000000025  | -0.000001214 | 0.000001056  |
| 8  | -0.000000877 | -0.000001769 | 0.000000294  |
| 6  | 0.000000014  | -0.000001841 | 0.000000758  |
| 6  | 0.000000079  | -0.000001298 | 0.000001292  |
| 6  | 0.000000654  | -0.000000967 | 0.000001465  |
| 6  | 0.000000131  | -0.000001365 | 0.000001146  |

|    |              |              |              |
|----|--------------|--------------|--------------|
| 6  | -0.000000297 | -0.000001276 | 0.000001024  |
| 6  | -0.000000107 | -0.000001126 | 0.000000657  |
| 1  | 0.000000422  | -0.000000832 | 0.000001501  |
| 1  | 0.000000572  | -0.00000106  | 0.000001745  |
| 1  | -0.000000164 | -0.000001269 | 0.000000526  |
| 1  | -0.000000086 | -0.000000926 | 0.000000227  |
| 6  | 0.000000271  | -0.000001216 | 0.000001283  |
| 1  | 0.000000443  | -0.000000994 | 0.000001585  |
| 1  | 0.000000134  | -0.000001149 | 0.000001052  |
| 1  | 0.000000228  | -0.000001647 | 0.000001475  |
| 6  | 0.000000902  | -0.000000522 | 0.000000629  |
| 6  | 0.000000638  | -0.000000325 | 0.000001468  |
| 1  | -0.000000418 | 0.000000307  | 0.000000611  |
| 1  | 0.000000353  | -0.000000606 | 0.000001347  |
| 6  | 0.000000836  | -0.00000001  | 0.000001443  |
| 1  | 0.000000282  | -0.000000005 | 0.000000899  |
| 1  | 0.000000332  | -0.000000186 | 0.000000957  |
| 6  | 0.000001034  | 0.000000203  | 0.000001706  |
| 1  | 0.000000765  | -0.00000028  | 0.000001612  |
| 1  | 0.000000548  | 0.000000026  | 0.000001495  |
| 1  | 0.000001111  | 0.000000345  | 0.000001949  |
| 1  | 0.000000974  | 0.000000558  | 0.000001397  |
| 1  | 0.000000964  | 0.0000001    | 0.000001758  |
| 6  | 0.000000287  | 0.000000098  | -0.00000006  |
| 6  | 0.000000203  | -0.000000245 | 0.000000613  |
| 1  | -0.000000282 | 0.000000251  | 0.000000085  |
| 1  | 0.000000525  | -0.000000151 | 0.000000023  |
| 6  | 0.000000621  | 0.000000189  | 0.000000385  |
| 1  | 0.000000095  | -0.000000151 | 0.000000436  |
| 1  | 0.000000089  | -0.000000374 | 0.000000646  |
| 6  | 0.000000545  | 0.000000035  | 0.000001023  |
| 1  | 0.000000582  | 0.000000593  | 0.000000651  |
| 1  | 0.000000313  | 0.000000054  | 0.000000051  |
| 1  | 0.000000726  | 0.000000583  | 0.000001092  |
| 1  | 0.00000005   | 0.000000096  | 0.000000878  |
| 1  | 0.000000614  | 0.000000003  | 0.000001262  |
| 16 | -0.000000301 | -0.000000628 | -0.000000944 |
| 8  | -0.000000443 | -0.000000403 | -0.000000064 |
| 8  | -0.000000553 | -0.000000787 | -0.000000754 |
| 6  | -0.000000528 | -0.000000762 | -0.000000307 |
| 6  | -0.000000367 | 0.000000033  | -0.000000844 |
| 6  | -0.000000786 | -0.000000495 | -0.000001424 |
| 6  | -0.000001375 | 0.000001056  | -0.000001725 |
| 1  | -0.000000272 | 0.000000196  | -0.000000898 |

|    |              |              |              |
|----|--------------|--------------|--------------|
| 6  | -0.00000024  | -0.000000132 | -0.00000124  |
| 1  | -0.00000091  | -0.000000733 | -0.000001443 |
| 6  | -0.000000822 | 0.000000083  | -0.000001463 |
| 1  | -0.000000563 | 0.000000701  | -0.000001563 |
| 1  | -0.000001078 | -0.000000318 | -0.000001967 |
| 6  | -0.000000964 | 0.000000394  | -0.000002286 |
| 1  | -0.000001309 | 0.000000209  | -0.000001602 |
| 1  | -0.000000263 | 0.000000489  | -0.000002405 |
| 1  | -0.000001521 | 0.000000688  | -0.000002802 |
| 79 | 0.000000391  | 0.000000998  | 0.0000001    |
| 6  | 0.000000365  | 0.000000454  | 0.000001114  |
| 6  | 0.00000023   | 0.000001435  | -0.000000168 |
| 6  | 0.000000176  | 0.000001424  | -0.00000046  |
| 1  | 0.000000507  | 0.000001882  | -0.000000409 |
| 1  | 0.000000122  | 0.000001438  | -0.000000838 |
| 7  | 0.00000038   | 0.000001173  | -0.000000658 |
| 7  | 0.000000592  | 0.000001602  | -0.000000384 |
| 6  | -0.000001192 | 0.000000408  | -0.000001174 |
| 6  | -0.000000226 | 0.000000333  | -0.000000227 |
| 6  | -0.000000203 | 0.000000576  | -0.000001085 |
| 6  | -0.000000115 | 0.000000252  | -0.000000774 |
| 6  | -0.000000502 | 0.000000117  | -0.000000991 |
| 6  | -0.000000662 | 0.000000395  | -0.000001078 |
| 1  | -0.000000239 | 0.000000105  | -0.000000796 |
| 1  | -0.000000718 | 0.00000022   | -0.000001605 |
| 1  | -0.000000703 | -0.000000156 | -0.000001384 |
| 6  | 0.00000006   | 0.000000482  | -0.000000297 |
| 6  | 0.000000545  | 0.000001419  | 0.000000078  |
| 6  | 0.000000776  | 0.000001302  | 0.000000707  |
| 6  | 0.000000523  | 0.000001084  | 0.000000747  |
| 6  | 0.000001133  | 0.000001507  | 0.000000632  |
| 6  | 0.000001114  | 0.000001081  | 0.000000506  |
| 1  | 0.000000745  | 0.000001664  | 0.000000038  |
| 1  | 0.000001117  | 0.000001546  | 0.000001179  |
| 1  | 0.00000105   | 0.000001522  | 0.000001051  |
| 6  | 0.000000299  | 0.000001413  | -0.000000366 |
| 6  | 0.00000004   | 0.000001912  | -0.000000664 |
| 6  | 0.000000232  | 0.00000127   | -0.000000341 |
| 1  | 0.000000353  | 0.00000107   | -0.000000513 |
| 1  | 0.00000041   | 0.000001988  | -0.000000554 |
| 1  | 0.000000221  | 0.000001912  | -0.000000831 |
| 1  | 0.000000555  | 0.000002135  | -0.000000239 |
| 1  | 0.000000208  | 0.000000846  | -0.000000124 |
| 1  | 0.000000352  | 0.000001515  | -0.000000182 |

|   |              |              |              |
|---|--------------|--------------|--------------|
| 1 | 0.000000071  | 0.000001275  | -0.000000729 |
| 6 | 0.000000682  | 0.000001758  | 0.000000774  |
| 6 | 0.000000732  | 0.000000779  | 0.000000832  |
| 6 | 0.000001     | 0.000001595  | 0.000000804  |
| 1 | 0.000000268  | 0.000000937  | 0.000000489  |
| 1 | 0.000000917  | 0.000000279  | 0.000001342  |
| 1 | 0.000000776  | 0.000000728  | 0.000001234  |
| 1 | 0.000001001  | 0.000000749  | 0.000001129  |
| 1 | 0.000000971  | 0.000001748  | 0.00000062   |
| 1 | 0.000001035  | 0.000001682  | 0.000001016  |
| 1 | 0.000000985  | 0.000001579  | 0.0000009    |
| 6 | -0.000000236 | 0.00000078   | -0.00000112  |
| 6 | -0.000000462 | 0.000000343  | -0.000001219 |
| 6 | -0.000000544 | 0.00000094   | -0.000001878 |
| 1 | -0.000000384 | 0.000000581  | -0.000001158 |
| 1 | -0.000000683 | 0.000000097  | -0.000001017 |
| 1 | -0.000000645 | 0.000000441  | -0.000001419 |
| 1 | -0.000000681 | 0.000000085  | -0.00000158  |
| 1 | -0.000000421 | 0.000001238  | -0.000001602 |
| 1 | -0.000000826 | 0.000000744  | -0.00000188  |
| 1 | -0.000000551 | 0.000001113  | -0.000001728 |
| 6 | 0.000000069  | 0.000000336  | -0.000000013 |
| 6 | 0.000000104  | 0.000000657  | -0.00000026  |
| 6 | -0.00000014  | 0.000000153  | 0.000000257  |
| 1 | 0.000000365  | 0.00000089   | -0.000000185 |
| 1 | 0.00000005   | 0.000001074  | -0.000000637 |
| 1 | 0.000000342  | 0.000001023  | 0.000000033  |
| 1 | 0.000000108  | 0.000000576  | -0.000000498 |
| 1 | 0.000000186  | -0.00000042  | -0.000000099 |
| 1 | -0.000000023 | 0.000000054  | 0.000000092  |
| 1 | 0.000000375  | 0.00000031   | 0.000000383  |
| 8 | -0.000000413 | -0.00000008  | -0.000000718 |
| 6 | -0.000000505 | -0.000001356 | 0.000000127  |
| 6 | -0.000001071 | -0.000000881 | 0.000000653  |
| 6 | -0.000000122 | -0.000000448 | 0.000000031  |
| 6 | -0.000000163 | -0.000001392 | 0.000000184  |
| 6 | -0.000000727 | -0.000001369 | 0.000001049  |
| 6 | -0.000000196 | -0.000000266 | 0.000000083  |
| 6 | 0.000000993  | -0.000000765 | -0.00000055  |
| 6 | -0.000000982 | -0.000000507 | -0.000000642 |
| 1 | -0.000000252 | -0.000000943 | -0.000000307 |
| 1 | 0.000000013  | -0.000001402 | 0.000000392  |
| 1 | 0.00000016   | -0.000001415 | 0.000000099  |
| 1 | 0.000000381  | -0.000001014 | 0.000000699  |



|    |              |              |              |
|----|--------------|--------------|--------------|
| 1  | -0.000000083 | -0.000001232 | 0.000000107  |
| 1  | -0.000000626 | -0.000000443 | -0.000000619 |
| 7  | -0.000000711 | -0.000000567 | -0.000000273 |
| 1  | -0.000000365 | -0.000000493 | -0.000000777 |
| 6  | -0.000000834 | -0.000001536 | -0.000000032 |
| 6  | -0.000001233 | -0.000001937 | -0.000000063 |
| 6  | -0.000000843 | -0.000002762 | -0.00000007  |
| 6  | -0.000001043 | -0.000002296 | 0.000000108  |
| 6  | -0.000001149 | -0.000002187 | -0.000000561 |
| 1  | -0.000000869 | -0.000002648 | -0.000000057 |
| 1  | -0.000000682 | -0.000001276 | -0.000000329 |
| 7  | -0.000000482 | -0.000001843 | -0.000000677 |
| 8  | -0.000000366 | -0.000001849 | -0.000000323 |
| 1  | -0.000000835 | -0.00000272  | 0.000000331  |
| 1  | -0.000001005 | -0.000001784 | -0.000000346 |
| 17 | -0.000000643 | -0.000002328 | 0.000000415  |

|                                              |                             |
|----------------------------------------------|-----------------------------|
| Zero-point correction=                       | 1.320299 (Hartree/Particle) |
| Thermal correction to Energy=                | 1.403820                    |
| Thermal correction to Enthalpy=              | 1.404764                    |
| Thermal correction to Gibbs Free Energy=     | 1.192533                    |
| Sum of electronic and zero-point Energies=   | -4656.664545                |
| Sum of electronic and thermal Energies=      | -4656.581024                |
| Sum of electronic and thermal Enthalpies=    | -4656.580079                |
| Sum of electronic and thermal Free Energies= | -4656.792311                |

#### A-4a

|    |              |              |              |
|----|--------------|--------------|--------------|
| 6  | -0.000000376 | -0.000000073 | -0.000001501 |
| 6  | 0.000005057  | -0.000008348 | 0.000010424  |
| 7  | 0.000002176  | -0.000004026 | 0.000002445  |
| 7  | -0.000005025 | 0.000000585  | -0.000001347 |
| 16 | -0.00000291  | 0.000001904  | 0.000000716  |
| 8  | 0.000000687  | -0.000001216 | -0.000001199 |
| 8  | 0.000000953  | -0.000002052 | 0.000004251  |
| 6  | 0.000002978  | 0.000000692  | 0.000003136  |
| 6  | 0.000001388  | -0.00000182  | 0.000000892  |
| 6  | 0.000002547  | -0.00000041  | 0.000002167  |
| 6  | 0.000000738  | -0.000001272 | 0.000001198  |
| 6  | 0.000000566  | -0.00000174  | 0.000002283  |
| 6  | 0.000000038  | -0.000001105 | 0.00000171   |
| 1  | 0.000001353  | -0.000001357 | 0.000001845  |
| 1  | 0.000001675  | -0.000001467 | 0.000001687  |
| 1  | 0.000000094  | -0.000000578 | 0.000002007  |
| 1  | 0.000000279  | -0.000000486 | 0.000002161  |
| 6  | 0.000000857  | -0.000000949 | 0.000002296  |

|    |              |              |              |
|----|--------------|--------------|--------------|
| 1  | 0.000002219  | -0.000001409 | 0.000001509  |
| 1  | 0.000001246  | -0.000001529 | 0.000001757  |
| 1  | 0.000001817  | -0.000001752 | 0.000002036  |
| 6  | -0.000000689 | 0.000001344  | -0.000004784 |
| 6  | 0.000001922  | -0.000002646 | 0.000001903  |
| 1  | 0.000001653  | -0.000000781 | 0.000001023  |
| 1  | 0.000001537  | -0.000000826 | 0.000001315  |
| 6  | 0.000001815  | -0.000000178 | -0.000001937 |
| 1  | 0.000001336  | -0.000000263 | -0.000000151 |
| 1  | 0.000001417  | -0.000000525 | -0.000000272 |
| 6  | 0.000002011  | -0.000000832 | -0.000000348 |
| 1  | 0.000002198  | -0.000001099 | 0.000000647  |
| 1  | 0.000002131  | -0.000000543 | -0.000000266 |
| 1  | 0.000003007  | -0.000000537 | -0.000000594 |
| 1  | 0.000002142  | -0.000000859 | -0.000000913 |
| 1  | 0.000002473  | -0.000000682 | -0.000000215 |
| 6  | 0.000001868  | -0.000001221 | 0.000000613  |
| 6  | 0.000001201  | -0.000001012 | 0.000000953  |
| 1  | -0.000001289 | 0.000000769  | -0.000000008 |
| 1  | -0.00000003  | 0.000000595  | 0.000000651  |
| 6  | 0.000000402  | 0.000000541  | -0.000000154 |
| 1  | -0.000000112 | -0.000000669 | 0.000000291  |
| 1  | 0.000001166  | 0.000000031  | 0.000000322  |
| 6  | 0.000001312  | -0.000000684 | 0.000000096  |
| 1  | 0.000000908  | -0.000000347 | -0.000000397 |
| 1  | 0.000000476  | -0.000000011 | -0.000000536 |
| 1  | 0.000001527  | -0.000000288 | -0.000000345 |
| 1  | 0.000000905  | -0.000000592 | 0.000000035  |
| 1  | 0.000001463  | -0.000000062 | 0.000000229  |
| 16 | 0.000000142  | -0.000001774 | 0.000000217  |
| 8  | 0.000000492  | 0.000002139  | 0.000000212  |
| 8  | 0.000001211  | -0.00000005  | 0.000001627  |
| 6  | -0.000003842 | 0.000000414  | 0.000000617  |
| 6  | -0.000002176 | 0.000001704  | -0.000000373 |
| 6  | -0.00000108  | -0.000000219 | -0.000000082 |
| 6  | -0.000002535 | 0.000000262  | -0.000000233 |
| 1  | -0.000000716 | 0.000000368  | -0.000000067 |
| 6  | -0.000003015 | 0.000000037  | 0.000001944  |
| 1  | -0.000001528 | 0.000000806  | 0.000000941  |
| 6  | -0.000001798 | 0.00000114   | -0.000001017 |
| 1  | -0.000002452 | 0.000000682  | -0.000000268 |
| 1  | -0.000002916 | 0.000000755  | 0.000000988  |
| 6  | -0.00000403  | 0.000001097  | 0.000000175  |
| 1  | -0.000003152 | 0.000000966  | 0.000000212  |

|    |              |              |              |
|----|--------------|--------------|--------------|
| 1  | -0.000002849 | 0.000001528  | -0.000000232 |
| 1  | -0.000003466 | 0.000001196  | 0.000000179  |
| 79 | -0.000001699 | -0.000001267 | -0.000001631 |
| 6  | 0.000002863  | 0.000003378  | -0.000002265 |
| 6  | 0.000001073  | -0.000000663 | -0.000000179 |
| 6  | 0.000001269  | 0.000001617  | -0.000003532 |
| 1  | -0.000000068 | 0.000000948  | -0.00000281  |
| 1  | -0.000000717 | 0.000001301  | -0.000002291 |
| 7  | 0.000000108  | -0.000000064 | -0.000000528 |
| 7  | -0.000004323 | 0.000000516  | -0.000000554 |
| 6  | -0.000001712 | 0.000000186  | -0.000000149 |
| 6  | -0.000000272 | -0.000001359 | -0.000001238 |
| 6  | -0.000001334 | 0.000001816  | -0.000001841 |
| 6  | -0.000000882 | 0.000000192  | -0.000001405 |
| 6  | -0.000002056 | 0.000000114  | -0.000000532 |
| 6  | -0.000001207 | 0.000000616  | 0.000000377  |
| 1  | -0.000000013 | 0.000000232  | -0.000000145 |
| 1  | -0.000002151 | 0.000000685  | -0.000000245 |
| 1  | -0.000001649 | 0.000000609  | -0.000000195 |
| 6  | 0.000001511  | 0.000000791  | -0.000000881 |
| 6  | 0.000000872  | 0.000000583  | -0.000000141 |
| 6  | 0.000000499  | 0.000000031  | -0.000001547 |
| 6  | 0.000000112  | -0.000000246 | -0.000001287 |
| 6  | 0.000001619  | 0.000000278  | -0.000002003 |
| 6  | 0.000001102  | 0.000000404  | -0.000001953 |
| 1  | 0.000000157  | 0.000000691  | -0.000002167 |
| 1  | 0.000002026  | 0.000000306  | -0.000001927 |
| 1  | 0.000001582  | 0.000000188  | -0.000001922 |
| 6  | -0.000001107 | 0.000000715  | -0.000002641 |
| 6  | -0.000000632 | 0.000000965  | -0.000002033 |
| 6  | -0.000000346 | 0.000001135  | -0.000000817 |
| 1  | -0.000000547 | 0.000000906  | -0.000001752 |
| 1  | -0.000000334 | 0.000001122  | -0.000000219 |
| 1  | -0.000000091 | 0.000001214  | -0.000002234 |
| 1  | -0.000000241 | 0.000001156  | -0.000000237 |
| 1  | -0.000000194 | 0.000000602  | -0.000000913 |
| 1  | -0.000000435 | 0.000000686  | -0.000001608 |
| 1  | -0.000001033 | 0.000000692  | -0.000001407 |
| 6  | 0.000000335  | -0.000000327 | -0.000002704 |
| 6  | 0.000000564  | 0.000000287  | -0.000000078 |
| 6  | 0.000000393  | 0.000000922  | -0.000002658 |
| 1  | 0.000001047  | 0.000000072  | -0.000002015 |
| 1  | 0.000001655  | -0.000000091 | -0.000000603 |
| 1  | 0.000001953  | -0.000000022 | -0.000001595 |

|   |              |              |              |
|---|--------------|--------------|--------------|
| 1 | 0.000002698  | -0.000000359 | -0.000001695 |
| 1 | 0.000001556  | 0.000000541  | -0.000002621 |
| 1 | 0.000002359  | 0.000000295  | -0.000002363 |
| 1 | 0.000001791  | 0.00000003   | -0.00000246  |
| 6 | -0.000003389 | 0.000000325  | -0.000000647 |
| 6 | -0.00000094  | 0.000000466  | -0.000000339 |
| 6 | -0.000001381 | 0.000001534  | -0.000001432 |
| 1 | -0.000001417 | 0.000000973  | -0.000001108 |
| 1 | -0.000001663 | 0.000000738  | -0.000000292 |
| 1 | -0.000002035 | 0.000001297  | -0.000000567 |
| 1 | -0.000002267 | 0.000000719  | -0.000000403 |
| 1 | -0.000001794 | 0.00000139   | -0.000001672 |
| 1 | -0.000002426 | 0.000001512  | -0.000001021 |
| 1 | -0.000002233 | 0.000001371  | -0.000001429 |
| 6 | 0.000002447  | 0.000000984  | -0.000003125 |
| 6 | -0.000000842 | -0.000000213 | -0.000001336 |
| 6 | -0.000000673 | 0.000000453  | 0.000001089  |
| 1 | 0.000001542  | 0.000000537  | -0.000001907 |
| 1 | 0.000000097  | 0.000001122  | -0.000001583 |
| 1 | 0.000000285  | 0.00000048   | -0.000001597 |
| 1 | 0.00000069   | 0.000000398  | -0.000000477 |
| 1 | 0.000000545  | 0.000000154  | 0.000000189  |
| 1 | 0.000000773  | 0.00000016   | -0.000001646 |
| 1 | 0.0000009    | -0.000000503 | -0.000000894 |
| 8 | -0.000005839 | 0.000011461  | -0.000000896 |
| 6 | 0.000001406  | -0.000002135 | 0.000001953  |
| 6 | 0.00000149   | -0.000002575 | 0.00000385   |
| 6 | -0.00000141  | 0.000000664  | 0.000000459  |
| 6 | 0.000001041  | -0.000000537 | 0.000001717  |
| 6 | 0.000000878  | -0.000000502 | 0.00000138   |
| 6 | -0.00000052  | -0.000000188 | -0.000001754 |
| 6 | 0.000000685  | 0.000001734  | -0.000001908 |
| 6 | -0.000002923 | -0.000001527 | 0.000000984  |
| 1 | 0.000000343  | -0.000000629 | 0.000000615  |
| 1 | 0.000000365  | -0.000000764 | 0.000001265  |
| 1 | 0.0000012    | -0.000001242 | 0.000001064  |
| 1 | 0.000001952  | -0.000000391 | 0.000002226  |
| 1 | 0.000007316  | -0.000010073 | 0.000000794  |
| 1 | -0.000000935 | 0.000000172  | 0.000000621  |
| 7 | -0.000003242 | 0.000003094  | -0.000000352 |
| 1 | 0.000000703  | -0.000000778 | 0.000000746  |
| 6 | -0.000001139 | 0.000000735  | 0.000002069  |
| 6 | 0.000000039  | -0.000001251 | 0.000002408  |
| 6 | -0.000000547 | 0.00000018   | 0.000004119  |

|    |              |              |              |
|----|--------------|--------------|--------------|
| 6  | -0.000002604 | -0.000002271 | 0.000003207  |
| 6  | 0.000002449  | 0.00000009   | 0.00000284   |
| 1  | -0.000000372 | -0.000001314 | 0.000003689  |
| 1  | -0.000000997 | -0.000001066 | 0.000002503  |
| 7  | -0.000001771 | -0.000001025 | 0.000003145  |
| 8  | -0.000007242 | 0.000004827  | -0.000000861 |
| 1  | -0.000000236 | -0.000001099 | 0.000003405  |
| 1  | -0.000000882 | -0.000000882 | 0.000003026  |
| 17 | -0.000001737 | -0.000001564 | 0.000002297  |

|                                              |                             |
|----------------------------------------------|-----------------------------|
| Zero-point correction=                       | 1.324665 (Hartree/Particle) |
| Thermal correction to Energy=                | 1.408689                    |
| Thermal correction to Enthalpy=              | 1.409633                    |
| Thermal correction to Gibbs Free Energy=     | 1.195511                    |
| Sum of electronic and zero-point Energies=   | -4656.688223                |
| Sum of electronic and thermal Energies=      | -4656.604199                |
| Sum of electronic and thermal Enthalpies=    | -4656.603255                |
| Sum of electronic and thermal Free Energies= | -4656.817377                |

A-TSa5

|    |              |              |              |
|----|--------------|--------------|--------------|
| 6  | -0.00000074  | -0.000000815 | 0.000001008  |
| 6  | 0.000001163  | 0.000000697  | -0.000001203 |
| 7  | 0.000000258  | 0.000000016  | 0.000000441  |
| 7  | -0.000000168 | 0.000000015  | -0.000000397 |
| 16 | -0.000000047 | -0.000000087 | -0.000000648 |
| 8  | 0.00000014   | -0.000001066 | -0.000000113 |
| 8  | 0.000000363  | -0.000000853 | 0.000000513  |
| 6  | -0.000000033 | -0.000000071 | -0.000000324 |
| 6  | -0.000000753 | -0.000000552 | -0.000001044 |
| 6  | -0.000000182 | -0.000000239 | -0.000001683 |
| 6  | -0.000000416 | 0.000000025  | -0.000001493 |
| 6  | -0.000000518 | 0.000000464  | -0.000001232 |
| 6  | -0.000000017 | 0.000000389  | -0.000000787 |
| 1  | -0.000000325 | -0.000001019 | -0.000001207 |
| 1  | -0.000000538 | -0.000000606 | -0.00000192  |
| 1  | -0.000000318 | 0.000001046  | -0.000001254 |
| 1  | 0.000000063  | 0.000000655  | -0.000000652 |
| 6  | -0.000000505 | 0.000000541  | -0.000002071 |
| 1  | -0.000000724 | 0.000000222  | -0.000002349 |
| 1  | -0.000000515 | 0.000000763  | -0.000002161 |
| 1  | -0.000000556 | 0.000000059  | -0.000002058 |
| 6  | -0.000000638 | -0.000001201 | -0.000000739 |
| 6  | -0.000000302 | -0.000000048 | -0.000001077 |
| 1  | -0.000000264 | -0.000000601 | -0.000000676 |
| 1  | 0.00000001   | -0.000001215 | -0.000000332 |

|    |              |              |              |
|----|--------------|--------------|--------------|
| 6  | -0.00000564  | -0.000001355 | -0.000001142 |
| 1  | -0.000000121 | -0.000000609 | -0.000001357 |
| 1  | -0.00000057  | -0.00000132  | -0.000001016 |
| 6  | -0.000000431 | -0.000001325 | -0.000001982 |
| 1  | -0.000000385 | -0.00000164  | -0.000001038 |
| 1  | -0.000000371 | -0.000001154 | -0.000001322 |
| 1  | -0.000000603 | -0.000001668 | -0.000002065 |
| 1  | -0.000000636 | -0.000000999 | -0.000002108 |
| 1  | -0.000000586 | -0.000001735 | -0.000001808 |
| 6  | 0.000000006  | 0.000000466  | -0.000001116 |
| 6  | -0.000000134 | 0.000000648  | -0.000001451 |
| 1  | -0.000000136 | 0.00000111   | -0.000000688 |
| 1  | -0.000000335 | 0.000000139  | -0.000000805 |
| 6  | -0.000000764 | 0.000000576  | -0.000001616 |
| 1  | -0.000000348 | 0.000000907  | -0.000001515 |
| 1  | -0.000000415 | 0.000000453  | -0.000001365 |
| 6  | -0.000000691 | 0.00000051   | -0.000002305 |
| 1  | -0.000000335 | -0.000000065 | -0.000001932 |
| 1  | -0.000000519 | 0.000000771  | -0.000002059 |
| 1  | -0.000000706 | 0.000000372  | -0.00000026  |
| 1  | -0.000000588 | 0.000000849  | -0.000002589 |
| 1  | -0.000000694 | 0.000000126  | -0.000002503 |
| 16 | -0.000000031 | 0.000002119  | -0.000000042 |
| 8  | -0.000000514 | 0.000001283  | -0.000000892 |
| 8  | 0.000000406  | 0.000000816  | 0            |
| 6  | 0.000000069  | 0.000001867  | -0.000000342 |
| 6  | -0.000000212 | 0.000002099  | -0.000000621 |
| 6  | 0.000000107  | 0.000001956  | 0.000000086  |
| 6  | -0.000000076 | 0.000002509  | -0.000000898 |
| 1  | -0.000000324 | 0.000001963  | -0.000001076 |
| 6  | 0.000000002  | 0.000002357  | 0.000000202  |
| 1  | 0.000000224  | 0.000001482  | 0.000000447  |
| 6  | 0.00000008   | 0.000003167  | -0.000000219 |
| 1  | -0.000000224 | 0.000002568  | -0.000001203 |
| 1  | 0.000000124  | 0.000002173  | 0.000000583  |
| 6  | 0.00000005   | 0.000003116  | -0.000000027 |
| 1  | 0.000000088  | 0.000003421  | -0.000000195 |
| 1  | -0.000000095 | 0.000003066  | -0.000000681 |
| 1  | 0.000000012  | 0.000002895  | -0.000000007 |
| 79 | 0.000000561  | -0.000000394 | 0.000000902  |
| 6  | 0.00000077   | 0.000000215  | -0.000000058 |
| 6  | -0.00000005  | 0.000000089  | 0.000000688  |
| 6  | 0.000000361  | -0.00000035  | 0.000000056  |
| 1  | -0.000000055 | -0.000000427 | -0.000000189 |

|   |              |              |              |
|---|--------------|--------------|--------------|
| 1 | 0.0000001    | -0.000000459 | 0.000000903  |
| 7 | -0.000000054 | -0.000000639 | 0.000001494  |
| 7 | -0.000000587 | -0.000000076 | 0.000000005  |
| 6 | 0.000000411  | -0.000000152 | 0.000001408  |
| 6 | 0.000000285  | -0.000001144 | 0.000001108  |
| 6 | 0.000000579  | -0.000000062 | 0.000002141  |
| 6 | 0.000000663  | -0.000001087 | 0.000002358  |
| 6 | 0.00000073   | -0.000000051 | 0.000002024  |
| 6 | 0.000000677  | -0.000000135 | 0.000002613  |
| 1 | 0.000000633  | -0.000001141 | 0.000002444  |
| 1 | 0.000000693  | 0.000000564  | 0.000002443  |
| 1 | 0.000000773  | -0.000000257 | 0.000002914  |
| 6 | -0.000000375 | -0.000000623 | -0.000000521 |
| 6 | 0.000000059  | 0.000000062  | -0.000000699 |
| 6 | -0.000000445 | -0.000000883 | -0.000000525 |
| 6 | -0.00000025  | 0.000000024  | -0.000001293 |
| 6 | -0.000000388 | -0.000000751 | -0.00000123  |
| 6 | -0.000000332 | -0.000000311 | -0.000001528 |
| 1 | -0.000000382 | 0.000000548  | -0.000001464 |
| 1 | -0.000000472 | -0.000001174 | -0.000001471 |
| 1 | -0.000000536 | -0.000000297 | -0.000001928 |
| 6 | -0.000000187 | 0.000000087  | -0.000000369 |
| 6 | -0.000000266 | 0.000000981  | -0.000000777 |
| 6 | -0.000000157 | 0.000001373  | -0.000000388 |
| 1 | -0.000000036 | 0.000000594  | -0.000000309 |
| 1 | -0.000000185 | 0.000000795  | -0.000000851 |
| 1 | -0.000000104 | 0.000001397  | -0.000000551 |
| 1 | -0.000000282 | 0.000001162  | -0.000001204 |
| 1 | 0.000000039  | 0.000000766  | -0.000000267 |
| 1 | -0.000000088 | 0.000001185  | -0.000000897 |
| 1 | 0            | 0.000001551  | -0.00000011  |
| 6 | -0.000000109 | -0.000001557 | -0.000000541 |
| 6 | 0.000000082  | -0.000001632 | -0.000000361 |
| 6 | -0.000000168 | -0.000001355 | -0.000000889 |
| 1 | -0.000000059 | -0.000001083 | -0.000000434 |
| 1 | 0.000000064  | -0.000001254 | -0.000000208 |
| 1 | -0.000000011 | -0.000002093 | -0.000000075 |
| 1 | -0.000000026 | -0.000001676 | -0.000000747 |
| 1 | -0.000000248 | -0.000001247 | -0.000000719 |
| 1 | -0.000000428 | -0.000002092 | -0.000001333 |
| 1 | -0.000000382 | -0.000002193 | -0.000000462 |
| 6 | 0.000000456  | 0.000000709  | 0.00000146   |
| 6 | 0.000000221  | 0.000000953  | 0.000001544  |
| 6 | 0.000000365  | 0.000000876  | 0.000001724  |

|   |             |             |             |
|---|-------------|-------------|-------------|
| 1 | 0.00000272  | 0.00000906  | 0.00000671  |
| 1 | 0.00000584  | 0.00000987  | 0.00001158  |
| 1 | 0.00000405  | 0.00001555  | 0.00001372  |
| 1 | 0.0000058   | 0.00001117  | 0.00001927  |
| 1 | 0.00000362  | 0.00000838  | 0.00001557  |
| 1 | 0.00000661  | 0.0000118   | 0.00001946  |
| 1 | 0.00000489  | 0.00001439  | 0.00001504  |
| 6 | 0.00000259  | -0.0000134  | 0.00001171  |
| 6 | 0.00000438  | -0.00001682 | 0.00001557  |
| 6 | 0.00000295  | -0.00001635 | 0.00001417  |
| 1 | 0.00000128  | -0.00001229 | 0.00001133  |
| 1 | 0.00000383  | -0.00001378 | 0.00001548  |
| 1 | 0.0000029   | -0.00002111 | 0.00001294  |
| 1 | 0.00000466  | -0.0000181  | 0.0000202   |
| 1 | 0.00000362  | -0.00001473 | 0.00001275  |
| 1 | 0.00000504  | -0.00001938 | 0.00001873  |
| 1 | 0.00000277  | -0.00002153 | 0.00001267  |
| 8 | -0.00000622 | 0.0000081   | 0.00000793  |
| 6 | 0.00000214  | -0.00000587 | 0.00000471  |
| 6 | 0.0000017   | -0.00000923 | 0.00000933  |
| 6 | 0.00000598  | -0.00001351 | 0.00001298  |
| 6 | 0.00000501  | -0.00001595 | 0.00001698  |
| 6 | 0.00000064  | -0.00001992 | 0.00001403  |
| 6 | 0.00000316  | -0.00001785 | 0.00000029  |
| 6 | 0.00000298  | -0.00000084 | 0.0000145   |
| 6 | 0.00000236  | -0.00000751 | 0.00000588  |
| 1 | 0.00000488  | -0.00001517 | 0.00002128  |
| 1 | 0.00000421  | -0.00002142 | 0.00001989  |
| 1 | 0.00000078  | -0.00002219 | 0.00001199  |
| 1 | 0.00000014  | -0.00001328 | 0.00000649  |
| 1 | 0.00001102  | 0.00002753  | -0.00000044 |
| 1 | 0.00000382  | 0.00000161  | 0.00001333  |
| 7 | 0.00000353  | -0.00000049 | 0.00001792  |
| 1 | 0.00000153  | -0.00000625 | 0.00001875  |
| 6 | 0.00000616  | 0.00000953  | 0.00000743  |
| 6 | 0.00000314  | 0.00000909  | 0.00000965  |
| 6 | 0.00000338  | 0.00000604  | 0.00001481  |
| 6 | 0.00000915  | -0.00000066 | 0.00001499  |
| 6 | 0.00000473  | 0.00000107  | 0.00001126  |
| 1 | 0.00000334  | 0.00000567  | 0.00001345  |
| 1 | 0.00000072  | 0.00001103  | 0.00000523  |
| 7 | -0.00001503 | 0.00002574  | 0.00000969  |
| 8 | 0.00000133  | -0.0000289  | 0.00002363  |
| 1 | 0.00000453  | -0.00000299 | 0.00001706  |



|                                              |             |              |                             |
|----------------------------------------------|-------------|--------------|-----------------------------|
| 1                                            | 0.00000205  | 0.000001185  | 0.000000741                 |
| 17                                           | 0.000000316 | -0.000000581 | 0.000001759                 |
| Zero-point correction=                       |             |              | 1.319942 (Hartree/Particle) |
| Thermal correction to Energy=                |             |              | 1.404044                    |
| Thermal correction to Enthalpy=              |             |              | 1.404988                    |
| Thermal correction to Gibbs Free Energy=     |             |              | 1.188456                    |
| Sum of electronic and zero-point Energies=   |             |              | -4656.677412                |
| Sum of electronic and thermal Energies=      |             |              | -4656.593310                |
| Sum of electronic and thermal Enthalpies=    |             |              | -4656.592366                |
| Sum of electronic and thermal Free Energies= |             |              | -4656.808898                |

A-5a

|    |              |              |              |
|----|--------------|--------------|--------------|
| 6  | -0.000001709 | 0.000003756  | -0.000000015 |
| 6  | 0.000004166  | 0.000002026  | 0.000001632  |
| 7  | 0.00000115   | -0.000002406 | -0.000001643 |
| 7  | -0.000002033 | -0.000001988 | -0.000003907 |
| 16 | 0.000001116  | 0.000000681  | 0.000001506  |
| 8  | 0.000000137  | 0.000001396  | 0.000000377  |
| 8  | -0.000001388 | -0.000002231 | 0.000001426  |
| 6  | -0.000000368 | 0.000000054  | -0.000000152 |
| 6  | -0.000000336 | -0.0000007   | 0.000000612  |
| 6  | 0.000000452  | -0.000000491 | 0.000000128  |
| 6  | -0.000000264 | 0.000000671  | 0.000000591  |
| 6  | -0.000000812 | -0.000001021 | 0.000001775  |
| 6  | -0.000000478 | 0.000000053  | -0.000000029 |
| 1  | 0.000000138  | 0.000000221  | 0.000000286  |
| 1  | -0.000000298 | -0.000000331 | 0.000000471  |
| 1  | -0.000000569 | -0.000000411 | 0.000001036  |
| 1  | -0.000000521 | -0.000000178 | 0.000001246  |
| 6  | -0.000000711 | -0.000000275 | 0.000000663  |
| 1  | -0.000000512 | -0.000001162 | 0.000000387  |
| 1  | -0.000000741 | -0.000000449 | 0.000000626  |
| 1  | -0.00000008  | -0.000000546 | 0.000000423  |
| 6  | -0.000000327 | 0.000001826  | -0.000002426 |
| 6  | -0.000000898 | -0.000000244 | 0.000001456  |
| 1  | -0.0000007   | -0.000000887 | 0.000001275  |
| 1  | -0.000000766 | -0.000000065 | 0.000000069  |
| 6  | -0.000000808 | 0.000000064  | 0.000000085  |
| 1  | -0.000000804 | -0.000000276 | 0.000000433  |
| 1  | -0.000000302 | 0.000000327  | 0.000001856  |
| 6  | -0.000000292 | -0.000000185 | 0.000001223  |
| 1  | -0.000000293 | 0.000000111  | 0.000001391  |
| 1  | -0.000000481 | -0.000000392 | 0.000000097  |
| 1  | -0.000000573 | -0.000000029 | 0.000001353  |

|    |              |              |              |
|----|--------------|--------------|--------------|
| 1  | -0.000000565 | -0.000000095 | 0.000000962  |
| 1  | -0.000000401 | 0.000000067  | 0.000001293  |
| 6  | -0.000000454 | 0.00000141   | 0.000001352  |
| 6  | 0.000000289  | 0.000000583  | 0.000001861  |
| 1  | 0.000000286  | 0.000000239  | 0.000000656  |
| 1  | 0.000000309  | 0.000000382  | 0.0000015    |
| 6  | 0.000000339  | 0.000000709  | 0.000001396  |
| 1  | -0.000000539 | 0.000000956  | -0.000000049 |
| 1  | -0.000000278 | 0.000000939  | 0.000001014  |
| 6  | 0.000000343  | 0.000000391  | 0.000000834  |
| 1  | 0.000000054  | 0.000000454  | 0.000000321  |
| 1  | -0.000000261 | 0.000000703  | 0.000000532  |
| 1  | -0.000000056 | 0.000000912  | 0.000001221  |
| 1  | 0.000000006  | 0.000000997  | 0.000000927  |
| 1  | -0.000000202 | 0.000000764  | 0.00000124   |
| 16 | 0.000000684  | 0.000003788  | 0.000004275  |
| 8  | -0.000000088 | -0.000001244 | -0.000001012 |
| 8  | 0.000000166  | -0.000000504 | -0.000001907 |
| 6  | 0.000002435  | 0.00000235   | -0.000002137 |
| 6  | 0.000002044  | -0.000001634 | 0.000002032  |
| 6  | -0.000004226 | 0.000001807  | 0.000003177  |
| 6  | -0.000003387 | 0.00000043   | 0.000000974  |
| 1  | -0.000001065 | 0.000000704  | -0.000000813 |
| 6  | 0.000002945  | -0.000003628 | 0.000002255  |
| 1  | 0.000001412  | 0.000000739  | -0.000000267 |
| 6  | 0.000000868  | 0.000003317  | -0.000003611 |
| 1  | 0.000000764  | 0.000000773  | -0.000000748 |
| 1  | 0.000000266  | 0.000002042  | -0.0000006   |
| 6  | 0.000000428  | -0.00000014  | 0.000001292  |
| 1  | 0.0000013    | 0.000000501  | -0.00000058  |
| 1  | 0.000000954  | 0.000001583  | 0.00000042   |
| 1  | -0.000000312 | 0.000001919  | -0.000000116 |
| 79 | 0.00000271   | -0.0000012   | -0.000005271 |
| 6  | -0.000000513 | 0.000001641  | 0.000000703  |
| 6  | -0.000000189 | -0.000000106 | -0.000001176 |
| 6  | 0.000000458  | -0.000000068 | -0.000001802 |
| 1  | 0.000000376  | -0.000000358 | -0.000001251 |
| 1  | 0.000000256  | -0.0000006   | -0.000000627 |
| 7  | -0.000000787 | 0.000000229  | -0.000000983 |
| 7  | -0.000000613 | -0.000000913 | 0.000000402  |
| 6  | 0.000000156  | 0.000000291  | -0.000002005 |
| 6  | 0.000000852  | -0.000000328 | -0.000000399 |
| 6  | -0.000000215 | -0.000000586 | 0.000000197  |
| 6  | 0.00000007   | -0.00000111  | -0.000000022 |

|   |              |              |              |
|---|--------------|--------------|--------------|
| 6 | -0.000001008 | -0.000000646 | 0.000000064  |
| 6 | -0.000000037 | -0.000000296 | -0.000000589 |
| 1 | -0.000000016 | -0.000000338 | -0.000000122 |
| 1 | -0.000000243 | -0.000000799 | -0.000000382 |
| 1 | -0.000000164 | -0.000000667 | -0.000000321 |
| 6 | 0.000000782  | -0.000000212 | -0.000000399 |
| 6 | -0.000000375 | 0.000000153  | -0.000000834 |
| 6 | 0.000000031  | 0.000000534  | -0.000000726 |
| 6 | 0.000000694  | -0.000000472 | -0.000000864 |
| 6 | 0.000000541  | 0.000000031  | -0.000000617 |
| 6 | 0.000000417  | 0.000000686  | 0.000000101  |
| 1 | 0.000000017  | 0.000000178  | -0.000000833 |
| 1 | 0.000000615  | 0.000000719  | -0.000001121 |
| 1 | 0.000000565  | 0.000000328  | -0.000000917 |
| 6 | 0.000000696  | 0.000000435  | -0.000001291 |
| 6 | 0.000000374  | -0.000000719 | -0.000000776 |
| 6 | -0.000000011 | -0.000000405 | -0.000000629 |
| 1 | -0.000000118 | -0.000000596 | -0.000000201 |
| 1 | 0.000000153  | -0.000000503 | -0.000000949 |
| 1 | 0.000000005  | -0.000000704 | -0.000000833 |
| 1 | -0.000000107 | -0.000000208 | -0.000000842 |
| 1 | -0.000000166 | -0.000000021 | -0.000000472 |
| 1 | 0.000000003  | -0.000000018 | -0.000000232 |
| 1 | -0.000000049 | -0.000000202 | -0.000000341 |
| 6 | 0.000000404  | 0.000000893  | -0.000000673 |
| 6 | 0.000000727  | 0.000000746  | -0.000000878 |
| 6 | 0.000000646  | -0.000000289 | -0.000001074 |
| 1 | 0.000000412  | 0.000000063  | -0.000000525 |
| 1 | 0.000000649  | 0.000000783  | -0.000000083 |
| 1 | 0.000000434  | 0.000000578  | -0.000000094 |
| 1 | 0.000000479  | 0.000000914  | -0.000000367 |
| 1 | 0.000000522  | 0.000000252  | -0.000000984 |
| 1 | 0.000000068  | 0.000000702  | -0.000001055 |
| 1 | 0.000000701  | 0.000000528  | -0.000000093 |
| 6 | 0.000000543  | -0.000001137 | -0.000000476 |
| 6 | -0.000000078 | -0.000001006 | 0.000000104  |
| 6 | 0.000000052  | -0.000000856 | -0.000000558 |
| 1 | -0.000000344 | 0.000000026  | -0.000000085 |
| 1 | -0.000000105 | -0.000000482 | -0.000000259 |
| 1 | -0.000000152 | -0.000000845 | -0.000000357 |
| 1 | -0.000000297 | -0.000000598 | -0.000000261 |
| 1 | -0.000000231 | -0.000000853 | -0.000000732 |
| 1 | -0.000000315 | -0.000001013 | -0.000000542 |
| 1 | -0.000000282 | -0.000000992 | -0.000000621 |

|   |              |              |              |
|---|--------------|--------------|--------------|
| 6 | 0.000000028  | 0.000000712  | 0.000000037  |
| 6 | 0.000000363  | 0.000000066  | -0.000000652 |
| 6 | 0.000001186  | -0.000000146 | -0.000000461 |
| 1 | 0.000000347  | -0.000000485 | -0.000000335 |
| 1 | 0.000000373  | -0.000000306 | -0.000000764 |
| 1 | 0.000000354  | 0.000000172  | -0.000000918 |
| 1 | 0.000000226  | -0.000000176 | -0.000000767 |
| 1 | -0.000000229 | -0.000000038 | -0.000000262 |
| 1 | -0.000000063 | 0.000000112  | -0.000000255 |
| 1 | 0.000000438  | 0.000000047  | -0.000000273 |
| 8 | -0.000000003 | -0.000001896 | 0.000001739  |
| 6 | 0.000000504  | 0.000000667  | 0.000000163  |
| 6 | -0.000000064 | -0.000002698 | 0.000000623  |
| 6 | 0.000000203  | -0.000000115 | 0.000000072  |
| 6 | -0.000000073 | -0.000000791 | 0.000000572  |
| 6 | -0.00000002  | -0.000000838 | -0.000000375 |
| 6 | -0.000000795 | 0.000000327  | 0.000001083  |
| 6 | -0.000002297 | -0.000003934 | 0.000002319  |
| 6 | 0.000000308  | 0.000001012  | -0.000000131 |
| 1 | -0.000000574 | -0.000000601 | 0.000000154  |
| 1 | -0.000000555 | -0.000000956 | 0.000000269  |
| 1 | -0.000000575 | -0.000000909 | 0.000000399  |
| 1 | -0.000000843 | -0.000000721 | 0.000000664  |
| 1 | -0.000000887 | -0.000000332 | 0.000000418  |
| 1 | 0.000000075  | 0.000000045  | 0.000000638  |
| 7 | 0.000000057  | 0.000003994  | -0.000000085 |
| 1 | -0.000000442 | -0.000002594 | 0.000000333  |

|                                              |                             |
|----------------------------------------------|-----------------------------|
| Zero-point correction=                       | 1.241175 (Hartree/Particle) |
| Thermal correction to Energy=                | 1.318139                    |
| Thermal correction to Enthalpy=              | 1.319083                    |
| Thermal correction to Gibbs Free Energy=     | 1.114818                    |
| Sum of electronic and zero-point Energies=   | -3873.757320                |
| Sum of electronic and thermal Energies=      | -3873.680356                |
| Sum of electronic and thermal Enthalpies=    | -3873.679412                |
| Sum of electronic and thermal Free Energies= | -3873.883677                |

#### A-TSa44

|    |              |              |              |
|----|--------------|--------------|--------------|
| 6  | 0.000000114  | 0.000000164  | 0.000002543  |
| 6  | -0.000000287 | -0.000000637 | -0.000000815 |
| 7  | -0.000001088 | 0.00000209   | 0.000001215  |
| 7  | 0.000001347  | 0.000000391  | -0.000000791 |
| 16 | -0.000000112 | -0.000000047 | -0.000000362 |
| 8  | -0.000000467 | 0.000000672  | 0.00000009   |
| 8  | -0.000000059 | 0.000000115  | 0.000000917  |

|    |              |              |              |
|----|--------------|--------------|--------------|
| 6  | 0.000000666  | 0.000000053  | -0.000000354 |
| 6  | 0.000000595  | -0.000000617 | -0.000000674 |
| 6  | 0.000001927  | -0.000000283 | -0.000000835 |
| 6  | 0.000000809  | -0.000001411 | -0.000000813 |
| 6  | 0.000000023  | -0.000002363 | -0.000000016 |
| 6  | 0.000000256  | -0.000001333 | -0.000000108 |
| 1  | 0.000001017  | 0.000000185  | -0.000000804 |
| 1  | 0.000001095  | -0.000000708 | -0.000001715 |
| 1  | 0.000000834  | -0.000002106 | 0.000000017  |
| 1  | 0.000000131  | -0.000000982 | 0.000001057  |
| 6  | 0.000001272  | -0.000001953 | -0.000000121 |
| 1  | 0.000002022  | -0.000002672 | -0.000001687 |
| 1  | 0.000001138  | -0.000001856 | -0.000001426 |
| 1  | 0.000002242  | -0.000001927 | -0.000000677 |
| 6  | -0.000000012 | 0.000000043  | 0.000000546  |
| 6  | -0.000001035 | 0.000001586  | 0.000000674  |
| 1  | -0.000000859 | 0.000000615  | 0.000000411  |
| 1  | -0.000001028 | 0.000000212  | 0.000001565  |
| 6  | -0.000001258 | 0.00000146   | 0.000001442  |
| 1  | -0.000001032 | 0.000001126  | 0.000000609  |
| 1  | -0.00000086  | 0.000000739  | 0.000000965  |
| 6  | -0.000001789 | 0.000002379  | 0.000001659  |
| 1  | -0.000001912 | 0.000000868  | 0.000001649  |
| 1  | -0.000001163 | 0.000001435  | 0.000000822  |
| 1  | -0.000002085 | 0.000002366  | 0.000001837  |
| 1  | -0.000001684 | 0.000002406  | 0.000000895  |
| 1  | -0.000001712 | 0.000001765  | 0.000001609  |
| 6  | -0.000000044 | 0.000000866  | -0.000001035 |
| 6  | -0.000000196 | 0.000001421  | -0.000000944 |
| 1  | -0.000000404 | 0.000001912  | -0.000001677 |
| 1  | -0.00000013  | 0.000001359  | -0.000000015 |
| 6  | -0.000000407 | 0.000001917  | -0.000000639 |
| 1  | 0.000000086  | 0.000002007  | -0.000000746 |
| 1  | -0.000000578 | 0.000001879  | -0.000001108 |
| 6  | -0.000000769 | 0.000002733  | -0.000000702 |
| 1  | -0.000000836 | 0.000002378  | -0.000000229 |
| 1  | -0.000000596 | 0.000002552  | -0.000001036 |
| 1  | -0.000001025 | 0.000003202  | -0.000000621 |
| 1  | -0.000000557 | 0.000002973  | -0.00000101  |
| 1  | -0.000000925 | 0.00000269   | -0.000000434 |
| 16 | 0.000000655  | 0.000000923  | -0.000001073 |
| 8  | 0.000000802  | 0.000001728  | -0.000002396 |
| 8  | 0.000000746  | 0.000000162  | -0.000002297 |
| 6  | 0.000001407  | -0.000000342 | -0.000002325 |

|    |              |              |              |
|----|--------------|--------------|--------------|
| 6  | 0.000001107  | 0.000001063  | -0.00000211  |
| 6  | 0.000001448  | 0.000000342  | -0.000002547 |
| 6  | 0.000001602  | 0.000000325  | -0.000002731 |
| 1  | 0.000000969  | 0.000001247  | -0.000002531 |
| 6  | 0.000001688  | 0.000000001  | -0.000002419 |
| 1  | 0.000001471  | -0.000000663 | -0.000002295 |
| 6  | 0.000001586  | 0.000000096  | -0.000003    |
| 1  | 0.000001316  | 0.000000909  | -0.000002923 |
| 1  | 0.000001979  | -0.000000924 | -0.000002693 |
| 6  | 0.000001899  | -0.000000252 | -0.000003247 |
| 1  | 0.000002292  | -0.000000884 | -0.000002832 |
| 1  | 0.000002349  | -0.000000276 | -0.000003919 |
| 1  | 0.000001737  | 0.000000208  | -0.000003174 |
| 79 | -0.000000694 | 0.000000941  | 0.00000032   |
| 6  | -0.000000121 | -0.000001095 | 0.00000033   |
| 6  | -0.000000222 | -0.000000242 | 0.000000553  |
| 6  | -0.000000541 | 0.000000735  | 0.000000858  |
| 1  | -0.000000731 | 0.000000516  | 0.000000868  |
| 1  | -0.000000194 | -0.000000679 | 0.000000672  |
| 7  | -0.000000099 | -0.000000273 | 0.000000382  |
| 7  | -0.000000194 | -0.000000247 | 0.000000681  |
| 6  | 0.000000038  | -0.000000881 | 0.000000727  |
| 6  | -0.000000025 | -0.000001587 | 0.000001191  |
| 6  | 0.000000811  | -0.000001602 | -0.000000255 |
| 6  | 0.000000105  | -0.000002376 | 0.000001395  |
| 6  | 0.000001237  | -0.000002043 | -0.000000128 |
| 6  | 0.000000481  | -0.000002629 | 0.000000393  |
| 1  | 0.000000502  | -0.000002663 | 0.000001362  |
| 1  | 0.000001035  | -0.000002201 | -0.000000456 |
| 1  | 0.000001022  | -0.00000309  | 0.000000426  |
| 6  | -0.000001003 | 0.000001474  | -0.000000505 |
| 6  | -0.000000012 | 0.000000858  | 0.000000379  |
| 6  | -0.000001795 | 0.000000927  | 0.000001455  |
| 6  | -0.000000894 | 0.000002414  | -0.000000423 |
| 6  | -0.000001206 | 0.000002265  | 0.000000508  |
| 6  | -0.000001199 | 0.000002232  | 0.00000064   |
| 1  | -0.000000828 | 0.000002529  | -0.000000419 |
| 1  | -0.000001772 | 0.000002111  | 0.000001722  |
| 1  | -0.000001424 | 0.000002819  | 0.000000449  |
| 6  | -0.000000368 | 0.000001559  | -0.000001024 |
| 6  | -0.000000261 | 0.000001697  | -0.000000794 |
| 6  | -0.000000218 | 0.00000154   | -0.000001055 |
| 1  | -0.000000091 | 0.000001028  | -0.000000251 |
| 1  | -0.000000412 | 0.000001787  | -0.000000422 |

|   |              |              |              |
|---|--------------|--------------|--------------|
| 1 | -0.00000018  | 0.000001683  | -0.000001196 |
| 1 | -0.000000508 | 0.000002346  | -0.000000908 |
| 1 | -0.000000204 | 0.000001334  | -0.000000599 |
| 1 | 0.000000231  | 0.000002066  | -0.000001111 |
| 1 | 0.000000409  | 0.000001335  | -0.000001689 |
| 6 | -0.000001774 | 0.000000395  | 0.000001467  |
| 6 | -0.00000132  | 0.000001025  | 0.000001739  |
| 6 | -0.000001775 | 0.000000886  | 0.000002292  |
| 1 | -0.000000906 | 0.000000313  | 0.000001307  |
| 1 | -0.000001588 | 0.000000503  | 0.000001895  |
| 1 | -0.000001552 | 0.000000328  | 0.000002407  |
| 1 | -0.00000161  | 0.000000831  | 0.000001966  |
| 1 | -0.000001392 | 0.000001176  | 0.00000173   |
| 1 | -0.000001789 | 0.00000173   | 0.000002274  |
| 1 | -0.000001839 | 0.000000508  | 0.000002496  |
| 6 | 0.00000063   | -0.00000074  | -0.00000057  |
| 6 | 0.000001093  | -0.000000919 | -0.000000967 |
| 6 | 0.000001024  | -0.000001404 | -0.000000947 |
| 1 | 0.000000689  | -0.000000715 | -0.000000922 |
| 1 | 0.000001527  | -0.000001316 | -0.000001536 |
| 1 | 0.000001305  | -0.000000795 | -0.000001541 |
| 1 | 0.000001376  | -0.000001604 | -0.000001233 |
| 1 | 0.000000785  | -0.000001137 | -0.000000513 |
| 1 | 0.000001466  | -0.000001497 | -0.000000955 |
| 1 | 0.000001091  | -0.000000821 | -0.000001409 |
| 6 | -0.000000398 | -0.000001289 | 0.000001512  |
| 6 | -0.000000488 | -0.000001706 | 0.000002092  |
| 6 | -0.000000608 | -0.000001428 | 0.000002231  |
| 1 | -0.000000335 | -0.000000881 | 0.000001976  |
| 1 | -0.000000477 | -0.000001668 | 0.000001867  |
| 1 | -0.000000844 | -0.000001658 | 0.000002404  |
| 1 | -0.00000019  | -0.000002292 | 0.000002163  |
| 1 | -0.000000236 | -0.00000124  | 0.00000157   |
| 1 | -0.000000268 | -0.000002404 | 0.000002053  |
| 1 | -0.000000944 | -0.000001454 | 0.000002509  |
| 8 | 0.000001489  | 0.000000069  | -0.000001389 |
| 6 | -0.000000459 | -0.000001235 | 0.000000815  |
| 6 | -0.000000231 | -0.000001864 | 0.000000725  |
| 6 | 0.000000116  | -0.000002157 | 0.000001441  |
| 6 | -0.000000044 | -0.000002578 | 0.000001863  |
| 6 | -0.000000553 | -0.000001558 | 0.000002337  |
| 6 | -0.000000095 | -0.000000523 | 0.000001563  |
| 6 | -0.000000192 | -0.000001721 | -0.000000607 |
| 6 | 0.000000726  | -0.000001549 | 0.000000081  |

|   |             |             |             |
|---|-------------|-------------|-------------|
| 1 | 0.00000387  | -0.00002953 | 0.00001449  |
| 1 | -0.00000259 | -0.00002693 | 0.0000233   |
| 1 | -0.00000744 | -0.00001545 | 0.00002338  |
| 1 | -0.00000288 | -0.00001387 | 0.00001214  |
| 1 | 0.00001003  | -0.00001008 | -0.00001671 |
| 1 | 0.00000703  | -0.00001444 | -0.00000325 |
| 7 | 0.00000848  | -0.00002089 | 0.00000617  |
| 1 | 0.0000091   | -0.0000024  | 0.00000403  |

|                                              |                             |
|----------------------------------------------|-----------------------------|
| Zero-point correction=                       | 1.235264 (Hartree/Particle) |
| Thermal correction to Energy=                | 1.311920                    |
| Thermal correction to Enthalpy=              | 1.312864                    |
| Thermal correction to Gibbs Free Energy=     | 1.115818                    |
| Sum of electronic and zero-point Energies=   | -3873.630827                |
| Sum of electronic and thermal Energies=      | -3873.554171                |
| Sum of electronic and thermal Enthalpies=    | -3873.553227                |
| Sum of electronic and thermal Free Energies= | -3873.750273                |

A-5a

|    |             |             |             |
|----|-------------|-------------|-------------|
| 6  | -0.00001709 | 0.00003756  | -0.00000015 |
| 6  | 0.00004166  | 0.00002026  | 0.00001632  |
| 7  | 0.0000115   | -0.00002406 | -0.00001643 |
| 7  | -0.00002033 | -0.00001988 | -0.00003907 |
| 16 | 0.00001116  | 0.00000681  | 0.00001506  |
| 8  | 0.00000137  | 0.00001396  | 0.00000377  |
| 8  | -0.00001388 | -0.00002231 | 0.00001426  |
| 6  | -0.00000368 | 0.00000054  | -0.00000152 |
| 6  | -0.00000336 | -0.0000007  | 0.00000612  |
| 6  | 0.00000452  | -0.00000491 | 0.00000128  |
| 6  | -0.00000264 | 0.00000671  | 0.00000591  |
| 6  | -0.00000812 | -0.00001021 | 0.00001775  |
| 6  | -0.00000478 | 0.00000053  | -0.00000029 |
| 1  | 0.00000138  | 0.00000221  | 0.00000286  |
| 1  | -0.00000298 | -0.00000331 | 0.00000471  |
| 1  | -0.00000569 | -0.00000411 | 0.00001036  |
| 1  | -0.00000521 | -0.00000178 | 0.00001246  |
| 6  | -0.00000711 | -0.00000275 | 0.00000663  |
| 1  | -0.00000512 | -0.00001162 | 0.00000387  |
| 1  | -0.00000741 | -0.00000449 | 0.00000626  |
| 1  | -0.00000008 | -0.00000546 | 0.00000423  |
| 6  | -0.00000327 | 0.00001826  | -0.00002426 |
| 6  | -0.00000898 | -0.00000244 | 0.00001456  |
| 1  | -0.0000007  | -0.00000887 | 0.00001275  |
| 1  | -0.00000766 | -0.00000065 | 0.00000069  |
| 6  | -0.00000808 | 0.00000064  | 0.00000085  |



|    |              |              |              |
|----|--------------|--------------|--------------|
| 1  | -0.000000804 | -0.000000276 | 0.000000433  |
| 1  | -0.000000302 | 0.000000327  | 0.000001856  |
| 6  | -0.000000292 | -0.000000185 | 0.000001223  |
| 1  | -0.000000293 | 0.000000111  | 0.000001391  |
| 1  | -0.000000481 | -0.000000392 | 0.000000097  |
| 1  | -0.000000573 | -0.000000029 | 0.000001353  |
| 1  | -0.000000565 | -0.000000095 | 0.000000962  |
| 1  | -0.000000401 | 0.000000067  | 0.000001293  |
| 6  | -0.000000454 | 0.00000141   | 0.000001352  |
| 6  | 0.000000289  | 0.000000583  | 0.000001861  |
| 1  | 0.000000286  | 0.000000239  | 0.000000656  |
| 1  | 0.000000309  | 0.000000382  | 0.0000015    |
| 6  | 0.000000339  | 0.000000709  | 0.000001396  |
| 1  | -0.000000539 | 0.000000956  | -0.000000049 |
| 1  | -0.000000278 | 0.000000939  | 0.000001014  |
| 6  | 0.000000343  | 0.000000391  | 0.000000834  |
| 1  | 0.000000054  | 0.000000454  | 0.000000321  |
| 1  | -0.000000261 | 0.000000703  | 0.000000532  |
| 1  | -0.000000056 | 0.000000912  | 0.000001221  |
| 1  | 0.000000006  | 0.000000997  | 0.000000927  |
| 1  | -0.000000202 | 0.000000764  | 0.00000124   |
| 16 | 0.000000684  | 0.000003788  | 0.000004275  |
| 8  | -0.000000088 | -0.000001244 | -0.000001012 |
| 8  | 0.000000166  | -0.000000504 | -0.000001907 |
| 6  | 0.000002435  | 0.00000235   | -0.000002137 |
| 6  | 0.000002044  | -0.000001634 | 0.000002032  |
| 6  | -0.000004226 | 0.000001807  | 0.000003177  |
| 6  | -0.000003387 | 0.00000043   | 0.000000974  |
| 1  | -0.000001065 | 0.000000704  | -0.000000813 |
| 6  | 0.000002945  | -0.000003628 | 0.000002255  |
| 1  | 0.000001412  | 0.000000739  | -0.000000267 |
| 6  | 0.000000868  | 0.000003317  | -0.000003611 |
| 1  | 0.000000764  | 0.000000773  | -0.000000748 |
| 1  | 0.000000266  | 0.000002042  | -0.0000006   |
| 6  | 0.000000428  | -0.00000014  | 0.000001292  |
| 1  | 0.0000013    | 0.000000501  | -0.00000058  |
| 1  | 0.000000954  | 0.000001583  | 0.00000042   |
| 1  | -0.000000312 | 0.000001919  | -0.000000116 |
| 79 | 0.00000271   | -0.0000012   | -0.000005271 |
| 6  | -0.000000513 | 0.000001641  | 0.000000703  |
| 6  | -0.000000189 | -0.000000106 | -0.000001176 |
| 6  | 0.000000458  | -0.000000068 | -0.000001802 |
| 1  | 0.000000376  | -0.000000358 | -0.000001251 |
| 1  | 0.000000256  | -0.0000006   | -0.000000627 |

|   |              |              |              |
|---|--------------|--------------|--------------|
| 7 | -0.000000787 | 0.000000229  | -0.000000983 |
| 7 | -0.000000613 | -0.000000913 | 0.000000402  |
| 6 | 0.000000156  | 0.000000291  | -0.000002005 |
| 6 | 0.000000852  | -0.000000328 | -0.000000399 |
| 6 | -0.000000215 | -0.000000586 | 0.000000197  |
| 6 | 0.00000007   | -0.00000111  | -0.000000022 |
| 6 | -0.000001008 | -0.000000646 | 0.000000064  |
| 6 | -0.000000037 | -0.000000296 | -0.000000589 |
| 1 | -0.000000016 | -0.000000338 | -0.000000122 |
| 1 | -0.000000243 | -0.000000799 | -0.000000382 |
| 1 | -0.000000164 | -0.000000667 | -0.000000321 |
| 6 | 0.000000782  | -0.000000212 | -0.000000399 |
| 6 | -0.000000375 | 0.000000153  | -0.000000834 |
| 6 | 0.000000031  | 0.000000534  | -0.000000726 |
| 6 | 0.000000694  | -0.000000472 | -0.000000864 |
| 6 | 0.000000541  | 0.00000031   | -0.000000617 |
| 6 | 0.000000417  | 0.000000686  | 0.000000101  |
| 1 | 0.000000017  | 0.000000178  | -0.000000833 |
| 1 | 0.000000615  | 0.000000719  | -0.000001121 |
| 1 | 0.000000565  | 0.000000328  | -0.000000917 |
| 6 | 0.000000696  | 0.000000435  | -0.000001291 |
| 6 | 0.000000374  | -0.000000719 | -0.000000776 |
| 6 | -0.000000011 | -0.000000405 | -0.000000629 |
| 1 | -0.000000118 | -0.000000596 | -0.000000201 |
| 1 | 0.000000153  | -0.000000503 | -0.000000949 |
| 1 | 0.00000005   | -0.000000704 | -0.000000833 |
| 1 | -0.000000107 | -0.000000208 | -0.000000842 |
| 1 | -0.000000166 | -0.000000021 | -0.000000472 |
| 1 | 0.00000003   | -0.00000018  | -0.000000232 |
| 1 | -0.000000049 | -0.000000202 | -0.000000341 |
| 6 | 0.000000404  | 0.000000893  | -0.000000673 |
| 6 | 0.000000727  | 0.000000746  | -0.000000878 |
| 6 | 0.000000646  | -0.000000289 | -0.000001074 |
| 1 | 0.000000412  | 0.000000063  | -0.000000525 |
| 1 | 0.000000649  | 0.000000783  | -0.000000083 |
| 1 | 0.000000434  | 0.000000578  | -0.000000094 |
| 1 | 0.000000479  | 0.000000914  | -0.000000367 |
| 1 | 0.000000522  | 0.000000252  | -0.000000984 |
| 1 | 0.00000068   | 0.000000702  | -0.000001055 |
| 1 | 0.000000701  | 0.000000528  | -0.000000093 |
| 6 | 0.000000543  | -0.000001137 | -0.000000476 |
| 6 | -0.000000078 | -0.000001006 | 0.000000104  |
| 6 | 0.000000052  | -0.000000856 | -0.000000558 |
| 1 | -0.000000344 | 0.000000026  | -0.000000085 |

|   |              |              |              |
|---|--------------|--------------|--------------|
| 1 | -0.000000105 | -0.000000482 | -0.000000259 |
| 1 | -0.000000152 | -0.000000845 | -0.000000357 |
| 1 | -0.000000297 | -0.000000598 | -0.000000261 |
| 1 | -0.000000231 | -0.000000853 | -0.000000732 |
| 1 | -0.000000315 | -0.000001013 | -0.000000542 |
| 1 | -0.000000282 | -0.000000992 | -0.000000621 |
| 6 | 0.000000028  | 0.000000712  | 0.000000037  |
| 6 | 0.000000363  | 0.000000066  | -0.000000652 |
| 6 | 0.000001186  | -0.000000146 | -0.000000461 |
| 1 | 0.000000347  | -0.000000485 | -0.000000335 |
| 1 | 0.000000373  | -0.000000306 | -0.000000764 |
| 1 | 0.000000354  | 0.000000172  | -0.000000918 |
| 1 | 0.000000226  | -0.000000176 | -0.000000767 |
| 1 | -0.000000229 | -0.000000038 | -0.000000262 |
| 1 | -0.000000063 | 0.000000112  | -0.000000255 |
| 1 | 0.000000438  | 0.000000047  | -0.000000273 |
| 8 | -0.000000003 | -0.000001896 | 0.000001739  |
| 6 | 0.000000504  | 0.000000667  | 0.000000163  |
| 6 | -0.000000064 | -0.000002698 | 0.000000623  |
| 6 | 0.000000203  | -0.000000115 | 0.000000072  |
| 6 | -0.000000073 | -0.000000791 | 0.000000572  |
| 6 | -0.00000002  | -0.000000838 | -0.000000375 |
| 6 | -0.000000795 | 0.000000327  | 0.000001083  |
| 6 | -0.000002297 | -0.000003934 | 0.000002319  |
| 6 | 0.000000308  | 0.000001012  | -0.000000131 |
| 1 | -0.000000574 | -0.000000601 | 0.000000154  |
| 1 | -0.000000555 | -0.000000956 | 0.000000269  |
| 1 | -0.000000575 | -0.000000909 | 0.000000399  |
| 1 | -0.000000843 | -0.000000721 | 0.000000664  |
| 1 | -0.000000887 | -0.000000332 | 0.000000418  |
| 1 | 0.000000075  | 0.000000045  | 0.000000638  |
| 7 | 0.000000057  | 0.000003994  | -0.000000085 |
| 1 | -0.000000442 | -0.000002594 | 0.000000333  |

Zero-point correction=

1.241175 (Hartree/Particle)

Thermal correction to Energy=

1.318139

Thermal correction to Enthalpy=

1.319083

Thermal correction to Gibbs Free Energy=

1.114818

Sum of electronic and zero-point Energies=

-3873.757320

Sum of electronic and thermal Energies=

-3873.680356

Sum of electronic and thermal Enthalpies=

-3873.679412

Sum of electronic and thermal Free Energies=

-3873.883677

A-TSb11

|   |              |             |             |
|---|--------------|-------------|-------------|
| 6 | -0.000000461 | 0.000000077 | 0.000000136 |
|---|--------------|-------------|-------------|

|    |              |              |             |
|----|--------------|--------------|-------------|
| 6  | 0.000000425  | 0.000000179  | 0.000000237 |
| 7  | 0.000000016  | -0.000000164 | 0.000000163 |
| 7  | 0.000000471  | 0.000000102  | 0.000000742 |
| 16 | 0.00000027   | -0.000000248 | 0.000000717 |
| 8  | 0.000000452  | 0.000000096  | 0.000000653 |
| 8  | 0.000000436  | -0.000000121 | 0.000000448 |
| 6  | 0.000000581  | -0.000000623 | 0.000000886 |
| 6  | 0.000000462  | -0.000000423 | 0.000000745 |
| 6  | 0.000000893  | -0.000000552 | 0.000000918 |
| 6  | 0.000000727  | -0.000000989 | 0.000000613 |
| 6  | 0.00000036   | -0.000000915 | 0.000000278 |
| 6  | 0.00000054   | -0.000000607 | 0.000000594 |
| 1  | 0.000000539  | -0.00000018  | 0.000000755 |
| 1  | 0.000000776  | -0.000000593 | 0.000000843 |
| 1  | 0.000000547  | -0.000000946 | 0.00000023  |
| 1  | 0.000000434  | -0.000000374 | 0.000000201 |
| 6  | 0.000000824  | -0.000001105 | 0.000000545 |
| 1  | 0.000000722  | -0.000001149 | 0.000000553 |
| 1  | 0.000000845  | -0.000001051 | 0.000000785 |
| 1  | 0.000000666  | -0.000001104 | 0.000000562 |
| 6  | 0.000000214  | -0.000000121 | 0.00000042  |
| 6  | 0.000000244  | 0.000000201  | 0.000000418 |
| 1  | 0.000000355  | -0.000000156 | 0.000000399 |
| 1  | 0.000000167  | -0.000000208 | 0.000000194 |
| 6  | 0.000000196  | 0.000000182  | 0.000000422 |
| 1  | 0.00000027   | 0.000000331  | 0.000000568 |
| 1  | 0.000000069  | 0.000000404  | 0.000000309 |
| 6  | 0.000000188  | 0.00000044   | 0.000000536 |
| 1  | 0.000000114  | 0.000000137  | 0.000000241 |
| 1  | 0.00000028   | 0.000000068  | 0.000000536 |
| 1  | 0.000000151  | 0.000000429  | 0.000000505 |
| 1  | 0.000000214  | 0.000000514  | 0.000000675 |
| 1  | 0.000000027  | 0.000000548  | 0.000000432 |
| 6  | 0.000000173  | 0.000000613  | 0.00000062  |
| 6  | 0.000000126  | 0.000000707  | 0.000000508 |
| 1  | 0.000000164  | 0.000000593  | 0.000000716 |
| 1  | 0.000000257  | 0.00000041   | 0.000000601 |
| 6  | 0.000000006  | 0.000000906  | 0.000000646 |
| 1  | -0.00000007  | 0.000000754  | 0.00000052  |
| 1  | -0.000000036 | 0.000000668  | 0.000000351 |
| 6  | -0.000000063 | 0.000001085  | 0.000000551 |
| 1  | 0.000000162  | 0.000000855  | 0.000000683 |
| 1  | 0.000000123  | 0.000000978  | 0.000000885 |
| 1  | -0.000000041 | 0.000001274  | 0.000000711 |

|    |              |              |              |
|----|--------------|--------------|--------------|
| 1  | -0.00000013  | 0.000001232  | 0.000000605  |
| 1  | -0.000000133 | 0.000001123  | 0.000000483  |
| 16 | 0.000000438  | 0.000000505  | 0.000000899  |
| 8  | 0.000000382  | 0.000000294  | 0.000000792  |
| 8  | -0.000000071 | 0.000000568  | 0.00000043   |
| 6  | 0.000000201  | -0.000000047 | 0.000000626  |
| 6  | 0.000000186  | -0.000000031 | 0.000000378  |
| 6  | 0.000000212  | 0.000000322  | 0.000000319  |
| 6  | 0.00000033   | -0.000000051 | 0.000000254  |
| 1  | 0.000000218  | -0.000000221 | 0.000000472  |
| 6  | 0.000000033  | 0.000000196  | 0.000000264  |
| 1  | 0.000000111  | 0.000000051  | 0.00000049   |
| 6  | 0.00000024   | -0.000000021 | 0.000000235  |
| 1  | 0.000000215  | -0.00000037  | 0.000000193  |
| 1  | 0.000000073  | 0.000000302  | 0.000000303  |
| 6  | 0.000000115  | -0.000000252 | 0.00000018   |
| 1  | 0.000000138  | -0.000000331 | -0.000000006 |
| 1  | 0.000000062  | -0.00000004  | 0.000000042  |
| 1  | 0.000000274  | -0.000000249 | 0.00000025   |
| 79 | -0.000000044 | 0.00000018   | -0.000000036 |
| 6  | -0.000000382 | 0.000000097  | -0.000000313 |
| 6  | -0.000000253 | -0.000000317 | -0.000000687 |
| 6  | -0.000000336 | -0.000000395 | -0.000000774 |
| 1  | -0.000000405 | -0.000000401 | -0.000000946 |
| 1  | -0.000000315 | -0.000000388 | -0.000000806 |
| 7  | -0.000000183 | -0.000000293 | -0.000000576 |
| 7  | -0.000000283 | -0.000000248 | -0.000000576 |
| 6  | -0.000000104 | -0.000000112 | -0.000000401 |
| 6  | -0.000000025 | -0.000000459 | -0.000000251 |
| 6  | -0.000000218 | -0.00000001  | -0.000000454 |
| 6  | 0.000000061  | -0.000000282 | -0.000000213 |
| 6  | -0.000000157 | 0.000000063  | -0.000000204 |
| 6  | -0.000000069 | -0.000000159 | -0.000000174 |
| 1  | 0.000000068  | -0.000000488 | -0.000000147 |
| 1  | -0.000000202 | 0.000000218  | -0.000000218 |
| 1  | 0.000000001  | -0.000000113 | -0.000000076 |
| 6  | -0.000000029 | -0.000000196 | -0.000000554 |
| 6  | -0.000000374 | -0.000000035 | -0.000000617 |
| 6  | -0.000000158 | -0.000000512 | -0.000000408 |
| 6  | -0.000000447 | -0.000000016 | -0.000000639 |
| 6  | -0.000000023 | -0.000000043 | -0.000000623 |
| 6  | -0.000000248 | -0.000000181 | -0.000000564 |
| 1  | -0.000000392 | 0.00000016   | -0.000000688 |
| 1  | -0.000000103 | -0.000000525 | -0.000000481 |

|   |              |              |              |
|---|--------------|--------------|--------------|
| 1 | -0.000000229 | -0.000000157 | -0.000000613 |
| 6 | -0.000000547 | 0.000000154  | -0.000000077 |
| 6 | -0.000000646 | 0.000000112  | -0.000000975 |
| 6 | -0.000000535 | 0.000000374  | -0.000000575 |
| 1 | -0.00000004  | 0.000000187  | -0.000000647 |
| 1 | -0.000000615 | -0.000000004 | -0.000001022 |
| 1 | -0.000000698 | 0.000000265  | -0.000001058 |
| 1 | -0.000000669 | 0.000000016  | -0.000001022 |
| 1 | -0.00000038  | 0.000000322  | -0.000000443 |
| 1 | -0.000000532 | 0.000000483  | -0.000000063 |
| 1 | -0.000000577 | 0.000000524  | -0.000000688 |
| 6 | -0.000000053 | -0.000000729 | -0.000000048 |
| 6 | 0.000000043  | -0.000000609 | -0.000000226 |
| 6 | -0.000000007 | -0.000000887 | -0.000000603 |
| 1 | -0.000000025 | -0.000000687 | -0.000000469 |
| 1 | 0.000000154  | -0.000000542 | -0.000000109 |
| 1 | 0.000000175  | -0.000000845 | -0.000000216 |
| 1 | 0.000000188  | -0.000000609 | -0.000000256 |
| 1 | -0.000000151 | -0.000000084 | -0.000000764 |
| 1 | -0.000000049 | -0.000000825 | -0.000000694 |
| 1 | 0            | -0.000001011 | -0.000000598 |
| 6 | -0.000000025 | 0.000000308  | -0.000000442 |
| 6 | -0.000000251 | 0.000000374  | -0.000000032 |
| 6 | -0.000000455 | 0.000000029  | -0.000000583 |
| 1 | -0.000000427 | 0.000000118  | -0.000000053 |
| 1 | -0.000000239 | 0.000000309  | -0.000000174 |
| 1 | -0.000000454 | 0.000000575  | -0.000000353 |
| 1 | -0.000000344 | 0.000000557  | -0.000000228 |
| 1 | -0.000000494 | 0.000000013  | -0.000000075 |
| 1 | -0.000000496 | 0.000000382  | -0.000000564 |
| 1 | -0.000000573 | 0.000000414  | -0.000000721 |
| 6 | 0.000000125  | -0.000000643 | -0.000000218 |
| 6 | 0.000000048  | -0.000000839 | -0.000000437 |
| 6 | 0.000000187  | -0.000000671 | -0.000000006 |
| 1 | 0.000000054  | -0.000000636 | -0.000000436 |
| 1 | -0.00000001  | -0.000000747 | -0.000000062 |
| 1 | 0.000000059  | -0.000000954 | -0.000000503 |
| 1 | 0.000000102  | -0.000000834 | -0.000000373 |
| 1 | 0.000000219  | -0.000000493 | 0.000000019  |
| 1 | 0.000000261  | -0.000000729 | -0.000000008 |
| 1 | 0.000000228  | -0.000000845 | -0.000000156 |
| 6 | 0.000000075  | 0.000000523  | 0.000000051  |
| 6 | -0.000000615 | 0.000000321  | 0.000000027  |
| 6 | -0.000000031 | 0.000000774  | -0.000000012 |

|   |              |             |              |
|---|--------------|-------------|--------------|
| 6 | -0.000000239 | 0.000000828 | 0.000000493  |
| 6 | -0.000000068 | 0.000000809 | 0.000000135  |
| 6 | -0.000000246 | 0.000000897 | -0.000000186 |
| 6 | -0.000000096 | 0.000000422 | 0.000000344  |
| 6 | -0.000000121 | 0.000000225 | -0.000000133 |
| 1 | -0.000000136 | 0.000000689 | -0.000000136 |
| 1 | -0.000000281 | 0.000001061 | 0.000000005  |
| 1 | -0.000000343 | 0.000001187 | 0.000000039  |
| 1 | -0.000000126 | 0.000000948 | -0.000000019 |
| 1 | -0.000000147 | 0.000000328 | -0.000000054 |
| 1 | -0.000000226 | 0.000000021 | -0.000000156 |
| 7 | -0.000000029 | 0.000000353 | -0.000000112 |
| 1 | -0.000000025 | 0.000000189 | -0.000000199 |

|                                              |                             |
|----------------------------------------------|-----------------------------|
| Zero-point correction=                       | 1.232650 (Hartree/Particle) |
| Thermal correction to Energy=                | 1.308661                    |
| Thermal correction to Enthalpy=              | 1.309605                    |
| Thermal correction to Gibbs Free Energy=     | 1.110452                    |
| Sum of electronic and zero-point Energies=   | -3798.423675                |
| Sum of electronic and thermal Energies=      | -3798.347663                |
| Sum of electronic and thermal Enthalpies=    | -3798.346719                |
| Sum of electronic and thermal Free Energies= | -3798.545873                |

A-11b

|    |              |              |              |
|----|--------------|--------------|--------------|
| 6  | 0.000001532  | -0.000001659 | 0.000000564  |
| 6  | -0.000004398 | -0.000001249 | -0.000001863 |
| 7  | -0.000000381 | 0.000002366  | 0.000011612  |
| 7  | -0.000001207 | -0.000007821 | -0.000001447 |
| 16 | 0.000000094  | -0.000000662 | 0.000000126  |
| 8  | -0.000000377 | 0.00000232   | 0.000001424  |
| 8  | -0.000001355 | 0.000001095  | -0.000002906 |
| 6  | -0.000000336 | 0.000001574  | 0.000000941  |
| 6  | 0.000000061  | 0.000002467  | 0.000002362  |
| 6  | 0.000000342  | 0.00000219   | 0.000002619  |
| 6  | 0.000000177  | 0.000002984  | 0.00000289   |
| 6  | 0.000000096  | 0.000002777  | 0.000001559  |
| 6  | -0.000000344 | 0.000001747  | 0.000000476  |
| 1  | 0.000000179  | 0.000001215  | 0.000003077  |
| 1  | 0.000000031  | 0.000002142  | 0.00000355   |
| 1  | 0.000000756  | 0.000003137  | 0.000001453  |
| 1  | 0.000000661  | 0.000002303  | 0.000001176  |
| 6  | 0.000000753  | 0.000003504  | 0.000003001  |
| 1  | 0.000000766  | 0.000003745  | 0.000002481  |
| 1  | 0.000000612  | 0.000003425  | 0.000003431  |
| 1  | 0.000000531  | 0.000003091  | 0.000002477  |

|    |              |              |              |
|----|--------------|--------------|--------------|
| 6  | -0.000001107 | -0.000000812 | 0.000002401  |
| 6  | 0.000000073  | -0.000000462 | 0.000001643  |
| 1  | 0.000001095  | -0.00000005  | 0.000000092  |
| 1  | 0.000000269  | -0.000000062 | 0.000000983  |
| 6  | -0.00000061  | -0.000000685 | 0.000002286  |
| 1  | -0.000001197 | -0.000001014 | 0.000001932  |
| 1  | -0.000000128 | -0.000001717 | 0.000000072  |
| 6  | -0.000001006 | -0.000002301 | 0.000003177  |
| 1  | -0.000000411 | -0.000001307 | 0.000002037  |
| 1  | -0.000000783 | -0.000001013 | 0.000002832  |
| 1  | -0.000001235 | -0.000001827 | 0.00000266   |
| 1  | -0.000001286 | -0.000002193 | 0.000002749  |
| 1  | -0.000000987 | -0.000002239 | 0.000001478  |
| 6  | 0.000000077  | 0.000001129  | -0.000000137 |
| 6  | -0.000000939 | -0.000002971 | -0.000000151 |
| 1  | -0.000001093 | -0.000001512 | 0.000001138  |
| 1  | 0.000000945  | -0.000000269 | 0.000000506  |
| 6  | -0.000001135 | -0.000001883 | 0.000000688  |
| 1  | -0.00000048  | -0.000001394 | -0.000000134 |
| 1  | -0.000000386 | -0.000002775 | 0.000000642  |
| 6  | -0.000000916 | -0.000003291 | 0.000000678  |
| 1  | -0.00000081  | -0.000001832 | 0.000001738  |
| 1  | -0.000000897 | -0.000002192 | 0.000001193  |
| 1  | -0.000001285 | -0.000003458 | 0.000001237  |
| 1  | -0.00000123  | -0.000003202 | 0.000000377  |
| 1  | -0.000001121 | -0.000003115 | 0.000000704  |
| 16 | 0.000001273  | 0.000009154  | 0.000007825  |
| 8  | 0.000003586  | -0.000000151 | -0.000003966 |
| 8  | -0.000000083 | -0.000004184 | -0.000003587 |
| 6  | -0.000000682 | 0.000000283  | -0.000002568 |
| 6  | 0.00000047   | -0.000000772 | 0.000000435  |
| 6  | -0.000000105 | 0.000001075  | 0.000003421  |
| 6  | -0.000000608 | 0.000000346  | 0.000001373  |
| 1  | -0.00000044  | -0.000000411 | 0.00000142   |
| 6  | 0.000000117  | 0.000000572  | 0.000001479  |
| 1  | 0.000000923  | 0.000001485  | 0.000000202  |
| 6  | 0.000000093  | -0.000000022 | -0.000000136 |
| 1  | -0.000000461 | -0.000000581 | 0.000000935  |
| 1  | 0.000000178  | 0.000001426  | 0.000001543  |
| 6  | -0.000000587 | 0.000001248  | 0.000002107  |
| 1  | -0.00000039  | 0.000000778  | 0.000002629  |
| 1  | 0.000000566  | 0.000000956  | 0.00000275   |
| 1  | 0.000000367  | 0.000001362  | 0.000002051  |
| 79 | 0.00000222   | 0.000001698  | -0.000001845 |



|   |              |              |              |
|---|--------------|--------------|--------------|
| 6 | -0.000002904 | -0.000000756 | -0.000000288 |
| 6 | -0.000000792 | -0.000000053 | -0.000001102 |
| 6 | 0.000000692  | 0.000000963  | -0.000001791 |
| 1 | 0.000000798  | 0.000000828  | -0.000002785 |
| 1 | 0.000000292  | -0.000000089 | -0.000000566 |
| 7 | 0.000002907  | -0.000000165 | 0.000000822  |
| 7 | 0.000000237  | -0.000000231 | 0.000000096  |
| 6 | -0.000001975 | 0.000000804  | -0.000001632 |
| 6 | 0.000000383  | -0.000001809 | 0.000001284  |
| 6 | -0.000000787 | -0.000000608 | 0.000001444  |
| 6 | -0.000000085 | 0.000000458  | 0.000002377  |
| 6 | -0.000001124 | -0.000002257 | 0.000000858  |
| 6 | 0.000000026  | -0.000000255 | -0.000000166 |
| 1 | -0.000000008 | 0.000000413  | 0.00000152   |
| 1 | -0.000000751 | -0.00000178  | 0.000001024  |
| 1 | -0.000000603 | -0.00000119  | 0.000002344  |
| 6 | 0.000001504  | 0.00000109   | -0.000003161 |
| 6 | -0.000000222 | -0.000002165 | -0.00000211  |
| 6 | 0.000000787  | 0.000002036  | -0.000001017 |
| 6 | 0.000001014  | 0.000001047  | -0.00000289  |
| 6 | 0.000000174  | 0.000000649  | -0.000002383 |
| 6 | 0.000000793  | 0.000001171  | -0.000003688 |
| 1 | 0.000000487  | 0.000000052  | -0.000003333 |
| 1 | 0.000001186  | 0.000002243  | -0.000002282 |
| 1 | 0.000001026  | 0.000001206  | -0.000003496 |
| 6 | -0.000001002 | 0.000002788  | -0.000002047 |
| 6 | 0.00000102   | -0.0000028   | -0.000003413 |
| 6 | 0.00000172   | -0.000002535 | -0.000003546 |
| 1 | -0.000000425 | -0.00000042  | -0.000002133 |
| 1 | 0.000000424  | -0.000000355 | -0.000003385 |
| 1 | 0.000000271  | -0.000001284 | -0.000003494 |
| 1 | -0.000000174 | 0.000000005  | -0.000004535 |
| 1 | -0.00000108  | -0.000001171 | -0.000002325 |
| 1 | -0.000000435 | -0.000000688 | -0.000002376 |
| 1 | -0.00000013  | -0.000002095 | -0.000002855 |
| 6 | 0.000001205  | 0.00000108   | -0.000001753 |
| 6 | 0.000000691  | 0.000002099  | -0.000001113 |
| 6 | 0.000000978  | 0.000002909  | -0.000001769 |
| 1 | 0.000000738  | 0.000001517  | -0.00000102  |
| 1 | 0.000000908  | 0.000002033  | -0.000000853 |
| 1 | 0.000000983  | 0.00000276   | -0.000000391 |
| 1 | 0.000001222  | 0.000002583  | -0.00000108  |
| 1 | 0.000000956  | 0.000002331  | -0.000001953 |
| 1 | 0.000001262  | 0.000002713  | -0.000002358 |

|   |              |              |              |
|---|--------------|--------------|--------------|
| 1 | 0.000001158  | 0.000003021  | -0.000001422 |
| 6 | -0.000002861 | 0.000000001  | -0.000000899 |
| 6 | 0.000000979  | -0.000003416 | -0.000000366 |
| 6 | 0.000000722  | -0.000002995 | 0.000000252  |
| 1 | -0.000000779 | -0.000000974 | -0.000000083 |
| 1 | -0.000001131 | -0.000001496 | -0.000000253 |
| 1 | -0.000000539 | -0.000002498 | -0.000000596 |
| 1 | -0.000001517 | -0.000002623 | 0.000000705  |
| 1 | -0.000000592 | -0.000001714 | -0.000000942 |
| 1 | -0.000000844 | -0.000001678 | -0.000000681 |
| 1 | -0.000000321 | -0.000002777 | -0.000001091 |
| 6 | 0.000001145  | 0.000000595  | 0.000000329  |
| 6 | 0.000000312  | 0.00000147   | 0.000000493  |
| 6 | -0.000000426 | 0.000001476  | 0.000002123  |
| 1 | 0.000000836  | 0.00000126   | 0.000000576  |
| 1 | 0.000000181  | 0.000001029  | 0.000000763  |
| 1 | 0.000000386  | 0.000001995  | 0.000001176  |
| 1 | 0.000000097  | 0.000001071  | 0.000001541  |
| 1 | 0.0000004    | 0.000001435  | 0.000001927  |
| 1 | 0.000000122  | 0.000001647  | 0.000002635  |
| 1 | 0.000000755  | 0.000001687  | 0.00000107   |
| 6 | -0.000000806 | -0.000000942 | -0.00000125  |
| 6 | -0.000000303 | -0.000000428 | -0.000003077 |
| 6 | 0.000000641  | -0.00000108  | -0.000002532 |
| 6 | -0.000000048 | -0.000001819 | -0.000002953 |
| 6 | -0.000000456 | -0.000002336 | -0.000001681 |
| 6 | 0.000000699  | -0.000000904 | -0.000001703 |
| 6 | 0.000003087  | 0.000000009  | -0.000001223 |
| 6 | -0.000001346 | 0.000003217  | -0.000003755 |
| 1 | 0.000000122  | -0.000000937 | -0.000003324 |
| 1 | -0.00000027  | -0.000002332 | -0.000003192 |
| 1 | -0.000000665 | -0.000002788 | -0.000002041 |
| 1 | -0.000000684 | -0.000001138 | -0.000001074 |
| 1 | -0.000001448 | 0.000001321  | 0.000000511  |
| 1 | 0.000000994  | -0.000000064 | -0.000000164 |
| 7 | 0.000002506  | -0.000003069 | -0.000001872 |
| 1 | -0.000000542 | 0.000001599  | -0.000002579 |

|                                            |                             |
|--------------------------------------------|-----------------------------|
| Zero-point correction=                     | 1.235200 (Hartree/Particle) |
| Thermal correction to Energy=              | 1.310900                    |
| Thermal correction to Enthalpy=            | 1.311844                    |
| Thermal correction to Gibbs Free Energy=   | 1.111746                    |
| Sum of electronic and zero-point Energies= | -3798.471962                |
| Sum of electronic and thermal Energies=    | -3798.396262                |
| Sum of electronic and thermal Enthalpies=  | -3798.395318                |

Sum of electronic and thermal Free Energies= -3798.595416

A-TSb1

|    |              |              |              |
|----|--------------|--------------|--------------|
| 6  | -0.000001006 | 0.000001275  | 0.000002027  |
| 6  | -0.000000034 | -0.000004645 | -0.000001113 |
| 7  | 0.000000069  | 0.000001076  | -0.000000122 |
| 7  | 0.000000648  | 0.000003128  | -0.000000187 |
| 16 | -0.000002065 | 0.000002504  | 0.000001823  |
| 8  | 0.000001004  | 0.000000201  | 0.000001829  |
| 8  | 0.000000954  | 0.000000177  | 0.000001429  |
| 6  | 0.000000778  | 0.000001325  | 0.00000191   |
| 6  | 0.000000261  | -0.000000797 | 0.000001739  |
| 6  | 0.000000435  | -0.000000349 | -0.000000343 |
| 6  | -0.000000657 | -0.000000292 | 0.000003554  |
| 6  | -0.000000886 | -0.000000749 | 0.000000472  |
| 6  | 0.000000172  | 0.000000652  | -0.000000025 |
| 1  | 0.000001385  | 0.000000179  | 0.000001655  |
| 1  | 0.00000141   | -0.000000274 | 0.000000058  |
| 1  | -0.000000611 | 0.000000069  | -0.000000279 |
| 1  | -0.000000689 | 0.000000663  | 0.000000978  |
| 6  | 0.000001547  | 0.000001423  | -0.000002562 |
| 1  | 0.000001503  | 0.000000871  | 0.000000107  |
| 1  | 0.000000359  | -0.000000885 | -0.000000414 |
| 1  | -0.000000445 | 0.000000043  | -0.000000867 |
| 6  | 0.00000141   | -0.00000005  | 0.000001186  |
| 6  | 0.000001975  | -0.000000093 | 0.000000073  |
| 1  | 0.000001594  | -0.000000076 | 0.000001135  |
| 1  | 0.000000545  | 0.000000164  | 0.000000213  |
| 6  | 0.000002556  | -0.000000544 | 0.000000614  |
| 1  | 0.000001925  | 0.000000015  | 0.000001136  |
| 1  | 0.000001192  | -0.000000217 | 0.000000385  |
| 6  | 0.000003082  | -0.000000043 | 0.000000213  |
| 1  | 0.000002617  | -0.000000345 | -0.000000006 |
| 1  | 0.000002744  | -0.000000278 | 0.000000821  |
| 1  | 0.000003682  | -0.000000841 | 0.000000202  |
| 1  | 0.000003193  | -0.000000389 | 0.000001018  |
| 1  | 0.00000281   | -0.000000989 | -0.000000004 |
| 6  | -0.000000049 | 0.000000037  | 0.000001281  |
| 6  | -0.000001148 | 0.000000906  | 0.000000467  |
| 1  | -0.00000173  | 0.000000069  | 0.000001482  |
| 1  | -0.000001148 | 0.000000342  | 0.000000072  |
| 6  | -0.000002811 | 0.000001622  | 0.000001279  |
| 1  | -0.000001567 | 0.000000905  | 0.000000481  |
| 1  | -0.000001598 | 0.000001291  | 0.000001652  |

|    |              |              |              |
|----|--------------|--------------|--------------|
| 6  | -0.000003394 | 0.00000139   | 0.000001627  |
| 1  | -0.000002509 | 0.000000939  | 0.000001165  |
| 1  | -0.000002612 | 0.000000902  | 0.000000705  |
| 1  | -0.000003672 | 0.000001511  | 0.000001559  |
| 1  | -0.000003081 | 0.000001702  | 0.000002101  |
| 1  | -0.000002785 | 0.000001563  | 0.000001729  |
| 16 | -0.000001452 | 0.000000344  | -0.000000872 |
| 8  | -0.000000831 | -0.000000052 | -0.000000831 |
| 8  | -0.000001035 | 0.000000504  | 0.000002035  |
| 6  | -0.000000174 | 0.000001366  | 0.000000769  |
| 6  | 0.000000458  | 0.000000868  | 0.000001629  |
| 6  | 0.000000843  | 0.000000943  | 0.000001185  |
| 6  | 0.000001959  | 0.000000811  | 0.000000595  |
| 1  | 0.000001058  | -0.000000249 | 0.000001158  |
| 6  | 0.000000161  | 0.000000656  | 0.000002011  |
| 1  | -0.000000494 | 0.000000859  | 0.00000164   |
| 6  | 0.000001139  | -0.000001698 | 0.000001758  |
| 1  | 0.000002425  | -0.000000231 | 0.000001442  |
| 1  | 0.000001008  | 0.000000358  | 0.000002263  |
| 6  | 0.000002417  | -0.00000133  | 0.000001747  |
| 1  | 0.000001956  | 0.000001706  | 0.000002346  |
| 1  | 0.000002183  | 0.000001049  | 0.000001377  |
| 1  | 0.000002071  | 0.000000903  | 0.000003279  |
| 79 | -0.000000611 | -0.000001736 | -0.000002188 |
| 6  | -0.000000596 | -0.000001098 | 0.000001764  |
| 6  | -0.000000079 | -0.000001392 | -0.000002387 |
| 6  | -0.000001078 | -0.000001322 | -0.000002337 |
| 1  | -0.000001418 | -0.000000503 | -0.000002796 |
| 1  | 0.000000191  | -0.000001202 | -0.000002992 |
| 7  | -0.000000123 | 0.000000927  | -0.000002024 |
| 7  | -0.000000681 | -0.000000082 | -0.000002473 |
| 6  | 0.000000781  | -0.000001821 | -0.000002427 |
| 6  | 0.000002035  | -0.0000009   | -0.000001637 |
| 6  | 0.000000539  | -0.000001125 | -0.000001513 |
| 6  | 0.000002032  | -0.000001304 | -0.00000179  |
| 6  | 0.000002011  | -0.000001147 | -0.0000023   |
| 6  | 0.000002464  | -0.000001416 | -0.000001767 |
| 1  | 0.000002196  | -0.000001323 | -0.000001101 |
| 1  | 0.000002358  | -0.000001019 | -0.00000114  |
| 1  | 0.000002926  | -0.000001418 | -0.000001523 |
| 6  | -0.000001691 | -0.000001385 | -0.000001463 |
| 6  | -0.000001035 | -0.000000601 | -0.000001198 |
| 6  | -0.000002375 | 0.000000581  | -0.000001154 |
| 6  | -0.000002887 | -0.000000153 | -0.000000913 |

|   |              |              |              |
|---|--------------|--------------|--------------|
| 6 | -0.0000029   | -0.00000017  | -0.000001143 |
| 6 | -0.000003053 | 0.000000363  | -0.000000973 |
| 1 | -0.000002852 | 0.000000474  | -0.000001328 |
| 1 | -0.000003137 | 0.000000746  | -0.000000861 |
| 1 | -0.00000351  | 0.000000616  | -0.000000717 |
| 6 | -0.000002265 | -0.000000601 | -0.000002022 |
| 6 | -0.000001586 | -0.000000685 | -0.000002602 |
| 6 | -0.000002587 | -0.000000145 | -0.000001803 |
| 1 | -0.000000363 | 0.000000373  | -0.000001673 |
| 1 | -0.000002031 | -0.000000909 | -0.000002801 |
| 1 | -0.000001513 | -0.000000057 | -0.000002929 |
| 1 | -0.000002356 | -0.000000778 | -0.000002358 |
| 1 | 0.000000326  | -0.000000243 | -0.000001287 |
| 1 | -0.000001572 | 0            | -0.000001344 |
| 1 | -0.000001054 | -0.000000693 | -0.000001655 |
| 6 | -0.000002037 | -0.000000273 | -0.000001431 |
| 6 | -0.000001798 | 0.000000289  | -0.000000476 |
| 6 | -0.000001909 | -0.000000272 | -0.000001539 |
| 1 | -0.00000115  | -0.000000125 | -0.000001393 |
| 1 | -0.000001878 | 0.000000388  | -0.000000036 |
| 1 | -0.000001891 | 0.000000437  | -0.000000674 |
| 1 | -0.000002523 | 0.000000476  | -0.000000499 |
| 1 | -0.000002114 | -0.000000302 | -0.00000233  |
| 1 | -0.000002741 | -0.000000026 | -0.000001971 |
| 1 | -0.000001891 | -0.000000028 | -0.00000182  |
| 6 | 0.000001239  | -0.000001463 | -0.000001323 |
| 6 | 0.000001434  | -0.000000083 | -0.000001265 |
| 6 | 0.000001192  | -0.000001176 | -0.00000236  |
| 1 | 0.000000728  | -0.000000672 | -0.00000245  |
| 1 | 0.000001306  | -0.000000407 | -0.000000577 |
| 1 | 0.000001004  | -0.000000823 | -0.00000131  |
| 1 | 0.000001735  | -0.000001013 | -0.000001169 |
| 1 | 0.000001054  | -0.000001655 | -0.000002962 |
| 1 | 0.000001804  | -0.000001334 | -0.000002735 |
| 1 | 0.000000819  | -0.000001261 | -0.000002512 |
| 6 | 0.000000688  | -0.000000607 | -0.000001685 |
| 6 | 0.00000008   | -0.000001245 | -0.000002552 |
| 6 | 0.000001219  | -0.000001275 | -0.000000798 |
| 1 | 0.000000281  | -0.000000058 | -0.000001819 |
| 1 | 0.000000528  | -0.000001414 | -0.000002827 |
| 1 | 0.000000478  | -0.000001165 | -0.000002388 |
| 1 | 0.00000137   | -0.000001429 | -0.000002512 |
| 1 | 0.000000911  | -0.000000484 | -0.000000744 |
| 1 | 0.000001497  | -0.000000659 | -0.000001527 |

|   |              |              |              |
|---|--------------|--------------|--------------|
| 1 | 0.00000054   | -0.000000158 | -0.000001403 |
| 6 | -0.000004151 | 0.000002828  | 0.000000854  |
| 6 | 0.000000907  | 0.000000548  | 0.000002381  |
| 6 | 0.000000903  | 0.000001336  | 0.000003752  |
| 6 | 0.000000185  | 0.000001289  | 0.000003012  |
| 6 | -0.000000534 | 0.00000144   | 0.00000312   |
| 6 | -0.000000476 | 0.000001761  | 0.000002577  |
| 6 | -0.000000308 | 0.000001608  | 0.000007003  |
| 6 | 0.000000285  | 0.000001465  | 0.00000207   |
| 1 | 0.000001082  | 0.000001137  | 0.000003509  |
| 1 | 0.00000023   | 0.000001483  | 0.000003759  |
| 1 | -0.000000994 | 0.000001668  | 0.00000337   |
| 1 | -0.000001395 | 0.000001294  | 0.000003932  |
| 1 | 0.00000426   | -0.0000021   | 0.000003362  |
| 1 | 0.00000139   | 0.000001764  | 0.000001885  |
| 7 | 0.00000252   | 0.000000659  | 0.00000339   |
| 1 | 0.000001852  | 0.000000676  | 0.000003086  |

|                                              |                             |
|----------------------------------------------|-----------------------------|
| Zero-point correction=                       | 1.232608 (Hartree/Particle) |
| Thermal correction to Energy=                | 1.308615                    |
| Thermal correction to Enthalpy=              | 1.309559                    |
| Thermal correction to Gibbs Free Energy=     | 1.110468                    |
| Sum of electronic and zero-point Energies=   | -3798.443083                |
| Sum of electronic and thermal Energies=      | -3798.367076                |
| Sum of electronic and thermal Enthalpies=    | -3798.366132                |
| Sum of electronic and thermal Free Energies= | -3798.565224                |

#### A-1b

|    |              |              |              |
|----|--------------|--------------|--------------|
| 6  | -0.000004673 | -0.000012836 | 0.000000449  |
| 6  | -0.000000444 | 0.000006979  | -0.000000612 |
| 7  | 0.00000186   | 0.00000536   | 0.00000076   |
| 7  | 0.000004443  | 0.000005993  | 0.000000262  |
| 16 | -0.000004224 | 0.000003948  | -0.000002384 |
| 8  | -0.000001827 | -0.000001937 | -0.000000061 |
| 8  | 0.000001795  | -0.000002418 | 0.000001075  |
| 6  | -0.000000216 | 0.000001947  | 0.000001116  |
| 6  | -0.000002895 | -0.000002596 | -0.000001975 |
| 6  | 0.000001232  | 0.000001491  | -0.000001433 |
| 6  | -0.000001089 | -0.000004292 | 0.000001319  |
| 6  | -0.000003013 | 0.00000154   | 0.000000062  |
| 6  | -0.00000088  | -0.000000044 | -0.000001104 |
| 1  | -0.000001977 | 0.000001577  | 0.00000019   |
| 1  | -0.000001721 | -0.000000422 | -0.00000042  |
| 1  | 0.000000143  | -0.000000882 | -0.000000159 |
| 1  | 0.000001459  | 0.000001214  | -0.000000588 |

|    |              |              |              |
|----|--------------|--------------|--------------|
| 6  | -0.000001273 | -0.000001029 | -0.000000216 |
| 1  | -0.000001025 | -0.000000004 | -0.000000744 |
| 1  | -0.000001536 | -0.000001041 | -0.000000561 |
| 1  | -0.000000367 | -0.000000842 | -0.000000056 |
| 6  | -0.000002775 | 0.000000018  | 0.000002023  |
| 6  | -0.000001591 | -0.000002503 | -0.000000821 |
| 1  | -0.000000125 | -0.000000295 | -0.000001711 |
| 1  | -0.000001887 | 0.000000013  | -0.000000734 |
| 6  | -0.000000177 | 0.000001582  | -0.000001441 |
| 1  | -0.000000393 | -0.000000563 | -0.000001475 |
| 1  | 0.000000016  | 0.000000644  | -0.000000747 |
| 6  | -0.000002471 | -0.000001902 | -0.000001371 |
| 1  | -0.000002855 | -0.000001072 | -0.000000357 |
| 1  | -0.000001478 | -0.000000531 | -0.000000262 |
| 1  | -0.00000138  | -0.000000364 | -0.000000321 |
| 1  | -0.000001076 | 0.000000048  | -0.000000395 |
| 1  | -0.000000595 | -0.000000005 | -0.000000109 |
| 6  | -0.000001735 | -0.000003062 | 0.000000776  |
| 6  | 0.000002239  | 0.000000241  | -0.000001646 |
| 1  | -0.000001127 | 0.000001086  | 0.000000031  |
| 1  | 0.000001377  | 0.000000634  | -0.000000607 |
| 6  | 0.00000129   | 0.000000738  | 0.000002518  |
| 1  | 0.000000631  | 0.000002057  | -0.000000811 |
| 1  | -0.000001167 | 0.000001571  | -0.000000022 |
| 6  | 0.000000838  | 0.000001561  | -0.000000017 |
| 1  | 0.000001085  | 0.00000107   | -0.000000047 |
| 1  | 0.000001578  | 0.000001269  | 0.000000242  |
| 1  | 0.000001212  | 0.000001375  | 0.000000076  |
| 1  | 0.000001378  | 0.000001767  | 0.000000338  |
| 1  | 0.000000924  | 0.000001826  | 0.000000111  |
| 16 | -0.000001189 | -0.000001094 | -0.000000345 |
| 8  | 0.000002584  | -0.000000534 | 0.000002993  |
| 8  | -0.00000101  | 0.000003254  | -0.000000253 |
| 6  | 0.000001924  | -0.000001078 | 0.000000764  |
| 6  | -0.000002211 | -0.000000107 | 0.000000885  |
| 6  | 0.000000335  | 0.000003341  | -0.000001751 |
| 6  | 0.000001246  | 0.000001496  | -0.000000701 |
| 1  | 0.000000761  | -0.000000213 | -0.000000225 |
| 6  | -0.000000062 | -0.000000565 | 0.000001148  |
| 1  | 0.000000578  | 0.000001265  | 0.000000575  |
| 6  | -0.000001889 | 0.000002659  | -0.000001122 |
| 1  | -0.000000668 | 0.000000853  | -0.000000821 |
| 1  | 0.000000026  | 0.000001799  | -0.000000435 |
| 6  | -0.000000318 | 0.000001081  | -0.000000701 |

|    |              |              |              |
|----|--------------|--------------|--------------|
| 1  | -0.000000296 | 0.000001863  | -0.000000489 |
| 1  | 0.000000023  | 0.000001226  | -0.000000407 |
| 1  | -0.000000856 | 0.000001292  | -0.000001086 |
| 79 | 0.000001161  | 0.000000829  | -0.000001105 |
| 6  | -0.000003427 | 0.000006305  | 0.000000104  |
| 6  | -0.000000231 | 0.000002411  | 0.000001054  |
| 6  | 0.000000481  | -0.000004245 | 0.000001216  |
| 1  | 0.00000184   | -0.000001683 | 0.000001005  |
| 1  | -0.000000074 | -0.000000639 | 0.000001534  |
| 7  | 0.000002582  | -0.000008416 | -0.000000265 |
| 7  | 0.000003786  | 0.000002673  | 0.000002583  |
| 6  | 0.000000023  | -0.000000949 | 0.000000498  |
| 6  | -0.000001585 | -0.000000771 | -0.000000399 |
| 6  | 0.000000218  | -0.000001045 | -0.000000166 |
| 6  | -0.000000988 | -0.000002565 | 0.000000904  |
| 6  | -0.000000092 | -0.000000368 | -0.000000351 |
| 6  | 0.000000247  | -0.000002156 | -0.000000029 |
| 1  | -0.000000487 | -0.00000151  | -0.000000272 |
| 1  | -0.000001027 | -0.000001234 | -0.000000541 |
| 1  | -0.000001044 | -0.000001407 | -0.000000194 |
| 6  | 0.00000185   | -0.000003932 | -0.000001286 |
| 6  | 0.000001061  | 0.00000032   | -0.000000499 |
| 6  | 0.000000799  | -0.000001089 | 0.000000318  |
| 6  | 0.000001755  | -0.000000032 | 0.000001818  |
| 6  | -0.000000189 | 0.000000717  | -0.000000048 |
| 6  | 0.000001608  | -0.000000085 | -0.000000057 |
| 1  | 0.000001186  | 0.000000074  | 0.000001396  |
| 1  | 0.000001337  | 0.000000244  | 0.000000936  |
| 1  | 0.000001977  | 0.000000569  | 0.000000654  |
| 6  | -0.00000175  | -0.000001882 | 0.000000265  |
| 6  | 0.000000889  | -0.000000113 | 0.000001898  |
| 6  | 0.000001134  | -0.000001807 | -0.000000333 |
| 1  | 0.000001422  | 0.000000498  | 0.000000812  |
| 1  | 0.000001474  | -0.000001061 | 0.000000032  |
| 1  | 0.000001918  | -0.000000404 | 0.000000087  |
| 1  | 0.000002233  | -0.000000055 | 0.000001043  |
| 1  | 0.000002137  | 0.000000683  | 0.000000252  |
| 1  | 0.000001606  | 0.000000028  | 0.000000788  |
| 1  | 0.000001417  | 0.000000396  | 0.000001173  |
| 6  | 0.000002527  | 0.000000009  | -0.000001236 |
| 6  | 0.000000031  | 0.000000162  | 0.000001064  |
| 6  | 0.000000054  | -0.000000813 | 0.000000598  |
| 1  | 0.000000382  | -0.000001204 | 0.000000937  |
| 1  | 0.000000216  | 0.000000194  | 0.000000075  |



|   |              |              |              |
|---|--------------|--------------|--------------|
| 1 | 0.000000556  | -0.000000128 | 0.000000408  |
| 1 | 0.000000396  | -0.000000488 | -0.000000118 |
| 1 | 0.000000314  | -0.000001682 | 0.000000121  |
| 1 | 0.000001533  | -0.000000741 | 0.000000589  |
| 1 | 0.000000668  | -0.000000892 | 0.000000552  |
| 6 | -0.000000483 | -0.000001907 | 0.000000387  |
| 6 | -0.000000695 | -0.000001431 | 0.000000106  |
| 6 | 0.000001164  | -0.000000972 | 0.000000891  |
| 1 | 0.000000123  | -0.00000005  | -0.000000737 |
| 1 | -0.000000558 | 0.000000264  | -0.000000646 |
| 1 | -0.000000199 | -0.000000369 | 0.000000142  |
| 1 | -0.000000039 | -0.000000112 | 0.000000029  |
| 1 | 0.000000058  | -0.000001954 | 0.000000189  |
| 1 | -0.00000001  | -0.000001361 | 0.000000409  |
| 1 | 0.000000502  | -0.000000111 | 0.000000054  |
| 6 | 0.000000827  | -0.000000899 | 0.000000622  |
| 6 | -0.000000862 | -0.000002457 | -0.000000177 |
| 6 | -0.000001616 | -0.000001745 | -0.000000512 |
| 1 | 0.000000351  | -0.000001027 | 0.000000357  |
| 1 | -0.000000124 | -0.000001721 | 0.000000025  |
| 1 | -0.000000677 | -0.000002139 | 0.000000113  |
| 1 | -0.000000633 | -0.000002078 | 0.000000204  |
| 1 | -0.000000412 | -0.000000143 | -0.000000168 |
| 1 | -0.000000676 | -0.000001445 | 0.000000581  |
| 1 | -0.000000579 | -0.000001163 | 0.000000006  |
| 6 | -0.000001293 | 0.000004047  | -0.000000686 |
| 6 | -0.000004147 | 0.000004388  | -0.000002692 |
| 6 | 0.000000421  | 0.000001933  | -0.000001612 |
| 6 | -0.000000366 | 0.000001986  | -0.000000344 |
| 6 | 0.000001149  | 0.000002749  | -0.000001105 |
| 6 | -0.000003273 | 0.000000074  | 0.000000561  |
| 6 | 0.000004227  | 0.000003253  | -0.000001927 |
| 6 | 0.000001338  | -0.000000028 | -0.000000029 |
| 1 | -0.000000044 | 0.000000229  | -0.000000177 |
| 1 | -0.000000021 | 0.000002395  | -0.000000735 |
| 1 | 0.000000644  | 0.000000192  | -0.000000505 |
| 1 | 0.000001018  | 0.000001908  | 0.000000451  |
| 1 | -0.000002089 | 0.000000005  | 0.000000812  |
| 1 | -0.000001446 | -0.000000138 | 0.000001335  |
| 7 | 0.000001469  | -0.000001597 | 0.000001773  |
| 1 | -0.000000332 | 0.000000092  | -0.000001256 |

Zero-point correction=

1.234933 (Hartree/Particle)

Thermal correction to Energy=

1.310397

Thermal correction to Enthalpy=

1.311342

|                                              |              |
|----------------------------------------------|--------------|
| Thermal correction to Gibbs Free Energy=     | 1.114830     |
| Sum of electronic and zero-point Energies=   | -3798.458343 |
| Sum of electronic and thermal Energies=      | -3798.382879 |
| Sum of electronic and thermal Enthalpies=    | -3798.381934 |
| Sum of electronic and thermal Free Energies= | -3798.578446 |

A-TSc11

|    |              |               |              |
|----|--------------|---------------|--------------|
| 6  | 0.000000686  | 0.000000606   | -0.000002289 |
| 6  | 0.000001747  | 0.000001049   | 0.000001632  |
| 7  | -0.000000852 | 0.000000765   | -0.000001837 |
| 7  | 0.000000165  | -0.000000231  | -0.000000295 |
| 16 | 0.000000234  | -0.000000316  | -0.000001591 |
| 8  | 0.000000035  | 0.000000021   | -0.000001607 |
| 8  | -0.000000003 | -0.0000000892 | -0.000001303 |
| 6  | -0.000000243 | -0.000000012  | -0.000002701 |
| 6  | -0.000000735 | 0.000000049   | -0.000002068 |
| 6  | -0.000001155 | -0.000001058  | -0.000002432 |
| 6  | -0.000002351 | 0.000000896   | -0.000000171 |
| 6  | 0.000000865  | 0.000001113   | -0.000001699 |
| 6  | 0.000000403  | -0.000000601  | -0.000000766 |
| 1  | -0.000000626 | 0.000000022   | -0.000002369 |
| 1  | -0.000000605 | 0.000000189   | -0.000003107 |
| 1  | 0.000000247  | -0.000000665  | -0.000001927 |
| 1  | 0.000000245  | -0.000000472  | -0.000001306 |
| 6  | 0.000000797  | -0.000000593  | -0.000004128 |
| 1  | -0.000000669 | -0.000001899  | -0.00000324  |
| 1  | 0.000000934  | 0.000001456   | -0.000002937 |
| 1  | 0.000000347  | -0.000000579  | -0.00000033  |
| 6  | -0.000001233 | 0.000000447   | -0.000000478 |
| 6  | -0.000001031 | 0.000001008   | -0.000000082 |
| 1  | -0.000000232 | 0.000000582   | -0.000001238 |
| 1  | -0.000000519 | 0.000000132   | -0.000000391 |
| 6  | -0.000001162 | 0.000001519   | -0.000000803 |
| 1  | -0.000000854 | 0.000000071   | -0.00000124  |
| 1  | -0.000000684 | 0.000000912   | -0.000000402 |
| 6  | -0.000001494 | 0.000001741   | -0.000000819 |
| 1  | -0.000001254 | 0.000001213   | -0.000000413 |
| 1  | -0.000001145 | 0.000001411   | -0.000001158 |
| 1  | -0.000001758 | 0.000002139   | -0.000000789 |
| 1  | -0.000001499 | 0.000001664   | -0.000001231 |
| 1  | -0.000001339 | 0.000001766   | -0.000000041 |
| 6  | -0.000000154 | 0.000000138   | -0.000001031 |
| 6  | -0.000000347 | 0.000000093   | -0.000000496 |
| 1  | 0.000000029  | 0.00000003    | -0.000000959 |

|    |              |              |              |
|----|--------------|--------------|--------------|
| 1  | 0.000000044  | -0.000000045 | -0.000000874 |
| 6  | -0.000000686 | 0.000000629  | -0.000000507 |
| 1  | -0.000000154 | 0.000000295  | -0.000000416 |
| 1  | -0.000000467 | 0.000000065  | 0.000000004  |
| 6  | -0.000000394 | 0.000001045  | -0.000000011 |
| 1  | -0.000000839 | 0.00000118   | -0.00000102  |
| 1  | -0.00000064  | 0.000000206  | -0.000000854 |
| 1  | -0.000001122 | 0.000001116  | -0.000000389 |
| 1  | -0.000000284 | 0.000000618  | -0.00000002  |
| 1  | -0.000000829 | 0.000001123  | 0.000000496  |
| 16 | 0.000000896  | -0.000000691 | -0.000000587 |
| 8  | 0.000000723  | -0.000001016 | -0.000000616 |
| 8  | 0.000000848  | -0.000001384 | -0.000000439 |
| 6  | 0.000000457  | -0.000001127 | -0.000001643 |
| 6  | 0.000000569  | -0.000000807 | -0.000001629 |
| 6  | 0.000000578  | -0.000001019 | -0.000001597 |
| 6  | 0.000000743  | -0.000000891 | -0.000001843 |
| 1  | 0.000000371  | -0.000000748 | -0.000001585 |
| 6  | 0.000000418  | -0.000001441 | -0.000002919 |
| 1  | 0.000000685  | -0.000001249 | -0.000001726 |
| 6  | -0.000000071 | -0.000001947 | -0.000003602 |
| 1  | 0.00000038   | -0.000000942 | -0.000002769 |
| 1  | 0.000000759  | -0.000001441 | -0.000002912 |
| 6  | 0.000001003  | -0.000000792 | -0.00000304  |
| 1  | 0.000001091  | -0.000001141 | -0.00000332  |
| 1  | 0.000000882  | -0.000001481 | -0.000003797 |
| 1  | -0.000000205 | -0.000001017 | -0.000003449 |
| 79 | -0.000000148 | -0.000000234 | -0.00000012  |
| 6  | 0.000000446  | -0.000000177 | 0.000000512  |
| 6  | 0.000000033  | 0.000000368  | 0.000001482  |
| 6  | 0.000000418  | 0.000000188  | 0.0000013    |
| 1  | 0.000000485  | -0.000000719 | 0.00000203   |
| 1  | -0.000000121 | 0.000000491  | 0.00000169   |
| 7  | -0.000001148 | -0.000001355 | 0.000002834  |
| 7  | 0.000001086  | 0.000000725  | 0.000001461  |
| 6  | 0.000000324  | 0.000000741  | 0.000000977  |
| 6  | -0.000000737 | 0.000000741  | -0.00000004  |
| 6  | -0.000001574 | 0.000001414  | 0.000000969  |
| 6  | -0.000000687 | 0.000000947  | 0.000000105  |
| 6  | -0.000000836 | 0.000001593  | 0.000000889  |
| 6  | -0.000001416 | 0.000001643  | 0.000000273  |
| 1  | -0.000000845 | 0.000001264  | -0.000000108 |
| 1  | -0.000001462 | 0.000001899  | 0.000000807  |
| 1  | -0.000001387 | 0.000001886  | 0.000000085  |

|   |              |              |              |
|---|--------------|--------------|--------------|
| 6 | 0.000000261  | 0.000000551  | 0.000001313  |
| 6 | 0.000001061  | -0.000000727 | 0.000001888  |
| 6 | 0.000001236  | -0.000001192 | 0.000000975  |
| 6 | 0.000000603  | -0.000001393 | 0.000002117  |
| 6 | 0.000002229  | -0.00000153  | 0.000001153  |
| 6 | 0.000001361  | -0.000001261 | 0.000001508  |
| 1 | 0.000001176  | -0.000001294 | 0.000002205  |
| 1 | 0.000001337  | -0.000001799 | 0.000000903  |
| 1 | 0.00000167   | -0.000001799 | 0.000001586  |
| 6 | 0.000000261  | -0.000000574 | 0.000002767  |
| 6 | 0.000000702  | -0.000000092 | 0.000002911  |
| 6 | 0.000000463  | -0.000000212 | 0.000002579  |
| 1 | -0.000000095 | 0.000000206  | 0.000002134  |
| 1 | 0.000001017  | -0.00000027  | 0.000003238  |
| 1 | 0.000000297  | -0.000000301 | 0.000003132  |
| 1 | 0.000000871  | -0.000000452 | 0.000002936  |
| 1 | 0.000000611  | 0.000000099  | 0.000002415  |
| 1 | 0.000000823  | -0.000000597 | 0.00000265   |
| 1 | 0.00000013   | 0.000000434  | 0.000002774  |
| 6 | 0.000000244  | -0.000001116 | 0.000000861  |
| 6 | 0.000000942  | -0.00000124  | 0.000000792  |
| 6 | 0.000000696  | -0.000001651 | 0.000000264  |
| 1 | 0.000001497  | -0.000000432 | 0.000000063  |
| 1 | 0.000000755  | -0.000001415 | -0.000000466 |
| 1 | 0.000000889  | -0.000001305 | -0.000000084 |
| 1 | 0.000001377  | -0.000001335 | -0.000000196 |
| 1 | 0.000001178  | -0.000001233 | 0.000001213  |
| 1 | 0.000001459  | -0.000001781 | 0.000000888  |
| 1 | 0.000001152  | -0.000001359 | 0.000000488  |
| 6 | -0.000000548 | 0.000001018  | 0.000001541  |
| 6 | -0.000000848 | 0.000001129  | 0.000001157  |
| 6 | -0.000001044 | 0.000001615  | 0.000002339  |
| 1 | 0.000000148  | 0.000000987  | 0.000001891  |
| 1 | -0.000000724 | 0.000001299  | 0.000001058  |
| 1 | -0.000000805 | 0.00000147   | 0.000001643  |
| 1 | -0.000000941 | 0.000001553  | 0.000001308  |
| 1 | -0.000000802 | 0.000000981  | 0.000001864  |
| 1 | -0.000000848 | 0.000002312  | 0.000001799  |
| 1 | -0.00000117  | 0.000001481  | 0.000002812  |
| 6 | -0.00000032  | 0.000000565  | 0.000000299  |
| 6 | -0.000000447 | 0.000000494  | 0.000000426  |
| 6 | -0.000000287 | 0.000000225  | -0.000000524 |
| 1 | 0.000000206  | 0.000000113  | 0.000000603  |
| 1 | -0.000000326 | 0.00000051   | 0.00000066   |

|   |              |              |              |
|---|--------------|--------------|--------------|
| 1 | -0.000000132 | 0.000000206  | 0.000000231  |
| 1 | -0.000000556 | 0.000000506  | 0.00000006   |
| 1 | -0.000000342 | 0.000000014  | -0.000000072 |
| 1 | -0.000000375 | 0.000000541  | -0.000000865 |
| 1 | -0.000000071 | -0.000000319 | -0.000000653 |
| 6 | 0.000000036  | -0.000000045 | 0.000001448  |
| 6 | -0.000000459 | -0.000000128 | 0.000001325  |
| 6 | 0.000000267  | 0.000000046  | 0.000000983  |
| 6 | 0.000000357  | 0.000000064  | 0.000001308  |
| 6 | 0.000000424  | -0.000000417 | 0.000001663  |
| 6 | 0.000000609  | -0.000000024 | 0.000000706  |
| 6 | 0.000000829  | 0.000000774  | -0.000000026 |
| 6 | -0.000002515 | -0.000004887 | 0.000001711  |
| 1 | -0.000000145 | 0.000000655  | 0.000001218  |
| 1 | -0.000000012 | 0.000000432  | 0.000001639  |
| 1 | 0.000000236  | -0.000000266 | 0.000001446  |
| 1 | 0.000000593  | -0.00000008  | 0.000000853  |
| 1 | 0.000001283  | -0.000001342 | 0.000000118  |
| 1 | 0.000000131  | 0.000000326  | 0.000001222  |
| 7 | -0.000000435 | 0.000000035  | -0.000000457 |
| 1 | 0.000000629  | -0.000000103 | 0.00000003   |

Zero-point correction=

1.231624 (Hartree/Particle)

Thermal correction to Energy=

1.307930

Thermal correction to Enthalpy=

1.308874

Thermal correction to Gibbs Free Energy=

1.106486

Sum of electronic and zero-point Energies=

-3798.434860

Sum of electronic and thermal Energies=

-3798.358553

Sum of electronic and thermal Enthalpies=

-3798.357609

Sum of electronic and thermal Free Energies=

-3798.559997

A-11c

|    |              |              |              |
|----|--------------|--------------|--------------|
| 6  | -0.000000588 | 0.000000437  | 0.000000208  |
| 6  | -0.000007139 | 0.000001356  | 0.000000093  |
| 7  | 0.000000731  | 0.000002795  | -0.000000646 |
| 7  | 0.000001591  | 0.000001947  | -0.000000543 |
| 16 | 0.000001672  | -0.000000018 | -0.000000766 |
| 8  | -0.000004756 | -0.000000816 | 0.000001447  |
| 8  | -0.000001483 | -0.000003243 | -0.000005016 |
| 6  | 0.000002053  | 0.000002147  | -0.000002503 |
| 6  | 0.000000477  | -0.000000484 | -0.000000964 |
| 6  | 0.000001867  | -0.000000262 | -0.00000223  |
| 6  | 0.000000104  | 0.000000078  | -0.000000543 |
| 6  | 0.000000846  | -0.000000251 | -0.000001608 |
| 6  | -0.000000059 | -0.000000275 | 0.000000373  |

|    |              |              |              |
|----|--------------|--------------|--------------|
| 1  | -0.00000037  | 0.000000704  | -0.000002042 |
| 1  | 0.00000036   | 0.000000037  | -0.000001842 |
| 1  | 0.000001245  | -0.000000662 | -0.000000933 |
| 1  | 0.000000667  | -0.000000526 | -0.000000904 |
| 6  | 0.000000872  | -0.000000212 | -0.00000014  |
| 1  | 0.000000756  | -0.000000216 | -0.000001886 |
| 1  | 0.000001669  | -0.000000353 | -0.000000085 |
| 1  | 0.000002041  | -0.000000812 | -0.000002029 |
| 6  | -0.000001098 | 0.000001524  | 0.000002782  |
| 6  | -0.000002128 | 0.000000951  | -0.00000173  |
| 1  | 0.000000991  | 0.000001041  | -0.000001878 |
| 1  | -0.000001722 | -0.000000811 | -0.000000503 |
| 6  | -0.00000089  | 0.000000679  | -0.000000983 |
| 1  | -0.000000813 | 0.000000206  | -0.000000661 |
| 1  | -0.000000544 | 0.000000123  | -0.000000253 |
| 6  | -0.000001696 | 0.000000929  | -0.000000324 |
| 1  | -0.000001091 | 0.000000726  | -0.000000209 |
| 1  | -0.000000761 | 0.000000921  | -0.000000904 |
| 1  | -0.000001588 | 0.000000885  | -0.000000572 |
| 1  | -0.000001542 | 0.000001066  | -0.000001084 |
| 1  | -0.000001584 | 0.000000997  | -0.000000126 |
| 6  | -0.000001349 | 0.00000062   | 0.000001155  |
| 6  | -0.000001441 | -0.000001227 | 0.000000698  |
| 1  | -0.000000527 | 0.0000015    | -0.000001553 |
| 1  | -0.000000025 | 0.000000194  | -0.000001548 |
| 6  | -0.000001276 | 0.000001355  | -0.000001241 |
| 1  | -0.000000417 | 0.000001069  | -0.000000512 |
| 1  | 0.000000003  | 0.000001125  | -0.000000038 |
| 6  | -0.000001966 | 0.000000873  | -0.000000182 |
| 1  | -0.000001635 | 0.000001295  | -0.000000744 |
| 1  | -0.000000947 | 0.00000072   | -0.000001224 |
| 1  | -0.000001905 | 0.000001312  | -0.000000512 |
| 1  | -0.00000177  | 0.000000949  | -0.000000271 |
| 1  | -0.000001526 | 0.000000962  | -0.000000073 |
| 16 | 0.000002849  | -0.000001663 | -0.000004417 |
| 8  | -0.000000611 | 0.00000195   | -0.000001221 |
| 8  | -0.000000398 | -0.000000763 | 0.000000643  |
| 6  | -0.00000111  | 0.000001209  | -0.00000145  |
| 6  | -0.000001056 | 0.000000487  | -0.000002046 |
| 6  | 0.000000735  | 0.00000058   | -0.000001198 |
| 6  | 0.000000133  | -0.000000062 | -0.000002525 |
| 1  | -0.000000127 | 0.000000347  | -0.000001316 |
| 6  | 0.000000051  | 0.000000448  | -0.000001707 |
| 1  | 0.000001582  | 0.000000036  | -0.000001313 |

|    |              |              |              |
|----|--------------|--------------|--------------|
| 6  | 0.000000617  | 0.000000951  | -0.000003092 |
| 1  | -0.000000249 | 0.000000721  | -0.000002342 |
| 1  | 0.000000731  | 0.000000113  | -0.000002536 |
| 6  | 0.000000172  | 0.000000363  | -0.000003212 |
| 1  | 0.000000494  | 0.000000307  | -0.000003186 |
| 1  | 0.000000092  | 0.000000829  | -0.000002946 |
| 1  | 0.000000085  | 0.000000089  | -0.000003272 |
| 79 | 0.000000513  | -0.000001962 | -0.000000354 |
| 6  | -0.000003673 | 0.000004843  | -0.000000266 |
| 6  | -0.000000752 | -0.000000289 | 0.000002542  |
| 6  | -0.000001225 | -0.000002404 | 0.000002092  |
| 1  | 0.000000059  | -0.000000424 | 0.000001394  |
| 1  | -0.000000032 | 0.000000273  | 0.000001374  |
| 7  | 0.000004142  | -0.000000689 | 0.000001438  |
| 7  | 0.000002224  | -0.000001472 | -0.000000246 |
| 6  | -0.000000659 | 0.000000472  | -0.000000298 |
| 6  | -0.000002226 | 0.000000432  | -0.000000107 |
| 6  | -0.000000794 | -0.000000286 | 0.000003519  |
| 6  | 0.000000342  | 0.000000313  | 0.000002225  |
| 6  | -0.000001013 | -0.000000672 | 0.000000452  |
| 6  | -0.000001035 | 0.000000074  | -0.000000392 |
| 1  | -0.000000387 | -0.000000188 | 0.000000007  |
| 1  | -0.000001105 | 0.000000774  | 0.000000993  |
| 1  | -0.000000546 | 0.000000745  | 0.000000031  |
| 6  | 0.000001417  | -0.000000178 | 0.000000995  |
| 6  | 0.000000561  | 0.000000154  | 0.000001138  |
| 6  | -0.000000395 | -0.000000946 | 0.000002787  |
| 6  | 0.000000805  | -0.000000899 | 0.000000912  |
| 6  | 0.000000971  | -0.000000156 | 0.000001123  |
| 6  | 0.000000793  | -0.000001602 | 0.000001564  |
| 1  | 0.000000643  | -0.000000771 | 0.000001572  |
| 1  | 0.000001912  | -0.000001141 | 0.000000949  |
| 1  | 0.000001203  | -0.000000794 | 0.000001133  |
| 6  | 0.00000307   | -0.000001134 | 0.000000097  |
| 6  | -0.000001501 | 0.000000061  | 0.000002757  |
| 6  | -0.000002622 | -0.000000882 | 0.000003257  |
| 1  | 0.000000824  | -0.000000063 | 0.000001297  |
| 1  | 0.000000039  | -0.000000626 | 0.000002328  |
| 1  | -0.000000604 | -0.000000471 | 0.000002578  |
| 1  | 0.000000912  | -0.000000887 | 0.000002473  |
| 1  | -0.000000105 | 0.000000082  | 0.000000845  |
| 1  | 0.000000227  | 0.000000121  | 0.000000721  |
| 1  | -0.000000612 | 0.000000168  | 0.000001433  |
| 6  | 0.00000259   | -0.000002108 | 0.000000026  |

|   |              |              |              |
|---|--------------|--------------|--------------|
| 6 | 0.000000037  | 0.000000316  | 0.000000086  |
| 6 | 0.000001156  | -0.000001398 | 0.000001165  |
| 1 | 0.000001542  | -0.000000962 | 0.000000805  |
| 1 | 0.000001389  | -0.000000558 | -0.000000715 |
| 1 | 0.000001469  | -0.000001088 | 0.000000335  |
| 1 | 0.000002158  | -0.000001317 | 0.000000192  |
| 1 | 0.000001562  | -0.000001065 | 0.000001327  |
| 1 | 0.000002047  | -0.000001023 | 0.000000706  |
| 1 | 0.000001475  | -0.000000893 | 0.000000985  |
| 6 | -0.000001348 | -0.000001112 | 0.00000141   |
| 6 | 0.000000033  | 0.000002506  | 0.00000117   |
| 6 | -0.000000246 | -0.000000257 | 0.000002546  |
| 1 | -0.000001805 | -0.00000001  | 0.000001644  |
| 1 | -0.000001196 | 0.000000154  | 0.000000144  |
| 1 | -0.000001216 | 0.000000002  | 0.000001257  |
| 1 | -0.000002405 | -0.000000563 | 0.000000834  |
| 1 | -0.000001067 | 0.000000285  | 0.000001568  |
| 1 | -0.000001886 | 0.000000938  | 0.000001296  |
| 1 | -0.000001203 | 0.000000825  | 0.000001623  |
| 6 | 0.000001175  | -0.000000898 | 0.000000484  |
| 6 | 0.000000095  | -0.000001201 | 0.000000901  |
| 6 | 0.000000075  | -0.000000316 | -0.000000168 |
| 1 | 0.000001214  | -0.000000661 | 0.000000708  |
| 1 | 0.000000165  | -0.000000681 | 0.000001343  |
| 1 | 0.000000551  | -0.000000453 | 0.000000687  |
| 1 | 0.000000843  | 0.000000278  | 0.000000748  |
| 1 | 0.000000932  | -0.000000172 | 0.000000175  |
| 1 | 0.000000298  | -0.000000362 | -0.000000275 |
| 1 | 0.000000464  | -0.000000444 | 0.000000273  |
| 6 | -0.000000009 | 0.000001325  | 0.000000107  |
| 6 | -0.000004042 | -0.000002541 | -0.000000408 |
| 6 | 0.000001468  | 0.000001115  | 0.000001443  |
| 6 | -0.000000014 | -0.000000044 | 0.000000268  |
| 6 | 0.000000346  | -0.000000083 | 0.000000019  |
| 6 | 0.000001156  | -0.000000769 | 0.000000645  |
| 6 | -0.000002445 | -0.000002863 | -0.000007312 |
| 6 | 0.000002439  | -0.000004367 | 0.00000926   |
| 1 | -0.000001072 | 0.000000015  | 0.000000657  |
| 1 | -0.000000095 | -0.000000248 | 0.000000682  |
| 1 | 0.000000757  | -0.000000648 | 0.000000632  |
| 1 | 0.000000906  | -0.000000388 | 0.000000396  |
| 1 | 0.000000795  | -0.000000033 | -0.000000037 |
| 1 | 0.000000388  | -0.000000355 | -0.000000272 |
| 7 | 0.000010779  | 0.00000411   | -0.000002034 |



|                                              |              |           |                             |
|----------------------------------------------|--------------|-----------|-----------------------------|
| 1                                            | -0.000006847 | 0.0000006 | 0.000000461                 |
| Zero-point correction=                       |              |           | 1.234051 (Hartree/Particle) |
| Thermal correction to Energy=                |              |           | 1.309936                    |
| Thermal correction to Enthalpy=              |              |           | 1.310880                    |
| Thermal correction to Gibbs Free Energy=     |              |           | 1.111430                    |
| Sum of electronic and zero-point Energies=   |              |           | -3798.463959                |
| Sum of electronic and thermal Energies=      |              |           | -3798.388074                |
| Sum of electronic and thermal Enthalpies=    |              |           | -3798.387130                |
| Sum of electronic and thermal Free Energies= |              |           | -3798.586579                |

A-TSc1

|    |              |              |              |
|----|--------------|--------------|--------------|
| 6  | 0.000000747  | -0.000000124 | -0.000000008 |
| 6  | -0.000002003 | -0.000000779 | 0.000000941  |
| 7  | 0.000000942  | 0.000000039  | -0.000000345 |
| 7  | -0.000000229 | 0.000001129  | -0.000001085 |
| 16 | 0.000001715  | 0.000000681  | -0.000000327 |
| 8  | 0.000001298  | 0.000001611  | 0.000000729  |
| 8  | 0.000000889  | 0.000000905  | 0.000000108  |
| 6  | 0.000001733  | 0.000000453  | 0.000000736  |
| 6  | 0.000002256  | 0.000000269  | 0.000000656  |
| 6  | 0.000002977  | 0.000000416  | 0.000000529  |
| 6  | 0.000002473  | -0.000000595 | 0.000000363  |
| 6  | 0.000001981  | -0.000000311 | 0.000000555  |
| 6  | 0.000002037  | 0.000000028  | 0.000000298  |
| 1  | 0.000002417  | 0.000000072  | 0.000000758  |
| 1  | 0.000003087  | 0.000000106  | 0.000000812  |
| 1  | 0.00000203   | -0.000000482 | 0.000000558  |
| 1  | 0.000001291  | 0.000000116  | 0.000000436  |
| 6  | 0.00000315   | -0.000000438 | 0.000000834  |
| 1  | 0.000003657  | -0.000000058 | 0.000000866  |
| 1  | 0.000002897  | -0.000000905 | 0.000001019  |
| 1  | 0.000002489  | -0.000000795 | 0.000001023  |
| 6  | 0.000000753  | 0.000000172  | 0.000000724  |
| 6  | 0.000001029  | 0.000000116  | 0.000000297  |
| 1  | 0.000001492  | 0.000000379  | 0.000000366  |
| 1  | 0.000001379  | -0.000000248 | 0.000000203  |
| 6  | 0.000001002  | -0.000000376 | 0.000000375  |
| 1  | 0.000000828  | 0.000000458  | 0.000000305  |
| 1  | 0.000000475  | 0.000000006  | 0.000000096  |
| 6  | 0.000000876  | -0.000000352 | 0.000000151  |
| 1  | 0.000001092  | -0.000000742 | 0.000000037  |
| 1  | 0.000001564  | -0.000000194 | 0.000000394  |
| 1  | 0.00000104   | -0.000000702 | 0.000000319  |
| 1  | 0.000000083  | -0.000000015 | 0.000000287  |

|    |              |              |              |
|----|--------------|--------------|--------------|
| 1  | 0.000000395  | -0.00000053  | 0.00000012   |
| 6  | -0.000000945 | 0.000000863  | 0.000000395  |
| 6  | -0.000001075 | 0.000001408  | -0.00000025  |
| 1  | -0.000000784 | 0.000000627  | -0.000000306 |
| 1  | -0.000000264 | 0.000001257  | -0.000000173 |
| 6  | -0.000001295 | 0.000001642  | -0.000000432 |
| 1  | -0.00000146  | 0.000001308  | -0.000000532 |
| 1  | -0.000001242 | 0.000001878  | -0.000000114 |
| 6  | -0.000001795 | 0.000001939  | -0.000000497 |
| 1  | -0.000000808 | 0.000001817  | -0.000000329 |
| 1  | -0.000001327 | 0.000001196  | -0.000000344 |
| 1  | -0.000001829 | 0.000002127  | -0.000000542 |
| 1  | -0.000002085 | 0.000001839  | -0.000000653 |
| 1  | -0.000001672 | 0.00000023   | -0.000000586 |
| 16 | -0.000000351 | 0.000000695  | -0.000000859 |
| 8  | -0.000000536 | -0.000000493 | 0.000000004  |
| 8  | -0.000001449 | 0.000000143  | -0.000000477 |
| 6  | -0.00000158  | 0.00000124   | 0.000000316  |
| 6  | -0.000000757 | 0.000000997  | -0.000000796 |
| 6  | -0.000001655 | 0.00000116   | -0.000000698 |
| 6  | -0.000001341 | 0.000001227  | -0.000000233 |
| 1  | -0.000000615 | 0.000000688  | -0.00000006  |
| 6  | -0.000001721 | 0.000001567  | -0.000000885 |
| 1  | -0.00000188  | 0.000001609  | -0.000000366 |
| 6  | -0.000001362 | 0.000001762  | -0.000000283 |
| 1  | -0.000000902 | 0.000001206  | -0.000000227 |
| 1  | -0.000002081 | 0.000001731  | -0.00000053  |
| 6  | -0.000001621 | 0.000001381  | -0.000000343 |
| 1  | -0.00000166  | 0.000002144  | -0.000000509 |
| 1  | -0.000002301 | 0.000002302  | -0.000000765 |
| 1  | -0.000002195 | 0.000001755  | -0.000000926 |
| 79 | 0.000000496  | 0.000000272  | -0.000000013 |
| 6  | -0.000000528 | -0.000001041 | -0.000000186 |
| 6  | 0.000000001  | -0.000001916 | -0.000000007 |
| 6  | -0.000000214 | -0.000001519 | -0.000000011 |
| 1  | -0.000000455 | -0.000001762 | -0.000000076 |
| 1  | -0.000000017 | -0.000002337 | 0.000000101  |
| 7  | 0.000000094  | -0.000001491 | 0.000000101  |
| 7  | -0.000000285 | -0.000001435 | 0.000000124  |
| 6  | 0.000000463  | -0.000001907 | 0.000000276  |
| 6  | 0.000000772  | -0.000001617 | 0.000000073  |
| 6  | -0.000000067 | -0.000001635 | 0.000000269  |
| 6  | 0.00000106   | -0.000001841 | 0.000000515  |
| 6  | 0.000000227  | -0.000001953 | 0.000000006  |

|   |              |              |              |
|---|--------------|--------------|--------------|
| 6 | 0.000000711  | -0.000002108 | 0.000000311  |
| 1 | 0.000001477  | -0.00000019  | 0.000000448  |
| 1 | 0.000000007  | -0.000001894 | 0.000000036  |
| 1 | 0.000000907  | -0.000002064 | 0.000000312  |
| 6 | -0.000000773 | -0.000000141 | -0.000000062 |
| 6 | -0.000001205 | -0.000000663 | -0.000000261 |
| 6 | -0.000000091 | -0.000000437 | -0.000000021 |
| 6 | -0.000000145 | -0.000000151 | -0.000000355 |
| 6 | 0.000000009  | -0.000000136 | -0.000000293 |
| 6 | -0.000000927 | 0.000000229  | -0.000000031 |
| 1 | -0.000001686 | -0.000000161 | -0.000000478 |
| 1 | -0.000000215 | 0.000000017  | -0.000000001 |
| 1 | -0.000001122 | 0.000000429  | -0.000000274 |
| 6 | -0.000001352 | -0.000000943 | -0.000000282 |
| 6 | -0.000001644 | -0.000001435 | -0.000000399 |
| 6 | -0.000001754 | -0.000000754 | -0.000000567 |
| 1 | -0.000001225 | -0.000001154 | -0.000000215 |
| 1 | -0.000001431 | -0.000001636 | -0.000000346 |
| 1 | -0.000001978 | -0.000001617 | -0.000000467 |
| 1 | -0.000001911 | -0.000001193 | -0.000000462 |
| 1 | -0.000001706 | 0.000000004  | -0.000000267 |
| 1 | -0.000002083 | -0.000000419 | -0.000000524 |
| 1 | -0.000001981 | -0.000000856 | -0.000000494 |
| 6 | 0.000000094  | -0.000000505 | 0.000000149  |
| 6 | 0.000000546  | 0.000000007  | 0.000000324  |
| 6 | 0.000000344  | -0.000000854 | 0.000000006  |
| 1 | 0.000000541  | -0.000000085 | 0.000000171  |
| 1 | 0.000000899  | 0.000000635  | 0.000000235  |
| 1 | 0.000001205  | 0.000000102  | 0.000000246  |
| 1 | 0.000000749  | 0.000000013  | 0.000000177  |
| 1 | 0.000000323  | -0.000001376 | 0.000000073  |
| 1 | 0.000000422  | -0.000000066 | 0.000000198  |
| 1 | 0.000000979  | -0.000000999 | 0.000000329  |
| 6 | -0.00000055  | -0.000001476 | -0.000000143 |
| 6 | -0.00000058  | -0.000001537 | -0.000000292 |
| 6 | -0.00000009  | -0.000002232 | -0.000000137 |
| 1 | -0.000000778 | -0.000001555 | -0.000000021 |
| 1 | -0.000000758 | -0.000000726 | -0.000000224 |
| 1 | -0.000001264 | -0.000001225 | -0.000000305 |
| 1 | -0.000000928 | -0.00000144  | -0.000000113 |
| 1 | -0.000000788 | -0.00000242  | -0.000000082 |
| 1 | -0.000000848 | -0.000002442 | -0.000000146 |
| 1 | -0.000001293 | -0.000002147 | -0.000000298 |
| 6 | 0.000001467  | -0.000001656 | 0.000000383  |

|   |              |              |              |
|---|--------------|--------------|--------------|
| 6 | 0.000001276  | -0.000002342 | 0.000000422  |
| 6 | 0.000001772  | -0.000001342 | 0.000000575  |
| 1 | 0.00000103   | -0.000001555 | 0.000000221  |
| 1 | 0.000000961  | -0.000002577 | 0.000000367  |
| 1 | 0.000001552  | -0.00000023  | 0.000000511  |
| 1 | 0.000001586  | -0.000002549 | 0.000000538  |
| 1 | 0.000001736  | -0.000001161 | 0.000000494  |
| 1 | 0.000002052  | -0.00000161  | 0.000000725  |
| 1 | 0.000001924  | -0.000001497 | 0.000000557  |
| 6 | -0.00000038  | 0.000001894  | -0.000000132 |
| 6 | -0.000000411 | 0.000001703  | -0.000000444 |
| 6 | -0.000000593 | 0.00000025   | -0.000000441 |
| 6 | -0.000001033 | 0.000002915  | -0.000000308 |
| 6 | -0.00000053  | 0.000003056  | -0.000000377 |
| 6 | -0.00000015  | 0.000002668  | 0.00000004   |
| 6 | 0.000000958  | 0.000002281  | -0.000000177 |
| 6 | 0.000000276  | 0.000001734  | 0.000000123  |
| 1 | -0.000000802 | 0.000002294  | -0.000000182 |
| 1 | -0.000001275 | 0.000003165  | -0.000000439 |
| 1 | -0.000000761 | 0.000003248  | -0.000000324 |
| 1 | -0.000000072 | 0.000002669  | -0.000000034 |
| 1 | 0.000000414  | 0.000001723  | -0.000000177 |
| 1 | 0.000000443  | 0.00000019   | 0.000000167  |
| 7 | 0.000001373  | 0.000002781  | -0.000000652 |
| 1 | -0.000000354 | 0.000000606  | 0.000000075  |

|                                              |                             |
|----------------------------------------------|-----------------------------|
| Zero-point correction=                       | 1.232654 (Hartree/Particle) |
| Thermal correction to Energy=                | 1.308742                    |
| Thermal correction to Enthalpy=              | 1.309687                    |
| Thermal correction to Gibbs Free Energy=     | 1.109458                    |
| Sum of electronic and zero-point Energies=   | -3798.448894                |
| Sum of electronic and thermal Energies=      | -3798.372805                |
| Sum of electronic and thermal Enthalpies=    | -3798.371861                |
| Sum of electronic and thermal Free Energies= | -3798.572090                |

#### A-1c

|    |              |              |              |
|----|--------------|--------------|--------------|
| 6  | -0.000000762 | 0.00000097   | -0.000000791 |
| 6  | 0.000002365  | -0.00000474  | 0.000002184  |
| 7  | -0.000000411 | 0.000000889  | -0.000000976 |
| 7  | -0.000001828 | 0.000004012  | 0.000003246  |
| 16 | 0.000000636  | -0.000000532 | 0.000002313  |
| 8  | 0.000001113  | 0.000000313  | 0.00000139   |
| 8  | 0.000000349  | -0.000001078 | 0.000002309  |
| 6  | 0.000001087  | 0.000001152  | 0.000000112  |
| 6  | -0.000000286 | -0.000001397 | 0.000002502  |

|    |              |              |              |
|----|--------------|--------------|--------------|
| 6  | 0.000001074  | -0.000001546 | 0.000005227  |
| 6  | 0.000003215  | 0.000002403  | -0.000003016 |
| 6  | 0.000000333  | -0.000003255 | 0.000001498  |
| 6  | 0.000001382  | -0.000001207 | 0.000002712  |
| 1  | 0.000001719  | -0.000000308 | 0.000001978  |
| 1  | 0.000001686  | -0.000002339 | 0.000001204  |
| 1  | 0.000000318  | -0.000002996 | 0.000000553  |
| 1  | 0.000000017  | -0.000001433 | 0.000000703  |
| 6  | 0.000001128  | -0.000005851 | -0.000003179 |
| 1  | 0.000000574  | -0.000001824 | 0.000003526  |
| 1  | 0.000000079  | -0.000002047 | 0.00000042   |
| 1  | 0.000000903  | -0.000000817 | 0.000004318  |
| 6  | 0.000001501  | -0.000000637 | 0.00000124   |
| 6  | -0.000000218 | 0.000001713  | 0.000000976  |
| 1  | 0.000001081  | -0.000000173 | 0.000000669  |
| 1  | 0.000000582  | 0.000000861  | 0.00000107   |
| 6  | 0.000001576  | 0.000000495  | 0.000000814  |
| 1  | 0.000001067  | 0.000000921  | 0.000001396  |
| 1  | 0.000000578  | 0.000000657  | 0.000000866  |
| 6  | 0.000000969  | 0.000002149  | 0.000001196  |
| 1  | 0.000000362  | 0.000001262  | 0.000000924  |
| 1  | 0.00000143   | 0.000001167  | 0.000001217  |
| 1  | 0.000001165  | 0.000001648  | 0.000001055  |
| 1  | 0.000001342  | 0.000001735  | 0.000001281  |
| 1  | 0.000000742  | 0.000001788  | 0.000000549  |
| 6  | 0.000000131  | -0.000000338 | -0.000000361 |
| 6  | -0.000000436 | 0.000000001  | -0.000000047 |
| 1  | -0.000000152 | 0.000000245  | -0.000000045 |
| 1  | -0.000000379 | 0.000000007  | -0.000000277 |
| 6  | -0.000000216 | -0.000000061 | -0.000000401 |
| 1  | 0.000000361  | 0.000000238  | 0.000000185  |
| 1  | 0.000000165  | -0.000000226 | 0.000000229  |
| 6  | -0.000000042 | -0.000000074 | -0.000000035 |
| 1  | -0.000000407 | -0.000000897 | -0.000000296 |
| 1  | -0.000000048 | -0.000000049 | -0.00000005  |
| 1  | -0.000000286 | -0.000001153 | -0.000000124 |
| 1  | -0.000000014 | -0.000000591 | 0.000000079  |
| 1  | 0.000000073  | -0.000001014 | 0.000000336  |
| 16 | 0.000000636  | -0.000000373 | -0.000001811 |
| 8  | 0.000000016  | 0.000000505  | -0.000000781 |
| 8  | -0.000000919 | 0.000000101  | -0.000001296 |
| 6  | -0.000000774 | 0.000002946  | -0.000000281 |
| 6  | -0.000001309 | 0.000000457  | -0.00000164  |
| 6  | 0.000000765  | 0.000001735  | -0.000000685 |

|    |              |              |              |
|----|--------------|--------------|--------------|
| 6  | 0.000001007  | 0.000000735  | -0.000000067 |
| 1  | -0.000000534 | 0.000001196  | -0.000001195 |
| 6  | -0.000001227 | 0.000000978  | -0.000003423 |
| 1  | 0.00000012   | 0.000001237  | -0.000000276 |
| 6  | -0.000001546 | 0.00000445   | -0.000000125 |
| 1  | -0.000000873 | 0.000001693  | -0.00000159  |
| 1  | -0.000000049 | 0.000001545  | -0.000000511 |
| 6  | -0.000001089 | 0.000002976  | 0.000000065  |
| 1  | -0.00000171  | 0.000002864  | -0.000003522 |
| 1  | -0.000000191 | 0.000002403  | -0.000000233 |
| 1  | -0.000000159 | -0.000000214 | -0.000002971 |
| 79 | 0.000000392  | -0.000000622 | 0.000000655  |
| 6  | 0.00000008   | -0.000000487 | -0.000000868 |
| 6  | -0.000002466 | -0.000002378 | -0.00000205  |
| 6  | 0.000000885  | 0.00000063   | 0.00000077   |
| 1  | -0.000000852 | -0.000000799 | -0.000000933 |
| 1  | -0.000000741 | -0.000000798 | -0.00000098  |
| 7  | 0.000000286  | 0.000000593  | -0.000000091 |
| 7  | -0.000000541 | -0.000001555 | -0.0000012   |
| 6  | 0.000000754  | -0.000000112 | 0.000000164  |
| 6  | -0.000000748 | 0.0000003    | 0.000000993  |
| 6  | 0.000000455  | 0.000000202  | -0.000000118 |
| 6  | 0.000000447  | -0.000000241 | 0.000000516  |
| 6  | 0.000000397  | 0.00000139   | -0.00000045  |
| 6  | 0.000000493  | -0.000000002 | 0.000000018  |
| 1  | 0.000000489  | -0.000000437 | 0.000000665  |
| 1  | 0.000000237  | 0.000001315  | -0.000000038 |
| 1  | 0.00000041   | 0.000000708  | 0.000000504  |
| 6  | 0.000000001  | 0.000000842  | -0.000000512 |
| 6  | -0.000001891 | -0.000002247 | -0.000000816 |
| 6  | -0.000000582 | -0.000000591 | -0.000001762 |
| 6  | -0.000001394 | -0.000000885 | -0.000001087 |
| 6  | -0.000000488 | -0.000002135 | -0.000000788 |
| 6  | -0.000001037 | -0.000001269 | -0.000001376 |
| 1  | -0.000001624 | -0.000000879 | -0.000001672 |
| 1  | -0.000000829 | -0.000001793 | -0.000000623 |
| 1  | -0.000001269 | -0.000001531 | -0.000001267 |
| 6  | -0.000001201 | 0.000000188  | -0.000002127 |
| 6  | -0.000001569 | -0.000000674 | -0.000001849 |
| 6  | -0.000000754 | 0.000000138  | -0.000001173 |
| 1  | -0.000001779 | -0.000000557 | -0.00000117  |
| 1  | -0.00000175  | -0.00000075  | -0.000001841 |
| 1  | -0.00000168  | -0.000000078 | -0.00000208  |
| 1  | -0.000001722 | -0.000000548 | -0.000002056 |

|   |              |              |              |
|---|--------------|--------------|--------------|
| 1 | -0.00000098  | 0.000000525  | -0.000001514 |
| 1 | -0.000001452 | 0.000000146  | -0.000001671 |
| 1 | -0.000001237 | 0.000000703  | -0.000001823 |
| 6 | -0.000000477 | -0.000002198 | -0.000000538 |
| 6 | -0.000000604 | -0.000001346 | 0.00000055   |
| 6 | -0.000000792 | -0.000002192 | -0.000000306 |
| 1 | -0.000000354 | -0.000001286 | -0.000000163 |
| 1 | -0.000000209 | -0.000001878 | 0.000000222  |
| 1 | 0.000000208  | -0.00000227  | 0.000000122  |
| 1 | -0.000000403 | -0.000002135 | 0.000000021  |
| 1 | -0.000000812 | -0.00000235  | -0.000001017 |
| 1 | -0.000000789 | -0.000002404 | -0.000000594 |
| 1 | -0.000000534 | -0.000002315 | -0.000000121 |
| 6 | -0.000000296 | 0.000000566  | -0.000000544 |
| 6 | -0.000000644 | 0.000001182  | -0.000000719 |
| 6 | -0.000000726 | 0.00000071   | -0.000001251 |
| 1 | -0.000000448 | 0.000000433  | -0.00000071  |
| 1 | 0.000000013  | 0.000001748  | -0.00000013  |
| 1 | -0.000000564 | 0.000001122  | -0.000001103 |
| 1 | -0.000000517 | 0.00000136   | -0.000000253 |
| 1 | -0.000000885 | 0.000000431  | -0.000001082 |
| 1 | -0.000000605 | 0.000001203  | -0.000000844 |
| 1 | -0.000000833 | 0.000000962  | -0.000001334 |
| 6 | 0.00000049   | -0.000000969 | -0.000000361 |
| 6 | 0.000000037  | -0.000001416 | 0.000000325  |
| 6 | 0.000000578  | -0.000000835 | 0.000001234  |
| 1 | -0.00000005  | -0.000001385 | 0.0000001    |
| 1 | -0.000000387 | -0.000001422 | -0.000000093 |
| 1 | -0.000000089 | -0.000001681 | 0.000000307  |
| 1 | 0.000000231  | -0.000001125 | 0.000000543  |
| 1 | 0.000000472  | -0.00000081  | 0.000000978  |
| 1 | 0.000000377  | -0.000001026 | 0.000001273  |
| 1 | 0.000000015  | -0.000001291 | 0.000000754  |
| 6 | 0.000000199  | 0.000000579  | 0.000001325  |
| 6 | 0.000000818  | 0.000000837  | 0.00000135   |
| 6 | 0.000001034  | 0.00000195   | 0.000000477  |
| 6 | 0.000000958  | 0.000002087  | 0.000000768  |
| 6 | 0.000000969  | 0.000001529  | 0.000000973  |
| 6 | 0.000000948  | 0.000000626  | 0.00000125   |
| 6 | 0.000001469  | -0.000000738 | 0.000001766  |
| 6 | -0.000000566 | 0.000007464  | -0.000002951 |
| 1 | 0.000000764  | 0.000002326  | 0.000000532  |
| 1 | 0.000000965  | 0.000002355  | 0.000000699  |
| 1 | 0.000001105  | 0.000001652  | 0.000001036  |

|                                              |             |              |                             |
|----------------------------------------------|-------------|--------------|-----------------------------|
| 1                                            | 0.000000985 | 0.00000077   | 0.000001146                 |
| 1                                            | 0.000000944 | 0.000000443  | 0.000001213                 |
| 1                                            | 0.00000167  | -0.000001334 | 0.000001119                 |
| 7                                            | 0.000001858 | 0.000003241  | 0.000000527                 |
| 1                                            | 0.00000062  | 0.000000906  | -0.000000109                |
| Zero-point correction=                       |             |              | 1.234888 (Hartree/Particle) |
| Thermal correction to Energy=                |             |              | 1.310503                    |
| Thermal correction to Enthalpy=              |             |              | 1.311447                    |
| Thermal correction to Gibbs Free Energy=     |             |              | 1.113363                    |
| Sum of electronic and zero-point Energies=   |             |              | -3798.477961                |
| Sum of electronic and thermal Energies=      |             |              | -3798.402345                |
| Sum of electronic and thermal Enthalpies=    |             |              | -3798.401401                |
| Sum of electronic and thermal Free Energies= |             |              | -3798.599485                |

#### A-TSd11

|    |              |              |               |
|----|--------------|--------------|---------------|
| 6  | -0.000000325 | 0.000000621  | -0.000000833  |
| 6  | -0.000000261 | 0.000000476  | 0.000001833   |
| 7  | 0.000001685  | -0.000000435 | 0.000000051   |
| 7  | -0.000000132 | 0.000000657  | 0.000000179   |
| 16 | 0.000000144  | -0.000000036 | -0.000000732  |
| 8  | 0.000000617  | 0.000000312  | -0.000000399  |
| 8  | 0.000001396  | 0.000000426  | -0.000000261  |
| 6  | 0.000000963  | 0.000000255  | -0.000001678  |
| 6  | 0.000000555  | -0.000001315 | -0.000001869  |
| 6  | 0.000000805  | -0.000001554 | -0.000001515  |
| 6  | 0.000001239  | 0.000000312  | -0.0000005122 |
| 6  | 0.000000988  | -0.000000075 | -0.000001534  |
| 6  | 0.000002013  | -0.000000103 | -0.000000639  |
| 1  | 0.000000702  | -0.000000036 | -0.000001284  |
| 1  | 0.000000967  | -0.000000077 | -0.000001787  |
| 1  | 0.000001429  | -0.000000128 | -0.000000963  |
| 1  | 0.000001378  | 0.000000088  | -0.000000966  |
| 6  | 0.000000372  | -0.000000753 | -0.000000774  |
| 1  | 0.000001172  | -0.000001728 | -0.000002237  |
| 1  | 0.00000038   | 0.000000067  | -0.000001801  |
| 1  | 0.000002121  | -0.0000001   | -0.000002416  |
| 6  | -0.000000388 | -0.000000539 | -0.000000541  |
| 6  | -0.000000778 | -0.000000521 | -0.000000029  |
| 1  | 0.000000015  | -0.000000524 | -0.000000057  |
| 1  | -0.000000037 | -0.000001129 | -0.000000069  |
| 6  | -0.000000919 | -0.000001182 | -0.000000644  |
| 1  | -0.000000557 | -0.000000448 | -0.000000105  |
| 1  | -0.000000755 | -0.000000629 | -0.000000002  |
| 6  | -0.000001442 | -0.000001316 | -0.000000423  |



|    |              |              |              |
|----|--------------|--------------|--------------|
| 1  | -0.00000815  | -0.000001216 | -0.000000762 |
| 1  | -0.00000823  | -0.000001125 | -0.000000867 |
| 1  | -0.000001676 | -0.00000152  | -0.000000546 |
| 1  | -0.000001469 | -0.000001101 | -0.000000156 |
| 1  | -0.000001592 | -0.000001115 | -0.000000129 |
| 6  | -0.000000337 | 0.000000397  | 0.000000905  |
| 6  | -0.000000869 | 0.000000396  | 0.000001582  |
| 1  | -0.000000535 | 0.000000095  | 0.000000483  |
| 1  | -0.00000064  | -0.000000014 | 0.000000962  |
| 6  | -0.000001459 | 0.000000263  | 0.000001305  |
| 1  | -0.000000777 | 0.000000474  | 0.000001748  |
| 1  | -0.000000058 | 0.000000131  | 0.000001123  |
| 6  | -0.000001692 | 0.000000165  | 0.000001876  |
| 1  | -0.000001567 | -0.000000065 | 0.00000012   |
| 1  | -0.000001364 | 0.000000176  | 0.000001386  |
| 1  | -0.000001988 | 0.000000038  | 0.000001998  |
| 1  | -0.000001568 | 0.000000582  | 0.000002139  |
| 1  | -0.000001803 | 0.000000361  | 0.00000202   |
| 16 | 0.000000075  | 0.000000867  | 0.000000594  |
| 8  | 0.000000046  | 0.00000012   | 0.000000222  |
| 8  | -0.000000349 | 0.000000589  | 0.000001232  |
| 6  | 0.000000836  | 0.000000908  | 0.000001013  |
| 6  | 0.000002399  | 0.000000446  | 0.000001847  |
| 6  | 0.000000741  | 0.000000617  | 0.000001442  |
| 6  | 0.000001859  | 0.000000855  | 0.000000764  |
| 1  | 0.000001053  | 0.000001202  | 0.000000236  |
| 6  | 0.000001581  | 0.000001503  | 0.000002299  |
| 1  | 0.000000021  | 0.000001665  | 0.000001556  |
| 6  | -0.000000888 | 0.000003749  | 0.000000748  |
| 1  | 0.000001317  | 0.000002233  | 0.000000552  |
| 1  | 0.000000474  | 0.000002717  | 0.000001879  |
| 6  | 0.000000323  | 0.000004316  | 0.000001304  |
| 1  | 0.000002568  | 0.000000993  | 0.000001534  |
| 1  | 0.000002351  | 0.000001619  | 0.000002056  |
| 1  | 0.000002932  | 0.00000124   | 0.000001572  |
| 79 | -0.000000044 | -0.000000486 | -0.000000246 |
| 6  | 0.000000016  | 0.000001747  | -0.000000612 |
| 6  | -0.000000035 | -0.000000173 | -0.000000696 |
| 6  | 0.000000355  | -0.000000289 | -0.000000673 |
| 1  | 0.000000269  | -0.000000366 | -0.00000049  |
| 1  | -0.00000031  | -0.000001013 | -0.000001117 |
| 7  | -0.000000529 | -0.000002163 | -0.00000011  |
| 7  | -0.000000122 | -0.00000181  | -0.000000794 |
| 6  | -0.000000174 | -0.000000735 | -0.000000479 |

|   |              |              |              |
|---|--------------|--------------|--------------|
| 6 | -0.000000919 | -0.000000929 | -0.000001196 |
| 6 | -0.000000795 | -0.000001573 | -0.000000977 |
| 6 | -0.000000615 | -0.000001294 | -0.000001727 |
| 6 | -0.000001066 | -0.000001443 | -0.000000783 |
| 6 | -0.000001253 | -0.000001829 | -0.000001415 |
| 1 | -0.00000051  | -0.000001569 | -0.000001922 |
| 1 | -0.000001594 | -0.000001414 | -0.000000472 |
| 1 | -0.000001295 | -0.000001856 | -0.000001343 |
| 6 | 0.00000057   | 0.000000764  | 0.000000113  |
| 6 | 0.00000027   | 0.000000344  | 0.000000702  |
| 6 | 0.000000795  | 0.000000982  | -0.000000102 |
| 6 | 0.000000494  | 0.000000904  | 0.000000702  |
| 6 | 0.000001005  | 0.000000604  | 0.000000383  |
| 6 | 0.000000954  | 0.000000875  | 0.000000465  |
| 1 | 0.000000255  | 0.000001013  | 0.000001058  |
| 1 | 0.000001433  | 0.000001074  | 0.000000169  |
| 1 | 0.000001166  | 0.000001349  | 0.000000854  |
| 6 | -0.000000348 | 0.000000074  | 0.000000664  |
| 6 | -0.00000045  | 0.000000288  | 0.000000567  |
| 6 | -0.000000595 | 0.000000012  | 0.000001095  |
| 1 | -0.000000515 | 0.000000022  | 0.000000013  |
| 1 | -0.000000056 | 0.000000088  | 0.000000216  |
| 1 | -0.000000688 | -0.000000024 | 0.000000667  |
| 1 | -0.000000118 | 0.000000489  | 0.000000847  |
| 1 | -0.000000457 | 0.000000155  | 0.000001003  |
| 1 | -0.000000401 | 0.000000629  | 0.000001282  |
| 1 | -0.000001028 | 0.000000174  | 0.000000982  |
| 6 | 0.000001114  | 0.000000568  | -0.000000037 |
| 6 | 0.000001478  | 0.000000636  | -0.000000634 |
| 6 | 0.00000149   | 0.000000328  | -0.000000683 |
| 1 | 0.00000103   | 0.000000061  | -0.000000833 |
| 1 | 0.00000138   | 0.000000739  | -0.000000113 |
| 1 | 0.000001835  | 0.000000453  | -0.000001036 |
| 1 | 0.000001912  | 0.000000083  | -0.000000547 |
| 1 | 0.00000106   | 0.000000031  | -0.000000986 |
| 1 | 0.000001725  | 0.000000487  | -0.000000775 |
| 1 | 0.000001555  | 0.000000198  | -0.000001302 |
| 6 | -0.000000595 | -0.00000045  | -0.000000212 |
| 6 | -0.000001909 | -0.000001072 | 0.00000001   |
| 6 | -0.000001384 | -0.000001097 | -0.000000447 |
| 1 | -0.000000932 | -0.000000475 | 0.000000343  |
| 1 | -0.000001628 | -0.000000836 | 0.00000002   |
| 1 | -0.000001534 | -0.000000833 | 0.000000401  |
| 1 | -0.000001894 | -0.000001068 | 0.000000011  |

|   |              |              |              |
|---|--------------|--------------|--------------|
| 1 | -0.00000111  | -0.000000937 | -0.000000467 |
| 1 | -0.000001757 | -0.00000136  | -0.000000292 |
| 1 | -0.000001554 | -0.000000954 | 0.000000203  |
| 6 | 0.000000344  | -0.000000923 | -0.000001527 |
| 6 | 0.000000153  | -0.000001184 | -0.000001985 |
| 6 | 0.000000769  | -0.000001156 | -0.000002195 |
| 1 | 0.000000575  | -0.000000411 | -0.000001413 |
| 1 | 0.000000057  | -0.000001514 | -0.000001964 |
| 1 | 0.000000508  | -0.000001276 | -0.000002128 |
| 1 | 0.000000313  | -0.000001691 | -0.000002241 |
| 1 | -0.000000168 | -0.00000051  | -0.000001875 |
| 1 | 0.000000371  | -0.000001292 | -0.000001932 |
| 1 | 0.000001235  | -0.000001343 | -0.000002341 |
| 6 | -0.000000712 | 0.000000594  | 0.000001356  |
| 6 | -0.000000314 | 0.000000442  | 0.000000901  |
| 6 | -0.000001029 | -0.000000048 | 0.000001166  |
| 6 | -0.000001462 | 0.000000172  | 0.000001493  |
| 6 | -0.000001109 | 0.000000532  | 0.000001845  |
| 6 | -0.00000089  | 0.000000383  | 0.000001686  |
| 6 | -0.000000544 | 0.000000639  | 0.000001712  |
| 6 | 0.000000331  | 0.000001642  | 0.000001201  |
| 1 | -0.000001803 | -0.000000092 | 0.000000274  |
| 1 | -0.000001793 | -0.000000197 | 0.000001321  |
| 1 | -0.000001718 | 0.000000364  | 0.000002118  |
| 1 | -0.000001068 | 0.000000963  | 0.000002285  |
| 1 | -0.000000081 | 0.00000135   | 0.000001936  |
| 1 | 0.000000618  | 0.000001385  | 0.000001314  |
| 7 | -0.000000017 | 0.000000252  | 0.000000351  |
| 1 | 0.000000196  | 0.000000602  | 0.000000779  |

Zero-point correction=

1.233127 (Hartree/Particle)

Thermal correction to Energy=

1.308678

Thermal correction to Enthalpy=

1.309622

Thermal correction to Gibbs Free Energy=

1.112747

Sum of electronic and zero-point Energies=

-3798.422401

Sum of electronic and thermal Energies=

-3798.346850

Sum of electronic and thermal Enthalpies=

-3798.345906

Sum of electronic and thermal Free Energies=

-3798.542781

A-11d

|    |              |              |              |
|----|--------------|--------------|--------------|
| 6  | 0.000001874  | 0.000010125  | -0.000005885 |
| 6  | 0.000005481  | -0.000010708 | 0.000002495  |
| 7  | -0.000005966 | -0.000014895 | -0.000005116 |
| 7  | -0.000002155 | 0.000011289  | 0.000002405  |
| 16 | 0.00000553   | 0.000011144  | 0.000003691  |

|    |              |              |              |
|----|--------------|--------------|--------------|
| 8  | -0.000001601 | -0.000003957 | 0.000001231  |
| 8  | -0.000000841 | 0.000001251  | -0.000004264 |
| 6  | 0.000003238  | 0.000000312  | -0.00000315  |
| 6  | 0.000001657  | 0.000000094  | -0.000001721 |
| 6  | 0.000000268  | -0.000000483 | -0.000001715 |
| 6  | 0.000000807  | 0.000001442  | -0.000003482 |
| 6  | 0.000002733  | -0.000000037 | -0.000000345 |
| 6  | -0.000000214 | 0.000000665  | 0.000000228  |
| 1  | 0.000001153  | -0.00000075  | -0.000001918 |
| 1  | 0.000001244  | 0.000000442  | -0.000001881 |
| 1  | 0.000001049  | 0.000001345  | -0.000000572 |
| 1  | 0.000000926  | 0.000000049  | -0.000001044 |
| 6  | 0.000000914  | 0.000001795  | -0.00000193  |
| 1  | 0.000001988  | 0.000001763  | -0.000001459 |
| 1  | 0.00000116   | 0.000001743  | -0.000001347 |
| 1  | 0.000001771  | 0.000001289  | -0.000000805 |
| 6  | 0.000004609  | -0.000000658 | 0.000001607  |
| 6  | -0.000001163 | -0.000001441 | -0.000001936 |
| 1  | -0.000000812 | -0.000000161 | -0.000000791 |
| 1  | 0.000000025  | -0.000000536 | 0.000000195  |
| 6  | 0.000000562  | -0.000001976 | -0.000001158 |
| 1  | 0.000000044  | -0.000001443 | -0.000000266 |
| 1  | -0.000000546 | -0.000001009 | 0.000000713  |
| 6  | -0.000000498 | -0.000002015 | -0.000000285 |
| 1  | -0.000000706 | -0.000001073 | -0.000000111 |
| 1  | -0.000000084 | -0.000001277 | -0.000000712 |
| 1  | -0.000000612 | -0.000002002 | -0.000000191 |
| 1  | -0.00000055  | -0.000002151 | -0.000000325 |
| 1  | -0.000000915 | -0.00000169  | 0.000000031  |
| 6  | 0.000000291  | -0.00000545  | -0.00000167  |
| 6  | 0.000000091  | -0.000002957 | -0.00000106  |
| 1  | 0.000000917  | -0.000002271 | 0.000000671  |
| 1  | -0.000001101 | -0.000002013 | -0.000000059 |
| 6  | -0.000000698 | -0.000002146 | -0.000000158 |
| 1  | -0.000000069 | -0.000001661 | -0.000000529 |
| 1  | -0.000000357 | -0.000000437 | -0.000001184 |
| 6  | -0.000000942 | -0.000003057 | -0.000000946 |
| 1  | -0.000000707 | -0.000002576 | -0.000000327 |
| 1  | -0.00000057  | -0.000002782 | -0.000000631 |
| 1  | -0.000000831 | -0.000003358 | -0.000000411 |
| 1  | -0.000000833 | -0.000003164 | -0.000000604 |
| 1  | -0.000001265 | -0.000002681 | 0.000000113  |
| 16 | -0.000006552 | -0.000009446 | -0.000004412 |
| 8  | 0.00000004   | -0.000000896 | -0.000000812 |

|    |              |              |              |
|----|--------------|--------------|--------------|
| 8  | 0.00000221   | -0.000002662 | -0.000002025 |
| 6  | 0.000000771  | 0.000001491  | 0.000000131  |
| 6  | 0.000001312  | -0.000001849 | -0.000001676 |
| 6  | 0.000000958  | -0.00000174  | -0.000001225 |
| 6  | 0.000000902  | 0.000000354  | -0.000001216 |
| 1  | 0.000000992  | 0.000000317  | -0.000001364 |
| 6  | -0.000000419 | -0.000000124 | -0.000001541 |
| 1  | -0.000000045 | -0.000001085 | -0.000001135 |
| 6  | 0.000001     | -0.000000193 | -0.000001286 |
| 1  | 0.000001207  | 0.000000063  | -0.000001596 |
| 1  | 0.000000531  | -0.000000651 | -0.000001081 |
| 6  | 0.000001274  | 0.000001126  | -0.000001041 |
| 1  | 0.000000834  | 0.000000639  | -0.000001301 |
| 1  | 0.000000817  | 0.000000407  | -0.000001051 |
| 1  | 0.000000919  | 0.000000396  | -0.000001403 |
| 79 | -0.000002716 | -0.000001069 | 0.000000388  |
| 6  | 0.000001415  | 0.000001006  | -0.000004147 |
| 6  | 0.000000362  | -0.00000175  | -0.000000955 |
| 6  | -0.000000173 | 0.000005362  | 0.000002491  |
| 1  | -0.000000762 | 0.000002144  | 0.0000013    |
| 1  | -0.000000805 | 0.000001142  | 0.000001786  |
| 7  | -0.000000795 | 0.000003246  | 0.000004081  |
| 7  | -0.000001369 | -0.000001901 | 0.000003653  |
| 6  | -0.000000944 | -0.000000312 | 0.000000262  |
| 6  | 0.000000408  | 0.000001395  | 0.000000206  |
| 6  | 0.000000163  | 0.000000469  | 0.000001413  |
| 6  | -0.000000703 | 0.000000396  | 0.000000563  |
| 6  | -0.000001082 | 0.000000186  | 0.000000898  |
| 6  | -0.000000028 | -0.000000475 | 0.000000484  |
| 1  | 0.000000151  | 0.000000552  | 0.000000151  |
| 1  | -0.000001795 | -0.000000036 | 0.000001542  |
| 1  | -0.000000718 | -0.000000053 | 0.000000701  |
| 6  | -0.000001525 | 0.000001548  | 0.000000286  |
| 6  | -0.000002789 | -0.000000051 | 0.000004558  |
| 6  | 0.000001058  | 0.00000141   | 0.000002871  |
| 6  | 0.000001443  | 0.000001034  | -0.000000286 |
| 6  | 0.000000174  | 0.00000214   | -0.000001503 |
| 6  | -0.000000037 | 0.000001688  | 0.000001216  |
| 1  | 0.000000256  | 0.000001383  | 0.00000105   |
| 1  | 0.000000635  | 0.000001961  | -0.000000017 |
| 1  | 0.000000246  | 0.00000185   | 0.000000693  |
| 6  | 0.000002217  | 0.000001518  | -0.000001807 |
| 6  | -0.000002173 | -0.000000298 | 0.00000349   |
| 6  | -0.000002079 | 0.000000607  | 0.000002439  |

|   |              |              |              |
|---|--------------|--------------|--------------|
| 1 | 0.00000054   | 0.000000329  | 0.000001372  |
| 1 | -0.000000045 | 0.000001286  | 0.000001968  |
| 1 | -0.000001043 | 0.00000122   | 0.000002376  |
| 1 | -0.000000364 | 0.000001909  | 0.000002179  |
| 1 | -0.000000655 | 0.000000212  | 0.000001917  |
| 1 | -0.00000064  | -0.000000013 | 0.00000149   |
| 1 | -0.000001434 | -0.000000082 | 0.000002127  |
| 6 | 0.000000766  | 0.000001069  | -0.000000194 |
| 6 | 0.000000593  | 0.000002003  | -0.000000365 |
| 6 | -0.000000028 | 0.000002485  | 0.000000333  |
| 1 | 0.000000217  | 0.000002023  | -0.000000477 |
| 1 | 0.000000944  | 0.000001402  | -0.000000904 |
| 1 | 0.000001047  | 0.000001983  | -0.000000902 |
| 1 | 0.000001127  | 0.000002062  | -0.000000262 |
| 1 | 0.000000507  | 0.000002891  | 0.000001109  |
| 1 | 0.00000095   | 0.00000281   | 0.000000499  |
| 1 | 0.000000982  | 0.000002326  | 0.000000194  |
| 6 | -0.00000345  | -0.000001292 | 0.000001543  |
| 6 | 0.000000185  | -0.000001497 | 0.000000368  |
| 6 | -0.000000026 | 0.000000586  | 0.000002532  |
| 1 | -0.000000831 | 0.000001077  | 0.000000616  |
| 1 | -0.00000041  | -0.000000878 | 0.000000263  |
| 1 | -0.000001349 | -0.000000703 | 0.000001604  |
| 1 | -0.000000748 | -0.00000174  | 0.000002234  |
| 1 | -0.000001317 | -0.000000041 | 0.000001973  |
| 1 | -0.000001248 | -0.000000066 | 0.000001788  |
| 1 | -0.000001413 | -0.000000024 | 0.000002373  |
| 6 | 0.000001431  | 0.000001036  | 0.000000103  |
| 6 | -0.000000701 | 0.000000986  | -0.000000058 |
| 6 | -0.000001308 | 0.000000732  | 0.000000804  |
| 1 | 0.000000932  | 0.00000109   | 0.000000473  |
| 1 | 0.000000472  | 0.00000143   | 0.00000104   |
| 1 | 0.000000657  | 0.000001842  | 0.000000662  |
| 1 | 0.000000256  | 0.00000124   | 0.000000577  |
| 1 | 0.000001391  | 0.000001119  | -0.000000428 |
| 1 | 0.000000507  | 0.000000679  | -0.000000661 |
| 1 | 0.000001201  | 0.000001009  | -0.000001047 |
| 6 | -0.000000079 | -0.000001417 | 0.000001152  |
| 6 | -0.000000248 | -0.000002491 | -0.000003424 |
| 6 | 0.000000166  | -0.00000102  | 0.000000338  |
| 6 | -0.000000706 | -0.000000773 | 0.00000135   |
| 6 | -0.000001394 | -0.000001459 | 0.00000069   |
| 6 | -0.00000069  | -0.000001712 | 0.000001198  |
| 6 | 0.000002803  | 0.000000637  | -0.000000884 |

|   |              |              |              |
|---|--------------|--------------|--------------|
| 6 | -0.000000844 | -0.000001098 | -0.00000101  |
| 1 | -0.000000617 | -0.000000555 | 0.00000077   |
| 1 | -0.000001413 | -0.000001514 | 0.00000125   |
| 1 | -0.000001162 | -0.000001419 | 0.000001309  |
| 1 | -0.000000882 | -0.000001137 | 0.000000881  |
| 1 | -0.000000426 | -0.000000977 | 0.000000601  |
| 1 | 0.000000633  | 0.000000227  | -0.00000046  |
| 7 | -0.000004225 | 0.000008152  | 0.000001751  |
| 1 | 0.000001911  | 0.000001463  | -0.000001896 |

|                                              |                             |
|----------------------------------------------|-----------------------------|
| Zero-point correction=                       | 1.235113 (Hartree/Particle) |
| Thermal correction to Energy=                | 1.310547                    |
| Thermal correction to Enthalpy=              | 1.311491                    |
| Thermal correction to Gibbs Free Energy=     | 1.114432                    |
| Sum of electronic and zero-point Energies=   | -3798.427545                |
| Sum of electronic and thermal Energies=      | -3798.352112                |
| Sum of electronic and thermal Enthalpies=    | -3798.351167                |
| Sum of electronic and thermal Free Energies= | -3798.548226                |

#### A-TSd1

|    |              |              |              |
|----|--------------|--------------|--------------|
| 6  | -0.000000239 | 0.000000523  | 0.000000135  |
| 6  | 0.000000362  | 0.000001446  | -0.000002279 |
| 7  | 0.000000231  | -0.000000109 | 0.000000025  |
| 7  | -0.000001282 | -0.000001041 | 0.000002668  |
| 16 | 0.000001403  | 0.000000536  | 0.000000841  |
| 8  | 0.000000599  | -0.000000157 | -0.000000199 |
| 8  | -0.000000098 | -0.000000334 | -0.000001277 |
| 6  | 0.000000697  | -0.000000179 | 0.000000173  |
| 6  | 0.000000568  | -0.000000057 | -0.00000046  |
| 6  | 0.000000739  | -0.000000223 | 0.00000002   |
| 6  | 0.00000113   | -0.00000077  | 0.00000094   |
| 6  | 0.00000043   | -0.000000285 | -0.000000063 |
| 6  | 0.000000126  | 0.000000238  | 0.000000175  |
| 1  | 0.000000901  | -0.000000332 | 0.000000252  |
| 1  | 0.000000995  | -0.000000678 | 0.000000545  |
| 1  | 0.000000645  | -0.00000066  | 0.000000421  |
| 1  | 0.000000486  | -0.000000322 | 0.000000315  |
| 6  | 0.000001331  | -0.000001102 | 0.000000848  |
| 1  | 0.000000429  | -0.000000301 | 0.000000254  |
| 1  | 0.000000322  | -0.000000552 | 0.000000196  |
| 1  | 0.000000807  | -0.00000033  | -0.000000139 |
| 6  | 0.000000274  | -0.000000058 | 0.000000157  |
| 6  | 0.000000168  | -0.000000166 | 0.000000054  |
| 1  | 0.000000393  | -0.000000214 | 0.000000129  |
| 1  | 0.000000774  | -0.000000054 | 0.000000429  |

|    |              |              |              |
|----|--------------|--------------|--------------|
| 6  | 0.00000039   | -0.00000019  | 0.000000158  |
| 1  | 0.000000484  | 0.000000182  | 0.000000036  |
| 1  | 0.000000075  | 0.000000023  | -0.000000166 |
| 6  | 0.000000177  | -0.000000054 | 0.000000095  |
| 1  | 0.000000149  | -0.000000267 | 0.000000096  |
| 1  | 0.000000464  | -0.000000021 | 0.000000126  |
| 1  | 0.000000203  | -0.000000125 | 0.000000067  |
| 1  | 0.000000352  | 0.000000074  | -0.000000018 |
| 1  | 0.000000098  | 0.000000093  | -0.000000044 |
| 6  | 0.000000063  | 0.000001038  | -0.000000451 |
| 6  | 0.000000823  | 0.000002725  | -0.000000906 |
| 1  | -0.000000795 | 0.000000137  | -0.000000165 |
| 1  | 0.000000168  | 0.000000922  | -0.000000124 |
| 6  | -0.000000004 | -0.000000083 | 0.000000265  |
| 1  | 0.000001735  | -0.000000482 | -0.000000653 |
| 1  | -0.000000201 | 0.000000169  | -0.000000156 |
| 6  | -0.000000251 | 0.000000843  | -0.000000426 |
| 1  | 0.000000172  | 0.000000567  | 0.000000091  |
| 1  | -0.000000213 | 0.000000318  | -0.000000185 |
| 1  | -0.000000062 | 0.000000557  | -0.000000255 |
| 1  | -0.000000189 | 0.000000596  | -0.000000346 |
| 1  | -0.000000099 | 0.000000755  | -0.000000455 |
| 16 | 0.000000704  | -0.000000276 | -0.000001859 |
| 8  | -0.000000768 | 0.000000869  | -0.000000421 |
| 8  | -0.000000866 | -0.000000106 | -0.000000977 |
| 6  | 0.000000591  | -0.00000171  | 0.000000491  |
| 6  | -0.000000783 | 0.000000594  | -0.000000007 |
| 6  | -0.000000414 | 0.000001415  | -0.000000103 |
| 6  | 0.000000141  | 0.000001157  | -0.000000522 |
| 1  | -0.000000118 | 0.000000449  | -0.000000179 |
| 6  | -0.000001144 | 0.00000103   | -0.000000369 |
| 1  | -0.000002016 | 0.000000837  | 0.000000528  |
| 6  | -0.000000191 | -0.000000034 | -0.000000636 |
| 1  | -0.000000139 | 0.000000848  | -0.000000292 |
| 1  | -0.000000554 | 0.000000836  | -0.000000361 |
| 6  | 0.000000287  | 0.000001544  | 0.000000066  |
| 1  | -0.000000507 | 0.000000966  | -0.000000794 |
| 1  | 0.000000245  | 0.000001168  | -0.000000999 |
| 1  | -0.000001119 | 0.000000772  | -0.000000571 |
| 79 | -0.000000106 | -0.000000471 | 0.000000058  |
| 6  | -0.000000373 | -0.000000502 | 0.000000552  |
| 6  | -0.000000358 | -0.000000465 | 0.000000341  |
| 6  | -0.000000514 | -0.000000497 | 0.000000296  |
| 1  | -0.000000479 | -0.000000532 | 0.000000207  |



|   |              |              |              |
|---|--------------|--------------|--------------|
| 1 | -0.000000367 | -0.000000662 | 0.000000267  |
| 7 | -0.000000145 | -0.000000169 | -0.000000212 |
| 7 | 0.000000006  | -0.000000176 | -0.000000331 |
| 6 | 0.000000018  | -0.000000934 | 0.000000535  |
| 6 | 0.000000016  | -0.000000271 | 0.000000387  |
| 6 | -0.000000595 | -0.000000241 | 0.000000148  |
| 6 | 0.000000134  | -0.000000606 | 0.000000367  |
| 6 | -0.000000498 | -0.000000408 | -0.000000016 |
| 6 | -0.000000015 | -0.000000522 | 0.000000352  |
| 1 | 0.000000177  | -0.000000071 | 0.000000277  |
| 1 | -0.000000213 | -0.000000389 | 0.000000144  |
| 1 | 0.000000065  | -0.000000603 | 0.000000299  |
| 6 | -0.000000487 | -0.000000418 | 0.000000034  |
| 6 | -0.000000495 | -0.000000214 | 0.000000086  |
| 6 | -0.000000092 | -0.000000219 | 0.000000012  |
| 6 | -0.000000551 | 0.000000039  | -0.000000006 |
| 6 | -0.000000431 | 0.000000106  | -0.000000005 |
| 6 | -0.000000412 | -0.000000022 | -0.000000037 |
| 1 | -0.000000753 | 0.000000106  | -0.000000141 |
| 1 | -0.000000264 | -0.000000019 | -0.000000001 |
| 1 | -0.000000435 | 0.000000075  | -0.000000098 |
| 6 | -0.000000789 | -0.000000098 | 0.000000107  |
| 6 | -0.000000809 | -0.000000204 | 0.000000105  |
| 6 | -0.000000702 | 0.000000056  | -0.000000068 |
| 1 | -0.000000609 | -0.000000148 | 0.000000083  |
| 1 | -0.000000718 | -0.000000392 | 0.000000121  |
| 1 | -0.000000923 | -0.000000245 | 0.000000055  |
| 1 | -0.000000891 | -0.000000155 | 0.000000018  |
| 1 | -0.000000488 | -0.000000012 | -0.000000012 |
| 1 | -0.000000837 | 0.000000136  | -0.000000137 |
| 1 | -0.000000784 | -0.000000086 | -0.000000038 |
| 6 | 0.000000073  | -0.000000487 | 0.000000078  |
| 6 | 0.000000194  | -0.000000205 | 0.000000149  |
| 6 | -0.000000045 | -0.000000387 | 0.000000325  |
| 1 | -0.000000004 | -0.000000048 | 0.000000015  |
| 1 | 0.000000257  | 0.000000124  | -0.000000162 |
| 1 | 0.000000278  | -0.000000034 | 0.00000001   |
| 1 | 0.000000163  | -0.000000205 | 0.000000052  |
| 1 | -0.000000277 | -0.000000469 | 0.000000026  |
| 1 | -0.000000158 | -0.000000343 | 0.000000173  |
| 1 | 0.000000031  | -0.000000504 | 0.000000028  |
| 6 | -0.000000067 | -0.000000278 | -0.000000013 |
| 6 | -0.000000305 | -0.000000306 | 0.000000064  |
| 6 | -0.000000451 | -0.000000412 | 0.000000086  |

|   |              |              |              |
|---|--------------|--------------|--------------|
| 1 | -0.000000589 | -0.000000408 | 0.000000187  |
| 1 | -0.000000009 | 0.000000046  | 0.000000086  |
| 1 | -0.000000529 | -0.000000041 | -0.000000048 |
| 1 | -0.000000368 | -0.000000237 | 0.000000151  |
| 1 | -0.000000622 | -0.000000061 | 0.000000268  |
| 1 | -0.000000048 | -0.000000445 | 0.000000164  |
| 1 | -0.000000707 | -0.000000291 | 0.000000014  |
| 6 | 0.000000057  | -0.000000073 | 0.000000484  |
| 6 | -0.000000003 | -0.000000859 | 0.000000046  |
| 6 | 0.000000386  | -0.000000652 | 0.000000224  |
| 1 | -0.000000003 | -0.000000671 | 0.000000417  |
| 1 | -0.000000038 | -0.000000896 | 0.000000392  |
| 1 | 0.000000177  | -0.000000854 | 0.000000466  |
| 1 | 0.000000152  | -0.000000911 | 0.000000529  |
| 1 | 0.000000228  | -0.000000489 | 0.000000121  |
| 1 | 0.000000348  | -0.000000065 | 0.000000469  |
| 1 | 0.000000474  | -0.000000696 | 0.000000541  |
| 6 | 0.000000311  | 0.000000742  | -0.000000044 |
| 6 | 0.000000294  | 0.000000045  | 0.000000183  |
| 6 | 0.000000309  | 0.000000754  | -0.000000163 |
| 6 | 0.000000333  | 0.000000667  | -0.000000564 |
| 6 | 0.000000164  | 0.000001079  | -0.000000263 |
| 6 | 0.000000078  | 0.000000826  | -0.000000312 |
| 6 | 0.000000607  | 0.000000655  | -0.000000803 |
| 6 | -0.000000168 | 0.000000977  | -0.000000026 |
| 1 | 0.000000684  | 0.000000427  | -0.000000439 |
| 1 | 0.000000479  | 0.000000077  | -0.000000455 |
| 1 | 0.000000368  | 0.000001028  | -0.000000514 |
| 1 | 0.000000393  | 0.000000859  | -0.000000587 |
| 1 | 0.000000293  | 0.000000817  | -0.000000445 |
| 1 | 0.000000496  | 0.000000358  | -0.000000178 |
| 7 | 0.000000819  | -0.000001038 | -0.000000348 |
| 1 | 0.000001213  | 0.000001834  | 0.000001003  |

Zero-point correction=

1.233259 (Hartree/Particle)

Thermal correction to Energy=

1.309047

Thermal correction to Enthalpy=

1.309992

Thermal correction to Gibbs Free Energy=

1.111127

Sum of electronic and zero-point Energies=

-3798.449145

Sum of electronic and thermal Energies=

-3798.373356

Sum of electronic and thermal Enthalpies=

-3798.372412

Sum of electronic and thermal Free Energies=

-3798.571277

A-1d

|   |              |              |             |
|---|--------------|--------------|-------------|
| 6 | -0.000002306 | -0.000000595 | 0.000000606 |
|---|--------------|--------------|-------------|

|    |              |              |              |
|----|--------------|--------------|--------------|
| 6  | -0.000001072 | 0.000006899  | -0.000000789 |
| 7  | 0.000002486  | 0.000001741  | -0.000001859 |
| 7  | -0.000000388 | -0.000004697 | -0.000001073 |
| 16 | -0.000001886 | -0.000000985 | 0.000000017  |
| 8  | -0.00000124  | -0.000000268 | -0.000002029 |
| 8  | 0.000000296  | 0.000000688  | -0.000002925 |
| 6  | 0.00000169   | 0.000000772  | -0.000003984 |
| 6  | -0.000002864 | 0.00000093   | -0.000002521 |
| 6  | 0.000000379  | 0.00000222   | -0.000004029 |
| 6  | -0.000000033 | 0.000003124  | -0.000000154 |
| 6  | -0.000000273 | 0.000001911  | -0.000002433 |
| 6  | 0.000000629  | 0.000002263  | -0.000000094 |
| 1  | -0.000000366 | 0.000000034  | -0.000002432 |
| 1  | -0.000000814 | 0.000000468  | -0.000002777 |
| 1  | 0.000000361  | 0.000001292  | -0.000001098 |
| 1  | 0.000000384  | 0.000000311  | -0.000002891 |
| 6  | -0.000000125 | -0.000000834 | -0.000003392 |
| 1  | 0.000001186  | 0.000003145  | -0.000000302 |
| 1  | -0.000000707 | 0.000003357  | -0.000002531 |
| 1  | -0.000001376 | 0.00000265   | -0.000003734 |
| 6  | -0.000001806 | -0.000001163 | -0.000000126 |
| 6  | -0.00000088  | -0.000001864 | -0.000001032 |
| 1  | -0.000000992 | 0.00000004   | -0.000001421 |
| 1  | -0.000000563 | -0.000000063 | -0.000001061 |
| 6  | -0.000000885 | -0.000001343 | -0.000001494 |
| 1  | -0.00000106  | -0.000000942 | -0.000001552 |
| 1  | -0.000000838 | -0.000000915 | -0.000000844 |
| 6  | -0.000001102 | -0.000002157 | -0.000001251 |
| 1  | -0.000000813 | -0.000001433 | -0.000001161 |
| 1  | -0.000001261 | -0.000001394 | -0.000001749 |
| 1  | -0.00000146  | -0.000002248 | -0.000001392 |
| 1  | -0.000001453 | -0.000002207 | -0.000001583 |
| 1  | -0.000001249 | -0.000002136 | -0.000000832 |
| 6  | 0.000000033  | 0.000000057  | 0.000000845  |
| 6  | 0.000001368  | -0.000000104 | 0.000001411  |
| 1  | 0.00000063   | -0.000000193 | 0.000000928  |
| 1  | -0.00000005  | 0.000000821  | -0.000000267 |
| 6  | 0.000000491  | 0.000000692  | 0.000000795  |
| 1  | 0.000000149  | -0.000000108 | 0.0000014    |
| 1  | -0.00000006  | 0.000000076  | 0.000000592  |
| 6  | 0.000000754  | 0.000000694  | 0.000001446  |
| 1  | 0.00000076   | 0.00000105   | 0.000000793  |
| 1  | 0.000000714  | 0.000000735  | 0.000001289  |
| 1  | 0.000001028  | 0.000001057  | 0.000001639  |

|    |              |              |              |
|----|--------------|--------------|--------------|
| 1  | 0.000000831  | 0.00000035   | 0.000001813  |
| 1  | 0.000000708  | 0.000000633  | 0.0000013    |
| 16 | 0.000001537  | 0.000001158  | 0.000003327  |
| 8  | -0.000001859 | -0.000001368 | -0.000001469 |
| 8  | -0.000001936 | -0.00000126  | 0.000001134  |
| 6  | -0.000000334 | -0.000000882 | -0.000000059 |
| 6  | 0.000000968  | -0.000001661 | 0.000000121  |
| 6  | -0.000000465 | -0.000002297 | 0.000000219  |
| 6  | -0.000001235 | -0.000002392 | 0.000001288  |
| 1  | -0.000000661 | -0.000001604 | 0.000000684  |
| 6  | 0.000001668  | -0.000001742 | 0.000003253  |
| 1  | 0.000000694  | -0.000001013 | 0.000002183  |
| 6  | -0.000002378 | -0.000001945 | 0.000004037  |
| 1  | -0.000000182 | -0.000001667 | 0.000000969  |
| 1  | 0.000000146  | -0.000001338 | 0.000002051  |
| 6  | 0.000002495  | -0.000001682 | -0.000000754 |
| 1  | -0.000001291 | -0.000002258 | 0.000002219  |
| 1  | 0.00000062   | -0.000001297 | 0.000002931  |
| 1  | -0.000000008 | -0.000002294 | 0.000002933  |
| 79 | -0.000001215 | -0.000000339 | 0.00000078   |
| 6  | 0.000001927  | 0.00000187   | -0.000002478 |
| 6  | -0.000001516 | -0.000000535 | -0.000000026 |
| 6  | 0.000002001  | 0.000001475  | 0.000001823  |
| 1  | 0.000000925  | 0.000000762  | 0.000001355  |
| 1  | -0.000000199 | -0.00000021  | -0.000000047 |
| 7  | 0.000001355  | -0.000001343 | 0.000001172  |
| 7  | -0.000001455 | 0.000000298  | 0.000000717  |
| 6  | -0.000001853 | 0.000001094  | 0.00000076   |
| 6  | 0.000000456  | 0.000000407  | -0.000000908 |
| 6  | 0.000000159  | -0.000001146 | 0.000000136  |
| 6  | -0.000000485 | -0.000000578 | -0.000000665 |
| 6  | -0.000000649 | -0.000001102 | -0.000000392 |
| 6  | -0.00000115  | -0.000000706 | -0.000000957 |
| 1  | -0.000000746 | -0.000000322 | -0.000001582 |
| 1  | -0.000001154 | -0.000001688 | -0.00000068  |
| 1  | -0.000000913 | -0.000001262 | -0.000001302 |
| 6  | 0.000000532  | -0.000000433 | 0.000000179  |
| 6  | 0.000001156  | 0.000001423  | 0.000001538  |
| 6  | -0.000000109 | 0.000002331  | 0.000000939  |
| 6  | 0.000001284  | 0.00000075   | 0.000001849  |
| 6  | 0.000001481  | 0.000001655  | 0.000001102  |
| 6  | 0.000000894  | 0.000000941  | 0.000001232  |
| 1  | 0.000001339  | 0.000000661  | 0.000002081  |
| 1  | 0.000000919  | 0.000001752  | 0.00000088   |

|   |              |              |              |
|---|--------------|--------------|--------------|
| 1 | 0.000001263  | 0.000001699  | 0.00000181   |
| 6 | 0.000000235  | -0.000000556 | 0.000001869  |
| 6 | 0.000001141  | 0.000000931  | 0.000002225  |
| 6 | 0.000000734  | 0.000000359  | 0.00000162   |
| 1 | 0.000000875  | -0.000000244 | 0.000001612  |
| 1 | 0.000001462  | 0.000000637  | 0.000002363  |
| 1 | 0.000000761  | -0.000000156 | 0.000002436  |
| 1 | 0.000001266  | 0.00000032   | 0.000002472  |
| 1 | 0.00000015   | -0.000000595 | 0.000001837  |
| 1 | 0.000000658  | -0.000000085 | 0.000002447  |
| 1 | 0.000000542  | -0.000000903 | 0.00000227   |
| 6 | 0.000000746  | 0.000001773  | 0.000000352  |
| 6 | 0.000000693  | 0.000001676  | -0.000000491 |
| 6 | 0.000000989  | 0.000002166  | 0.000000242  |
| 1 | 0.000000553  | 0.000001353  | 0.000000344  |
| 1 | 0.000000348  | 0.000001098  | -0.000000379 |
| 1 | 0.000000753  | 0.000002314  | -0.000000333 |
| 1 | 0.00000092   | 0.000002369  | -0.000000144 |
| 1 | 0.000000985  | 0.000002031  | 0.000000487  |
| 1 | 0.000001126  | 0.000002437  | 0.000000387  |
| 1 | 0.000000931  | 0.000002373  | -0.000000164 |
| 6 | -0.000000663 | -0.000001285 | 0.00000067   |
| 6 | -0.000000068 | -0.000001004 | 0.000000505  |
| 6 | 0.000000045  | -0.000001149 | 0.000000949  |
| 1 | 0.00000021   | -0.000000911 | 0.000000659  |
| 1 | -0.000000219 | -0.000001448 | 0.000000037  |
| 1 | -0.000000263 | -0.000001646 | 0.000001084  |
| 1 | -0.000000073 | -0.000001407 | 0.000000204  |
| 1 | -0.000000074 | -0.000000884 | 0.000000949  |
| 1 | -0.000000451 | -0.000001893 | 0.000000535  |
| 1 | -0.000000109 | -0.000001377 | 0.000001207  |
| 6 | 0.000000253  | -0.000000102 | -0.000001332 |
| 6 | -0.000000159 | 0.000001171  | -0.000000827 |
| 6 | -0.00000025  | 0.000001177  | -0.000001639 |
| 1 | 0.000000615  | 0.000000915  | -0.000000608 |
| 1 | -0.000000108 | 0.000000755  | -0.000000621 |
| 1 | 0.000000058  | 0.000001345  | -0.000001333 |
| 1 | -0.000000125 | 0.000000473  | -0.000001026 |
| 1 | 0.00000019   | 0.000000491  | -0.000001902 |
| 1 | -0.000000478 | 0.000000412  | -0.000001767 |
| 1 | -0.000000094 | 0.000001505  | -0.000001496 |
| 6 | -0.000000235 | -0.00000113  | -0.000000946 |
| 6 | -0.00000154  | 0.000000038  | -0.000000244 |
| 6 | 0.000000219  | 0.000000883  | -0.000000125 |

|   |              |              |              |
|---|--------------|--------------|--------------|
| 6 | -0.00000003  | 0.000000312  | -0.000000309 |
| 6 | -0.000000222 | 0.000000066  | -0.000000486 |
| 6 | -0.00000005  | -0.000000547 | -0.000000437 |
| 6 | 0.000000095  | -0.000000802 | -0.000000195 |
| 6 | -0.000002177 | -0.00000046  | -0.000002614 |
| 1 | 0.000000027  | 0.000000606  | -0.000000593 |
| 1 | 0.000000165  | 0.000000791  | -0.000000258 |
| 1 | -0.000000202 | 0.000000104  | -0.000000218 |
| 1 | -0.000000589 | -0.000000947 | -0.000000371 |
| 1 | -0.000000096 | -0.000001753 | -0.000000668 |
| 1 | -0.000000597 | -0.000001414 | -0.000000463 |
| 7 | 0.00000545   | -0.000002726 | 0.0000016    |
| 1 | -0.000001986 | -0.000001726 | -0.000001816 |

|                                              |                             |
|----------------------------------------------|-----------------------------|
| Zero-point correction=                       | 1.235089 (Hartree/Particle) |
| Thermal correction to Energy=                | 1.310680                    |
| Thermal correction to Enthalpy=              | 1.311624                    |
| Thermal correction to Gibbs Free Energy=     | 1.113201                    |
| Sum of electronic and zero-point Energies=   | -3798.460625                |
| Sum of electronic and thermal Energies=      | -3798.385033                |
| Sum of electronic and thermal Enthalpies=    | -3798.384089                |
| Sum of electronic and thermal Free Energies= | -3798.582512                |

#### A-TSe1

|    |              |              |              |
|----|--------------|--------------|--------------|
| 6  | -0.00000329  | -0.000004829 | 0.000000108  |
| 6  | -0.000000754 | -0.000001428 | -0.00000171  |
| 7  | 0.000003491  | 0.000002968  | 0.000001409  |
| 7  | 0.000000144  | -0.00000027  | -0.000001358 |
| 16 | 0.000000394  | -0.000001663 | -0.000000333 |
| 8  | 0.00000011   | -0.000001977 | 0.000000863  |
| 8  | -0.000000251 | -0.000002105 | -0.000000404 |
| 6  | 0.000000389  | -0.000001673 | 0.000000362  |
| 6  | -0.000000015 | -0.000001387 | 0.000000567  |
| 6  | -0.000000079 | -0.000001692 | 0.000001057  |
| 6  | 0.000000976  | 0.000001359  | 0.000002264  |
| 6  | 0.000000817  | -0.000000993 | -0.000000605 |
| 6  | 0.000000005  | -0.00000139  | -0.000000414 |
| 1  | 0.000000286  | -0.000001869 | 0.000001142  |
| 1  | 0.000000446  | -0.000001952 | 0.000001362  |
| 1  | -0.000000232 | -0.000001357 | -0.000000547 |
| 1  | -0.000000075 | -0.000001379 | -0.000000813 |
| 6  | -0.000000548 | -0.000003735 | -0.000000407 |
| 1  | 0.000003049  | -0.000001149 | -0.000001206 |
| 1  | -0.000000536 | -0.000002652 | 0.000000412  |
| 1  | -0.000002663 | -0.000002153 | 0.000001581  |

|    |              |              |              |
|----|--------------|--------------|--------------|
| 6  | 0.000000597  | -0.000001055 | 0.000000444  |
| 6  | 0.000000282  | -0.000000361 | 0.000001292  |
| 1  | 0.000000423  | -0.000000899 | 0.000001147  |
| 1  | 0.000000346  | -0.000001533 | 0.000001115  |
| 6  | 0.000000756  | -0.000000747 | 0.000001796  |
| 1  | 0.000000236  | 0.000000184  | 0.000000914  |
| 1  | 0.000000312  | -0.000000845 | 0.000001107  |
| 6  | 0.000000694  | -0.000000302 | 0.000002165  |
| 1  | 0.000000669  | -0.000001214 | 0.000001978  |
| 1  | 0.000000691  | -0.000000349 | 0.000002047  |
| 1  | 0.000000861  | -0.000000344 | 0.000002706  |
| 1  | 0.000000626  | 0.000000176  | 0.000002098  |
| 1  | 0.000000708  | -0.000000386 | 0.000002128  |
| 6  | -0.000000021 | 0.000000162  | -0.000000244 |
| 6  | 0.000000004  | 0.000000394  | -0.000000319 |
| 1  | 0.000000027  | 0.000000539  | -0.000000712 |
| 1  | 0.000000409  | 0.000000303  | -0.000000015 |
| 6  | -0.000000057 | 0.000000489  | 0.000000037  |
| 1  | -0.000000148 | -0.000000026 | -0.000000388 |
| 1  | 0.000000061  | -0.000000429 | 0.000000267  |
| 6  | 0.000000249  | 0.000000048  | 0.000000065  |
| 1  | 0.000000299  | 0.000000782  | 0.000000636  |
| 1  | -0.000000012 | 0.000001074  | 0.000000008  |
| 1  | 0.000000275  | 0.000000962  | 0.000000924  |
| 1  | 0.000000137  | 0.000000489  | 0.000000244  |
| 1  | 0.000000349  | 0.000000118  | 0.000001002  |
| 16 | -0.000000478 | -0.000000692 | -0.000000491 |
| 8  | -0.000000402 | 0.000000194  | -0.000001893 |
| 8  | -0.000000761 | -0.000000922 | -0.000001989 |
| 6  | -0.000000697 | -0.000000243 | -0.000001986 |
| 6  | -0.000000749 | 0.000000469  | -0.000002336 |
| 6  | -0.000000683 | -0.000000299 | -0.000002396 |
| 6  | -0.000000831 | 0.000000058  | -0.000002986 |
| 1  | -0.000000662 | 0.000001042  | -0.000002135 |
| 6  | -0.000001072 | 0.000000015  | -0.000002959 |
| 1  | -0.000000842 | -0.000001007 | -0.000002559 |
| 6  | -0.000001121 | 0.000000486  | -0.000002868 |
| 1  | -0.000000962 | 0.000001357  | -0.000002966 |
| 1  | -0.00000114  | -0.000000525 | -0.000003301 |
| 6  | -0.000001435 | 0.000000792  | -0.000003776 |
| 1  | -0.000001182 | 0.000000596  | -0.000004345 |
| 1  | -0.000001284 | 0.00000109   | -0.000003607 |
| 1  | -0.000001005 | 0.000000349  | -0.00000378  |
| 79 | -0.000000195 | -0.000000294 | 0.000000346  |

|   |              |              |              |
|---|--------------|--------------|--------------|
| 6 | 0.000000161  | 0.000000308  | 0.000000777  |
| 6 | 0.000000155  | 0.000001286  | 0.000000158  |
| 6 | 0.000000435  | 0.00000153   | 0.000000364  |
| 1 | 0.000000615  | 0.000001663  | 0.000000658  |
| 1 | -0.000000011 | 0.000001508  | 0.000000001  |
| 7 | -0.000000022 | 0.000001     | -0.000000004 |
| 7 | -0.00000001  | 0.000001503  | 0.000000983  |
| 6 | 0.000000127  | 0.000000554  | -0.000000452 |
| 6 | -0.000000072 | 0.000000136  | -0.000000243 |
| 6 | -0.000000434 | 0.00000039   | -0.000001332 |
| 6 | -0.000000122 | -0.000000307 | -0.000000674 |
| 6 | -0.000000622 | 0.000000088  | -0.000001502 |
| 6 | -0.000000467 | -0.00000014  | -0.000001257 |
| 1 | -0.000000176 | -0.000000484 | -0.000000626 |
| 1 | -0.000000069 | 0.000000196  | -0.000002062 |
| 1 | -0.000000554 | -0.000000415 | -0.000001668 |
| 6 | 0.000000322  | 0.0000011    | 0.000000619  |
| 6 | 0.000000357  | 0.000001352  | 0.000001107  |
| 6 | 0.000000444  | 0.00000082   | 0.000001384  |
| 6 | 0.000000142  | 0.000001884  | 0.000000912  |
| 6 | 0.000000862  | 0.000000782  | 0.000002167  |
| 6 | 0.000000682  | 0.000001127  | 0.000001841  |
| 1 | 0.00000009   | 0.000001889  | 0.000000973  |
| 1 | 0.000000837  | 0.000000536  | 0.000002649  |
| 1 | 0.000000079  | 0.000001415  | 0.000002216  |
| 6 | 0.000000294  | 0.000001145  | 0.000000463  |
| 6 | 0.000000278  | 0.000002625  | 0.000000551  |
| 6 | 0.000000489  | 0.000002512  | -0.000000068 |
| 1 | -0.000000491 | 0.000002215  | -0.000000621 |
| 1 | -0.000000223 | 0.000003081  | 0.000000807  |
| 1 | 0.000000043  | 0.000002871  | 0.000000054  |
| 1 | 0.000000768  | 0.00000346   | 0.000000829  |
| 1 | -0.000000829 | 0.000001165  | 0.000000017  |
| 1 | 0.000000083  | 0.000001805  | 0.000000619  |
| 1 | -0.000000305 | 0.000002156  | -0.000000754 |
| 6 | 0.000000697  | 0.000000621  | 0.000001815  |
| 6 | 0.000000609  | -0.000000019 | 0.000002027  |
| 6 | 0.000000687  | 0.000000816  | 0.000002158  |
| 1 | 0.000000474  | 0.000000371  | 0.000001545  |
| 1 | 0.000000236  | -0.000000875 | 0.00000139   |
| 1 | 0.000000709  | -0.000000455 | 0.000002166  |
| 1 | 0.000000711  | -0.000000107 | 0.000002432  |
| 1 | 0.000000668  | 0.000001392  | 0.000002063  |
| 1 | 0.000000858  | 0.000000945  | 0.000002731  |



|                                                     |              |              |                                    |
|-----------------------------------------------------|--------------|--------------|------------------------------------|
| 1                                                   | 0.00000074   | 0.000000609  | 0.000002384                        |
| 6                                                   | -0.00000022  | 0.000000828  | -0.000001148                       |
| 6                                                   | -0.000000485 | 0.000000393  | -0.000001727                       |
| 6                                                   | -0.00000056  | 0.00000147   | -0.00000155                        |
| 1                                                   | -0.000000211 | 0.000000949  | -0.000000977                       |
| 1                                                   | -0.000000581 | 0.00000001   | -0.000001709                       |
| 1                                                   | -0.000000622 | 0.000000715  | -0.000001829                       |
| 1                                                   | -0.000000652 | 0.000000394  | -0.000002162                       |
| 1                                                   | -0.000000491 | 0.000001788  | -0.000001328                       |
| 1                                                   | -0.000000596 | 0.000001385  | -0.000001918                       |
| 1                                                   | -0.00000058  | 0.000001788  | -0.000001811                       |
| 6                                                   | -0.00000004  | 0.000000083  | 0.000000369                        |
| 6                                                   | 0.000000138  | 0.000000396  | 0.000000457                        |
| 6                                                   | 0.000000185  | -0.000000589 | 0.000000554                        |
| 1                                                   | 0.000000203  | 0.000000271  | 0.000000581                        |
| 1                                                   | 0.000000147  | 0.000000944  | 0.000000329                        |
| 1                                                   | 0.000000315  | 0.000000465  | 0.000000096                        |
| 1                                                   | 0.000000092  | 0.000000234  | 0.000000205                        |
| 1                                                   | 0.000000096  | -0.000000521 | 0.000000769                        |
| 1                                                   | 0.000000097  | -0.000000909 | 0.000000401                        |
| 1                                                   | 0.000000378  | -0.000000567 | 0.000001096                        |
| 8                                                   | -0.000000297 | -0.000000434 | -0.000000097                       |
| 6                                                   | 0.000000114  | -0.00000193  | 0.000000486                        |
| 6                                                   | 0.000000233  | -0.000002587 | 0.000000716                        |
| 6                                                   | 0.000000138  | -0.000002073 | 0.000000667                        |
| 6                                                   | 0.000000032  | -0.000001915 | -0.000000184                       |
| 6                                                   | -0.00000008  | -0.00000214  | -0.000000033                       |
| 1                                                   | 0.00000023   | -0.000002552 | 0.000000739                        |
| 1                                                   | 0.000000465  | -0.000002254 | 0.000000554                        |
| 7                                                   | -0.000001339 | -0.000000061 | 0.000000173                        |
| 8                                                   | 0.000000145  | -0.000002936 | -0.000001665                       |
| 1                                                   | -0.000000074 | -0.000001914 | -0.000000185                       |
| 1                                                   | 0.000000035  | -0.000002739 | 0.000001072                        |
| 17                                                  | -0.000000554 | -0.000001267 | -0.000001195                       |
| <b>Zero-point correction=</b>                       |              |              | <b>1.191755 (Hartree/Particle)</b> |
| <b>Thermal correction to Energy=</b>                |              |              | <b>1.267875</b>                    |
| <b>Thermal correction to Enthalpy=</b>              |              |              | <b>1.268820</b>                    |
| <b>Thermal correction to Gibbs Free Energy=</b>     |              |              | <b>1.072668</b>                    |
| <b>Sum of electronic and zero-point Energies=</b>   |              |              | <b>-4292.957142</b>                |
| <b>Sum of electronic and thermal Energies=</b>      |              |              | <b>-4292.881022</b>                |
| <b>Sum of electronic and thermal Enthalpies=</b>    |              |              | <b>-4292.880078</b>                |
| <b>Sum of electronic and thermal Free Energies=</b> |              |              | <b>-4293.076229</b>                |

A-1e

|    |              |              |              |
|----|--------------|--------------|--------------|
| 6  | -0.000002109 | -0.000009532 | 0.000006456  |
| 6  | 0.000019873  | 0.000007581  | -0.000011766 |
| 7  | -0.000009526 | 0.00001292   | 0.00000448   |
| 7  | -0.00000205  | -0.000004142 | 0.000004852  |
| 16 | 0.00000196   | -0.000007123 | -0.000007531 |
| 8  | 0.000001826  | 0.00000045   | 0.000001457  |
| 8  | 0.000003178  | 0.000007788  | 0.000003157  |
| 6  | -0.00000147  | 0.000004151  | 0.00000024   |
| 6  | -0.000000443 | -0.000001643 | 0.000002616  |
| 6  | -0.000002511 | 0.000002083  | -0.000001503 |
| 6  | 0.00000082   | -0.000004293 | 0.000003491  |
| 6  | 0.00000148   | 0.000002048  | 0.00000309   |
| 6  | -0.000000997 | -0.000000213 | -0.000000059 |
| 1  | 0.000001151  | 0.000001987  | 0.000001472  |
| 1  | -0.000000197 | 0.00000102   | 0.000002098  |
| 1  | -0.000000334 | 0.000000168  | 0.000000662  |
| 1  | -0.000000221 | 0.000000369  | 0.000002447  |
| 6  | 0.000000624  | 0.000000231  | 0.000001585  |
| 1  | -0.000000226 | 0.000000324  | 0.000001034  |
| 1  | -0.000000033 | 0.000001884  | 0.000001368  |
| 1  | -0.000000359 | 0.000000573  | 0.00000255   |
| 6  | 0.000010504  | -0.00000785  | 0.000004197  |
| 6  | 0.000002212  | 0.00000988   | -0.000001516 |
| 1  | -0.000003063 | 0.000001432  | -0.000001567 |
| 1  | 0.000000697  | 0.000001547  | 0.000000491  |
| 6  | -0.00000132  | -0.00000525  | 0.000002535  |
| 1  | -0.000001073 | -0.000000803 | 0.000002536  |
| 1  | -0.000001321 | 0.000000302  | 0.000000264  |
| 6  | 0.000001083  | 0.000001045  | 0.000001162  |
| 1  | 0.000000004  | 0.00000135   | 0.000000858  |
| 1  | 0.000000092  | 0.000001644  | 0.000000074  |
| 1  | -0.000000951 | 0.000000416  | 0.000002988  |
| 1  | 0.000000145  | 0.000000131  | 0.000000713  |
| 1  | -0.000000977 | -0.000000563 | 0.000001734  |
| 6  | -0.000002373 | 0.000001048  | 0.000006189  |
| 6  | 0.000002182  | -0.000004414 | -0.000000478 |
| 1  | -0.000001326 | 0.000001487  | 0.000001838  |
| 1  | -0.000001141 | -0.00000193  | -0.000001314 |
| 6  | -0.00000486  | -0.000000235 | -0.000000247 |
| 1  | 0.000000437  | 0.000001754  | -0.000000324 |
| 1  | 0.000000244  | -0.00000046  | 0.000001199  |
| 6  | 0.000000099  | 0.000000405  | 0.000000777  |
| 1  | -0.00000018  | -0.000000943 | 0.000000222  |
| 1  | -0.000000894 | -0.00000116  | 0.000001483  |

|    |              |              |              |
|----|--------------|--------------|--------------|
| 1  | -0.000001158 | -0.000000399 | 0.000000614  |
| 1  | -0.000001074 | -0.000000644 | 0.000001202  |
| 1  | -0.000000269 | -0.000000362 | 0.000000853  |
| 16 | 0.000005639  | -0.000000661 | -0.000010327 |
| 8  | 0.000001136  | -0.000000931 | 0.000001268  |
| 8  | 0.000000463  | 0.000003047  | 0.000004362  |
| 6  | -0.000000969 | 0.000002779  | 0.000002327  |
| 6  | -0.000001046 | 0.000001909  | -0.000002093 |
| 6  | -0.000001567 | 0.000000871  | -0.000002523 |
| 6  | -0.000002276 | -0.000000664 | -0.000001237 |
| 1  | 0.000000171  | -0.000001208 | -0.000000068 |
| 6  | 0.000000775  | -0.000001011 | -0.000001638 |
| 1  | 0.000001384  | 0.000000391  | 0.000000256  |
| 6  | 0.000001027  | -0.000000496 | 0.000000394  |
| 1  | 0.000000001  | -0.000001065 | -0.000001265 |
| 1  | 0.000000933  | -0.000000032 | -0.000001278 |
| 6  | 0.000000301  | -0.000000035 | -0.000000527 |
| 1  | 0.000000131  | -0.000000236 | -0.000003671 |
| 1  | 0.000001151  | -0.000000944 | -0.000001539 |
| 1  | -0.000001025 | 0.000000056  | -0.000001698 |
| 79 | -0.000001718 | 0.000000467  | -0.000008934 |
| 6  | 0.000007241  | -0.000004374 | 0.000001183  |
| 6  | -0.000002997 | 0.000002997  | -0.000001705 |
| 6  | 0.000002056  | -0.000005931 | 0.000000994  |
| 1  | -0.00000119  | -0.000000024 | -0.000000529 |
| 1  | -0.000001394 | -0.000000078 | -0.00000139  |
| 7  | 0.000002574  | -0.000002672 | -0.000002078 |
| 7  | -0.000004497 | 0.000006726  | 0.000000562  |
| 6  | -0.000001604 | -0.000000053 | -0.000005079 |
| 6  | 0.000002989  | 0.000000564  | 0.000001828  |
| 6  | -0.000001471 | 0.000004434  | 0.000001776  |
| 6  | -0.000000406 | 0.000000566  | 0.000000234  |
| 6  | 0.000001247  | -0.000000891 | -0.000002722 |
| 6  | 0.000000439  | -0.000001315 | -0.00000188  |
| 1  | 0.00000103   | 0.000000336  | -0.000001634 |
| 1  | 0.000000037  | -0.000000466 | -0.00000133  |
| 1  | 0.000001093  | 0.000000216  | -0.000001792 |
| 6  | -0.000002287 | 0.000001701  | -0.000002753 |
| 6  | 0.000001771  | -0.000000445 | 0.000002573  |
| 6  | -0.000001129 | -0.000003869 | 0.000002402  |
| 6  | -0.000000483 | -0.000001918 | -0.000000023 |
| 6  | 0.000000016  | -0.000000026 | 0.000000982  |
| 6  | -0.000001025 | -0.000000236 | 0.000000653  |
| 1  | -0.000000568 | -0.000000779 | 0.000000832  |

|   |              |              |              |
|---|--------------|--------------|--------------|
| 1 | -0.000000854 | -0.000000183 | 0.000000263  |
| 1 | -0.000001542 | -0.000000895 | 0.000001627  |
| 6 | -0.000000389 | -0.000000741 | -0.000002551 |
| 6 | -0.000001768 | -0.000001203 | 0.000001977  |
| 6 | -0.000000615 | 0.000000158  | -0.000000278 |
| 1 | -0.000000405 | -0.000000778 | -0.000000012 |
| 1 | -0.000000085 | -0.000001503 | -0.000000344 |
| 1 | -0.000001091 | -0.00000108  | -0.000000698 |
| 1 | -0.000000206 | -0.000001036 | -0.000000441 |
| 1 | 0.000001009  | -0.000000826 | -0.000000047 |
| 1 | -0.000000717 | -0.000000097 | 0.000001139  |
| 1 | -0.000000969 | -0.000001109 | 0.000000064  |
| 6 | 0.000000456  | 0.000000598  | 0.00000128   |
| 6 | 0.000000273  | -0.000000448 | 0.000000513  |
| 6 | -0.000000714 | 0.000000053  | -0.000000508 |
| 1 | -0.000001299 | -0.000001312 | 0.000000489  |
| 1 | 0.000000323  | 0.000000127  | -0.000000029 |
| 1 | 0.000000109  | 0.000000017  | 0.000000418  |
| 1 | 0.000000296  | -0.000000114 | 0.000001643  |
| 1 | -0.000000042 | -0.000001127 | 0.000000023  |
| 1 | -0.000000802 | -0.000000184 | 0.000000493  |
| 1 | 0.000000031  | -0.000000253 | 0.000000265  |
| 6 | -0.000000841 | -0.000001885 | -0.000002231 |
| 6 | 0.000002385  | 0.000000079  | 0.000000992  |
| 6 | 0.000001091  | -0.000000656 | -0.000002763 |
| 1 | -0.000000189 | -0.000000202 | -0.000000529 |
| 1 | -0.000000664 | -0.000000218 | -0.000001224 |
| 1 | -0.000000002 | -0.000000571 | -0.000001633 |
| 1 | -0.000000277 | 0.000000225  | -0.000002179 |
| 1 | -0.000000266 | -0.000000448 | -0.000001444 |
| 1 | -0.000000321 | -0.000000627 | -0.000000083 |
| 1 | -0.000000024 | -0.000001002 | -0.000001433 |
| 6 | -0.000000201 | -0.000000693 | -0.000002038 |
| 6 | 0.000000078  | -0.000000409 | 0.000001123  |
| 6 | 0.000001618  | 0.000000784  | -0.000002377 |
| 1 | 0.000000252  | -0.00000002  | 0.000000723  |
| 1 | 0.000000103  | -0.000000937 | -0.000000417 |
| 1 | 0.000000394  | -0.000000181 | -0.000000937 |
| 1 | 0.000000016  | 0.000000763  | -0.000000824 |
| 1 | 0.000003238  | -0.000000282 | -0.000002773 |
| 1 | 0.000000737  | 0.000000508  | -0.000000558 |
| 1 | 0.000000033  | 0.000000176  | -0.000000425 |
| 8 | -0.000008644 | -0.000005924 | 0.000007764  |
| 6 | -0.000000648 | 0.000005379  | 0.000003989  |

|                                                     |              |              |                                    |
|-----------------------------------------------------|--------------|--------------|------------------------------------|
| 6                                                   | 0.000005794  | -0.000001104 | 0.000002496                        |
| 6                                                   | -0.000002317 | -0.000000178 | -0.000002076                       |
| 6                                                   | -0.000001481 | 0.000000059  | 0.000001634                        |
| 6                                                   | 0.000007499  | 0.000003638  | -0.000002696                       |
| 1                                                   | 0.000002384  | 0.000002387  | -0.000000064                       |
| 1                                                   | 0.000001565  | 0.000000096  | -0.000002149                       |
| 7                                                   | -0.000005414 | 0.000003163  | -0.000009593                       |
| 8                                                   | -0.000007341 | 0.000000171  | 0.000000709                        |
| 1                                                   | 0.000000481  | -0.000000356 | 0.000001819                        |
| 1                                                   | 0.000001373  | 0.000001368  | 0.000000982                        |
| 17                                                  | -0.000001889 | -0.000002011 | 0.000002513                        |
| <b>Zero-point correction=</b>                       |              |              | <b>1.192350 (Hartree/Particle)</b> |
| <b>Thermal correction to Energy=</b>                |              |              | <b>1.268908</b>                    |
| <b>Thermal correction to Enthalpy=</b>              |              |              | <b>1.269852</b>                    |
| <b>Thermal correction to Gibbs Free Energy=</b>     |              |              | <b>1.072585</b>                    |
| <b>Sum of electronic and zero-point Energies=</b>   |              |              | <b>-4292.956921</b>                |
| <b>Sum of electronic and thermal Energies=</b>      |              |              | <b>-4292.880363</b>                |
| <b>Sum of electronic and thermal Enthalpies=</b>    |              |              | <b>-4292.879418</b>                |
| <b>Sum of electronic and thermal Free Energies=</b> |              |              | <b>-4293.076686</b>                |

#### A-TSe2

|    |              |              |              |
|----|--------------|--------------|--------------|
| 6  | -0.00000005  | -0.000000365 | -0.00000038  |
| 6  | 0.000000092  | -0.00000021  | 0.000000291  |
| 7  | 0.000000215  | 0.000000172  | 0.000000089  |
| 7  | 0.000000067  | -0.00000006  | -0.000000032 |
| 16 | -0.000000708 | -0.000000524 | 0.000000926  |
| 8  | -0.0000006   | -0.00000053  | 0.000000975  |
| 8  | -0.000000429 | -0.000000344 | 0.000000282  |
| 6  | -0.000000596 | -0.000000046 | 0.000000096  |
| 6  | -0.000000653 | -0.000000076 | 0.000000869  |
| 6  | -0.000000536 | 0.000000026  | 0.000001135  |
| 6  | 0.000000026  | 0.000000023  | 0.000001699  |
| 6  | -0.000000338 | -0.000000075 | 0.00000101   |
| 6  | 0.000000112  | -0.000000135 | 0.000000639  |
| 1  | -0.00000038  | -0.000000439 | 0.000001209  |
| 1  | -0.000000475 | -0.000000177 | 0.000001636  |
| 1  | 0.000000014  | 0.000000065  | 0.000001092  |
| 1  | -0.000000376 | -0.000000043 | 0.000000067  |
| 6  | -0.000000206 | 0.000000191  | 0.000001938  |
| 1  | -0.000000093 | 0.000000031  | 0.000001391  |
| 1  | -0.000000498 | 0.000000056  | 0.00000148   |
| 1  | -0.000000208 | 0.000000115  | 0.000001699  |
| 6  | -0.000000499 | -0.000000025 | 0.000000075  |
| 6  | -0.000000249 | -0.000000117 | 0.000000711  |

|    |              |              |              |
|----|--------------|--------------|--------------|
| 1  | -0.000000383 | -0.000000334 | 0.000000372  |
| 1  | 0.000000015  | 0.000000041  | 0.000000617  |
| 6  | -0.000000186 | 0.000000045  | 0.000001139  |
| 1  | -0.000000318 | 0.000000285  | 0.000000561  |
| 1  | -0.000000658 | -0.000000308 | 0.000001084  |
| 6  | -0.000000231 | 0.000000076  | 0.000001375  |
| 1  | -0.000000388 | -0.000000094 | 0.000000864  |
| 1  | -0.000000038 | 0.000000008  | 0.000000792  |
| 1  | -0.000000015 | 0.000000108  | 0.000001409  |
| 1  | -0.000000013 | 0.000000024  | 0.000001276  |
| 1  | -0.000000333 | -0.000000014 | 0.000001384  |
| 6  | 0.000000084  | 0.000000213  | 0.000000198  |
| 6  | 0.000000341  | 0.000000114  | 0.000000594  |
| 1  | 0.000000211  | 0.000000498  | 0.000000194  |
| 1  | 0.000000154  | 0.000000216  | 0.000000438  |
| 6  | 0.000000279  | 0.000000561  | 0.000000625  |
| 1  | 0.000000194  | 0.000000031  | 0.000000612  |
| 1  | 0.000000188  | 0.000000291  | 0.000000073  |
| 6  | 0.000000036  | 0.000000618  | 0.000001075  |
| 1  | 0.000000177  | 0.000000275  | 0.000000693  |
| 1  | 0.000000074  | 0.000000496  | 0.000000566  |
| 1  | 0.000000533  | 0.000000641  | 0.000001108  |
| 1  | 0.000000469  | 0.000000546  | 0.000001031  |
| 1  | 0.000000269  | 0.000000039  | 0.000001118  |
| 16 | 0.000000344  | 0.000000241  | 0.000000058  |
| 8  | 0.000000369  | 0.000000425  | 0.000000102  |
| 8  | 0.000000047  | -0.000000008 | 0.000000099  |
| 6  | 0.000000139  | 0.000000151  | -0.000000036 |
| 6  | 0.000000919  | 0.000000111  | -0.000000436 |
| 6  | 0.000000166  | 0.000000081  | -0.000000434 |
| 6  | 0.000000555  | 0.000000135  | -0.000000697 |
| 1  | 0.000000588  | 0.000000445  | -0.000000308 |
| 6  | 0.000000746  | -0.000000179 | -0.000000844 |
| 1  | -0.000000004 | -0.000000103 | -0.000000466 |
| 6  | -0.000000812 | 0.000001398  | -0.00000104  |
| 1  | 0.000000582  | 0.000000058  | -0.000000741 |
| 1  | -0.000000031 | -0.000000008 | -0.000000967 |
| 6  | 0.000000702  | -0.000000266 | -0.000001559 |
| 1  | 0.000000698  | 0.000000359  | -0.000001309 |
| 1  | 0.000000075  | -0.000000795 | -0.000001128 |
| 1  | 0.000001433  | 0.000000554  | -0.000001203 |
| 79 | 0.000000308  | 0.000000316  | 0.000000153  |
| 6  | 0.000000186  | -0.000000421 | -0.000000644 |
| 6  | 0.000000288  | 0.000000089  | -0.000000712 |

|   |              |              |              |
|---|--------------|--------------|--------------|
| 6 | 0.000000247  | 0.000000196  | -0.000000431 |
| 1 | 0.000000046  | 0.000000303  | -0.000000489 |
| 1 | 0.000000313  | 0.000000032  | -0.000000947 |
| 7 | 0.000000211  | -0.000000233 | -0.000000778 |
| 7 | 0.000000108  | 0.000000558  | -0.000000157 |
| 6 | -0.000000154 | -0.000000261 | -0.000000849 |
| 6 | -0.000000265 | -0.000000281 | -0.000000889 |
| 6 | 0.000000053  | -0.000000128 | -0.000000954 |
| 6 | -0.000000358 | -0.000000051 | -0.000001014 |
| 6 | -0.000000199 | -0.000000326 | -0.000001178 |
| 6 | -0.000000279 | -0.000000503 | -0.000001218 |
| 1 | -0.000000545 | -0.000000582 | -0.000001119 |
| 1 | -0.000000039 | -0.00000003  | -0.000001403 |
| 1 | -0.000000448 | -0.000000627 | -0.000001405 |
| 6 | 0.000000385  | 0.000000266  | 0.000000231  |
| 6 | 0.000000568  | 0.000000283  | 0.000000186  |
| 6 | -0.000000033 | 0.000000278  | -0.000000085 |
| 6 | 0.000000764  | 0.000000478  | 0.000000471  |
| 6 | 0.000000101  | 0.000000398  | 0.000000415  |
| 6 | 0.000000409  | 0.000000493  | 0.000000643  |
| 1 | 0.000000758  | 0.000000681  | 0.000000384  |
| 1 | 0.000000188  | 0.000000257  | 0.000000615  |
| 1 | 0.000000492  | 0.000000572  | 0.000000741  |
| 6 | 0.000000773  | 0.000000353  | 0.000000049  |
| 6 | 0.000000836  | 0.000000747  | -0.000000181 |
| 6 | 0.000000852  | 0.000000548  | -0.000000275 |
| 1 | 0.000000587  | 0.000000446  | -0.000000484 |
| 1 | 0.000000637  | 0.000000556  | -0.000000333 |
| 1 | 0.000001005  | 0.000000726  | -0.000000508 |
| 1 | 0.000000998  | 0.000000867  | -0.000000072 |
| 1 | 0.000000073  | 0.000000694  | -0.000000008 |
| 1 | 0.000000731  | 0.000000718  | 0.000000022  |
| 1 | 0.000000867  | 0.000000643  | -0.000000097 |
| 6 | 0.000000174  | -0.000000109 | 0.000000268  |
| 6 | -0.000000235 | -0.000000218 | 0.000000305  |
| 6 | 0.000000136  | 0.000000012  | 0.000000014  |
| 1 | -0.000000198 | 0.000000068  | 0.000000008  |
| 1 | -0.000000287 | -0.000000125 | 0.000000312  |
| 1 | -0.000000355 | -0.000000329 | 0.000000318  |
| 1 | -0.000000246 | -0.000000018 | 0.000000628  |
| 1 | 0.000000212  | 0.000000016  | -0.000000053 |
| 1 | 0.000000079  | 0.000000012  | 0.000000417  |
| 1 | -0.000000014 | -0.000000108 | 0.000000061  |
| 6 | 0.000000249  | -0.000000006 | -0.000000983 |

|    |              |              |              |
|----|--------------|--------------|--------------|
| 6  | 0.00000021   | 0.000000119  | -0.000000874 |
| 6  | 0.000000349  | 0.000000169  | -0.00000123  |
| 1  | 0.000000197  | 0.000000085  | -0.000000581 |
| 1  | -0.000000417 | -0.000000426 | -0.00000093  |
| 1  | 0.000000151  | 0.000000208  | -0.000000935 |
| 1  | 0.000000083  | -0.000000162 | -0.000001092 |
| 1  | 0.000000377  | 0.000000105  | -0.000001295 |
| 1  | 0.000000302  | 0.000000005  | -0.00000144  |
| 1  | 0.000000552  | 0.000000251  | -0.000001208 |
| 6  | -0.000000386 | -0.000000049 | -0.000000605 |
| 6  | -0.00000028  | -0.000000226 | -0.000000977 |
| 6  | -0.00000072  | -0.000000564 | -0.000000323 |
| 1  | -0.000000066 | -0.000000432 | -0.000000515 |
| 1  | -0.000000185 | -0.000000323 | -0.000000965 |
| 1  | -0.000000375 | -0.000000445 | -0.000000751 |
| 1  | -0.000000496 | -0.000000056 | -0.000000995 |
| 1  | -0.000000136 | -0.000000371 | -0.000000569 |
| 1  | -0.000000546 | -0.000000868 | -0.000000715 |
| 1  | -0.00000078  | -0.000000058 | -0.000000024 |
| 8  | -0.000000001 | -0.000000126 | -0.000000192 |
| 6  | -0.000000974 | -0.000000459 | 0.000000118  |
| 6  | -0.000000922 | -0.000000854 | 0.000000013  |
| 6  | -0.000001018 | -0.000000885 | -0.000000024 |
| 6  | -0.000001001 | -0.000000744 | -0.000000515 |
| 6  | -0.000000558 | -0.000000622 | -0.000000345 |
| 1  | -0.00000116  | -0.00000102  | -0.000000289 |
| 1  | -0.000000736 | -0.000000057 | 0.000000417  |
| 7  | -0.000000485 | -0.000000621 | -0.000000443 |
| 8  | -0.00000067  | -0.000000096 | 0.000000139  |
| 1  | -0.000000929 | -0.000000898 | -0.000000691 |
| 1  | -0.000001067 | -0.000000837 | 0.000000205  |
| 17 | -0.00000067  | -0.000000503 | -0.000000887 |

Zero-point correction=

1.189375 (Hartree/Particle)

Thermal correction to Energy=

1.266189

Thermal correction to Enthalpy=

1.267134

Thermal correction to Gibbs Free Energy=

1.067703

Sum of electronic and zero-point Energies=

-4292.932490

Sum of electronic and thermal Energies=

-4292.855676

Sum of electronic and thermal Enthalpies=

-4292.854731

Sum of electronic and thermal Free Energies=

-4293.054162

A-2e

|   |              |              |              |
|---|--------------|--------------|--------------|
| 6 | -0.000003836 | 0.000003993  | -0.000000419 |
| 6 | 0.000001212  | -0.000000473 | -0.000000517 |



|    |              |              |              |
|----|--------------|--------------|--------------|
| 7  | -0.000003048 | 0.000002758  | -0.00000327  |
| 7  | -0.000001424 | 0.000006786  | 0.000000835  |
| 16 | 0.000001953  | -0.000001353 | 0.000003437  |
| 8  | 0.000000749  | 0.000002629  | 0.000000501  |
| 8  | 0.000001165  | 0.000002425  | 0.000001611  |
| 6  | -0.000000354 | 0.000002431  | 0.000001024  |
| 6  | -0.000000856 | 0.000002834  | 0.000000433  |
| 6  | -0.000000107 | 0.000002954  | -0.000000581 |
| 6  | 0.000000285  | 0.000004336  | 0.000001644  |
| 6  | -0.000000428 | 0.000001455  | 0.000001481  |
| 6  | 0.000000525  | 0.000000929  | 0.000002201  |
| 1  | -0.000000569 | 0.000003038  | 0.00000013   |
| 1  | -0.000000955 | 0.000003509  | -0.000000182 |
| 1  | 0.000000377  | 0.000002364  | 0.000001541  |
| 1  | -0.000000455 | 0.000002706  | 0.000000684  |
| 6  | -0.000000567 | 0.000003502  | -0.000000268 |
| 1  | -0.000000253 | 0.000002732  | 0.00000103   |
| 1  | -0.000000131 | 0.000002854  | 0.000001252  |
| 1  | -0.000000327 | 0.000002654  | 0.000001184  |
| 6  | -0.000000855 | 0.000003693  | 0.000002084  |
| 6  | -0.000000518 | 0.000000872  | -0.000001555 |
| 1  | -0.000000616 | 0.000001044  | -0.000001491 |
| 1  | -0.000000658 | 0.000002015  | -0.000000942 |
| 6  | -0.000001223 | 0.000002628  | -0.000001791 |
| 1  | -0.000000987 | 0.000001048  | -0.000001324 |
| 1  | -0.000001099 | 0.000001935  | -0.000001037 |
| 6  | -0.00000164  | 0.000000856  | -0.000001939 |
| 1  | -0.000001234 | 0.000002473  | -0.000001495 |
| 1  | -0.000001337 | 0.000001795  | -0.000001822 |
| 1  | -0.000001891 | 0.00000216   | -0.000002599 |
| 1  | -0.000001044 | 0.000001237  | -0.000002275 |
| 1  | -0.000001338 | 0.000002191  | -0.000001682 |
| 6  | -0.000000873 | -0.000001982 | 0.000001034  |
| 6  | 0.000000896  | 0.000004244  | -0.000000303 |
| 1  | 0.000000125  | -0.000000736 | 0.000000725  |
| 1  | 0.000000164  | 0.000000527  | 0.000000391  |
| 6  | 0.00000043   | -0.000000702 | 0.000000149  |
| 1  | -0.000000019 | 0.00000009   | 0.000000532  |
| 1  | -0.000000374 | 0.000001119  | 0.000000348  |
| 6  | -0.000001076 | 0.000000848  | -0.000000528 |
| 1  | -0.000000683 | 0.000000889  | -0.000000326 |
| 1  | -0.000000018 | 0.000000208  | 0.000000011  |
| 1  | -0.000000416 | 0.000000489  | -0.000000943 |
| 1  | 0.000000222  | 0.000001107  | 0.00000002   |

|    |              |              |              |
|----|--------------|--------------|--------------|
| 1  | -0.000000701 | 0.000001128  | -0.000000381 |
| 16 | 0.000001458  | -0.000005755 | 0.000000271  |
| 8  | 0.000000048  | -0.000000292 | 0.000002841  |
| 8  | 0.000001441  | 0.000001305  | 0.000001894  |
| 6  | 0.000002799  | 0.000000561  | 0.000000919  |
| 6  | -0.000000464 | -0.000000992 | 0.000001959  |
| 6  | 0.000002408  | 0.000001768  | 0.000003609  |
| 6  | 0.000004198  | -0.000000974 | 0.000001312  |
| 1  | 0.000001347  | -0.000001414 | 0.000001358  |
| 6  | -0.000001359 | 0.000000003  | 0.000001011  |
| 1  | 0.000001245  | 0.000000045  | 0.000001729  |
| 6  | 0.000000884  | -0.000002323 | 0.000006164  |
| 1  | 0.000001348  | -0.000001893 | 0.000002073  |
| 1  | 0.000001724  | -0.000000224 | 0.000002617  |
| 6  | 0.000000923  | -0.000001528 | 0.000003643  |
| 1  | 0.000002727  | -0.000001138 | 0.00000147   |
| 1  | 0.000000873  | -0.000001564 | 0.000002791  |
| 1  | 0.000002942  | -0.000002434 | 0.00000312   |
| 79 | -0.000001272 | -0.000001817 | -0.000000943 |
| 6  | 0.000002356  | -0.000000087 | -0.000000456 |
| 6  | 0.000001843  | -0.000000735 | 0.000002803  |
| 6  | 0.000002862  | -0.000000811 | -0.000002905 |
| 1  | -0.000000876 | -0.00000246  | -0.00000075  |
| 1  | -0.000000054 | -0.000001906 | -0.000001709 |
| 7  | -0.000005518 | -0.000004631 | -0.00000206  |
| 7  | -0.00000091  | 0.000000055  | 0.000002223  |
| 6  | 0.000001452  | -0.000001014 | -0.00000089  |
| 6  | -0.000001142 | 0.000000139  | -0.00000123  |
| 6  | 0.000000523  | 0.000000469  | 0.00000224   |
| 6  | 0.000000474  | 0.000000365  | -0.000000106 |
| 6  | 0.000000604  | -0.000000059 | -0.000001427 |
| 6  | -0.000000366 | 0.00000125   | 0.000000823  |
| 1  | -0.000000789 | 0.000001186  | -0.000000308 |
| 1  | 0.000000029  | 0.000000934  | 0.00000169   |
| 1  | 0.000000114  | 0.000001151  | 0.000000534  |
| 6  | 0.000000092  | -0.000005031 | -0.000002826 |
| 6  | 0.00000117   | -0.000002421 | 0.000000779  |
| 6  | -0.000000526 | -0.000002    | -0.000002255 |
| 6  | -0.000000393 | -0.000002462 | -0.000000057 |
| 6  | -0.000000505 | -0.000000546 | -0.000001163 |
| 6  | 0.000000154  | -0.000002668 | -0.000001701 |
| 1  | 0.000000281  | -0.000002267 | -0.000001224 |
| 1  | -0.000000371 | -0.000002281 | -0.000001605 |
| 1  | -0.000000333 | -0.000002966 | -0.00000191  |

|   |              |              |              |
|---|--------------|--------------|--------------|
| 6 | -0.00000607  | -0.000001357 | -0.000001724 |
| 6 | 0.000000854  | -0.000003164 | 0.000000954  |
| 6 | 0.000000926  | -0.00000127  | 0.000000567  |
| 1 | -0.000000563 | -0.000001834 | -0.000000116 |
| 1 | 0.000000996  | -0.000003286 | 0.000000151  |
| 1 | 0.000001393  | -0.000003244 | 0.000000569  |
| 1 | 0.0000007    | -0.000003806 | -0.000000108 |
| 1 | 0.000001183  | -0.000001622 | 0.000001057  |
| 1 | 0.000000338  | -0.000001377 | 0.000000635  |
| 1 | 0.000001005  | -0.00000209  | 0.000001519  |
| 6 | 0.000000076  | -0.000001401 | -0.00000143  |
| 6 | -0.000000177 | -0.000000958 | -0.000002455 |
| 6 | -0.000000593 | -0.000002131 | -0.000001921 |
| 1 | -0.00000026  | -0.00000129  | -0.000001623 |
| 1 | -0.000001191 | -0.000000326 | -0.000001919 |
| 1 | -0.000001477 | -0.000000515 | -0.000002615 |
| 1 | -0.000001024 | -0.000000953 | -0.000002398 |
| 1 | -0.000001101 | -0.000001924 | -0.000002802 |
| 1 | -0.000000934 | -0.000001969 | -0.000003104 |
| 1 | -0.000001335 | -0.000001457 | -0.000003064 |
| 6 | 0.000001899  | -0.000001062 | 0.000001112  |
| 6 | -0.000001138 | -0.000000004 | 0.000000311  |
| 6 | 0.00000028   | -0.000001229 | 0.00000129   |
| 1 | -0.000000387 | -0.000000741 | 0.000000307  |
| 1 | 0.000001219  | -0.000000625 | 0.000001878  |
| 1 | 0.000001344  | -0.000000458 | 0.000001644  |
| 1 | 0.000001242  | 0.000000117  | 0.000002143  |
| 1 | 0.000000948  | -0.000001154 | 0.000000815  |
| 1 | 0.000000874  | -0.000000878 | 0.000001394  |
| 1 | 0.000001294  | -0.000001545 | 0.000001485  |
| 6 | -0.000000252 | 0.000001032  | -0.000001307 |
| 6 | -0.000000974 | 0.000000382  | -0.000001196 |
| 6 | -0.000001383 | 0.000000867  | -0.000001279 |
| 1 | 0.000000083  | -0.000000192 | -0.000000954 |
| 1 | -0.000000581 | -0.000000667 | -0.000001267 |
| 1 | -0.000001152 | -0.000000219 | -0.000002324 |
| 1 | -0.000000626 | -0.000000248 | -0.000001706 |
| 1 | -0.000000626 | 0.000000164  | -0.000001369 |
| 1 | -0.000000495 | 0.000001467  | -0.000001244 |
| 1 | -0.000001493 | 0.000000047  | -0.000002058 |
| 8 | 0.00000016   | -0.000000321 | 0.000002168  |
| 8 | 0.000001823  | 0.000001967  | -0.000001155 |

Zero-point correction=

1.111259 (Hartree/Particle)

Thermal correction to Energy=

1.182440

|                                              |              |
|----------------------------------------------|--------------|
| Thermal correction to Enthalpy=              | 1.183384     |
| Thermal correction to Gibbs Free Energy=     | 0.990603     |
| Sum of electronic and zero-point Energies=   | -3585.279817 |
| Sum of electronic and thermal Energies=      | -3585.208636 |
| Sum of electronic and thermal Enthalpies=    | -3585.207692 |
| Sum of electronic and thermal Free Energies= | -3585.400472 |

HNTf<sub>2</sub>

|    |              |              |              |
|----|--------------|--------------|--------------|
| 7  | 0.000006035  | 0.000006153  | 0.000009464  |
| 1  | 0.000001078  | -0.000003234 | 0.000002408  |
| 16 | -0.000023355 | -0.000003274 | -0.000010518 |
| 8  | 0.000003047  | -0.000002746 | 0.000001695  |
| 8  | 0.000011116  | -0.000000192 | 0.000005127  |
| 16 | 0.000000846  | 0.000003006  | 0.000004231  |
| 8  | -0.000002621 | -0.000000726 | -0.000000908 |
| 8  | -0.000006461 | -0.000000104 | -0.000007446 |
| 6  | 0.000038286  | -0.000002456 | 0.000028743  |
| 6  | 0.000015208  | 0.000019855  | -0.000043537 |
| 9  | -0.000012606 | -0.000008051 | 0.00000801   |
| 9  | 0.000003287  | -0.0000003   | 0.000001155  |
| 9  | -0.000008211 | -0.000001752 | -0.000002211 |
| 9  | -0.000016378 | -0.000008054 | 0.000011479  |
| 9  | -0.000007118 | 0.000006519  | -0.000002401 |
| 9  | -0.000002153 | -0.000004643 | -0.000005291 |

|                                              |                             |
|----------------------------------------------|-----------------------------|
| Zero-point correction=                       | 0.065377 (Hartree/Particle) |
| Thermal correction to Energy=                | 0.080488                    |
| Thermal correction to Enthalpy=              | 0.081432                    |
| Thermal correction to Gibbs Free Energy=     | 0.020644                    |
| Sum of electronic and zero-point Energies=   | -1827.637224                |
| Sum of electronic and thermal Energies=      | -1827.622113                |
| Sum of electronic and thermal Enthalpies=    | -1827.621169                |
| Sum of electronic and thermal Free Energies= | -1827.681958                |

NTf<sub>2</sub><sup>-</sup>

|    |              |              |              |
|----|--------------|--------------|--------------|
| 7  | 0.000000039  | -0.000000162 | 0.000074364  |
| 16 | -0.000027153 | 0.000039554  | -0.000054279 |
| 8  | 0.000000326  | -0.00000597  | -0.000022698 |
| 8  | -0.000020815 | -0.00002219  | 0.000036765  |
| 16 | 0.000027134  | -0.000039407 | -0.000054264 |
| 8  | -0.000000335 | 0.000005953  | -0.000022722 |
| 8  | 0.000020831  | 0.000022223  | 0.00003683   |
| 6  | 0.000021946  | -0.000021148 | 0.00001131   |
| 6  | -0.000021893 | 0.000021203  | 0.000011417  |

|                                              |              |              |                             |
|----------------------------------------------|--------------|--------------|-----------------------------|
| 9                                            | -0.00003851  | 0.000015353  | 0.00000449                  |
| 9                                            | -0.00003214  | 0.000011087  | -0.000003153                |
| 9                                            | 0.000007389  | 0.000030193  | -0.000009656                |
| 9                                            | -0.000007397 | -0.000030227 | -0.000009717                |
| 9                                            | 0.000003831  | -0.000015356 | 0.000004447                 |
| 9                                            | 0.000003162  | -0.000011105 | -0.000003134                |
| Zero-point correction=                       |              |              | 0.053382 (Hartree/Particle) |
| Thermal correction to Energy=                |              |              | 0.067855                    |
| Thermal correction to Enthalpy=              |              |              | 0.068799                    |
| Thermal correction to Gibbs Free Energy=     |              |              | 0.009216                    |
| Sum of electronic and zero-point Energies=   |              |              | -1827.151939                |
| Sum of electronic and thermal Energies=      |              |              | -1827.137466                |
| Sum of electronic and thermal Enthalpies=    |              |              | -1827.136522                |
| Sum of electronic and thermal Free Energies= |              |              | -1827.196105                |

## Z

|                                              |              |              |                             |
|----------------------------------------------|--------------|--------------|-----------------------------|
| 6                                            | -0.000387838 | -0.000249468 | -0.000000171                |
| 6                                            | 0.000140512  | 0.000232751  | 0.000000041                 |
| 6                                            | 0.000104199  | -0.000133738 | -0.000000007                |
| 6                                            | -0.000081243 | 0.00001012   | -0.000000092                |
| 6                                            | -0.000124566 | 0.000007488  | 0.000000376                 |
| 1                                            | -0.000003528 | 0.000020037  | 0.000000008                 |
| 1                                            | 0.000069919  | 0.000031794  | 0.000000003                 |
| 7                                            | 0.000254713  | 0.000078032  | -0.000000065                |
| 1                                            | 0.000044026  | -0.000004796 | -0.000000022                |
| 1                                            | -0.000014998 | -0.000015903 | 0.000000013                 |
| 17                                           | -0.000001197 | 0.000023685  | -0.000000112                |
| Zero-point correction=                       |              |              | 0.079241 (Hartree/Particle) |
| Thermal correction to Energy=                |              |              | 0.084604                    |
| Thermal correction to Enthalpy=              |              |              | 0.085548                    |
| Thermal correction to Gibbs Free Energy=     |              |              | 0.049523                    |
| Sum of electronic and zero-point Energies=   |              |              | -707.810087                 |
| Sum of electronic and thermal Energies=      |              |              | -707.804724                 |
| Sum of electronic and thermal Enthalpies=    |              |              | -707.803780                 |
| Sum of electronic and thermal Free Energies= |              |              | -707.839805                 |

## B-1

|    |              |              |              |
|----|--------------|--------------|--------------|
| 6  | 0.000008409  | -0.000007879 | -0.000001692 |
| 6  | -0.000001477 | 0.000004222  | -0.000000838 |
| 7  | -0.000003135 | 0.000001361  | 0.000009967  |
| 7  | -0.000001848 | 0.000001334  | -0.000000844 |
| 16 | -0.000000859 | -0.000000995 | -0.000002024 |
| 8  | -0.000000584 | 0.000001217  | -0.000001528 |

|    |              |              |              |
|----|--------------|--------------|--------------|
| 8  | 0.00000268   | -0.00000145  | -0.000002154 |
| 6  | 0.000002206  | -0.00000046  | 0.000002816  |
| 6  | -0.000000396 | -0.000000591 | -0.000000124 |
| 6  | -0.000000993 | 0.000000181  | -0.000000438 |
| 6  | -0.000001002 | 0.000000384  | -0.000000625 |
| 6  | -0.000001265 | -0.000000177 | 0.000000067  |
| 6  | -0.000001834 | 0.000000985  | -0.000002184 |
| 1  | -0.00000034  | -0.000000155 | -0.000000549 |
| 1  | -0.000000995 | -0.000000323 | -0.000000695 |
| 1  | -0.000000773 | -0.000000138 | -0.000000287 |
| 1  | 0.000000446  | 0.000000308  | 0.000000101  |
| 6  | -0.000001322 | 0.000000036  | -0.000000935 |
| 1  | -0.000001261 | -0.000000085 | -0.000000555 |
| 1  | -0.000001712 | -0.000000294 | -0.000000601 |
| 1  | -0.00000018  | -0.000000131 | -0.000000007 |
| 6  | 0.000004161  | -0.000002386 | -0.000003323 |
| 6  | -0.000001051 | -0.000000829 | 0.000000763  |
| 1  | -0.000000431 | 0.000002035  | 0.000000249  |
| 1  | -0.000000751 | 0.000000266  | 0.000000743  |
| 6  | 0.000001961  | -0.000002368 | 0.000001411  |
| 1  | 0.000000947  | 0.000000452  | 0.000000969  |
| 1  | 0.000000846  | 0.000000031  | 0.000000292  |
| 6  | 0.000000481  | -0.000000213 | 0.000001375  |
| 1  | 0.000000389  | -0.000000151 | 0.000001038  |
| 1  | -0.000001184 | 0.000001165  | 0.000000926  |
| 1  | 0.000000527  | -0.000000508 | 0.00000158   |
| 1  | 0.000000879  | -0.000000209 | 0.000001246  |
| 1  | 0.000000988  | -0.000000178 | 0.000000944  |
| 6  | 0.000001237  | -0.000000894 | 0.000001539  |
| 6  | 0.000000803  | 0.000001358  | 0.000000991  |
| 1  | 0.000001361  | 0.000000199  | -0.000000124 |
| 1  | -0.000000028 | 0.000000368  | -0.000000982 |
| 6  | 0.000000648  | 0.000000013  | -0.000000033 |
| 1  | 0.000001094  | -0.000000336 | -0.000000016 |
| 1  | 0.000000238  | 0.000000014  | -0.000000064 |
| 6  | 0.000000774  | -0.000000221 | 0.000000141  |
| 1  | 0.000000955  | 0.000000012  | -0.000000153 |
| 1  | 0.000001144  | 0.000000269  | -0.000000176 |
| 1  | 0.000001198  | 0.000000213  | 0.000000212  |
| 1  | 0.000001123  | 0.000000018  | 0.000000312  |
| 1  | 0.000000807  | 0.000000091  | 0.000000032  |
| 16 | -0.000001335 | -0.000001105 | 0.000000264  |
| 8  | 0.000000388  | 0.000000216  | -0.000001503 |
| 8  | 0.000000091  | 0.000001496  | 0.000000015  |

|    |              |               |              |
|----|--------------|---------------|--------------|
| 6  | -0.000000709 | 0.000000427   | -0.000001272 |
| 6  | -0.000000728 | -0.000000146  | -0.000001044 |
| 6  | -0.000000201 | 0.000000909   | -0.000001643 |
| 6  | 0.00000014   | 0.000000744   | -0.000001588 |
| 1  | 0.00000007   | 0.000000675   | -0.000000792 |
| 6  | -0.000000375 | -0.000000096  | -0.000001289 |
| 1  | -0.000000115 | 0.000000083   | -0.000000897 |
| 6  | 0.000000304  | 0.0000004     | -0.000001618 |
| 1  | -0.000000058 | 0.000000716   | -0.000001401 |
| 1  | -0.000000187 | 0.000000606   | -0.000001543 |
| 6  | 0.000000107  | 0.000000616   | -0.000002341 |
| 1  | -0.000000074 | 0.000000847   | -0.000002229 |
| 1  | -0.000000381 | 0.000000988   | -0.000001822 |
| 1  | 0.000000227  | 0.000000583   | -0.000001787 |
| 7  | 0.0000009303 | -0.0000004498 | 0.0000005363 |
| 1  | -0.00001309  | 0.000002848   | -0.000003599 |
| 16 | -0.00000308  | -0.000001811  | -0.000001741 |
| 8  | 0.000000302  | 0.000000369   | 0.000002808  |
| 8  | -0.000000351 | -0.000000096  | 0.000000384  |
| 16 | 0.000001442  | -0.000001874  | 0.000001526  |
| 8  | 0.00000121   | 0.000000095   | 0.000001101  |
| 8  | -0.000002616 | -0.000000225  | -0.000001224 |
| 6  | -0.000003542 | -0.000003218  | 0.000002815  |
| 6  | 0.00000532   | 0.000004907   | 0.00000497   |
| 9  | 0.000001788  | 0.000000507   | 0.000001015  |
| 9  | -0.000000767 | 0.000000359   | -0.000000556 |
| 9  | -0.000000414 | 0.000001795   | 0.000000955  |
| 9  | 0.000000206  | -0.000001808  | 0.000001621  |
| 9  | -0.000001625 | -0.000001071  | -0.00000019  |
| 9  | -0.000000665 | -0.000001777  | 0.000000193  |

Zero-point correction= 0.592886 (Hartree/Particle)

Thermal correction to Energy= 0.645014

Thermal correction to Enthalpy= 0.645958

Thermal correction to Gibbs Free Energy= 0.495457

Sum of electronic and zero-point Energies= -3967.588321

Sum of electronic and thermal Energies= -3967.536194

Sum of electronic and thermal Enthalpies= -3967.535249

Sum of electronic and thermal Free Energies= -3967.685750

#### B-TS1

|   |              |              |              |
|---|--------------|--------------|--------------|
| 6 | -0.000000376 | 0.000000938  | -0.000000149 |
| 6 | 0.000000761  | 0.000001498  | -0.000000065 |
| 7 | 0.000000307  | -0.000000053 | 0.000000974  |
| 7 | -0.000000603 | -0.000000852 | -0.000000679 |

|    |              |              |              |
|----|--------------|--------------|--------------|
| 16 | 0.000000428  | 0.000000838  | 0.000001041  |
| 8  | 0.000000025  | 0.000000828  | 0.000000576  |
| 8  | 0.000000018  | 0.000001018  | 0.000001723  |
| 6  | 0.000000224  | 0.000001043  | 0.00000081   |
| 6  | -0.000000071 | -0.00000028  | 0.000002427  |
| 6  | 0.000000675  | -0.000001868 | 0.000001828  |
| 6  | 0.000000115  | 0.000001109  | 0.000000766  |
| 6  | 0.00000007   | -0.000000542 | 0.000003332  |
| 6  | 0.000000806  | -0.000000961 | 0.000001765  |
| 1  | 0.000000054  | -0.000000567 | 0.000000898  |
| 1  | 0.000000192  | -0.000001542 | 0.000001763  |
| 1  | 0.000000366  | -0.000000304 | 0.000003306  |
| 1  | 0.000000208  | 0.000000589  | 0.000002549  |
| 6  | 0.000000228  | -0.000001256 | 0.000002936  |
| 1  | 0.000000889  | -0.000001541 | 0.00000347   |
| 1  | 0.000000575  | -0.000001623 | 0.000003053  |
| 1  | 0.000000422  | -0.000001994 | 0.000003445  |
| 6  | -0.000000121 | 0.000000063  | 0.000001434  |
| 6  | 0.000000119  | 0.000000642  | 0.000001057  |
| 1  | 0.000000071  | -0.000000236 | 0.000000864  |
| 1  | 0.000000294  | -0.000000003 | 0.000001631  |
| 6  | 0.000000133  | 0.000000605  | 0.000001557  |
| 1  | 0.000000032  | 0.000000912  | 0.000000616  |
| 1  | 0.000000141  | 0.000001122  | 0.000001352  |
| 6  | 0.000000126  | 0.000001123  | 0.00000146   |
| 1  | 0.000000244  | 0.000000428  | 0.000001974  |
| 1  | 0.000000164  | 0.000000146  | 0.000001247  |
| 1  | 0.000000163  | 0.000000995  | 0.000001734  |
| 1  | 0.000000046  | 0.000001226  | 0.000000954  |
| 1  | 0.000000145  | 0.000001576  | 0.000001667  |
| 6  | -0.000000059 | 0.000000342  | -0.000001439 |
| 6  | -0.000000283 | 0.000000293  | -0.000001981 |
| 1  | -0.0000002   | 0.000001181  | -0.000001358 |
| 1  | -0.000000425 | 0.000000572  | -0.000001566 |
| 6  | -0.000000393 | 0.000000875  | -0.000002445 |
| 1  | -0.000000134 | 0.000000369  | -0.00000173  |
| 1  | -0.00000028  | -0.000000153 | -0.000002003 |
| 6  | -0.000000412 | 0.000000608  | -0.000003023 |
| 1  | -0.00000045  | 0.000000857  | -0.000002686 |
| 1  | -0.000000375 | 0.00000137   | -0.000002357 |
| 1  | -0.000000503 | 0.000000975  | -0.000003417 |
| 1  | -0.00000038  | 0.000000641  | -0.000002822 |
| 1  | -0.000000432 | 0.000000153  | -0.000003178 |
| 16 | -0.000000161 | 0.000000339  | -0.000000459 |



|    |              |              |              |
|----|--------------|--------------|--------------|
| 8  | 0.000000105  | -0.000000898 | -0.000000319 |
| 8  | -0.000000024 | -0.000001403 | -0.000001317 |
| 6  | -0.000000007 | -0.000000669 | -0.000000727 |
| 6  | -0.000000161 | 0.000000576  | -0.000000866 |
| 6  | -0.000000307 | -0.000000325 | -0.00000185  |
| 6  | 0.000000235  | 0.000000884  | -0.000000877 |
| 1  | 0.000000034  | 0.000000444  | 0.000000066  |
| 6  | -0.000000715 | 0.000000139  | -0.000001724 |
| 1  | -0.000000178 | -0.000000463 | -0.00000177  |
| 6  | -0.000000678 | -0.000000126 | -0.000000004 |
| 1  | -0.000000225 | 0.000001153  | 0.000000119  |
| 1  | -0.000000234 | 0.000000299  | -0.000001835 |
| 6  | -0.000000252 | 0.000000601  | -0.000000006 |
| 1  | -0.000000052 | 0.000000396  | -0.000001791 |
| 1  | 0.000000322  | 0.000001016  | -0.000000699 |
| 1  | -0.000000051 | 0.000001202  | -0.000001556 |
| 7  | 0.000000139  | -0.000000501 | -0.000000224 |
| 1  | -0.000000097 | -0.000000465 | -0.000000139 |
| 16 | -0.000000306 | -0.000001145 | -0.000000129 |
| 8  | 0.000000093  | -0.000001697 | -0.000000072 |
| 8  | 0.000000398  | -0.000001646 | 0.000000059  |
| 16 | -0.000000112 | -0.000000287 | -0.000000604 |
| 8  | -0.000000117 | -0.000000842 | -0.000001332 |
| 8  | -0.000000205 | 0.000000285  | -0.000001222 |
| 6  | -0.000000063 | -0.000001902 | -0.000000774 |
| 6  | 0.000000085  | 0.000000014  | -0.000000148 |
| 9  | 0.000000137  | -0.000001588 | -0.000000513 |
| 9  | 0.000000105  | -0.000002418 | -0.000000253 |
| 9  | 0.000000012  | -0.000001818 | -0.000001142 |
| 9  | -0.000000006 | -0.000000556 | 0.000000003  |
| 9  | -0.000000126 | 0.000000584  | -0.000000268 |
| 9  | -0.000000081 | 0.000000007  | -0.000000828 |

|                                              |                             |
|----------------------------------------------|-----------------------------|
| Zero-point correction=                       | 0.588837 (Hartree/Particle) |
| Thermal correction to Energy=                | 0.640333                    |
| Thermal correction to Enthalpy=              | 0.641278                    |
| Thermal correction to Gibbs Free Energy=     | 0.493126                    |
| Sum of electronic and zero-point Energies=   | -3967.588785                |
| Sum of electronic and thermal Energies=      | -3967.537288                |
| Sum of electronic and thermal Enthalpies=    | -3967.536344                |
| Sum of electronic and thermal Free Energies= | -3967.684496                |

B-2

|   |              |              |              |
|---|--------------|--------------|--------------|
| 6 | -0.000010747 | -0.000009718 | -0.000013049 |
| 6 | 0.000011402  | 0.000016089  | 0.000004305  |

|    |              |              |              |
|----|--------------|--------------|--------------|
| 7  | -0.000001734 | -0.000000426 | 0.000017991  |
| 7  | 0.000000319  | -0.000004251 | -0.000005749 |
| 16 | -0.000002832 | 0.00000222   | -0.000007956 |
| 8  | 0.000000975  | -0.000001527 | -0.000001107 |
| 8  | -0.00000381  | -0.000000763 | -0.000002319 |
| 6  | 0.00000503   | -0.000001688 | 0.000006217  |
| 6  | 0.000001545  | 0.000002287  | -0.000000567 |
| 6  | 0.000002101  | 0.000000368  | 0.000004381  |
| 6  | 0.000002184  | -0.000001734 | 0.000003184  |
| 6  | -0.000000425 | -0.000001658 | 0.000001454  |
| 6  | -0.00000303  | 0.000000852  | 0.000002242  |
| 1  | 0.00000119   | -0.000000429 | -0.000000265 |
| 1  | 0.000002664  | -0.000001265 | 0.00000249   |
| 1  | 0.000000716  | 0.000000199  | 0.000003975  |
| 1  | -0.000000006 | 0.000000477  | 0.000002653  |
| 6  | 0.000004035  | -0.000001032 | 0.000004221  |
| 1  | 0.000002441  | -0.000000648 | 0.000004705  |
| 1  | 0.000000865  | -0.000000071 | 0.000003318  |
| 1  | 0.000001343  | -0.000002732 | 0.000003731  |
| 6  | 0.000004592  | 0.000002821  | -0.000006439 |
| 6  | -0.000002865 | -0.000000165 | -0.000001327 |
| 1  | -0.000000469 | -0.000001219 | -0.000001694 |
| 1  | -0.000000264 | 0.000000121  | 0.000001004  |
| 6  | 0.000000392  | 0.000000088  | -0.000001905 |
| 1  | -0.000000601 | 0.000000987  | -0.000002217 |
| 1  | 0.000000012  | 0.000000686  | -0.000001383 |
| 6  | -0.000002104 | 0.000000728  | -0.000001952 |
| 1  | -0.000000861 | 0.000000327  | -0.000001189 |
| 1  | -0.000000132 | -0.000000311 | -0.000002321 |
| 1  | -0.000001333 | 0.000000922  | -0.000002806 |
| 1  | -0.000001576 | 0.000000804  | -0.000003246 |
| 1  | -0.00000204  | 0.00000124   | -0.000002635 |
| 6  | -0.000002115 | -0.000002441 | -0.000001872 |
| 6  | -0.000000172 | 0.000002021  | -0.00000101  |
| 1  | 0.000000457  | 0.000000885  | -0.000000844 |
| 1  | -0.000002754 | -0.000000393 | -0.000001558 |
| 6  | -0.000002225 | 0.000000961  | -0.000003401 |
| 1  | -0.000000611 | 0.000000099  | -0.000002517 |
| 1  | 0.000000804  | -0.000000127 | -0.000003602 |
| 6  | -0.00000138  | 0.000000012  | -0.000004299 |
| 1  | -0.00000142  | 0.000000288  | -0.000002826 |
| 1  | -0.000001713 | 0.000001332  | -0.000002868 |
| 1  | -0.000001816 | 0.000001014  | -0.000004777 |
| 1  | -0.000001061 | 0.000000528  | -0.000004229 |

|    |              |              |              |
|----|--------------|--------------|--------------|
| 1  | -0.00000485  | 0.00000457   | -0.000004357 |
| 16 | 0.000001641  | 0.000004309  | 0.000013052  |
| 8  | 0.000000788  | -0.00000473  | -0.000003764 |
| 8  | 0.000002368  | -0.000003463 | -0.00000066  |
| 6  | -0.000004209 | -0.00000006  | -0.000004125 |
| 6  | 0.000000164  | -0.000002585 | 0.000002124  |
| 6  | 0.000002983  | -0.000000095 | 0.000003396  |
| 6  | -0.000000315 | 0.000001185  | 0.000000443  |
| 1  | 0.000000452  | 0.00000003   | 0.00000154   |
| 6  | -0.000001738 | 0.000002497  | 0.000001285  |
| 1  | 0.000001052  | -0.000000942 | -0.000001595 |
| 6  | 0.000001148  | -0.000002505 | 0.000004722  |
| 1  | 0.00000004   | 0.000000131  | 0.000002343  |
| 1  | 0.000000327  | -0.000000284 | 0.000001474  |
| 6  | -0.000000068 | -0.000000948 | 0.000001332  |
| 1  | 0.000000278  | -0.000000137 | 0.000002546  |
| 1  | -0.000000497 | 0.000000393  | 0.000005445  |
| 1  | -0.00000015  | 0.000002443  | 0.000003292  |
| 1  | 0.000004651  | -0.000001605 | -0.000000437 |

Zero-point correction=

0.538577 (Hartree/Particle)

Thermal correction to Energy=

0.573353

Thermal correction to Enthalpy=

0.574298

Thermal correction to Gibbs Free Energy=

0.466981

Sum of electronic and zero-point Energies=

-2140.330383

Sum of electronic and thermal Energies=

-2140.295607

Sum of electronic and thermal Enthalpies=

-2140.294663

Sum of electronic and thermal Free Energies=

-2140.401979

B-TSa11

|    |              |              |              |
|----|--------------|--------------|--------------|
| 6  | -0.000000346 | 0.000003602  | 0.000000444  |
| 6  | -0.000003313 | -0.000001408 | -0.000001773 |
| 7  | 0.00000161   | -0.000000026 | -0.000001049 |
| 7  | 0.000003327  | 0.000000091  | 0.000000359  |
| 16 | -0.000001728 | -0.000000137 | 0.000000194  |
| 8  | -0.000000781 | 0.000000842  | 0.000001357  |
| 8  | -0.00000112  | 0.000000557  | 0.00000158   |
| 6  | -0.000000335 | -0.000000226 | 0.000001616  |
| 6  | -0.000000365 | -0.000000422 | 0.000001509  |
| 6  | -0.000000257 | -0.000000649 | 0.000001725  |
| 6  | -0.000000369 | -0.000000642 | 0.000001669  |
| 6  | -0.000000205 | 0.000000689  | 0.000002609  |
| 6  | 0.000000011  | 0.000000679  | 0.000001445  |
| 1  | 0.00000006   | -0.000000483 | 0.000001273  |
| 1  | -0.000000117 | -0.000000723 | 0.000002051  |

|    |              |              |              |
|----|--------------|--------------|--------------|
| 1  | -0.000000674 | 0.000000257  | 0.000002372  |
| 1  | -0.000000784 | 0.000000551  | 0.000001552  |
| 6  | -0.000000724 | 0.000000257  | 0.000001673  |
| 1  | -0.00000022  | -0.000000323 | 0.000003195  |
| 1  | -0.000000639 | -0.000000236 | 0.000003346  |
| 1  | -0.000000122 | -0.000000671 | 0.00000282   |
| 6  | 0.000000403  | 0.000000562  | 0.000001119  |
| 6  | -0.000001023 | 0.000000018  | 0.000000755  |
| 1  | -0.00000007  | 0.000000053  | 0.00000071   |
| 1  | -0.00000021  | -0.000000042 | 0.000000704  |
| 6  | -0.000000316 | 0.000000448  | 0.000000358  |
| 1  | -0.000000619 | 0.000000246  | -0.000000023 |
| 1  | -0.000001087 | 0.000001183  | 0.000000354  |
| 6  | -0.000000524 | 0.000000623  | 0.000000333  |
| 1  | -0.000000326 | 0.000000335  | 0.000000558  |
| 1  | -0.000000265 | 0.000000433  | 0.000000566  |
| 1  | -0.000000485 | 0.000000715  | 0.000000274  |
| 1  | -0.000000373 | 0.000000602  | -0.000000132 |
| 1  | -0.000000747 | 0.000000902  | 0.000000024  |
| 6  | 0.000000585  | 0.000000334  | -0.000000238 |
| 6  | -0.00000007  | -0.000000942 | -0.000000752 |
| 1  | 0.000000382  | -0.000000267 | 0.00000012   |
| 1  | 0.000000489  | -0.00000041  | -0.000000733 |
| 6  | 0.000000271  | 0.000000242  | 0.000000317  |
| 1  | 0.000000103  | -0.000000127 | -0.000000225 |
| 1  | -0.000000112 | -0.000000279 | -0.00000077  |
| 6  | 0.000000031  | -0.000000272 | -0.000000161 |
| 1  | 0.000000523  | -0.000000588 | -0.000000546 |
| 1  | 0.000000336  | -0.000000633 | 0.000000246  |
| 1  | 0.00000019   | -0.00000025  | -0.000000084 |
| 1  | -0.000000179 | 0.000000235  | 0.000000062  |
| 1  | -0.000000006 | -0.000000034 | -0.000000416 |
| 16 | -0.000000343 | 0.000000179  | -0.000001958 |
| 8  | -0.000000282 | 0.000000085  | -0.000000766 |
| 8  | 0.000000031  | 0.000000442  | -0.000001141 |
| 6  | 0.000001594  | -0.00000095  | -0.00000115  |
| 6  | 0.00000068   | -0.000000438 | -0.000000886 |
| 6  | 0.00000042   | -0.000000234 | -0.00000156  |
| 6  | 0.000000602  | -0.000001058 | -0.000001188 |
| 1  | 0.000000587  | -0.000000821 | -0.000001276 |
| 6  | 0.000000904  | -0.000000904 | -0.000001678 |
| 1  | 0.000000352  | -0.000000273 | -0.000001436 |
| 6  | 0.000001954  | -0.000004359 | -0.000002827 |
| 1  | 0.000001192  | -0.00000143  | -0.000001468 |

|    |              |              |              |
|----|--------------|--------------|--------------|
| 1  | 0.000000968  | -0.000000971 | -0.000001829 |
| 6  | 0.000001767  | 0.000000966  | -0.000001222 |
| 1  | 0.000001309  | -0.000001971 | -0.000000714 |
| 1  | 0.000001484  | -0.000001469 | -0.000001058 |
| 1  | 0.000000531  | -0.000000494 | -0.000004229 |
| 1  | 0.000000127  | -0.000000352 | 0.000000418  |
| 6  | -0.000000371 | 0.000000668  | -0.000000768 |
| 6  | -0.000000056 | 0.000001138  | -0.000000022 |
| 6  | -0.000000853 | 0.000000652  | -0.000001011 |
| 6  | -0.000000265 | 0.000001696  | -0.000000901 |
| 6  | 0.000000038  | 0.000000915  | -0.000000548 |
| 1  | -0.000000922 | 0.000001629  | -0.000000892 |
| 1  | -0.000000826 | 0.000000991  | 0.000000044  |
| 7  | -0.000000586 | -0.000000517 | -0.000002327 |
| 8  | 0.000001158  | -0.000003199 | 0.000003357  |
| 1  | -0.000000762 | 0.000001682  | -0.000001119 |
| 1  | -0.000000631 | 0.000001356  | -0.000000366 |
| 17 | 0.000000089  | 0.000002376  | -0.000002063 |

|                                              |                             |
|----------------------------------------------|-----------------------------|
| Zero-point correction=                       | 0.622978 (Hartree/Particle) |
| Thermal correction to Energy=                | 0.665825                    |
| Thermal correction to Enthalpy=              | 0.666769                    |
| Thermal correction to Gibbs Free Energy=     | 0.539500                    |
| Sum of electronic and zero-point Energies=   | -2923.289936                |
| Sum of electronic and thermal Energies=      | -2923.247089                |
| Sum of electronic and thermal Enthalpies=    | -2923.246145                |
| Sum of electronic and thermal Free Energies= | -2923.373414                |

#### B-11a

|    |              |              |              |
|----|--------------|--------------|--------------|
| 6  | -0.000001362 | 0.000000101  | -0.000000208 |
| 6  | -0.000001033 | 0.000000504  | -0.000000613 |
| 7  | 0.000001846  | -0.000000481 | -0.000000843 |
| 7  | 0.000002258  | -0.000001603 | -0.000000136 |
| 16 | -0.000000267 | 0.000001251  | 0.000002642  |
| 8  | 0.000000018  | 0.000000345  | 0.000000304  |
| 8  | -0.000000025 | 0.000000451  | 0.000002359  |
| 6  | 0.000000912  | 0.000000262  | 0.000002058  |
| 6  | 0.000000103  | 0.000000482  | 0.000000752  |
| 6  | 0.000000195  | 0.000000028  | 0.000000345  |
| 6  | 0.000000774  | 0.000000265  | 0.000001894  |
| 6  | -0.000000125 | 0.000000051  | 0.000001821  |
| 6  | -0.000000682 | 0.000000162  | 0.000002081  |
| 1  | 0.000000544  | 0.000000567  | 0.000000393  |
| 1  | 0.000000233  | 0.000000286  | 0.000000822  |
| 1  | -0.000000535 | -0.000000089 | 0.000000311  |

|    |              |              |              |
|----|--------------|--------------|--------------|
| 1  | -0.00000448  | 0.00000172   | 0.000002686  |
| 6  | -0.00000404  | -0.00000812  | 0.00000376   |
| 1  | 0.00000217   | 0.00000246   | 0.000000782  |
| 1  | -0.00000432  | 0.00000111   | 0.000001793  |
| 1  | 0.00000269   | 0.000000875  | 0.000001141  |
| 6  | -0.00000762  | -0.00000125  | 0.000001224  |
| 6  | -0.00001268  | -0.000000861 | 0.000000626  |
| 1  | -0.00001077  | -0.000000902 | 0.000000195  |
| 1  | -0.00000725  | -0.000000641 | 0.000001198  |
| 6  | -0.00000169  | -0.000001571 | 0.000001822  |
| 1  | -0.000001018 | -0.000000981 | 0.000000944  |
| 1  | -0.000000987 | -0.000000804 | 0.000001875  |
| 6  | -0.000002085 | -0.000002023 | 0.000001738  |
| 1  | -0.000001781 | -0.000001479 | 0.000001716  |
| 1  | -0.000001934 | -0.000001833 | 0.000000089  |
| 1  | -0.000002486 | -0.000002277 | 0.000001941  |
| 1  | -0.000002027 | -0.000001968 | 0.000001376  |
| 1  | -0.000001948 | -0.000001533 | 0.000002351  |
| 6  | 0.000000667  | 0.000000752  | -0.00000209  |
| 6  | 0.000000981  | 0.000000721  | -0.00000228  |
| 1  | 0.000000774  | 0.000000313  | -0.000001211 |
| 1  | 0.000000488  | 0.000000106  | -0.00000178  |
| 6  | 0.000001597  | 0.000001264  | -0.000002141 |
| 1  | 0.000001584  | 0.000001183  | -0.000001152 |
| 1  | 0.000001223  | 0.000001075  | -0.000001852 |
| 6  | 0.000002097  | 0.000001669  | -0.000002806 |
| 1  | 0.000001277  | 0.000000698  | -0.000002898 |
| 1  | 0.000001461  | 0.000001066  | -0.000002303 |
| 1  | 0.000002229  | 0.000001716  | -0.000003218 |
| 1  | 0.000002392  | 0.000002058  | -0.000002341 |
| 1  | 0.00000217   | 0.000001697  | -0.000002936 |
| 16 | 0.000001675  | 0.000001308  | -0.000000006 |
| 8  | -0.000000332 | 0.000000635  | -0.000000733 |
| 8  | -0.000001267 | -0.00000014  | -0.000002479 |
| 6  | -0.000000224 | -0.000000299 | -0.000001085 |
| 6  | -0.00000094  | -0.000001222 | -0.000000812 |
| 6  | -0.000000732 | -0.000001411 | -0.000001567 |
| 6  | -0.000001381 | -0.000001795 | -0.000000541 |
| 1  | -0.000000696 | -0.00000076  | 0.000000009  |
| 6  | -0.000001088 | -0.000001519 | -0.000002604 |
| 1  | -0.000000069 | -0.000000593 | -0.000002617 |
| 6  | -0.000001256 | -0.000001408 | -0.000001386 |
| 1  | -0.000001728 | -0.000001868 | -0.000000387 |
| 1  | -0.000001083 | -0.000001724 | -0.000002697 |

|    |              |              |              |
|----|--------------|--------------|--------------|
| 6  | -0.000002023 | -0.000002548 | -0.000001712 |
| 1  | -0.000002322 | -0.000002685 | -0.000001209 |
| 1  | -0.000002031 | -0.000002646 | -0.000002184 |
| 1  | -0.000002169 | -0.00000273  | -0.00000195  |
| 1  | -0.00000013  | -0.000000489 | -0.000000333 |
| 6  | 0.000001254  | 0.00000139   | 0.000000059  |
| 6  | 0.000001597  | 0.000002859  | -0.000000204 |
| 6  | 0.00000223   | 0.000001694  | 0.000000835  |
| 6  | 0.000000937  | 0.000001483  | 0.000001583  |
| 6  | 0.000000759  | 0.000002685  | 0.000000077  |
| 1  | 0.000002103  | 0.000002504  | 0.000000983  |
| 1  | 0.000001476  | 0.000001196  | 0.000000584  |
| 7  | 0.00000098   | 0.000000196  | 0.000001273  |
| 8  | 0.000001296  | 0.000000605  | -0.000000016 |
| 1  | 0.000001478  | 0.000001589  | 0.00000132   |
| 1  | 0.000002215  | 0.000002306  | 0.000000178  |
| 17 | 0.000000266  | 0.000000509  | 0.000001786  |

|                                              |                             |
|----------------------------------------------|-----------------------------|
| Zero-point correction=                       | 0.626065 (Hartree/Particle) |
| Thermal correction to Energy=                | 0.668338                    |
| Thermal correction to Enthalpy=              | 0.669283                    |
| Thermal correction to Gibbs Free Energy=     | 0.543130                    |
| Sum of electronic and zero-point Energies=   | -2923.316577                |
| Sum of electronic and thermal Energies=      | -2923.274304                |
| Sum of electronic and thermal Enthalpies=    | -2923.273360                |
| Sum of electronic and thermal Free Energies= | -2923.399512                |

B-TS<sub>a1</sub>

|    |              |              |              |
|----|--------------|--------------|--------------|
| 6  | 0.000000908  | 0.000001947  | 0.000001111  |
| 6  | 0.000000648  | -0.000002875 | -0.000000727 |
| 7  | 0.00000071   | 0.000000383  | 0.000000024  |
| 7  | -0.000002797 | 0.000000985  | -0.000000254 |
| 16 | 0.000000125  | -0.000000434 | 0.000000356  |
| 8  | -0.000001265 | 0.000000605  | 0.000000069  |
| 8  | -0.000001313 | -0.000000227 | 0.00000105   |
| 6  | -0.000001397 | -0.000001127 | 0.000001471  |
| 6  | -0.000000531 | -0.000000868 | 0.000001281  |
| 6  | -0.000000485 | -0.000001136 | 0.000001765  |
| 6  | -0.000000642 | -0.00000115  | 0.000001874  |
| 6  | -0.000000763 | -0.000001446 | 0.000002391  |
| 6  | -0.000000524 | -0.000000714 | 0.000002428  |
| 1  | -0.000000236 | 0.000000144  | 0.000000786  |
| 1  | -0.000000013 | -0.000001243 | 0.00000191   |
| 1  | -0.000000932 | -0.000001213 | 0.000003128  |
| 1  | -0.000000088 | -0.000000457 | 0.000002114  |

|    |              |              |              |
|----|--------------|--------------|--------------|
| 6  | -0.00000694  | -0.000002053 | 0.000002945  |
| 1  | -0.000001143 | -0.00000137  | 0.000003466  |
| 1  | -0.000000978 | -0.000001408 | 0.000002702  |
| 1  | -0.000000327 | -0.000001906 | 0.000003125  |
| 6  | 0.000000415  | -0.000001402 | 0.000001057  |
| 6  | 0.00000052   | -0.000000845 | 0.000000556  |
| 1  | 0.000000953  | -0.000001246 | 0.000000576  |
| 1  | 0.000000072  | -0.000000944 | 0.000001105  |
| 6  | 0.000000736  | -0.00000114  | 0.000000644  |
| 1  | 0.000000798  | -0.000000609 | 0.000000023  |
| 1  | 0.000000169  | -0.000000195 | 0.000000457  |
| 6  | 0.00000091   | -0.000000793 | 0.000000533  |
| 1  | 0.000000687  | -0.000001385 | 0.000001176  |
| 1  | 0.000001118  | -0.000001552 | 0.000000643  |
| 1  | 0.000000992  | -0.000001526 | 0.000000628  |
| 1  | 0.000001024  | -0.000001057 | -0.000000048 |
| 1  | 0.00000045   | -0.00000067  | 0.000000507  |
| 6  | 0.000001072  | 0.000000208  | -0.000000942 |
| 6  | 0.000000097  | 0.000000894  | -0.000001074 |
| 1  | 0.000000007  | 0.00000071   | -0.000001092 |
| 1  | -0.000000467 | 0.000001398  | -0.00000131  |
| 6  | 0.000000102  | 0.000001058  | -0.00000248  |
| 1  | 0.000000388  | 0.000000454  | -0.000001358 |
| 1  | 0.000000265  | 0.000001733  | -0.000001934 |
| 6  | 0.00000044   | 0.000001454  | -0.000002265 |
| 1  | -0.000000148 | 0.000001793  | -0.000002001 |
| 1  | -0.000000093 | 0.000001329  | -0.000001685 |
| 1  | 0.00000028   | 0.000001947  | -0.000002876 |
| 1  | 0.000000875  | 0.0000012    | -0.000002636 |
| 1  | 0.000000616  | 0.000001706  | -0.000002881 |
| 16 | -0.000000203 | -0.000000297 | 0.000000039  |
| 8  | 0.000000297  | 0.000000024  | 0.000000092  |
| 8  | 0.000000574  | 0.000000885  | -0.000000975 |
| 6  | -0.000000683 | 0.000000326  | -0.000000226 |
| 6  | -0.000001402 | 0.000002323  | 0.000000784  |
| 6  | -0.000000252 | 0.0000023    | -0.000000549 |
| 6  | -0.000001555 | 0.000001361  | 0.000000805  |
| 1  | -0.000000412 | 0.000000135  | 0.000000597  |
| 6  | -0.000001198 | 0.000002007  | -0.000000628 |
| 1  | -0.000000663 | 0.000001203  | -0.000001064 |
| 6  | -0.000001102 | -0.000000023 | -0.000000788 |
| 1  | -0.000002365 | 0.000000744  | 0.000000297  |
| 1  | -0.00000209  | 0.000001697  | -0.000001208 |
| 6  | -0.000004376 | -0.000000388 | -0.000002883 |



|                                              |              |              |                             |
|----------------------------------------------|--------------|--------------|-----------------------------|
| 1                                            | -0.000002381 | 0.00000225   | 0.000002493                 |
| 1                                            | -0.000001844 | 0.000002526  | 0.000001359                 |
| 1                                            | -0.000002094 | 0.000003647  | 0.000000491                 |
| 1                                            | 0.000000718  | -0.000000859 | -0.000001074                |
| 6                                            | 0.000001909  | -0.000000022 | -0.000001002                |
| 6                                            | 0.000001841  | -0.000000631 | -0.000001943                |
| 6                                            | 0.000002065  | -0.000000491 | -0.000000998                |
| 6                                            | 0.000002224  | -0.000000742 | -0.000000059                |
| 6                                            | 0.000001119  | -0.000001159 | -0.000001528                |
| 1                                            | 0.000002117  | -0.000000661 | -0.000001526                |
| 1                                            | 0.000001277  | 0.000000137  | -0.000001921                |
| 7                                            | 0.000000444  | -0.000000049 | -0.000000295                |
| 8                                            | 0.000002361  | -0.000000061 | -0.000000281                |
| 1                                            | 0.000001954  | -0.000001188 | -0.000000533                |
| 1                                            | 0.000001845  | 0.000000104  | -0.000002191                |
| 17                                           | 0.000002128  | -0.000001609 | 0.000000945                 |
| Zero-point correction=                       |              |              | 0.623801 (Hartree/Particle) |
| Thermal correction to Energy=                |              |              | 0.666481                    |
| Thermal correction to Enthalpy=              |              |              | 0.667425                    |
| Thermal correction to Gibbs Free Energy=     |              |              | 0.540157                    |
| Sum of electronic and zero-point Energies=   |              |              | -2923.300659                |
| Sum of electronic and thermal Energies=      |              |              | -2923.257979                |
| Sum of electronic and thermal Enthalpies=    |              |              | -2923.257035                |
| Sum of electronic and thermal Free Energies= |              |              | -2923.384303                |

#### B-1a

|    |              |              |              |
|----|--------------|--------------|--------------|
| 6  | -0.000007087 | -0.000003679 | 0.000010545  |
| 6  | -0.000009493 | 0.000001805  | -0.000011028 |
| 7  | 0.000008945  | 0.000014501  | -0.000008346 |
| 7  | 0.00001506   | -0.000004558 | 0.000001564  |
| 16 | 0.000000192  | -0.000008013 | 0.000006107  |
| 8  | -0.000003852 | 0.000000951  | -0.000000392 |
| 8  | 0.000001224  | -0.000001581 | -0.000001845 |
| 6  | 0.000000803  | -0.000000981 | 0.000003261  |
| 6  | 0.000001465  | -0.000000037 | 0.000001848  |
| 6  | -0.000002075 | -0.000002408 | 0.000001289  |
| 6  | 0.000001704  | -0.000000479 | -0.000000468 |
| 6  | -0.000000729 | 0.000001067  | 0.000002805  |
| 6  | -0.000001823 | -0.000000888 | 0.000000023  |
| 1  | -0.000000253 | 0.000000086  | -0.000000815 |
| 1  | -0.000000965 | 0.000000005  | 0.000000889  |
| 1  | -0.000000231 | -0.000001256 | 0.000002071  |
| 1  | 0.000000826  | -0.000001901 | 0.000001953  |
| 6  | -0.000000243 | -0.000000509 | 0.000000835  |

|    |              |              |              |
|----|--------------|--------------|--------------|
| 1  | -0.00000371  | -0.000002362 | 0.000001883  |
| 1  | -0.000000957 | 0.000000977  | 0.00000092   |
| 1  | -0.00000328  | -0.000000761 | 0.000003157  |
| 6  | -0.000001962 | -0.000005983 | 0.00000408   |
| 6  | 0.000000752  | -0.000001449 | 0.000003496  |
| 1  | -0.000000059 | -0.000000272 | 0.000002914  |
| 1  | -0.000001483 | -0.000000424 | -0.000001049 |
| 6  | -0.000000907 | -0.000001889 | 0.000001506  |
| 1  | -0.00000025  | -0.000001352 | 0.000000259  |
| 1  | 0.000000147  | -0.000000718 | 0.000000771  |
| 6  | 0.000000328  | -0.000001134 | 0.000002895  |
| 1  | 0.000000257  | -0.000001828 | 0.000002561  |
| 1  | -0.000000618 | -0.000001113 | 0.00000237   |
| 1  | -0.000000016 | -0.000002245 | 0.000002657  |
| 1  | -0.00000011  | -0.00000169  | 0.000001732  |
| 1  | 0.000000841  | -0.000001947 | 0.000001986  |
| 6  | -0.000001564 | -0.000000515 | -0.000001698 |
| 6  | 0.000000808  | 0.000001456  | 0.000000871  |
| 1  | 0.000000639  | 0.000000391  | 0.000000468  |
| 1  | -0.000000454 | -0.00000019  | -0.000000888 |
| 6  | 0.00000093   | -0.000000262 | -0.000002624 |
| 1  | -0.000000642 | 0.000000309  | -0.00000135  |
| 1  | -0.000000175 | 0.000000756  | -0.000001679 |
| 6  | 0.000000877  | 0.000001097  | -0.000000885 |
| 1  | 0.000001395  | 0.000000466  | -0.000001134 |
| 1  | 0.00000096   | -0.000000226 | -0.000000355 |
| 1  | 0.000001228  | 0.000000342  | -0.00000127  |
| 1  | 0.000000376  | 0.000000385  | -0.000000912 |
| 1  | 0.000000577  | 0.000000833  | -0.000001758 |
| 16 | -0.000001717 | 0.0000045    | 0.00000678   |
| 8  | -0.000003359 | 0.000000279  | -0.000004899 |
| 8  | 0.000000426  | -0.000000399 | -0.000000797 |
| 6  | 0.000002334  | 0.000000673  | -0.000000379 |
| 6  | 0.000001222  | -0.000002076 | -0.000002465 |
| 6  | -0.000000367 | 0.000001024  | -0.000002528 |
| 6  | 0.00000184   | 0.000000313  | -0.000002647 |
| 1  | 0.000000737  | 0.000000844  | -0.000000373 |
| 6  | 0.000000145  | 0.000001057  | -0.000000724 |
| 1  | 0.000001881  | 0.000000658  | -0.000001652 |
| 6  | 0.000003052  | 0.000000526  | -0.000000434 |
| 1  | 0.000001489  | 0.000000065  | -0.000001492 |
| 1  | 0.000002045  | 0.000000994  | -0.000002465 |
| 6  | 0.000004244  | 0.000000091  | -0.000002758 |
| 1  | 0.000000568  | 0.000000263  | -0.000002561 |

|    |              |              |              |
|----|--------------|--------------|--------------|
| 1  | 0.00000199   | 0.00000022   | -0.000000168 |
| 1  | 0.00000309   | 0.000000141  | -0.00000271  |
| 1  | -0.000000042 | 0.000001     | 0.000002336  |
| 6  | 0.000001028  | 0.000002337  | -0.000002021 |
| 6  | -0.000002039 | 0.000001765  | -0.000001218 |
| 6  | -0.000002539 | 0.000001751  | -0.000001097 |
| 6  | -0.000002094 | 0.000002046  | -0.000000231 |
| 6  | 0.00000012   | -0.000001293 | -0.00000097  |
| 1  | -0.000002291 | 0.000002202  | -0.000001314 |
| 1  | -0.000001442 | 0.000000884  | -0.000000736 |
| 7  | -0.000010001 | 0.000004241  | 0.000005939  |
| 8  | 0.000005317  | -0.000001816 | -0.000004622 |
| 1  | -0.000002674 | 0.000001403  | -0.000000283 |
| 1  | -0.000001509 | 0.00000217   | -0.000001968 |
| 17 | -0.000002189 | 0.000001361  | -0.000000767 |

|                                              |                             |
|----------------------------------------------|-----------------------------|
| Zero-point correction=                       | 0.626088 (Hartree/Particle) |
| Thermal correction to Energy=                | 0.668279                    |
| Thermal correction to Enthalpy=              | 0.669223                    |
| Thermal correction to Gibbs Free Energy=     | 0.544209                    |
| Sum of electronic and zero-point Energies=   | -2923.308987                |
| Sum of electronic and thermal Energies=      | -2923.266796                |
| Sum of electronic and thermal Enthalpies=    | -2923.265852                |
| Sum of electronic and thermal Free Energies= | -2923.390866                |

#### B-TSa2

|    |              |              |              |
|----|--------------|--------------|--------------|
| 6  | -0.000005265 | 0.00000125   | -0.000000869 |
| 6  | 0.000004752  | -0.000000137 | 0.000000583  |
| 7  | 0.000000905  | -0.000000928 | -0.000001492 |
| 7  | 0.000001314  | 0.000000178  | -0.000000136 |
| 16 | -0.000000849 | 0.000000121  | 0.000001223  |
| 8  | -0.00000035  | 0.000000311  | 0.000000104  |
| 8  | 0.00000005   | -0.000000328 | -0.000000359 |
| 6  | 0.000000553  | 0.000000182  | 0.00000015   |
| 6  | 0.000000723  | -0.00000062  | 0.000000204  |
| 6  | 0.000000793  | -0.000001545 | 0.000000301  |
| 6  | 0.00000109   | -0.000002742 | 0.000000795  |
| 6  | 0.000000338  | -0.000001074 | 0.000000423  |
| 6  | -0.000000137 | -0.00000089  | -0.000000028 |
| 1  | 0.000001057  | -0.000000929 | 0.000000453  |
| 1  | 0.000000845  | -0.000001592 | 0.000001092  |
| 1  | 0.000000632  | -0.000001457 | 0.000000653  |
| 1  | 0.000000167  | -0.000000556 | 0.000000155  |
| 6  | 0.00000044   | -0.000000813 | 0.000001642  |
| 1  | 0.000000768  | -0.000002408 | 0.000000671  |

|    |              |              |              |
|----|--------------|--------------|--------------|
| 1  | 0.000001638  | -0.000001588 | 0.000001731  |
| 1  | 0.000001069  | -0.000001983 | 0.000001077  |
| 6  | -0.000000707 | -0.000000382 | -0.000001191 |
| 6  | -0.000000423 | -0.000000552 | -0.000001568 |
| 1  | -0.000000344 | -0.000001155 | -0.000001168 |
| 1  | -0.00000023  | -0.000000568 | -0.000000909 |
| 6  | -0.000000706 | -0.000000802 | -0.000001736 |
| 1  | -0.000000746 | -0.000000316 | -0.000001666 |
| 1  | -0.000000723 | 0.000000072  | -0.000001357 |
| 6  | -0.000001122 | -0.000000353 | -0.000002296 |
| 1  | -0.000000662 | -0.000000855 | -0.00000183  |
| 1  | -0.000000738 | -0.000001044 | -0.000002053 |
| 1  | -0.000001086 | -0.000000644 | -0.000002694 |
| 1  | -0.000001127 | -0.000000284 | -0.000002507 |
| 1  | -0.000001133 | -0.000000021 | -0.000002325 |
| 6  | -0.000000505 | 0.000001019  | 0.000000015  |
| 6  | -0.000000663 | 0.000001809  | -0.000000496 |
| 1  | -0.000000451 | 0.000000944  | -0.00000037  |
| 1  | -0.000000197 | 0.000000843  | 0.000000316  |
| 6  | -0.000000499 | 0.000001782  | -0.000000249 |
| 1  | -0.000000665 | 0.000000094  | -0.000001411 |
| 1  | 0.00000004   | 0.000000978  | -0.000000022 |
| 6  | -0.000000982 | 0.000001977  | -0.000000857 |
| 1  | -0.000000502 | 0.000001966  | -0.000000079 |
| 1  | -0.000000739 | 0.000001793  | -0.000000768 |
| 1  | -0.000000954 | 0.000002352  | -0.000000839 |
| 1  | -0.000000915 | 0.000001703  | -0.000001111 |
| 1  | -0.000000566 | 0.000001967  | -0.000000571 |
| 16 | -0.000002866 | -0.00000117  | -0.000000633 |
| 8  | -0.000000074 | 0.000000024  | 0.000001137  |
| 8  | 0.000002056  | -0.000000341 | 0.000000581  |
| 6  | 0.000000999  | 0.000001224  | 0.000001155  |
| 6  | 0.000000022  | -0.000000781 | 0.000000984  |
| 6  | 0.000000105  | 0.000000883  | 0.000001349  |
| 6  | 0.000000915  | 0.000001237  | 0.000000651  |
| 1  | 0.000000763  | 0.000000018  | 0.000001116  |
| 6  | 0.000000004  | 0.000000019  | 0.000002616  |
| 1  | 0.000000489  | 0.000001355  | 0.000001223  |
| 6  | -0.000002287 | 0.000001134  | 0.000002311  |
| 1  | 0.000000849  | 0.000000803  | 0.00000183   |
| 1  | 0.000000619  | 0.000001929  | 0.000001954  |
| 6  | 0.000001501  | 0.000001957  | 0.000001146  |
| 1  | 0.000001556  | 0.000002732  | 0.000001795  |
| 1  | 0.000001581  | 0.000000108  | 0.000004115  |

|    |              |              |              |
|----|--------------|--------------|--------------|
| 1  | 0.00000167   | 0.000002496  | 0.000001776  |
| 1  | -0.00000046  | -0.000000915 | -0.000001186 |
| 6  | -0.00000011  | -0.000000301 | 0.000000338  |
| 6  | 0.000000207  | -0.00000038  | -0.000000539 |
| 6  | 0.000000143  | -0.000001004 | -0.000000103 |
| 6  | -0.000000176 | -0.000001316 | -0.00000014  |
| 6  | -0.000000025 | -0.000001371 | -0.000001208 |
| 1  | 0.000000372  | -0.000001136 | 0.000000188  |
| 1  | 0.000000008  | 0.000000469  | 0.000000425  |
| 7  | -0.00000197  | -0.000000349 | 0.000000252  |
| 8  | -0.000000254 | -0.000000413 | -0.000001529 |
| 1  | 0.000000462  | -0.000001604 | 0.000000044  |
| 1  | 0.00000002   | -0.000000182 | 0.000000124  |
| 17 | 0.000000511  | -0.000000966 | -0.000000406 |

|                                              |                             |
|----------------------------------------------|-----------------------------|
| Zero-point correction=                       | 0.624391 (Hartree/Particle) |
| Thermal correction to Energy=                | 0.666504                    |
| Thermal correction to Enthalpy=              | 0.667448                    |
| Thermal correction to Gibbs Free Energy=     | 0.541962                    |
| Sum of electronic and zero-point Energies=   | -2923.304973                |
| Sum of electronic and thermal Energies=      | -2923.262860                |
| Sum of electronic and thermal Enthalpies=    | -2923.261915                |
| Sum of electronic and thermal Free Energies= | -2923.387402                |

B-2a

|    |              |              |              |
|----|--------------|--------------|--------------|
| 6  | 0.000000699  | 0.000001948  | 0.000000368  |
| 6  | -0.000000326 | -0.000002106 | 0.000002082  |
| 7  | -0.000002351 | -0.000004331 | 0.000002744  |
| 7  | 0.000000648  | 0.000000339  | 0.000004199  |
| 16 | 0.000002043  | -0.000000097 | -0.000002154 |
| 8  | -0.000000789 | -0.000001488 | -0.000001585 |
| 8  | -0.00000174  | -0.00000231  | -0.000000627 |
| 6  | 0.000000193  | -0.000001213 | -0.000002906 |
| 6  | 0.000001275  | 0.00000103   | -0.000001758 |
| 6  | 0.000001772  | 0.000001593  | -0.000002936 |
| 6  | 0.0000019    | 0.000001228  | -0.000003663 |
| 6  | 0.000001188  | -0.000000595 | -0.000003561 |
| 6  | 0.000000923  | -0.000000557 | -0.000002364 |
| 1  | 0.000000963  | 0.000001002  | -0.000001518 |
| 1  | 0.000002283  | 0.000002389  | -0.000003039 |
| 1  | 0.000001163  | -0.000000649 | -0.000003942 |
| 1  | 0.00000001   | -0.000002162 | -0.000002617 |
| 6  | 0.000002745  | 0.000001726  | -0.000004636 |
| 1  | 0.000002457  | 0.00000169   | -0.000004683 |
| 1  | 0.000002717  | 0.000001682  | -0.000005461 |

|    |              |              |              |
|----|--------------|--------------|--------------|
| 1  | 0.000002952  | 0.000002808  | -0.000004063 |
| 6  | -0.000000731 | 0.000000361  | 0.000001577  |
| 6  | -0.000001252 | -0.000001926 | 0.000001669  |
| 1  | -0.000000485 | 0.00000045   | 0.000001681  |
| 1  | -0.000000352 | -0.000000194 | 0.000000312  |
| 6  | -0.000001655 | -0.000000754 | 0.000002638  |
| 1  | -0.000001836 | -0.000001285 | 0.000002936  |
| 1  | -0.000001628 | -0.000002452 | 0.000001424  |
| 6  | -0.000002198 | -0.000002324 | 0.000003204  |
| 1  | -0.000001124 | -0.000001106 | 0.000001683  |
| 1  | -0.000001272 | -0.000000151 | 0.000003145  |
| 1  | -0.000002333 | -0.000001877 | 0.000003781  |
| 1  | -0.000002648 | -0.000002143 | 0.000004315  |
| 1  | -0.000002529 | -0.000003121 | 0.000002824  |
| 6  | -0.000003728 | -0.000000897 | 0.000000139  |
| 6  | 0.000000023  | -0.000000325 | 0.000004427  |
| 1  | -0.000001017 | -0.00000021  | 0.000001355  |
| 1  | -0.000000214 | 0.000000027  | 0.000000823  |
| 6  | -0.000002674 | -0.000001121 | 0.000002307  |
| 1  | -0.00000183  | -0.000001198 | 0.000003296  |
| 1  | -0.000001287 | 0.000000363  | 0.000002993  |
| 6  | -0.000002215 | -0.000001115 | 0.000004682  |
| 1  | -0.000001242 | -0.000000779 | 0.000002808  |
| 1  | -0.000002047 | -0.000002348 | 0.000002727  |
| 1  | -0.000002594 | -0.000001542 | 0.000004801  |
| 1  | -0.000002781 | -0.000001614 | 0.00000052   |
| 1  | -0.00000202  | -0.000000081 | 0.000005158  |
| 16 | 0.000000297  | -0.000001088 | 0.000001481  |
| 8  | -0.000000687 | 0.000001776  | -0.000000242 |
| 8  | 0.000001233  | 0.000003394  | 0.000001013  |
| 6  | 0.000001955  | 0.000002641  | -0.000000898 |
| 6  | 0.000000133  | 0.000000343  | -0.00000017  |
| 6  | 0.000001132  | 0.000002547  | -0.000001121 |
| 6  | 0.000001084  | 0.00000103   | -0.000003058 |
| 1  | 0.000000653  | 0.000000085  | -0.000001779 |
| 6  | 0.000001702  | 0.000002371  | -0.000001591 |
| 1  | 0.000001152  | 0.000003147  | 0.000000623  |
| 6  | 0.00000272   | 0.000001823  | -0.000002266 |
| 1  | 0.000001603  | 0.000000108  | -0.000003776 |
| 1  | 0.000002227  | 0.000003378  | -0.000001482 |
| 6  | 0.000002395  | 0.000002188  | -0.000003799 |
| 1  | 0.000002039  | 0.000001164  | -0.000004471 |
| 1  | 0.000003087  | 0.000002861  | -0.000004342 |
| 1  | 0.000002597  | 0.000001491  | -0.000005388 |

|                                              |              |              |                             |
|----------------------------------------------|--------------|--------------|-----------------------------|
| 1                                            | -0.00000102  | 0.000000193  | 0.000002402                 |
| 8                                            | -0.000001358 | -0.000002124 | 0.000000611                 |
| Zero-point correction=                       |              |              | 0.544417 (Hartree/Particle) |
| Thermal correction to Energy=                |              |              | 0.580545                    |
| Thermal correction to Enthalpy=              |              |              | 0.581489                    |
| Thermal correction to Gibbs Free Energy=     |              |              | 0.471194                    |
| Sum of electronic and zero-point Energies=   |              |              | -2215.583659                |
| Sum of electronic and thermal Energies=      |              |              | -2215.547531                |
| Sum of electronic and thermal Enthalpies=    |              |              | -2215.546586                |
| Sum of electronic and thermal Free Energies= |              |              | -2215.656881                |

#### B-TSe1

|    |              |              |              |
|----|--------------|--------------|--------------|
| 6  | -0.000001895 | 0.000003482  | -0.000000011 |
| 6  | -0.000001969 | 0.000000368  | -0.00000006  |
| 7  | 0.000002385  | -0.000001016 | -0.000000794 |
| 7  | 0.000000024  | 0.000000302  | -0.000000129 |
| 16 | 0.000000409  | 0.000000423  | -0.000000338 |
| 8  | -0.000000486 | 0.000000537  | 0.000001322  |
| 8  | 0.000000521  | 0.000000035  | 0.000000725  |
| 6  | -0.000000224 | -0.000000459 | 0.000000833  |
| 6  | 0.000000118  | -0.000000056 | 0.00000107   |
| 6  | -0.000001398 | -0.000001491 | 0.000001105  |
| 6  | -0.000000847 | -0.000000933 | 0.000001082  |
| 6  | 0.000000057  | 0.000000424  | 0.000001057  |
| 6  | 0.000000136  | -0.000000566 | 0.000001049  |
| 1  | -0.000000566 | -0.000000343 | 0.000000948  |
| 1  | -0.000001102 | -0.000000718 | 0.000001144  |
| 1  | -0.000000045 | -0.000000406 | 0.000001245  |
| 1  | 0.000000112  | -0.00000002  | 0.000000963  |
| 6  | -0.000001371 | -0.000000831 | 0.000001234  |
| 1  | -0.000001617 | -0.000000911 | 0.000001546  |
| 1  | -0.000000416 | -0.000001348 | 0.000000079  |
| 1  | -0.000000605 | 0.00000001   | 0.000001413  |
| 6  | 0.000000642  | 0.000000239  | 0.000000136  |
| 6  | 0.000000008  | 0.000000006  | -0.000000116 |
| 1  | 0.000000796  | 0.000000136  | 0.000000691  |
| 1  | 0.000000527  | 0.000000568  | -0.000000578 |
| 6  | 0.000000535  | 0.000000028  | -0.000000069 |
| 1  | 0.000000298  | 0.000000177  | 0.000000373  |
| 1  | 0.000000062  | -0.000000004 | -0.000000092 |
| 6  | 0.000000216  | 0.000000195  | -0.000000259 |
| 1  | 0.000000814  | 0.000000479  | -0.000000228 |
| 1  | 0.000000717  | 0.000000016  | 0.000000338  |
| 1  | 0.000000477  | 0.000000287  | -0.000000254 |

|    |              |              |              |
|----|--------------|--------------|--------------|
| 1  | 0.000000119  | 0.000000082  | -0.000000008 |
| 1  | 0.000000166  | 0.000000201  | -0.000000462 |
| 6  | -0.000000455 | 0.000000556  | -0.000000863 |
| 6  | -0.000000634 | -0.000000355 | 0.000000047  |
| 1  | -0.000000431 | -0.000000406 | -0.000000402 |
| 1  | -0.000000641 | -0.000000276 | -0.000000103 |
| 6  | -0.000000901 | -0.000000103 | -0.000000057 |
| 1  | 0.000000027  | -0.000000275 | 0.000000058  |
| 1  | -0.000000067 | 0.000000128  | -0.000000037 |
| 6  | -0.000000725 | -0.000000517 | 0.000000269  |
| 1  | -0.000000843 | -0.000000397 | -0.000000264 |
| 1  | -0.000000892 | -0.000000476 | 0.000000087  |
| 1  | -0.000000873 | -0.000000465 | 0.000000275  |
| 1  | -0.000000431 | -0.000000027 | 0.000000513  |
| 1  | -0.000000466 | -0.000000243 | 0.000000114  |
| 16 | 0.000000186  | -0.000000483 | -0.000000479 |
| 8  | 0.000000454  | 0.000000528  | -0.000000851 |
| 8  | -0.000000161 | 0.000000171  | -0.000000447 |
| 6  | -0.000000157 | 0.000000154  | -0.000001036 |
| 6  | -0.000000385 | 0.000000144  | -0.000001065 |
| 6  | -0.000000044 | 0.000000007  | -0.000001138 |
| 6  | -0.000000435 | 0.000000119  | -0.000000986 |
| 1  | -0.000000315 | -0.000000008 | -0.000001024 |
| 6  | -0.000000991 | -0.000000142 | -0.000002138 |
| 1  | -0.000000266 | 0.000000165  | -0.000001118 |
| 6  | -0.000000098 | 0.000000226  | -0.000001652 |
| 1  | -0.000000852 | -0.000000118 | -0.000001518 |
| 1  | -0.000000704 | 0.000000034  | -0.000001761 |
| 6  | -0.000001218 | -0.000000032 | -0.00000209  |
| 1  | -0.000001082 | -0.000000062 | -0.000001956 |
| 1  | -0.000000899 | 0.000000256  | -0.000001801 |
| 1  | -0.000001416 | 0.000000014  | -0.000002388 |
| 1  | -0.000000705 | -0.000000008 | 0.000000469  |
| 8  | -0.000000151 | -0.000000126 | 0.000001533  |
| 6  | 0.000001168  | 0.000000066  | -0.000000073 |
| 6  | 0.000001664  | 0.000000763  | -0.000000305 |
| 6  | 0.000001057  | 0.000000145  | 0.000000953  |
| 6  | 0.000001285  | 0.000000481  | 0.000000834  |
| 6  | 0.000002088  | 0.000000089  | 0.000000472  |
| 6  | 0.000001288  | 0.000000828  | 0.000000136  |
| 6  | 0.000000453  | -0.000001554 | -0.000000051 |
| 6  | 0.000001223  | -0.000001656 | 0.000000878  |
| 1  | 0.000001195  | 0.000000297  | 0.000001118  |
| 1  | 0.000001572  | 0.000000528  | 0.000001172  |



|                                              |             |             |                             |
|----------------------------------------------|-------------|-------------|-----------------------------|
| 1                                            | 0.00000194  | 0.000000837 | 0.000000544                 |
| 1                                            | 0.000001546 | 0.000000732 | -0.000000109                |
| 1                                            | 0.000000717 | 0.000000808 | -0.000000763                |
| 1                                            | 0.000000378 | 0.000000541 | -0.000000152                |
| 7                                            | 0.000002414 | 0.000001434 | 0.000001359                 |
| 1                                            | 0.000001153 | 0.000000088 | 0.000000784                 |
| Zero-point correction=                       |             |             | 0.676109 (Hartree/Particle) |
| Thermal correction to Energy=                |             |             | 0.719227                    |
| Thermal correction to Enthalpy=              |             |             | 0.720171                    |
| Thermal correction to Gibbs Free Energy=     |             |             | 0.592469                    |
| Sum of electronic and zero-point Energies=   |             |             | -2579.279416                |
| Sum of electronic and thermal Energies=      |             |             | -2579.236298                |
| Sum of electronic and thermal Enthalpies=    |             |             | -2579.235353                |
| Sum of electronic and thermal Free Energies= |             |             | -2579.363056                |

#### B-1e

|    |              |              |              |
|----|--------------|--------------|--------------|
| 6  | -0.000004932 | -0.000001055 | -0.000001374 |
| 6  | 0.000002839  | 0.000005045  | 0.000000288  |
| 7  | 0.000001122  | 0.000000529  | 0.000000692  |
| 7  | 0.000003901  | 0.000005733  | -0.000004397 |
| 16 | 0.000001676  | -0.000007945 | -0.000003612 |
| 8  | -0.000000723 | 0.00000024   | 0.000000287  |
| 8  | -0.000000289 | 0.000003436  | 0.000002907  |
| 6  | 0.000002684  | -0.000002629 | 0.000001316  |
| 6  | -0.000001759 | 0.000002577  | 0.000000819  |
| 6  | -0.000000121 | 0.000000444  | 0.000000007  |
| 6  | 0.000000639  | 0.000002985  | -0.00000013  |
| 6  | 0.000000659  | -0.000000062 | 0.00000018   |
| 6  | -0.000001954 | 0.000000362  | 0.000001775  |
| 1  | 0.000001053  | -0.000000507 | 0.000001104  |
| 1  | -0.000000155 | 0.000000965  | 0.000000476  |
| 1  | -0.000000522 | 0.000000545  | 0.000000821  |
| 1  | 0.000000049  | -0.000000001 | 0.000000029  |
| 6  | 0.000000551  | 0.000001659  | 0.000000227  |
| 1  | -0.000000761 | 0.000000175  | 0.000000918  |
| 1  | -0.000000149 | 0.000000489  | 0.000001808  |
| 1  | -0.000000721 | 0.000000206  | 0.000001561  |
| 6  | 0.00000172   | -0.000000002 | -0.000001349 |
| 6  | -0.000001984 | 0.000000556  | 0.000003984  |
| 1  | -0.00000011  | -0.000000315 | 0.000000149  |
| 1  | 0.000000091  | -0.000000843 | 0.000000921  |
| 6  | 0.000001133  | -0.000001185 | -0.00000126  |
| 1  | 0.00000036   | -0.000000408 | -0.00000038  |
| 1  | 0.000000155  | 0.000000143  | -0.000000717 |

|    |              |              |              |
|----|--------------|--------------|--------------|
| 6  | -0.000000144 | -0.000000049 | -0.000000058 |
| 1  | -0.000000138 | -0.000000347 | 0.000000269  |
| 1  | -0.000000006 | -0.000000414 | 0.000000035  |
| 1  | 0.000000425  | -0.000000342 | -0.000000228 |
| 1  | 0.000000028  | -0.000000341 | -0.000000178 |
| 1  | 0.000000494  | -0.000000476 | -0.000000456 |
| 6  | 0.000001136  | -0.00000143  | 0.000001354  |
| 6  | -0.000000171 | 0.000000591  | -0.000002456 |
| 1  | -0.000000209 | 0.000000203  | -0.000000741 |
| 1  | 0.000000442  | 0.000000409  | -0.000000296 |
| 6  | 0.000000129  | 0.000000655  | 0.000000833  |
| 1  | -0.000000347 | 0.000000103  | 0.000000439  |
| 1  | 0.000000062  | 0.000000019  | -0.000000013 |
| 6  | -0.000000956 | -0.000000197 | 0.000000019  |
| 1  | -0.000000211 | 0.000000368  | -0.000000732 |
| 1  | -0.000000422 | 0.000000767  | -0.000000345 |
| 1  | -0.000000337 | 0.000000648  | -0.000000315 |
| 1  | -0.000000229 | 0.000000719  | -0.000000092 |
| 1  | -0.000000076 | 0.000000481  | -0.000000022 |
| 16 | -0.000010127 | -0.000002287 | 0.000012504  |
| 8  | 0.00000182   | 0.000001668  | -0.000005469 |
| 8  | 0.000004737  | 0.000000116  | -0.000002273 |
| 6  | 0.000000024  | 0.000002104  | -0.000002569 |
| 6  | -0.000000288 | -0.000000099 | -0.00000206  |
| 6  | -0.000001223 | -0.000000187 | -0.000000695 |
| 6  | -0.000000246 | 0.000000623  | -0.000000085 |
| 1  | 0.000000114  | -0.000000548 | -0.000000355 |
| 6  | -0.000000445 | -0.000000861 | -0.000001897 |
| 1  | 0.000000061  | -0.000000021 | -0.000001086 |
| 6  | 0.000000686  | -0.000001175 | 0.000000098  |
| 1  | -0.000000328 | -0.000000065 | -0.000000586 |
| 1  | -0.000000196 | -0.000000301 | -0.000000902 |
| 6  | -0.000001693 | 0.000001317  | -0.000000396 |
| 1  | -0.000000299 | 0.000000007  | -0.000001755 |
| 1  | 0.000000044  | -0.000000102 | -0.00000195  |
| 1  | 0.000000026  | -0.000000221 | -0.000002319 |
| 1  | 0.000000075  | -0.000000231 | -0.000000958 |
| 8  | -0.000005753 | -0.000000243 | 0.000000565  |
| 6  | 0.000000852  | -0.000000541 | 0.000001888  |
| 6  | 0.000002785  | 0.000000288  | 0.000002193  |
| 6  | -0.000002339 | -0.000000083 | -0.000000699 |
| 6  | 0.000000869  | 0.000000648  | -0.000000024 |
| 6  | 0.000001813  | -0.000000724 | 0.000000686  |
| 6  | -0.00000117  | -0.000001278 | -0.000000005 |

|                                              |              |              |                             |
|----------------------------------------------|--------------|--------------|-----------------------------|
| 6                                            | 0.000002295  | -0.000002252 | 0.00000211                  |
| 6                                            | 0.00000259   | -0.000003331 | -0.000003435                |
| 1                                            | 0.000000927  | -0.000000497 | 0.000000595                 |
| 1                                            | 0.000000508  | -0.000000999 | -0.000000106                |
| 1                                            | 0.000000216  | -0.000000251 | 0.000000254                 |
| 1                                            | 0.000000132  | 0.000000029  | 0.000000825                 |
| 1                                            | -0.000000281 | -0.000000485 | 0.000000056                 |
| 1                                            | -0.000000063 | 0.000002739  | -0.000000496                |
| 7                                            | -0.000003864 | -0.000004362 | -0.000000143                |
| 1                                            | 0.000003084  | 0.000000396  | -0.000003252                |
| Zero-point correction=                       |              |              | 0.677978 (Hartree/Particle) |
| Thermal correction to Energy=                |              |              | 0.721060                    |
| Thermal correction to Enthalpy=              |              |              | 0.722004                    |
| Thermal correction to Gibbs Free Energy=     |              |              | 0.593403                    |
| Sum of electronic and zero-point Energies=   |              |              | -2579.286857                |
| Sum of electronic and thermal Energies=      |              |              | -2579.243775                |
| Sum of electronic and thermal Enthalpies=    |              |              | -2579.242830                |
| Sum of electronic and thermal Free Energies= |              |              | -2579.371432                |

#### B-TSf1

|    |              |              |              |
|----|--------------|--------------|--------------|
| 6  | -0.000000079 | -0.000002119 | -0.000000272 |
| 6  | 0.000003984  | 0.000000009  | 0.000002182  |
| 7  | -0.000002693 | 0.000001944  | 0.000001342  |
| 7  | -0.000001514 | -0.000000062 | 0.000000664  |
| 16 | -0.000000748 | 0.000000227  | -0.000000295 |
| 8  | 0.000000172  | 0.000000155  | -0.000001782 |
| 8  | 0.000000115  | -0.000000406 | -0.000000647 |
| 6  | -0.000000193 | 0.000000199  | -0.000001338 |
| 6  | -0.000000786 | 0.000000729  | -0.000001486 |
| 6  | -0.000001097 | 0.000000328  | -0.000001755 |
| 6  | -0.000001433 | 0.000000963  | -0.000001763 |
| 6  | -0.000000973 | 0.000000921  | -0.000000708 |
| 6  | -0.000000831 | 0.000000575  | -0.000000991 |
| 1  | -0.000000148 | 0.000000404  | -0.000001881 |
| 1  | -0.000000971 | 0.000000081  | -0.000002247 |
| 1  | -0.000001584 | 0.000000883  | -0.000000937 |
| 1  | -0.000000851 | 0.000000304  | -0.000000419 |
| 6  | -0.000001834 | 0.000001019  | -0.000001744 |
| 1  | -0.000002131 | 0.000000976  | -0.000001703 |
| 1  | -0.000001837 | 0.000001446  | -0.000002091 |
| 1  | -0.000001588 | 0.000001209  | -0.00000183  |
| 6  | -0.000000117 | 0.000000262  | -0.000002056 |
| 6  | 0.000000385  | 0.000000337  | -0.000000677 |
| 1  | -0.000000324 | 0.000000208  | -0.000000905 |

|    |              |              |              |
|----|--------------|--------------|--------------|
| 1  | -0.00000011  | -0.000000031 | 0.000000313  |
| 6  | 0.00000012   | 0.000000416  | -0.00000149  |
| 1  | 0.000000523  | -0.000000019 | -0.000001382 |
| 1  | 0.000000443  | 0.000000167  | -0.000001082 |
| 6  | 0.000000658  | -0.000000108 | -0.000001551 |
| 1  | -0.000000106 | 0.000000071  | -0.000001006 |
| 1  | -0.000000403 | 0.000000046  | -0.000001664 |
| 1  | 0.000000223  | 0.000000313  | -0.000001907 |
| 1  | 0.000000581  | 0.000000251  | -0.000002147 |
| 1  | 0.000000765  | 0.000000101  | -0.000001627 |
| 6  | 0.000000914  | -0.000000615 | 0.000000759  |
| 6  | 0.000001224  | -0.000000868 | 0.000001019  |
| 1  | 0.000001274  | -0.000000791 | 0.000000022  |
| 1  | 0.000000697  | -0.000000588 | 0.000000832  |
| 6  | 0.000001717  | -0.000000877 | 0.000001376  |
| 1  | 0.000001392  | -0.000000065 | 0.000000785  |
| 1  | 0.000000903  | -0.000000704 | 0.000001257  |
| 6  | 0.000002012  | -0.000001238 | 0.000001494  |
| 1  | 0.000001514  | -0.000000904 | 0.000001387  |
| 1  | 0.000001949  | -0.000001013 | 0.00000008   |
| 1  | 0.00000226   | -0.000001283 | 0.00000171   |
| 1  | 0.000002101  | -0.000001137 | 0.000001389  |
| 1  | 0.000001737  | -0.00000109  | 0.000001943  |
| 16 | 0.000000445  | -0.000000228 | 0.000000335  |
| 8  | -0.000000088 | -0.000000199 | 0.000000166  |
| 8  | -0.00000015  | -0.000000158 | 0.000001446  |
| 6  | -0.000000124 | -0.000000022 | 0.000000536  |
| 6  | 0.000000289  | -0.000000578 | 0.000000044  |
| 6  | -0.00000032  | -0.00000022  | 0.000000995  |
| 6  | -0.000000223 | -0.000000402 | 0.000000898  |
| 1  | 0.000000154  | 0.000000209  | -0.000000051 |
| 6  | 0.000000117  | -0.000000167 | 0.000000161  |
| 1  | -0.000000021 | -0.000000182 | 0.000001478  |
| 6  | 0.000000028  | -0.000000091 | 0.000000555  |
| 1  | 0.000000031  | 0.000000147  | -0.000000239 |
| 1  | -0.000000008 | -0.000000287 | 0.000001382  |
| 6  | 0.000000085  | 0.000000131  | 0.000000496  |
| 1  | 0.000001013  | -0.000000406 | 0.000000216  |
| 1  | -0.000000405 | -0.000000193 | 0.000001439  |
| 1  | -0.000000697 | 0.000000249  | -0.000000248 |
| 1  | 0.000001081  | -0.000000973 | 0.000000384  |
| 8  | 0.000000485  | -0.000000564 | -0.000000838 |
| 6  | -0.000000638 | -0.000000337 | 0.000001121  |
| 6  | -0.000000557 | -0.000000395 | 0.000001047  |

|   |              |               |              |
|---|--------------|---------------|--------------|
| 6 | -0.00000719  | 0.00000018    | 0.000000367  |
| 6 | -0.000001121 | 0.000000357   | 0.000000737  |
| 6 | -0.000001439 | 0.000000469   | 0.000001205  |
| 6 | -0.000000856 | 0.000000087   | 0.000001599  |
| 6 | -0.000000214 | -0.000000206  | 0.000000984  |
| 6 | 0.000001223  | -0.000000134  | 0.000001532  |
| 1 | -0.000001009 | 0.0000000892  | 0.000000158  |
| 1 | -0.000001644 | 0.0000000572  | 0.0000000547 |
| 1 | -0.000001669 | 0.000000037   | 0.000001468  |
| 1 | -0.000000865 | -0.000000005  | 0.000001946  |
| 1 | 0.000000023  | -0.0000000314 | 0.000001737  |
| 1 | 0.000000653  | -0.0000000591 | 0.000000732  |
| 7 | 0.000002273  | 0.000002275   | -0.000002356 |
| 1 | -0.000000576 | 0.000000701   | -0.000000066 |

|                                              |                             |
|----------------------------------------------|-----------------------------|
| Zero-point correction=                       | 0.677288 (Hartree/Particle) |
| Thermal correction to Energy=                | 0.720024                    |
| Thermal correction to Enthalpy=              | 0.720968                    |
| Thermal correction to Gibbs Free Energy=     | 0.595157                    |
| Sum of electronic and zero-point Energies=   | -2579.250591                |
| Sum of electronic and thermal Energies=      | -2579.207855                |
| Sum of electronic and thermal Enthalpies=    | -2579.206911                |
| Sum of electronic and thermal Free Energies= | -2579.332721                |

#### B-1f

|    |              |              |              |
|----|--------------|--------------|--------------|
| 6  | 0.000002172  | 0.000004432  | 0.000000056  |
| 6  | -0.000002487 | -0.000000687 | -0.000007387 |
| 7  | -0.000002972 | -0.000001579 | -0.000005717 |
| 7  | -0.000000536 | -0.000000757 | 0.000011171  |
| 16 | -0.000002698 | -0.000001339 | 0.000002974  |
| 8  | 0.000001803  | -0.000001509 | -0.000001049 |
| 8  | 0.000001986  | -0.000000125 | -0.000001703 |
| 6  | 0.000001261  | -0.000000677 | -0.000001821 |
| 6  | 0.000001237  | -0.000003594 | -0.000000646 |
| 6  | -0.000001162 | -0.000000333 | -0.000001604 |
| 6  | 0.000000434  | -0.000001833 | -0.000001543 |
| 6  | 0.000001835  | -0.000003381 | -0.000002074 |
| 6  | -0.000000066 | -0.000001109 | -0.000000121 |
| 1  | -0.000000529 | -0.000002847 | 0.000000187  |
| 1  | -0.000000238 | -0.000000387 | -0.000000369 |
| 1  | 0.000000864  | -0.000002189 | -0.000000311 |
| 1  | 0.000000949  | -0.000001568 | -0.000001487 |
| 6  | -0.000000029 | -0.000003241 | -0.000002274 |
| 1  | 0.000000537  | -0.000003446 | -0.000002601 |
| 1  | 0.000000612  | -0.000005582 | -0.000002495 |

|    |             |             |             |
|----|-------------|-------------|-------------|
| 1  | 0.00000677  | -0.00004653 | -0.00000773 |
| 6  | -0.00001721 | 0.00000268  | 0.00001808  |
| 6  | 0.00002855  | 0.00000356  | -0.00003995 |
| 1  | 0.00001563  | 0.00001918  | -0.00003306 |
| 1  | 0.00001966  | 0.00002928  | -0.0000008  |
| 6  | 0.00000612  | 0.00001692  | -0.00000269 |
| 1  | 0.00000219  | 0.00002075  | -0.00002033 |
| 1  | 0.00000836  | 0.00001403  | -0.0000117  |
| 6  | 0.00001331  | 0.00002811  | -0.00003631 |
| 1  | 0.00001506  | 0.00002971  | -0.00002214 |
| 1  | 0.00001324  | 0.00002745  | -0.00002748 |
| 1  | 0.00001649  | 0.00003233  | -0.00003528 |
| 1  | 0.0000187   | 0.00001976  | -0.00003595 |
| 1  | 0.00001361  | 0.00002275  | -0.00002818 |
| 6  | 0.00000484  | -0.00003046 | 0.00000518  |
| 6  | -0.00001823 | -0.00000443 | 0.00002656  |
| 1  | -0.00000894 | -0.00001331 | 0.00001599  |
| 1  | -0.00000074 | -0.00001178 | 0.00001144  |
| 6  | -0.00001406 | -0.00001603 | 0.00003529  |
| 1  | -0.00000948 | -0.00001111 | 0.00002588  |
| 1  | -0.00000938 | 0.00000232  | 0.00003373  |
| 6  | -0.0000231  | -0.00002067 | 0.00004118  |
| 1  | -0.00001601 | -0.00001672 | 0.00003016  |
| 1  | -0.00001365 | -0.00002607 | 0.00002842  |
| 1  | -0.00002171 | -0.00002447 | 0.00004645  |
| 1  | -0.00001967 | -0.00001788 | 0.00004425  |
| 1  | -0.00002064 | -0.00000969 | 0.00004636  |
| 16 | 0.00002022  | 0.00002239  | -0.00006705 |
| 8  | -0.00000312 | 0.00001748  | 0.00001815  |
| 8  | -0.00001161 | 0.00000276  | 0.00002886  |
| 6  | -0.00000222 | 0.00001875  | -0.00000045 |
| 6  | -0.00001209 | -0.00001359 | 0.00001202  |
| 6  | 0.00001581  | 0.00001723  | 0.00001598  |
| 6  | 0.00002529  | -0.00000012 | 0.00000535  |
| 1  | 0.00001058  | -0.00000129 | -0.00001199 |
| 6  | 0.00000112  | -0.00001527 | -0.00000672 |
| 1  | -0.00000625 | 0.00001312  | 0.0000129   |
| 6  | -0.00000828 | 0.00002104  | -0.0000022  |
| 1  | 0.00000458  | -0.00000717 | -0.00002313 |
| 1  | 0.00000228  | 0.00000709  | 0.0000006   |
| 6  | 0.00000848  | -0.00000187 | -0.00002205 |
| 1  | 0.00000816  | -0.00001786 | -0.00000596 |
| 1  | 0.00000357  | 0.00000051  | -0.00000627 |
| 1  | 0.00000995  | -0.00000424 | -0.00002649 |

|                                                     |              |              |                                    |
|-----------------------------------------------------|--------------|--------------|------------------------------------|
| 1                                                   | -0.000000101 | -0.000000394 | -0.000000327                       |
| 8                                                   | 0.000000308  | 0.000001258  | 0.000000315                        |
| 6                                                   | -0.000001526 | 0.000004225  | 0.000001109                        |
| 6                                                   | 0.000004565  | -0.000001004 | -0.000005346                       |
| 6                                                   | -0.000002375 | 0.000000132  | 0.000003771                        |
| 6                                                   | 0.000001786  | 0.000001619  | -0.000001017                       |
| 6                                                   | -0.000001061 | 0.000002093  | 0.000001197                        |
| 6                                                   | 0.000000032  | 0.000002527  | 0.000002551                        |
| 6                                                   | -0.000002513 | 0.000000128  | 0.000003023                        |
| 6                                                   | 0.000000212  | 0.000000786  | 0.000001376                        |
| 1                                                   | 0.000000082  | 0.000001348  | -0.000001592                       |
| 1                                                   | 0.000000959  | 0.000000245  | -0.000000093                       |
| 1                                                   | 0.000000256  | 0.000003807  | 0.000000446                        |
| 1                                                   | -0.000000121 | 0.000002619  | 0.000001525                        |
| 1                                                   | -0.000001423 | 0.000001897  | 0.000002329                        |
| 1                                                   | -0.00000185  | -0.000000333 | 0.000004176                        |
| 7                                                   | -0.000005815 | 0.000005831  | 0.000007662                        |
| 1                                                   | 0.000000228  | -0.000002683 | -0.000000692                       |
| <b>Zero-point correction=</b>                       |              |              | <b>0.678956 (Hartree/Particle)</b> |
| <b>Thermal correction to Energy=</b>                |              |              | <b>0.721744</b>                    |
| <b>Thermal correction to Enthalpy=</b>              |              |              | <b>0.722689</b>                    |
| <b>Thermal correction to Gibbs Free Energy=</b>     |              |              | <b>0.596990</b>                    |
| <b>Sum of electronic and zero-point Energies=</b>   |              |              | <b>-2579.278739</b>                |
| <b>Sum of electronic and thermal Energies=</b>      |              |              | <b>-2579.235951</b>                |
| <b>Sum of electronic and thermal Enthalpies=</b>    |              |              | <b>-2579.235007</b>                |
| <b>Sum of electronic and thermal Free Energies=</b> |              |              | <b>-2579.360706</b>                |
| <b>B-TSa3</b>                                       |              |              |                                    |
| 6                                                   | 0.00000134   | -0.000001703 | 0.000000071                        |
| 6                                                   | 0.000001321  | 0.000000437  | 0.000002894                        |
| 7                                                   | -0.000000869 | 0.000000799  | 0.000000043                        |
| 7                                                   | -0.000000606 | -0.000000273 | -0.000000162                       |
| 16                                                  | 0.000001578  | 0.000000849  | -0.000001121                       |
| 8                                                   | 0.000001283  | 0.000002405  | -0.000000163                       |
| 8                                                   | 0.000000978  | 0.000000722  | -0.000002339                       |
| 6                                                   | 0.000001062  | 0.000002342  | -0.00000148                        |
| 6                                                   | 0.000001583  | 0.000002109  | -0.00000158                        |
| 6                                                   | 0.00000191   | 0.000002357  | -0.000001288                       |
| 6                                                   | 0.000001568  | 0.000002252  | -0.00000271                        |
| 6                                                   | 0.000001487  | 0.000001391  | -0.000003247                       |
| 6                                                   | 0.000001239  | 0.000000948  | -0.000002496                       |
| 1                                                   | 0.000001821  | 0.00000028   | -0.000000038                       |
| 1                                                   | 0.000002123  | 0.000003453  | -0.000001182                       |
| 1                                                   | 0.000001164  | 0.000001038  | -0.000003867                       |
| 1                                                   | 0.000000662  | 0.000000295  | -0.000002917                       |

|    |              |              |              |
|----|--------------|--------------|--------------|
| 6  | 0.000002176  | 0.000002807  | -0.000002932 |
| 1  | 0.000001717  | 0.000002085  | -0.000003572 |
| 1  | 0.000002552  | 0.00000322   | -0.000003728 |
| 1  | 0.000002114  | 0.000002943  | -0.000002328 |
| 6  | -0.000002171 | -0.000000403 | -0.000003947 |
| 6  | -0.000000705 | -0.000001322 | -0.000002148 |
| 1  | 0.000000696  | 0.000000067  | -0.000001524 |
| 1  | 0.000000601  | -0.000002435 | 0.000003098  |
| 6  | -0.000000901 | -0.000002236 | -0.000002322 |
| 1  | -0.000000419 | -0.000000899 | -0.000002438 |
| 1  | -0.000000774 | -0.000001638 | -0.000001852 |
| 6  | -0.000001192 | -0.000003054 | -0.000003193 |
| 1  | -0.000001453 | -0.00000289  | -0.000001663 |
| 1  | -0.000000841 | -0.000002059 | -0.000002763 |
| 1  | -0.000001508 | -0.000003605 | -0.000003563 |
| 1  | -0.000000922 | -0.000002509 | -0.000004078 |
| 1  | -0.000001441 | -0.000003208 | -0.000003184 |
| 6  | -0.000000101 | -0.000000012 | 0.000001875  |
| 6  | 0.000000158  | 0.000000878  | 0.000003163  |
| 1  | 0.000000665  | 0.000001364  | 0.000001448  |
| 1  | -0.000000064 | 0.000000646  | 0.000001422  |
| 6  | 0.000000543  | 0.000001721  | 0.000003592  |
| 1  | 0.000000263  | 0.000001412  | 0.000003166  |
| 1  | -0.000000392 | 0.000000201  | 0.000003435  |
| 6  | 0.000000258  | 0.000001743  | 0.0000049    |
| 1  | 0.000000139  | 0.000001328  | 0.000003568  |
| 1  | 0.000000846  | 0.000002283  | 0.00000336   |
| 1  | 0.000000479  | 0.00000229   | 0.000005368  |
| 1  | 0.000000462  | 0.000002165  | 0.000005048  |
| 1  | -0.00000023  | 0.000001145  | 0.000005357  |
| 16 | -0.000001346 | -0.000001536 | 0.000000321  |
| 8  | -0.000000968 | -0.00000073  | -0.000000003 |
| 8  | -0.000001222 | -0.000001278 | 0.000001633  |
| 6  | -0.000000539 | -0.000001469 | 0.000000437  |
| 6  | -0.000000116 | 0.000000377  | -0.000001514 |
| 6  | -0.000001311 | -0.000002076 | 0.000001075  |
| 6  | -0.000002132 | -0.000001245 | 0.000002173  |
| 1  | 0.00000036   | -0.000000674 | -0.000001117 |
| 6  | 0.000001086  | -0.00000048  | -0.000004051 |
| 1  | -0.000001198 | -0.000001641 | 0.000001317  |
| 6  | -0.000000039 | -0.000000646 | -0.000000468 |
| 1  | -0.000000087 | -0.000000847 | -0.000002478 |
| 1  | -0.000001318 | -0.000001654 | 0.000000335  |
| 6  | -0.000000466 | -0.000001183 | -0.000002224 |



|   |              |              |               |
|---|--------------|--------------|---------------|
| 1 | 0.000003014  | 0.000001212  | -0.000000524  |
| 1 | -0.00000312  | -0.0000026   | 0.000000688   |
| 1 | -0.000000716 | -0.000001836 | -0.0000006094 |
| 1 | 0.000000173  | -0.000000737 | 0.000000409   |
| 8 | 0.00000079   | 0.000002134  | 0.00000067    |
| 6 | -0.000001131 | 0.000000238  | 0.000002198   |
| 6 | 0.000000184  | -0.000000264 | 0.000001802   |
| 6 | -0.000000829 | -0.000000515 | 0.000001109   |
| 6 | -0.000000989 | -0.000001412 | 0.000001935   |
| 6 | -0.00000106  | -0.000002117 | 0.000001878   |
| 6 | -0.000002103 | -0.000001671 | 0.000002493   |
| 6 | -0.000001063 | 0.000000859  | 0.00000315    |
| 6 | 0.000000325  | 0.000000526  | 0.000002      |
| 1 | -0.000000422 | -0.000000042 | 0.000000849   |
| 1 | -0.000001464 | -0.000001825 | 0.000001203   |
| 1 | -0.00000204  | -0.000002816 | 0.000001737   |
| 1 | -0.000001448 | -0.000001767 | 0.000000155   |
| 1 | -0.000000469 | -0.000000606 | 0.000002434   |
| 1 | 0.000000839  | 0.000001663  | 0.000001512   |
| 7 | 0.000000082  | 0.000000744  | 0.000001366   |
| 1 | 0.000000549  | 0.000001668  | 0.000000932   |

|                                              |                             |
|----------------------------------------------|-----------------------------|
| Zero-point correction=                       | 0.676675 (Hartree/Particle) |
| Thermal correction to Energy=                | 0.718933                    |
| Thermal correction to Enthalpy=              | 0.719877                    |
| Thermal correction to Gibbs Free Energy=     | 0.593023                    |
| Sum of electronic and zero-point Energies=   | -2579.280925                |
| Sum of electronic and thermal Energies=      | -2579.238667                |
| Sum of electronic and thermal Enthalpies=    | -2579.237723                |
| Sum of electronic and thermal Free Energies= | -2579.364577                |

### B-3a

|    |              |              |              |
|----|--------------|--------------|--------------|
| 6  | 0.000009053  | 0.000034112  | -0.000012854 |
| 6  | -0.000010217 | 0.000000185  | 0.000023     |
| 7  | -0.000004087 | -0.000022834 | 0.000005497  |
| 7  | 0.000004554  | 0.000006082  | -0.000018058 |
| 16 | -0.000004835 | 0.000004122  | -0.000005646 |
| 8  | 0.000001979  | -0.00000119  | -0.000001041 |
| 8  | 0.000002955  | 0.000000721  | 0.000001708  |
| 6  | 0.000005853  | -0.000006298 | 0.000008548  |
| 6  | -0.00000293  | 0.000002273  | -0.000005856 |
| 6  | 0.000004109  | 0.000001981  | -0.000001483 |
| 6  | 0.000003095  | -0.000004026 | -0.000000422 |
| 6  | -0.000001157 | 0.000000331  | -0.000000918 |
| 6  | 0.000000838  | 0.00000286   | 0.00000147   |

|    |              |              |              |
|----|--------------|--------------|--------------|
| 1  | 0.000000175  | -0.000000214 | 0.000001844  |
| 1  | 0.000002045  | -0.000002359 | -0.000001046 |
| 1  | 0.000003042  | -0.000001518 | -0.000000913 |
| 1  | 0.000001596  | 0.000000121  | 0.000000061  |
| 6  | 0.000002804  | -0.00000246  | -0.000002856 |
| 1  | 0.000001903  | -0.000001413 | 0.000000053  |
| 1  | 0.000001745  | -0.000001148 | 0.000000975  |
| 1  | 0.000001333  | -0.000001299 | 0.000000052  |
| 6  | 0.000002075  | -0.000003093 | 0.000002829  |
| 6  | -0.000000962 | 0.000002416  | -0.000001441 |
| 1  | 0.000002659  | 0.00000147   | 0.00000275   |
| 1  | -0.000001307 | 0.000002331  | -0.000001239 |
| 6  | 0.000000008  | 0.000000064  | 0.000001384  |
| 1  | 0.000000747  | 0.000000413  | 0.000001689  |
| 1  | -0.000000845 | 0.000000374  | 0.000001037  |
| 6  | 0.000000679  | 0.000000936  | -0.000000034 |
| 1  | -0.000000411 | 0.000001253  | 0.000000584  |
| 1  | 0.000000165  | 0.000001068  | 0.000000079  |
| 1  | 0.000000023  | 0.000001228  | 0.000000564  |
| 1  | 0.000000604  | 0.000000634  | 0.000000555  |
| 1  | -0.000000325 | -0.000000059 | 0.000000302  |
| 6  | 0.000002838  | -0.000006867 | 0.000004436  |
| 6  | -0.000001539 | -0.000000094 | -0.000001138 |
| 1  | -0.000000338 | -0.000000664 | -0.000000933 |
| 1  | -0.000000092 | -0.000000402 | -0.000000954 |
| 6  | -0.000000556 | -0.000000248 | -0.000000712 |
| 1  | -0.000000407 | -0.000000496 | -0.000000536 |
| 1  | -0.000001343 | -0.000000282 | -0.000000456 |
| 6  | -0.000001452 | -0.000001532 | -0.0000012   |
| 1  | -0.000001123 | -0.000001501 | -0.000001153 |
| 1  | -0.000000621 | -0.000001252 | -0.000001011 |
| 1  | -0.000001393 | -0.000001311 | -0.000001353 |
| 1  | -0.000001252 | -0.000000593 | -0.000000799 |
| 1  | -0.000001905 | -0.000000855 | -0.000001104 |
| 16 | 0.000002742  | -0.000005305 | 0.000001169  |
| 8  | -0.000006994 | 0.00000339   | -0.000003437 |
| 8  | -0.000001219 | -0.000005282 | -0.000002358 |
| 6  | -0.000004015 | 0.00000481   | 0.00000335   |
| 6  | 0.000000009  | -0.000004213 | -0.000001341 |
| 6  | 0.000001063  | -0.00000175  | -0.000003661 |
| 6  | 0.000001262  | -0.000000852 | -0.000003386 |
| 1  | 0.000000626  | 0.000000378  | 0.00000003   |
| 6  | -0.00000141  | -0.000004296 | 0.000000358  |
| 1  | -0.000001157 | -0.000000995 | -0.000000475 |

|   |              |              |              |
|---|--------------|--------------|--------------|
| 6 | -0.00000108  | 0.0000018    | -0.000000112 |
| 1 | 0.000000965  | -0.000000774 | -0.000000313 |
| 1 | -0.000001173 | -0.000001671 | -0.000001849 |
| 6 | -0.000000488 | -0.00000099  | -0.000001529 |
| 1 | 0.000001171  | -0.000003802 | -0.000001936 |
| 1 | -0.000000807 | -0.000001754 | -0.000002453 |
| 1 | 0.000000676  | -0.000002181 | 0.000000259  |
| 1 | 0.000000264  | -0.000004626 | 0.000000875  |
| 8 | 0.000005227  | -0.000000982 | -0.000012337 |
| 6 | -0.000006159 | 0.000001824  | 0.000003147  |
| 6 | 0.000003063  | 0.00000298   | 0.000004983  |
| 6 | -0.000000903 | 0.000003656  | 0.000000107  |
| 6 | -0.000000321 | 0.000002974  | 0.000002739  |
| 6 | -0.000001031 | 0.000002631  | 0.000001698  |
| 6 | 0.000000742  | 0.000001783  | 0.000001559  |
| 6 | 0.000002672  | -0.000003092 | 0.000000995  |
| 6 | -0.000008276 | 0.00000281   | 0.000001832  |
| 1 | 0.00000011   | 0.000002383  | 0.000002157  |
| 1 | -0.000000421 | 0.00000264   | 0.000002253  |
| 1 | -0.000000983 | 0.000002303  | 0.000001589  |
| 1 | -0.000000904 | 0.000001596  | 0.000001237  |
| 1 | -0.000003732 | -0.00000043  | -0.000002589 |
| 1 | 0.000001974  | 0.000006085  | 0.000000703  |
| 7 | 0.000001822  | -0.000002926 | -0.000001742 |
| 1 | -0.000000342 | 0.000000335  | 0.000002002  |

|                                              |                             |
|----------------------------------------------|-----------------------------|
| Zero-point correction=                       | 0.679683 (Hartree/Particle) |
| Thermal correction to Energy=                | 0.722233                    |
| Thermal correction to Enthalpy=              | 0.723178                    |
| Thermal correction to Gibbs Free Energy=     | 0.598555                    |
| Sum of electronic and zero-point Energies=   | -2579.294753                |
| Sum of electronic and thermal Energies=      | -2579.252202                |
| Sum of electronic and thermal Enthalpies=    | -2579.251258                |
| Sum of electronic and thermal Free Energies= | -2579.375880                |

#### B-4a

|    |              |              |              |
|----|--------------|--------------|--------------|
| 6  | -0.000000611 | 0.000000079  | 0.000000644  |
| 6  | 0.000004486  | -0.000000864 | -0.000000512 |
| 7  | 0.000001778  | 0.000009148  | -0.000003632 |
| 7  | -0.000005742 | 0.000001107  | -0.000001128 |
| 16 | 0.000001263  | -0.000005747 | 0.000007651  |
| 8  | -0.000000719 | -0.00000003  | 0.000000899  |
| 8  | -0.000000689 | 0.000000252  | 0.000002681  |
| 6  | -0.000001139 | 0.00000215   | 0.000001253  |
| 6  | 0.000000831  | 0.000001947  | 0.000001066  |

|    |              |              |              |
|----|--------------|--------------|--------------|
| 6  | -0.000001835 | 0.000002256  | -0.000000094 |
| 6  | 0.000000894  | -0.000003385 | 0.000000398  |
| 6  | -0.000000378 | 0.000002067  | 0.000002736  |
| 6  | -0.000002911 | -0.000000428 | 0.000001105  |
| 1  | -0.000000744 | 0.000000063  | 0.000000599  |
| 1  | -0.000001182 | 0.000000076  | 0.000001794  |
| 1  | -0.000000502 | -0.000000821 | 0.000002916  |
| 1  | 0.000000036  | 0.000000019  | 0.000000214  |
| 6  | 0.000001307  | -0.000002257 | 0.000002302  |
| 1  | -0.000001503 | 0.000002154  | 0.000001486  |
| 1  | -0.000001447 | 0.000003185  | 0.000001483  |
| 1  | -0.000001863 | 0.000002308  | 0.000001304  |
| 6  | -0.000002547 | -0.000003332 | -0.000001061 |
| 6  | 0.000001486  | -0.000001175 | 0.000001697  |
| 1  | 0.000000497  | -0.000000217 | 0.000000708  |
| 1  | 0.000001167  | -0.000000638 | 0.000000524  |
| 6  | 0.000000976  | -0.000001427 | 0.000000962  |
| 1  | -0.000000049 | -0.000000388 | 0.000001136  |
| 1  | 0.000000007  | -0.000000626 | 0.000000708  |
| 6  | 0.000000995  | -0.00000182  | 0.000001761  |
| 1  | 0.000000849  | -0.000001564 | 0.000001068  |
| 1  | 0.000000885  | -0.000001406 | 0.000001612  |
| 1  | 0.000001121  | -0.000002028 | 0.0000018    |
| 1  | 0.000000645  | -0.000001459 | 0.00000208   |
| 1  | 0.000000842  | -0.000001665 | 0.000001452  |
| 6  | 0.000002341  | 0.000000399  | -0.000001603 |
| 6  | -0.000000757 | 0.000000407  | -0.000000293 |
| 1  | -0.000000082 | 0.000001119  | 0.000000014  |
| 1  | -0.000000063 | 0.000000015  | -0.000000642 |
| 6  | -0.000000675 | 0.000000578  | -0.000001909 |
| 1  | -0.000000733 | 0.000000501  | -0.000001407 |
| 1  | -0.000000369 | 0.000000142  | -0.000001989 |
| 6  | 0.000000083  | 0.000001745  | -0.00000249  |
| 1  | -0.000000456 | 0.000000084  | -0.000002035 |
| 1  | -0.000000448 | 0.000001079  | -0.000001578 |
| 1  | -0.000000638 | 0.000001202  | -0.0000027   |
| 1  | -0.000000517 | 0.000000788  | -0.000001855 |
| 1  | 0.000000002  | 0.00000104   | -0.000002561 |
| 16 | 0.00000371   | -0.000002455 | -0.000002253 |
| 8  | -0.000000545 | -0.000000508 | 0.000001393  |
| 8  | 0.000000328  | -0.000000474 | -0.000001026 |
| 6  | 0.000001085  | -0.000002109 | 0.000000064  |
| 6  | 0.000000311  | 0.000000578  | -0.000000182 |
| 6  | 0.000000187  | -0.000000336 | -0.000000994 |

|    |              |              |              |
|----|--------------|--------------|--------------|
| 6  | 0.000000216  | -0.000000165 | 0.000000485  |
| 1  | 0.000000498  | -0.000000295 | 0.000000858  |
| 6  | 0.000000393  | -0.000000813 | -0.000000456 |
| 1  | 0.000000851  | -0.000000975 | -0.000000834 |
| 6  | 0.000000198  | -0.000000815 | 0.000000095  |
| 1  | 0.000000042  | -0.000000167 | 0.000000705  |
| 1  | 0.000000691  | -0.000000794 | -0.000000463 |
| 6  | 0.000000507  | -0.000000257 | 0.000000806  |
| 1  | 0.00000003   | -0.000000265 | 0.000000449  |
| 1  | 0.000000031  | -0.000000898 | 0.000000315  |
| 1  | 0.000000036  | -0.000000736 | 0.000000813  |
| 1  | 0.000000004  | 0.000000256  | -0.000001067 |
| 8  | -0.000001038 | 0.000000703  | 0.000000036  |
| 6  | 0.000000444  | 0.000002079  | 0.000000053  |
| 6  | -0.00000109  | -0.000000312 | 0.000001049  |
| 6  | -0.000000124 | 0.000000546  | 0.000000557  |
| 6  | 0.000000029  | -0.000000278 | 0.000000351  |
| 6  | 0.000000152  | -0.000000587 | 0.000000508  |
| 6  | 0.00000009   | -0.000001113 | 0.000000177  |
| 6  | 0.000003906  | -0.000005004 | 0.000000249  |
| 6  | -0.000001903 | 0.000001718  | -0.000000867 |
| 1  | -0.000000561 | 0.000000046  | 0.000000058  |
| 1  | 0.000000218  | -0.000000035 | 0.000000091  |
| 1  | 0.000000652  | -0.000000868 | 0.000000617  |
| 1  | 0.000000257  | -0.000001031 | 0.000000013  |
| 1  | -0.000003783 | 0.000003228  | -0.000001158 |
| 1  | 0.000000054  | 0.000000966  | 0.000000199  |
| 7  | -0.000000001 | -0.000000229 | 0.000000342  |
| 1  | -0.000000885 | 0.000001035  | 0.000000088  |
| 7  | 0.000003575  | 0.000000207  | -0.000002197 |
| 16 | 0.000001392  | -0.00000101  | -0.000002689 |
| 8  | -0.000001154 | 0.000000222  | -0.000001597 |
| 8  | -0.000000247 | 0.000000285  | -0.000001314 |
| 16 | -0.000002038 | 0.000007856  | 0.000000139  |
| 8  | 0.000000271  | -0.00000359  | -0.000002836 |
| 8  | -0.000000655 | -0.000000021 | 0.000000136  |
| 6  | 0.000000151  | -0.000002541 | 0.000002877  |
| 6  | -0.000002385 | -0.000000026 | -0.000003189 |
| 9  | -0.000000015 | -0.000000026 | -0.000001348 |
| 9  | 0.000000599  | -0.000000506 | -0.000005166 |
| 9  | 0.000001497  | -0.000000654 | -0.000003394 |
| 9  | 0.000000786  | 0.000000422  | -0.000001257 |
| 9  | 0.000000179  | 0.000001153  | -0.000001015 |
| 9  | -0.000000234 | 0.000001916  | -0.000000815 |

|                                              |                             |
|----------------------------------------------|-----------------------------|
| Zero-point correction=                       | 0.733597 (Hartree/Particle) |
| Thermal correction to Energy=                | 0.792710                    |
| Thermal correction to Enthalpy=              | 0.793654                    |
| Thermal correction to Gibbs Free Energy=     | 0.629011                    |
| Sum of electronic and zero-point Energies=   | -4406.554442                |
| Sum of electronic and thermal Energies=      | -4406.495329                |
| Sum of electronic and thermal Enthalpies=    | -4406.494385                |
| Sum of electronic and thermal Free Energies= | -4406.659028                |

B-TSa4

|    |              |              |              |
|----|--------------|--------------|--------------|
| 6  | -0.000000416 | -0.000000277 | 0.00000081   |
| 6  | -0.000000041 | -0.000000726 | -0.000000375 |
| 7  | 0.000000434  | 0.000001015  | 0.000001431  |
| 7  | 0.000000002  | -0.000000303 | -0.000000955 |
| 16 | -0.000000005 | -0.000001045 | 0.000002062  |
| 8  | 0.000000018  | -0.000001372 | 0.000002137  |
| 8  | -0.000000006 | -0.000000071 | 0.000003298  |
| 6  | 0.000000506  | -0.000001225 | 0.000002408  |
| 6  | 0.000000545  | -0.000001047 | 0.000000573  |
| 6  | -0.000001185 | -0.000002152 | 0.00000042   |
| 6  | 0.000001214  | -0.000003407 | 0.000001486  |
| 6  | 0.000000193  | -0.000000789 | 0.00000059   |
| 6  | -0.000001241 | -0.000001065 | 0.000001943  |
| 1  | -0.000000198 | -0.000002442 | 0.000000479  |
| 1  | -0.000000293 | -0.000003152 | -0.00000041  |
| 1  | -0.000000118 | -0.000000994 | 0.000001249  |
| 1  | 0.000000083  | -0.000000212 | 0.000002346  |
| 6  | 0.000000161  | -0.000003344 | -0.000000662 |
| 1  | -0.000000596 | -0.000001758 | 0.000000869  |
| 1  | -0.000000446 | -0.000002919 | 0.000000283  |
| 1  | -0.000000272 | -0.000001676 | -0.000000826 |
| 6  | 0.000000349  | 0.000001352  | 0.000001687  |
| 6  | 0.000000154  | 0.000001819  | 0.000001528  |
| 1  | 0.000000118  | 0.000001444  | 0.000002721  |
| 1  | 0.000000252  | 0.000002033  | 0.000001336  |
| 6  | 0.000000399  | 0.000002977  | 0.00000207   |
| 1  | 0.000000171  | 0.000001487  | 0.000001951  |
| 1  | 0.000000204  | 0.000001845  | 0.000000837  |
| 6  | 0.000000321  | 0.00000035   | 0.000001812  |
| 1  | 0.000000299  | 0.000003452  | 0.000001541  |
| 1  | 0.0000004    | 0.000003066  | 0.000002782  |
| 1  | 0.000000394  | 0.000004374  | 0.000002075  |
| 1  | 0.00000032   | 0.000003105  | 0.000002316  |
| 1  | 0.00000031   | 0.00000352   | 0.00000097   |

|    |              |              |              |
|----|--------------|--------------|--------------|
| 6  | -0.00000053  | -0.000001137 | -0.000001992 |
| 6  | -0.000000227 | -0.000001287 | -0.000002563 |
| 1  | -0.000000107 | -0.000001515 | -0.000001659 |
| 1  | -0.000000237 | -0.000000606 | -0.000002554 |
| 6  | -0.000000286 | -0.000002313 | -0.000003444 |
| 1  | -0.000000268 | -0.000001702 | -0.000001785 |
| 1  | 0.000000049  | -0.000000581 | -0.000002954 |
| 6  | -0.000000383 | -0.000002556 | -0.000003933 |
| 1  | -0.00000032  | -0.000001769 | -0.000004004 |
| 1  | -0.000000313 | -0.000002828 | -0.000003009 |
| 1  | -0.000000396 | -0.000003064 | -0.000004463 |
| 1  | -0.000000274 | -0.000002775 | -0.000003375 |
| 1  | -0.000000327 | -0.000001886 | -0.000004253 |
| 16 | 0.00000027   | 0.000000892  | -0.000001633 |
| 8  | -0.000000124 | 0.000001649  | -0.000000683 |
| 8  | 0.000000091  | 0.000001216  | -0.000002458 |
| 6  | -0.000000008 | 0.000001133  | -0.000001811 |
| 6  | -0.000000121 | 0.000000776  | -0.00000116  |
| 6  | -0.000000169 | 0.000001199  | -0.000002814 |
| 6  | 0.000000026  | -0.000000047 | -0.000000357 |
| 1  | 0.000000092  | 0.000000397  | -0.00000013  |
| 6  | -0.000000138 | 0.000001922  | -0.000004143 |
| 1  | 0.000000026  | 0.000001676  | -0.000003307 |
| 6  | -0.000000035 | 0.000001087  | -0.000001922 |
| 1  | -0.000000014 | 0.000000609  | -0.000000815 |
| 1  | 0.000000007  | 0.000001694  | -0.000003674 |
| 6  | 0.000000066  | 0.000000092  | -0.000002435 |
| 1  | -0.000000164 | 0.000001201  | -0.000002545 |
| 1  | 0.000000062  | 0.000000964  | -0.00000249  |
| 1  | 0            | 0.000000975  | -0.000002827 |
| 1  | 0.000000214  | 0.000001032  | 0.00000046   |
| 8  | -0.000000245 | -0.00000174  | -0.000000043 |
| 6  | 0.000000402  | 0.00000038   | 0.00000204   |
| 6  | 0.000000126  | -0.0000006   | 0.000002507  |
| 6  | 0.000000105  | -0.000000223 | 0.000003742  |
| 6  | 0.000000183  | 0.000000756  | 0.000003875  |
| 6  | 0.000000219  | 0.000001538  | 0.000003327  |
| 6  | 0.000000228  | 0.00000116   | 0.000002614  |
| 6  | 0.000001468  | -0.000002383 | -0.000000228 |
| 6  | 0.000000145  | -0.000001233 | 0.000002102  |
| 1  | 0.000000126  | -0.00000083  | 0.000004147  |
| 1  | 0.000000259  | 0.000001054  | 0.000004609  |
| 1  | 0.000000361  | 0.000002364  | 0.000003522  |
| 1  | 0.000000279  | 0.000001853  | 0.00000195   |

|    |              |              |              |
|----|--------------|--------------|--------------|
| 1  | -0.000000027 | 0.000000336  | 0.000000674  |
| 1  | 0.000000195  | -0.000002458 | 0.00000109   |
| 7  | -0.000000398 | -0.000001379 | 0.000002424  |
| 1  | 0.000000154  | -0.000002289 | 0.000002683  |
| 7  | -0.000002302 | -0.000000526 | 0.000000552  |
| 16 | 0.000000621  | 0.000002348  | -0.000000271 |
| 8  | -0.000000187 | 0.000001516  | -0.000000811 |
| 8  | -0.000000156 | 0.000001953  | 0.000000474  |
| 16 | 0.000000373  | -0.000000153 | -0.000000977 |
| 8  | 0.000000474  | -0.000000832 | -0.000000667 |
| 8  | -0.000000467 | -0.000001374 | -0.000000034 |
| 6  | -0.000000157 | 0.000001415  | -0.000001894 |
| 6  | -0.000000005 | -0.000001337 | 0.000000452  |
| 9  | -0.000001584 | 0.000000469  | -0.000000379 |
| 9  | 0.000000658  | 0.000002282  | -0.000002053 |
| 9  | 0.000000331  | 0.000001145  | -0.00000148  |
| 9  | -0.000000191 | -0.000000139 | -0.000000098 |
| 9  | -0.000000013 | -0.000000966 | 0.00000171   |
| 9  | 0.000000015  | -0.000002395 | 0.000000107  |

Zero-point correction=

0.728810 (Hartree/Particle)

Thermal correction to Energy=

0.787702

Thermal correction to Enthalpy=

0.788646

Thermal correction to Gibbs Free Energy=

0.623381

Sum of electronic and zero-point Energies=

-4406.552228

Sum of electronic and thermal Energies=

-4406.493336

Sum of electronic and thermal Enthalpies=

-4406.492392

Sum of electronic and thermal Free Energies=

-4406.657656

B-5a

|    |              |              |              |
|----|--------------|--------------|--------------|
| 6  | -0.000013308 | 0.000001096  | 0.000009265  |
| 6  | 0.000006527  | -0.000004579 | -0.000015051 |
| 7  | 0.000006303  | 0.000020822  | -0.000017725 |
| 7  | -0.000005546 | 0.000002365  | -0.000006771 |
| 16 | 0.000004584  | -0.000012067 | 0.000018085  |
| 8  | -0.000001304 | 0.00000046   | -0.000000069 |
| 8  | -0.000000762 | 0.000000054  | -0.000000824 |
| 6  | -0.000000485 | -0.000000088 | -0.000001397 |
| 6  | -0.000000518 | -0.000000729 | 0.000000062  |
| 6  | -0.000001597 | -0.000001603 | 0.000000119  |
| 6  | 0.00000141   | -0.000000368 | 0.000000062  |
| 6  | -0.000000218 | 0.000000212  | 0.000001562  |
| 6  | -0.000002046 | -0.000003125 | 0.000000943  |
| 1  | 0.000000622  | 0.000000485  | 0.000000893  |
| 1  | -0.000000246 | -0.000000838 | 0.000000723  |



|    |              |              |              |
|----|--------------|--------------|--------------|
| 1  | -0.00000681  | -0.000002018 | 0.000001247  |
| 1  | -0.000001328 | 0.000000051  | 0.000001197  |
| 6  | -0.0000002   | -0.000001558 | 0.000001387  |
| 1  | -0.000000398 | -0.000001867 | 0.000001616  |
| 1  | -0.000000152 | -0.000001956 | 0.000001649  |
| 1  | -0.000000682 | -0.000001816 | 0.000001527  |
| 6  | -0.000004827 | -0.000009021 | -0.000004706 |
| 6  | 0.000001992  | 0.000000218  | 0.000004355  |
| 1  | -0.000000883 | 0.000000573  | -0.000000638 |
| 1  | 0.000002218  | 0.000000995  | -0.00000018  |
| 6  | -0.000000352 | -0.000000785 | -0.00000204  |
| 1  | -0.000000632 | -0.000000663 | -0.000000699 |
| 1  | -0.000001333 | 0.000000069  | -0.000000595 |
| 6  | 0.00000104   | -0.000000141 | 0.000000546  |
| 1  | 0.000000498  | 0.000000542  | 0.000000015  |
| 1  | -0.000000015 | 0.000000015  | 0.000000366  |
| 1  | 0.000000229  | -0.000000004 | 0.000000016  |
| 1  | -0.000000173 | -0.000000802 | 0.000000759  |
| 1  | 0.000000778  | -0.000000085 | 0.000000132  |
| 6  | 0.000002913  | 0.000002574  | 0.000002512  |
| 6  | 0.00000068   | 0.000002773  | 0.000000541  |
| 1  | -0.000001124 | 0.000000259  | -0.000001212 |
| 1  | 0.000001351  | -0.000001094 | -0.000000036 |
| 6  | 0.000000018  | -0.000001614 | 0.000000536  |
| 1  | 0.00000061   | -0.000000608 | 0.000000239  |
| 1  | 0.000001142  | 0.000000719  | -0.000000078 |
| 6  | 0.000002074  | -0.000006017 | -0.000005969 |
| 1  | 0.000001653  | 0.000000843  | 0.000001116  |
| 1  | 0.000000364  | 0.000000095  | -0.000000956 |
| 1  | 0.000000997  | 0.00000141   | -0.000000972 |
| 1  | -0.000001175 | 0.000000391  | 0.0000007319 |
| 1  | 0.00000123   | 0.000001075  | -0.000000033 |
| 16 | 0.000006592  | 0.000000916  | 0.000000411  |
| 8  | -0.00000307  | -0.00000246  | -0.000000079 |
| 8  | -0.000000701 | 0.000000536  | 0.000002027  |
| 6  | 0.000003954  | -0.00000979  | 0.00000468   |
| 6  | 0.000000052  | 0.000003335  | -0.000000034 |
| 6  | 0.000000756  | 0.000003932  | -0.000001969 |
| 6  | 0.000002468  | -0.000000105 | -0.000000087 |
| 1  | 0.000000846  | 0.000000182  | 0.000001595  |
| 6  | 0.000000545  | -0.000000762 | 0.000002266  |
| 1  | 0.000002549  | -0.000000345 | 0.000001302  |
| 6  | 0.000001277  | -0.000002209 | 0.000001133  |
| 1  | 0.000000641  | -0.000001271 | 0.000002154  |

|                                                   |              |              |                                    |
|---------------------------------------------------|--------------|--------------|------------------------------------|
| 1                                                 | 0.000001971  | -0.00000033  | 0.000001221                        |
| 6                                                 | 0.000001744  | -0.00000242  | 0.000001164                        |
| 1                                                 | 0.000001366  | -0.00000024  | 0.000001685                        |
| 1                                                 | 0.000001799  | -0.000001307 | 0.000001358                        |
| 1                                                 | 0.000000809  | -0.000001532 | 0.000002537                        |
| 1                                                 | 0.000000549  | -0.000000177 | -0.000002378                       |
| 8                                                 | -0.000003333 | -0.000000337 | 0.000011986                        |
| 6                                                 | -0.00000259  | 0.000000156  | -0.000002568                       |
| 6                                                 | -0.000000362 | 0.000004611  | -0.000004135                       |
| 6                                                 | -0.000000099 | 0.000000325  | -0.000001401                       |
| 6                                                 | 0.000000091  | 0.000002483  | -0.000001941                       |
| 6                                                 | -0.000000166 | 0.000001073  | -0.000000772                       |
| 6                                                 | -0.000000182 | 0.000002401  | -0.000000137                       |
| 6                                                 | 0.000004019  | 0.000003952  | -0.000005096                       |
| 6                                                 | -0.000005683 | 0.000000465  | 0.000003267                        |
| 1                                                 | -0.000000341 | 0.000001762  | -0.000001582                       |
| 1                                                 | 0.000000285  | 0.000001899  | -0.000002004                       |
| 1                                                 | 0.000000771  | 0.000001772  | -0.000001198                       |
| 1                                                 | -0.000000028 | 0.000000279  | -0.000000431                       |
| 1                                                 | 0.000005566  | -0.000006579 | -0.000007557                       |
| 1                                                 | -0.000003023 | 0.000000416  | -0.000002664                       |
| 7                                                 | 0.000006537  | -0.000008623 | -0.000001848                       |
| 1                                                 | -0.00000303  | 0.000006901  | 0.000000781                        |
| 7                                                 | -0.000015792 | 0.000012395  | 0.000005242                        |
| 16                                                | -0.000007654 | 0.00000216   | -0.000000058                       |
| 8                                                 | -0.000001254 | 0.000005738  | -0.000002741                       |
| 8                                                 | -0.000000428 | -0.000000813 | 0.000001035                        |
| 16                                                | 0.000013568  | 0.00000549   | 0.000000064                        |
| 8                                                 | -0.000003169 | -0.000002381 | 0.000000272                        |
| 8                                                 | -0.000003314 | -0.000003003 | -0.000003416                       |
| 6                                                 | 0.00000165   | 0.00000412   | 0.000006571                        |
| 6                                                 | 0.000015032  | 0.000009334  | 0.000000987                        |
| 9                                                 | 0.000002247  | -0.000004517 | -0.000000513                       |
| 9                                                 | -0.000008288 | -0.000007452 | -0.000004044                       |
| 9                                                 | 0.0000033    | -0.000003844 | -0.000000064                       |
| 9                                                 | -0.000005988 | -0.000005274 | -0.00000354                        |
| 9                                                 | -0.000001865 | 0.000000813  | -0.000002633                       |
| 9                                                 | -0.000009737 | 0.000000155  | -0.000000091                       |
| <b>Zero-point correction=</b>                     |              |              | <b>0.733773 (Hartree/Particle)</b> |
| <b>Thermal correction to Energy=</b>              |              |              | <b>0.793345</b>                    |
| <b>Thermal correction to Enthalpy=</b>            |              |              | <b>0.794290</b>                    |
| <b>Thermal correction to Gibbs Free Energy=</b>   |              |              | <b>0.627505</b>                    |
| <b>Sum of electronic and zero-point Energies=</b> |              |              | <b>-4406.581735</b>                |
| <b>Sum of electronic and thermal Energies=</b>    |              |              | <b>-4406.522163</b>                |

Sum of electronic and thermal Enthalpies= -4406.521219  
Sum of electronic and thermal Free Energies= -4406.688004

B-TSb11

|    |              |              |              |
|----|--------------|--------------|--------------|
| 6  | -0.00001899  | 0.00000415   | 0.000003268  |
| 6  | -0.00000774  | -0.000010838 | -0.000006916 |
| 7  | -0.00002418  | 0.000002169  | 0.000004149  |
| 7  | -0.00001131  | 0.00001293   | 0.000000342  |
| 16 | -0.00000621  | 0.000003009  | 0.000001085  |
| 8  | 0.00001859   | 0.000000455  | 0.000001206  |
| 8  | 0.00000585   | 0.000001782  | 0.00000144   |
| 6  | 0.000001     | 0.000000847  | 0.000001029  |
| 6  | 0.00000466   | 0.000000612  | 0.000001169  |
| 6  | -0.00000006  | 0.000000259  | 0.00000193   |
| 6  | -0.00000456  | 0.000003413  | 0.000000823  |
| 6  | 0.000001121  | 0.000001578  | 0.000001316  |
| 6  | -0.00000117  | 0.000002052  | 0.000001293  |
| 1  | 0.000001128  | 0.000000546  | 0.000001404  |
| 1  | 0.000001017  | 0.000001028  | 0.000001573  |
| 1  | 0.000000333  | 0.000003504  | 0.000002213  |
| 1  | 0.000000155  | 0.000002903  | 0.00000177   |
| 6  | 0.000001403  | 0.00000175   | 0.000002564  |
| 1  | 0.000000196  | 0.000000717  | 0.000002213  |
| 1  | 0.000001235  | 0.000002401  | 0.000001646  |
| 1  | 0.000001446  | 0.000001715  | 0.000002966  |
| 6  | -0.000000545 | 0.000001036  | -0.000000156 |
| 6  | -0.000001254 | 0.000001811  | -0.000000264 |
| 1  | -0.000001037 | 0.00000168   | -0.000000279 |
| 1  | -0.000000743 | 0.000002746  | 0.000000495  |
| 6  | -0.00000202  | 0.000002311  | -0.000000589 |
| 1  | -0.000001603 | 0.00000158   | -0.000000866 |
| 1  | -0.000001775 | 0.000002234  | -0.000000465 |
| 6  | -0.000002534 | 0.000002708  | -0.000001204 |
| 1  | -0.000001831 | 0.000003236  | -0.000000363 |
| 1  | -0.00000221  | 0.000002423  | -0.000000934 |
| 1  | -0.000002975 | 0.000003112  | -0.000001333 |
| 1  | -0.000002621 | 0.000002296  | -0.00000172  |
| 1  | -0.000002685 | 0.000002922  | -0.000001144 |
| 6  | 0.000000888  | -0.000004658 | 0.000001505  |
| 6  | 0.000001775  | 0.000003019  | 0.000001794  |
| 1  | 0.000000251  | -0.000001783 | 0.000000049  |
| 1  | 0.000001164  | -0.000002024 | -0.000000446 |
| 6  | 0.000001879  | -0.000002618 | 0.000000671  |
| 1  | 0.00000024   | -0.000000793 | 0.000000321  |

|                                 |              |              |                             |
|---------------------------------|--------------|--------------|-----------------------------|
| 1                               | 0.000001512  | -0.000006325 | 0.00000078                  |
| 6                               | 0.000002265  | -0.000001724 | 0.000001346                 |
| 1                               | 0.000001833  | -0.000001912 | 0.000000944                 |
| 1                               | 0.000001776  | -0.000002513 | 0.000000315                 |
| 1                               | 0.000002691  | -0.000002288 | 0.000001593                 |
| 1                               | 0.000002003  | -0.00000171  | 0.0000012                   |
| 1                               | 0.000002153  | -0.000001342 | 0.000001856                 |
| 16                              | -0.000000268 | -0.000001172 | -0.000003376                |
| 8                               | -0.000000549 | -0.000000475 | -0.000001145                |
| 8                               | 0.00000037   | -0.000001491 | -0.000000973                |
| 6                               | -0.000000979 | -0.000001751 | -0.000001645                |
| 6                               | -0.000000945 | -0.000001664 | -0.000001975                |
| 6                               | -0.000000465 | -0.000002152 | -0.000001926                |
| 6                               | -0.000001155 | -0.000001722 | -0.000002283                |
| 1                               | -0.000001228 | -0.000000623 | -0.000001885                |
| 6                               | -0.000000577 | -0.000002893 | -0.000002045                |
| 1                               | -0.000000057 | -0.000002562 | -0.00000185                 |
| 6                               | -0.000000801 | -0.000002681 | -0.000002668                |
| 1                               | -0.000001233 | -0.000001553 | -0.00000258                 |
| 1                               | -0.000000169 | -0.000003544 | -0.000002452                |
| 6                               | -0.000001392 | -0.000003194 | -0.000002907                |
| 1                               | -0.00000123  | -0.000003157 | -0.000003581                |
| 1                               | -0.000000921 | -0.000002831 | -0.000002691                |
| 1                               | -0.00000043  | -0.00000363  | -0.000003011                |
| 1                               | -0.000000405 | -0.000000051 | -0.000001035                |
| 6                               | 0.000000296  | -0.000001023 | 0.000000777                 |
| 6                               | 0.000000209  | 0.000000491  | -0.000001137                |
| 6                               | 0.000000402  | -0.000001417 | 0.00000045                  |
| 6                               | 0.000001068  | -0.000001362 | 0.000001203                 |
| 6                               | 0.00000137   | -0.000001268 | 0.000002066                 |
| 6                               | -0.000000003 | 0.000000521  | 0.000001604                 |
| 6                               | 0.000003325  | -0.000002183 | -0.000000899                |
| 6                               | -0.000000691 | 0.000003852  | -0.000002932                |
| 1                               | 0.000000648  | -0.000001292 | -0.000000235                |
| 1                               | 0.000001695  | -0.000001574 | 0.000000865                 |
| 1                               | 0.000002207  | -0.000000507 | 0.000001305                 |
| 1                               | 0.000001145  | 0.000003035  | 0.000000836                 |
| 1                               | 0.000001155  | 0.000000366  | 0.000003025                 |
| 1                               | -0.000000807 | 0.000000937  | -0.000000191                |
| 7                               | -0.000000426 | -0.000002647 | 0.000003877                 |
| 1                               | -0.000000219 | 0.000000811  | -0.000002177                |
| Zero-point correction=          |              |              | 0.669157 (Hartree/Particle) |
| Thermal correction to Energy=   |              |              | 0.712137                    |
| Thermal correction to Enthalpy= |              |              | 0.713081                    |

|                                              |              |
|----------------------------------------------|--------------|
| Thermal correction to Gibbs Free Energy=     | 0.586630     |
| Sum of electronic and zero-point Energies=   | -2504.017908 |
| Sum of electronic and thermal Energies=      | -2503.974928 |
| Sum of electronic and thermal Enthalpies=    | -2503.973984 |
| Sum of electronic and thermal Free Energies= | -2504.100435 |

B-11b

|    |              |              |              |
|----|--------------|--------------|--------------|
| 6  | -0.000003265 | 0.000000477  | 0.000000419  |
| 6  | 0.000003028  | 0.000006753  | 0.000001513  |
| 7  | 0.000001824  | -0.000003942 | 0.000005313  |
| 7  | 0.000000415  | -0.000016778 | 0.000000213  |
| 16 | -0.000005024 | -0.000003502 | -0.000000197 |
| 8  | 0.000000736  | 0.000000091  | -0.000001127 |
| 8  | -0.000001649 | -0.000001747 | 0.000001006  |
| 6  | 0.000002742  | -0.000001179 | 0.000000467  |
| 6  | -0.000001143 | -0.000003063 | -0.000000455 |
| 6  | 0.000000911  | -0.000000008 | 0.000000864  |
| 6  | 0.00000117   | 0.000001665  | 0.00000122   |
| 6  | 0.000000195  | -0.000001292 | 0.000001717  |
| 6  | -0.000003325 | 0.000001754  | 0.000000061  |
| 1  | -0.000000782 | -0.000001563 | 0.000001919  |
| 1  | 0.000000892  | -0.000003391 | 0.000000981  |
| 1  | 0.000000692  | -0.000004222 | 0.000002071  |
| 1  | 0.00000095   | -0.000004046 | 0.000001527  |
| 6  | 0.000003453  | -0.000009028 | 0.000003107  |
| 1  | 0.000000299  | -0.000000909 | 0.000000731  |
| 1  | 0.000000272  | -0.0000003   | 0.000001326  |
| 1  | -0.000001524 | -0.000000344 | 0.000002839  |
| 6  | -0.000000337 | 0.000003969  | 0.000001941  |
| 6  | -0.000000735 | -0.000002307 | -0.000003569 |
| 1  | 0.00000075   | -0.00000192  | 0.000001065  |
| 1  | -0.000002183 | -0.00000212  | 0.000000441  |
| 6  | 0.000000561  | 0.000001103  | 0.000003545  |
| 1  | 0.000002447  | -0.000001128 | -0.000000075 |
| 1  | 0.000000057  | -0.000000286 | 0.0000017    |
| 6  | 0.0000007    | -0.000001581 | -0.000000086 |
| 1  | -0.00000039  | -0.000001476 | 0.000000637  |
| 1  | 0.000000432  | -0.000001165 | 0.000000663  |
| 1  | 0.000000521  | -0.000001063 | 0.000000929  |
| 1  | 0.000000527  | -0.000000645 | 0.000000657  |
| 1  | -0.000000533 | -0.000000389 | 0.000001214  |
| 6  | -0.000000526 | 0.000003003  | -0.000003157 |
| 6  | -0.000002471 | -0.000002223 | -0.000005704 |
| 1  | 0.000002553  | 0.000000923  | -0.000001174 |

|    |              |              |              |
|----|--------------|--------------|--------------|
| 1  | 0.000001449  | -0.00000055  | -0.000000537 |
| 6  | -0.000000857 | 0.00000243   | 0.000002245  |
| 1  | -0.000000567 | 0.000002737  | -0.000001004 |
| 1  | 0.000004038  | 0.000000142  | 0.000007832  |
| 6  | -0.00000032  | -0.000001112 | 0.000000078  |
| 1  | -0.000000055 | 0.000000865  | -0.000001127 |
| 1  | 0.000000475  | -0.000000099 | -0.000000221 |
| 1  | 0.000000223  | 0.000000715  | -0.000000359 |
| 1  | -0.000000994 | 0.000000731  | -0.000000889 |
| 1  | -0.000001524 | 0.000001176  | -0.000000964 |
| 16 | -0.000006026 | 0.000012103  | 0.000001815  |
| 8  | 0.000002905  | -0.000000659 | -0.000001168 |
| 8  | 0.00000018   | 0.000001598  | -0.00000183  |
| 6  | 0.000001292  | 0.000000596  | 0.000003906  |
| 6  | 0.000000426  | 0.000002054  | -0.000000007 |
| 6  | 0.000004297  | 0.000000253  | -0.000001288 |
| 6  | 0.000001937  | 0.000002492  | -0.000002285 |
| 1  | 0.000000007  | 0.000000185  | -0.000000849 |
| 6  | 0.000000206  | -0.000000921 | -0.000000913 |
| 1  | 0.000000029  | 0.000004079  | -0.000002205 |
| 6  | 0.000002942  | 0.000001816  | 0.000002227  |
| 1  | 0.000002045  | 0.000000501  | 0.000000235  |
| 1  | 0.000002961  | 0.000001411  | -0.000000589 |
| 6  | 0.000003885  | 0.000000616  | -0.000000898 |
| 1  | 0.000003144  | 0.000000667  | 0.000000558  |
| 1  | 0.000003069  | 0.000000584  | 0.000000455  |
| 1  | 0.000003426  | 0.000001     | 0.000000222  |
| 1  | -0.000000416 | -0.000002901 | -0.000001239 |
| 6  | -0.000000084 | 0.000000555  | -0.000004507 |
| 6  | -0.00000056  | 0.000000343  | -0.000000358 |
| 6  | -0.000002541 | -0.00000042  | -0.000001719 |
| 6  | -0.000003381 | 0.00000078   | -0.000001314 |
| 6  | -0.000001719 | 0.000001969  | -0.000001821 |
| 6  | -0.000003617 | 0.000003073  | -0.00000167  |
| 6  | -0.000001785 | 0.000002652  | -0.000006178 |
| 6  | -0.0000003   | -0.000000399 | 0.000005209  |
| 1  | -0.000002308 | 0.00000239   | -0.000001673 |
| 1  | -0.000002861 | 0.000001449  | -0.000001726 |
| 1  | -0.000002502 | 0.000000811  | -0.00000142  |
| 1  | -0.000001789 | 0.000000666  | -0.00000367  |
| 1  | -0.000003707 | 0.000001848  | 0.000001229  |
| 1  | -0.000000157 | 0.000000928  | -0.000001993 |
| 7  | -0.000002232 | 0.000002045  | -0.00000398  |
| 1  | -0.000000874 | 0.000000681  | -0.000000155 |

|                                              |                             |
|----------------------------------------------|-----------------------------|
| Zero-point correction=                       | 0.673707 (Hartree/Particle) |
| Thermal correction to Energy=                | 0.715633                    |
| Thermal correction to Enthalpy=              | 0.716577                    |
| Thermal correction to Gibbs Free Energy=     | 0.591814                    |
| Sum of electronic and zero-point Energies=   | -2504.056666                |
| Sum of electronic and thermal Energies=      | -2504.014740                |
| Sum of electronic and thermal Enthalpies=    | -2504.013796                |
| Sum of electronic and thermal Free Energies= | -2504.138558                |

B-TSb1

|    |              |              |              |
|----|--------------|--------------|--------------|
| 6  | -0.000000579 | -0.000000702 | -0.000000733 |
| 6  | -0.000000387 | 0.000001993  | 0.000003381  |
| 7  | 0.000000919  | 0.000000429  | -0.000000679 |
| 7  | -0.000000424 | -0.000000808 | -0.000001526 |
| 16 | -0.000000267 | -0.000000193 | 0.000000171  |
| 8  | -0.000000003 | 0.000001244  | 0.000000842  |
| 8  | -0.000000385 | 0.000000156  | 0.000000272  |
| 6  | 0.000000733  | -0.000001082 | -0.000000553 |
| 6  | 0.000000017  | -0.000000385 | 0.000000274  |
| 6  | 0.000000366  | -0.000000861 | 0.000000444  |
| 6  | 0.000000811  | -0.000000088 | -0.000000282 |
| 6  | 0.000000125  | -0.000000703 | -0.000000131 |
| 6  | -0.000000016 | -0.000000517 | 0.000000003  |
| 1  | 0.000000703  | -0.000000748 | 0.000000502  |
| 1  | 0.000000535  | -0.000000912 | 0.000000402  |
| 1  | 0.000000276  | -0.000000044 | 0.000000184  |
| 1  | 0.000000151  | -0.000000047 | 0.000000144  |
| 6  | 0.000000588  | -0.000001196 | 0.000000275  |
| 1  | 0.000000452  | -0.000000985 | 0.000000547  |
| 1  | 0.000000068  | -0.000001213 | 0.000000564  |
| 1  | 0.000000591  | -0.000001337 | 0.000000163  |
| 6  | -0.000000529 | 0.000000053  | 0.000000131  |
| 6  | -0.000000404 | -0.000000299 | -0.000001269 |
| 1  | -0.000000145 | -0.000000743 | -0.000000869 |
| 1  | -0.000000047 | -0.000000036 | -0.000000052 |
| 6  | -0.000000512 | -0.000000151 | -0.000000862 |
| 1  | -0.000000506 | 0.000000033  | -0.000000944 |
| 1  | -0.000000389 | -0.000000336 | -0.000000915 |
| 6  | -0.000000397 | -0.000000019 | -0.000001544 |
| 1  | -0.000000438 | -0.000000218 | -0.000001067 |
| 1  | -0.000000505 | -0.000000411 | -0.000001198 |
| 1  | -0.000000784 | -0.000000113 | -0.000001632 |
| 1  | -0.000000881 | 0.000000157  | -0.000001557 |
| 1  | -0.000000795 | 0.000000329  | -0.000001297 |

|    |              |              |              |
|----|--------------|--------------|--------------|
| 6  | 0.000000113  | 0.000000338  | 0.000000807  |
| 6  | -0.000000477 | 0.000000884  | -0.000000611 |
| 1  | 0.000000259  | 0.000000406  | 0.000000501  |
| 1  | -0.000000114 | 0.000000258  | 0.000000757  |
| 6  | -0.000000297 | 0.000000086  | 0.000000387  |
| 1  | -0.000000813 | 0.000000257  | -0.000000015 |
| 1  | -0.000000256 | 0.000000729  | -0.000000063 |
| 6  | -0.000000391 | 0.000001269  | -0.000000254 |
| 1  | -0.000000354 | 0.000000928  | 0.000000023  |
| 1  | -0.000000163 | 0.000001077  | 0.000000345  |
| 1  | -0.000000491 | 0.000001507  | 0.000000088  |
| 1  | -0.000000537 | 0.000001266  | 0.000000056  |
| 1  | -0.000000549 | 0.000001249  | -0.000000027 |
| 16 | 0.000001488  | -0.000000306 | 0.000001227  |
| 8  | -0.000000893 | -0.000001301 | 0.000000079  |
| 8  | 0.000000329  | 0.000000421  | -0.000000084 |
| 6  | 0.000000079  | -0.000000168 | 0.000000395  |
| 6  | 0.000000326  | -0.000000625 | 0.000000414  |
| 6  | 0.000001024  | -0.000000187 | 0.000001241  |
| 6  | 0.000000244  | 0.000000503  | 0.000000734  |
| 1  | -0.000000092 | 0.000000002  | 0.000000028  |
| 6  | 0.000000161  | 0.000000325  | 0.000000925  |
| 1  | 0.000000037  | -0.000000057 | 0.000000366  |
| 6  | 0.000001562  | -0.000000095 | 0.000002099  |
| 1  | 0.000000281  | 0.000000212  | 0.000001234  |
| 1  | 0.000000615  | 0.000000439  | 0.000001395  |
| 6  | 0.000001283  | 0.000000784  | 0.000001871  |
| 1  | 0.000000701  | 0.000000139  | 0.000001691  |
| 1  | 0.000000531  | -0.000000537 | 0.000001658  |
| 1  | -0.000000012 | 0.000000937  | 0.000001094  |
| 1  | -0.000000459 | -0.000000063 | -0.000000802 |
| 6  | 0.000000159  | 0.000000156  | -0.000000688 |
| 6  | -0.000000069 | -0.000000517 | -0.000001359 |
| 6  | -0.000000014 | 0.000000083  | 0.000000269  |
| 6  | -0.000000677 | 0.000000047  | -0.000000009 |
| 6  | -0.000000206 | 0.000000505  | -0.000000087 |
| 6  | 0.000000575  | 0.000000096  | -0.000000007 |
| 6  | -0.000001436 | -0.000000058 | -0.000002237 |
| 6  | 0.000001206  | -0.000000056 | -0.000001975 |
| 1  | 0.000000172  | 0.000000093  | 0.000000114  |
| 1  | -0.000000141 | 0.000000552  | 0.000000022  |
| 1  | -0.000000399 | 0.000000703  | -0.000000327 |
| 1  | -0.000000338 | 0.000000557  | -0.000000032 |
| 1  | -0.000000092 | 0.000000078  | -0.000000626 |



|                                              |             |              |                             |
|----------------------------------------------|-------------|--------------|-----------------------------|
| 1                                            | 0.00000071  | -0.00000488  | -0.00000684                 |
| 7                                            | 0.00000491  | -0.00000153  | 0.000001                    |
| 1                                            | -0.00000404 | -0.000000803 | 0.000000133                 |
| Zero-point correction=                       |             |              | 0.671310 (Hartree/Particle) |
| Thermal correction to Energy=                |             |              | 0.713610                    |
| Thermal correction to Enthalpy=              |             |              | 0.714554                    |
| Thermal correction to Gibbs Free Energy=     |             |              | 0.590612                    |
| Sum of electronic and zero-point Energies=   |             |              | -2504.023180                |
| Sum of electronic and thermal Energies=      |             |              | -2503.980881                |
| Sum of electronic and thermal Enthalpies=    |             |              | -2503.979937                |
| Sum of electronic and thermal Free Energies= |             |              | -2504.103878                |

#### B-1b

|    |              |              |              |
|----|--------------|--------------|--------------|
| 6  | 0.000002732  | 0.000004776  | 0.00000201   |
| 6  | 0.000001104  | -0.000013732 | 0.000007185  |
| 7  | -0.000000991 | 0.000000367  | -0.00000036  |
| 7  | -0.000000123 | 0.000010602  | -0.000004856 |
| 16 | -0.000007762 | -0.000006293 | -0.000001149 |
| 8  | 0.000003134  | -0.000005264 | 0.000000284  |
| 8  | 0.000001123  | -0.000001435 | -0.000000451 |
| 6  | 0.000002704  | -0.000000626 | -0.000001393 |
| 6  | 0.000001648  | -0.000002282 | -0.000000034 |
| 6  | 0.000000236  | -0.000002118 | -0.000000838 |
| 6  | 0.000000908  | -0.000002913 | -0.000001124 |
| 6  | 0.000000251  | -0.000003676 | 0.000000175  |
| 6  | -0.00000048  | -0.000003086 | 0.000000255  |
| 1  | 0.000001614  | -0.000001682 | -0.000000663 |
| 1  | 0.00000155   | -0.000001846 | -0.000000805 |
| 1  | -0.00000041  | -0.000004139 | -0.000000034 |
| 1  | -0.000000943 | -0.000003094 | -0.000000591 |
| 6  | 0.000000828  | -0.000003409 | -0.000000888 |
| 1  | 0.000000546  | -0.000004118 | -0.000000093 |
| 1  | 0.000001553  | -0.000003201 | -0.000001179 |
| 1  | 0.00000036   | -0.00000291  | -0.000000712 |
| 6  | -0.000003323 | -0.000001844 | -0.000001127 |
| 6  | -0.00000264  | 0.000000258  | 0.000000014  |
| 1  | -0.000002876 | -0.000000901 | 0.000000634  |
| 1  | -0.000001478 | -0.000002068 | 0.000003411  |
| 6  | -0.000002938 | -0.000002414 | 0.000001797  |
| 1  | -0.000002534 | -0.000000139 | 0.000002181  |
| 1  | -0.000002087 | -0.00000219  | 0.000001364  |
| 6  | -0.000004292 | -0.000001437 | 0.000001794  |
| 1  | -0.000003604 | -0.000002266 | 0.000001395  |
| 1  | -0.00000393  | -0.000001019 | 0.000001654  |

|    |              |              |              |
|----|--------------|--------------|--------------|
| 1  | -0.000004859 | -0.000001738 | 0.000002077  |
| 1  | -0.000004251 | -0.000000781 | 0.000002071  |
| 1  | -0.000004152 | -0.000001723 | 0.000001816  |
| 6  | -0.000002036 | -0.000000678 | -0.000000943 |
| 6  | -0.000000633 | 0.000000104  | 0.000000619  |
| 1  | 0.000001041  | 0.000001598  | -0.00000018  |
| 1  | 0.000000456  | 0.000003692  | 0.000000882  |
| 6  | -0.00000028  | 0.000001     | 0.000000015  |
| 1  | -0.000000192 | -0.000000704 | -0.000000664 |
| 1  | -0.000000628 | 0.000000406  | -0.000000027 |
| 6  | -0.000001498 | 0.000000489  | 0.000000905  |
| 1  | -0.000000658 | 0.000001611  | 0.000000855  |
| 1  | 0.000000264  | 0.000000792  | 0.000000043  |
| 1  | -0.000001424 | 0.000000327  | 0.000000746  |
| 1  | -0.000001012 | -0.000000656 | 0.000000317  |
| 1  | -0.000001939 | 0.000000079  | 0.00000112   |
| 16 | 0.000005803  | 0.000000054  | -0.000002471 |
| 8  | 0.000000083  | 0.000001933  | -0.000002454 |
| 8  | -0.000000794 | 0.000004259  | -0.000000045 |
| 6  | -0.00000011  | -0.000000061 | 0.000001927  |
| 6  | 0.000004101  | 0.000000507  | -0.000001136 |
| 6  | 0.000002649  | 0.000001548  | -0.000003404 |
| 6  | 0.000002011  | 0.000000231  | -0.000003032 |
| 1  | 0.00000231   | -0.000000345 | -0.000000732 |
| 6  | 0.000001773  | -0.000000401 | -0.000000072 |
| 1  | 0.000002531  | 0.000002243  | -0.000000042 |
| 6  | 0.000006132  | -0.000000772 | -0.000001053 |
| 1  | 0.00000347   | -0.000001693 | -0.000001669 |
| 1  | 0.000004399  | 0.000000952  | -0.000001977 |
| 6  | 0.000004054  | 0.000001346  | -0.000002166 |
| 1  | 0.000004826  | -0.000001112 | -0.000002216 |
| 1  | 0.000004521  | -0.000002156 | -0.000002722 |
| 1  | 0.000004169  | -0.000001047 | -0.00000261  |
| 1  | 0.000000231  | 0.000000672  | 0.000001     |
| 6  | 0.000000137  | 0.000002422  | 0.00000216   |
| 6  | 0.000000205  | 0.000006191  | 0.000001113  |
| 6  | 0.000000392  | 0.00000414   | 0.000000906  |
| 6  | -0.000000792 | 0.000003993  | 0.000001375  |
| 6  | -0.000002497 | 0.00000318   | 0.000001443  |
| 6  | -0.000000683 | 0.00000246   | 0.000001222  |
| 6  | -0.000005509 | 0.000004529  | -0.000004579 |
| 6  | 0.000003048  | 0.000006637  | 0.000000121  |
| 1  | 0.000000072  | 0.000005175  | 0.000000477  |
| 1  | -0.000001249 | 0.000005212  | 0.000001608  |

|                                              |              |              |                             |
|----------------------------------------------|--------------|--------------|-----------------------------|
| 1                                            | -0.000002032 | 0.000003538  | 0.0000015                   |
| 1                                            | -0.000001226 | 0.000001854  | 0.000001026                 |
| 1                                            | -0.000001747 | 0.000000275  | -0.00000048                 |
| 1                                            | 0.000000328  | 0.000001068  | 0.000000166                 |
| 7                                            | 0.000000312  | -0.000001039 | 0.000002418                 |
| 1                                            | 0.000001004  | 0.000004486  | -0.000001049                |
| Zero-point correction=                       |              |              | 0.673549 (Hartree/Particle) |
| Thermal correction to Energy=                |              |              | 0.715478                    |
| Thermal correction to Enthalpy=              |              |              | 0.716422                    |
| Thermal correction to Gibbs Free Energy=     |              |              | 0.591922                    |
| Sum of electronic and zero-point Energies=   |              |              | -2504.041948                |
| Sum of electronic and thermal Energies=      |              |              | -2504.000019                |
| Sum of electronic and thermal Enthalpies=    |              |              | -2503.999075                |
| Sum of electronic and thermal Free Energies= |              |              | -2504.123575                |

#### B-TSc11

|    |              |              |              |
|----|--------------|--------------|--------------|
| 6  | 0.000001013  | -0.000002058 | -0.000000789 |
| 6  | 0.000005946  | 0.000004202  | 0.000003522  |
| 7  | -0.000002269 | 0.000003133  | -0.000001915 |
| 7  | -0.000002105 | -0.000002084 | -0.000001328 |
| 16 | 0.000001479  | -0.000003516 | 0.000002171  |
| 8  | -0.000000625 | 0.000001018  | -0.000000974 |
| 8  | -0.000000417 | 0.000001201  | -0.000001189 |
| 6  | -0.000000295 | 0.000001412  | 0.000000282  |
| 6  | -0.000000152 | 0.000001984  | 0.000000812  |
| 6  | 0.000000129  | 0.000002723  | 0.00000112   |
| 6  | -0.000000108 | 0.000001692  | 0.000000369  |
| 6  | -0.000000258 | 0.000001633  | 0.000000305  |
| 6  | -0.000000285 | 0.00000114   | -0.000000091 |
| 1  | -0.000000142 | 0.000001691  | 0.000000364  |
| 1  | 0.000000067  | 0.000002426  | 0.000000933  |
| 1  | -0.000000206 | 0.000001665  | 0.000000323  |
| 1  | -0.000000392 | 0.000000907  | -0.000000191 |
| 6  | 0.000000201  | 0.000003055  | 0.000001067  |
| 1  | 0.000000378  | 0.000002912  | 0.000001388  |
| 1  | -0.000000362 | 0.000003027  | 0.00000131   |
| 1  | 0.000000544  | 0.000002718  | 0.000001491  |
| 6  | 0.000000787  | -0.000001221 | 0.000000949  |
| 6  | 0.000000282  | -0.000001177 | 0.000000586  |
| 1  | 0.000001123  | 0.000000273  | 0.000000466  |
| 1  | -0.000000301 | 0.000000441  | -0.000000004 |
| 6  | 0.000000829  | -0.00000155  | 0.000000866  |
| 1  | 0.000000391  | -0.000000651 | 0.000000406  |
| 1  | 0.000000686  | -0.000000959 | -0.000000274 |

|    |              |              |              |
|----|--------------|--------------|--------------|
| 6  | 0.000001087  | -0.000001983 | 0.000000695  |
| 1  | 0.000000662  | -0.000000976 | 0.000000377  |
| 1  | 0.000001255  | -0.000000806 | 0.000001123  |
| 1  | 0.000001381  | -0.000002004 | 0.000000889  |
| 1  | 0.000001309  | -0.000002054 | 0.000000779  |
| 1  | 0.000000812  | -0.00000217  | 0.00000032   |
| 6  | 0.000000237  | 0.000001017  | -0.000000247 |
| 6  | -0.000001012 | 0.000000217  | -0.000001378 |
| 1  | -0.000000376 | 0.000000442  | 0.00000017   |
| 1  | -0.000000401 | 0.000000841  | 0.000000064  |
| 6  | -0.000001126 | 0.000001213  | -0.000000754 |
| 1  | -0.000000938 | 0.000001004  | -0.000000375 |
| 1  | -0.000000679 | 0.000000994  | 0.000001378  |
| 6  | -0.000001526 | 0.000001586  | -0.000001344 |
| 1  | -0.000000946 | 0.000001438  | -0.000000599 |
| 1  | -0.000000964 | 0.000001742  | -0.000000443 |
| 1  | -0.000001633 | 0.000002026  | -0.000001312 |
| 1  | -0.000001725 | 0.000001592  | -0.000001487 |
| 1  | -0.000001645 | 0.000001168  | -0.000001502 |
| 16 | -0.000000743 | -0.000000649 | 0.000000019  |
| 8  | 0.00000072   | -0.000001644 | -0.000000069 |
| 8  | -0.000000571 | -0.000000066 | -0.000000953 |
| 6  | 0.000000622  | -0.000000304 | 0.000000638  |
| 6  | 0.000000581  | -0.000000601 | 0.000000721  |
| 6  | 0.000000683  | -0.000000071 | 0.000000058  |
| 6  | 0.000001112  | -0.000000276 | 0.000001285  |
| 1  | 0.000001037  | -0.000000069 | 0.000000936  |
| 6  | 0.000000775  | 0.000000029  | 0.000000815  |
| 1  | -0.000000091 | -0.000000134 | -0.000000134 |
| 6  | 0.000000827  | 0.000000007  | 0.000001332  |
| 1  | 0.000001455  | -0.000000359 | 0.000001652  |
| 1  | 0.000000494  | 0.000000255  | 0.000000679  |
| 6  | 0.000001489  | 0.000000089  | 0.000001543  |
| 1  | 0.000001664  | 0.000000381  | 0.000002215  |
| 1  | 0.00000121   | 0.000000057  | 0.00000175   |
| 1  | 0.000001574  | -0.000000022 | 0.000001813  |
| 1  | 0.000000751  | 0.000000288  | 0.00000102   |
| 6  | -0.000000207 | -0.00000189  | 0.000000213  |
| 6  | 0.00000005   | -0.000003439 | -0.000000172 |
| 6  | -0.000000791 | -0.000000918 | -0.000001444 |
| 6  | -0.000000022 | -0.000002477 | -0.000001233 |
| 6  | -0.000000052 | -0.000002922 | -0.000001012 |
| 6  | -0.000000341 | -0.000002681 | -0.000001705 |
| 6  | -0.000001818 | -0.000001583 | -0.000004759 |

|                                              |              |              |                             |
|----------------------------------------------|--------------|--------------|-----------------------------|
| 6                                            | -0.000003361 | 0.000000202  | -0.000000308                |
| 1                                            | -0.000000495 | -0.000001836 | -0.000001295                |
| 1                                            | -0.000000232 | -0.000002921 | -0.000001332                |
| 1                                            | -0.000000147 | -0.000003208 | -0.000001293                |
| 1                                            | -0.00000003  | -0.000002417 | -0.000001251                |
| 1                                            | -0.000001873 | 0.000000488  | -0.000002408                |
| 1                                            | -0.000000024 | -0.00000401  | -0.000001474                |
| 7                                            | -0.000004721 | 0.000006793  | -0.000002397                |
| 1                                            | 0.000001054  | -0.000004512 | -0.000002262                |
| Zero-point correction=                       |              |              | 0.669256 (Hartree/Particle) |
| Thermal correction to Energy=                |              |              | 0.712087                    |
| Thermal correction to Enthalpy=              |              |              | 0.713031                    |
| Thermal correction to Gibbs Free Energy=     |              |              | 0.585582                    |
| Sum of electronic and zero-point Energies=   |              |              | -2504.012172                |
| Sum of electronic and thermal Energies=      |              |              | -2503.969341                |
| Sum of electronic and thermal Enthalpies=    |              |              | -2503.968397                |
| Sum of electronic and thermal Free Energies= |              |              | -2504.095846                |

#### B-11c

|    |              |              |              |
|----|--------------|--------------|--------------|
| 6  | -0.000002752 | 0.000000222  | -0.000004088 |
| 6  | 0.000004748  | 0.000004548  | 0.000003601  |
| 7  | 0.000002443  | -0.000001625 | 0.00000327   |
| 7  | -0.00000025  | 0.000005068  | -0.000000162 |
| 16 | -0.000000859 | 0.00000057   | -0.000001718 |
| 8  | 0.000002358  | -0.000001274 | -0.000001394 |
| 8  | -0.000003992 | -0.000002875 | 0.000001217  |
| 6  | 0.000000298  | 0.000002053  | 0.000002823  |
| 6  | -0.000000304 | -0.000000315 | 0.000001     |
| 6  | 0.000002329  | -0.000001194 | 0.000000221  |
| 6  | -0.000002579 | -0.000001401 | 0.000001213  |
| 6  | 0.000000114  | 0.000003276  | -0.000001384 |
| 6  | -0.000000721 | -0.000002922 | -0.000000792 |
| 1  | -0.000000257 | 0.000001469  | -0.000000367 |
| 1  | -0.000000661 | -0.000000224 | 0.000000514  |
| 1  | -0.000000424 | -0.000000799 | 0.000000472  |
| 1  | 0.000001002  | -0.000000562 | 0.000000858  |
| 6  | 0.000001515  | -0.000000024 | -0.000000034 |
| 1  | -0.000000005 | -0.000000006 | 0.000001095  |
| 1  | -0.000001773 | -0.000001031 | 0.000000087  |
| 1  | -0.000000848 | -0.000000401 | -0.000000825 |
| 6  | 0.000000387  | -0.000000586 | 0.000000258  |
| 6  | 0.000000483  | 0.000001161  | 0.000001117  |
| 1  | -0.000000343 | 0.000000375  | 0.000000005  |
| 1  | -0.000000764 | -0.000000284 | -0.000001432 |

|    |              |              |              |
|----|--------------|--------------|--------------|
| 6  | 0.000000936  | -0.000000543 | 0.000000283  |
| 1  | 0.000000559  | -0.000000583 | 0.000000034  |
| 1  | 0.000000165  | -0.000000156 | 0.000000373  |
| 6  | 0.000000146  | 0.000000202  | -0.00000034  |
| 1  | 0.000000273  | 0.000000016  | 0.000000628  |
| 1  | 0.00000068   | 0.000000023  | 0.000000046  |
| 1  | 0.000000749  | -0.000000032 | 0.000000406  |
| 1  | 0.000000746  | 0.00000003   | -0.000000052 |
| 1  | 0.000000586  | -0.000000184 | 0.000000472  |
| 6  | -0.000001477 | -0.000002514 | -0.000000488 |
| 6  | 0.000000449  | 0.000000789  | 0.000001086  |
| 1  | -0.000000217 | 0.000000999  | -0.000000717 |
| 1  | 0.000000183  | -0.000000073 | 0.000000229  |
| 6  | -0.000000821 | -0.00000012  | -0.000000846 |
| 1  | -0.00000002  | -0.000000671 | -0.000000921 |
| 1  | -0.000000658 | -0.000000513 | -0.000000771 |
| 6  | -0.000000358 | -0.000000213 | 0.000000879  |
| 1  | -0.000000413 | 0.000000024  | -0.000000446 |
| 1  | -0.000000775 | 0.000000069  | -0.000000034 |
| 1  | -0.000000711 | 0.000000044  | -0.000000105 |
| 1  | -0.000000622 | -0.000000133 | -0.000000277 |
| 1  | -0.000000692 | -0.000000015 | -0.000000364 |
| 16 | -0.000000119 | -0.000011289 | 0.000002466  |
| 8  | 0.000001992  | 0.000006141  | -0.000002686 |
| 8  | -0.000000487 | 0.000001836  | 0.000000214  |
| 6  | -0.000000319 | 0.000001324  | -0.000000123 |
| 6  | 0.000000021  | -0.000000235 | -0.000000158 |
| 6  | 0.000000764  | 0.000000493  | 0.00000008   |
| 6  | -0.000000237 | 0.000001559  | -0.000000204 |
| 1  | 0.000000192  | 0.000000334  | -0.000000071 |
| 6  | 0.000000849  | -0.000000687 | -0.000000856 |
| 1  | -0.000000668 | 0.000000206  | -0.000000512 |
| 6  | -0.000000128 | -0.000000193 | 0.000000385  |
| 1  | 0.000000143  | 0.000000057  | -0.000000036 |
| 1  | -0.000000259 | 0.000000606  | -0.000000781 |
| 6  | -0.000000941 | 0.000000804  | -0.000000402 |
| 1  | 0.000000649  | -0.000000225 | -0.000000162 |
| 1  | -0.000000203 | 0.000001033  | -0.000000624 |
| 1  | 0.000001109  | 0.000000563  | -0.000000156 |
| 1  | -0.000000102 | 0.000000551  | -0.000000553 |
| 6  | 0.000004105  | 0.000001991  | -0.000001219 |
| 6  | -0.000003046 | 0.000000411  | -0.000000259 |
| 6  | 0.000000294  | -0.000000399 | 0.000000589  |
| 6  | -0.000000622 | 0.000000268  | 0.000000543  |

|                                                     |              |              |                                    |
|-----------------------------------------------------|--------------|--------------|------------------------------------|
| 6                                                   | 0.000000903  | 0.000000983  | -0.000000737                       |
| 6                                                   | 0.000000165  | -0.000001664 | 0.000000726                        |
| 6                                                   | -0.00000286  | 0.000000614  | -0.00000031                        |
| 6                                                   | -0.000001804 | -0.000005748 | -0.000004415                       |
| 1                                                   | 0.000000192  | -0.000000397 | 0.000000382                        |
| 1                                                   | 0.000000415  | -0.000000031 | 0.000000299                        |
| 1                                                   | 0.000000339  | 0.000000073  | -0.000000002                       |
| 1                                                   | -0.000000054 | -0.000000026 | -0.000000135                       |
| 1                                                   | 0.000001619  | -0.000000015 | 0.000001877                        |
| 1                                                   | -0.000003061 | 0.000000494  | 0.000000263                        |
| 7                                                   | 0.000006005  | -0.000001462 | 0.000004748                        |
| 1                                                   | -0.00000289  | 0.000001693  | -0.00000233                        |
| <b>Zero-point correction=</b>                       |              |              | <b>0.672044 (Hartree/Particle)</b> |
| <b>Thermal correction to Energy=</b>                |              |              | <b>0.714411</b>                    |
| <b>Thermal correction to Enthalpy=</b>              |              |              | <b>0.715356</b>                    |
| <b>Thermal correction to Gibbs Free Energy=</b>     |              |              | <b>0.588414</b>                    |
| <b>Sum of electronic and zero-point Energies=</b>   |              |              | <b>-2504.049831</b>                |
| <b>Sum of electronic and thermal Energies=</b>      |              |              | <b>-2504.007463</b>                |
| <b>Sum of electronic and thermal Enthalpies=</b>    |              |              | <b>-2504.006519</b>                |
| <b>Sum of electronic and thermal Free Energies=</b> |              |              | <b>-2504.133461</b>                |

#### B-TSc1

|    |              |              |              |
|----|--------------|--------------|--------------|
| 6  | -0.000000528 | 0.000000063  | -0.000000753 |
| 6  | -0.000000798 | -0.000000359 | -0.000000019 |
| 7  | 0.000000208  | -0.000000051 | -0.000000167 |
| 7  | -0.000000013 | 0.000000412  | 0.000000506  |
| 16 | 0.000000349  | -0.000000152 | -0.000000903 |
| 8  | 0.000000577  | -0.000000061 | 0.000000016  |
| 8  | 0.000001629  | -0.000000252 | -0.000001179 |
| 6  | -0.000000003 | -0.000000137 | -0.000001327 |
| 6  | -0.000001115 | -0.000000187 | -0.000001101 |
| 6  | -0.000001632 | 0.000000005  | -0.000001016 |
| 6  | -0.000000972 | -0.000000288 | -0.000002214 |
| 6  | -0.000000145 | -0.000000502 | -0.000002152 |
| 6  | 0.000000204  | -0.000000549 | -0.000001611 |
| 1  | -0.000001298 | -0.000000001 | -0.000000524 |
| 1  | -0.000002111 | -0.000000048 | -0.000001032 |
| 1  | 0.000000323  | -0.000000389 | -0.000002466 |
| 1  | 0.000001172  | -0.000000355 | -0.000001925 |
| 6  | -0.000000097 | -0.000000087 | -0.000001851 |
| 1  | -0.000001873 | -0.000000187 | -0.000001335 |
| 1  | -0.000002433 | -0.000000454 | -0.000002219 |
| 1  | -0.000001472 | -0.000000628 | -0.000002618 |
| 6  | 0.000000282  | -0.000000028 | -0.000002392 |

|    |              |              |              |
|----|--------------|--------------|--------------|
| 6  | 0.000000987  | -0.000000461 | -0.000002746 |
| 1  | -0.00000038  | -0.000000561 | -0.000002716 |
| 1  | 0.0000003    | -0.000000493 | -0.000002521 |
| 6  | 0.000001054  | -0.000000594 | -0.000003772 |
| 1  | 0.00000072   | -0.000000456 | -0.000002364 |
| 1  | 0.000001671  | -0.000000468 | -0.000002332 |
| 6  | 0.000001811  | -0.000000759 | -0.000003997 |
| 1  | 0.000001232  | -0.000000769 | -0.000004003 |
| 1  | 0.000000423  | -0.000000701 | -0.00000403  |
| 1  | 0.00000189   | -0.000000865 | -0.000004768 |
| 1  | 0.00000164   | -0.000000701 | -0.000003742 |
| 1  | 0.000002517  | -0.000000731 | -0.000003714 |
| 6  | 0.000000267  | 0.000000064  | 0.000001197  |
| 6  | 0.000000934  | 0.000000232  | 0.000000471  |
| 1  | 0.000000857  | 0.000000238  | 0.000001591  |
| 1  | 0.000000196  | 0.000000247  | 0.000001872  |
| 6  | 0.000001803  | 0.000000264  | 0.000001134  |
| 1  | 0.000001261  | 0.00000002   | 0.000000234  |
| 1  | 0.000001337  | -0.000000171 | 0.000000107  |
| 6  | 0.000002649  | 0.000000034  | 0.000000642  |
| 1  | 0.000001705  | 0.000000252  | 0.000001795  |
| 1  | 0.000002284  | 0.000000216  | 0.000001586  |
| 1  | 0.000003254  | 0.000000144  | 0.000001017  |
| 1  | 0.00000291   | -0.000000068 | 0.000000159  |
| 1  | 0.00000242   | -0.000000035 | 0.000000274  |
| 16 | -0.000001757 | 0.000000623  | 0.000001551  |
| 8  | -0.000001793 | 0.000000121  | 0.000000931  |
| 8  | -0.000001151 | 0.000000328  | 0.000002109  |
| 6  | -0.000000514 | 0.000000285  | 0.000001956  |
| 6  | -0.000000609 | 0.000000359  | 0.000001459  |
| 6  | -0.000000097 | 0.000000465  | 0.000002812  |
| 6  | 0.000000111  | 0.000000467  | 0.000001974  |
| 1  | -0.000000638 | 0.000000212  | 0.000001077  |
| 6  | -0.000000016 | 0.000000056  | 0.000000338  |
| 1  | -0.000000548 | 0.000000488  | 0.000003247  |
| 6  | 0.000000525  | 0.000000719  | 0.000003658  |
| 1  | 0.000000239  | 0.000000385  | 0.000002013  |
| 1  | 0.000000457  | 0.000000791  | 0.000004255  |
| 6  | 0.000001099  | 0.000000677  | 0.000003745  |
| 1  | 0.000000286  | 0.000000668  | 0.000003916  |
| 1  | 0.000001197  | 0.000000359  | 0.000003182  |
| 1  | 0.000001301  | 0.000000692  | 0.000003902  |
| 1  | -0.00000078  | -0.000000251 | -0.000001433 |
| 6  | -0.000001135 | 0.000000053  | 0.000000271  |



|                                                     |              |              |                                    |
|-----------------------------------------------------|--------------|--------------|------------------------------------|
| 6                                                   | -0.00000168  | 0.000000202  | 0.000001069                        |
| 6                                                   | -0.00000179  | 0.000000373  | 0.000001938                        |
| 6                                                   | -0.000001235 | 0.000000037  | 0.000002191                        |
| 6                                                   | -0.000000664 | 0.000000305  | 0.000001555                        |
| 6                                                   | -0.00000056  | 0.000000115  | 0.000000733                        |
| 6                                                   | -0.00000127  | 0.000000026  | -0.000000568                       |
| 6                                                   | -0.000002029 | -0.000000109 | 0.000000072                        |
| 1                                                   | -0.000002216 | 0.000000543  | 0.000002472                        |
| 1                                                   | -0.00000125  | 0.000000539  | 0.000002869                        |
| 1                                                   | -0.000000175 | 0.000000314  | 0.000001755                        |
| 1                                                   | -0.000000016 | 0.000000057  | 0.000000182                        |
| 1                                                   | -0.000001198 | -0.000000164 | -0.000000708                       |
| 1                                                   | -0.00000226  | 0.000000056  | -0.000000794                       |
| 7                                                   | -0.000002349 | 0.000000311  | 0.000000338                        |
| 1                                                   | -0.000002585 | 0.000000139  | 0.000001301                        |
| <b>Zero-point correction=</b>                       |              |              | <b>0.670881 (Hartree/Particle)</b> |
| <b>Thermal correction to Energy=</b>                |              |              | <b>0.713426</b>                    |
| <b>Thermal correction to Enthalpy=</b>              |              |              | <b>0.714370</b>                    |
| <b>Thermal correction to Gibbs Free Energy=</b>     |              |              | <b>0.588294</b>                    |
| <b>Sum of electronic and zero-point Energies=</b>   |              |              | <b>-2504.021641</b>                |
| <b>Sum of electronic and thermal Energies=</b>      |              |              | <b>-2503.979097</b>                |
| <b>Sum of electronic and thermal Enthalpies=</b>    |              |              | <b>-2503.978153</b>                |
| <b>Sum of electronic and thermal Free Energies=</b> |              |              | <b>-2504.104229</b>                |

#### B-1c

|    |              |              |              |
|----|--------------|--------------|--------------|
| 6  | 0.000002217  | 0.000003361  | -0.000000675 |
| 6  | -0.000001822 | -0.000003269 | -0.000002512 |
| 7  | -0.000002139 | -0.000002794 | -0.000002154 |
| 7  | 0.000002633  | 0.00000056   | 0.000004195  |
| 16 | 0.000000956  | 0.000001231  | 0.000001037  |
| 8  | -0.000000783 | 0.000000539  | 0.000002296  |
| 8  | 0.000001351  | 0.000001235  | 0.000000764  |
| 6  | 0.000000011  | 0.000000488  | 0.000001172  |
| 6  | -0.000002285 | 0.000003412  | -0.000000023 |
| 6  | 0.000000493  | 0.000003662  | 0.000001899  |
| 6  | -0.000001797 | 0.000001342  | 0.000001476  |
| 6  | -0.000000993 | 0.000002511  | -0.000000857 |
| 6  | 0.000000329  | 0.000003525  | 0.000001467  |
| 1  | -0.000000225 | 0.000001642  | 0.000000766  |
| 1  | -0.000001232 | 0.000002876  | 0.000000899  |
| 1  | -0.000000712 | 0.000002509  | 0.000001471  |
| 1  | -0.000000447 | 0.0000019    | 0.000000996  |
| 6  | -0.000001639 | 0.00000035   | 0.000000769  |
| 1  | -0.000001359 | 0.000004154  | 0.000001383  |

|    |              |              |              |
|----|--------------|--------------|--------------|
| 1  | -0.000001031 | 0.000004541  | 0.000000897  |
| 1  | -0.000001757 | 0.000004456  | 0.000001049  |
| 6  | 0.000000437  | 0.000003201  | 0.000001054  |
| 6  | -0.000001069 | -0.000001407 | -0.000000315 |
| 1  | -0.000001122 | 0.000001037  | -0.000000455 |
| 1  | -0.000000302 | 0.000000349  | 0.000000052  |
| 6  | -0.00000003  | 0.000001217  | -0.000001187 |
| 1  | -0.000001295 | 0.000000046  | -0.000000823 |
| 1  | 0.000000189  | -0.000000021 | -0.000000522 |
| 6  | -0.000001095 | -0.000000744 | -0.000001466 |
| 1  | -0.000000821 | 0.000000001  | -0.000000786 |
| 1  | -0.000001726 | 0.000000565  | -0.000001361 |
| 1  | -0.000001358 | -0.000000451 | -0.000001797 |
| 1  | -0.000001413 | -0.000000429 | -0.000001817 |
| 1  | -0.000000803 | -0.000001013 | -0.000001495 |
| 6  | 0.000000679  | 0.000001456  | -0.000000122 |
| 6  | 0.000000172  | -0.000001745 | -0.000000896 |
| 1  | 0.000000042  | -0.000001092 | -0.000000252 |
| 1  | -0.000000071 | -0.000001437 | 0.000000509  |
| 6  | 0.000000275  | -0.00000198  | -0.000000503 |
| 1  | -0.000000051 | -0.000000868 | -0.00000166  |
| 1  | 0.000000062  | -0.000001662 | -0.000000813 |
| 6  | -0.000000022 | -0.00000247  | -0.000001576 |
| 1  | 0.000000764  | -0.000002371 | -0.000000314 |
| 1  | 0.000000185  | -0.000001546 | -0.00000143  |
| 1  | 0.000000192  | -0.000002803 | -0.000001606 |
| 1  | -0.000000214 | -0.00000217  | -0.000001934 |
| 1  | 0.000000263  | -0.000002717 | -0.000001524 |
| 16 | 0.000000384  | -0.000001668 | -0.000004605 |
| 8  | 0.000002049  | 0.000000071  | 0.000004517  |
| 8  | -0.00000035  | -0.000001659 | 0.000000368  |
| 6  | 0.000001534  | 0.000000765  | 0.000000964  |
| 6  | 0.00000058   | 0.000000079  | 0.000000478  |
| 6  | 0.000001006  | -0.000001558 | 0.000001018  |
| 6  | 0.000002198  | -0.000000085 | 0.000001974  |
| 1  | 0.000001735  | -0.000000385 | 0.000001733  |
| 6  | 0.000002603  | -0.000001058 | 0.000000716  |
| 1  | 0.00000165   | -0.000001589 | 0.000000588  |
| 6  | 0.000002359  | -0.000002534 | 0.000002972  |
| 1  | 0.000001839  | -0.000000401 | 0.000002424  |
| 1  | 0.000002044  | -0.000002409 | 0.000001662  |
| 6  | 0.000002944  | -0.000001724 | 0.000002649  |
| 1  | 0.000002931  | -0.00000106  | 0.000002676  |
| 1  | 0.000002508  | -0.000000714 | 0.000002104  |

|   |              |              |              |
|---|--------------|--------------|--------------|
| 1 | 0.000003086  | -0.000001455 | 0.000001868  |
| 1 | -0.00000049  | 0.00000073   | -0.000000321 |
| 6 | -0.000003215 | -0.00000204  | -0.000000619 |
| 6 | -0.000002489 | 0.000001691  | -0.000002109 |
| 6 | -0.00000058  | -0.000000025 | 0.000000016  |
| 6 | -0.000000789 | -0.000000824 | -0.000001047 |
| 6 | -0.000000538 | -0.000000879 | -0.000002175 |
| 6 | -0.000000526 | -0.000001189 | -0.000001458 |
| 6 | 0.000002416  | -0.000001423 | -0.000002206 |
| 6 | -0.000003877 | 0.000003427  | -0.000000971 |
| 1 | 0.000000148  | -0.000000309 | -0.000000038 |
| 1 | -0.000000395 | -0.000000963 | -0.000001045 |
| 1 | -0.00000088  | -0.000001505 | -0.000001881 |
| 1 | -0.000001113 | -0.000001324 | -0.000002087 |
| 1 | -0.000001195 | -0.000000123 | -0.000000828 |
| 1 | 0.000000064  | 0.000000375  | -0.000001244 |
| 7 | 0.000000951  | 0.000000296  | 0.000002403  |
| 1 | 0.000000038  | -0.000000669 | -0.00000123  |

Zero-point correction=

0.672668 (Hartree/Particle)

Thermal correction to Energy=

0.714725

Thermal correction to Enthalpy=

0.715670

Thermal correction to Gibbs Free Energy=

0.591168

Sum of electronic and zero-point Energies=

-2504.039911

Sum of electronic and thermal Energies=

-2503.997853

Sum of electronic and thermal Enthalpies=

-2503.996909

Sum of electronic and thermal Free Energies=

-2504.121410

B-TSd1

|    |              |              |              |
|----|--------------|--------------|--------------|
| 6  | -0.000000017 | -0.000000745 | -0.000000654 |
| 6  | 0.000001775  | -0.000000634 | -0.000000934 |
| 7  | -0.000000365 | -0.000000642 | -0.000001727 |
| 7  | -0.000000249 | 0.000000524  | -0.000001528 |
| 16 | -0.000001169 | 0.000000241  | -0.00000124  |
| 8  | -0.000000242 | 0.000000358  | -0.00000217  |
| 8  | -0.000000821 | -0.000001938 | -0.000002679 |
| 6  | 0.000000013  | 0.00000037   | -0.000002227 |
| 6  | 0.000000483  | 0.000000937  | -0.00000173  |
| 6  | 0.000000972  | 0.000001174  | -0.000001962 |
| 6  | 0.000000409  | 0.000001013  | -0.000002036 |
| 6  | 0.000000001  | 0.000000533  | -0.000002307 |
| 6  | -0.000000077 | 0.000000066  | -0.000002252 |
| 1  | 0.000000567  | 0.000001168  | -0.000001628 |
| 1  | 0.000001192  | 0.000001923  | -0.000001873 |
| 1  | -0.000000135 | 0.000000314  | -0.000002649 |

|    |              |              |              |
|----|--------------|--------------|--------------|
| 1  | -0.00000077  | -0.000000475 | -0.00000249  |
| 6  | 0.000000745  | 0.000001777  | -0.000002728 |
| 1  | 0.000000708  | 0.000001378  | -0.000002226 |
| 1  | 0.000001122  | 0.000001809  | -0.000002997 |
| 1  | 0.000001088  | 0.000002298  | -0.000002009 |
| 6  | -0.00000074  | -0.000001011 | -0.00000016  |
| 6  | -0.000000978 | -0.000001425 | 0.000000047  |
| 1  | -0.000000462 | -0.000000708 | -0.000000447 |
| 1  | -0.000001117 | -0.000001174 | -0.000001212 |
| 6  | -0.000001395 | -0.000001953 | 0.000000415  |
| 1  | -0.000000968 | -0.000001356 | 0.000000721  |
| 1  | -0.000001392 | -0.000001879 | -0.000000115 |
| 6  | -0.000001669 | -0.000002382 | 0.000001111  |
| 1  | -0.000001638 | -0.000002068 | -0.000000084 |
| 1  | -0.000001128 | -0.000001521 | 0.000000601  |
| 1  | -0.000001872 | -0.000002689 | 0.000001304  |
| 1  | -0.000001471 | -0.000002295 | 0.000001619  |
| 1  | -0.000002001 | -0.000002833 | 0.000000868  |
| 6  | 0.000000471  | 0.000001081  | 0.000000561  |
| 6  | 0.000000841  | 0.000001254  | -0.000000647 |
| 1  | 0.000000836  | 0.000000709  | 0.000000065  |
| 1  | 0.000000267  | 0.000000427  | -0.000000108 |
| 6  | 0.000001127  | 0.000001638  | -0.000000864 |
| 1  | 0.000001036  | 0.000001326  | -0.000000307 |
| 1  | 0.000000488  | 0.000000909  | -0.000001107 |
| 6  | 0.000001411  | 0.000002149  | -0.000001632 |
| 1  | 0.000000876  | 0.00000138   | -0.000001123 |
| 1  | 0.000001379  | 0.000001907  | -0.000000034 |
| 1  | 0.000001645  | 0.000002511  | -0.000001781 |
| 1  | 0.000001665  | 0.000002429  | -0.000001352 |
| 1  | 0.000001112  | 0.000001935  | -0.000000214 |
| 16 | -0.000000071 | -0.000001034 | 0.000000678  |
| 8  | -0.000000221 | -0.000000646 | 0.000001958  |
| 8  | 0.000000069  | -0.000000201 | 0.000001432  |
| 6  | 0.000000944  | 0.000000437  | 0.000002115  |
| 6  | 0.000000717  | 0.000000355  | 0.000002554  |
| 6  | 0.000000964  | 0.000000898  | 0.000002301  |
| 6  | 0.000001193  | 0.000001039  | 0.000002699  |
| 1  | 0.00000038   | 0.000000318  | 0.000002206  |
| 6  | 0.000001497  | 0.000001343  | 0.000003349  |
| 1  | 0.000000633  | 0.000000692  | 0.000002237  |
| 6  | 0.00000201   | 0.000000954  | 0.000002829  |
| 1  | 0.000001206  | 0.000001248  | 0.000002956  |
| 1  | 0.000001518  | 0.00000151   | 0.000003174  |

|   |              |              |              |
|---|--------------|--------------|--------------|
| 6 | 0.000001816  | 0.000002367  | 0.000003812  |
| 1 | 0.000002123  | 0.000001526  | 0.000004314  |
| 1 | 0.000002249  | 0.000002445  | 0.000003438  |
| 1 | 0.000002215  | 0.000002247  | 0.000003586  |
| 1 | 0.000000502  | 0.000000437  | 0.000000471  |
| 6 | -0.000001198 | -0.000001267 | -0.000000249 |
| 6 | -0.00000111  | -0.000001887 | 0.000000357  |
| 6 | -0.000001721 | -0.000002347 | 0.000000432  |
| 6 | -0.000001479 | -0.000002299 | 0.000001002  |
| 6 | -0.000001532 | -0.000001987 | 0.000000942  |
| 6 | -0.00000133  | -0.000001844 | 0.000000031  |
| 6 | -0.0000011   | -0.000000554 | -0.000000889 |
| 6 | -0.00000046  | -0.000000057 | -0.00000132  |
| 1 | -0.000001479 | -0.000001934 | 0.000000668  |
| 1 | -0.000001783 | -0.000002648 | 0.000001466  |
| 1 | -0.000001637 | -0.000002463 | 0.000001271  |
| 1 | -0.000001182 | -0.000001635 | 0.000000161  |
| 1 | -0.000000699 | -0.000000705 | -0.00000128  |
| 1 | -0.00000035  | -0.000000326 | -0.000001679 |
| 7 | -0.000002751 | 0.000001533  | -0.000002501 |
| 1 | -0.000001484 | -0.000003327 | 0.000003046  |

Zero-point correction=

0.669069 (Hartree/Particle)

Thermal correction to Energy=

0.712048

Thermal correction to Enthalpy=

0.712992

Thermal correction to Gibbs Free Energy=

0.585671

Sum of electronic and zero-point Energies=

-2504.013312

Sum of electronic and thermal Energies=

-2503.970333

Sum of electronic and thermal Enthalpies=

-2503.969389

Sum of electronic and thermal Free Energies=

-2504.096710

B-1d

|    |              |              |              |
|----|--------------|--------------|--------------|
| 6  | 0.000003169  | -0.000003992 | -0.000000669 |
| 6  | -0.000005174 | 0.000001748  | -0.00000288  |
| 7  | 0.000004877  | -0.000002545 | -0.000003411 |
| 7  | -0.000000955 | 0.000012438  | 0.000001392  |
| 16 | -0.000001198 | 0.00000051   | 0.000005109  |
| 8  | -0.000003126 | -0.000003421 | -0.000005297 |
| 8  | -0.000000359 | -0.00000213  | -0.000001749 |
| 6  | -0.000001463 | -0.000002968 | -0.00000086  |
| 6  | -0.000000347 | -0.000001188 | 0.000000978  |
| 6  | -0.000000802 | -0.000001999 | 0.000001298  |
| 6  | -0.000000131 | -0.000001803 | 0.000001132  |
| 6  | -0.00000051  | -0.000001247 | 0.000000459  |
| 6  | 0.000000368  | -0.000003155 | 0.000000066  |

|    |              |              |              |
|----|--------------|--------------|--------------|
| 1  | -0.00000799  | -0.000001977 | 0.000001063  |
| 1  | -0.000001479 | -0.000002239 | 0.00000174   |
| 1  | -0.000000299 | -0.000001919 | 0.000000103  |
| 1  | 0.000000615  | -0.000001892 | -0.000000986 |
| 6  | -0.000000845 | -0.000001796 | 0.000001665  |
| 1  | -0.000001243 | -0.000001599 | 0.000001842  |
| 1  | -0.000001903 | -0.000003239 | 0.000002034  |
| 1  | -0.00000226  | -0.000001929 | 0.00000285   |
| 6  | 0.000002442  | 0.000000312  | -0.000000698 |
| 6  | 0.000001736  | -0.000000007 | -0.000001121 |
| 1  | 0.00000058   | 0.000000279  | -0.000001386 |
| 1  | 0.000000129  | -0.000000246 | -0.000001617 |
| 6  | 0.000000916  | 0.000002149  | -0.000001824 |
| 1  | 0.000000794  | 0.000002551  | -0.000001185 |
| 1  | 0.000001068  | 0.00000113   | -0.000002893 |
| 6  | 0.000001862  | 0.000002956  | -0.000002008 |
| 1  | 0.000001853  | 0.00000157   | -0.000002339 |
| 1  | 0.000001128  | 0.000002153  | -0.000001509 |
| 1  | 0.000001754  | 0.000003462  | -0.000002314 |
| 1  | 0.000001503  | 0.000003562  | -0.000001997 |
| 1  | 0.000002261  | 0.00000261   | -0.000003092 |
| 6  | -0.000000002 | -0.000003092 | -0.000001133 |
| 6  | -0.000000385 | -0.00000146  | 0.00000138   |
| 1  | -0.000000727 | -0.000000672 | -0.000000716 |
| 1  | 0.000000371  | -0.000000268 | 0.000001124  |
| 6  | -0.000001498 | -0.000002233 | 0.00000078   |
| 1  | -0.000000871 | -0.00000043  | 0.000000931  |
| 1  | -0.000001765 | -0.000003054 | 0.000000282  |
| 6  | -0.000000704 | -0.000003347 | 0.000001656  |
| 1  | -0.000000646 | -0.000002169 | 0.000000818  |
| 1  | -0.000001143 | -0.000001407 | 0.000001726  |
| 1  | -0.000001873 | -0.000003353 | 0.000002     |
| 1  | -0.000002047 | -0.000002124 | 0.000002453  |
| 1  | -0.000001265 | -0.000003549 | 0.000001525  |
| 16 | 0.000002333  | 0.000002768  | 0.000003182  |
| 8  | -0.000001421 | -0.000000471 | -0.000002845 |
| 8  | 0.000004134  | -0.000000711 | 0.000000216  |
| 6  | -0.000001641 | 0.000002739  | 0.00000281   |
| 6  | -0.000001    | 0.000002257  | 0.000001786  |
| 6  | 0.000000403  | 0.000000852  | -0.000000698 |
| 6  | -0.000001609 | 0.000000908  | 0.000001803  |
| 1  | -0.000001469 | 0.000002394  | 0.000002339  |
| 6  | -0.000001731 | 0.000002833  | 0.000002423  |
| 1  | -0.000001334 | 0.000001992  | 0.000002666  |

|   |              |              |              |
|---|--------------|--------------|--------------|
| 6 | -0.000001593 | 0.000002911  | 0.000004388  |
| 1 | -0.000001927 | 0.000002243  | 0.000003328  |
| 1 | -0.000001868 | 0.000002387  | 0.000003348  |
| 6 | -0.000002681 | 0.000002603  | 0.000005513  |
| 1 | -0.00000241  | 0.000003577  | 0.000003458  |
| 1 | -0.00000231  | 0.000002222  | 0.000004043  |
| 1 | -0.000002543 | 0.000002175  | 0.000003873  |
| 1 | 0.000000281  | 0.00000182   | 0.000002512  |
| 6 | -0.000000873 | -0.000000132 | -0.000002021 |
| 6 | 0.000000562  | -0.000004203 | -0.000002815 |
| 6 | 0.000002551  | 0.000001379  | -0.000002103 |
| 6 | 0.000000458  | 0.000002278  | -0.000002535 |
| 6 | 0.000002235  | 0.000000764  | -0.000002468 |
| 6 | 0.00000224   | -0.000000225 | -0.000003521 |
| 6 | 0.000003649  | -0.000002566 | 0.000000025  |
| 6 | 0.000001261  | -0.000000437 | -0.000011653 |
| 1 | 0.00000148   | 0.000001088  | -0.000001264 |
| 1 | 0.000002182  | 0.000002352  | -0.000002748 |
| 1 | 0.000002391  | 0.000001379  | -0.000003465 |
| 1 | 0.000002164  | -0.000000529 | -0.000003009 |
| 1 | 0.000001078  | -0.000001824 | -0.000002192 |
| 1 | 0.000001815  | -0.00000252  | 0.000000331  |
| 7 | 0.00000078   | -0.000000865 | 0.000002281  |
| 1 | 0.000002809  | -0.000000421 | -0.00000171  |

Zero-point correction=

0.672927 (Hartree/Particle)

Thermal correction to Energy=

0.715087

Thermal correction to Enthalpy=

0.716031

Thermal correction to Gibbs Free Energy=

0.590548

Sum of electronic and zero-point Energies=

-2504.035441

Sum of electronic and thermal Energies=

-2503.993281

Sum of electronic and thermal Enthalpies=

-2503.992337

Sum of electronic and thermal Free Energies=

-2504.117820

B-TSd11

|    |              |              |              |
|----|--------------|--------------|--------------|
| 6  | -0.000000422 | -0.000000707 | -0.00000018  |
| 6  | -0.000000743 | 0.000000511  | -0.000001686 |
| 7  | -0.000000188 | 0.000000352  | -0.000000194 |
| 7  | 0.00000047   | 0.000000166  | 0.000000418  |
| 16 | 0.000000822  | 0.000000286  | 0.000000246  |
| 8  | 0.000000552  | 0.000000814  | 0.000001273  |
| 8  | -0.000000114 | 0.000000051  | -0.000000083 |
| 6  | -0.000000496 | 0.000000051  | 0.000001072  |
| 6  | 0.000000001  | -0.00000003  | 0.000000851  |
| 6  | -0.000000893 | -0.000001047 | 0.000001429  |

|    |              |              |              |
|----|--------------|--------------|--------------|
| 6  | -0.000001433 | -0.000000753 | 0.00000059   |
| 6  | -0.00000028  | -0.000000377 | 0.00000122   |
| 6  | -0.000000358 | -0.000000181 | 0.000000922  |
| 1  | -0.000000279 | -0.000000492 | 0.000000712  |
| 1  | -0.000000733 | -0.000001064 | 0.000001517  |
| 1  | -0.000000439 | -0.000000189 | 0.000001812  |
| 1  | -0.000000242 | 0.000000363  | 0.000001008  |
| 6  | -0.000001867 | -0.00000057  | 0.000003822  |
| 1  | -0.000000267 | -0.000000935 | 0.000002382  |
| 1  | -0.000000748 | 0.000000246  | 0.000002678  |
| 1  | -0.000000285 | -0.000000702 | 0.000001695  |
| 6  | -0.000000107 | -0.00000048  | 0.000000179  |
| 6  | 0.000000126  | 0.000000103  | -0.000000655 |
| 1  | -0.000000142 | -0.000000679 | -0.000000377 |
| 1  | -0.000000105 | -0.000000347 | 0.000000022  |
| 6  | 0.000000015  | -0.00000044  | -0.000000885 |
| 1  | 0.000000212  | -0.000000272 | -0.000000991 |
| 1  | 0.000000375  | 0.000000244  | -0.000000577 |
| 6  | 0.000000412  | 0.00000007   | -0.000001321 |
| 1  | 0.000000097  | -0.000000236 | -0.000000594 |
| 1  | 0.000000057  | -0.000000641 | -0.000000908 |
| 1  | 0.000000433  | -0.000000202 | -0.000001338 |
| 1  | 0.000000433  | -0.000000081 | -0.000001652 |
| 1  | 0.000000485  | 0.000000353  | -0.00000123  |
| 6  | 0.000000632  | 0.000000357  | -0.000000668 |
| 6  | 0.000000581  | 0.000001699  | -0.000000575 |
| 1  | 0.000000408  | 0.000000574  | -0.000000146 |
| 1  | 0.00000021   | 0.000000609  | -0.000000977 |
| 6  | 0.000000826  | 0.000000948  | -0.00000093  |
| 1  | 0.000000196  | 0.000000147  | -0.000000718 |
| 1  | 0.000000695  | 0.000000743  | -0.000000642 |
| 6  | 0.000000778  | 0.00000173   | -0.000001364 |
| 1  | 0.000000596  | 0.000001346  | -0.000001173 |
| 1  | 0.000000579  | 0.000001617  | -0.000000643 |
| 1  | 0.00000091   | 0.000001953  | -0.00000135  |
| 1  | 0.000000749  | 0.000001738  | -0.000000824 |
| 1  | 0.000000856  | 0.000001369  | -0.000001479 |
| 16 | -0.000000387 | 0.000000261  | 0.000000234  |
| 8  | -0.000000034 | -0.000000563 | -0.000000193 |
| 8  | -0.000000049 | -0.000000804 | 0.000000236  |
| 6  | -0.000000463 | -0.00000005  | 0.000000068  |
| 6  | -0.000000203 | -0.00000011  | 0.000000419  |
| 6  | -0.000000424 | 0.00000019   | 0.000000074  |
| 6  | -0.000000421 | 0.000000769  | 0.000000087  |



|   |              |              |              |
|---|--------------|--------------|--------------|
| 1 | -0.000000394 | 0.000000658  | 0.000000805  |
| 6 | -0.000000038 | 0.000000948  | 0.000000822  |
| 1 | 0.000000275  | 0.000000346  | 0.000000314  |
| 6 | 0.000000374  | 0.000002672  | 0.000002294  |
| 1 | -0.000000227 | 0.000000982  | 0.00000205   |
| 1 | 0.000000177  | 0.000001078  | 0.000001254  |
| 6 | 0.000000217  | 0.000001162  | 0.000002644  |
| 1 | -0.000000651 | 0.00000078   | 0.000001644  |
| 1 | -0.000000522 | 0.000001509  | 0.000001381  |
| 1 | 0.00000014   | 0.000001672  | 0.000000957  |
| 1 | 0.000000008  | -0.000000713 | -0.00000074  |
| 6 | -0.000000013 | -0.000001284 | -0.000000949 |
| 6 | 0.000000068  | -0.00000116  | -0.000000482 |
| 6 | -0.000000088 | -0.00000137  | -0.000000586 |
| 6 | -0.000000453 | -0.000001929 | -0.00000073  |
| 6 | -0.000000357 | -0.000001746 | -0.00000055  |
| 6 | 0.000000013  | -0.000001292 | -0.000000937 |
| 6 | 0.000000273  | -0.000000382 | -0.000001488 |
| 6 | 0.000000496  | -0.000000301 | -0.000001489 |
| 1 | -0.000000151 | -0.000001511 | -0.000000432 |
| 1 | -0.000000425 | -0.000002147 | -0.000000351 |
| 1 | -0.000000371 | -0.000002183 | -0.000000603 |
| 1 | 0.000000002  | -0.000001559 | -0.000001109 |
| 1 | 0.000000434  | -0.000000542 | -0.000001564 |
| 1 | 0.000000084  | 0.000000377  | -0.000001902 |
| 7 | 0.000000863  | -0.000001591 | -0.000000871 |
| 1 | -0.000000252 | -0.000000372 | -0.000001388 |

Zero-point correction=

0.671058 (Hartree/Particle)

Thermal correction to Energy=

0.713386

Thermal correction to Enthalpy=

0.714330

Thermal correction to Gibbs Free Energy=

0.589369

Sum of electronic and zero-point Energies=

-2504.008083

Sum of electronic and thermal Energies=

-2503.965755

Sum of electronic and thermal Enthalpies=

-2503.964811

Sum of electronic and thermal Free Energies=

-2504.089772

B-11d

|    |              |              |              |
|----|--------------|--------------|--------------|
| 6  | -0.000007896 | 0.00000729   | 0.000002745  |
| 6  | -0.000000043 | -0.00000486  | 0.000001999  |
| 7  | 0.000009215  | -0.000015362 | -0.000009281 |
| 7  | 0.000001971  | 0.00000084   | 0.000006262  |
| 16 | -0.000004366 | 0.00000784   | 0.000006545  |
| 8  | -0.000002457 | -0.000001085 | -0.000001885 |
| 8  | 0.000003238  | 0.000001733  | -0.000002487 |

|    |              |              |              |
|----|--------------|--------------|--------------|
| 6  | -0.000002969 | -0.000002293 | 0.000003705  |
| 6  | 0.00000189   | 0.000000179  | -0.000001612 |
| 6  | -0.000000407 | -0.000003322 | -0.000000242 |
| 6  | -0.00000194  | -0.000003051 | -0.000000085 |
| 6  | -0.000001549 | -0.000003193 | -0.000000831 |
| 6  | -0.000000787 | -0.000004082 | -0.000002988 |
| 1  | -0.000000854 | -0.000002512 | 0.00000002   |
| 1  | -0.000001232 | -0.000002057 | -0.000001296 |
| 1  | -0.000001038 | -0.000003762 | -0.0000013   |
| 1  | -0.000000404 | -0.00000118  | -0.000000094 |
| 6  | -0.00000156  | -0.000003488 | -0.000001748 |
| 1  | -0.000001826 | -0.000004127 | -0.000001503 |
| 1  | -0.000001834 | -0.000004376 | -0.000001846 |
| 1  | -0.000001879 | -0.000004661 | -0.000000912 |
| 6  | 0.000003143  | 0.000001725  | 0.000004406  |
| 6  | -0.000000138 | -0.000002792 | 0.000001002  |
| 1  | 0.00000156   | -0.000001591 | 0.000000821  |
| 1  | 0.000000156  | -0.000001984 | -0.000000664 |
| 6  | 0.000002946  | -0.000001181 | 0.000001794  |
| 1  | 0.000002147  | -0.000000694 | 0.000001346  |
| 1  | 0.000001378  | -0.000001064 | 0.000000772  |
| 6  | 0.000002312  | -0.000001571 | 0.000002231  |
| 1  | 0.000001483  | -0.000002333 | 0.000001246  |
| 1  | 0.000001999  | -0.000002165 | 0.000001754  |
| 1  | 0.000002734  | -0.000001851 | 0.000002314  |
| 1  | 0.000002788  | -0.000000788 | 0.000002246  |
| 1  | 0.000002221  | -0.000000967 | 0.000001721  |
| 6  | -0.000000011 | 0.000003333  | -0.000003823 |
| 6  | 0.000000014  | 0.000001806  | -0.000000521 |
| 1  | -0.0000004   | 0.000001479  | -0.000000628 |
| 1  | 0.000000905  | 0.000002287  | 0.000001134  |
| 6  | 0.000000143  | 0.000002605  | 0.000000022  |
| 1  | -0.000000589 | 0.000001185  | 0.000000698  |
| 1  | 0.000000582  | 0.000001566  | 0.000000321  |
| 6  | 0.000000351  | 0.000002974  | 0.000000493  |
| 1  | 0.000000639  | 0.000003229  | 0.00000042   |
| 1  | 0.000000173  | 0.000003261  | -0.000000029 |
| 1  | 0.000000709  | 0.000003461  | 0.000000404  |
| 1  | 0.000000511  | 0.000002269  | 0.000000247  |
| 1  | 0.000000989  | 0.000002542  | 0.000001038  |
| 16 | 0.000004862  | 0.000006042  | 0.000003199  |
| 8  | -0.000002321 | -0.000001232 | -0.000002325 |
| 8  | -0.000000237 | 0.000000096  | -0.000001194 |
| 6  | -0.000006603 | -0.000004448 | -0.000004995 |

|   |              |              |              |
|---|--------------|--------------|--------------|
| 6 | 0.00000695   | 0.00005636   | 0.000001502  |
| 6 | 0.000001509  | 0.000003842  | -0.000000208 |
| 6 | -0.000003568 | -0.000000552 | -0.000004074 |
| 1 | -0.000002134 | -0.000000651 | -0.000001561 |
| 6 | -0.000004072 | 0.000002428  | -0.000001053 |
| 1 | -0.000001884 | 0.00000202   | -0.000000858 |
| 6 | -0.000000185 | 0.00000224   | -0.00000093  |
| 1 | -0.000002626 | 0.000000439  | -0.000002047 |
| 1 | -0.000002087 | 0.00000274   | -0.000002091 |
| 6 | -0.000002837 | 0.000001628  | -0.000002585 |
| 1 | -0.000004396 | 0.000001884  | -0.00000302  |
| 1 | -0.000003343 | 0.000001572  | -0.000002409 |
| 1 | -0.00000317  | 0.000002475  | -0.000003224 |
| 1 | 0.000002473  | -0.000001905 | -0.000000586 |
| 6 | 0.000001606  | -0.000002962 | -0.000001226 |
| 6 | 0.000001587  | -0.00000197  | 0.000004613  |
| 6 | 0.000000619  | 0.000000734  | -0.000001197 |
| 6 | 0.000000497  | -0.000000169 | 0.00000137   |
| 6 | 0.000002305  | -0.000000355 | 0.000001846  |
| 6 | 0.000000133  | 0.000001486  | 0.000000979  |
| 6 | 0.000003316  | 0.000008287  | 0.000001642  |
| 6 | 0.000001633  | -0.000005709 | 0.000001939  |
| 1 | 0.000000305  | -0.000001632 | 0.0000012    |
| 1 | 0.000000832  | -0.000001116 | 0.000000353  |
| 1 | 0.000001027  | 0.000000353  | 0.000001139  |
| 1 | 0.000001097  | 0.000001343  | 0.000001013  |
| 1 | 0.000001003  | 0.000000353  | 0.000001788  |
| 1 | 0.000002374  | 0.000004196  | 0.0000017    |
| 7 | -0.000003147 | 0.000005673  | -0.000004646 |
| 1 | 0.000002719  | -0.000001972 | 0.000002012  |

Zero-point correction=

0.673026 (Hartree/Particle)

Thermal correction to Energy=

0.715224

Thermal correction to Enthalpy=

0.716168

Thermal correction to Gibbs Free Energy=

0.592052

Sum of electronic and zero-point Energies=

-2504.010773

Sum of electronic and thermal Energies=

-2503.968575

Sum of electronic and thermal Enthalpies=

-2503.967631

Sum of electronic and thermal Free Energies=

-2504.091747

B-Tsg1

|   |              |              |              |
|---|--------------|--------------|--------------|
| 6 | -0.000002539 | 0.000001157  | 0.000001276  |
| 6 | -0.000000392 | -0.000000679 | -0.000000875 |
| 7 | 0.000001727  | -0.000001422 | -0.000000897 |
| 7 | -0.000000143 | 0.000000146  | 0.000000209  |

|    |              |              |              |
|----|--------------|--------------|--------------|
| 16 | 0.000000545  | 0.000000209  | -0.000000582 |
| 8  | 0.000000352  | -0.000000114 | 0.000000374  |
| 8  | 0.000000361  | 0.000000158  | 0.000000373  |
| 6  | 0.000000485  | -0.000000208 | 0.000000342  |
| 6  | -0.000000003 | 0.000000235  | 0.000000233  |
| 6  | -0.000000009 | 0.000000506  | 0.000000764  |
| 6  | 0.000000251  | 0.000000231  | 0.000000644  |
| 6  | 0.000000442  | 0.000000433  | 0.000000628  |
| 6  | 0.000000392  | 0.000000246  | 0.000000689  |
| 1  | 0.000000037  | 0.000000245  | 0.000000522  |
| 1  | 0.000000056  | 0.000000519  | 0.000000737  |
| 1  | 0.000000604  | 0.000000405  | 0.000000818  |
| 1  | 0.000000622  | 0.000000238  | 0.000000506  |
| 6  | 0.000000355  | 0.000000486  | 0.000000092  |
| 1  | 0.000000278  | 0.000000559  | 0.000001122  |
| 1  | 0.000000032  | 0.000000535  | 0.000000985  |
| 1  | 0.000000099  | 0.000000733  | 0.000001053  |
| 6  | 0.000001013  | -0.000000187 | 0.000000706  |
| 6  | -0.000000307 | 0.000000002  | 0.000000137  |
| 1  | 0.000000356  | 0.000000231  | 0.000000014  |
| 1  | -0.000000069 | 0.000000347  | 0.000000008  |
| 6  | -0.000000079 | 0.000000078  | 0.000000432  |
| 1  | 0.000000129  | 0.000000212  | 0.000000181  |
| 1  | -0.000000263 | 0.000000243  | 0.000000011  |
| 6  | -0.000000425 | 0.000000217  | 0.000000292  |
| 1  | -0.000000125 | 0.000000158  | 0.000000185  |
| 1  | 0.000000012  | 0.000000227  | 0.000000348  |
| 1  | -0.000000347 | 0.000000281  | 0.000000443  |
| 1  | -0.000000342 | 0.000000413  | 0.000000431  |
| 1  | -0.000000496 | 0.000000245  | 0.000000027  |
| 6  | -0.000000109 | -0.000000248 | -0.000000508 |
| 6  | -0.000000187 | -0.000000335 | -0.000000544 |
| 1  | 0.000000019  | -0.000000236 | -0.000000349 |
| 1  | -0.000000158 | -0.000000124 | -0.000000275 |
| 6  | -0.000000019 | -0.000000296 | -0.000000722 |
| 1  | -0.000000154 | -0.000000337 | -0.000000682 |
| 1  | -0.000000347 | -0.000000326 | -0.000000508 |
| 6  | -0.000000391 | -0.000000493 | -0.000000854 |
| 1  | -0.000000344 | -0.000000387 | -0.000000624 |
| 1  | -0.000000041 | -0.000000424 | -0.000000701 |
| 1  | -0.000000031 | -0.000000557 | -0.000000976 |
| 1  | -0.000000241 | -0.000000517 | -0.000000981 |
| 1  | -0.000000489 | -0.000000473 | -0.000000881 |
| 16 | -0.000000312 | 0.000000004  | 0.000000005  |

|    |              |              |              |
|----|--------------|--------------|--------------|
| 8  | -0.000000242 | 0.000000079  | -0.000000031 |
| 8  | -0.000000046 | -0.000000057 | -0.000000193 |
| 6  | -0.000000444 | -0.000000039 | 0.000000139  |
| 6  | -0.000000042 | -0.000000059 | 0.000000071  |
| 6  | -0.000000441 | 0.000000437  | -0.000000067 |
| 6  | 0.000000021  | 0.000000363  | 0.000000174  |
| 1  | 0.000000134  | -0.000000009 | 0.000000116  |
| 6  | -0.000000043 | 0.000000033  | -0.000000012 |
| 1  | -0.000000643 | 0.000000049  | -0.000000016 |
| 6  | -0.000000039 | 0.000000342  | 0.000000392  |
| 1  | 0.000000029  | 0.000000108  | 0.000000026  |
| 1  | -0.000000655 | 0.000000084  | 0.000000093  |
| 6  | -0.000000359 | 0.000000014  | 0.000000339  |
| 1  | -0.000000419 | 0.000000255  | 0.000000314  |
| 1  | -0.000000014 | 0.000000322  | 0.000000047  |
| 1  | -0.000000207 | 0.000000135  | 0.000000207  |
| 1  | -0.000000276 | -0.000000335 | -0.000000166 |
| 8  | 0.000000427  | 0.000000215  | -0.000000382 |
| 6  | 0.000000345  | -0.000000247 | -0.000000381 |
| 6  | 0.000000065  | -0.000000036 | -0.000000402 |
| 6  | 0.000000324  | -0.000000331 | -0.000000055 |
| 6  | 0.000000566  | -0.000000444 | -0.000000637 |
| 6  | 0.000000367  | -0.000000736 | -0.000000911 |
| 1  | 0.000000795  | -0.000000532 | -0.000000674 |
| 1  | 0.000000718  | -0.000000095 | -0.000000306 |
| 7  | -0.000000699 | -0.000000314 | -0.000000082 |
| 8  | 0.000000633  | -0.000000079 | -0.000000068 |
| 1  | 0.000000047  | -0.000000612 | -0.000000889 |
| 1  | 0.000000008  | -0.000000359 | -0.000000396 |
| 17 | -0.000000045 | -0.000000311 | -0.000000721 |

Zero-point correction=

0.630190 (Hartree/Particle)

Thermal correction to Energy=

0.673048

Thermal correction to Enthalpy=

0.673992

Thermal correction to Gibbs Free Energy=

0.548567

Sum of electronic and zero-point Energies=

-2998.560912

Sum of electronic and thermal Energies=

-2998.518055

Sum of electronic and thermal Enthalpies=

-2998.517110

Sum of electronic and thermal Free Energies=

-2998.642536

B-1g

|    |              |              |              |
|----|--------------|--------------|--------------|
| 6  | 0.000001553  | -0.000002634 | -0.000001288 |
| 6  | -0.000000013 | -0.000000874 | 0.000001187  |
| 7  | 0.000001796  | 0.000002443  | 0.000000052  |
| 7  | 0.000001575  | 0.000000644  | -0.000001861 |
| 16 | 0.000001633  | 0.000000095  | 0.000002456  |

|    |              |              |              |
|----|--------------|--------------|--------------|
| 8  | -0.000001844 | -0.000003194 | 0.000001333  |
| 8  | -0.000000592 | -0.00000135  | 0.000001838  |
| 6  | -0.000000248 | -0.00000136  | 0.000000717  |
| 6  | 0.000000131  | 0.000000716  | 0.000001967  |
| 6  | -0.000000271 | 0.000000495  | 0.000003237  |
| 6  | -0.000000139 | 0.000000382  | 0.000004768  |
| 6  | -0.000000491 | -0.00000109  | 0.000004216  |
| 6  | -0.000000371 | -0.000001658 | 0.000004725  |
| 1  | -0.000000307 | -0.000000077 | 0.000001414  |
| 1  | 0.000000024  | 0.000000944  | 0.000002916  |
| 1  | -0.000000436 | -0.000001342 | 0.000005215  |
| 1  | -0.000000419 | -0.000001514 | 0.000003538  |
| 6  | -0.000000149 | 0.000000163  | 0.000004992  |
| 1  | -0.000000389 | -0.000000051 | 0.000005933  |
| 1  | -0.000000324 | -0.000000147 | 0.000005024  |
| 1  | -0.000000146 | 0.000001153  | 0.000005188  |
| 6  | -0.000002641 | -0.000000424 | 0.000001379  |
| 6  | 0.000000597  | 0.000001005  | 0.000003078  |
| 1  | 0.000000312  | 0.000000615  | 0.000002986  |
| 1  | 0.000000513  | 0.000000644  | 0.000001711  |
| 6  | 0.000000455  | 0.000002858  | 0.000002313  |
| 1  | 0.000000196  | 0.000002119  | 0.000001514  |
| 1  | -0.000000172 | 0.000002239  | 0.000000975  |
| 6  | 0.000000373  | 0.000003725  | 0.000002959  |
| 1  | 0.000000125  | 0.000002398  | 0.000002688  |
| 1  | 0.000000053  | 0.000002156  | 0.000003644  |
| 1  | 0.000000302  | 0.00000415   | 0.000003494  |
| 1  | 0.000000259  | 0.000003753  | 0.000003051  |
| 1  | 0.000000409  | 0.000004109  | 0.000002123  |
| 6  | -0.000000661 | -0.000001623 | -0.000002657 |
| 6  | 0.000000467  | 0.000000232  | -0.00000359  |
| 1  | -0.000000038 | -0.000001271 | -0.000002569 |
| 1  | 0.000000098  | -0.000000227 | -0.000003033 |
| 6  | 0.000000238  | -0.000000872 | -0.000004639 |
| 1  | 0.000000035  | -0.000000552 | -0.000003404 |
| 1  | 0.000000218  | 0.000000704  | -0.000003794 |
| 6  | 0.000000126  | -0.000000339 | -0.000005821 |
| 1  | 0.000000219  | -0.000000537 | -0.000004897 |
| 1  | 0.00000007   | -0.000001621 | -0.000004681 |
| 1  | 0.000000339  | -0.000000775 | -0.000006423 |
| 1  | 0.000000029  | -0.000000644 | -0.000005637 |
| 1  | 0.000000396  | 0.000000484  | -0.000005802 |
| 16 | -0.000001191 | 0.000000168  | -0.000001557 |
| 8  | 0.00000012   | 0.000002504  | -0.000000145 |

|    |              |              |              |
|----|--------------|--------------|--------------|
| 8  | 0.000000379  | 0.000001944  | -0.000001995 |
| 6  | 0.000000047  | 0.00000185   | -0.000000337 |
| 6  | 0.000002631  | -0.000001152 | -0.000002834 |
| 6  | -0.000002641 | 0.000000365  | -0.000002231 |
| 6  | -0.000003367 | -0.00000093  | -0.000000797 |
| 1  | -0.000000288 | -0.00000058  | 0.000000233  |
| 6  | 0.00000222   | 0.000000065  | -0.000003302 |
| 1  | 0.000000836  | 0.000002238  | -0.000002327 |
| 6  | 0.000001424  | 0.000000514  | 0.000000945  |
| 1  | 0.00000035   | -0.000001256 | 0.000000006  |
| 1  | 0.000000051  | 0.000001261  | -0.000001943 |
| 6  | -0.000000513 | -0.000000991 | -0.00000062  |
| 1  | 0.000000092  | 0.000000417  | -0.000001628 |
| 1  | -0.000000167 | -0.000000652 | -0.000000769 |
| 1  | 0.000000128  | -0.000000968 | -0.000002139 |
| 1  | -0.000000572 | 0.000001468  | 0.000000017  |
| 8  | -0.00000061  | -0.000000612 | -0.000002212 |
| 6  | -0.000000083 | -0.000001337 | 0.000001307  |
| 6  | -0.000000745 | -0.000002215 | -0.000000397 |
| 6  | -0.00000007  | -0.000003557 | -0.00000135  |
| 6  | -0.000000011 | -0.000001481 | -0.000000841 |
| 6  | -0.000000395 | -0.0000002   | -0.000001854 |
| 1  | -0.000000498 | -0.000003384 | -0.000001106 |
| 1  | -0.000000208 | -0.000001273 | 0.000001119  |
| 7  | -0.000000125 | -0.000002457 | -0.000002032 |
| 8  | 0.00000055   | 0.000001067  | 0.000000613  |
| 1  | -0.000000016 | -0.000001873 | -0.000002682 |
| 1  | -0.00000037  | -0.000003284 | 0.000000768  |
| 17 | -0.000000111 | 0.00000029   | -0.000002444 |

Zero-point correction=

0.631587 (Hartree/Particle)

Thermal correction to Energy=

0.674613

Thermal correction to Enthalpy=

0.675557

Thermal correction to Gibbs Free Energy=

0.549829

Sum of electronic and zero-point Energies=

-2998.561487

Sum of electronic and thermal Energies=

-2998.518461

Sum of electronic and thermal Enthalpies=

-2998.517516

Sum of electronic and thermal Free Energies=

-2998.643245

B-Tsg2

|    |              |              |              |
|----|--------------|--------------|--------------|
| 6  | -0.000000694 | -0.000001869 | 0.000002823  |
| 6  | -0.000000209 | 0.000001011  | -0.000001736 |
| 7  | -0.000001203 | -0.000000444 | 0.000000997  |
| 7  | 0.000000657  | 0.000000591  | -0.000000527 |
| 16 | -0.000002173 | 0.000000611  | 0.00000197   |

|    |              |              |              |
|----|--------------|--------------|--------------|
| 8  | -0.000001968 | 0.000000923  | 0.000000456  |
| 8  | -0.000002727 | 0.000000982  | 0.000001285  |
| 6  | -0.000001647 | 0.000000012  | 0.000002438  |
| 6  | -0.000000726 | -0.000000489 | 0.00000284   |
| 6  | -0.000000659 | -0.000001195 | 0.000003992  |
| 6  | -0.000001486 | -0.000001389 | 0.000004175  |
| 6  | -0.000002616 | -0.000000553 | 0.000004626  |
| 6  | -0.000002536 | 0.000000045  | 0.000003512  |
| 1  | -0.000000005 | -0.000000582 | 0.000002256  |
| 1  | 0.000000235  | -0.000001699 | 0.000003892  |
| 1  | -0.000003369 | -0.000000631 | 0.00000508   |
| 1  | -0.000003453 | 0.000000228  | 0.000003144  |
| 6  | -0.00000143  | -0.000001899 | 0.00000585   |
| 1  | -0.000001216 | -0.000001727 | 0.000006496  |
| 1  | -0.000002279 | -0.000001231 | 0.000006429  |
| 1  | -0.000000882 | -0.000001596 | 0.000005964  |
| 6  | -0.000001211 | -0.000000661 | 0.000000434  |
| 6  | -0.000000643 | -0.000000275 | 0.000002047  |
| 1  | -0.00000083  | -0.00000001  | 0.000001288  |
| 1  | -0.000000332 | 0.000000468  | 0.000000787  |
| 6  | -0.000000367 | -0.000001009 | 0.000002914  |
| 1  | -0.000001607 | -0.000000665 | 0.000003039  |
| 1  | 0.000000144  | -0.00000111  | 0.000002801  |
| 6  | -0.000000554 | -0.000001291 | 0.000004287  |
| 1  | 0.000000531  | -0.000001185 | 0.000002641  |
| 1  | -0.000000916 | -0.00000059  | 0.000002755  |
| 1  | -0.000000186 | -0.000001636 | 0.000004609  |
| 1  | -0.000001153 | -0.000001233 | 0.00000475   |
| 1  | 0.000000287  | -0.000001844 | 0.000004485  |
| 6  | 0.000000231  | 0.000000971  | -0.000002587 |
| 6  | 0.000001121  | 0.000000771  | -0.000003701 |
| 1  | -0.000000731 | 0.000001707  | -0.000002637 |
| 1  | 0.000000579  | 0.00000052   | -0.000002698 |
| 6  | 0.000000456  | 0.000001516  | -0.000004732 |
| 1  | 0.000000788  | 0.00000093   | -0.000004002 |
| 1  | 0.00000174   | 0.000000828  | -0.000003606 |
| 6  | 0.000001595  | 0.000001611  | -0.000005974 |
| 1  | 0.000001132  | 0.000001155  | -0.000004438 |
| 1  | -0.000000362 | 0.00000185   | -0.000004919 |
| 1  | 0.000001421  | 0.000001805  | -0.000006588 |
| 1  | 0.000001229  | 0.000001741  | -0.000006185 |
| 1  | 0.000002444  | 0.000001135  | -0.00000582  |
| 16 | 0.000000811  | 0.000000226  | -0.00000066  |
| 8  | 0.000000942  | -0.000001381 | -0.000000498 |



|    |              |              |              |
|----|--------------|--------------|--------------|
| 8  | 0.000002268  | -0.000000549 | -0.000001375 |
| 6  | 0.000000981  | -0.000000487 | -0.000000357 |
| 6  | -0.000000794 | -0.000000179 | 0.000000258  |
| 6  | 0.000001813  | -0.000000388 | -0.000000313 |
| 6  | -0.000000849 | -0.000000044 | 0.000000428  |
| 1  | -0.000000968 | -0.000000057 | 0.000000203  |
| 6  | 0.000001007  | -0.000000228 | -0.000000034 |
| 1  | 0.00000256   | -0.000000601 | -0.000000943 |
| 6  | 0.000000918  | -0.000000825 | 0.000000338  |
| 1  | -0.000001296 | 0.000000233  | 0.000000836  |
| 1  | 0.00000215   | -0.000000723 | -0.000000434 |
| 6  | -0.00000022  | -0.000000158 | 0.000000638  |
| 1  | -0.00000121  | 0.000000429  | 0.000000655  |
| 1  | 0.000000398  | -0.000000148 | 0.000000163  |
| 1  | -0.000000254 | -0.000000559 | 0.000001734  |
| 1  | 0.000005378  | 0.000005696  | -0.000003322 |
| 8  | -0.000001322 | 0.000000985  | -0.000002616 |
| 6  | -0.000003247 | 0.00000122   | 0.000000319  |
| 6  | -0.000003811 | 0.00000219   | -0.000001157 |
| 6  | -0.000003367 | 0.000002403  | -0.000002621 |
| 6  | -0.000002537 | 0.00000236   | -0.000003377 |
| 6  | -0.000002742 | 0.000000872  | -0.000000524 |
| 1  | -0.000004248 | 0.000002895  | -0.000003048 |
| 1  | -0.000002968 | 0.000000709  | -0.000000063 |
| 7  | -0.000006172 | -0.000001541 | 0.000002907  |
| 8  | 0.000006408  | 0.000003398  | -0.00000855  |
| 1  | -0.000002359 | 0.000002453  | -0.000004169 |
| 1  | -0.000004476 | 0.000002143  | -0.000000901 |
| 17 | -0.000000172 | 0.000001421  | -0.000003947 |
| 7  | 0.000000161  | -0.000003809 | -0.000002249 |
| 16 | 0.000003511  | -0.000002029 | 0.000000489  |
| 8  | 0.000003692  | -0.000000986 | 0.000000245  |
| 8  | 0.000001808  | -0.000001815 | 0.000001201  |
| 16 | 0.000001717  | 0.000000051  | -0.000001921 |
| 8  | 0.000004542  | -0.000000564 | -0.000002211 |
| 8  | 0.000001974  | 0.000000568  | -0.000002778 |
| 6  | 0.000003259  | -0.000001692 | 0.000000257  |
| 6  | 0.000002498  | -0.000000283 | -0.000002491 |
| 9  | 0.000003071  | -0.000001198 | 0.000002065  |
| 9  | 0.000004598  | -0.000002198 | 0.000001233  |
| 9  | 0.000004239  | -0.000001852 | -0.000000293 |
| 9  | 0.000003507  | -0.000000602 | -0.000002115 |
| 9  | 0.00000176   | -0.000000138 | -0.000001843 |
| 9  | 0.000002623  | 0.000000185  | -0.00000035  |

|                                              |                             |
|----------------------------------------------|-----------------------------|
| Zero-point correction=                       | 0.679827 (Hartree/Particle) |
| Thermal correction to Energy=                | 0.738753                    |
| Thermal correction to Enthalpy=              | 0.739697                    |
| Thermal correction to Gibbs Free Energy=     | 0.578169                    |
| Sum of electronic and zero-point Energies=   | -4825.774035                |
| Sum of electronic and thermal Energies=      | -4825.715109                |
| Sum of electronic and thermal Enthalpies=    | -4825.714165                |
| Sum of electronic and thermal Free Energies= | -4825.875693                |

B-2g

|    |             |             |             |
|----|-------------|-------------|-------------|
| 6  | -0.00000504 | 0.00000934  | -0.00001426 |
| 6  | 0.00000818  | 0.00002214  | -0.00004051 |
| 7  | 0.00001258  | -0.00004034 | -0.00003236 |
| 7  | -0.00002578 | -0.00005038 | 0.00003822  |
| 16 | 0.00000434  | -0.00000949 | 0.00002048  |
| 8  | -0.00000518 | -0.00002923 | -0.0000156  |
| 8  | -0.0000048  | -0.00001027 | -0.0000408  |
| 6  | -0.00000311 | -0.00000153 | 0.00000601  |
| 6  | -0.00000579 | 0.00001157  | 0.00000613  |
| 6  | 0.00001767  | 0.00001236  | 0.00001105  |
| 6  | 0.00000312  | 0.00002525  | -0.00000847 |
| 6  | -0.00000547 | 0.00000124  | 0.00000353  |
| 6  | 0.00001524  | -0.00000954 | -0.00002156 |
| 1  | 0.00000412  | 0.00000051  | 0.00000052  |
| 1  | 0.00000746  | 0.00002603  | 0.00001746  |
| 1  | 0.0000078   | 0.00000532  | -0.00000639 |
| 1  | 0.00000151  | -0.00000662 | -0.00001286 |
| 6  | 0.00001053  | 0.00002685  | 0.00001729  |
| 1  | 0.00001011  | 0.00002309  | 0.00000909  |
| 1  | 0.00000288  | 0.00002368  | 0.00001833  |
| 1  | 0.00001402  | 0.00002949  | 0.00001232  |
| 6  | 0.00002859  | 0.00003081  | -0.00002485 |
| 6  | 0.00001717  | 0.00001493  | -0.00001835 |
| 1  | 0.00002024  | -0.0000114  | -0.00003055 |
| 1  | 0.00001479  | -0.00000747 | -0.0000036  |
| 6  | 0.00002746  | 0.00000609  | -0.00003661 |
| 1  | 0.00002194  | 0.00001339  | -0.00001857 |
| 1  | 0.00002802  | 0.00001593  | -0.00002541 |
| 6  | 0.00004326  | 0.0000305   | -0.0000292  |
| 1  | 0.00003777  | 0.00001366  | -0.00004107 |
| 1  | 0.00003312  | 0.00001386  | -0.00003695 |
| 1  | 0.00004482  | 0.00003269  | -0.00003965 |
| 1  | 0.0000366   | 0.00003048  | -0.00002324 |
| 1  | 0.00004161  | 0.00003478  | -0.00002879 |

|    |              |              |              |
|----|--------------|--------------|--------------|
| 6  | -0.00000063  | -0.000000735 | -0.000001398 |
| 6  | -0.000001186 | -0.00000188  | -0.000000853 |
| 1  | -0.00000118  | -0.000002838 | -0.000000316 |
| 1  | -0.000001826 | -0.000001536 | 0.000001352  |
| 6  | -0.000000787 | -0.000002564 | -0.000000438 |
| 1  | -0.000000309 | -0.000002057 | -0.00000161  |
| 1  | -0.000000134 | -0.00000068  | -0.000000244 |
| 6  | -0.000001108 | -0.00000251  | -0.000001334 |
| 1  | -0.000001839 | -0.000002193 | 0.000000432  |
| 1  | -0.000001898 | -0.000003172 | -0.000000665 |
| 1  | -0.000001361 | -0.000002979 | -0.000001062 |
| 1  | -0.00000043  | -0.000002715 | -0.000002128 |
| 1  | -0.000000425 | -0.000001565 | -0.000000991 |
| 16 | 0.000001823  | 0.000001341  | -0.000000165 |
| 8  | -0.000000892 | 0.000001548  | -0.000000261 |
| 8  | 0.000000663  | -0.000000307 | 0.000000336  |
| 6  | -0.000000997 | 0.000000428  | 0.000003452  |
| 6  | -0.000002104 | -0.000001005 | 0.000000738  |
| 6  | -0.000000601 | 0.000000994  | 0.000003015  |
| 6  | -0.000001784 | 0.000000291  | 0.000003085  |
| 1  | -0.000001645 | -0.000000751 | 0.000001409  |
| 6  | -0.000003345 | 0.000000581  | 0.00000378   |
| 1  | -0.000001043 | 0.000001131  | 0.000003159  |
| 6  | -0.000002614 | -0.000000576 | 0.000004735  |
| 1  | -0.000002905 | -0.000001158 | 0.00000348   |
| 1  | -0.000002465 | 0.000000923  | 0.000004913  |
| 6  | -0.000003406 | -0.000000493 | 0.000005521  |
| 1  | -0.000003364 | 0.000000203  | 0.000005942  |
| 1  | -0.000004176 | -0.000000409 | 0.000005819  |
| 1  | -0.000004519 | -0.000000732 | 0.000004954  |
| 8  | -0.000001707 | -0.000002169 | -0.000000477 |
| 8  | 0.000002214  | -0.000000645 | -0.000002486 |

Zero-point correction=

0.537348 (Hartree/Particle)

Thermal correction to Energy=

0.574114

Thermal correction to Enthalpy=

0.575058

Thermal correction to Gibbs Free Energy=

0.462917

Sum of electronic and zero-point Energies=

-2290.458926

Sum of electronic and thermal Energies=

-2290.422161

Sum of electronic and thermal Enthalpies=

-2290.421217

Sum of electronic and thermal Free Energies=

-2290.533358

Re4

|   |              |              |              |
|---|--------------|--------------|--------------|
| 6 | -0.000000574 | -0.000000706 | -0.000000637 |
| 6 | -0.00000095  | -0.00000261  | 0.000002822  |

|    |              |              |              |
|----|--------------|--------------|--------------|
| 7  | 0.000000834  | -0.000002877 | 0.000009431  |
| 7  | 0.000007247  | 0.000003465  | -0.000009774 |
| 16 | 0.000000666  | -0.000000274 | -0.000005622 |
| 8  | -0.000000081 | 0.000000843  | 0.000001986  |
| 8  | 0.000002175  | 0.000001009  | 0.000000086  |
| 6  | 0.000000218  | -0.000000756 | 0.000001377  |
| 6  | -0.000000043 | 0.000001835  | -0.000000092 |
| 6  | -0.000001058 | 0.000000409  | -0.000000988 |
| 6  | -0.000001602 | -0.000000175 | -0.000001649 |
| 6  | -0.000001153 | -0.000000172 | -0.000001086 |
| 6  | -0.000000099 | 0.000001223  | -0.000001788 |
| 1  | -0.000000304 | 0.000000564  | 0.000000225  |
| 1  | -0.000001643 | 0.000000897  | -0.000000456 |
| 1  | -0.000001103 | -0.000000259 | -0.000001877 |
| 1  | -0.000000197 | -0.000001429 | -0.000001441 |
| 6  | -0.0000002   | 0.000001222  | -0.000001649 |
| 1  | -0.000002619 | 0.000000421  | -0.000002807 |
| 1  | -0.000002484 | 0.000001008  | -0.000002245 |
| 1  | -0.000002656 | 0.00000015   | -0.000002244 |
| 6  | -0.000001736 | 0.000002168  | -0.000001015 |
| 6  | 0.000000507  | 0.000000539  | 0.000002408  |
| 1  | 0.000001631  | 0.00000002   | 0.000002552  |
| 1  | 0.000001185  | 0.000000302  | 0.000001991  |
| 6  | -0.000000836 | 0.000002749  | 0.000003046  |
| 1  | -0.000000022 | 0.000001471  | 0.000001785  |
| 1  | -0.000000849 | 0.000002023  | 0.000001357  |
| 6  | -0.000000292 | 0.000002785  | 0.000003207  |
| 1  | 0.000000328  | 0.000002042  | 0.000003222  |
| 1  | 0.000000414  | 0.000001601  | 0.00000297   |
| 1  | -0.000000706 | 0.000003116  | 0.000003539  |
| 1  | -0.000000101 | 0.000002728  | 0.000002469  |
| 1  | -0.000001166 | 0.000002744  | 0.000002233  |
| 6  | -0.000001141 | -0.000003457 | 0.000007898  |
| 6  | -0.000000884 | 0.000002083  | -0.000004048 |
| 1  | -0.000001099 | 0.00000005   | -0.00000019  |
| 1  | -0.000000118 | 0.000000065  | -0.000000128 |
| 6  | -0.000003104 | 0.000001553  | -0.000000221 |
| 1  | -0.000001436 | 0.000000642  | 0.000000752  |
| 1  | 0.00000009   | 0.000000653  | 0.000002064  |
| 6  | -0.000001194 | 0.000001874  | 0.000001348  |
| 1  | -0.000000764 | 0.000000987  | -0.000000484 |
| 1  | -0.000000951 | 0.000000695  | -0.000000844 |
| 1  | -0.000002017 | 0.000001911  | -0.000000035 |
| 1  | -0.000001968 | 0.000002122  | 0.000000072  |

|                                              |              |              |                             |
|----------------------------------------------|--------------|--------------|-----------------------------|
| 1                                            | -0.000001612 | 0.000001881  | 0.000000439                 |
| 16                                           | 0.000001384  | -0.000001099 | 0.000001788                 |
| 8                                            | 0.000001658  | -0.000001548 | 0.000002145                 |
| 8                                            | 0.000002036  | -0.000001134 | 0.000001634                 |
| 6                                            | 0.000004026  | -0.000000302 | 0.000000105                 |
| 6                                            | -0.000001146 | -0.000003287 | 0.000002683                 |
| 6                                            | 0.000000743  | -0.000001847 | -0.000001385                |
| 6                                            | -0.000000133 | -0.000000321 | -0.000003057                |
| 1                                            | 0.000002957  | -0.00000204  | -0.000000248                |
| 6                                            | 0.000000117  | -0.00000348  | -0.000000534                |
| 1                                            | 0.000001465  | -0.000001647 | -0.000001442                |
| 6                                            | 0.000002608  | -0.000002953 | -0.000001394                |
| 1                                            | 0.00000212   | -0.000003003 | -0.000001508                |
| 1                                            | 0.000001886  | -0.000003097 | -0.000002297                |
| 6                                            | 0.000001687  | -0.000003936 | -0.000001829                |
| 9                                            | 0.00000225   | -0.000005256 | -0.000004213                |
| 9                                            | 0.000001841  | -0.00000326  | -0.00000278                 |
| 9                                            | 0.000001767  | -0.000002275 | -0.000001623                |
| Zero-point correction=                       |              |              | 0.504061 (Hartree/Particle) |
| Thermal correction to Energy=                |              |              | 0.541383                    |
| Thermal correction to Enthalpy=              |              |              | 0.542327                    |
| Thermal correction to Gibbs Free Energy=     |              |              | 0.425195                    |
| Sum of electronic and zero-point Energies=   |              |              | -2437.670864                |
| Sum of electronic and thermal Energies=      |              |              | -2437.633541                |
| Sum of electronic and thermal Enthalpies=    |              |              | -2437.632597                |
| Sum of electronic and thermal Free Energies= |              |              | -2437.749730                |

#### C-1

|    |              |              |              |
|----|--------------|--------------|--------------|
| 6  | 0.000000658  | -0.000000624 | 0.000005761  |
| 6  | 0.000000863  | -0.000001945 | -0.000000222 |
| 7  | 0.000006994  | 0.000003627  | 0.00000206   |
| 7  | -0.000004196 | 0.000000382  | -0.000006633 |
| 16 | -0.000002672 | 0.00000029   | -0.000006745 |
| 8  | -0.000001413 | -0.000004312 | 0.000002956  |
| 8  | -0.000000715 | 0.000002739  | 0.000000894  |
| 6  | -0.000005186 | 0.000000771  | -0.000001759 |
| 6  | -0.000001438 | -0.000008039 | -0.000007478 |
| 6  | -0.000003339 | -0.000002161 | 0.000005405  |
| 6  | -0.000003852 | 0.000004355  | -0.000002712 |
| 6  | -0.000002253 | -0.000003819 | -0.000002644 |
| 6  | -0.000001971 | -0.00000118  | 0.00000446   |
| 1  | -0.000000116 | 0.00000656   | 0.000000666  |
| 1  | -0.000001643 | -0.000000336 | -0.000001143 |
| 1  | -0.000003296 | -0.000000308 | 0.000000272  |

|    |              |              |              |
|----|--------------|--------------|--------------|
| 1  | -0.000002512 | -0.000000317 | -0.000000495 |
| 6  | -0.000001944 | -0.000000738 | 0.000000121  |
| 1  | -0.000003483 | -0.000001077 | -0.000000614 |
| 1  | -0.000003315 | -0.000001113 | -0.000000011 |
| 1  | -0.000002842 | -0.000000773 | -0.000000577 |
| 6  | -0.000014316 | -0.000006866 | 0.000002341  |
| 6  | 0.000001417  | 0.000001614  | -0.000003204 |
| 1  | 0.000001915  | 0.000002223  | -0.00000003  |
| 1  | -0.000000654 | 0.000001389  | -0.000000469 |
| 6  | -0.000001372 | 0.000000108  | -0.000000173 |
| 1  | -0.000000838 | 0.000000695  | -0.000001138 |
| 1  | -0.000000871 | 0.000000111  | -0.000000989 |
| 6  | -0.000001021 | 0.000001803  | -0.000002627 |
| 1  | -0.00000158  | 0.000000798  | -0.000001848 |
| 1  | -0.000002061 | 0.000000726  | -0.000002184 |
| 1  | -0.000001355 | 0.000000975  | -0.000002688 |
| 1  | -0.000000799 | 0.00000119   | -0.000002321 |
| 1  | -0.000000841 | 0.000001243  | -0.000002171 |
| 6  | 0.000004069  | 0.000000423  | 0.000003205  |
| 6  | 0.000001104  | 0.00000035   | -0.00000149  |
| 1  | 0.000000296  | 0.000000795  | -0.000000201 |
| 1  | -0.000002125 | -0.000001136 | -0.000000477 |
| 6  | 0.000001085  | 0.000000447  | -0.000000882 |
| 1  | 0.000001205  | 0.000000669  | -0.000000604 |
| 1  | 0.000001127  | 0.000000901  | -0.000000349 |
| 6  | 0.000002938  | 0.000001066  | -0.000000787 |
| 1  | 0.000002331  | 0.000000893  | 0.000000545  |
| 1  | 0.000002794  | 0.000000602  | -0.000000246 |
| 1  | 0.000002985  | 0.000001179  | -0.000000818 |
| 1  | 0.000002066  | 0.000000984  | -0.000001205 |
| 1  | 0.000002439  | 0.000001306  | -0.000001193 |
| 16 | 0.000003921  | 0.000004313  | -0.000005504 |
| 8  | 0.00000069   | -0.000004336 | 0.000003595  |
| 8  | 0.000001805  | -0.000001411 | -0.000000518 |
| 6  | 0.000000779  | 0.000001085  | 0.000002157  |
| 6  | 0.000003479  | 0.000005105  | 0.000000416  |
| 6  | -0.00000284  | -0.00000214  | -0.000001551 |
| 6  | -0.000000303 | -0.000001718 | -0.000000182 |
| 1  | 0.000002323  | -0.000001977 | 0.000000054  |
| 6  | 0.000000735  | 0.000000517  | 0.000002429  |
| 1  | 0.000000354  | 0.000000283  | 0.000001316  |
| 6  | 0.000001252  | -0.000002494 | 0.000002421  |
| 1  | 0.000001502  | -0.000000093 | 0.000001477  |
| 1  | -0.000000204 | -0.000000745 | 0.000001564  |

|    |              |              |              |
|----|--------------|--------------|--------------|
| 6  | -0.000002729 | -0.000000775 | 0.000003784  |
| 9  | 0.000002439  | 0.000000634  | 0.000001555  |
| 9  | 0.000001945  | -0.000000318 | 0.000000822  |
| 9  | 0.000003367  | -0.000001903 | 0.000002304  |
| 79 | 0.000005429  | -0.000002206 | 0.000003483  |
| 6  | 0.000001342  | 0.000006231  | -0.000000155 |
| 6  | -0.000000971 | 0.000002474  | -0.000002693 |
| 6  | -0.000000857 | -0.000001877 | 0.000003568  |
| 1  | 0.00000147   | -0.000001003 | 0.000001247  |
| 1  | -0.000000143 | -0.000000103 | 0.000000202  |
| 7  | 0.000001919  | -0.000006055 | 0.000001406  |
| 7  | -0.000005486 | 0.00000184   | -0.000005045 |
| 6  | 0.000001124  | -0.000000591 | 0.000000654  |
| 6  | 0.000000715  | -0.000001989 | 0.000000046  |
| 6  | 0.000001338  | 0.000000981  | 0.000003566  |
| 6  | 0.000002104  | 0.000000523  | 0.000001914  |
| 6  | -0.000000497 | -0.000001996 | 0.000002001  |
| 6  | 0.000000621  | -0.000000474 | 0.000000274  |
| 1  | 0.000002388  | -0.000000805 | 0.000001603  |
| 1  | -0.000000168 | 0.000000208  | 0.000001267  |
| 1  | 0.000001582  | -0.00000121  | 0.00000261   |
| 6  | 0.000000677  | -0.000004087 | -0.00000481  |
| 6  | -0.000002406 | 0.000000969  | 0.000001751  |
| 6  | 0.000000053  | 0.000002324  | -0.000000824 |
| 6  | -0.000000504 | 0.0000012    | -0.00000089  |
| 6  | -0.000000381 | -0.000000307 | -0.000000799 |
| 6  | 0.000000033  | 0.000000179  | -0.000002451 |
| 1  | -0.000001558 | 0.000000458  | -0.000001557 |
| 1  | 0.000000753  | 0.000000504  | -0.000001888 |
| 1  | -0.000000933 | 0.000001143  | -0.000002232 |
| 6  | 0.000000088  | 0.000002465  | 0.00000247   |
| 6  | -0.000001547 | -0.000002562 | -0.000002025 |
| 6  | -0.000001679 | -0.000003066 | -0.000003479 |
| 1  | -0.000001932 | 0.000002459  | 0.000000958  |
| 1  | -0.000000639 | 0.000000058  | -0.000000821 |
| 1  | -0.000000968 | -0.000000802 | -0.000000932 |
| 1  | -0.000003127 | 0.000001561  | -0.000001137 |
| 1  | -0.000001336 | -0.000000099 | -0.000001076 |
| 1  | -0.00000043  | 0.000000529  | 0.000001405  |
| 1  | -0.000002065 | -0.000000847 | -0.000000504 |
| 6  | 0.00000106   | 0.000001325  | 0.000001241  |
| 6  | 0.00000206   | 0.000001105  | -0.00000158  |
| 6  | 0.000001481  | 0.000001459  | -0.000002282 |
| 1  | 0.00000126   | 0.000000793  | 0.000000229  |

|   |              |              |              |
|---|--------------|--------------|--------------|
| 1 | 0.000001193  | 0.000001225  | -0.000001064 |
| 1 | 0.000001398  | 0.000000994  | -0.000000989 |
| 1 | 0.00000096   | 0.000001955  | -0.000002422 |
| 1 | 0.000000965  | 0.000000793  | -0.000001386 |
| 1 | 0.000000814  | 0.000001121  | -0.000000732 |
| 1 | 0.000001849  | 0.000000903  | -0.000001307 |
| 6 | -0.000004416 | 0.000001589  | 0.000002665  |
| 6 | 0.000000632  | -0.000000841 | 0.00000114   |
| 6 | 0.000003042  | -0.000003057 | 0.000001365  |
| 1 | -0.000000672 | -0.000000466 | 0.000003035  |
| 1 | -0.000002386 | 0.000000329  | 0.000001253  |
| 1 | -0.000001098 | -0.00000136  | 0.000001191  |
| 1 | -0.000001327 | -0.000002603 | 0.000002768  |
| 1 | -0.000000524 | -0.000000792 | 0.000001775  |
| 1 | -0.000001157 | -0.000000853 | 0.000001928  |
| 1 | -0.000001223 | -0.000001569 | 0.000001289  |
| 6 | 0.000004371  | -0.000003146 | 0.000001493  |
| 6 | 0.000000699  | 0.000000999  | 0.000001727  |
| 6 | 0.00000126   | 0.00000245   | 0.000000789  |
| 1 | 0.000000806  | -0.00000034  | 0.000000632  |
| 1 | 0.000001704  | 0.000000055  | 0.00000118   |
| 1 | 0.00000243   | 0.000000224  | 0.00000103   |
| 1 | 0.000002652  | -0.000000246 | 0.000001162  |
| 1 | 0.000002036  | 0.000000987  | 0.000000596  |
| 1 | 0.000002433  | 0.000000117  | 0.00000133   |
| 1 | 0.000002609  | 0.000000321  | 0.000000473  |

Zero-point correction=

1.078529 (Hartree/Particle)

Thermal correction to Energy=

1.149775

Thermal correction to Enthalpy=

1.150719

Thermal correction to Gibbs Free Energy=

0.958959

Sum of electronic and zero-point Energies=

-3732.527398

Sum of electronic and thermal Energies=

-3732.456153

Sum of electronic and thermal Enthalpies=

-3732.455208

Sum of electronic and thermal Free Energies=

-3732.646968

C-2

|    |              |              |              |
|----|--------------|--------------|--------------|
| 6  | 0.000004427  | 0.000000801  | 0.000001476  |
| 6  | -0.000000785 | -0.000000612 | -0.000000449 |
| 7  | -0.000006379 | -0.000001982 | -0.000002824 |
| 7  | 0.000007112  | -0.000001594 | 0.000013672  |
| 16 | 0.000000909  | -0.000001963 | -0.000002955 |
| 8  | 0.000000775  | 0.00000234   | -0.000001415 |
| 8  | 0.000001296  | -0.000001482 | -0.000003333 |
| 6  | -0.000002317 | 0.000002838  | 0.000000534  |



|    |              |              |              |
|----|--------------|--------------|--------------|
| 6  | -0.000001488 | -0.000002092 | -0.000001763 |
| 6  | -0.000000183 | 0.000000595  | -0.000005241 |
| 6  | -0.000002924 | -0.000000527 | -0.000003501 |
| 6  | -0.000002569 | -0.000001075 | -0.000001982 |
| 6  | 0.000000024  | -0.000001266 | -0.000004847 |
| 1  | -0.000001611 | 0.000002267  | -0.000002724 |
| 1  | -0.000003404 | 0.000000271  | -0.000000914 |
| 1  | -0.00000254  | 0.00000001   | -0.000004345 |
| 1  | -0.000000742 | 0.000000381  | -0.000004026 |
| 6  | -0.000003328 | -0.000001415 | -0.000003503 |
| 1  | -0.000003947 | 0.000000261  | -0.000003331 |
| 1  | -0.000003738 | 0.000000323  | -0.000003861 |
| 1  | -0.000004137 | 0.000000416  | -0.000002541 |
| 6  | -0.000003374 | -0.000004314 | 0.000000094  |
| 6  | -0.000003969 | 0.000000834  | -0.000003093 |
| 1  | 0.000002367  | 0.000001187  | -0.000003523 |
| 1  | 0.000000256  | 0.000000936  | -0.000002094 |
| 6  | -0.000001572 | 0.000000129  | -0.000002126 |
| 1  | -0.000000608 | -0.000000044 | -0.000003134 |
| 1  | -0.000002445 | 0.000000032  | -0.000001594 |
| 6  | -0.000003632 | 0.000000152  | -0.000002893 |
| 1  | -0.00000133  | -0.00000035  | -0.00000179  |
| 1  | -0.000001724 | -0.000000315 | -0.000002885 |
| 1  | -0.000002952 | -0.000000069 | -0.000002643 |
| 1  | -0.000002906 | -0.000000066 | -0.000002754 |
| 1  | -0.000003215 | 0.000000246  | -0.00000136  |
| 6  | -0.000001281 | 0.000000313  | -0.000001523 |
| 6  | 0.000001733  | 0.000000526  | 0.000000937  |
| 1  | 0.000000627  | 0.000000859  | 0.000001332  |
| 1  | 0.000001463  | -0.000000388 | 0.000003179  |
| 6  | 0.000002397  | 0.000000027  | 0.00000131   |
| 1  | 0.000001812  | -0.000000495 | 0.000000297  |
| 1  | 0.000001084  | -0.000000264 | -0.000000017 |
| 6  | 0.000002792  | -0.000000217 | 0.000000387  |
| 1  | 0.000001568  | -0.000000065 | 0.000000966  |
| 1  | 0.000001801  | 0.000000116  | 0.000001709  |
| 1  | 0.000003109  | 0.000000025  | 0.000000904  |
| 1  | 0.000003232  | -0.000000097 | 0.000000331  |
| 1  | 0.000002749  | -0.000000055 | -0.000000089 |
| 16 | -0.000007671 | -0.000003784 | -0.000009297 |
| 8  | -0.00000253  | 0.000000962  | 0.000002035  |
| 8  | 0.000001527  | 0.000001831  | -0.000000695 |
| 6  | -0.000002675 | 0.000001642  | 0.000002508  |
| 6  | -0.000002403 | 0.000001321  | -0.000002167 |

|    |              |              |              |
|----|--------------|--------------|--------------|
| 6  | -0.00000817  | -0.00000529  | 0.000001533  |
| 6  | -0.000003096 | -0.00000393  | 0.00000558   |
| 1  | -0.00000933  | 0.00000085   | 0.000001099  |
| 6  | -0.000002959 | 0.000000619  | 0.00000222   |
| 1  | -0.000001416 | 0.000000082  | 0.000002203  |
| 6  | -0.000001897 | -0.000000047 | -0.000000046 |
| 1  | -0.000002907 | 0.000000169  | -0.000000417 |
| 1  | -0.000002037 | 0.00000003   | 0.000002457  |
| 6  | -0.000002175 | -0.000000784 | 0.000001747  |
| 9  | -0.000002401 | 0.000000458  | 0.000000917  |
| 9  | -0.000003793 | 0.000000243  | 0.00000208   |
| 9  | -0.00000385  | 0.000000311  | 0.00000023   |
| 79 | -0.000005353 | 0.000000881  | -0.00000362  |
| 6  | 0.00000508   | -0.000000336 | 0.000001892  |
| 6  | 0.000002968  | -0.000000371 | 0.000001433  |
| 6  | 0.000002554  | 0.000001205  | 0.000001798  |
| 1  | 0.000000696  | -0.000000225 | 0.000000949  |
| 1  | 0.000002347  | 0.00000045   | 0.000001768  |
| 7  | 0.000000316  | 0.000000408  | 0.000000098  |
| 7  | 0.00000024   | -0.000002095 | 0.000001351  |
| 6  | 0.000003234  | -0.000001053 | 0.000001347  |
| 6  | 0.000004156  | 0.000001314  | -0.000000587 |
| 6  | 0.000000056  | -0.000000042 | 0.000001944  |
| 6  | 0.000003776  | 0.000000042  | 0.00000115   |
| 6  | 0.000002897  | 0.000001075  | 0.000000858  |
| 6  | 0.000004102  | 0.000000527  | 0.00000066   |
| 1  | 0.000004225  | -0.000000256 | 0.000000466  |
| 1  | 0.000003172  | -0.000000781 | 0.000002819  |
| 1  | 0.000004004  | -0.000000004 | 0.000001274  |
| 6  | -0.000003592 | -0.000001317 | -0.00000063  |
| 6  | -0.000000164 | -0.0000012   | 0.000002607  |
| 6  | 0.000001873  | 0.000001678  | -0.000001199 |
| 6  | -0.000001501 | 0.000000585  | -0.000000453 |
| 6  | -0.000001374 | 0.000000003  | 0.000000851  |
| 6  | -0.000003189 | -0.000001304 | -0.000000903 |
| 1  | -0.000002546 | 0.000000151  | 0.00000102   |
| 1  | -0.000000544 | -0.000000347 | -0.000001422 |
| 1  | -0.000002506 | 0.000000543  | -0.00000044  |
| 6  | -0.000001555 | 0.000001924  | 0.000002548  |
| 6  | -0.000001127 | -0.000000646 | 0.000003042  |
| 6  | -0.000001026 | -0.000001417 | 0.000000124  |
| 1  | -0.000000465 | 0.000000059  | 0.000000948  |
| 1  | -0.000000844 | 0.000000625  | 0.000002861  |
| 1  | -0.000000075 | 0.000000233  | 0.000003144  |

|                                                     |              |              |                                    |
|-----------------------------------------------------|--------------|--------------|------------------------------------|
| 1                                                   | -0.000001904 | 0.000000064  | 0.000002595                        |
| 1                                                   | -0.000001593 | 0.000000537  | 0.000001628                        |
| 1                                                   | -0.000002368 | 0.000000725  | 0.000002145                        |
| 1                                                   | -0.00000156  | 0.000000501  | 0.000002825                        |
| 6                                                   | -0.000000769 | 0.000000609  | -0.000000983                       |
| 6                                                   | 0.000000807  | 0.000000035  | -0.000001835                       |
| 6                                                   | 0.000000563  | -0.000000215 | -0.000000815                       |
| 1                                                   | 0.000001045  | -0.00000021  | -0.000000497                       |
| 1                                                   | 0.0000001    | -0.00000032  | -0.000001396                       |
| 1                                                   | 0.000001513  | -0.000000394 | -0.000002143                       |
| 1                                                   | 0.00000012   | -0.000000092 | -0.000001851                       |
| 1                                                   | 0.000000882  | 0.000000007  | 0.000000059                        |
| 1                                                   | 0.000000531  | 0.000000117  | -0.000000758                       |
| 1                                                   | 0.000001401  | -0.000000269 | -0.000000836                       |
| 6                                                   | 0.000002656  | -0.000001197 | 0.00000068                         |
| 6                                                   | 0.000002347  | 0.000002416  | 0.000002684                        |
| 6                                                   | 0.000002039  | 0.000000402  | 0.000004178                        |
| 1                                                   | 0.000001206  | 0.000000331  | 0.000003257                        |
| 1                                                   | -0.000000611 | -0.00000041  | 0.000002561                        |
| 1                                                   | 0.000000336  | -0.000000155 | 0.00000314                         |
| 1                                                   | 0.000001313  | -0.000000104 | 0.000003262                        |
| 1                                                   | 0.00000276   | 0.000000128  | 0.000003408                        |
| 1                                                   | 0.00000231   | -0.000000012 | 0.000003455                        |
| 1                                                   | 0.000001779  | -0.000000011 | 0.000004019                        |
| 6                                                   | 0.000001148  | 0.000001037  | 0.00000159                         |
| 6                                                   | 0.000004118  | -0.000000786 | -0.000000963                       |
| 6                                                   | 0.000004461  | -0.00000155  | -0.000002435                       |
| 1                                                   | 0.000002355  | 0.000000428  | -0.00000013                        |
| 1                                                   | 0.000004014  | 0.000000234  | 0.000000707                        |
| 1                                                   | 0.000003898  | 0.000000062  | -0.000000765                       |
| 1                                                   | 0.000004661  | 0.000000216  | -0.00000032                        |
| 1                                                   | 0.000002527  | -0.000000434 | -0.000001449                       |
| 1                                                   | 0.000003166  | -0.000000071 | -0.000001045                       |
| 1                                                   | 0.000003029  | 0.000000183  | -0.000001535                       |
| <b>Zero-point correction=</b>                       |              |              | <b>1.077946 (Hartree/Particle)</b> |
| <b>Thermal correction to Energy=</b>                |              |              | <b>1.149372</b>                    |
| <b>Thermal correction to Enthalpy=</b>              |              |              | <b>1.150316</b>                    |
| <b>Thermal correction to Gibbs Free Energy=</b>     |              |              | <b>0.956771</b>                    |
| <b>Sum of electronic and zero-point Energies=</b>   |              |              | <b>-3732.516739</b>                |
| <b>Sum of electronic and thermal Energies=</b>      |              |              | <b>-3732.445312</b>                |
| <b>Sum of electronic and thermal Enthalpies=</b>    |              |              | <b>-3732.444368</b>                |
| <b>Sum of electronic and thermal Free Energies=</b> |              |              | <b>-3732.637914</b>                |

C-TS1a

|    |              |              |              |
|----|--------------|--------------|--------------|
| 6  | -0.000000455 | 0.000000296  | 0.00000016   |
| 6  | -0.000000204 | -0.000000394 | 0.000000578  |
| 7  | 0.000000472  | -0.000000393 | 0.000001042  |
| 7  | -0.000000309 | -0.000000457 | 0.000001043  |
| 16 | 0.000000659  | 0.000000158  | 0.000000121  |
| 8  | 0.000000763  | -0.000000153 | 0.000000225  |
| 8  | 0.000000517  | 0.00000019   | -0.000000578 |
| 6  | 0.000001166  | -0.000000159 | 0.000000086  |
| 6  | 0.000001208  | -0.000000321 | 0.000000921  |
| 6  | 0.000001663  | -0.000000482 | 0.000001162  |
| 6  | 0.000001574  | -0.000000708 | 0.000001413  |
| 6  | 0.000001486  | -0.000000525 | 0.000001078  |
| 6  | 0.000001163  | -0.000000487 | 0.000000794  |
| 1  | 0.000001263  | -0.000000292 | 0.000000637  |
| 1  | 0.00000182   | -0.000000569 | 0.000001304  |
| 1  | 0.000001538  | -0.000000543 | 0.000001288  |
| 1  | 0.000001068  | -0.000000268 | 0.000000568  |
| 6  | 0.000001941  | -0.000000641 | 0.000001678  |
| 6  | 0.000000158  | -0.000000428 | 0.000000815  |
| 6  | -0.000000511 | -0.000000257 | 0.000000753  |
| 1  | 0.000000096  | -0.000000381 | 0.000000755  |
| 1  | -0.000000149 | -0.000000293 | 0.000001017  |
| 6  | -0.000000421 | -0.000000316 | 0.000000845  |
| 1  | -0.000000407 | -0.000000245 | 0.000000189  |
| 1  | -0.000000319 | -0.000000005 | 0.000000661  |
| 6  | -0.000000846 | -0.000000242 | 0.000000838  |
| 1  | -0.000000585 | -0.000000418 | 0.000001236  |
| 1  | -0.000000344 | -0.000000544 | 0.00000111   |
| 1  | -0.000001009 | -0.000000439 | 0.000001114  |
| 1  | -0.000000686 | -0.000000231 | 0.000000644  |
| 1  | -0.000001147 | -0.000000252 | 0.000000684  |
| 6  | -0.000000726 | -0.000000274 | 0.000000471  |
| 6  | -0.000001256 | -0.000000212 | 0.000001239  |
| 1  | -0.000000881 | -0.000000508 | 0.000001322  |
| 1  | -0.000001061 | -0.00000004  | 0.000000826  |
| 6  | -0.000001581 | -0.000000419 | 0.000000639  |
| 1  | -0.000000987 | -0.000000076 | 0.000000921  |
| 1  | -0.000001373 | -0.000000049 | 0.000000384  |
| 6  | -0.000001917 | -0.000000376 | 0.000000677  |
| 1  | -0.000001771 | -0.000000231 | 0.000000736  |
| 1  | -0.00000173  | -0.000000394 | 0.000001243  |
| 1  | -0.000002288 | -0.000000235 | 0.000000736  |
| 1  | -0.0000018   | -0.000000177 | 0.000000763  |
| 1  | -0.000001929 | -0.000000054 | 0.000000286  |

|    |              |              |              |
|----|--------------|--------------|--------------|
| 16 | -0.000000026 | -0.000000035 | 0.000001097  |
| 8  | 0.000000404  | -0.000000413 | 0.000000962  |
| 8  | -0.000000578 | -0.000000544 | 0.000001103  |
| 6  | 0.000000024  | -0.000000755 | 0.000001435  |
| 6  | 0.000000465  | -0.000000512 | 0.00000017   |
| 6  | -0.000000143 | -0.000000865 | 0.000002041  |
| 6  | 0.000000136  | -0.000000754 | 0.000002118  |
| 1  | 0.000000303  | -0.000000605 | 0.000001421  |
| 6  | -0.00000006  | -0.000000089 | 0.000002382  |
| 1  | -0.000000607 | -0.000000675 | 0.000001805  |
| 6  | -0.000000264 | -0.000001015 | 0.000002503  |
| 1  | 0.000000481  | -0.000000854 | 0.000002204  |
| 1  | -0.000000548 | -0.000000948 | 0.000002568  |
| 6  | 0            | -0.000001143 | 0.000002851  |
| 1  | -0.000000345 | -0.000001192 | 0.000000301  |
| 1  | 0.000000023  | -0.000001205 | 0.0000003    |
| 1  | 0.000000072  | -0.000001122 | 0.000002851  |
| 79 | 0.000000331  | 0.000001076  | -0.000000724 |
| 6  | -0.000000349 | -0.000000356 | -0.000001471 |
| 6  | -0.000000331 | 0.000000734  | -0.000001987 |
| 6  | 0.000000294  | 0.000000387  | -0.000001415 |
| 1  | 0.000000226  | 0.000000868  | -0.000001976 |
| 1  | -0.000000028 | 0.000000619  | -0.000002016 |
| 7  | 0.000000034  | 0.000000892  | -0.000001146 |
| 7  | 0.000000033  | 0.000000689  | -0.000001155 |
| 6  | -0.000000181 | 0.000000008  | -0.000001487 |
| 6  | -0.000000415 | 0.000000427  | -0.000001217 |
| 6  | 0.000000176  | 0.000000523  | -0.000001315 |
| 6  | -0.000001008 | 0.000000514  | -0.000000917 |
| 6  | -0.000000088 | 0.000000464  | -0.000001094 |
| 6  | -0.000000474 | 0.000000034  | -0.000001028 |
| 1  | -0.000001023 | 0.000000541  | -0.000000671 |
| 1  | 0.000000247  | 0.000000382  | -0.000000931 |
| 1  | -0.000000633 | 0.000000381  | -0.000000852 |
| 6  | 0.000000641  | 0.000000682  | -0.000000766 |
| 6  | 0.000000722  | 0.000000307  | -0.000001027 |
| 6  | 0.000000166  | 0.000000865  | -0.000001287 |
| 6  | 0.000001151  | 0.000000061  | -0.000000764 |
| 6  | 0.00000002   | 0.000000414  | -0.00000105  |
| 6  | 0.000000674  | 0.00000043   | -0.000001106 |
| 1  | 0.000001318  | 0.000000435  | -0.000000936 |
| 1  | -0.000000024 | 0.000000418  | -0.000001093 |
| 1  | 0.000000715  | 0.000000352  | -0.000000858 |
| 6  | 0.000001074  | 0.000000171  | -0.000000842 |

|   |              |              |              |
|---|--------------|--------------|--------------|
| 6 | 0.000001454  | 0.000000554  | -0.000001486 |
| 6 | 0.000001496  | 0.000000026  | -0.000000746 |
| 1 | 0.000000867  | 0.000000555  | -0.000001453 |
| 1 | 0.000001375  | 0.000000058  | -0.000001663 |
| 1 | 0.000001776  | 0.000000543  | -0.000001499 |
| 1 | 0.000001657  | 0.000000382  | -0.000001357 |
| 1 | 0.00000138   | 0.000000085  | -0.000000171 |
| 1 | 0.000001558  | 0.000000199  | -0.000000058 |
| 1 | 0.000001598  | 0.000000254  | -0.000000674 |
| 6 | -0.000000073 | 0.000000289  | -0.000001173 |
| 6 | -0.000001102 | 0.000000625  | -0.000001055 |
| 6 | -0.000000522 | 0.000000843  | -0.000001589 |
| 1 | -0.000000743 | 0.000000685  | -0.000001114 |
| 1 | -0.000000535 | 0.000000033  | -0.000000507 |
| 1 | -0.000001146 | 0.000000045  | -0.000001075 |
| 1 | -0.000000642 | 0.000000197  | -0.000000773 |
| 1 | -0.000000331 | 0.000000806  | -0.000001939 |
| 1 | -0.000000645 | 0.000000501  | -0.000001706 |
| 1 | -0.000000853 | 0.000000717  | -0.000001759 |
| 6 | 0.000000689  | 0.000000466  | -0.000001026 |
| 6 | 0.000001035  | 0.000000382  | -0.000000865 |
| 6 | 0.000000073  | 0.000000696  | -0.00000017  |
| 1 | 0.000000438  | 0.000000452  | -0.000001383 |
| 1 | 0.000000739  | 0.000000036  | -0.000000597 |
| 1 | 0.000001268  | 0.000000352  | -0.000000941 |
| 1 | 0.000000819  | 0.000000265  | -0.000000097 |
| 1 | 0.000000535  | 0.000000793  | -0.000001921 |
| 1 | 0.000000509  | 0.000000601  | -0.000001814 |
| 1 | 0.000001056  | 0.000000583  | -0.000001735 |
| 6 | -0.000000975 | 0.000000549  | -0.000000934 |
| 6 | -0.00000129  | 0.000000561  | -0.000001554 |
| 6 | -0.000001254 | 0.000000034  | -0.000000081 |
| 1 | -0.000000712 | 0.000000304  | -0.000000988 |
| 1 | -0.000001079 | 0.000000079  | -0.000001805 |
| 1 | -0.000001473 | 0.000000688  | -0.000001527 |
| 1 | -0.00000152  | 0.000000613  | -0.000001446 |
| 1 | -0.000000826 | 0.000000237  | -0.000000335 |
| 1 | -0.000001543 | 0.000000125  | -0.000000892 |
| 1 | -0.000001484 | 0.000000346  | -0.000000799 |
| 6 | -0.000000158 | -0.000000015 | 0.000000201  |
| 6 | 0.000000483  | -0.000000138 | 0.000000158  |
| 6 | -0.000000191 | -0.000000215 | 0.000000203  |
| 6 | -0.000000464 | -0.000000078 | 0.000000275  |
| 6 | -0.000000055 | 0.000000033  | 0.000000359  |

|                                              |              |              |                             |
|----------------------------------------------|--------------|--------------|-----------------------------|
| 1                                            | -0.000000029 | -0.000000102 | 0.000000284                 |
| 1                                            | 0.000000018  | 0.000000168  | 0.000000031                 |
| 7                                            | -0.000000446 | -0.000000009 | 0.000000083                 |
| 8                                            | -0.000000683 | -0.000000706 | -0.000000239                |
| 1                                            | -0.000000806 | -0.000000118 | 0.000000311                 |
| 1                                            | 0.000000501  | -0.000000059 | 0.000000084                 |
| 17                                           | -0.000001394 | 0.000000005  | 0.000000017                 |
| 9                                            | 0.000002425  | -0.000000817 | 0.000001549                 |
| 9                                            | 0.000002183  | -0.000000774 | 0.000001712                 |
| 9                                            | 0.000001796  | -0.000000748 | 0.000002065                 |
| Zero-point correction=                       |              |              | 1.162752 (Hartree/Particle) |
| Thermal correction to Energy=                |              |              | 1.240973                    |
| Thermal correction to Enthalpy=              |              |              | 1.241918                    |
| Thermal correction to Gibbs Free Energy=     |              |              | 1.033869                    |
| Sum of electronic and zero-point Energies=   |              |              | -4515.456819                |
| Sum of electronic and thermal Energies=      |              |              | -4515.378598                |
| Sum of electronic and thermal Enthalpies=    |              |              | -4515.377654                |
| Sum of electronic and thermal Free Energies= |              |              | -4515.585702                |

#### C-1a

|    |              |              |              |
|----|--------------|--------------|--------------|
| 6  | -0.000016957 | -0.000006779 | 0.000002233  |
| 6  | -0.000006727 | 0.000000828  | -0.000007532 |
| 7  | 0.000024407  | 0.000005589  | -0.000004649 |
| 7  | 0.000009785  | -0.000007601 | -0.000003593 |
| 16 | 0.000002587  | 0.000001659  | 0.000004448  |
| 8  | 0.000000947  | 0.000001417  | -0.000001728 |
| 8  | -0.000000398 | -0.000001653 | -0.000002555 |
| 6  | -0.000000064 | 0.000000664  | 0.000002036  |
| 6  | 0.000001188  | -0.000001344 | -0.000000357 |
| 6  | 0.000001031  | -0.00000302  | 0.000001474  |
| 6  | 0.000001672  | 0.000003016  | 0.000004356  |
| 6  | 0.00000395   | -0.000002066 | 0.000001302  |
| 6  | -0.000001395 | -0.000002462 | -0.000001062 |
| 1  | 0.000000712  | -0.000000147 | 0.000000388  |
| 1  | 0.000001836  | -0.000000106 | 0.000000882  |
| 1  | -0.000000054 | -0.000000494 | 0.000000659  |
| 1  | 0.000001492  | 0.000000204  | 0.00000119   |
| 6  | 0.000001557  | -0.000001909 | 0.000002081  |
| 6  | -0.00000091  | -0.000000433 | 0.000003244  |
| 6  | 0.000000287  | 0.000000411  | -0.000001703 |
| 1  | 0.000001335  | 0.000000561  | -0.00000109  |
| 1  | -0.000000078 | -0.000000667 | 0.000000183  |
| 6  | -0.000000487 | 0.000000031  | 0.000000093  |
| 1  | -0.000000424 | 0.000000274  | 0.000000436  |

|    |              |              |              |
|----|--------------|--------------|--------------|
| 1  | -0.00000848  | 0.00000542   | 0.00000463   |
| 6  | -0.00000255  | 0.00000031   | 0.00000418   |
| 1  | -0.00000858  | -0.00000107  | 0.00000607   |
| 1  | -0.00000556  | -0.00000047  | 0.00000213   |
| 1  | -0.00000773  | 0.00000111   | 0.00000087   |
| 1  | -0.00000514  | 0.00000301   | -0.0000001   |
| 1  | -0.00001259  | 0.00000499   | -0.00000157  |
| 6  | -0.00001674  | -0.00001776  | 0.000004108  |
| 6  | -0.00000839  | -0.00001047  | 0.000001239  |
| 1  | -0.00002104  | 0.00000379   | 0.000001089  |
| 1  | -0.00000207  | 0.00000437   | 0.000001259  |
| 6  | -0.00002094  | 0.00000423   | 0.000000705  |
| 1  | -0.00000876  | -0.00000721  | 0.000000992  |
| 1  | -0.00000321  | -0.00000124  | 0.000001017  |
| 6  | -0.00001762  | 0.00000002   | 0.000000852  |
| 1  | -0.00001724  | 0.000000193  | 0.000000675  |
| 1  | -0.00001903  | 0.000000039  | 0.000001045  |
| 1  | -0.00002195  | 0.000000392  | 0.000000901  |
| 1  | -0.00001756  | 0.000000227  | 0.000000681  |
| 1  | -0.00001961  | 0.000000475  | 0.000000175  |
| 16 | -0.00005009  | 0.000005205  | 0.000007246  |
| 8  | -0.00002104  | -0.00002809  | 0.000002085  |
| 8  | -0.00001096  | -0.00000709  | 0.00000065   |
| 6  | 0.00000128   | -0.000000054 | 0.000000473  |
| 6  | -0.00002079  | -0.00002675  | -0.000001528 |
| 6  | 0.00001751   | -0.00001107  | 0.000003448  |
| 6  | 0.00003514   | -0.0000037   | 0.000003577  |
| 1  | -0.00000112  | -0.00001439  | 0.00000208   |
| 6  | -0.00002339  | -0.00004076  | 0.000002178  |
| 1  | -0.00000521  | -0.00000128  | 0.000001072  |
| 6  | -0.00002661  | 0.00000515   | 0.000002958  |
| 1  | -0.00000433  | -0.00001228  | 0.000002095  |
| 1  | -0.00000097  | -0.00001099  | 0.000002425  |
| 6  | 0.000000657  | -0.000000796 | 0.000000532  |
| 1  | -0.00000609  | -0.00001771  | 0.00000308   |
| 1  | 0.00000047   | -0.00002176  | 0.000003151  |
| 1  | -0.000000938 | -0.00002161  | 0.000002931  |
| 79 | 0.00002857   | 0.000004781  | 0.000006919  |
| 6  | -0.00001276  | -0.00005837  | -0.000002513 |
| 6  | 0.00000184   | 0.000003049  | -0.000002256 |
| 6  | 0.00001001   | -0.00003008  | 0.000000358  |
| 1  | 0.0000005    | 0.000000702  | -0.000001295 |
| 1  | 0.00000029   | 0.000001388  | -0.000001853 |
| 7  | -0.000000099 | 0.00000565   | -0.000002816 |



|   |              |              |              |
|---|--------------|--------------|--------------|
| 7 | -0.000005121 | -0.000000978 | -0.000002217 |
| 6 | 0.000001309  | 0.000001731  | -0.000002205 |
| 6 | -0.000000013 | 0.000000817  | 0.000001378  |
| 6 | -0.000000289 | -0.000003048 | -0.000002438 |
| 6 | -0.000001236 | -0.00000106  | -0.000001554 |
| 6 | 0.000000956  | 0.000001086  | 0.000001198  |
| 6 | -0.000000572 | 0.000002409  | -0.000001613 |
| 1 | -0.000001122 | 0.000000761  | -0.000000662 |
| 1 | -0.000000128 | 0.00000016   | -0.00000074  |
| 1 | -0.000000762 | 0.0000005    | -0.000000915 |
| 6 | 0.000005439  | 0.000002617  | -0.000002998 |
| 6 | 0.000000389  | 0.000000279  | 0.00000194   |
| 6 | 0.000000915  | 0.000000903  | -0.000000263 |
| 6 | -0.000000426 | -0.000000738 | -0.000002168 |
| 6 | 0.000000366  | 0.00000082   | 0.000000002  |
| 6 | 0.000000838  | 0.000000707  | -0.000001568 |
| 1 | 0.000001399  | 0.000000025  | -0.000000846 |
| 1 | 0.000000555  | 0.000000264  | -0.000000919 |
| 1 | 0.000001014  | 0.000000052  | -0.000000541 |
| 6 | -0.000000162 | 0.000000864  | -0.000004064 |
| 6 | 0.000002597  | 0.000000782  | -0.000000996 |
| 6 | 0.000004481  | 0.000000548  | 0.000001238  |
| 1 | -0.000001249 | 0.000000389  | -0.000001476 |
| 1 | 0.000001322  | 0.00000031   | -0.000001532 |
| 1 | 0.00000198   | 0.000000111  | -0.000001627 |
| 1 | 0.000001394  | 0.000000696  | -0.000001242 |
| 1 | 0.000001506  | -0.000000554 | -0.000002947 |
| 1 | 0.000001009  | -0.000001137 | 0.00000035   |
| 1 | 0.000001431  | 0.000000321  | -0.000001235 |
| 6 | 0.000001303  | 0.000001018  | -0.000000223 |
| 6 | -0.000002432 | 0.000000162  | -0.000001369 |
| 6 | -0.000001732 | 0.00000047   | -0.000001608 |
| 1 | 0.000000931  | 0.00000073   | -0.000000998 |
| 1 | -0.00000155  | 0.000001365  | 0.000000139  |
| 1 | -0.000000679 | 0.00000099   | -0.000000906 |
| 1 | -0.000000909 | 0.000000727  | 0.000000642  |
| 1 | 0.000000313  | 0.000000942  | -0.000001636 |
| 1 | 0.000000252  | 0.000001459  | -0.000001493 |
| 1 | -0.000001171 | 0.000001146  | -0.000001261 |
| 6 | 0.000000683  | 0.000001293  | -0.000000082 |
| 6 | 0.000000724  | 0.000000629  | -0.000001626 |
| 6 | 0.000000511  | 0.000000436  | -0.000002312 |
| 1 | 0.000000781  | -0.000000262 | -0.000001472 |
| 1 | 0.000000206  | 0.000000036  | -0.000001552 |

|    |              |              |              |
|----|--------------|--------------|--------------|
| 1  | 0.000001935  | -0.000000169 | -0.000000782 |
| 1  | 0.000000803  | 0.000001062  | -0.000001555 |
| 1  | 0.000000333  | 0.000000721  | -0.00000208  |
| 1  | 0.000000757  | 0.000000817  | -0.000001762 |
| 1  | 0.000000851  | 0.000000787  | -0.000001597 |
| 6  | -0.000001349 | 0.000000448  | -0.000000702 |
| 6  | -0.000000717 | 0.000001209  | -0.000001392 |
| 6  | -0.000000604 | 0.000000783  | -0.000001049 |
| 1  | -0.000001355 | 0.000001151  | -0.000000587 |
| 1  | -0.000000796 | 0.000001308  | -0.000001728 |
| 1  | -0.000001092 | 0.00000131   | -0.000001279 |
| 1  | -0.000001158 | 0.000001037  | -0.000001369 |
| 1  | -0.000001094 | 0.000000285  | 0.000000092  |
| 1  | -0.000001151 | 0.000001504  | 0.000000021  |
| 1  | -0.000001242 | 0.000000762  | -0.000000595 |
| 6  | 0.000000152  | -0.000000411 | -0.000000156 |
| 6  | 0.000001238  | -0.000001136 | 0.000000365  |
| 6  | 0.000000023  | 0.000000166  | -0.000000194 |
| 6  | 0.000000005  | 0.000001277  | 0.000001705  |
| 6  | -0.000000582 | -0.000005395 | 0.000000818  |
| 1  | -0.000000041 | -0.000000614 | 0.000000593  |
| 1  | 0.000001272  | 0.000000104  | -0.000000614 |
| 7  | 0.000001335  | 0.000009635  | 0.000009514  |
| 8  | 0.000001633  | -0.000008559 | -0.000005663 |
| 1  | -0.000000381 | -0.000000131 | 0.000000352  |
| 1  | 0.000000053  | -0.00000004  | 0.000000442  |
| 17 | -0.000001035 | 0.000000314  | -0.000000721 |
| 9  | 0.00000175   | -0.00000171  | -0.000001421 |
| 9  | -0.000000052 | -0.000002445 | 0.000001563  |
| 9  | 0.000000286  | -0.000001063 | 0.000003361  |

Zero-point correction=

1.165616 (Hartree/Particle)

Thermal correction to Energy=

1.243041

Thermal correction to Enthalpy=

1.243986

Thermal correction to Gibbs Free Energy=

1.041365

Sum of electronic and zero-point Energies=

-4515.476284

Sum of electronic and thermal Energies=

-4515.398858

Sum of electronic and thermal Enthalpies=

-4515.397914

Sum of electronic and thermal Free Energies=

-4515.600534

C-TS1b

|   |              |              |              |
|---|--------------|--------------|--------------|
| 6 | 0.000000243  | 0.000000892  | -0.0000001   |
| 6 | -0.000001349 | 0.000000019  | 0.000000948  |
| 7 | -0.000000258 | -0.000001083 | 0.000000689  |
| 7 | 0.000001434  | -0.000000487 | -0.000000999 |

|    |              |              |              |
|----|--------------|--------------|--------------|
| 16 | -0.000000056 | -0.000000265 | 0.00000013   |
| 8  | -0.000000036 | -0.000001544 | 0.000000627  |
| 8  | -0.000000724 | -0.000001263 | 0.000000884  |
| 6  | -0.000000718 | -0.000002085 | 0.000000902  |
| 6  | -0.000000206 | -0.000001553 | 0.000000471  |
| 6  | -0.000000113 | -0.000002068 | 0.000001219  |
| 6  | -0.000001211 | -0.000002833 | 0.000001654  |
| 6  | -0.000000099 | -0.000001668 | 0.000001447  |
| 6  | -0.000000087 | -0.000001839 | 0.000001853  |
| 1  | -0.000000147 | -0.000001282 | 0.000000437  |
| 1  | -0.000000195 | -0.000002073 | 0.000000881  |
| 1  | -0.000001324 | -0.000001861 | 0.000002317  |
| 1  | -0.000001046 | -0.000001326 | 0.00000162   |
| 6  | -0.000000956 | -0.00000263  | 0.00000167   |
| 6  | -0.000000668 | -0.000000105 | 0.000001233  |
| 6  | -0.000000636 | 0.00000086   | 0.000001104  |
| 1  | -0.00000086  | -0.000000426 | 0.000001363  |
| 1  | -0.00000088  | 0.000000433  | 0.000000748  |
| 6  | -0.000001089 | 0.000000347  | 0.000001372  |
| 1  | -0.000000773 | 0.000000266  | 0.00000117   |
| 1  | -0.000000539 | 0.000000359  | 0.00000107   |
| 6  | -0.000001246 | 0.000001356  | 0.000001376  |
| 1  | -0.000001207 | 0.000001109  | 0.000001299  |
| 1  | -0.000001376 | 0.00000034   | 0.000001775  |
| 1  | -0.000001386 | 0.000001451  | 0.000001778  |
| 1  | -0.000001104 | 0.000001213  | 0.000001379  |
| 1  | -0.000001036 | 0.000001514  | 0.000001108  |
| 6  | 0.000000621  | -0.00000035  | -0.000000527 |
| 6  | 0.000000946  | -0.000001069 | -0.000000906 |
| 1  | 0.000000939  | -0.000000402 | -0.000000936 |
| 1  | 0.000001026  | -0.000000316 | -0.000000804 |
| 6  | 0.00000091   | -0.000001624 | -0.00000139  |
| 1  | 0.000001021  | -0.00000125  | -0.000001682 |
| 1  | 0.000000475  | -0.000001462 | -0.000000374 |
| 6  | 0.000001224  | -0.00000199  | -0.000001145 |
| 1  | 0.00000089   | -0.000001317 | -0.000001042 |
| 1  | 0.00000106   | -0.000001467 | -0.000001469 |
| 1  | 0.000001279  | -0.000002481 | -0.00000139  |
| 1  | 0.000001263  | -0.000002198 | -0.000001433 |
| 1  | 0.000000921  | -0.000002358 | -0.000000826 |
| 16 | 0.000000584  | 0.000000383  | -0.000002029 |
| 8  | 0.000000614  | 0.000000309  | -0.000000612 |
| 8  | 0.000000818  | 0.000000412  | -0.000000938 |
| 6  | 0.000001097  | 0.000000062  | -0.000001445 |

|    |             |             |             |
|----|-------------|-------------|-------------|
| 6  | 0.00000769  | -0.00000917 | -0.00001205 |
| 6  | 0.00001873  | 0.00000762  | -0.00001684 |
| 6  | 0.00000741  | -0.00000304 | -0.00004935 |
| 1  | 0.00000981  | -0.00001543 | -0.00001188 |
| 6  | 0.00002201  | 0.00000208  | 0.00001333  |
| 1  | 0.00001689  | 0.00000609  | -0.00002203 |
| 6  | 0.0000165   | -0.00000823 | -0.00003658 |
| 1  | 0.00001592  | -0.00001206 | -0.00002057 |
| 1  | 0.00002019  | 0.00000005  | -0.00003008 |
| 6  | 0.00001888  | -0.00001157 | -0.00004347 |
| 1  | 0.0000198   | 0.00000045  | 0.00000549  |
| 1  | 0.00004283  | -0.00003117 | -0.00002788 |
| 1  | 0.00000528  | 0.00000322  | -0.0000449  |
| 79 | -0.00000566 | 0.00000456  | 0.00001212  |
| 6  | -0.00000343 | 0.00000724  | -0.00000941 |
| 6  | -0.00000505 | 0.00001021  | 0.00000088  |
| 6  | -0.00000068 | 0.00001193  | 0.00000042  |
| 1  | 0.00000166  | 0.00000879  | -0.00000289 |
| 1  | -0.00000553 | 0.00001493  | 0.00000715  |
| 7  | -0.00001175 | 0.00001835  | 0.00001901  |
| 7  | 0.00000175  | 0.00000389  | -0.0000068  |
| 6  | 0.00000658  | 0.00000744  | -0.00000236 |
| 6  | -0.00001976 | 0.00000841  | 0.00001958  |
| 6  | -0.00000436 | 0.00001879  | 0.00001143  |
| 6  | -0.00001776 | 0.00001168  | 0.00001761  |
| 6  | -0.00001278 | 0.00001692  | 0.00001616  |
| 6  | -0.00001362 | 0.00001209  | 0.00001568  |
| 1  | -0.00001685 | 0.00000874  | 0.00002242  |
| 1  | -0.00001059 | 0.00002308  | 0.00001255  |
| 1  | -0.00001708 | 0.0000164   | 0.00002081  |
| 6  | 0.00000545  | 0.00000412  | -0.00000421 |
| 6  | 0.00000624  | 0.00000669  | -0.00001318 |
| 6  | 0.00000254  | -0.00000066 | -0.00000031 |
| 6  | 0.00001108  | 0.0000003   | -0.00001356 |
| 6  | 0.00001061  | -0.00000577 | -0.00000878 |
| 6  | 0.00001218  | -0.00000161 | -0.00001358 |
| 1  | 0.00001169  | 0.00000055  | -0.0000018  |
| 1  | 0.00000836  | -0.00000111 | -0.00000694 |
| 1  | 0.00001229  | -0.00000462 | -0.00000174 |
| 6  | 0.00000084  | 0.00000898  | -0.00001078 |
| 6  | 0.00000567  | 0.00001772  | -0.00001343 |
| 6  | 0.00000628  | 0.0000157   | -0.00001212 |
| 1  | 0.00000113  | 0.00001559  | -0.00000862 |
| 1  | 0.00000405  | 0.00001606  | -0.00000704 |

|   |              |              |              |
|---|--------------|--------------|--------------|
| 1 | 0.00000685   | 0.000002324  | -0.000001267 |
| 1 | 0.000000999  | 0.000001467  | -0.000001798 |
| 1 | 0.000000916  | 0.000001069  | -0.000001535 |
| 1 | 0.000000873  | 0.000001436  | -0.000001606 |
| 1 | 0.00000099   | 0.000001752  | -0.000001355 |
| 6 | -0.000000011 | -0.000000836 | 0.000000368  |
| 6 | -0.000000103 | -0.000000998 | -0.000000047 |
| 6 | -0.000000249 | -0.000000387 | -0.000000642 |
| 1 | -0.000000027 | -0.000000244 | 0.000000302  |
| 1 | 0.000000888  | -0.000000267 | -0.000000835 |
| 1 | -0.000000051 | -0.000001564 | 0.000000726  |
| 1 | 0.000000078  | -0.000002154 | -0.000000543 |
| 1 | 0.000000151  | -0.000000448 | -0.000000315 |
| 1 | 0.000000711  | -0.000001059 | -0.000000255 |
| 1 | -0.000000025 | -0.000000895 | 0.000000396  |
| 6 | -0.000000537 | 0.000001708  | 0.000000645  |
| 6 | -0.000000055 | 0.000002588  | -0.000000201 |
| 6 | -0.000000534 | 0.000002656  | 0.000000725  |
| 1 | -0.000000067 | 0.000001707  | -0.000000226 |
| 1 | -0.000000653 | 0.000002205  | -0.000000273 |
| 1 | -0.000000234 | 0.000002256  | -0.000000022 |
| 1 | -0.000000575 | 0.000002412  | 0.000000714  |
| 1 | -0.000000745 | 0.000003024  | 0.000000048  |
| 1 | -0.000001152 | 0.000002798  | 0.000000491  |
| 1 | -0.000000386 | 0.000002934  | 0.000000246  |
| 6 | -0.000000498 | 0.000000691  | 0.000001478  |
| 6 | -0.000001189 | 0.000000384  | 0.000001579  |
| 6 | -0.000000669 | -0.000000482 | 0.000001997  |
| 1 | -0.000001121 | -0.000000148 | 0.000000926  |
| 1 | -0.000001172 | 0.000000465  | 0.000001933  |
| 1 | -0.000001654 | 0.000000502  | 0.00000171   |
| 1 | -0.000001262 | 0.000000288  | 0.000001414  |
| 1 | -0.000001085 | -0.000000065 | 0.000001318  |
| 1 | -0.000001593 | 0.000000272  | 0.000002283  |
| 1 | -0.000001148 | -0.000000959 | 0.000001625  |
| 6 | 0.000000282  | 0.000000121  | 0.000000841  |
| 6 | 0.000000201  | 0.000000035  | 0.00000003   |
| 6 | -0.000000267 | -0.000000096 | -0.000000025 |
| 6 | 0.000000006  | -0.000000804 | 0.000000375  |
| 6 | 0.000000483  | -0.000000271 | -0.000000794 |
| 1 | -0.000000131 | 0.000000143  | 0.000000047  |
| 1 | -0.000000703 | -0.000000322 | -0.000000051 |
| 7 | -0.000000941 | -0.000000028 | -0.000000115 |
| 8 | 0.000001421  | -0.00000178  | -0.000001224 |

|                                              |             |             |                             |
|----------------------------------------------|-------------|-------------|-----------------------------|
| 1                                            | 0.00000302  | -0.00000812 | -0.00000258                 |
| 1                                            | -0.00000247 | 0.00000756  | 0.00000156                  |
| 17                                           | 0.00000575  | -0.00001509 | -0.00000466                 |
| 9                                            | -0.00000742 | -0.00002734 | 0.00001388                  |
| 9                                            | -0.00001251 | -0.00002335 | 0.00002465                  |
| 9                                            | -0.00001056 | -0.00001994 | 0.00001849                  |
| Zero-point correction=                       |             |             | 1.163128 (Hartree/Particle) |
| Thermal correction to Energy=                |             |             | 1.240363                    |
| Thermal correction to Enthalpy=              |             |             | 1.241307                    |
| Thermal correction to Gibbs Free Energy=     |             |             | 1.035852                    |
| Sum of electronic and zero-point Energies=   |             |             | -4515.460431                |
| Sum of electronic and thermal Energies=      |             |             | -4515.383196                |
| Sum of electronic and thermal Enthalpies=    |             |             | -4515.382252                |
| Sum of electronic and thermal Free Energies= |             |             | -4515.587707                |

#### C-1b

|    |              |              |              |
|----|--------------|--------------|--------------|
| 6  | -0.00001547  | 0.00000228   | 0.00000266   |
| 6  | 0.00000379   | -0.00002362  | -0.00000412  |
| 7  | 0.00001356   | -0.000007419 | -0.000006786 |
| 7  | 0.00000294   | 0.000005201  | -0.000003311 |
| 16 | 0.00000185   | 0.000006541  | -0.000001675 |
| 8  | -0.000001522 | -0.000002669 | -0.000001679 |
| 8  | 0.000000855  | 0.000000378  | -0.000003194 |
| 6  | 0.000001471  | -0.000000024 | -0.00000176  |
| 6  | 0.0000009    | -0.000001383 | -0.000002575 |
| 6  | 0.00000095   | -0.00000104  | -0.000002533 |
| 6  | 0.000001812  | 0.000002126  | -0.00000199  |
| 6  | 0.000000721  | 0.000001174  | -0.000001287 |
| 6  | 0.000000827  | 0.000000359  | -0.000001948 |
| 1  | 0.000000005  | -0.000000531 | -0.000002885 |
| 1  | 0.000000636  | -0.000000251 | -0.000002341 |
| 1  | 0.000001996  | 0.000001491  | -0.000000827 |
| 1  | 0.000001598  | 0.000000922  | -0.000001403 |
| 6  | 0.000003767  | 0.000006207  | -0.000000431 |
| 6  | -0.00000036  | 0.000000376  | -0.00000049  |
| 6  | -0.000000859 | -0.000001978 | -0.000001145 |
| 1  | -0.000000617 | -0.000001544 | -0.000002012 |
| 1  | -0.000000184 | -0.000001045 | -0.000001129 |
| 6  | -0.00000175  | -0.000002438 | -0.000001103 |
| 1  | -0.000001295 | -0.000002546 | -0.000001421 |
| 1  | -0.000001077 | -0.000001409 | 0.000000074  |
| 6  | -0.0000027   | -0.000002704 | 0.000000163  |
| 1  | -0.000001753 | -0.000002231 | -0.00000032  |
| 1  | -0.000001373 | -0.00000247  | -0.000000948 |

|    |              |              |              |
|----|--------------|--------------|--------------|
| 1  | -0.000002518 | -0.000003335 | -0.00000034  |
| 1  | -0.000002115 | -0.000003416 | -0.000000937 |
| 1  | -0.000002217 | -0.000003072 | -0.000000176 |
| 6  | 0.000004001  | 0.00000033   | -0.000000493 |
| 6  | 0.0000017    | 0.000001404  | -0.000001212 |
| 1  | 0.000000937  | 0.000001235  | 0.000000657  |
| 1  | 0.000000886  | 0.000000666  | -0.000001282 |
| 6  | 0.000001839  | 0.000001588  | -0.000002337 |
| 1  | 0.00000135   | 0.00000144   | -0.000001994 |
| 1  | 0.00000145   | 0.000001306  | -0.000001697 |
| 6  | 0.000003246  | 0.000002686  | -0.000001532 |
| 1  | 0.000002205  | 0.00000263   | -0.000000954 |
| 1  | 0.000002483  | 0.000002645  | -0.000000746 |
| 1  | 0.000003031  | 0.000003125  | -0.000002366 |
| 1  | 0.000002736  | 0.0000023    | -0.000002543 |
| 1  | 0.000002927  | 0.000002199  | -0.000002961 |
| 16 | -0.000002343 | -0.00000361  | -0.000000404 |
| 8  | 0.000002178  | 0.000001997  | -0.000000138 |
| 8  | 0.000000935  | 0.00000136   | -0.000001456 |
| 6  | 0.000002887  | -0.000000885 | 0.000000054  |
| 6  | -0.000002166 | -0.000001699 | -0.000001826 |
| 6  | -0.000001865 | -0.000001373 | 0.000000505  |
| 6  | -0.000002887 | -0.000002995 | 0.000001519  |
| 1  | -0.000000927 | -0.000000249 | 0.000000118  |
| 6  | -0.000002359 | -0.000001009 | -0.000003183 |
| 1  | -0.000000548 | -0.00000059  | -0.000001576 |
| 6  | 0.000001706  | -0.000001404 | 0.000000327  |
| 1  | -0.000001592 | -0.000002067 | 0.000000568  |
| 1  | -0.000001464 | -0.000002664 | -0.000001514 |
| 6  | -0.000001368 | -0.000003395 | -0.000000414 |
| 1  | -0.000002479 | -0.00000208  | -0.000000573 |
| 1  | -0.00000194  | -0.000004019 | -0.000000404 |
| 1  | -0.000003876 | -0.000002949 | -0.000000173 |
| 79 | -0.000000142 | -0.000002677 | -0.000002649 |
| 6  | -0.000004117 | 0.000000091  | 0.000006084  |
| 6  | 0.000000481  | -0.000003707 | 0.000003093  |
| 6  | -0.000001554 | 0.000003357  | 0.000001682  |
| 1  | 0.000000634  | 0.000002751  | 0.000003045  |
| 1  | -0.000001103 | 0.000000857  | 0.000003177  |
| 7  | -0.000000875 | 0.000005271  | 0.000001393  |
| 7  | 0.000000858  | -0.000001343 | 0.00000051   |
| 6  | -0.00000185  | 0.000003657  | 0.000002981  |
| 6  | 0.000001374  | -0.000003213 | 0.000002702  |
| 6  | -0.000000405 | -0.0000028   | -0.000000118 |

|   |              |              |              |
|---|--------------|--------------|--------------|
| 6 | -0.000001529 | -0.000002297 | -0.000001164 |
| 6 | -0.000001294 | -0.000002587 | 0.000003134  |
| 6 | -0.000003122 | 0.000001317  | 0.000002189  |
| 1 | -0.00000177  | -0.000001535 | 0.000001529  |
| 1 | -0.000002476 | -0.000002263 | 0.000001978  |
| 1 | -0.000002259 | -0.00000267  | 0.000001403  |
| 6 | 0.000003022  | 0.000001754  | 0.000002593  |
| 6 | -0.000002188 | 0.000006266  | -0.000000628 |
| 6 | 0.000001437  | 0.000002517  | 0.000001886  |
| 6 | 0.000001342  | 0.000002261  | 0.000004134  |
| 6 | -0.000000591 | 0.000003324  | -0.000001783 |
| 6 | 0.000003004  | 0.000000088  | 0.000001441  |
| 1 | 0.000000871  | 0.00000243   | 0.0000016    |
| 1 | 0.000002165  | 0.000003565  | 0.000001215  |
| 1 | 0.000001706  | 0.000003677  | 0.000001364  |
| 6 | -0.000000788 | -0.000000579 | 0.000003344  |
| 6 | 0.000001381  | 0.000002752  | 0.000003018  |
| 6 | 0.000001397  | 0.000000677  | 0.000001957  |
| 1 | -0.000000568 | 0.000000607  | 0.000002429  |
| 1 | -0.000000516 | 0.000001045  | 0.000003896  |
| 1 | -0.00000069  | 0.000001145  | 0.000003731  |
| 1 | -0.000000011 | 0.000001897  | 0.000003719  |
| 1 | -0.000000463 | -0.000000315 | 0.000001513  |
| 1 | -0.000000382 | 0.000001273  | 0.000002403  |
| 1 | -0.000000763 | 0.000000366  | 0.000002426  |
| 6 | 0.000004287  | 0.000001341  | -0.000001258 |
| 6 | 0.000001922  | 0.000002666  | 0.000000105  |
| 6 | -0.000000246 | 0.000003584  | 0.00000288   |
| 1 | 0.000001398  | 0.000001279  | 0.000002906  |
| 1 | 0.000003209  | 0.000003885  | -0.000000782 |
| 1 | 0.000001548  | 0.000002799  | -0.000000563 |
| 1 | 0.000002099  | 0.000002351  | -0.000000122 |
| 1 | 0.000001571  | 0.000002612  | 0.000002806  |
| 1 | 0.000003078  | 0.000003076  | 0.000002127  |
| 1 | 0.00000181   | 0.000003116  | 0.000001618  |
| 6 | -0.000001045 | 0.000000298  | 0.000002578  |
| 6 | -0.000003335 | -0.000002347 | 0.000002044  |
| 6 | -0.0000023   | -0.000001378 | 0.000003565  |
| 1 | -0.000000627 | -0.000000066 | 0.000002009  |
| 1 | -0.000001526 | -0.000001525 | 0.00000159   |
| 1 | -0.000002056 | -0.000001164 | 0.000002453  |
| 1 | -0.000001909 | -0.000002213 | 0.000001701  |
| 1 | -0.000001889 | -0.000000674 | 0.000003716  |
| 1 | -0.00000233  | -0.000000892 | 0.000003221  |



|    |              |              |              |
|----|--------------|--------------|--------------|
| 1  | -0.000002369 | -0.000001163 | 0.000003703  |
| 6  | -0.000003028 | -0.00000213  | 0.000000361  |
| 6  | 0.000001637  | 0.000001443  | 0.000002078  |
| 6  | 0.000001257  | 0.000002211  | 0.000000383  |
| 1  | -0.000000584 | 0.000000074  | 0.000001394  |
| 1  | -0.000000635 | 0.000000138  | 0.000002338  |
| 1  | -0.000000251 | 0.000001047  | 0.000001488  |
| 1  | -0.000001131 | 0.000000013  | 0.000002145  |
| 1  | -0.000000039 | -0.000000422 | -0.000000489 |
| 1  | -0.000000047 | -0.000001464 | -0.000000048 |
| 1  | 0.000000671  | -0.000000412 | -0.000000251 |
| 6  | -0.000001603 | 0.000000347  | -0.000000471 |
| 6  | 0.000002185  | 0.000000094  | -0.000003585 |
| 6  | -0.000001466 | -0.000004017 | -0.000006096 |
| 6  | 0.000000325  | -0.000001405 | -0.000001544 |
| 6  | 0.000001525  | 0.000000317  | -0.000007826 |
| 1  | -0.000000765 | -0.00000286  | -0.000004209 |
| 1  | 0.000000341  | -0.000003074 | -0.000002031 |
| 7  | -0.000000047 | -0.000004098 | -0.000003843 |
| 8  | -0.000002844 | -0.000000032 | -0.000000004 |
| 1  | 0.000000069  | -0.000001954 | -0.000004667 |
| 1  | -0.000001513 | -0.000002684 | -0.000002728 |
| 17 | 0.000001262  | -0.000000373 | -0.000002071 |
| 9  | 0.000001936  | -0.00000111  | -0.000000807 |
| 9  | 0.000002069  | 0.000000199  | -0.000002819 |
| 9  | -0.000002298 | -0.000001499 | -0.000001993 |

Zero-point correction=

1.165641 (Hartree/Particle)

Thermal correction to Energy=

1.243245

Thermal correction to Enthalpy=

1.244189

Thermal correction to Gibbs Free Energy=

1.041051

Sum of electronic and zero-point Energies=

-4515.458189

Sum of electronic and thermal Energies=

-4515.380586

Sum of electronic and thermal Enthalpies=

-4515.379641

Sum of electronic and thermal Free Energies=

-4515.582779

C-TS2b

|    |              |              |              |
|----|--------------|--------------|--------------|
| 6  | 0.000000474  | 0.000001912  | 0.000000586  |
| 6  | 0.000000018  | -0.000000781 | -0.000000061 |
| 7  | -0.000000016 | 0.000000387  | -0.000001718 |
| 7  | 0.000000534  | 0.000000698  | 0.000000362  |
| 16 | 0.000000155  | -0.000000872 | -0.000000091 |
| 8  | -0.000000028 | 0.000000144  | -0.000001628 |
| 8  | -0.000000712 | -0.000000367 | -0.000000887 |
| 6  | -0.000000067 | -0.000000326 | -0.000000198 |

|    |              |              |              |
|----|--------------|--------------|--------------|
| 6  | -0.000000598 | -0.000000442 | -0.000002551 |
| 6  | -0.000000045 | -0.000000671 | -0.000002623 |
| 6  | -0.000001066 | -0.000000962 | -0.000003093 |
| 6  | -0.000001215 | -0.000000825 | -0.000002263 |
| 6  | -0.000000495 | -0.000000718 | -0.000001617 |
| 1  | -0.000000106 | -0.000000041 | -0.000002662 |
| 1  | -0.000000463 | -0.000000322 | -0.000003433 |
| 1  | -0.000001297 | -0.000001071 | -0.000001888 |
| 1  | -0.000000795 | -0.000000077 | -0.000001183 |
| 6  | -0.000001239 | -0.000000954 | -0.000003126 |
| 6  | 0.000000203  | 0.000000369  | -0.000001658 |
| 6  | 0.000000083  | 0.000000932  | -0.000001366 |
| 1  | 0.000000243  | 0.000000289  | -0.000001718 |
| 1  | 0.000000446  | 0.000000524  | -0.000001311 |
| 6  | 0.000001172  | 0.000001286  | -0.000001584 |
| 1  | 0.000000855  | 0.000000847  | -0.000000146 |
| 1  | 0.000001138  | 0.000000951  | -0.000000704 |
| 6  | 0.000001681  | 0.000001786  | -0.000001442 |
| 1  | 0.000001279  | 0.000001408  | -0.000001371 |
| 1  | 0.000000116  | 0.000001217  | -0.000002032 |
| 1  | 0.000001948  | 0.000002041  | -0.000000177 |
| 1  | 0.000001667  | 0.000000171  | -0.000001677 |
| 1  | 0.000001843  | 0.000001856  | -0.000001019 |
| 6  | 0.000000029  | 0.000000685  | -0.000000234 |
| 6  | 0.000001202  | 0.000001108  | 0.000000254  |
| 1  | 0.000000743  | 0.000000784  | -0.000000245 |
| 1  | 0.000000696  | 0.000000535  | 0.000000747  |
| 6  | 0.000001501  | 0.000001539  | 0.000000046  |
| 1  | 0.000001131  | 0.000001089  | -0.000000106 |
| 1  | 0.000001027  | 0.000001058  | 0.000000596  |
| 6  | 0.000001895  | 0.000001917  | 0.000000501  |
| 1  | 0.000001405  | 0.000001406  | 0.000000846  |
| 1  | 0.000001572  | 0.000001514  | 0.000000119  |
| 1  | 0.000002229  | 0.000002219  | 0.000000685  |
| 1  | 0.000001938  | 0.000002002  | 0.000000086  |
| 1  | 0.000001852  | 0.000001801  | 0.000000835  |
| 16 | -0.000000809 | 0.000000399  | -0.000000077 |
| 8  | -0.000000337 | -0.000000796 | -0.000000236 |
| 8  | -0.000000354 | -0.000000257 | 0.000000265  |
| 6  | 0            | 0.000000206  | -0.000000809 |
| 6  | 0.000000217  | -0.000000087 | -0.000001424 |
| 6  | -0.000000525 | 0.000000236  | -0.000001169 |
| 6  | -0.000000747 | 0.000000285  | -0.000002073 |
| 1  | -0.000000313 | -0.000000553 | -0.000001175 |

|    |              |              |              |
|----|--------------|--------------|--------------|
| 6  | 0.000000868  | 0.000000384  | -0.000001321 |
| 1  | 0.000000212  | -0.00000002  | -0.000000286 |
| 6  | 0.000000232  | -0.00000026  | -0.000001277 |
| 1  | -0.000000276 | -0.000000237 | -0.000000245 |
| 1  | 0.000000486  | 0.000000342  | -0.000001216 |
| 6  | 0.000000021  | 0.000001139  | -0.000002583 |
| 1  | 0.000000104  | -0.000000051 | -0.000002591 |
| 1  | 0.000000399  | -0.000000107 | -0.000000288 |
| 1  | 0.000000127  | 0.000000567  | -0.000002992 |
| 79 | -0.000000075 | -0.000001072 | 0.000000209  |
| 6  | 0.00000047   | 0.000000557  | 0.000001398  |
| 6  | 0.000000076  | -0.000000015 | 0.00000101   |
| 6  | -0.000000691 | -0.000000764 | 0.000001685  |
| 1  | -0.000000792 | -0.00000078  | 0.000001679  |
| 1  | 0.000000052  | -0.000000138 | 0.000001198  |
| 7  | -0.00000016  | 0.000000465  | 0.000000654  |
| 7  | -0.000000902 | -0.00000082  | 0.000001232  |
| 6  | 0.000000455  | -0.00000053  | 0.000000682  |
| 6  | 0.000000662  | 0.000001407  | 0.00000105   |
| 6  | 0.000000405  | 0.00000035   | -0.000000554 |
| 6  | 0.000000784  | 0.000001233  | 0.000000104  |
| 6  | 0.000000763  | 0.000001053  | -0.000000085 |
| 6  | 0.000001121  | 0.000000585  | 0.000000067  |
| 1  | 0.000001754  | 0.000001539  | 0.000000433  |
| 1  | 0.000000869  | 0.000000991  | -0.000000859 |
| 1  | 0.000001496  | 0.000001591  | -0.000000504 |
| 6  | -0.000001392 | -0.000000861 | 0.000001375  |
| 6  | -0.000001351 | -0.000001474 | 0.000000659  |
| 6  | -0.000000586 | -0.000001537 | 0.000002056  |
| 6  | -0.000001625 | -0.000001836 | 0.000001034  |
| 6  | -0.000001031 | -0.000001277 | 0.000002174  |
| 6  | -0.000001569 | -0.000001591 | 0.000001708  |
| 1  | -0.000001813 | -0.000001978 | 0.000000956  |
| 1  | -0.000000882 | -0.000001119 | 0.000002388  |
| 1  | -0.000001828 | -0.000001855 | 0.000001909  |
| 6  | -0.000001112 | -0.000001364 | 0.00000048   |
| 6  | -0.000001587 | -0.000001606 | 0.000000488  |
| 6  | -0.000001611 | -0.000001396 | -0.000000231 |
| 1  | -0.000001115 | -0.000001161 | 0.000000408  |
| 1  | -0.000001592 | -0.000001641 | 0.000000961  |
| 1  | -0.000001725 | -0.000001711 | 0.000000123  |
| 1  | -0.000002001 | -0.000002058 | 0.00000068   |
| 1  | -0.000001136 | -0.00000133  | 0.000000013  |
| 1  | -0.000001758 | -0.000001947 | 0.00000004   |

|    |              |              |              |
|----|--------------|--------------|--------------|
| 1  | -0.000001649 | -0.000001526 | -0.000000689 |
| 6  | -0.000000714 | -0.000000643 | 0.000001688  |
| 6  | -0.000000398 | -0.000000399 | 0.000002353  |
| 6  | -0.000000549 | -0.000000165 | 0.000003278  |
| 1  | 0.000000035  | 0.000000062  | 0.000002467  |
| 1  | 0.000000406  | 0.000000138  | 0.000002048  |
| 1  | 0.000000082  | 0.000000018  | 0.000002553  |
| 1  | -0.000000065 | -0.000000578 | 0.000002687  |
| 1  | -0.000000738 | -0.000000857 | 0.00000307   |
| 1  | -0.000000943 | -0.000000858 | 0.000003604  |
| 1  | -0.000000183 | -0.000000363 | 0.000003345  |
| 6  | -0.000000233 | -0.000000112 | -0.000000288 |
| 6  | -0.00000007  | -0.000000004 | -0.000001191 |
| 6  | -0.000000004 | -0.000000138 | -0.000000464 |
| 1  | -0.000000314 | -0.000000046 | -0.000000248 |
| 1  | 0.000000087  | -0.000000312 | -0.000001369 |
| 1  | -0.000000406 | -0.000000349 | -0.000001242 |
| 1  | 0.000000154  | 0.000000075  | -0.000001308 |
| 1  | -0.00000004  | -0.000000078 | 0.000000119  |
| 1  | -0.000000031 | 0.000000214  | -0.00000042  |
| 1  | -0.000000366 | -0.000000359 | -0.000000407 |
| 6  | 0.000001223  | 0.000000719  | 0.00000121   |
| 6  | 0.000001195  | 0.000001215  | 0.000002006  |
| 6  | 0.000001168  | 0.000001215  | 0.000001274  |
| 1  | -0.000000082 | 0.000000569  | 0.000001724  |
| 1  | 0.000001021  | 0.000000946  | 0.000002014  |
| 1  | 0.000001042  | 0.000001053  | 0.000002212  |
| 1  | 0.000001468  | 0.00000126   | 0.000001573  |
| 1  | 0.000000628  | 0.000000381  | 0.000000992  |
| 1  | 0.000001243  | 0.000001255  | 0.000000992  |
| 1  | 0.00000108   | 0.00000098   | 0.000001753  |
| 6  | -0.000000833 | -0.000000435 | 0.000000971  |
| 6  | -0.000000727 | -0.000001435 | 0.00000133   |
| 6  | -0.000000836 | -0.00000082  | 0.000002008  |
| 6  | -0.00000037  | -0.000000155 | 0.000002072  |
| 6  | -0.000000013 | -0.000000068 | 0.000001407  |
| 1  | -0.000001015 | -0.000001021 | 0.000002094  |
| 1  | -0.000000625 | -0.000000414 | 0.000000652  |
| 7  | -0.000000861 | -0.000001063 | 0.000001136  |
| 8  | 0.000001591  | 0.000000668  | 0.000000552  |
| 1  | -0.000000194 | -0.000000164 | 0.000002309  |
| 1  | -0.000001188 | -0.000001249 | 0.000001222  |
| 17 | 0.000000474  | 0.000000474  | 0.000001898  |
| 9  | -0.000001426 | -0.000001581 | -0.000002919 |

|                                              |              |              |                             |
|----------------------------------------------|--------------|--------------|-----------------------------|
| 9                                            | -0.000001177 | -0.000001097 | -0.000004016                |
| 9                                            | -0.000000613 | -0.000000533 | -0.000003133                |
| Zero-point correction=                       |              |              | 1.163146 (Hartree/Particle) |
| Thermal correction to Energy=                |              |              | 1.241148                    |
| Thermal correction to Enthalpy=              |              |              | 1.242092                    |
| Thermal correction to Gibbs Free Energy=     |              |              | 1.036363                    |
| Sum of electronic and zero-point Energies=   |              |              | -4515.457701                |
| Sum of electronic and thermal Energies=      |              |              | -4515.379698                |
| Sum of electronic and thermal Enthalpies=    |              |              | -4515.378754                |
| Sum of electronic and thermal Free Energies= |              |              | -4515.584484                |

C-2b

|    |              |              |              |
|----|--------------|--------------|--------------|
| 6  | 0.000002433  | 0.000006909  | 0.000005221  |
| 6  | -0.000002349 | -0.000002116 | -0.000000278 |
| 7  | -0.000006548 | -0.000005977 | -0.000002408 |
| 7  | 0.000013649  | -0.000004717 | 0.000001362  |
| 16 | -0.000000451 | 0.000010328  | 0.000001852  |
| 8  | -0.00000092  | -0.000003915 | 0.000001363  |
| 8  | -0.000002615 | -0.000001011 | -0.00000082  |
| 6  | -0.000001066 | 0.000000542  | -0.000001043 |
| 6  | 0.000000678  | 0.000001684  | 0.000001399  |
| 6  | -0.000002892 | 0.000000966  | 0.000001029  |
| 6  | -0.000001292 | 0.000001284  | 0.000001487  |
| 6  | 0.000000134  | 0.00000257   | 0.000000914  |
| 6  | -0.000003086 | 0.000001631  | 0.000000481  |
| 1  | -0.00000087  | -0.000000013 | 0.00000003   |
| 1  | -0.000000844 | 0.000001366  | 0.000000858  |
| 1  | -0.000001415 | 0.000001403  | 0.000001239  |
| 1  | -0.000000109 | 0.000000955  | 0.000000102  |
| 6  | -0.000001413 | 0.000001076  | 0.000002103  |
| 6  | 0.000001303  | 0.000000457  | 0.000000317  |
| 6  | -0.000001013 | -0.000000771 | 0.000003166  |
| 1  | -0.000000021 | 0.000000668  | 0.000001088  |
| 1  | 0.000000294  | 0.000000506  | 0.000000719  |
| 6  | 0.000001539  | 0.000001743  | -0.000002352 |
| 1  | 0.000000175  | -0.000000928 | -0.000000161 |
| 1  | 0.000000528  | 0.000000785  | -0.000000151 |
| 6  | 0.000000532  | -0.000000839 | 0.000000939  |
| 1  | 0.000000803  | -0.000000026 | 0.000000858  |
| 1  | -0.00000004  | -0.000000217 | 0.000000469  |
| 1  | 0.000001081  | 0.000000257  | 0.000000166  |
| 1  | 0.000000264  | -0.000000229 | -0.000000421 |
| 1  | 0.000001214  | -0.000000512 | -0.000000004 |
| 6  | 0.000000759  | 0.000000178  | 0.000003595  |

|    |              |              |              |
|----|--------------|--------------|--------------|
| 6  | 0.000000096  | 0.000000224  | -0.000001291 |
| 1  | 0.000002328  | 0.000000072  | 0.000001186  |
| 1  | 0.000001938  | 0.000000737  | -0.000000297 |
| 6  | 0.000002024  | 0.000000617  | 0.000001157  |
| 1  | 0.000000941  | -0.000000764 | 0.000001205  |
| 1  | 0.000001745  | -0.000000004 | 0.000000181  |
| 6  | 0.000002131  | -0.000000016 | 0.000000897  |
| 1  | 0.000001538  | -0.000000099 | 0.000000724  |
| 1  | 0.000001688  | 0.000000098  | 0.00000114   |
| 1  | 0.00000235   | -0.000000284 | 0.000000578  |
| 1  | 0.000001806  | -0.000000055 | 0.000000454  |
| 1  | 0.000001635  | -0.000000396 | 0.00000049   |
| 16 | -0.000005379 | 0.000000794  | -0.000003139 |
| 8  | 0.000000574  | -0.000002495 | 0.000000251  |
| 8  | 0.000000653  | -0.000000924 | 0.00000198   |
| 6  | 0.000003899  | 0.000000889  | 0.000000156  |
| 6  | -0.000001818 | 0.000000274  | -0.000001527 |
| 6  | -0.000000276 | 0.000000242  | 0.000000281  |
| 6  | 0.000000773  | 0.000001399  | 0.000001325  |
| 1  | 0.000000655  | 0.000001313  | 0.000001868  |
| 6  | 0.000000752  | 0.000001275  | 0.000002296  |
| 1  | 0.000000598  | 0.000000875  | 0.000001231  |
| 6  | 0.000000024  | 0.000002417  | 0.000002032  |
| 1  | -0.000000344 | 0.000001058  | 0.00000167   |
| 1  | 0.000001007  | 0.000001728  | 0.000002237  |
| 6  | 0.000000942  | 0.000002098  | 0.000002112  |
| 1  | 0.000000598  | 0.000002187  | 0.000002329  |
| 1  | 0.000000027  | 0.000002034  | 0.000002267  |
| 1  | 0.000001114  | 0.000001899  | 0.000002076  |
| 79 | 0.000002382  | 0.000003232  | 0.000000348  |
| 6  | -0.000003932 | 0.000001705  | -0.000009229 |
| 6  | -0.000003789 | -0.00000106  | -0.000000473 |
| 6  | -0.000001159 | -0.000001252 | -0.000000889 |
| 1  | -0.000000366 | 0.000000195  | -0.000001001 |
| 1  | -0.000000194 | -0.000002317 | -0.000002536 |
| 7  | 0.000003648  | -0.000001916 | 0.000005363  |
| 7  | 0.000005773  | -0.000002237 | 0.00000037   |
| 6  | 0.000001617  | 0.000002591  | -0.000002717 |
| 6  | 0.000000087  | -0.000001096 | -0.00000202  |
| 6  | -0.000000319 | -0.00000247  | 0.000001034  |
| 6  | -0.000000249 | -0.000002705 | 0.000000231  |
| 6  | -0.000000892 | -0.00000294  | -0.000002967 |
| 6  | 0.000000728  | 0.000001026  | -0.000000039 |
| 1  | 0.000001259  | -0.00000135  | -0.000001267 |

|   |              |              |              |
|---|--------------|--------------|--------------|
| 1 | -0.000000745 | -0.000000732 | -0.000001757 |
| 1 | 0.000001034  | -0.00000108  | -0.000000658 |
| 6 | -0.000002405 | -0.000000265 | -0.000001885 |
| 6 | 0.000001211  | -0.000000561 | 0.000000443  |
| 6 | -0.000001354 | 0.000000724  | -0.000000033 |
| 6 | -0.00000135  | 0.000000821  | -0.000001622 |
| 6 | -0.000000717 | -0.000000103 | 0.000000057  |
| 6 | -0.000001456 | -0.000001438 | -0.000001071 |
| 1 | -0.000001835 | -0.000000319 | -0.000000081 |
| 1 | 0.000000983  | -0.000000923 | -0.000000605 |
| 1 | -0.000000616 | 0.000000544  | -0.000000194 |
| 6 | -0.00000361  | -0.000000511 | -0.000000796 |
| 6 | -0.000000409 | -0.000000891 | -0.000001875 |
| 6 | 0.000000372  | -0.000000317 | -0.000000185 |
| 1 | -0.000002215 | -0.000000626 | -0.000000545 |
| 1 | -0.000001718 | -0.000000647 | -0.000001487 |
| 1 | -0.000001809 | -0.000000469 | -0.000001368 |
| 1 | -0.000002205 | -0.000000275 | -0.000000917 |
| 1 | -0.000001385 | 0.000000805  | -0.000000965 |
| 1 | -0.000002881 | 0.000000249  | -0.000001019 |
| 1 | -0.000001755 | -0.000000332 | -0.000000859 |
| 6 | 0.000000697  | -0.000003214 | -0.000001344 |
| 6 | -0.000000118 | -0.000001323 | -0.000000617 |
| 6 | 0.000000857  | 0.000000385  | -0.000000603 |
| 1 | -0.000000047 | -0.000001295 | -0.000001083 |
| 1 | 0.000001321  | -0.000000188 | -0.000000634 |
| 1 | 0.000000463  | -0.000000746 | -0.000000729 |
| 1 | -0.000000023 | -0.000000406 | -0.000000343 |
| 1 | 0.000000026  | -0.000001518 | -0.000000938 |
| 1 | -0.000000593 | -0.00000142  | -0.000001549 |
| 1 | 0.000000535  | -0.000001816 | -0.000001216 |
| 6 | -0.000003696 | 0.000000812  | -0.0000011   |
| 6 | -0.000000366 | -0.000001146 | -0.000002902 |
| 6 | 0.000001488  | -0.000002669 | -0.000001614 |
| 1 | -0.00000101  | -0.000000594 | -0.000001212 |
| 1 | -0.000000698 | 0.000000635  | 0.000000069  |
| 1 | -0.000001129 | -0.000000258 | 0.000000022  |
| 1 | -0.000000913 | -0.000000945 | 0.000000244  |
| 1 | -0.000000821 | -0.000001468 | -0.000001929 |
| 1 | -0.000001466 | -0.000000898 | -0.000001353 |
| 1 | -0.000001696 | -0.000000659 | -0.000001531 |
| 6 | 0.000000762  | -0.000002915 | -0.000000965 |
| 6 | 0.000000738  | -0.000001151 | -0.000001508 |
| 6 | 0.00000048   | -0.000000354 | -0.000001133 |

|    |              |              |               |
|----|--------------|--------------|---------------|
| 1  | 0.000000274  | -0.000001413 | -0.000000813  |
| 1  | 0.000000933  | -0.000001502 | -0.000001193  |
| 1  | 0.00000097   | -0.000001475 | -0.000001153  |
| 1  | 0.000001229  | -0.000001714 | -0.000000505  |
| 1  | 0.000000722  | -0.000000622 | 0.000000015   |
| 1  | 0.00000151   | -0.000000754 | -0.000000456  |
| 1  | 0.000001203  | -0.000001581 | -0.000000483  |
| 6  | -0.000002346 | -0.000001688 | -0.0000007088 |
| 6  | -0.00000048  | -0.00000214  | 0.000004843   |
| 6  | 0.000001037  | 0.000003913  | 0.000002059   |
| 6  | 0.000000543  | 0.000000023  | -0.000003294  |
| 6  | -0.000002284 | -0.000004307 | 0.000003992   |
| 1  | -0.000000667 | 0.000000066  | 0.000000239   |
| 1  | -0.000000961 | -0.000000056 | 0.000000493   |
| 7  | 0.000003555  | 0.000006961  | -0.000002164  |
| 8  | -0.000002327 | -0.000002756 | 0.000005728   |
| 1  | 0.000001315  | -0.000000165 | 0.000000732   |
| 1  | 0.000000039  | 0.000000798  | -0.000000759  |
| 17 | 0.000000565  | -0.000000056 | 0.000000511   |
| 9  | -0.000000817 | 0.000002666  | 0.000000063   |
| 9  | -0.000000686 | 0.000001985  | 0.000001637   |
| 9  | -0.000000303 | 0.000002704  | 0.000002345   |

Zero-point correction=

1.165550 (Hartree/Particle)

Thermal correction to Energy=

1.243015

Thermal correction to Enthalpy=

1.243959

Thermal correction to Gibbs Free Energy=

1.040926

Sum of electronic and zero-point Energies=

-4515.476360

Sum of electronic and thermal Energies=

-4515.398895

Sum of electronic and thermal Enthalpies=

-4515.397950

Sum of electronic and thermal Free Energies=

-4515.600984

C-TS2a

|    |              |              |              |
|----|--------------|--------------|--------------|
| 6  | -0.000001362 | -0.00000006  | -0.000000535 |
| 6  | 0.000001456  | -0.000000299 | 0.000000049  |
| 7  | 0.000000762  | 0.000000176  | -0.000001943 |
| 7  | -0.000001679 | -0.000000942 | 0.000000415  |
| 16 | 0.000000974  | -0.000000986 | -0.000000819 |
| 8  | 0.000001239  | -0.00000159  | 0.000000021  |
| 8  | 0.000001341  | -0.000001398 | -0.000000932 |
| 6  | 0.00000143   | -0.000000969 | -0.000001273 |
| 6  | 0.000000907  | -0.000000366 | -0.000000962 |
| 6  | 0.000000882  | -0.000000517 | -0.000001775 |
| 6  | 0.000001934  | -0.000000678 | -0.000002762 |
| 6  | 0.000001136  | -0.000000867 | -0.000002133 |



|    |              |              |              |
|----|--------------|--------------|--------------|
| 6  | 0.00000141   | -0.000001123 | -0.000001763 |
| 1  | 0.000000614  | -0.000000283 | -0.000000999 |
| 1  | 0.000000891  | -0.000000001 | -0.000001766 |
| 1  | 0.000002213  | -0.000001328 | -0.000002607 |
| 1  | 0.000001863  | -0.000001402 | -0.000001949 |
| 6  | 0.000001279  | -0.000000603 | -0.000002687 |
| 1  | 0.00000156   | -0.000000968 | -0.000003149 |
| 1  | 0.000001541  | -0.000000914 | -0.000001992 |
| 1  | 0.000000877  | 0.000000182  | -0.00000256  |
| 6  | 0.000001542  | -0.000000325 | -0.000001587 |
| 6  | 0.00000058   | 0.000000436  | -0.000002135 |
| 1  | 0.000001198  | -0.000000521 | -0.000002116 |
| 1  | 0.000000202  | 0.000000243  | -0.000001766 |
| 6  | 0.000000714  | 0.000000465  | -0.000002639 |
| 1  | 0.000000322  | 0.000000188  | -0.00000169  |
| 1  | 0.00000013   | 0.000000071  | -0.00000172  |
| 6  | 0.000000346  | 0.000001074  | -0.000003055 |
| 1  | 0.000000571  | 0.000000443  | -0.000002686 |
| 1  | 0.000000999  | 0.000000117  | -0.000002997 |
| 1  | 0.000000384  | 0.000001112  | -0.000003498 |
| 1  | 0.00000032   | 0.000001137  | -0.000002957 |
| 1  | 0.000000037  | 0.00000128   | -0.000002728 |
| 6  | -0.00000018  | -0.000000025 | 0.000000028  |
| 6  | 0.000000022  | -0.00000041  | 0.000000722  |
| 1  | -0.00000032  | 0.000000785  | 0.000000596  |
| 1  | -0.000000234 | 0.000000028  | 0.000000252  |
| 6  | 0.000000085  | -0.000000719 | 0.000001161  |
| 1  | 0.000000197  | -0.000000709 | 0.000000749  |
| 1  | 0.000000229  | -0.000000435 | 0.000000071  |
| 6  | 0.000000328  | -0.000001147 | 0.000001434  |
| 1  | -0.000000141 | -0.00000038  | 0.000000988  |
| 1  | -0.000000319 | -0.00000023  | 0.000001497  |
| 1  | 0.000000189  | -0.000001224 | 0.000001812  |
| 1  | 0.000000374  | -0.000001371 | 0.000001562  |
| 1  | 0.00000066   | -0.000001329 | 0.000001079  |
| 16 | -0.000000216 | 0.000000463  | -0.000000882 |
| 8  | -0.000001209 | 0.000001537  | -0.000000007 |
| 8  | -0.000000308 | 0.000001462  | -0.000000915 |
| 6  | -0.00000083  | 0.000000994  | -0.000001069 |
| 6  | -0.000000632 | 0.000001341  | -0.000001461 |
| 6  | -0.000001129 | 0.000001659  | -0.000000075 |
| 6  | -0.000000808 | 0.000001497  | -0.000001592 |
| 1  | -0.000000142 | 0.000001401  | -0.000001713 |
| 6  | -0.000000906 | 0.000001911  | -0.000000701 |

|    |              |              |              |
|----|--------------|--------------|--------------|
| 1  | -0.000001365 | 0.000001735  | 0.000000021  |
| 6  | -0.000001001 | 0.000001612  | -0.000001503 |
| 1  | -0.000000514 | 0.000001769  | -0.000002263 |
| 1  | -0.000001329 | 0.00000202   | -0.000000456 |
| 6  | -0.000000859 | 0.000001694  | -0.000001711 |
| 9  | -0.000000585 | 0.000001908  | -0.00000153  |
| 9  | -0.000001386 | 0.000002701  | -0.000001369 |
| 9  | -0.000000978 | 0.000002428  | -0.000002107 |
| 79 | -0.000000085 | -0.000000168 | 0.000000132  |
| 6  | -0.00000005  | -0.000000386 | 0.000001126  |
| 6  | -0.000000748 | -0.000000084 | 0.000001984  |
| 6  | -0.000000623 | 0.00000007   | 0.000001485  |
| 1  | -0.000000873 | 0.000000263  | 0.000001631  |
| 1  | -0.000000755 | -0.000000205 | 0.000002514  |
| 7  | -0.000000695 | -0.000000033 | 0.000001456  |
| 7  | 0.000000141  | 0.000000166  | 0.000000684  |
| 6  | -0.000000517 | -0.000000452 | 0.000001949  |
| 6  | -0.000000066 | -0.000001098 | 0.000002226  |
| 6  | -0.000000621 | 0.000000019  | 0.000002257  |
| 6  | 0.000000248  | -0.000001308 | 0.000002362  |
| 6  | -0.000000681 | -0.000000311 | 0.000002511  |
| 6  | -0.000000236 | -0.000000899 | 0.00000259   |
| 1  | 0.000000035  | -0.000001682 | 0.000002391  |
| 1  | -0.000000947 | -0.000000096 | 0.000002718  |
| 1  | -0.000000224 | -0.000001064 | 0.000002824  |
| 6  | -0.00000002  | 0.00000012   | 0.000000907  |
| 6  | -0.000000883 | 0.000000985  | -0.000000107 |
| 6  | 0.000000282  | 0.000000122  | 0.000000186  |
| 6  | -0.000000545 | 0.00000102   | -0.000000319 |
| 6  | -0.000000312 | 0.000000329  | -0.000000438 |
| 6  | -0.000000298 | 0.000000614  | -0.000000747 |
| 1  | -0.000000814 | 0.000001364  | -0.000000781 |
| 1  | 0.000000239  | -0.000000215 | -0.000000433 |
| 1  | -0.00000002  | 0.000000787  | -0.000001047 |
| 6  | -0.000001091 | 0.000001341  | 0.000000344  |
| 6  | -0.000001458 | 0.000001582  | 0.000000722  |
| 6  | -0.000000971 | 0.000001447  | -0.000000232 |
| 1  | -0.000001114 | 0.000000802  | 0.000000532  |
| 1  | -0.000001318 | 0.000001274  | 0.00000109   |
| 1  | -0.000001715 | 0.000001824  | 0.000000798  |
| 1  | -0.000001523 | 0.000001811  | 0.000000445  |
| 1  | -0.000000919 | 0.000001442  | -0.000000053 |
| 1  | -0.000001348 | 0.000001841  | -0.000000491 |
| 1  | -0.000001401 | 0.0000019    | -0.000000088 |

|    |             |             |             |
|----|-------------|-------------|-------------|
| 6  | 0.00000307  | -0.00000764 | 0.00000773  |
| 6  | 0.00000879  | -0.00000917 | 0.00000371  |
| 6  | 0.00000172  | -0.00000844 | 0.00000988  |
| 1  | -0.00000115 | -0.00000805 | 0.00000961  |
| 1  | 0.00000041  | -0.00000079 | 0.0000001   |
| 1  | 0.00000896  | -0.00001484 | 0.00000543  |
| 1  | 0.00000858  | -0.00000963 | -0.00000203 |
| 1  | -0.00000119 | -0.00000267 | 0.00001248  |
| 1  | 0.00000218  | -0.00000626 | 0.00000564  |
| 1  | 0.00000362  | -0.00001125 | 0.00001292  |
| 6  | -0.00001007 | 0.00000426  | 0.00002162  |
| 6  | -0.00001516 | 0.00000841  | 0.00001834  |
| 6  | -0.00001413 | 0.00000631  | 0.00002913  |
| 1  | -0.00001184 | 0.00000638  | 0.00001758  |
| 1  | -0.00000091 | 0.00000709  | 0.00001651  |
| 1  | -0.00001613 | 0.00001115  | 0.00001853  |
| 1  | -0.00001405 | 0.00000814  | 0.00002036  |
| 1  | -0.00001423 | 0.00000277  | 0.00003039  |
| 1  | -0.00001532 | 0.00000554  | 0.00003215  |
| 1  | -0.00001798 | 0.00001054  | 0.00002796  |
| 6  | 0.00000337  | -0.0000134  | 0.00001624  |
| 6  | 0.00000401  | -0.00001762 | 0.00002312  |
| 6  | 0.00000772  | -0.00001809 | 0.00001458  |
| 1  | 0.00000039  | -0.00001338 | 0.00001503  |
| 1  | 0.00000148  | -0.00001473 | 0.00002651  |
| 1  | 0.00000696  | -0.00001989 | 0.00002178  |
| 1  | 0.00000557  | -0.00002017 | 0.00002705  |
| 1  | 0.00000834  | -0.00001458 | 0.00000907  |
| 1  | 0.00000988  | -0.00002043 | 0.00001678  |
| 1  | 0.00001042  | -0.00002003 | 0.00001223  |
| 6  | 0.00000351  | 0.00000044  | -0.00000871 |
| 6  | 0.00000382  | -0.00000154 | -0.00001057 |
| 6  | 0.00000816  | -0.00000783 | -0.0000063  |
| 6  | 0.00001102  | -0.00001235 | -0.00000768 |
| 6  | 0.00000923  | -0.00000741 | -0.0000114  |
| 1  | 0.00000979  | -0.00000913 | -0.00000624 |
| 1  | 0.0000015   | 0.00000371  | -0.00000809 |
| 7  | 0.00000911  | -0.00000483 | -0.00001087 |
| 8  | 0.00001995  | 0.00000038  | -0.00000927 |
| 1  | 0.0000143   | -0.00001549 | -0.00000699 |
| 1  | 0.00000299  | 0.00000068  | -0.00000868 |
| 17 | 0.00001543  | -0.00001362 | -0.0000086  |

Zero-point correction=

1.163684 (Hartree/Particle)

Thermal correction to Energy=

1.241353

|                                              |              |
|----------------------------------------------|--------------|
| Thermal correction to Enthalpy=              | 1.242297     |
| Thermal correction to Gibbs Free Energy=     | 1.038161     |
| Sum of electronic and zero-point Energies=   | -4515.451107 |
| Sum of electronic and thermal Energies=      | -4515.373438 |
| Sum of electronic and thermal Enthalpies=    | -4515.372494 |
| Sum of electronic and thermal Free Energies= | -4515.576630 |

C-2a

|    |              |              |              |
|----|--------------|--------------|--------------|
| 6  | -0.000001421 | -0.00000142  | 0.000002326  |
| 6  | 0.000006784  | 0.000003818  | -0.000001496 |
| 7  | -0.000004641 | 0.000003009  | -0.000004199 |
| 7  | 0.000001375  | 0.00000411   | 0.000004936  |
| 16 | 0.0000034    | -0.000002803 | 0.000007319  |
| 8  | -0.000001308 | 0.000002587  | 0.000001378  |
| 8  | -0.000001906 | 0.000003351  | -0.000001532 |
| 6  | -0.000002738 | 0.000002384  | -0.00000275  |
| 6  | -0.000000397 | -0.000002069 | 0.000000609  |
| 6  | -0.000001103 | -0.000001494 | 0.000002093  |
| 6  | -0.00000064  | 0.000000815  | 0.000000911  |
| 6  | -0.000000061 | 0.000000644  | 0.000003467  |
| 6  | -0.000000448 | 0.00000083   | 0.000003497  |
| 1  | 0.000000236  | -0.000000134 | 0.000000777  |
| 1  | -0.00000015  | -0.000001201 | 0.000001406  |
| 1  | -0.000000831 | 0.000000383  | 0.000002575  |
| 1  | -0.000001129 | 0.000000307  | 0.000001364  |
| 6  | -0.000000936 | -0.000000523 | 0.000002293  |
| 1  | -0.000001458 | -0.000000806 | 0.000002446  |
| 1  | -0.000001109 | -0.000001087 | 0.000003654  |
| 1  | -0.000000147 | -0.000000598 | 0.00000264   |
| 6  | 0.000001144  | -0.000002343 | 0.000002577  |
| 6  | -0.000001327 | 0.000001658  | 0.000000515  |
| 1  | 0.000000344  | 0.000000711  | 0.00000227   |
| 1  | -0.000001831 | 0.000000971  | 0.000001636  |
| 6  | -0.000000955 | -0.000000008 | 0.000001773  |
| 1  | -0.00000066  | -0.000000668 | 0.000001209  |
| 1  | -0.00000022  | 0.000000219  | 0.000000938  |
| 6  | -0.000000317 | -0.000000931 | 0.000001993  |
| 1  | -0.000000227 | 0.000000615  | 0.000001978  |
| 1  | -0.000001061 | -0.000000265 | 0.000001901  |
| 1  | -0.000000465 | -0.00000055  | 0.000001922  |
| 1  | -0.000000587 | -0.00000083  | 0.000001828  |
| 1  | -0.000000348 | -0.000000199 | 0.000001282  |
| 6  | 0.000000884  | -0.000001663 | -0.000002474 |
| 6  | -0.00000043  | 0.000004791  | 0.000000951  |

|    |              |              |              |
|----|--------------|--------------|--------------|
| 1  | 0.000001051  | 0.000000784  | -0.000001133 |
| 1  | 0.000001391  | 0.000000859  | -0.000001004 |
| 6  | 0.000000073  | 0.000000318  | -0.000000084 |
| 1  | 0.000000712  | 0.000000683  | 0.000000095  |
| 1  | -0.000000216 | -0.00000182  | -0.000002757 |
| 6  | -0.00000078  | 0.000001298  | -0.00000192  |
| 1  | -0.000000395 | 0.000000739  | -0.000001226 |
| 1  | 0.000001297  | 0.000001199  | -0.000001359 |
| 1  | 0.000000389  | 0.000001781  | -0.000001725 |
| 1  | 0.000000733  | 0.000001826  | -0.000001815 |
| 1  | -0.000000196 | 0.000002649  | -0.000001455 |
| 16 | -0.000002412 | 0.00000017   | -0.000007119 |
| 8  | 0.000000606  | -0.000003535 | 0.000000488  |
| 8  | 0.000000357  | -0.00000047  | -0.000000538 |
| 6  | -0.000001854 | -0.000002291 | -0.000001296 |
| 6  | 0.000001432  | 0.000001828  | -0.00000014  |
| 6  | -0.000001125 | 0.00000007   | -0.000001092 |
| 6  | -0.000001243 | -0.000000188 | -0.000001344 |
| 1  | -0.000000044 | -0.000000025 | 0.000001336  |
| 6  | 0.000001845  | 0.000001389  | -0.00000105  |
| 1  | -0.000000004 | -0.000000281 | 0.000000015  |
| 6  | 0.000000749  | -0.000000239 | -0.000000158 |
| 1  | 0            | 0.000000299  | 0.000000876  |
| 1  | 0.000000128  | 0.000000742  | -0.000000834 |
| 6  | 0.000001229  | 0.000000332  | -0.00000176  |
| 9  | -0.000000691 | 0.00000166   | 0.000000326  |
| 9  | -0.000000294 | 0.000001186  | -0.000000096 |
| 9  | -0.000000238 | 0.000000115  | -0.000000144 |
| 79 | 0.000001341  | 0.000002688  | 0.000002702  |
| 6  | 0.000001689  | -0.000009397 | -0.000010446 |
| 6  | -0.000001823 | -0.000000546 | 0.000000813  |
| 6  | -0.000000767 | -0.000001167 | -0.000004148 |
| 1  | 0.000000954  | -0.000001433 | 0.000000084  |
| 1  | 0.00000046   | -0.000000543 | -0.000001469 |
| 7  | -0.000001548 | 0.000000746  | 0.000004857  |
| 7  | 0.000001002  | 0.000002482  | 0.000003613  |
| 6  | 0.000000806  | 0.000004049  | -0.00000558  |
| 6  | 0.000002192  | 0.000002519  | 0.000000275  |
| 6  | 0.00000187   | -0.000003885 | -0.000002165 |
| 6  | 0.000000356  | -0.000000037 | -0.000000252 |
| 6  | 0.000000512  | 0.000000323  | -0.000001322 |
| 6  | -0.000000715 | 0.000000531  | -0.000001936 |
| 1  | 0.000000679  | 0.000000461  | -0.000000773 |
| 1  | 0.000001319  | 0.000000719  | -0.000002367 |

|   |              |              |              |
|---|--------------|--------------|--------------|
| 1 | 0.000000187  | 0.000000767  | -0.000002046 |
| 6 | -0.000003208 | -0.000000995 | 0.000000187  |
| 6 | 0.00000142   | -0.000000219 | 0.000000316  |
| 6 | 0.000001633  | -0.000003682 | 0.00000255   |
| 6 | -0.000000353 | -0.000001504 | 0.000000308  |
| 6 | -0.000000497 | -0.000000639 | 0.000001508  |
| 6 | -0.000000787 | -0.000001065 | 0.000000786  |
| 1 | 0.000000607  | -0.000002621 | 0.000000843  |
| 1 | 0.000000311  | -0.000002098 | 0.000000638  |
| 1 | 0.000000121  | -0.000002052 | 0.000001893  |
| 6 | 0.000001119  | -0.000000745 | -0.000000714 |
| 6 | 0.000000488  | -0.000002654 | 0.000000409  |
| 6 | -0.00000187  | -0.000002437 | 0.000000758  |
| 1 | 0.000000473  | -0.000000434 | 0.000000545  |
| 1 | 0.000000706  | -0.000002182 | 0.000000047  |
| 1 | 0.000000454  | -0.000002066 | -0.000000795 |
| 1 | 0.000000205  | -0.00000247  | -0.000000238 |
| 1 | 0.000000584  | -0.000001259 | 0.000000734  |
| 1 | 0.000000328  | -0.000001465 | 0.000000556  |
| 1 | 0.000001016  | -0.000001656 | -0.000000898 |
| 6 | 0.000001029  | 0.000000244  | -0.000000542 |
| 6 | 0.000000933  | 0.00000007   | 0.000000314  |
| 6 | -0.000000749 | -0.000000803 | 0.000000183  |
| 1 | 0.000000335  | -0.000000202 | 0.000000248  |
| 1 | -0.000000727 | -0.000000527 | 0.000000835  |
| 1 | -0.000000626 | -0.000000418 | 0.000000681  |
| 1 | -0.000000919 | -0.000000909 | 0.000000735  |
| 1 | -0.000000184 | -0.000001877 | 0.000000322  |
| 1 | 0.000000703  | -0.000001252 | 0.000001016  |
| 1 | -0.000000446 | -0.000001534 | 0.000000094  |
| 6 | 0.000000246  | 0.000000502  | 0.000000744  |
| 6 | 0.00000074   | -0.000001964 | -0.00000286  |
| 6 | 0.000000383  | 0.000000397  | -0.000002865 |
| 1 | 0.000002621  | -0.000000975 | -0.000002167 |
| 1 | 0.000001034  | 0.000001232  | -0.00000053  |
| 1 | 0.000001275  | -0.000001238 | -0.000000668 |
| 1 | 0.000000092  | 0.000000637  | -0.000001624 |
| 1 | 0.000000956  | -0.000002289 | -0.000001997 |
| 1 | 0.000001078  | 0.000000025  | -0.000002611 |
| 1 | 0.00000107   | -0.000001107 | -0.000001751 |
| 6 | -0.000002632 | -0.000003363 | -0.000000034 |
| 6 | 0.000001186  | 0.000002065  | -0.000000813 |
| 6 | -0.000000797 | 0.000003089  | -0.000002803 |
| 1 | 0.000000033  | 0.000000319  | -0.000000354 |

|    |              |              |              |
|----|--------------|--------------|--------------|
| 1  | 0.000000458  | -0.000000062 | -0.000000728 |
| 1  | 0.000000291  | 0.000000461  | -0.000000558 |
| 1  | -0.000000186 | 0.000000501  | -0.000001128 |
| 1  | 0.000000584  | 0.000001572  | 0.000000221  |
| 1  | -0.000000308 | 0.000001715  | -0.000000135 |
| 1  | 0.000000431  | 0.000001073  | 0.000000225  |
| 6  | 0.000000044  | -0.000000285 | -0.000001868 |
| 6  | -0.000000845 | 0.000001915  | 0.000000555  |
| 6  | -0.000000216 | 0.000001928  | -0.000001239 |
| 6  | -0.000000001 | 0.000001847  | 0.000000714  |
| 6  | -0.000003027 | 0.00000301   | -0.000001924 |
| 1  | -0.000000153 | 0.000002379  | 0.000000136  |
| 1  | 0.00000068   | 0.000001167  | 0.000000405  |
| 7  | 0.000003067  | 0.000000721  | 0.000001215  |
| 8  | -0.000006938 | -0.000001254 | 0.000002059  |
| 1  | -0.000000935 | 0.000002556  | 0.000000041  |
| 1  | -0.000000342 | 0.000001138  | -0.000000005 |
| 17 | 0.000001694  | 0.000000774  | 0.000001736  |

Zero-point correction=

1.165665 (Hartree/Particle)

Thermal correction to Energy=

1.243012

Thermal correction to Enthalpy=

1.243957

Thermal correction to Gibbs Free Energy=

1.042464

Sum of electronic and zero-point Energies=

-4515.457073

Sum of electronic and thermal Energies=

-4515.379725

Sum of electronic and thermal Enthalpies=

-4515.378781

Sum of electronic and thermal Free Energies=

-4515.580273

Re5

|    |              |              |              |
|----|--------------|--------------|--------------|
| 6  | -0.000000796 | -0.000001653 | 0.000000445  |
| 6  | 0.000003023  | 0.000000643  | -0.000002529 |
| 7  | 0.000003684  | 0.000003402  | 0.000001025  |
| 7  | -0.00000557  | -0.000004744 | 0.000001128  |
| 16 | -0.000000139 | 0.000001141  | 0.000000137  |
| 8  | -0.000002232 | 0.000002154  | 0.000000007  |
| 8  | -0.00000068  | 0.000001796  | -0.000000274 |
| 6  | -0.000000303 | -0.000000077 | -0.000000027 |
| 6  | -0.000001621 | 0.000001272  | 0.000000287  |
| 6  | -0.000001466 | 0.000000796  | 0.000000625  |
| 6  | -0.000002126 | 0.000000249  | 0.000001023  |
| 6  | -0.00000183  | 0.000000091  | 0.000001467  |
| 6  | -0.00000192  | 0.000000905  | 0.000000166  |
| 1  | -0.000000578 | 0.000001294  | -0.000000463 |
| 1  | -0.000001677 | 0.000000968  | 0.000000631  |
| 1  | -0.00000182  | -0.000000327 | 0.000001514  |

|   |              |              |               |
|---|--------------|--------------|---------------|
| 1 | -0.000001355 | 0.000000551  | 0.000000094   |
| 6 | -0.000002095 | 0.000000211  | 0.000001531   |
| 1 | -0.000002712 | -0.000000198 | 0.000001998   |
| 1 | -0.000002614 | 0.000000041  | 0.000001673   |
| 1 | -0.000002046 | -0.000000451 | 0.000001681   |
| 6 | -0.000003849 | 0.000001113  | -0.000004667  |
| 1 | 0.000001177  | 0.000000895  | -0.000000597  |
| 1 | 0.000000098  | 0.000001165  | -0.000001067  |
| 6 | 0.000000969  | -0.000001003 | 0.000001529   |
| 1 | -0.000000151 | -0.000001287 | 0.000000098   |
| 1 | 0.000000449  | -0.000002249 | 0.000000441   |
| 8 | -0.000000016 | -0.000000095 | 0.000000092   |
| 6 | 0.00000253   | 0.000002514  | -0.000000203  |
| 6 | -0.000000804 | 0.000001403  | -0.000001611  |
| 6 | 0.000000438  | 0.000000092  | -0.000000916  |
| 6 | 0.000000299  | 0.000000997  | -0.000000436  |
| 1 | -0.000000008 | 0.000002144  | -0.000001228  |
| 6 | 0.000000244  | -0.000000278 | -0.000001036  |
| 1 | 0.000001127  | 0.000000018  | -0.000000627  |
| 6 | 0.000000858  | 0.000001042  | -0.000000691  |
| 1 | -0.000000049 | 0.000001744  | -0.000001119  |
| 1 | 0.000000907  | -0.000000031 | -0.000000057  |
| 1 | 0.000000477  | 0.000000611  | -0.000000753  |
| 6 | 0.000001407  | -0.000001946 | 0.000000779   |
| 6 | 0.000000229  | -0.000001864 | -0.000000329  |
| 6 | 0.000001754  | -0.000002043 | 0.000000388   |
| 6 | 0.000001276  | -0.000002005 | 0.000000639   |
| 1 | 0.000000271  | -0.000001116 | 0.000000552   |
| 6 | 0.00000177   | -0.000002495 | -0.000000349  |
| 1 | 0.000001684  | -0.000002023 | 0.000000488   |
| 6 | 0.000002163  | -0.00000168  | -0.000000029  |
| 1 | 0.000001243  | -0.000001686 | 0.000000217   |
| 1 | 0.000002704  | -0.000002651 | -0.000000105  |
| 1 | 0.000002383  | -0.000002466 | -0.000000264  |
| 8 | -0.000001202 | 0.000003209  | -0.0000010286 |
| 8 | -0.000001365 | -0.000002547 | -0.000000987  |
| 6 | -0.000000084 | -0.000000698 | 0.000000339   |
| 6 | 0.00000068   | 0.000000698  | -0.000001036  |
| 1 | -0.000000123 | 0.000001379  | -0.000001022  |
| 1 | -0.000000638 | 0.000001382  | -0.000000453  |
| 1 | -0.000000582 | 0.00000012   | -0.000000056  |
| 6 | 0.000000059  | -0.000000106 | -0.000000702  |
| 1 | 0.000000608  | 0.000000127  | -0.000000602  |
| 1 | -0.000000073 | 0.000000125  | 0.000000106   |



|                                              |              |              |                             |
|----------------------------------------------|--------------|--------------|-----------------------------|
| 1                                            | 0.000000672  | -0.000000611 | 0.000000215                 |
| 15                                           | 0.000007364  | -0.000002739 | 0.000008616                 |
| 6                                            | -0.00000002  | 0.000002616  | -0.000001085                |
| 1                                            | 0.000001628  | 0.000000337  | -0.000000911                |
| 1                                            | 0.000000532  | 0.000000172  | -0.000000718                |
| 6                                            | -0.000001324 | 0.000000802  | 0.000004541                 |
| 1                                            | -0.000000512 | 0.000000369  | -0.000000495                |
| 1                                            | -0.00000114  | 0.000000004  | 0.00000063                  |
| Zero-point correction=                       |              |              | 0.547382 (Hartree/Particle) |
| Thermal correction to Energy=                |              |              | 0.583431                    |
| Thermal correction to Enthalpy=              |              |              | 0.584376                    |
| Thermal correction to Gibbs Free Energy=     |              |              | 0.472343                    |
| Sum of electronic and zero-point Energies=   |              |              | -2310.248909                |
| Sum of electronic and thermal Energies=      |              |              | -2310.212859                |
| Sum of electronic and thermal Enthalpies=    |              |              | -2310.211915                |
| Sum of electronic and thermal Free Energies= |              |              | -2310.323948                |

#### D-1

|    |              |              |              |
|----|--------------|--------------|--------------|
| 6  | -0.000008399 | -0.000004343 | -0.000007445 |
| 6  | -0.00001295  | 0.000006922  | 0.000016742  |
| 7  | 0.00001275   | -0.000008486 | -0.000009307 |
| 7  | 0.000018232  | -0.00000648  | 0.000001968  |
| 16 | -0.000005453 | 0.00000932   | -0.000001752 |
| 8  | -0.000001175 | 0.000001137  | -0.000002643 |
| 8  | 0.000003449  | -0.00000055  | 0.000001518  |
| 6  | -0.000002625 | -0.000000297 | 0.00000216   |
| 6  | -0.000002215 | 0.000000691  | -0.000000052 |
| 6  | -0.000000723 | 0.000000082  | -0.000000462 |
| 6  | -0.000003446 | -0.000000143 | -0.000000753 |
| 6  | -0.000000991 | -0.000000274 | 0.000000531  |
| 6  | -0.000001801 | 0.000000967  | -0.00000282  |
| 1  | -0.000002342 | -0.000000986 | 0.000000592  |
| 1  | -0.000002154 | 0.000000939  | 0.000000653  |
| 1  | -0.000002014 | -0.000000854 | -0.000000374 |
| 1  | -0.000000937 | -0.000001691 | -0.000000796 |
| 6  | -0.000001138 | 0.000000685  | -0.000000557 |
| 1  | -0.000002592 | 0.000000077  | -0.000000254 |
| 1  | -0.000002976 | 0.000000112  | 0.000000157  |
| 1  | -0.000002952 | 0.000000066  | -0.000000024 |
| 6  | -0.000008283 | 0.000000155  | 0.000005751  |
| 1  | 0.000000185  | 0.000000976  | 0.000000443  |
| 1  | 0.000001545  | 0.000001151  | -0.000000789 |
| 6  | -0.000005303 | -0.000000847 | -0.000001174 |
| 1  | -0.00000046  | 0.000001352  | -0.000000692 |

|    |              |              |              |
|----|--------------|--------------|--------------|
| 1  | 0.000000834  | 0.000001936  | 0.000000935  |
| 8  | 0.000002288  | -0.00000062  | 0.000002103  |
| 6  | 0.000002273  | -0.000003311 | -0.00000715  |
| 6  | -0.000000027 | 0.000001474  | 0.000001079  |
| 6  | -0.00000113  | 0.000000326  | 0.000003318  |
| 6  | 0.000000746  | 0.000000704  | 0.000002876  |
| 1  | -0.000000351 | -0.000000901 | -0.000000436 |
| 6  | -0.000000967 | 0.000002672  | 0.000000275  |
| 1  | -0.000001374 | -0.000000807 | -0.000000835 |
| 6  | -0.000000463 | -0.000001179 | -0.000001253 |
| 1  | -0.000000277 | 0.000001303  | 0.000000748  |
| 1  | -0.000000854 | -0.000000207 | -0.000000091 |
| 1  | -0.000000412 | 0.00000009   | 0.000000447  |
| 6  | 0.000002361  | -0.000000026 | -0.000000732 |
| 6  | 0.000003014  | 0.000000917  | -0.000003591 |
| 6  | 0.000000323  | -0.000000803 | 0.000004989  |
| 6  | 0.000002411  | -0.000002882 | 0.000000965  |
| 1  | 0.000000938  | -0.00000043  | -0.000001796 |
| 6  | 0.000002181  | 0.000001358  | -0.000000265 |
| 1  | 0.000002033  | -0.000000115 | -0.000000725 |
| 6  | -0.000001066 | 0.000000371  | -0.000003027 |
| 1  | 0.000001262  | -0.000000661 | -0.000000088 |
| 1  | 0.000001335  | 0.000000396  | 0.000000513  |
| 1  | 0.000001168  | 0.000000221  | 0.000000085  |
| 8  | 0.00000296   | 0.000007249  | 0.000004461  |
| 8  | -0.000001055 | 0.000000358  | 0.000003306  |
| 6  | 0.00000022   | 0.000005038  | 0.000003493  |
| 6  | -0.000000457 | 0.000001204  | -0.000000911 |
| 1  | -0.000001239 | 0.000001326  | 0.000001265  |
| 1  | -0.000002055 | 0.000000995  | 0.000000941  |
| 1  | -0.000001325 | 0.000001063  | 0.000001271  |
| 6  | 0.000001294  | 0.000000504  | -0.00000055  |
| 1  | -0.000000485 | 0.000001463  | 0.000001628  |
| 1  | -0.000001306 | 0.00000174   | 0.000001893  |
| 1  | -0.000001436 | 0.000001891  | 0.000001195  |
| 15 | -0.000008521 | 0.00000275   | -0.000004838 |
| 6  | -0.000002762 | -0.00000163  | -0.00000007  |
| 1  | 0.000000093  | 0.000000817  | -0.000000336 |
| 1  | -0.000001635 | 0.000001047  | 0.000000191  |
| 6  | -0.000002084 | -0.000008114 | -0.000004413 |
| 1  | -0.000001722 | 0.000002667  | 0.000000926  |
| 1  | -0.00000169  | 0.000001646  | 0.000001365  |
| 79 | 0.000001875  | 0.00000231   | 0.000002527  |
| 6  | 0.000005812  | 0.00000312   | -0.000002885 |

|   |              |              |              |
|---|--------------|--------------|--------------|
| 6 | 0.000001694  | -0.000002777 | -0.000001419 |
| 6 | 0.000000426  | -0.000002248 | 0.000002622  |
| 1 | 0.000001653  | 0.000000959  | -0.000001402 |
| 1 | 0.000000695  | -0.000000361 | -0.00000004  |
| 7 | 0.00000017   | 0.000003271  | 0.000002463  |
| 7 | -0.000004854 | 0.000000613  | -0.000002206 |
| 6 | 0.000002248  | -0.000000151 | -0.000001109 |
| 6 | 0.000002626  | -0.000000886 | 0.000002423  |
| 6 | 0.000002004  | 0.000000223  | 0.000001412  |
| 6 | 0.000000126  | 0.000000053  | 0.000000151  |
| 6 | 0.000000468  | 0.000000165  | 0.00000105   |
| 6 | 0.000001101  | 0.000001035  | 0.000000764  |
| 1 | 0.000002849  | 0.000000814  | 0.000000351  |
| 1 | 0.00000121   | 0.000000002  | -0.000000135 |
| 1 | 0.000001591  | 0.0000011    | 0.000000427  |
| 6 | 0.000002926  | 0.000001608  | -0.000000592 |
| 6 | 0.000001252  | -0.000004264 | -0.000001021 |
| 6 | 0.000001115  | -0.000002724 | -0.000001544 |
| 6 | -0.000000626 | -0.000002084 | 0.000001677  |
| 6 | -0.000001166 | -0.000000077 | 0.000000531  |
| 6 | -0.000000198 | -0.000001164 | -0.000000559 |
| 1 | -0.000001686 | -0.000001096 | -0.00000228  |
| 1 | 0.000000388  | -0.00000253  | -0.000001705 |
| 1 | -0.00000009  | -0.000001164 | -0.000000991 |
| 6 | 0.000002295  | 0.00000033   | 0.000004819  |
| 6 | -0.000001375 | -0.00000017  | -0.000001823 |
| 6 | -0.00000083  | 0.000002167  | -0.000003618 |
| 1 | -0.000001496 | -0.000001177 | -0.000002587 |
| 1 | -0.000000262 | -0.000001749 | -0.000000551 |
| 1 | -0.000000165 | -0.000000339 | -0.000000052 |
| 1 | -0.000000924 | -0.000000116 | -0.000002508 |
| 1 | -0.000001173 | -0.000001115 | 0.000000882  |
| 1 | -0.00000026  | -0.000002355 | 0.000000515  |
| 1 | -0.000000665 | -0.000001905 | 0.000000371  |
| 6 | -0.000000459 | 0.000000145  | 0.000000201  |
| 6 | 0.000001788  | 0.000000248  | -0.000001421 |
| 6 | 0.000000722  | -0.000001458 | 0.000000033  |
| 1 | -0.0000007   | -0.000000685 | -0.000001631 |
| 1 | 0.00000051   | -0.000001405 | -0.000000418 |
| 1 | 0.000000547  | -0.000001337 | -0.000000587 |
| 1 | -0.000000966 | -0.000000412 | 0.000000145  |
| 1 | 0.000001429  | -0.000001133 | -0.000000796 |
| 1 | -0.000000215 | -0.000002143 | -0.000001669 |
| 1 | 0.000001196  | -0.000001391 | -0.000000576 |

|   |              |              |              |
|---|--------------|--------------|--------------|
| 6 | 0.000000268  | 0.000000848  | 0.00000066   |
| 6 | -0.000001954 | 0.000000102  | -0.000000336 |
| 6 | 0.000000888  | 0.000001462  | -0.000000476 |
| 1 | 0.000000099  | -0.00000032  | -0.000000098 |
| 1 | -0.000000091 | 0.000000924  | -0.000000618 |
| 1 | 0.000000022  | 0.000000095  | 0.000000635  |
| 1 | 0.000000232  | 0.000000904  | 0.000000581  |
| 1 | 0.000000596  | 0.000000037  | 0.000000208  |
| 1 | 0.000000623  | 0.000000408  | 0.000000624  |
| 1 | 0.000000224  | 0.00000023   | 0.000000629  |
| 6 | 0.000001364  | 0.000001936  | -0.00000267  |
| 6 | 0.00000184   | 0.000000041  | 0.000001348  |
| 6 | 0.000002775  | -0.000003136 | 0.00000062   |
| 1 | 0.00000125   | 0.000000061  | -0.000000369 |
| 1 | 0.000001555  | -0.000000967 | -0.000000602 |
| 1 | 0.000001833  | -0.000000799 | -0.000000244 |
| 1 | 0.00000216   | -0.00000042  | 0.000000021  |
| 1 | 0.000001515  | -0.000000984 | 0.000003288  |
| 1 | 0.000001117  | 0.000000532  | -0.000000088 |
| 1 | 0.000001915  | -0.000000223 | 0.000000222  |

Zero-point correction=

1.121270 (Hartree/Particle)

Thermal correction to Energy=

1.191468

Thermal correction to Enthalpy=

1.192412

Thermal correction to Gibbs Free Energy=

1.002985

Sum of electronic and zero-point Energies=

-3605.086685

Sum of electronic and thermal Energies=

-3605.016487

Sum of electronic and thermal Enthalpies=

-3605.015543

Sum of electronic and thermal Free Energies=

-3605.204970

D-2

|    |              |              |              |
|----|--------------|--------------|--------------|
| 6  | 0.000007804  | -0.000003128 | 0.000005771  |
| 6  | -0.00001743  | 0.000005075  | -0.000000584 |
| 7  | 0.000009562  | 0.000010822  | -0.000005867 |
| 7  | 0.000007918  | -0.000003371 | 0.00000164   |
| 16 | -0.000006658 | -0.000002543 | -0.000001724 |
| 8  | -0.000000609 | 0.000000361  | 0.000000326  |
| 8  | -0.000001869 | 0.000002     | 0.00000002   |
| 6  | 0.000004586  | 0.000004177  | 0.000000874  |
| 6  | 0.00000039   | 0.000000501  | 0.000001074  |
| 6  | 0.000001123  | 0.000002891  | -0.000001728 |
| 6  | 0.000000437  | 0.000001918  | 0.000000329  |
| 6  | 0.000002118  | 0.000004375  | 0.000001481  |
| 6  | -0.000001696 | 0.000002055  | -0.000000408 |
| 1  | 0.000001489  | 0.000002161  | 0.000000449  |

|   |              |              |              |
|---|--------------|--------------|--------------|
| 1 | 0.000002269  | 0.000002183  | -0.000000123 |
| 1 | 0.000000166  | 0.000003245  | 0.000000411  |
| 1 | 0.000000378  | 0.000003117  | 0.000000429  |
| 6 | 0.000001567  | 0.000004032  | -0.000000872 |
| 1 | 0.000001137  | 0.000004007  | 0.000000129  |
| 1 | 0.000003361  | 0.000003336  | -0.000000022 |
| 1 | 0.000001852  | 0.000001962  | 0.000000559  |
| 6 | -0.000000479 | -0.000003386 | 0.000007175  |
| 1 | -0.000001413 | 0.000002815  | 0.000000677  |
| 1 | -0.000002257 | 0.000000683  | 0.000000359  |
| 6 | -0.000002141 | -0.000000155 | 0.000001914  |
| 1 | -0.000001716 | -0.000000673 | 0.000000178  |
| 1 | -0.000002102 | -0.000002074 | -0.000000915 |
| 8 | -0.000001215 | -0.000001785 | 0.000000605  |
| 6 | -0.000000506 | -0.000003017 | -0.000004597 |
| 6 | -0.000001397 | 0.000001117  | 0.000000424  |
| 6 | 0.000000015  | 0.000000509  | 0.000000653  |
| 6 | -0.000000418 | -0.000000987 | 0.000000158  |
| 1 | -0.000001372 | -0.000001199 | 0.000000908  |
| 6 | 0.000000287  | -0.000000233 | -0.000000329 |
| 1 | -0.000000009 | 0.000000733  | 0.000000101  |
| 6 | 0.000000349  | -0.000001044 | -0.000000013 |
| 1 | -0.000000863 | -0.000001554 | -0.000000086 |
| 1 | 0.000000857  | -0.000000174 | -0.000000014 |
| 1 | 0.000000242  | -0.000001179 | -0.000000362 |
| 6 | -0.000000544 | -0.000000555 | 0.000000968  |
| 6 | -0.000004013 | 0.000000209  | -0.000000904 |
| 6 | -0.000004701 | -0.000002101 | 0.000001416  |
| 6 | -0.000001988 | -0.000001502 | 0.000001725  |
| 1 | -0.000002818 | 0.000000128  | 0.000000151  |
| 6 | -0.000001944 | -0.000000971 | 0.000000686  |
| 1 | -0.000002185 | -0.000002549 | 0.000000176  |
| 6 | -0.000005211 | -0.000000404 | 0.000000552  |
| 1 | -0.000003608 | 0.000000272  | 0.000001001  |
| 1 | -0.00000037  | -0.000002302 | 0.000000873  |
| 1 | -0.000003595 | -0.000000819 | 0.000001118  |
| 8 | -0.000000374 | -0.000002186 | 0.000000005  |
| 8 | -0.000001747 | -0.000000612 | 0.000001805  |
| 6 | 0.000001363  | -0.000001184 | -0.000000955 |
| 6 | 0.000002786  | -0.000002046 | -0.000001798 |
| 1 | 0.000001832  | -0.000002228 | -0.000000891 |
| 1 | 0.000001338  | -0.000001218 | -0.000000771 |
| 1 | 0.00000217   | -0.000002323 | -0.000001007 |
| 6 | 0.000001456  | -0.000003416 | -0.000000815 |

|    |              |              |              |
|----|--------------|--------------|--------------|
| 1  | 0.000001048  | -0.000003445 | -0.000000893 |
| 1  | 0.000001503  | -0.000003505 | -0.00000109  |
| 1  | 0.000000391  | -0.000003346 | -0.000000729 |
| 15 | -0.000001654 | -0.000005271 | -0.000003365 |
| 6  | 0.000001891  | -0.000004247 | -0.000002131 |
| 1  | -0.00000009  | -0.000002697 | -0.000000107 |
| 1  | 0.000000141  | -0.000000844 | -0.000001094 |
| 6  | 0.000001489  | -0.000002404 | -0.000000023 |
| 1  | 0.000001016  | -0.000001016 | -0.000000625 |
| 1  | 0.000001319  | -0.000002053 | -0.000000781 |
| 79 | -0.000002189 | -0.000006722 | 0.000001306  |
| 6  | -0.000000972 | 0.000011074  | -0.00000141  |
| 6  | 0.000000075  | 0.000000401  | 0.0000019    |
| 6  | 0.000000412  | -0.00000122  | -0.00000271  |
| 1  | 0.000000545  | 0.000000878  | 0.000000603  |
| 1  | -0.000000135 | 0.000000292  | -0.000000105 |
| 7  | -0.000001038 | -0.00000523  | -0.000000838 |
| 7  | 0.000002763  | -0.000001074 | -0.000000125 |
| 6  | -0.000001635 | 0.000001145  | -0.000001874 |
| 6  | -0.000001732 | 0.000000502  | -0.000000964 |
| 6  | 0.000001262  | -0.000002156 | -0.000001542 |
| 6  | -0.00000302  | -0.000000707 | 0.000001253  |
| 6  | -0.000001936 | -0.000001098 | 0.00000072   |
| 6  | -0.000002308 | -0.00000156  | 0.000000298  |
| 1  | -0.000002668 | -0.000000395 | 0.000000536  |
| 1  | -0.00000118  | -0.000002769 | 0.00000076   |
| 1  | -0.000002749 | -0.000001838 | 0.000000708  |
| 6  | 0.000003174  | 0.000001603  | 0.000002229  |
| 6  | 0.000003125  | -0.000000808 | 0.000000048  |
| 6  | 0.000000574  | 0.000001463  | -0.00000002  |
| 6  | 0.000002067  | 0.000001622  | -0.000000044 |
| 6  | 0.000001902  | 0.000002514  | -0.000001297 |
| 6  | 0.00000278   | 0.000002354  | -0.00000092  |
| 1  | 0.000002903  | 0.000001156  | -0.000001207 |
| 1  | 0.000001874  | 0.000002889  | 0.000000229  |
| 1  | 0.0000033    | 0.000002293  | -0.000000612 |
| 6  | 0.000000923  | 0.000000623  | -0.000002081 |
| 6  | 0.000003236  | -0.000001126 | -0.000000478 |
| 6  | 0.000002145  | -0.000000527 | 0.000000396  |
| 1  | 0.000001528  | -0.000000408 | -0.00000112  |
| 1  | 0.000002662  | 0.000000196  | -0.000000961 |
| 1  | 0.000003078  | -0.000001199 | -0.000000785 |
| 1  | 0.000003415  | 0.000000471  | -0.000001206 |
| 1  | 0.000002453  | -0.000000103 | -0.000000739 |

|   |              |              |              |
|---|--------------|--------------|--------------|
| 1 | 0.000002477  | -0.000000261 | -0.000001718 |
| 1 | 0.000002469  | -0.00000144  | -0.00000076  |
| 6 | -0.000000695 | 0.000001739  | 0.00000022   |
| 6 | 0.000000519  | 0.000002431  | -0.000000225 |
| 6 | 0.000001683  | 0.000002589  | 0.000000809  |
| 1 | 0.000000013  | 0.000002342  | -0.000000628 |
| 1 | 0.000000464  | 0.000003643  | 0.000000766  |
| 1 | -0.000000424 | 0.000003206  | 0.000000281  |
| 1 | 0.000001303  | 0.000003838  | 0.000000919  |
| 1 | 0.000001214  | 0.000002959  | -0.000000185 |
| 1 | 0.000000905  | 0.00000349   | -0.000000321 |
| 1 | 0.000000197  | 0.00000312   | 0.000000513  |
| 6 | -0.000001947 | -0.000002263 | 0.000001415  |
| 6 | 0.000002418  | -0.000001207 | -0.000000144 |
| 6 | 0.000000006  | -0.000002496 | -0.000000911 |
| 1 | 0.000001103  | -0.000001835 | -0.00000012  |
| 1 | -0.000000007 | -0.000002292 | -0.00000058  |
| 1 | 0.000000139  | -0.000002939 | -0.00000108  |
| 1 | -0.000000873 | -0.00000323  | -0.000000595 |
| 1 | -0.000000234 | -0.000001785 | -0.000000501 |
| 1 | -0.000000793 | -0.000002984 | 0.000000024  |
| 1 | 0.000000217  | -0.000002397 | -0.000000462 |
| 6 | -0.000000692 | 0.000001054  | 0.000003604  |
| 6 | -0.000002912 | 0.000000116  | -0.000000317 |
| 6 | -0.000001796 | 0.00000088   | -0.000000213 |
| 1 | -0.000001208 | 0.000001499  | 0.000000979  |
| 1 | -0.000001952 | 0.000000697  | 0.000000737  |
| 1 | -0.00000225  | 0.000001724  | 0.000001029  |
| 1 | -0.000002466 | 0.000000901  | 0.000001245  |
| 1 | -0.000001505 | 0.000000657  | 0.000002487  |
| 1 | -0.00000312  | 0.00000092   | 0.000001288  |
| 1 | -0.000002212 | 0.000001845  | 0.000001142  |

Zero-point correction=

1.122147 (Hartree/Particle)

Thermal correction to Energy=

1.192056

Thermal correction to Enthalpy=

1.193000

Thermal correction to Gibbs Free Energy=

1.005869

Sum of electronic and zero-point Energies=

-3605.091132

Sum of electronic and thermal Energies=

-3605.021223

Sum of electronic and thermal Enthalpies=

-3605.020279

Sum of electronic and thermal Free Energies=

-3605.207410

D-TS1b

|   |              |              |              |
|---|--------------|--------------|--------------|
| 6 | 0.000001443  | -0.000001849 | 0.000002668  |
| 6 | -0.000000108 | 0.000000721  | -0.000000852 |

|    |              |              |              |
|----|--------------|--------------|--------------|
| 7  | -0.00000208  | -0.000000511 | -0.000000092 |
| 7  | -0.000001686 | -0.000000457 | -0.000000012 |
| 16 | 0.000000189  | -0.000000862 | 0.000001747  |
| 8  | -0.000000805 | -0.000000605 | 0.000001051  |
| 8  | -0.000001025 | -0.000000423 | 0.000001296  |
| 6  | 0.000000027  | -0.000001292 | 0.000001676  |
| 6  | -0.000000056 | -0.000001358 | 0.000001587  |
| 6  | -0.000001084 | -0.000000748 | 0.000001463  |
| 6  | 0.000000343  | -0.000001369 | 0.000002273  |
| 6  | 0.000001048  | -0.000001777 | 0.000002819  |
| 6  | -0.000000037 | -0.000001364 | 0.000002351  |
| 1  | -0.000000506 | -0.000000566 | 0.000001486  |
| 1  | -0.000000164 | -0.000001018 | 0.000001993  |
| 1  | 0.000000651  | -0.00000131  | 0.000002639  |
| 1  | 0.000000058  | -0.000000971 | 0.000002059  |
| 6  | 0.000000542  | -0.0000013   | 0.000002676  |
| 1  | 0.000000536  | -0.000001795 | 0.000002147  |
| 1  | 0.000000622  | -0.000001546 | 0.000003238  |
| 1  | 0.000000024  | -0.000000826 | 0.000002681  |
| 6  | 0.000000216  | -0.000000548 | 0.000000795  |
| 1  | -0.000000333 | -0.000000807 | 0.000001189  |
| 1  | 0.000000557  | -0.000000635 | 0.000000549  |
| 6  | -0.000000744 | -0.000000119 | -0.000000061 |
| 1  | -0.00000102  | -0.000000969 | 0.000000201  |
| 1  | -0.000000761 | 0.000000178  | 0.000000063  |
| 8  | -0.000001015 | -0.000000688 | 0.000000964  |
| 6  | 0.000000361  | -0.000000317 | 0.000001663  |
| 6  | 0.000001239  | -0.000001157 | 0.000002383  |
| 6  | -0.000000299 | -0.000000528 | 0.000001476  |
| 6  | 0.000000993  | -0.000000959 | 0.000002039  |
| 1  | 0.000001153  | -0.000000194 | 0.000000796  |
| 6  | 0.000000484  | -0.000001222 | 0.000002087  |
| 1  | 0.000000099  | -0.000001217 | 0.00000149   |
| 6  | 0.000001368  | -0.000000966 | 0.000001862  |
| 1  | 0.000001498  | -0.000000653 | 0.00000169   |
| 1  | 0.000000555  | -0.000001192 | 0.000002439  |
| 1  | 0.000001362  | -0.000001029 | 0.000002344  |
| 6  | -0.000001422 | -0.000000088 | -0.000000566 |
| 6  | -0.000002101 | -0.00000003  | 0.000000396  |
| 6  | -0.000001414 | -0.000000479 | -0.00000107  |
| 6  | -0.000002182 | 0.0000001    | -0.000000649 |
| 1  | -0.000001976 | -0.000000433 | 0.000000307  |
| 6  | -0.00000201  | 0.000000278  | -0.000001115 |
| 1  | -0.000001664 | 0.000000011  | 0.000000028  |



|    |              |              |              |
|----|--------------|--------------|--------------|
| 6  | -0.000001918 | 0.00000013   | -0.000000689 |
| 1  | -0.000002693 | -0.00000025  | -0.000000466 |
| 1  | -0.000001809 | 0.00000041   | -0.000001397 |
| 1  | -0.000002518 | 0.000000156  | -0.000001136 |
| 8  | -0.000001204 | 0.000000369  | 0.000000185  |
| 8  | -0.000000644 | -0.000000319 | 0.000000758  |
| 6  | -0.000000272 | 0.000000236  | -0.000000282 |
| 6  | -0.000000546 | 0.00000021   | -0.000001092 |
| 1  | 0.000000197  | 0.000000597  | -0.000000798 |
| 1  | -0.000000286 | 0.000000741  | -0.000001023 |
| 1  | -0.000000744 | 0.00000053   | -0.000001142 |
| 6  | -0.000000768 | 0.000000158  | -0.000000374 |
| 1  | -0.000000228 | 0.000000098  | -0.000000208 |
| 1  | -0.000000738 | 0.000000069  | -0.000000386 |
| 1  | -0.000000712 | -0.000000336 | -0.000000019 |
| 15 | -0.000000126 | 0.00000003   | -0.000000204 |
| 6  | 0.000000001  | 0.000000184  | -0.000000818 |
| 1  | 0.00000017   | 0.000000216  | -0.000000185 |
| 1  | -0.000000535 | 0.000000075  | -0.000000502 |
| 6  | -0.000000713 | 0.000000033  | -0.000000495 |
| 1  | -0.000001134 | 0.000000254  | -0.000000788 |
| 1  | -0.00000121  | 0.000000043  | -0.000000805 |
| 79 | 0.000001045  | -0.000000075 | 0.000000148  |
| 6  | 0.000000746  | 0.000000232  | -0.000001898 |
| 6  | 0.000000688  | 0.000000753  | -0.000001295 |
| 6  | 0.000000488  | 0.000000761  | -0.000001207 |
| 1  | 0.000000368  | 0.000000871  | -0.00000124  |
| 1  | 0.00000073   | 0.000000929  | -0.000001458 |
| 7  | -0.000000026 | 0.000000817  | -0.000001153 |
| 7  | 0.000000268  | 0.000000306  | -0.000001077 |
| 6  | 0.000000277  | 0.00000078   | -0.000001353 |
| 6  | -0.000000113 | 0.000001467  | -0.000001255 |
| 6  | 0.000001458  | 0.000000932  | -0.00000058  |
| 6  | 0.000000125  | 0.000000652  | -0.000001412 |
| 6  | 0.000001139  | 0.000000627  | -0.000001068 |
| 6  | 0.000001088  | 0.000001128  | -0.000001413 |
| 1  | 0.000000063  | 0.000000827  | -0.000001701 |
| 1  | 0.000001465  | 0.000000923  | -0.000000983 |
| 1  | 0.000000854  | 0.00000081   | -0.000001328 |
| 6  | -0.000000015 | 0.000001472  | -0.000000767 |
| 6  | -0.000000099 | 0.000000049  | -0.000000057 |
| 6  | -0.000000472 | -0.000000024 | -0.000000751 |
| 6  | -0.000000065 | 0.000000284  | -0.000000195 |
| 6  | -0.000000432 | 0.000000171  | -0.000000227 |

|   |              |              |              |
|---|--------------|--------------|--------------|
| 6 | -0.000000189 | 0.000000152  | -0.000000012 |
| 1 | 0.000000454  | -0.000000027 | 0.000000042  |
| 1 | -0.000000949 | -0.000000016 | -0.000000277 |
| 1 | -0.000000334 | -0.000000119 | 0.000000102  |
| 6 | 0.000002023  | -0.000000048 | -0.000000791 |
| 6 | 0.000001062  | 0.000000462  | -0.000000641 |
| 6 | 0.000001177  | 0.000000039  | 0.000000377  |
| 1 | 0.000001111  | 0.000000462  | -0.000000034 |
| 1 | 0.000000787  | 0.000000928  | -0.000000903 |
| 1 | 0.000001384  | 0.000000066  | -0.000000574 |
| 1 | 0.000001033  | 0.000000454  | -0.000000469 |
| 1 | 0.000000693  | 0.000000088  | 0.000000653  |
| 1 | 0.000001134  | -0.000000024 | 0.000000229  |
| 1 | 0.000001341  | 0.000000544  | -0.000000061 |
| 6 | -0.000000482 | 0.000000195  | -0.000000741 |
| 6 | -0.000001423 | 0.000000162  | -0.000000644 |
| 6 | -0.000000977 | 0.000000573  | -0.000000138 |
| 1 | -0.000000914 | 0.000000712  | -0.000000566 |
| 1 | -0.000000934 | -0.000000023 | -0.000000032 |
| 1 | -0.000001448 | 0.000000044  | -0.000000667 |
| 1 | -0.000001342 | 0.000000242  | -0.000000573 |
| 1 | -0.000000474 | 0.000000077  | -0.000001664 |
| 1 | -0.000001076 | 0.000000482  | -0.000001185 |
| 1 | -0.000001064 | 0.000000538  | -0.000001429 |
| 6 | 0.000001234  | 0.000000127  | -0.000000044 |
| 6 | 0.000001329  | 0.000000299  | -0.000000252 |
| 6 | 0.000001822  | 0.000000926  | -0.000000071 |
| 1 | 0.000000885  | 0.000000774  | -0.000000694 |
| 1 | 0.000000628  | -0.000000141 | -0.000000925 |
| 1 | 0.000001439  | 0.000000317  | -0.000000074 |
| 1 | 0.000000014  | 0.000000199  | -0.000000006 |
| 1 | 0.000001712  | 0.000000918  | -0.000001218 |
| 1 | 0.000001969  | 0.000000701  | -0.000000807 |
| 1 | 0.000001935  | 0.000000736  | -0.000000575 |
| 6 | 0.000000538  | 0.000000319  | -0.000001131 |
| 6 | -0.000000397 | 0.000001304  | -0.000001815 |
| 6 | -0.000000552 | 0.000001143  | -0.000002333 |
| 1 | -0.000000277 | 0.000000929  | -0.000001557 |
| 1 | 0.000000217  | 0.000001271  | -0.000002234 |
| 1 | -0.000000363 | 0.000000013  | -0.000002458 |
| 1 | 0            | 0.000001104  | -0.000002227 |
| 1 | 0.000000129  | 0.000000715  | -0.000001408 |
| 1 | -0.000000602 | 0.000000959  | -0.000001642 |
| 1 | -0.000000084 | 0.000000521  | -0.000001419 |

|    |              |              |             |
|----|--------------|--------------|-------------|
| 6  | 0.000000188  | -0.000000425 | 0.000000916 |
| 6  | -0.000000002 | -0.000000668 | 0.000000666 |
| 6  | 0.000000631  | -0.000000464 | 0.000001204 |
| 6  | 0.000000909  | -0.000000628 | 0.000000995 |
| 6  | 0.000000699  | -0.000000727 | 0.000000999 |
| 1  | 0.000000518  | -0.000000455 | 0.000001212 |
| 1  | -0.000000702 | -0.000000192 | 0.000000288 |
| 7  | -0.000000304 | -0.000001318 | 0.000000286 |
| 8  | 0.000001246  | 0.00000144   | 0.000001972 |
| 1  | 0.000001332  | -0.000000374 | 0.00000126  |
| 1  | -0.00000007  | -0.000000438 | 0.000000788 |
| 17 | 0.000001562  | -0.000000505 | 0.00000108  |

|                                              |                             |
|----------------------------------------------|-----------------------------|
| Zero-point correction=                       | 1.206315 (Hartree/Particle) |
| Thermal correction to Energy=                | 1.282772                    |
| Thermal correction to Enthalpy=              | 1.283716                    |
| Thermal correction to Gibbs Free Energy=     | 1.085791                    |
| Sum of electronic and zero-point Energies=   | -4388.010588                |
| Sum of electronic and thermal Energies=      | -4387.934131                |
| Sum of electronic and thermal Enthalpies=    | -4387.933187                |
| Sum of electronic and thermal Free Energies= | -4388.131113                |

#### D-1b

|    |              |              |              |
|----|--------------|--------------|--------------|
| 6  | -0.000010367 | 0.000013148  | 0.000015766  |
| 6  | 0.000004462  | 0.000000115  | -0.000009451 |
| 7  | 0.000001815  | -0.000008701 | 0.000005057  |
| 7  | -0.000002132 | 0.000006268  | 0.000005879  |
| 16 | 0.000000784  | 0.000002113  | -0.00000738  |
| 8  | -0.000002199 | 0.000000604  | 0.00000165   |
| 8  | -0.000003824 | 0.000004846  | 0.000001033  |
| 6  | -0.00000099  | 0.000003283  | -0.000000901 |
| 6  | -0.000000388 | 0.000001206  | 0.000000559  |
| 6  | -0.000001606 | 0.000004361  | 0.000002228  |
| 6  | 0.000000835  | 0.000004423  | -0.000001259 |
| 6  | 0.000001224  | 0.00000226   | 0.00000144   |
| 6  | -0.000000427 | 0.000004362  | 0.000001478  |
| 1  | 0.000001088  | 0.000003514  | 0.000000038  |
| 1  | 0.000001173  | 0.000004218  | 0.000000897  |
| 1  | 0.000000555  | 0.000003943  | 0.000000832  |
| 1  | 0.000000343  | 0.000002291  | 0.000001296  |
| 6  | 0.000001466  | 0.000004469  | 0.00000204   |
| 1  | 0.000001153  | 0.000004906  | 0.000001356  |
| 1  | 0.000001509  | 0.000004763  | 0.000002007  |
| 1  | 0.000001603  | 0.000004414  | 0.00000142   |
| 6  | -0.000000846 | 0.000007577  | -0.000003113 |

|    |              |              |              |
|----|--------------|--------------|--------------|
| 1  | -0.000002205 | 0.000002548  | -0.000002679 |
| 1  | -0.000000989 | 0.000000236  | 0.000000341  |
| 6  | 0.000004032  | -0.000000319 | -0.000002578 |
| 1  | -0.000003424 | 0.000000001  | 0.000000305  |
| 1  | -0.000001657 | -0.000000579 | -0.000000728 |
| 8  | -0.000003052 | 0.000001841  | 0.000002918  |
| 6  | -0.000000904 | 0.000000095  | 0.000002395  |
| 6  | -0.00000035  | 0.000001898  | -0.000000661 |
| 6  | -0.000001041 | 0.000004623  | -0.000001488 |
| 6  | -0.000000067 | 0.00000178   | -0.000000172 |
| 1  | -0.000000943 | 0.000000764  | -0.000000348 |
| 6  | -0.000001533 | 0.00000351   | 0.000000351  |
| 1  | -0.000001623 | 0.000002532  | -0.000001119 |
| 6  | -0.00000104  | 0.000002263  | -0.000000058 |
| 1  | -0.000000309 | 0.000002089  | 0.00000035   |
| 1  | -0.000001358 | 0.000003737  | -0.000000408 |
| 1  | -0.000000441 | 0.000003797  | 0.000000378  |
| 6  | -0.000003262 | 0.000001455  | -0.000001051 |
| 6  | -0.000001444 | 0.000001237  | -0.000000737 |
| 6  | -0.000001924 | -0.000000687 | -0.000000397 |
| 6  | -0.000003292 | 0.000000037  | -0.000001999 |
| 1  | -0.000002397 | 0.000000826  | -0.00000134  |
| 6  | -0.0000021   | -0.000000851 | -0.000001281 |
| 1  | -0.000000907 | -0.000001661 | -0.000000856 |
| 6  | -0.000001985 | -0.000000437 | -0.000002048 |
| 1  | -0.000003404 | 0.000000593  | -0.000001566 |
| 1  | -0.000002    | -0.000001606 | -0.000001347 |
| 1  | -0.000002724 | -0.000000578 | -0.00000154  |
| 8  | -0.00000301  | 0.000008185  | -0.000002163 |
| 8  | -0.000002872 | 0.000002701  | -0.000001324 |
| 6  | -0.000002279 | -0.000000352 | -0.000000524 |
| 6  | -0.000002411 | -0.000002429 | -0.000001097 |
| 1  | -0.000001864 | -0.000002044 | -0.000001491 |
| 1  | -0.000001989 | -0.000002305 | -0.000001131 |
| 1  | -0.000002755 | -0.000002066 | -0.000001915 |
| 6  | -0.000003597 | -0.000001685 | -0.00000016  |
| 1  | -0.00000285  | -0.00000101  | -0.00000172  |
| 1  | -0.00000323  | -0.00000074  | -0.000001965 |
| 1  | -0.000002917 | -0.000000111 | -0.000001469 |
| 15 | -0.000001479 | -0.000006935 | -0.000004354 |
| 6  | 0.000000642  | -0.000002296 | -0.000000498 |
| 1  | -0.000001826 | -0.000000743 | -0.000001206 |
| 1  | -0.000001569 | -0.000000877 | -0.000001046 |
| 6  | -0.000004083 | -0.000003526 | -0.000003895 |

|    |              |              |              |
|----|--------------|--------------|--------------|
| 1  | -0.00000218  | -0.000001385 | -0.000001151 |
| 1  | -0.000002536 | -0.000001051 | -0.000001382 |
| 79 | 0.000004926  | -0.000003985 | 0.000003732  |
| 6  | 0.000001635  | 0.000002543  | 0.00000241   |
| 6  | 0.00000266   | 0.000001162  | 0.000001693  |
| 6  | 0.000002645  | -0.000000475 | 0.000001138  |
| 1  | 0.000001992  | -0.000002292 | -0.000000019 |
| 1  | 0.000001053  | -0.000003909 | 0.000000498  |
| 7  | -0.000005669 | -0.000003205 | -0.000001036 |
| 7  | 0.000000625  | -0.000005884 | -0.000002391 |
| 6  | 0.000005134  | -0.000003868 | -0.000000165 |
| 6  | -0.000002133 | -0.000002422 | -0.000000721 |
| 6  | 0.000000281  | -0.000001626 | 0.000001193  |
| 6  | -0.00000059  | -0.000003081 | -0.000000462 |
| 6  | 0.000000296  | -0.000003299 | -0.000000732 |
| 6  | 0.000000695  | -0.000002833 | -0.000000878 |
| 1  | -0.00000051  | -0.000003053 | -0.000000738 |
| 1  | 0.000000198  | -0.000002829 | -0.000000346 |
| 1  | -0.00000078  | -0.000003443 | -0.000000958 |
| 6  | 0.000001232  | 0.000000289  | -0.000001115 |
| 6  | 0.000000649  | -0.000003115 | 0.000002297  |
| 6  | 0.00000077   | 0.000000884  | 0.00000247   |
| 6  | 0.000003344  | 0.000001611  | 0.00000066   |
| 6  | 0.000000828  | 0.000001022  | 0.000000885  |
| 6  | 0.000001956  | 0.000000249  | 0.000000582  |
| 1  | 0.000003041  | 0.00000055   | 0.000001921  |
| 1  | 0.000001428  | 0.000000719  | 0.000000662  |
| 1  | 0.000002297  | 0.000001326  | 0.000001387  |
| 6  | 0.0000049    | 0.000002795  | 0.000000918  |
| 6  | 0.000002678  | -0.000002085 | 0.000001631  |
| 6  | 0.000000991  | -0.000000784 | 0.000001263  |
| 1  | 0.000002584  | -0.000001244 | 0.000001089  |
| 1  | 0.000003291  | -0.00000149  | 0.000001517  |
| 1  | 0.000003411  | -0.000001258 | 0.00000187   |
| 1  | 0.000003474  | -0.000000425 | 0.000001714  |
| 1  | 0.000001998  | 0.000000212  | 0.00000065   |
| 1  | 0.000002988  | 0.000000274  | 0.000001786  |
| 1  | 0.000003007  | -0.000000372 | 0.000001621  |
| 6  | 0.000000772  | -0.000000866 | -0.000000449 |
| 6  | -0.000000152 | -0.000000886 | 0.000001193  |
| 6  | 0.000000329  | -0.000001631 | 0.000000074  |
| 1  | 0.000000921  | -0.000000863 | -0.000000227 |
| 1  | -0.000000099 | 0.000001058  | 0.000000541  |
| 1  | -0.000000194 | 0.000000007  | -0.000000559 |

|    |              |              |              |
|----|--------------|--------------|--------------|
| 1  | 0.000000064  | 0.000000166  | 0.000000067  |
| 1  | 0.000000059  | -0.000001378 | 0.00000118   |
| 1  | 0.000001639  | -0.000000652 | 0.000000836  |
| 1  | 0.000000541  | -0.000001286 | -0.000000223 |
| 6  | -0.000000095 | -0.000002548 | -0.000001603 |
| 6  | 0.000001888  | -0.000001981 | 0.000000862  |
| 6  | 0.000002172  | -0.00000255  | 0.000000886  |
| 1  | 0.000000334  | -0.000003064 | -0.000000031 |
| 1  | 0.000000343  | -0.000000557 | -0.000000787 |
| 1  | 0.000001643  | -0.00000113  | 0.000000477  |
| 1  | -0.000000212 | -0.000000676 | 0.000000149  |
| 1  | 0.00000221   | -0.000002728 | 0.000000758  |
| 1  | 0.000001874  | -0.000004016 | 0.000000069  |
| 1  | 0.000002336  | -0.000001912 | 0.000000638  |
| 6  | 0.000001571  | -0.000002253 | -0.000000447 |
| 6  | -0.00000088  | -0.000004202 | -0.000000764 |
| 6  | -0.000002122 | -0.000002681 | -0.000000006 |
| 1  | -0.00000022  | -0.000002021 | -0.000000715 |
| 1  | 0.000000443  | -0.000004065 | -0.000000069 |
| 1  | -0.0000001   | -0.000003813 | -0.000000747 |
| 1  | -0.000000021 | -0.000004126 | -0.000000827 |
| 1  | -0.00000038  | -0.000001759 | -0.000001192 |
| 1  | -0.000000841 | -0.000002958 | -0.000001615 |
| 1  | -0.000000768 | -0.000002584 | -0.000000987 |
| 6  | 0.000000633  | 0.000006477  | -0.000002795 |
| 6  | 0.000002425  | -0.000001763 | 0.000000918  |
| 6  | 0.000001154  | 0.000002364  | 0.000003382  |
| 6  | 0.000001925  | 0.00000286   | 0.000000699  |
| 6  | 0.000002413  | 0.000000671  | -0.00000035  |
| 1  | 0.000002236  | 0.000002212  | 0.000001391  |
| 1  | 0.000000422  | 0.000000274  | 0.000001265  |
| 7  | -0.000003941 | 0.000012628  | 0.000005628  |
| 8  | 0.000008041  | -0.000019198 | -0.00000785  |
| 1  | 0.000001756  | 0.000001407  | 0.000001306  |
| 1  | 0.000001136  | 0.000002921  | 0.000001023  |
| 17 | 0.000000801  | 0.000001586  | 0.000001065  |

Zero-point correction=

1.208012 (Hartree/Particle)

Thermal correction to Energy=

1.284323

Thermal correction to Enthalpy=

1.285268

Thermal correction to Gibbs Free Energy=

1.088199

Sum of electronic and zero-point Energies=

-4388.022297

Sum of electronic and thermal Energies=

-4387.945985

Sum of electronic and thermal Enthalpies=

-4387.945041

Sum of electronic and thermal Free Energies=

-4388.142110

D-TS1a

|    |              |              |              |
|----|--------------|--------------|--------------|
| 6  | -0.000000589 | -0.000000061 | -0.000000083 |
| 6  | 0.000000062  | 0.000000359  | -0.000000629 |
| 7  | 0.000000213  | 0.000000446  | -0.000000315 |
| 7  | 0.000000387  | -0.000000007 | 0.000000307  |
| 16 | -0.000000155 | -0.000000744 | -0.000001074 |
| 8  | -0.000000061 | 0.000000112  | -0.000000397 |
| 8  | -0.000000577 | 0.000000149  | -0.000001044 |
| 6  | -0.000000045 | 0.000000022  | -0.000000131 |
| 6  | -0.000000571 | 0.000000204  | -0.000001477 |
| 6  | -0.000000576 | 0.000000092  | -0.000001504 |
| 6  | -0.000000525 | 0.000000255  | -0.000002055 |
| 6  | -0.000000623 | 0.000000232  | -0.000002324 |
| 6  | -0.000000047 | -0.000000028 | -0.000000165 |
| 1  | -0.000000368 | 0.000000124  | -0.000001262 |
| 1  | -0.000000521 | 0.000000172  | -0.000001847 |
| 1  | -0.000000533 | 0.000000205  | -0.000002222 |
| 1  | -0.000000496 | 0.000000095  | -0.000001555 |
| 6  | -0.000000557 | 0.000000226  | -0.000002446 |
| 1  | -0.000000439 | 0.000000215  | -0.000002704 |
| 1  | -0.000000429 | 0.000000171  | -0.000002455 |
| 1  | -0.000000831 | 0.000000407  | -0.000002511 |
| 6  | 0.000000062  | 0.000000337  | -0.000001042 |
| 1  | -0.000000028 | 0.000000134  | -0.000000481 |
| 1  | 0.000000679  | -0.000000267 | -0.000000683 |
| 6  | 0.000000774  | 0.000000144  | -0.000000301 |
| 1  | 0.000001127  | 0.000000126  | 0.000000059  |
| 1  | 0.000000529  | 0.000000782  | -0.000000647 |
| 8  | -0.000000015 | 0.000000064  | 0.000000103  |
| 6  | 0.000000555  | 0.000000023  | -0.000001312 |
| 6  | 0.000000025  | 0.000000343  | -0.000000931 |
| 6  | 0.000000509  | 0.000000362  | -0.000001702 |
| 6  | 0.000000386  | 0.000000457  | -0.000001722 |
| 1  | 0.000000463  | 0.000000005  | -0.000001208 |
| 6  | 0.000000618  | 0.000000465  | -0.000001751 |
| 1  | 0.000000034  | 0.000000378  | -0.000000132 |
| 6  | 0.000000664  | 0.000000377  | -0.000001944 |
| 1  | 0.000000626  | 0.000000536  | -0.000001739 |
| 1  | 0.000000064  | 0.000000549  | -0.000001873 |
| 1  | 0.000000767  | 0.000000594  | -0.000002099 |
| 6  | 0.000000819  | 0.000000054  | -0.000000172 |
| 6  | 0.000001175  | 0.000000587  | -0.000000256 |
| 6  | 0.000001031  | 0.000000211  | -0.000000029 |

|    |              |              |              |
|----|--------------|--------------|--------------|
| 6  | 0.000001154  | 0.000000337  | 0.00000045   |
| 1  | 0.000000336  | 0.000000024  | 0.000000897  |
| 6  | 0.000001294  | 0.000000292  | -0.000000525 |
| 1  | 0.000000928  | 0.000000416  | -0.000000756 |
| 6  | 0.000001498  | 0.000000565  | -0.000000406 |
| 1  | 0.00000094   | 0.000000484  | 0.000000321  |
| 1  | 0.000001344  | 0.000000519  | -0.000000771 |
| 1  | 0.000001561  | 0.000000471  | -0.000000231 |
| 8  | 0.000000164  | -0.000000024 | -0.000000025 |
| 8  | 0.000000428  | 0.000000132  | 0.000000545  |
| 6  | 0.000000526  | 0.000000125  | 0.000000992  |
| 6  | 0.000000679  | -0.000000029 | 0.000001194  |
| 1  | 0.000000725  | -0.000000075 | 0.000001517  |
| 1  | 0.000000973  | 0.000000183  | 0.000001187  |
| 1  | 0.000000701  | -0.000000033 | 0.000001255  |
| 6  | 0.000000142  | -0.000000226 | 0.00000118   |
| 1  | 0.000000044  | -0.000000042 | 0.000001564  |
| 1  | 0.000000045  | -0.000000172 | 0.000000974  |
| 1  | -0.000000205 | -0.000000243 | 0.000000948  |
| 15 | -0.000000092 | -0.000000065 | 0.000000847  |
| 6  | 0.000000823  | -0.000000034 | 0.000000866  |
| 1  | 0.000000146  | -0.000000038 | 0.000001234  |
| 1  | 0.000000867  | -0.000000027 | 0.000001205  |
| 6  | 0.000000427  | 0.000000094  | 0.000000886  |
| 1  | 0.000000884  | 0.000000069  | 0.000000578  |
| 1  | 0.000000056  | -0.000000032 | 0.000000057  |
| 79 | -0.000000027 | -0.000000807 | 0.000000224  |
| 6  | -0.000000055 | -0.000000106 | 0.000000254  |
| 6  | -0.000000455 | -0.000000305 | 0.000000741  |
| 6  | -0.000000179 | -0.000000171 | 0.000000782  |
| 1  | -0.000000134 | -0.000000181 | 0.000000977  |
| 1  | -0.000000078 | -0.00000004  | 0.000001014  |
| 7  | -0.000000734 | -0.000000488 | 0.000000764  |
| 7  | -0.000000262 | -0.000000032 | 0.000000676  |
| 6  | -0.000000634 | -0.000000268 | 0.000000447  |
| 6  | -0.000000789 | -0.000000254 | 0.000000887  |
| 6  | -0.000000946 | -0.000000432 | 0.000000274  |
| 6  | -0.000001079 | -0.000000584 | 0.000000878  |
| 6  | -0.000001459 | -0.000000042 | 0.000000287  |
| 6  | -0.000001404 | -0.000000475 | 0.000000593  |
| 1  | -0.000001234 | -0.000000499 | 0.000001158  |
| 1  | -0.000001549 | -0.000000042 | 0.000000217  |
| 1  | -0.000001614 | -0.000000575 | 0.000000587  |
| 6  | 0.000000021  | 0.000000192  | 0.000000709  |



|   |              |              |              |
|---|--------------|--------------|--------------|
| 6 | 0.000000601  | 0.000000327  | 0.000000201  |
| 6 | 0.000000429  | -0.000000167 | 0.000000725  |
| 6 | 0.000000527  | 0.000000571  | 0.000000206  |
| 6 | 0.000001036  | 0.000000005  | 0.000000829  |
| 6 | 0.000001075  | 0.000000037  | 0.000000394  |
| 1 | 0.000000746  | 0.000000297  | -0.000000092 |
| 1 | 0.000001133  | 0.000000187  | 0.000000903  |
| 1 | 0.000001273  | 0.000000314  | 0.000000397  |
| 6 | 0.000000422  | -0.000000165 | -0.000000102 |
| 6 | 0.000000292  | 0.000000233  | 0.000000337  |
| 6 | 0.000000095  | 0.000000056  | -0.000000777 |
| 1 | -0.000000002 | -0.000000188 | 0.000000141  |
| 1 | -0.000000162 | -0.000000192 | 0.000000327  |
| 1 | -0.000000252 | -0.000000053 | -0.000000201 |
| 1 | 0.000000187  | 0.000000125  | 0.000000114  |
| 1 | 0.000000391  | 0.000000481  | -0.000000633 |
| 1 | 0.000000053  | 0.000000062  | -0.000000191 |
| 1 | -0.000000029 | 0.000000126  | -0.000000459 |
| 6 | 0.000000522  | -0.000000117 | 0.000001144  |
| 6 | 0.000000592  | 0.000000037  | 0.000001178  |
| 6 | 0.000000617  | -0.000000009 | 0.000001454  |
| 1 | 0.000000374  | -0.000000141 | 0.000001099  |
| 1 | 0.000001002  | 0.000000443  | 0.000000766  |
| 1 | 0.000000061  | -0.000000025 | 0.000001143  |
| 1 | 0.000000094  | 0.000000035  | 0.000001118  |
| 1 | 0.000000043  | -0.000000096 | 0.000001445  |
| 1 | 0.000000886  | 0.000000077  | 0.000001527  |
| 1 | 0.000000052  | -0.000000016 | 0.000001751  |
| 6 | -0.000001126 | -0.000000222 | 0.000000146  |
| 6 | -0.000001122 | -0.000000387 | -0.000000328 |
| 6 | -0.00000123  | -0.000000393 | 0.000000123  |
| 1 | -0.000000814 | -0.000000279 | -0.000000041 |
| 1 | -0.000000996 | -0.000000246 | -0.000000393 |
| 1 | -0.000001113 | -0.000000201 | -0.000000532 |
| 1 | -0.000001429 | -0.000000418 | -0.000000364 |
| 1 | -0.000001121 | -0.000000415 | 0.000000467  |
| 1 | -0.000001521 | -0.000000473 | 0.000000209  |
| 1 | -0.000001204 | -0.000000342 | -0.000000071 |
| 6 | -0.000000615 | -0.000000378 | 0.000001122  |
| 6 | -0.000000712 | -0.000000408 | 0.000001594  |
| 6 | -0.000000042 | -0.000000003 | 0.000001177  |
| 1 | -0.000000336 | -0.000000341 | 0.000001218  |
| 1 | -0.000000785 | -0.000000485 | 0.000001497  |
| 1 | -0.000000562 | -0.000000046 | 0.000001179  |

|    |              |              |              |
|----|--------------|--------------|--------------|
| 1  | -0.000000994 | -0.000000571 | 0.000001611  |
| 1  | -0.000000422 | -0.000000241 | 0.000001228  |
| 1  | -0.000000675 | -0.000000481 | 0.000001343  |
| 1  | -0.000000028 | -0.000000339 | 0.000001469  |
| 6  | -0.000000643 | 0.000000018  | -0.000000324 |
| 6  | -0.000000835 | -0.000000046 | -0.000000157 |
| 6  | -0.000000537 | -0.000000003 | -0.000000028 |
| 6  | -0.000000276 | 0.000000038  | -0.000000295 |
| 6  | 0.000000061  | 0.000000218  | -0.000000452 |
| 1  | -0.000000662 | -0.000000215 | -0.000000076 |
| 1  | -0.000000618 | -0.000000231 | -0.000000186 |
| 7  | -0.000000925 | 0.000000606  | -0.000000368 |
| 8  | 0.000000622  | -0.000000429 | -0.000000066 |
| 1  | -0.000000111 | 0.000000003  | -0.000000409 |
| 1  | -0.000000842 | -0.000000245 | -0.000000057 |
| 17 | 0.000000334  | 0.000000225  | -0.000000804 |

|                                              |                             |
|----------------------------------------------|-----------------------------|
| Zero-point correction=                       | 1.206620 (Hartree/Particle) |
| Thermal correction to Energy=                | 1.283246                    |
| Thermal correction to Enthalpy=              | 1.284190                    |
| Thermal correction to Gibbs Free Energy=     | 1.082982                    |
| Sum of electronic and zero-point Energies=   | -4388.036967                |
| Sum of electronic and thermal Energies=      | -4387.960341                |
| Sum of electronic and thermal Enthalpies=    | -4387.959396                |
| Sum of electronic and thermal Free Energies= | -4388.160605                |

D-1a

|    |              |               |              |
|----|--------------|---------------|--------------|
| 6  | 0.000007265  | 0.00001065    | 0.000006787  |
| 6  | -0.000001393 | -0.00000667   | -0.000002582 |
| 7  | -0.00000349  | -0.000003508  | -0.000011542 |
| 7  | 0.000009863  | 0.00000311    | 0.000002274  |
| 16 | -0.000001777 | 0.000001817   | 0.000003591  |
| 8  | 0.000000758  | -0.000000422  | 0.000002047  |
| 8  | -0.000001398 | -0.000000549  | -0.000000539 |
| 6  | -0.000000237 | -0.000001039  | -0.000003407 |
| 6  | 0.000001491  | -0.000000813  | 0.000002965  |
| 6  | -0.00000134  | 0.000000108   | -0.000001035 |
| 6  | 0.000001082  | -0.0000009225 | -0.000000964 |
| 6  | -0.000000151 | -0.000001381  | -0.000001302 |
| 6  | -0.000002754 | -0.000001246  | 0.000000241  |
| 1  | 0.000000787  | -0.000000503  | -0.000001091 |
| 1  | 0.000000125  | -0.000001188  | -0.000001729 |
| 1  | -0.000000764 | -0.000002239  | -0.000003206 |
| 1  | -0.0000014   | -0.000001146  | -0.000002872 |
| 6  | -0.000000975 | -0.000003174  | -0.000004419 |

|    |              |              |              |
|----|--------------|--------------|--------------|
| 1  | -0.000001022 | -0.000001363 | -0.000000297 |
| 1  | -0.000001198 | -0.000000237 | -0.000000902 |
| 1  | 0.000001573  | -0.000001238 | 0.000000005  |
| 6  | 0.000000355  | -0.000002347 | 0.000002399  |
| 1  | -0.000000705 | -0.000000196 | -0.000001323 |
| 1  | -0.000000039 | -0.000000492 | -0.000001422 |
| 6  | -0.00000353  | -0.000000883 | -0.000003225 |
| 1  | 0.000001821  | -0.000002102 | 0.000001588  |
| 1  | 0.000001693  | -0.000002285 | 0.000000284  |
| 8  | 0.000002281  | -0.000000184 | 0.000002606  |
| 6  | -0.000000942 | -0.000002914 | -0.000001816 |
| 6  | 0.000000465  | -0.00000292  | -0.000000461 |
| 6  | -0.000000874 | -0.000001245 | -0.000002345 |
| 6  | -0.000001053 | -0.000002057 | -0.000002049 |
| 1  | 0.000000215  | -0.000002702 | -0.000000489 |
| 6  | -0.000000317 | -0.000002732 | -0.000002004 |
| 1  | -0.000001409 | -0.000001909 | -0.000002184 |
| 6  | -0.000000759 | -0.000004723 | -0.000002615 |
| 1  | 0.000000054  | -0.00000387  | -0.000001163 |
| 1  | -0.000001398 | -0.000003025 | -0.000002908 |
| 1  | -0.000000413 | -0.000003657 | -0.000002178 |
| 6  | 0.000002086  | -0.000003587 | 0.000002159  |
| 6  | 0.000002271  | -0.000000288 | 0.000000382  |
| 6  | -0.000000386 | -0.000003445 | 0.000000831  |
| 6  | 0.00000141   | -0.000004009 | 0.000002299  |
| 1  | 0.000001773  | -0.000001471 | 0.000001235  |
| 6  | 0.000002175  | -0.000002168 | -0.000001169 |
| 1  | 0.000000853  | -0.000002016 | -0.00000004  |
| 6  | -0.000000052 | -0.000000644 | 0.000000608  |
| 1  | 0.000001798  | -0.000001401 | 0.000001144  |
| 1  | 0.000000315  | -0.000002426 | -0.000000701 |
| 1  | 0.000001122  | -0.000002602 | -0.000000047 |
| 8  | 0.000000674  | 0.000002098  | 0.000002116  |
| 8  | 0.000000543  | 0.000003502  | 0.000003845  |
| 6  | 0.000002301  | 0.000003426  | 0.000003622  |
| 6  | 0.000000947  | 0.000001728  | 0.000001973  |
| 1  | 0.000001642  | 0.000002125  | 0.000002829  |
| 1  | 0.000000993  | 0.000002503  | 0.000002385  |
| 1  | 0.000001315  | 0.000002499  | 0.000002853  |
| 6  | 0.000002557  | 0.000000478  | 0.000001923  |
| 1  | 0.000002512  | 0.000000958  | 0.000003093  |
| 1  | 0.000002002  | 0.000001336  | 0.000003188  |
| 1  | 0.000001943  | 0.000000452  | 0.000003189  |
| 15 | -0.000000501 | -0.00000136  | 0.000001036  |

|    |              |              |              |
|----|--------------|--------------|--------------|
| 6  | 0.000001962  | -0.000002971 | 0.000002294  |
| 1  | 0.000002261  | 0.000000902  | 0.000002282  |
| 1  | 0.000000996  | 0.000001294  | 0.000001597  |
| 6  | 0.000000504  | -0.000000609 | -0.000000405 |
| 1  | 0.000000884  | 0.000001521  | 0.00000134   |
| 1  | 0.000001232  | 0.000001311  | 0.000002222  |
| 79 | 0.000000021  | -0.000001849 | -0.000002263 |
| 6  | -0.000001144 | 0.000002688  | 0.000001516  |
| 6  | -0.00000049  | 0.000002799  | -0.000000313 |
| 6  | -0.000002526 | 0.000000829  | 0.000000375  |
| 1  | -0.000001844 | 0.000001385  | -0.000002226 |
| 1  | -0.000000968 | 0.000001823  | 0.000000297  |
| 7  | -0.000001108 | 0.000001163  | -0.000000394 |
| 7  | 0.000000295  | 0.000001687  | -0.000001383 |
| 6  | 0.000000033  | 0.000002809  | -0.000000853 |
| 6  | 0.000000639  | 0.000003385  | 0.000001682  |
| 6  | 0.000002763  | 0.000000953  | 0.00000328   |
| 6  | 0.000002001  | 0.000000055  | 0.00000278   |
| 6  | -0.000001306 | 0.000003862  | 0.000001823  |
| 6  | 0.000000615  | 0.000002812  | -0.000000536 |
| 1  | 0.000000814  | 0.000001865  | 0.000001886  |
| 1  | -0.000000083 | 0.000003037  | 0.000001894  |
| 1  | 0.000001001  | 0.000003005  | 0.000002667  |
| 6  | -0.000000955 | 0.000000819  | -0.000003825 |
| 6  | -0.000002503 | 0.000000328  | 0.000003587  |
| 6  | 0.000000604  | -0.000000524 | 0.000000336  |
| 6  | -0.000001275 | -0.000000334 | -0.000002727 |
| 6  | -0.000002961 | 0.000000026  | -0.000001706 |
| 6  | -0.000001293 | 0.000000225  | -0.00000406  |
| 1  | -0.00000206  | 0.000000394  | -0.000001993 |
| 1  | -0.000001598 | -0.000001054 | -0.000002767 |
| 1  | -0.000002349 | -0.000000765 | -0.000002398 |
| 6  | -0.000002317 | 0.000000936  | -0.000005857 |
| 6  | -0.000001452 | 0.00000463   | 0.000000905  |
| 6  | -0.000002157 | -0.000000506 | -0.000001941 |
| 1  | -0.000002748 | 0.000001556  | 0.000000344  |
| 1  | -0.000002456 | 0.000001867  | -0.000002223 |
| 1  | -0.000002158 | 0.00000258   | -0.000001866 |
| 1  | -0.000002557 | 0.000001535  | -0.000003242 |
| 1  | 0.000000562  | 0.00000187   | -0.000001619 |
| 1  | -0.000002056 | 0.00000168   | 0.000000258  |
| 1  | -0.00000116  | 0.000003173  | -0.000000613 |
| 6  | -0.000001597 | -0.000000903 | -0.000002607 |
| 6  | -0.000000275 | -0.000000926 | -0.000000518 |

|    |              |              |              |
|----|--------------|--------------|--------------|
| 6  | -0.000001194 | -0.000000666 | -0.000001616 |
| 1  | -0.000000932 | 0.000000148  | -0.000001273 |
| 1  | -0.000000903 | -0.000001704 | -0.000001103 |
| 1  | -0.000000355 | -0.000001428 | -0.000001629 |
| 1  | -0.000001216 | -0.000001909 | -0.000001847 |
| 1  | -0.000001911 | 0.000000271  | -0.000001866 |
| 1  | -0.000001583 | -0.000000534 | -0.000002466 |
| 1  | -0.000001279 | -0.000000324 | -0.000001814 |
| 6  | -0.000003935 | 0.000001161  | -0.000000764 |
| 6  | 0.000001673  | 0.000004916  | 0.000000756  |
| 6  | 0.000000852  | 0.000004502  | 0.000001748  |
| 1  | -0.000001787 | 0.000001271  | 0.000000016  |
| 1  | -0.000000347 | 0.000001852  | 0.000001547  |
| 1  | -0.000000606 | 0.000003245  | 0.000000708  |
| 1  | -0.000000812 | 0.000002912  | 0.000002005  |
| 1  | -0.000001025 | 0.000003738  | 0.000000644  |
| 1  | -0.000000925 | 0.000002771  | 0.000000257  |
| 1  | -0.000001019 | 0.000004365  | 0.000000078  |
| 6  | -0.000000424 | -0.000000476 | 0.000000303  |
| 6  | 0.000001461  | 0.000001796  | -0.000000059 |
| 6  | 0.000002111  | 0.000000764  | 0.000002406  |
| 1  | -0.000000124 | 0.000000504  | 0.000000412  |
| 1  | -0.000000468 | 0.000001249  | 0.000000216  |
| 1  | 0.000000099  | 0.000000395  | 0.000000457  |
| 1  | -0.000000196 | 0.000000995  | 0.000001193  |
| 1  | 0.000000714  | -0.000000109 | 0.000001075  |
| 1  | 0.000000584  | 0.000000281  | 0.000001317  |
| 1  | 0.000000654  | -0.000000299 | 0.000000451  |
| 6  | 0.000001417  | -0.000000541 | 0.000000167  |
| 6  | 0.000000604  | -0.00000139  | 0.000001122  |
| 6  | 0.000002007  | -0.000000154 | 0.000002521  |
| 6  | 0.00000208   | -0.000000869 | 0.000000781  |
| 6  | 0.00000019   | -0.000002832 | 0.000001877  |
| 1  | 0.000002015  | -0.00000002  | 0.000002081  |
| 1  | 0.000000156  | -0.000000379 | 0.000000292  |
| 7  | 0.000001065  | 0.000000956  | 0.000002711  |
| 8  | -0.00000541  | -0.000007676 | -0.000001918 |
| 1  | 0.000002154  | -0.000001497 | 0.000001849  |
| 1  | 0.000001141  | 0.000000626  | 0.000001382  |
| 17 | 0.000002417  | -0.000001518 | -0.000000162 |

Zero-point correction=

1.209171 (Hartree/Particle)

Thermal correction to Energy=

1.285496

Thermal correction to Enthalpy=

1.286440

Thermal correction to Gibbs Free Energy=

1.087549

|                                              |              |
|----------------------------------------------|--------------|
| Sum of electronic and zero-point Energies=   | -4388.032598 |
| Sum of electronic and thermal Energies=      | -4387.956273 |
| Sum of electronic and thermal Enthalpies=    | -4387.955329 |
| Sum of electronic and thermal Free Energies= | -4388.154220 |

D-TS2a

|    |              |              |              |
|----|--------------|--------------|--------------|
| 6  | 0.000000163  | -0.000000947 | -0.000000561 |
| 6  | 0.000001631  | -0.000000291 | -0.000000803 |
| 7  | -0.000000479 | 0.000000106  | 0.000000012  |
| 7  | -0.000001106 | 0.000000173  | -0.000000607 |
| 16 | 0.000000023  | 0.000000026  | -0.000000313 |
| 8  | 0.000000224  | 0.000000004  | -0.000000106 |
| 8  | -0.000000546 | 0.000000173  | 0.000000134  |
| 6  | -0.000000531 | -0.000000017 | -0.000000054 |
| 6  | -0.000000266 | -0.000000066 | -0.000000689 |
| 6  | -0.000000427 | -0.000000004 | -0.000000779 |
| 6  | -0.000000621 | 0            | -0.000000922 |
| 6  | -0.000001134 | -0.000000012 | -0.000000073 |
| 6  | -0.000000896 | 0.000000045  | -0.000000292 |
| 1  | 0.000000143  | -0.000000007 | -0.000000672 |
| 1  | -0.000000095 | -0.000000057 | -0.000001044 |
| 1  | -0.000001254 | -0.000000088 | -0.000000671 |
| 1  | -0.000000977 | -0.000000106 | -0.000000225 |
| 6  | -0.000000817 | 0.000000001  | -0.000001115 |
| 1  | -0.000001185 | -0.000000165 | -0.000001027 |
| 1  | -0.000000715 | -0.000000015 | -0.000001139 |
| 1  | -0.000000976 | -0.000000174 | -0.000001409 |
| 6  | -0.000000039 | 0.000000047  | -0.000000559 |
| 1  | -0.000000424 | -0.000000349 | -0.000000862 |
| 1  | -0.000000653 | -0.000000072 | -0.000000987 |
| 6  | 0.000000079  | 0.000000022  | -0.000001249 |
| 1  | -0.000000148 | -0.000000014 | -0.000000943 |
| 1  | 0.000000002  | -0.000000022 | -0.000001282 |
| 8  | 0.000000721  | -0.000000014 | -0.000001019 |
| 6  | -0.000001349 | 0.000000263  | -0.000001075 |
| 6  | -0.000001339 | -0.000000053 | -0.000000442 |
| 6  | -0.000000674 | -0.000000447 | -0.000000377 |
| 6  | -0.000001339 | -0.000000224 | -0.000000838 |
| 1  | -0.000001105 | -0.000000144 | -0.000001341 |
| 6  | -0.000001537 | -0.000000089 | 0.000000033  |
| 1  | -0.000000707 | -0.000000025 | -0.000000518 |
| 6  | -0.000001927 | 0.000000068  | -0.000000578 |
| 1  | -0.000001675 | -0.000000186 | -0.000001285 |
| 1  | -0.000001437 | -0.000000113 | -0.000000101 |

|    |              |              |              |
|----|--------------|--------------|--------------|
| 1  | -0.000001962 | -0.000000104 | -0.000000709 |
| 6  | -0.000000168 | -0.000000149 | -0.000001592 |
| 6  | -0.000000715 | -0.000000118 | -0.000001066 |
| 6  | -0.000000347 | 0.000000108  | -0.000001863 |
| 6  | -0.000001186 | -0.000000063 | -0.00000183  |
| 1  | -0.000000659 | -0.000000063 | -0.000001109 |
| 6  | -0.000000113 | -0.000000022 | -0.000001893 |
| 1  | 0.000000266  | -0.000000161 | -0.000001848 |
| 6  | -0.000000518 | -0.000000176 | -0.000002215 |
| 1  | -0.000001061 | -0.00000017  | -0.000001816 |
| 1  | 0.000000045  | -0.000000149 | -0.000002384 |
| 1  | -0.000000634 | -0.000000189 | -0.000002427 |
| 8  | 0.00000065   | -0.000000216 | -0.000001272 |
| 8  | 0.000000125  | -0.000000426 | -0.000002392 |
| 6  | 0.000001055  | 0.000000352  | -0.000000509 |
| 6  | 0.000001027  | 0.000000096  | -0.000000654 |
| 1  | 0.000000951  | -0.000000022 | -0.000000916 |
| 1  | 0.000000713  | -0.000000035 | -0.000000574 |
| 1  | 0.000001306  | 0.000000008  | -0.000000456 |
| 6  | 0.000001322  | -0.00000016  | -0.000001188 |
| 1  | 0.000001333  | 0.000000092  | -0.00000127  |
| 1  | 0.000001588  | 0.00000006   | -0.000001034 |
| 1  | 0.000001292  | -0.000000093 | -0.000001285 |
| 15 | 0.000001062  | -0.000000274 | -0.000000761 |
| 6  | 0.000000518  | 0.000000041  | -0.000000641 |
| 1  | 0.000000635  | -0.000000009 | -0.00000125  |
| 1  | 0.000000581  | -0.000000096 | -0.000001044 |
| 6  | 0.000001159  | 0.000000158  | -0.000000055 |
| 1  | 0.000000713  | 0.000000245  | -0.000000235 |
| 1  | 0.000001212  | 0.000000015  | -0.000000036 |
| 79 | 0.000000091  | 0.000000523  | 0.000000239  |
| 6  | -0.000000031 | -0.000000215 | 0.000000779  |
| 6  | 0.000000066  | 0.000000048  | 0.000001316  |
| 6  | 0.000000397  | 0.000000019  | 0.000001573  |
| 1  | 0.000000131  | 0.000000166  | 0.000001871  |
| 1  | 0.000000031  | 0.000000156  | 0.000001711  |
| 7  | 0.00000012   | 0.00000016   | 0.000001798  |
| 7  | -0.00000018  | -0.000000039 | 0.000000913  |
| 6  | 0.000000189  | 0.000000143  | 0.000000626  |
| 6  | 0.000000224  | 0.000000054  | 0.000001017  |
| 6  | 0.000000758  | -0.00000006  | 0.000000979  |
| 6  | 0.000000322  | -0.000000085 | 0.000000602  |
| 6  | 0.000000056  | 0.00000015   | 0.000000064  |
| 6  | 0.000000395  | 0.000000118  | 0.000000617  |

|   |              |              |             |
|---|--------------|--------------|-------------|
| 1 | -0.000000103 | 0.000000012  | 0.000000571 |
| 1 | 0.000000987  | -0.000000031 | 0.000000757 |
| 1 | 0.000000689  | -0.000000002 | 0.000000537 |
| 6 | -0.000000363 | -0.000000027 | 0.000001011 |
| 6 | 0.000000006  | 0.000000091  | 0.000000935 |
| 6 | -0.000000246 | -0.000000059 | 0.000001232 |
| 6 | 0.000000019  | 0.000000232  | 0.000001169 |
| 6 | -0.000000053 | 0.000000165  | 0.000001072 |
| 6 | -0.000000433 | -0.000000011 | 0.000000978 |
| 1 | 0.000000233  | 0.000000075  | 0.000001003 |
| 1 | -0.000000962 | 0.000000009  | 0.000001112 |
| 1 | -0.000000441 | -0.000000008 | 0.000001023 |
| 6 | 0.000000704  | 0.000000071  | 0.000000955 |
| 6 | 0.000000724  | 0.000000009  | 0.000001512 |
| 6 | 0.000000848  | 0.000000073  | 0.000000677 |
| 1 | 0.000000686  | -0.000000004 | 0.000000978 |
| 1 | 0.000000647  | 0.000000012  | 0.000001693 |
| 1 | 0.000001159  | 0.000000123  | 0.000001392 |
| 1 | 0.000000742  | 0.000000127  | 0.000001479 |
| 1 | 0.000000697  | 0.000000076  | 0.000000433 |
| 1 | 0.000000814  | 0.000000046  | 0.000000705 |
| 1 | 0.000001048  | 0.000000007  | 0.000000684 |
| 6 | -0.000000805 | -0.000000048 | 0.000001263 |
| 6 | -0.000001105 | 0.000000006  | 0.000000898 |
| 6 | -0.000000952 | -0.000000012 | 0.000001643 |
| 1 | -0.000000835 | -0.000000226 | 0.000001233 |
| 1 | -0.000000096 | -0.000000087 | 0.000000789 |
| 1 | -0.000001282 | 0.000000023  | 0.000000972 |
| 1 | -0.000001354 | 0.000000026  | 0.000000869 |
| 1 | -0.000000748 | 0.000000072  | 0.000001809 |
| 1 | -0.000001098 | 0.000000044  | 0.000001693 |
| 1 | -0.000001185 | 0.000000051  | 0.000001609 |
| 6 | 0.000001103  | 0.000000063  | 0.000000921 |
| 6 | 0.000001161  | 0.000000166  | 0.000000589 |
| 6 | 0.000001305  | 0.000000144  | 0.000001127 |
| 1 | 0.000000921  | 0.000000153  | 0.000001007 |
| 1 | 0.000001012  | 0.000000142  | 0.000000384 |
| 1 | 0.000001373  | 0.000000052  | 0.000000505 |
| 1 | 0.000001285  | 0.000000253  | 0.000000433 |
| 1 | 0.000001306  | 0.000000176  | 0.000001478 |
| 1 | 0.00000145   | 0.000000121  | 0.000001105 |
| 1 | 0.000001567  | 0.000000109  | 0.000001197 |
| 6 | -0.000000272 | 0.000000014  | 0.000000829 |
| 6 | -0.000000623 | 0.000000044  | 0.000001447 |



|    |              |              |              |
|----|--------------|--------------|--------------|
| 6  | -0.000000654 | 0.000000183  | 0.000000708  |
| 1  | -0.000000288 | 0.000000032  | 0.000000898  |
| 1  | -0.000000476 | 0.000000003  | 0.000001169  |
| 1  | -0.000000702 | 0.000000076  | 0.000001407  |
| 1  | -0.000000567 | -0.000000086 | 0.000001327  |
| 1  | -0.000000248 | -0.000000049 | 0.000000655  |
| 1  | -0.000000073 | 0.000000197  | 0.000000769  |
| 1  | -0.000000097 | -0.000000127 | 0.000000787  |
| 6  | 0.000000982  | -0.000000018 | -0.000000297 |
| 6  | 0.000001188  | 0.000000076  | -0.000000008 |
| 6  | 0.000000612  | -0.000000248 | -0.000000055 |
| 6  | 0.000000536  | 0.000000252  | -0.000000179 |
| 6  | 0.000000054  | 0.000000011  | -0.000000575 |
| 1  | 0.000000959  | -0.000000048 | -0.000000707 |
| 1  | 0.000000552  | -0.000000055 | -0.000000245 |
| 7  | -0.000000014 | 0.000000193  | -0.000000152 |
| 8  | 0.000000333  | 0.000000844  | -0.000000192 |
| 1  | 0.000000254  | -0.000000006 | -0.000000548 |
| 1  | 0.000001366  | 0.000000004  | -0.000000629 |
| 17 | -0.000000532 | -0.000000057 | -0.000000003 |

Zero-point correction=

1.206562 (Hartree/Particle)

Thermal correction to Energy=

1.283257

Thermal correction to Enthalpy=

1.284201

Thermal correction to Gibbs Free Energy=

1.084134

Sum of electronic and zero-point Energies=

-4388.023739

Sum of electronic and thermal Energies=

-4387.947044

Sum of electronic and thermal Enthalpies=

-4387.946100

Sum of electronic and thermal Free Energies=

-4388.146167

D-2a

|    |              |              |              |
|----|--------------|--------------|--------------|
| 6  | -0.000001429 | 0.000002411  | -0.000000614 |
| 6  | -0.000000047 | -0.000001831 | 0.000000991  |
| 7  | 0.000002582  | 0.000000364  | -0.000006528 |
| 7  | 0.000001143  | -0.000000137 | 0.000002611  |
| 16 | 0.000000248  | -0.000000754 | 0.000001739  |
| 8  | -0.000000387 | 0.000001463  | -0.000000745 |
| 8  | -0.000000504 | 0.000000089  | -0.000000049 |
| 6  | -0.000001284 | 0.000000673  | -0.000001199 |
| 6  | -0.000000846 | 0.000000549  | -0.000000193 |
| 6  | 0.000000107  | 0.000001857  | -0.000001618 |
| 6  | -0.000000579 | 0.000000813  | 0.000000561  |
| 6  | -0.000001887 | 0.000000423  | -0.000002128 |
| 6  | -0.000000046 | 0.000000487  | -0.000000958 |
| 1  | -0.000000547 | 0.000000994  | -0.000000394 |

|   |             |             |             |
|---|-------------|-------------|-------------|
| 1 | -0.00000779 | 0.00001553  | -0.00000084 |
| 1 | -0.00001071 | 0.00000748  | -0.00000102 |
| 1 | -0.00000589 | 0.00000673  | -0.00000929 |
| 6 | -0.00001686 | 0.00002004  | -0.00001313 |
| 1 | -0.00001009 | 0.00001041  | -0.00001424 |
| 1 | -0.00000848 | 0.0000016   | -0.00001378 |
| 1 | -0.00000766 | 0.00001254  | -0.00001242 |
| 6 | -0.00002553 | 0.00000971  | 0.00004332  |
| 1 | 0.00000676  | 0.00001125  | -0.00000014 |
| 1 | 0.00000696  | 0.00000913  | -0.00000378 |
| 6 | 0.00001738  | 0.00000012  | -0.00001149 |
| 1 | 0.00000621  | 0.00000402  | 0.00000679  |
| 1 | 0.00000775  | 0.00000563  | 0.00000944  |
| 8 | -0.00000209 | 0.00001202  | 0.00000697  |
| 6 | -0.00002169 | -0.00000426 | -0.00001169 |
| 6 | 0.00000221  | 0.00000478  | -0.00000737 |
| 6 | 0.00000111  | -0.00000282 | 0.00000901  |
| 6 | -0.00000059 | -0.00000117 | 0.00000272  |
| 1 | -0.00000034 | 0.00000531  | -0.00000373 |
| 6 | 0.00000006  | -0.00000048 | -0.00001157 |
| 1 | -0.00000091 | -0.00000487 | 0.00000027  |
| 6 | -0.00001705 | -0.00000607 | -0.00000451 |
| 1 | -0.00000569 | 0.00000177  | -0.00000637 |
| 1 | -0.00000295 | -0.00000789 | -0.00000071 |
| 1 | -0.00000542 | -0.00000588 | -0.00000463 |
| 6 | 0.00000329  | 0.00000238  | 0.00000724  |
| 6 | 0.00000214  | 0.00000024  | 0.00000271  |
| 6 | 0.00000958  | 0.00000574  | 0.00000173  |
| 6 | 0.00000151  | 0.00000036  | 0.00000048  |
| 1 | 0.00000448  | 0.00000051  | 0.00000193  |
| 6 | 0.00000496  | 0.00001068  | 0.00000306  |
| 1 | 0.00000792  | 0.00001361  | 0.00000054  |
| 6 | 0.00000486  | 0.00000758  | 0.00000314  |
| 1 | 0.00000161  | 0.00000024  | 0.00000085  |
| 1 | 0.00000646  | 0.00001191  | 0.00000298  |
| 1 | 0.00000037  | 0.00000835  | 0.00000071  |
| 8 | 0.00001375  | 0.00003055  | 0.00004393  |
| 8 | 0.00000099  | 0.00000402  | -0.00000211 |
| 6 | -0.00000097 | 0.00001271  | 0.00000864  |
| 6 | 0.0000008   | 0.00000992  | -0.00000842 |
| 1 | 0.00000273  | 0.00001966  | -0.00000148 |
| 1 | 0.00000036  | 0.0000152   | -0.00000553 |
| 1 | 0.00000322  | 0.00001653  | -0.00000104 |
| 6 | 0.00000605  | 0.00001872  | 0.00000051  |

|    |              |              |              |
|----|--------------|--------------|--------------|
| 1  | 0.000000702  | 0.000001887  | 0.00000025   |
| 1  | 0.00000072   | 0.000001648  | 0.00000031   |
| 1  | 0.000000837  | 0.000001554  | 0.000000334  |
| 15 | 0.000001076  | -0.000002213 | -0.000002214 |
| 6  | 0.000000795  | 0.000001202  | 0.000000043  |
| 1  | 0.000000665  | 0.00000202   | 0.000000431  |
| 1  | -0.000000096 | 0.000001258  | -0.000000613 |
| 6  | -0.000001342 | -0.000001247 | -0.000003472 |
| 1  | -0.000000038 | 0.000001456  | 0.000000364  |
| 1  | 0.000000121  | 0.000001638  | 0.000000333  |
| 79 | -0.000001292 | -0.000000191 | -0.000000181 |
| 6  | 0.000000557  | -0.000003113 | 0.000000171  |
| 6  | 0.000000746  | -0.000002153 | 0.000000552  |
| 6  | -0.000000194 | -0.000000137 | 0.000000017  |
| 1  | -0.000000689 | -0.000001539 | -0.000000051 |
| 1  | -0.000000435 | -0.000001023 | 0.000000413  |
| 7  | -0.000002202 | 0.000000193  | 0.000001146  |
| 7  | 0.000001404  | -0.000001113 | -0.000001729 |
| 6  | 0.00000016   | -0.000001122 | -0.000000493 |
| 6  | -0.000000775 | 0.000000119  | 0.000001182  |
| 6  | 0.000000021  | -0.000000712 | 0.000001855  |
| 6  | 0.000000826  | -0.000002212 | 0.000001151  |
| 6  | 0.000000741  | 0.000000403  | 0.000000959  |
| 6  | 0.000001119  | -0.000001254 | 0.000000465  |
| 1  | 0.000000775  | -0.000001097 | 0.000000098  |
| 1  | 0.000001045  | -0.000000949 | 0.000001251  |
| 1  | 0.000001011  | -0.000001014 | 0.000001285  |
| 6  | -0.000001034 | 0.000000806  | -0.000000896 |
| 6  | -0.000000198 | -0.000000661 | -0.000000422 |
| 6  | -0.000001146 | -0.000001928 | 0.000000725  |
| 6  | -0.000001182 | -0.000000079 | -0.000000333 |
| 6  | -0.000000067 | -0.000000167 | -0.000000575 |
| 6  | -0.000000951 | -0.000000132 | -0.000001628 |
| 1  | -0.000000956 | 0.000000142  | -0.000000897 |
| 1  | -0.00000123  | -0.000000644 | -0.000000891 |
| 1  | -0.000001242 | -0.000000167 | -0.000001039 |
| 6  | -0.000001261 | 0.000000228  | -0.000000252 |
| 6  | -0.000000154 | -0.000000721 | -0.000000061 |
| 6  | -0.000000204 | 0.000000072  | -0.000000239 |
| 1  | -0.000000342 | -0.000000102 | -0.000000081 |
| 1  | -0.000000674 | -0.000000672 | -0.000000243 |
| 1  | -0.000000421 | -0.000000312 | -0.000000193 |
| 1  | -0.000000827 | -0.000000298 | -0.000000525 |
| 1  | -0.00000003  | 0.000000073  | -0.000000017 |

|    |              |              |              |
|----|--------------|--------------|--------------|
| 1  | -0.000000564 | 0.000000376  | -0.000000659 |
| 1  | -0.000000042 | 0.000000208  | -0.000000253 |
| 6  | -0.000000856 | -0.000000944 | -0.000000782 |
| 6  | -0.000000706 | -0.000001457 | -0.000000416 |
| 6  | -0.000000733 | -0.000001406 | -0.000000347 |
| 1  | -0.000000827 | -0.000001058 | -0.000000134 |
| 1  | -0.000000834 | -0.000000342 | -0.000000728 |
| 1  | -0.000000664 | -0.000001001 | -0.000000364 |
| 1  | -0.000001167 | -0.000000919 | -0.000000748 |
| 1  | -0.000000895 | -0.000001547 | -0.000000485 |
| 1  | -0.000001369 | -0.000001379 | -0.000000906 |
| 1  | -0.000000958 | -0.000001548 | -0.000000522 |
| 6  | 0.000001242  | -0.000001459 | -0.000001185 |
| 6  | 0.000000116  | -0.000000232 | 0.000000685  |
| 6  | -0.000000301 | -0.000000449 | 0.000000099  |
| 1  | 0.000000245  | -0.000000679 | 0.000000023  |
| 1  | 0.000000978  | 0.000000011  | 0.000000723  |
| 1  | 0.000000332  | 0.000000064  | 0.000000354  |
| 1  | 0.000000081  | -0.000000554 | 0.000000392  |
| 1  | 0.000000291  | -0.000001304 | 0.000000525  |
| 1  | 0.000000811  | -0.000000902 | 0.000000858  |
| 1  | 0.000000586  | -0.000000925 | 0.000000484  |
| 6  | 0.000000651  | -0.000001439 | 0.000000421  |
| 6  | 0.000000034  | -0.000001602 | 0.000000041  |
| 6  | -0.000000093 | -0.000000955 | 0.000000654  |
| 1  | 0.000000044  | -0.000001152 | 0.000000163  |
| 1  | 0.000000167  | -0.000001783 | 0.000000539  |
| 1  | 0.000000073  | -0.000001863 | 0.000000495  |
| 1  | 0.000000388  | -0.000001809 | 0.000000783  |
| 1  | 0.000000331  | -0.000000878 | 0.000000606  |
| 1  | 0.000000516  | -0.000001282 | 0.000000577  |
| 1  | 0.000000095  | -0.000001294 | 0.000000435  |
| 6  | 0.000001323  | -0.000000248 | 0.000000069  |
| 6  | 0.000000822  | 0.000000435  | 0.000000834  |
| 6  | 0.000001087  | 0.000000353  | 0.000001117  |
| 6  | 0.000001217  | -0.000000055 | 0.000000999  |
| 6  | 0.000000818  | 0.000000467  | 0.000000442  |
| 1  | 0.000001347  | 0.000000019  | 0.000001149  |
| 1  | 0.000000393  | 0.000000626  | 0.000000502  |
| 7  | 0.000000806  | -0.000000084 | 0.000001213  |
| 8  | 0.000000349  | 0.000000792  | 0.000000814  |
| 1  | 0.000001392  | -0.000000116 | 0.000001289  |
| 1  | 0.000000853  | 0.000000448  | 0.000000717  |
| 17 | 0.000001206  | -0.000000216 | 0.000001064  |

|                                              |                             |
|----------------------------------------------|-----------------------------|
| Zero-point correction=                       | 1.207937 (Hartree/Particle) |
| Thermal correction to Energy=                | 1.284530                    |
| Thermal correction to Enthalpy=              | 1.285474                    |
| Thermal correction to Gibbs Free Energy=     | 1.085771                    |
| Sum of electronic and zero-point Energies=   | -4388.036471                |
| Sum of electronic and thermal Energies=      | -4387.959878                |
| Sum of electronic and thermal Enthalpies=    | -4387.958934                |
| Sum of electronic and thermal Free Energies= | -4388.158637                |

D-TS2b

|    |              |              |              |
|----|--------------|--------------|--------------|
| 6  | 0.000001001  | -0.000000173 | -0.000000663 |
| 6  | 0.000000684  | 0.000000444  | 0.000002278  |
| 7  | 0.000000125  | 0.000000389  | -0.000000194 |
| 7  | -0.000001721 | 0.000000784  | -0.000001617 |
| 16 | 0.00000103   | 0.000000791  | 0.000000936  |
| 8  | 0.000001152  | 0.000000328  | -0.000000252 |
| 8  | 0.000000895  | -0.000000029 | 0.000000075  |
| 6  | 0.000001018  | 0.000000787  | 0.000000341  |
| 6  | 0.000001494  | 0.000001487  | -0.000000121 |
| 6  | 0.000001498  | 0.000000163  | 0.000000424  |
| 6  | 0.000001824  | 0.000001753  | 0.000000267  |
| 6  | 0.000001932  | 0.000001537  | 0.000000223  |
| 6  | 0.000001173  | 0.000000936  | 0.000000596  |
| 1  | 0.00000158   | 0.000001426  | 0.000000042  |
| 1  | 0.000001987  | 0.000002028  | -0.000000154 |
| 1  | 0.000001851  | 0.000001109  | 0.000000563  |
| 1  | 0.000001314  | 0.000000474  | 0.000000681  |
| 6  | 0.000002227  | 0.000002112  | 0.000000022  |
| 1  | 0.000002194  | 0.000001825  | 0.000000716  |
| 1  | 0.00000269   | 0.000002674  | 0.000000132  |
| 1  | 0.000002003  | 0.000002027  | -0.000000474 |
| 6  | -0.000000026 | 0.000000293  | -0.000000168 |
| 1  | -0.000000086 | 0.000001323  | -0.000000923 |
| 1  | 0.000000896  | 0.000000778  | -0.000000004 |
| 6  | 0.000000535  | 0.000001074  | -0.000000634 |
| 1  | -0.000000459 | 0.000000393  | -0.000001021 |
| 1  | -0.000000411 | 0.000000188  | -0.000000848 |
| 8  | -0.000001605 | -0.000000384 | -0.000001799 |
| 6  | -0.000000027 | -0.000000286 | -0.000000321 |
| 6  | -0.000000421 | -0.00000006  | -0.000000778 |
| 6  | -0.000000387 | -0.000000059 | 0.000000034  |
| 6  | -0.000001053 | -0.000000552 | -0.000000232 |
| 1  | -0.000000519 | 0.000000162  | -0.000000626 |
| 6  | -0.000000277 | -0.000000733 | 0.000000164  |

|    |              |              |              |
|----|--------------|--------------|--------------|
| 1  | 0.00000026   | -0.000000658 | 0.000000347  |
| 6  | -0.000000494 | -0.000000802 | 0.00000004   |
| 1  | -0.000001122 | -0.000000565 | -0.000000309 |
| 1  | -0.000000424 | -0.000001316 | 0.000000716  |
| 1  | -0.000000996 | -0.000001324 | 0.000000338  |
| 6  | -0.000000256 | 0.000001062  | -0.000001106 |
| 6  | -0.000000664 | 0.000001328  | -0.000001638 |
| 6  | 0.000000137  | 0.000001446  | -0.000001518 |
| 6  | -0.000000892 | 0.000001392  | -0.000002149 |
| 1  | -0.000001084 | 0.000000092  | -0.000001512 |
| 6  | 0.000000061  | 0.000001729  | -0.000001523 |
| 1  | 0.000000356  | 0.000001514  | -0.000000918 |
| 6  | -0.000000408 | 0.00000219   | -0.000002085 |
| 1  | -0.00000109  | 0.000001496  | -0.000002237 |
| 1  | 0.000000043  | 0.000002232  | -0.000001578 |
| 1  | -0.000000337 | 0.000002296  | -0.000002255 |
| 8  | -0.000000933 | 0.000000136  | -0.000001665 |
| 8  | -0.000001111 | -0.00000186  | -0.000001429 |
| 6  | -0.000001012 | -0.000000922 | -0.000001439 |
| 6  | -0.000001545 | -0.000000927 | -0.000000694 |
| 1  | -0.000002059 | -0.000001353 | -0.000000711 |
| 1  | -0.000001503 | -0.000000786 | -0.000000967 |
| 1  | -0.000002142 | -0.000000785 | -0.000001343 |
| 6  | -0.000002219 | -0.000000498 | -0.000001414 |
| 1  | -0.000002253 | -0.000001083 | -0.000001145 |
| 1  | -0.00000235  | -0.000000636 | -0.000001596 |
| 1  | -0.000002063 | -0.000000056 | -0.000001388 |
| 15 | -0.000001157 | 0.000001789  | 0.000000083  |
| 6  | -0.000001924 | -0.000000319 | -0.000000839 |
| 1  | -0.000001512 | -0.000000685 | 0.000000063  |
| 1  | -0.000001436 | -0.000001002 | 0.000000329  |
| 6  | -0.000001452 | 0.000000365  | -0.000001501 |
| 1  | -0.000001135 | 0.000000328  | -0.000000933 |
| 1  | -0.000001725 | 0.000000079  | -0.000001453 |
| 79 | -0.00000002  | -0.000000484 | 0.000000191  |
| 6  | 0.000000284  | -0.000001063 | 0.000000423  |
| 6  | 0.000000262  | -0.00000102  | 0.00000012   |
| 6  | 0.000000444  | -0.000001221 | 0.000000128  |
| 1  | 0.000000342  | -0.000001512 | 0.000001719  |
| 1  | 0.000000243  | -0.000000931 | 0.000001147  |
| 7  | 0.000000216  | -0.000000189 | 0.000000046  |
| 7  | 0.000000512  | -0.000001132 | 0.000001155  |
| 6  | 0.000000054  | -0.000000013 | 0.000000441  |
| 6  | -0.000000013 | -0.000000622 | 0.000000005  |

|   |              |              |              |
|---|--------------|--------------|--------------|
| 6 | -0.000000283 | 0.000000188  | 0.000000076  |
| 6 | -0.000000051 | -0.000000004 | -0.000000386 |
| 6 | -0.000000329 | 0.000000827  | 0.000000348  |
| 6 | 0.000000054  | 0.000000333  | -0.000000034 |
| 1 | -0.000000795 | -0.000000074 | -0.000000059 |
| 1 | 0.000000714  | 0.000000914  | -0.000000202 |
| 1 | -0.000000125 | 0.000000676  | -0.000000689 |
| 6 | 0.000000116  | -0.000001204 | 0.000001397  |
| 6 | 0.000000799  | -0.000000833 | 0.000001325  |
| 6 | -0.000000051 | -0.000001293 | 0.000000982  |
| 6 | 0.000000966  | -0.000001313 | 0.000001825  |
| 6 | 0.000000007  | -0.000001716 | 0.00000144   |
| 6 | 0.000000429  | -0.000001628 | 0.000001834  |
| 1 | 0.000001138  | -0.000001139 | 0.000002059  |
| 1 | -0.000000292 | -0.000002046 | 0.000001447  |
| 1 | 0.000000424  | -0.00000177  | 0.000001883  |
| 6 | 0.000001403  | -0.000000745 | 0.000001643  |
| 6 | 0.000001503  | -0.000000922 | 0.00000204   |
| 6 | 0.000001507  | -0.000000485 | 0.000001843  |
| 1 | 0.000001029  | -0.000000469 | 0.000001457  |
| 1 | 0.000001207  | -0.000001147 | 0.000002213  |
| 1 | 0.000001763  | -0.000000764 | 0.00000214   |
| 1 | 0.000001477  | -0.000001172 | 0.000002349  |
| 1 | 0.000001401  | -0.000000146 | 0.000001369  |
| 1 | 0.000001687  | -0.000000521 | 0.000002091  |
| 1 | 0.000001893  | -0.000000049 | 0.000001722  |
| 6 | -0.000000066 | -0.000001861 | 0.000001133  |
| 6 | -0.000000918 | -0.000001641 | 0.000000629  |
| 6 | -0.000000604 | -0.000002405 | 0.000001329  |
| 1 | -0.000000477 | -0.000001491 | 0.000000773  |
| 1 | -0.000000684 | -0.000001449 | 0.000000352  |
| 1 | -0.000001098 | -0.000001774 | 0.000000601  |
| 1 | -0.000001153 | -0.000001863 | 0.000000075  |
| 1 | -0.000000416 | -0.000002158 | 0.000001565  |
| 1 | -0.000000713 | -0.000002472 | 0.000001565  |
| 1 | -0.000001008 | -0.000002339 | 0.000001078  |
| 6 | 0.00000139   | 0.000000075  | 0.000000741  |
| 6 | 0.000001421  | 0.000000062  | -0.000000035 |
| 6 | 0.000001557  | 0.000000045  | 0.000001099  |
| 1 | 0.000000099  | 0.000000047  | 0.000000439  |
| 1 | 0.000001067  | 0.000000609  | 0.000000913  |
| 1 | 0.000001427  | 0.000001132  | 0.00000134   |
| 1 | 0.000001396  | 0.000001546  | -0.000000417 |
| 1 | 0.000001174  | 0.000000368  | 0.000001057  |

|    |              |              |              |
|----|--------------|--------------|--------------|
| 1  | 0.000001524  | 0.000000476  | 0.000000685  |
| 1  | 0.00000146   | 0.000000367  | 0.000000913  |
| 6  | -0.000000795 | -0.000000895 | 0.000000324  |
| 6  | -0.000000716 | -0.000001276 | 0.000000273  |
| 6  | -0.000001188 | -0.000000583 | -0.00000015  |
| 1  | -0.000000498 | -0.000000918 | -0.000000075 |
| 1  | -0.000000473 | -0.000001249 | 0.000000686  |
| 1  | -0.000001084 | -0.000001594 | 0.00000037   |
| 1  | -0.000001024 | -0.00000089  | -0.000000021 |
| 1  | -0.000001123 | -0.000000772 | -0.000000039 |
| 1  | -0.00000142  | -0.000000732 | -0.000000596 |
| 1  | -0.000001382 | -0.000001297 | -0.000000023 |
| 6  | -0.000000134 | 0.000001194  | -0.000002037 |
| 6  | -0.000000789 | 0.000001658  | -0.000002211 |
| 6  | -0.000000259 | 0.000002228  | -0.000001964 |
| 6  | 0.000000113  | 0.000001789  | -0.000001586 |
| 6  | -0.000000214 | 0.000001579  | -0.000001389 |
| 1  | -0.000000021 | 0.000002542  | -0.000002294 |
| 1  | -0.000001849 | 0.000000756  | -0.000001323 |
| 7  | -0.000001419 | 0.00000163   | -0.000001493 |
| 8  | 0.000000385  | -0.000000769 | -0.000001074 |
| 1  | 0.000000487  | 0.000002445  | -0.000001658 |
| 1  | -0.000001001 | 0.000001765  | -0.000002353 |
| 17 | 0.000000636  | 0.000001666  | -0.000000828 |

|                                              |                             |
|----------------------------------------------|-----------------------------|
| Zero-point correction=                       | 1.206909 (Hartree/Particle) |
| Thermal correction to Energy=                | 1.283576                    |
| Thermal correction to Enthalpy=              | 1.284520                    |
| Thermal correction to Gibbs Free Energy=     | 1.084321                    |
| Sum of electronic and zero-point Energies=   | -4388.030737                |
| Sum of electronic and thermal Energies=      | -4387.954070                |
| Sum of electronic and thermal Enthalpies=    | -4387.953126                |
| Sum of electronic and thermal Free Energies= | -4388.153324                |

#### D-2b

|    |              |              |              |
|----|--------------|--------------|--------------|
| 6  | -0.000009947 | -0.000021613 | 0.000001771  |
| 6  | 0.00000736   | 0.000007119  | 0.000002814  |
| 7  | 0.000010545  | -0.000000669 | -0.000003905 |
| 7  | -0.000005521 | 0.000014771  | 0.000001279  |
| 16 | -0.00001015  | -0.000003484 | -0.000004425 |
| 8  | -0.00000032  | 0.000006045  | 0.000002685  |
| 8  | -0.000000273 | 0.000004759  | 0.000001335  |
| 6  | -0.000002101 | 0.000001749  | -0.000004789 |
| 6  | -0.000004327 | 0.000002905  | 0.000002261  |
| 6  | -0.000004988 | -0.000007977 | -0.000003013 |



|   |              |              |              |
|---|--------------|--------------|--------------|
| 6 | -0.000002801 | 0.000002394  | -0.000008174 |
| 6 | -0.000005943 | 0.000001517  | 0.00000274   |
| 6 | 0.000001505  | -0.000004047 | 0.000000704  |
| 1 | -0.000002148 | -0.00000058  | -0.000000863 |
| 1 | -0.00000461  | -0.000001579 | -0.000002312 |
| 1 | -0.000004286 | -0.000001837 | -0.000002476 |
| 1 | -0.000003652 | -0.000001192 | -0.000001542 |
| 6 | -0.0000036   | -0.000000874 | -0.000003395 |
| 1 | -0.000007041 | -0.000002906 | -0.000004895 |
| 1 | -0.000003829 | -0.000000446 | -0.00000181  |
| 1 | -0.000006099 | -0.000005114 | -0.000000278 |
| 6 | -0.000005851 | 0.000001059  | -0.000002166 |
| 1 | -0.000000977 | -0.000003045 | -0.000001341 |
| 1 | -0.000001687 | -0.000003274 | 0.000000642  |
| 6 | 0.000001651  | -0.000001161 | -0.00000166  |
| 1 | 0.000002766  | -0.000000348 | 0.000002097  |
| 1 | 0.000000522  | -0.000000809 | -0.000000237 |
| 8 | -0.000001682 | -0.000001129 | -0.000001489 |
| 6 | 0.000005083  | -0.000003898 | 0.000002948  |
| 6 | -0.000001039 | -0.000003597 | -0.000003905 |
| 6 | -0.000004334 | 0.000000907  | -0.000000082 |
| 6 | -0.000002827 | -0.000001421 | 0.000000899  |
| 1 | -0.000000048 | -0.000002106 | -0.000001431 |
| 6 | -0.000000865 | -0.00000131  | -0.000002919 |
| 1 | -0.000000325 | -0.000000763 | 0.000000738  |
| 6 | 0.000002589  | -0.00000052  | 0.000000631  |
| 1 | 0.000000377  | -0.000002288 | -0.000001323 |
| 1 | -0.00000035  | 0.000000739  | 0.000000406  |
| 1 | 0.000000148  | -0.00000134  | -0.000000432 |
| 6 | 0.00000241   | -0.000000808 | -0.000000105 |
| 6 | -0.00000038  | -0.000001843 | -0.000000389 |
| 6 | 0.000001133  | -0.000001771 | -0.000001345 |
| 6 | 0.000003679  | -0.000002016 | -0.000001275 |
| 1 | 0.000002938  | -0.00000151  | 0.000000221  |
| 6 | -0.000000966 | -0.000002605 | -0.000000671 |
| 1 | -0.000000141 | -0.000000745 | -0.00000073  |
| 6 | 0.000001667  | -0.000001848 | 0.00000024   |
| 1 | 0.000002567  | -0.000002803 | 0.00000024   |
| 1 | 0.000000361  | -0.00000203  | -0.000001022 |
| 1 | 0.000001584  | -0.00000302  | -0.000000755 |
| 8 | -0.000001039 | -0.000000927 | -0.000002808 |
| 8 | -0.000005844 | -0.000006064 | -0.000001065 |
| 6 | 0.000003823  | -0.000001648 | 0.000004458  |
| 6 | 0.000001336  | -0.000002877 | -0.000001828 |

|    |              |              |              |
|----|--------------|--------------|--------------|
| 1  | 0.000003553  | -0.000000719 | 0.000000179  |
| 1  | 0.000002814  | -0.000001593 | -0.000000046 |
| 1  | 0.000003041  | -0.000002507 | 0.000000151  |
| 6  | 0.000004679  | -0.000002417 | -0.000000719 |
| 1  | 0.000003398  | -0.000001216 | 0.000000067  |
| 1  | 0.000003388  | -0.000002461 | 0.000000747  |
| 1  | 0.000002562  | -0.00000134  | 0.000000613  |
| 15 | 0.000013412  | -0.000003389 | 0.000000965  |
| 6  | -0.000000481 | 0.000000944  | -0.000000372 |
| 1  | 0.000003184  | 0.000000201  | 0.000000733  |
| 1  | 0.000003003  | -0.000001121 | 0.000000546  |
| 6  | 0.000003833  | -0.000004763 | -0.000003361 |
| 1  | 0.000001073  | -0.000001466 | 0.000001079  |
| 1  | 0.000002355  | -0.000003064 | 0.000000199  |
| 79 | -0.000000866 | 0.000000545  | -0.000001295 |
| 6  | 0.000000562  | 0.000007895  | 0.000000739  |
| 6  | 0.000000626  | -0.000005608 | -0.000007691 |
| 6  | -0.000002012 | 0.000008234  | 0.000011326  |
| 1  | -0.000000214 | 0.000004689  | 0.000002367  |
| 1  | 0.000001694  | 0.00000058   | -0.000000169 |
| 7  | 0.00000098   | 0.00000433   | 0.000007857  |
| 7  | -0.000000204 | -0.00000374  | -0.000006559 |
| 6  | 0.000000071  | 0.000001348  | -0.000001907 |
| 6  | 0.000004014  | 0.000004503  | 0.000001445  |
| 6  | -0.000001702 | 0.00000082   | 0.000002889  |
| 6  | 0.000001403  | 0.000001202  | 0.000002744  |
| 6  | 0.000001328  | 0.000003011  | 0.000000342  |
| 6  | 0.00000199   | -0.000001559 | -0.000000393 |
| 1  | 0.000003238  | 0.000000261  | 0.000000605  |
| 1  | 0.00000035   | 0.000000483  | 0.000000264  |
| 1  | 0.000001678  | 0.000000949  | 0.000001191  |
| 6  | -0.000004934 | -0.000002055 | -0.00000311  |
| 6  | 0.000001014  | 0.000009912  | -0.00000004  |
| 6  | -0.000000785 | 0.000001335  | 0.000005888  |
| 6  | -0.000003902 | 0.000000091  | 0.000003784  |
| 6  | 0.000000401  | 0.000006133  | -0.000000763 |
| 6  | -0.000001913 | -0.000000454 | -0.000002845 |
| 1  | -0.000003536 | 0.000002286  | -0.000000316 |
| 1  | -0.000000131 | 0.000001519  | 0.000000033  |
| 1  | -0.000001508 | 0.000002536  | 0.000000781  |
| 6  | -0.000005258 | 0.000001902  | -0.000000669 |
| 6  | 0.000000312  | 0.000003825  | 0.000001354  |
| 6  | -0.000002307 | 0.000002364  | 0.000000018  |
| 1  | -0.000002925 | 0.000002355  | 0.000000037  |

|   |              |              |              |
|---|--------------|--------------|--------------|
| 1 | -0.000002281 | 0.000005077  | 0.000001699  |
| 1 | -0.000002767 | 0.000003561  | 0.000000876  |
| 1 | -0.000003113 | 0.000004518  | 0.000000053  |
| 1 | -0.000002114 | 0.000000633  | -0.000001801 |
| 1 | -0.000003456 | 0.000002416  | 0.000000163  |
| 1 | -0.000002636 | 0.000002185  | -0.000000065 |
| 6 | 0.000006468  | 0.000001166  | 0.000001842  |
| 6 | -0.000001719 | 0.000002157  | 0.000000998  |
| 6 | -0.000002031 | 0.000003084  | 0.000001168  |
| 1 | 0.000002586  | 0.000001226  | 0.000001458  |
| 1 | 0.000000097  | 0.000001061  | 0.000000545  |
| 1 | 0.000001804  | 0.000001308  | 0.000001735  |
| 1 | 0.000002073  | 0.000003233  | 0.00000107   |
| 1 | 0.000000424  | 0.000003702  | 0.00000023   |
| 1 | 0.000002151  | 0.000001333  | 0.000001444  |
| 1 | 0.000001593  | 0.000002928  | 0.000001443  |
| 6 | -0.000003255 | 0.000002996  | -0.000001927 |
| 6 | 0.000000521  | -0.000000429 | 0.000002006  |
| 6 | -0.000000047 | 0.00000229   | 0.000003156  |
| 1 | -0.000002218 | 0.000003334  | 0.000001201  |
| 1 | -0.000001106 | 0.000000655  | -0.000002226 |
| 1 | -0.000001936 | 0.000001823  | 0.000000081  |
| 1 | -0.000001298 | 0.000003037  | -0.000000514 |
| 1 | -0.00000103  | 0.000003192  | 0.000000441  |
| 1 | -0.000001065 | 0.000001689  | -0.000000225 |
| 1 | -0.00000127  | 0.000002977  | 0.000000747  |
| 6 | 0.000004573  | 0.00000124   | 0.000003549  |
| 6 | 0.000002788  | 0.000003913  | 0.000001259  |
| 6 | 0.00000231   | 0.000001048  | 0.000000207  |
| 1 | 0.00000224   | 0.000001218  | 0.000001867  |
| 1 | 0.000002555  | 0.000004515  | 0.000003824  |
| 1 | 0.000002426  | 0.000002545  | 0.000002208  |
| 1 | 0.000003026  | 0.000002685  | 0.000002411  |
| 1 | 0.000002542  | -0.000000496 | 0.000001583  |
| 1 | 0.000002195  | 0.000001601  | 0.000001718  |
| 1 | 0.000003113  | 0.000000815  | 0.000001723  |
| 6 | 0.000000662  | -0.000000284 | 0.000001052  |
| 6 | 0.000000447  | -0.000004381 | 0.000000594  |
| 6 | 0.000000196  | -0.000004303 | -0.000001789 |
| 6 | -0.00000152  | -0.000002251 | -0.000001173 |
| 6 | -0.000002861 | -0.000003134 | 0.000000055  |
| 1 | 0.000000258  | -0.00000411  | -0.000002002 |
| 1 | 0.000000844  | -0.00000305  | -0.000001484 |
| 7 | 0.000009738  | -0.000003817 | -0.000005177 |

|                                              |              |              |                             |
|----------------------------------------------|--------------|--------------|-----------------------------|
| 8                                            | -0.000001625 | -0.000010477 | -0.000002526                |
| 1                                            | -0.000001011 | -0.000003548 | -0.000002111                |
| 1                                            | 0.000002146  | -0.000003968 | -0.000000794                |
| 17                                           | -0.00000162  | -0.000003818 | -0.000001813                |
| Zero-point correction=                       |              |              | 1.209009 (Hartree/Particle) |
| Thermal correction to Energy=                |              |              | 1.285232                    |
| Thermal correction to Enthalpy=              |              |              | 1.286177                    |
| Thermal correction to Gibbs Free Energy=     |              |              | 1.088554                    |
| Sum of electronic and zero-point Energies=   |              |              | -4388.038197                |
| Sum of electronic and thermal Energies=      |              |              | -4387.961973                |
| Sum of electronic and thermal Enthalpies=    |              |              | -4387.961029                |
| Sum of electronic and thermal Free Energies= |              |              | -4388.158652                |

Re6

|    |              |              |              |
|----|--------------|--------------|--------------|
| 6  | 0.000001087  | -0.000000606 | 0.000000003  |
| 6  | 0.000002498  | 0.000000111  | -0.000002324 |
| 7  | -0.000001771 | -0.000000158 | -0.00000005  |
| 7  | -0.000001414 | 0.000002668  | 0.000003046  |
| 16 | 0.00000075   | -0.000000879 | -0.000003635 |
| 8  | -0.000000774 | 0.000001247  | -0.000000924 |
| 8  | -0.00000001  | 0.000000161  | 0.000000398  |
| 6  | 0.000000827  | 0.000001058  | -0.000002776 |
| 6  | -0.000001317 | 0.000001076  | 0.000002788  |
| 6  | -0.000003621 | -0.000002671 | -0.000003892 |
| 6  | -0.000000463 | 0.000000812  | -0.000001819 |
| 6  | -0.000000295 | 0.000000896  | 0.000004143  |
| 6  | -0.000003604 | -0.000002397 | -0.000003131 |
| 1  | -0.000001152 | -0.000000176 | -0.000002205 |
| 1  | -0.000001554 | 0.000000439  | -0.000000944 |
| 1  | -0.000001012 | -0.000000097 | -0.000001193 |
| 1  | 0.000000027  | 0.000000558  | -0.000000128 |
| 6  | -0.000002829 | -0.000000919 | 0.000001069  |
| 1  | -0.000000909 | 0.000000082  | -0.000000893 |
| 1  | -0.000002045 | -0.000000443 | -0.000000892 |
| 1  | -0.000001627 | 0.000000246  | -0.000000897 |
| 6  | 0.000000449  | 0.000000686  | -0.000001435 |
| 1  | -0.000000186 | -0.000000061 | -0.000001205 |
| 1  | -0.000000399 | -0.000000189 | -0.00000158  |
| 16 | 0.000001021  | 0.000000363  | -0.000001033 |
| 8  | 0.000000181  | -0.000000875 | -0.000000062 |
| 8  | -0.000000667 | -0.000001068 | 0.000002312  |
| 6  | 0.000001653  | -0.00000002  | -0.000000096 |
| 6  | 0.000000324  | -0.000000427 | 0.00000151   |
| 6  | -0.000001193 | 0.000001709  | 0.000002581  |

|   |              |              |              |
|---|--------------|--------------|--------------|
| 6 | -0.000001825 | 0.000000733  | 0.000001481  |
| 1 | -0.000000381 | -0.000000109 | 0.000000307  |
| 6 | 0.000000273  | -0.000001388 | 0.000002459  |
| 1 | 0.000000087  | -0.000000326 | 0.000001413  |
| 6 | 0.000000606  | -0.000000573 | -0.000001202 |
| 1 | -0.000000554 | -0.000000441 | 0.000000925  |
| 1 | 0.000000252  | 0.000000047  | 0.000001755  |
| 6 | -0.000000299 | -0.000000126 | 0.000002463  |
| 1 | -0.000000364 | -0.000000117 | 0.00000182   |
| 1 | -0.000000482 | -0.000000419 | 0.000002124  |
| 1 | -0.000000325 | -0.000000082 | 0.000001212  |
| 6 | 0.000002607  | -0.000001462 | -0.000001214 |
| 6 | 0.000001826  | 0.000000533  | 0.000000234  |
| 6 | 0.000000667  | 0.000000036  | 0.000000739  |
| 1 | 0.000000855  | 0.000000692  | 0.000000102  |
| 6 | 0.000002382  | 0.000000588  | -0.000000047 |
| 1 | 0.000001153  | 0.000000233  | 0.000000321  |
| 1 | 0.000001213  | -0.000000003 | -0.000000093 |
| 6 | 0.000001697  | -0.000000154 | 0.000000665  |
| 1 | 0.000001346  | 0.000000229  | 0.000000717  |
| 1 | 0.000000098  | 0.000000171  | 0.000000404  |
| 6 | 0.00000184   | 0.000000286  | 0.000000688  |
| 1 | 0.000001947  | 0.000000227  | -0.000000153 |
| 1 | 0.000001794  | 0.000000192  | -0.000000323 |
| 1 | 0.000002348  | 0.000000554  | 0.000000911  |
| 1 | 0.000002082  | 0.000000277  | 0.000000126  |
| 1 | 0.000002634  | 0.000000214  | 0.000000282  |
| 1 | 0.00000225   | 0.000000118  | 0.000000784  |
| 6 | -0.000000241 | 0.000001796  | -0.000000091 |
| 6 | -0.000000475 | -0.000000955 | -0.000000741 |
| 6 | -0.00000125  | -0.000000298 | -0.000001072 |
| 6 | -0.000001105 | -0.000000237 | -0.000000054 |
| 1 | -0.000000206 | 0.000000035  | -0.000000877 |
| 6 | -0.000000848 | -0.000000594 | -0.000000097 |
| 1 | -0.000000798 | -0.000000002 | -0.000000905 |
| 6 | -0.000001019 | -0.000000144 | -0.000000032 |
| 1 | -0.000000691 | -0.000000007 | -0.000000304 |
| 1 | -0.000001516 | -0.000000178 | -0.000000108 |
| 1 | -0.000001461 | -0.000000185 | 0.000000014  |

Zero-point correction=

0.559901 (Hartree/Particle)

Thermal correction to Energy=

0.596038

Thermal correction to Enthalpy=

0.596982

Thermal correction to Gibbs Free Energy=

0.484477

Sum of electronic and zero-point Energies=

-2330.431474

|                                              |              |
|----------------------------------------------|--------------|
| Sum of electronic and thermal Energies=      | -2330.395337 |
| Sum of electronic and thermal Enthalpies=    | -2330.394393 |
| Sum of electronic and thermal Free Energies= | -2330.506898 |

E-1

|    |              |              |              |
|----|--------------|--------------|--------------|
| 6  | -0.000009192 | -0.0000083   | 0.000005906  |
| 6  | 0.000017358  | 0.0000069    | -0.000006068 |
| 7  | 0.000004742  | 0.000012683  | -0.000004761 |
| 7  | -0.000005821 | -0.000006029 | 0.000011936  |
| 16 | -0.000010479 | -0.00000839  | 0.000007496  |
| 8  | 0.000000741  | -0.000000036 | 0.000000887  |
| 8  | 0.000002732  | -0.00000004  | -0.000000948 |
| 6  | -0.000002832 | 0.000000569  | -0.000002476 |
| 6  | 0.000001361  | -0.000003052 | 0.000000832  |
| 6  | 0.000000019  | -0.000001587 | -0.00000296  |
| 6  | -0.000004098 | -0.00000234  | 0.000003027  |
| 6  | -0.00000331  | -0.000002753 | -0.000000686 |
| 6  | 0.000000258  | -0.000001033 | -0.000001283 |
| 1  | -0.000000769 | -0.000000872 | -0.000000811 |
| 1  | -0.00000028  | -0.000001289 | -0.000000833 |
| 1  | -0.000000916 | -0.00000181  | -0.000000464 |
| 1  | -0.000001351 | -0.000001613 | -0.000000199 |
| 6  | 0.000005793  | 0.000002877  | -0.000003842 |
| 1  | -0.00000449  | -0.000003546 | -0.000000802 |
| 1  | -0.00000396  | -0.00000401  | 0.00000006   |
| 1  | -0.000003165 | -0.000003405 | -0.000000125 |
| 6  | -0.000004607 | -0.0000123   | -0.000001262 |
| 1  | -0.000001315 | 0.000001311  | 0.000000061  |
| 1  | -0.000003833 | 0.000000092  | 0.000000799  |
| 16 | 0.000001339  | 0.000004961  | -0.000007081 |
| 8  | -0.000003071 | -0.000000544 | 0.000002546  |
| 8  | 0.00000177   | 0.000000646  | 0.000000383  |
| 6  | -0.000003585 | 0.000002182  | 0.000004006  |
| 6  | 0.000003053  | -0.000001366 | 0.00000135   |
| 6  | 0.00000367   | 0.000001334  | 0.000001238  |
| 6  | 0.000000351  | 0.000001627  | 0.000002117  |
| 1  | -0.000001192 | -0.000000142 | 0.000001049  |
| 6  | -0.000000089 | -0.000000669 | 0.000001868  |
| 1  | -0.000000247 | 0.000001481  | 0.000001662  |
| 6  | -0.00000344  | 0.000002808  | 0.000002827  |
| 1  | 0.000000154  | -0.000000289 | 0.000002474  |
| 1  | 0.000000666  | 0.000001184  | 0.000002994  |
| 6  | 0.000002132  | -0.000001888 | 0.000007881  |
| 1  | -0.000000398 | 0.000001302  | 0.000002524  |
| 1  | -0.000000115 | 0.000000624  | 0.000001123  |

|    |              |               |              |
|----|--------------|---------------|--------------|
| 1  | -0.000001654 | 0.000000977   | 0.000001969  |
| 6  | 0.000001847  | 0.000001525   | 0.000000398  |
| 6  | -0.000000259 | -0.000000403  | 0.000000401  |
| 6  | -0.000001091 | -0.000000357  | 0.000001877  |
| 1  | -0.000000005 | 0.000000083   | 0.000000446  |
| 6  | -0.000000166 | -0.000000186  | 0.000000891  |
| 1  | 0.000000626  | 0.000000721   | 0.000001277  |
| 1  | 0.000000722  | 0.000000915   | 0.000000724  |
| 6  | 0.000000458  | -0.000000715  | 0.000002182  |
| 1  | 0.000000026  | 0.000000675   | 0.000001824  |
| 1  | -0.000000876 | 0.000000494   | 0.000001901  |
| 6  | -0.000001068 | 0.000000968   | 0.000001899  |
| 1  | 0.000000417  | 0.000000753   | 0.000000886  |
| 1  | -0.000000096 | -0.000000014  | 0.000000809  |
| 1  | -0.000000299 | 0.000000444   | 0.000002068  |
| 1  | -0.000000402 | -0.000000008  | 0.000001761  |
| 1  | -0.000000027 | 0.000000262   | 0.000001446  |
| 1  | 0.000000194  | 0.000000877   | 0.000001435  |
| 6  | 0.000005869  | 0.00000528    | 0.000003263  |
| 6  | -0.000000654 | -0.000003981  | 0.000001455  |
| 6  | -0.000000244 | 0.000000991   | 0.000000551  |
| 6  | 0.000000306  | 0.000001923   | -0.000000182 |
| 1  | -0.000000395 | -0.000000069  | 0.000000013  |
| 6  | -0.000000819 | -0.000000162  | 0.000003828  |
| 1  | -0.000000016 | -0.0000001432 | 0.000000151  |
| 6  | -0.000003096 | -0.000000202  | 0.000000621  |
| 1  | -0.000000536 | -0.000000488  | 0.000001397  |
| 1  | -0.000001252 | -0.000000292  | 0.000001619  |
| 1  | -0.000000246 | 0.000000121   | 0.000002341  |
| 79 | 0.000002188  | 0.000002536   | 0.000000433  |
| 6  | 0.000001488  | -0.000002851  | -0.000000468 |
| 6  | -0.000002691 | -0.000000299  | -0.000003307 |
| 6  | 0.000002629  | 0.000000082   | -0.000001182 |
| 1  | 0.000000463  | 0.000000029   | -0.000000962 |
| 1  | 0.000001449  | 0.000001036   | -0.000000046 |
| 7  | -0.000001942 | 0.000004655   | 0.000001174  |
| 7  | -0.000001479 | 0.000000428   | -0.000002642 |
| 6  | 0.000002873  | -0.000003388  | -0.000000456 |
| 6  | 0.00000003   | 0.000003363   | 0.000000877  |
| 6  | 0.000000168  | 0.000003115   | -0.000001202 |
| 6  | 0.000000149  | 0.000001378   | 0.00000001   |
| 6  | 0.000000135  | -0.000000066  | -0.000000099 |
| 6  | 0.000000483  | -0.000000681  | -0.000000225 |
| 1  | 0.000001036  | 0.000000844   | 0.000000037  |

|   |              |              |              |
|---|--------------|--------------|--------------|
| 1 | -0.000000153 | -0.000000019 | -0.000000597 |
| 1 | 0.000000514  | 0.000001203  | 0.000000039  |
| 6 | 0.00000113   | -0.000002422 | -0.000001155 |
| 6 | 0.000000624  | 0.000001105  | -0.000001654 |
| 6 | -0.00000041  | 0.000001347  | -0.000001721 |
| 6 | 0.000000881  | -0.000000327 | -0.000001834 |
| 6 | -0.000001291 | 0.000000456  | -0.000001035 |
| 6 | 0.000000541  | -0.000001037 | -0.000002027 |
| 1 | 0.00000026   | -0.00000094  | -0.000001895 |
| 1 | 0.00000009   | -0.000000042 | -0.000001159 |
| 1 | 0.000000158  | -0.000000339 | -0.000001278 |
| 6 | -0.000000207 | -0.000002494 | -0.00000106  |
| 6 | 0.000000407  | 0.000000955  | -0.000003421 |
| 6 | -0.000000072 | -0.000000376 | -0.000002945 |
| 1 | -0.000000274 | -0.000001132 | -0.000002277 |
| 1 | 0.000000734  | 0.000000065  | -0.000002761 |
| 1 | 0.00000003   | -0.000000565 | -0.000002021 |
| 1 | 0.000000437  | -0.000001008 | -0.000002811 |
| 1 | -0.000001046 | -0.000002288 | -0.000001827 |
| 1 | -0.000001003 | -0.000000789 | -0.000002223 |
| 1 | -0.000000017 | -0.000000868 | -0.000001779 |
| 6 | 0.000000718  | 0.000003086  | -0.00000064  |
| 6 | 0.000001601  | -0.000001192 | -0.000000803 |
| 6 | 0.000001916  | 0.000001151  | -0.000000678 |
| 1 | -0.000000106 | -0.000000044 | -0.000001392 |
| 1 | 0.000000091  | 0.00000023   | -0.000000529 |
| 1 | 0.000000559  | 0.000000717  | 0.000000177  |
| 1 | 0.00000023   | 0.000000555  | -0.000000621 |
| 1 | 0.000001192  | 0.000001     | -0.000001385 |
| 1 | 0.000000852  | 0.000000889  | -0.000001306 |
| 1 | 0.000001125  | 0.000001696  | -0.000001301 |
| 6 | -0.000000253 | -0.000004126 | -0.000003669 |
| 6 | -0.000000682 | 0.000001164  | 0.000002629  |
| 6 | 0.000000301  | 0.000002785  | -0.000001475 |
| 1 | 0.000000543  | -0.000000331 | -0.000001988 |
| 1 | -0.000000701 | -0.000001326 | -0.000000472 |
| 1 | 0.000000059  | -0.000000543 | -0.000001436 |
| 1 | -0.000000434 | -0.000000778 | -0.000002149 |
| 1 | 0.000000254  | -0.00000035  | -0.000001812 |
| 1 | 0.00000037   | -0.000000855 | -0.000000987 |
| 1 | 0.000000298  | -0.000000084 | -0.000001582 |
| 6 | 0.000002917  | -0.000000053 | -0.000002122 |
| 6 | 0.000001957  | 0.000001977  | 0.000000887  |
| 6 | 0.000001736  | 0.00000205   | -0.000000703 |



|                                              |              |             |                             |
|----------------------------------------------|--------------|-------------|-----------------------------|
| 1                                            | 0.000001189  | 0.000002309 | 0.000000115                 |
| 1                                            | 0.000001547  | 0.000001833 | -0.000001794                |
| 1                                            | 0.000001262  | 0.000001638 | -0.000000946                |
| 1                                            | 0.000001535  | 0.000001532 | -0.000000438                |
| 1                                            | -0.000000732 | 0.000000853 | 0.000000032                 |
| 1                                            | 0.000000159  | 0.000001641 | -0.000000069                |
| 1                                            | 0.000001119  | 0.000001883 | -0.000000004                |
| Zero-point correction=                       |              |             | 1.134300 (Hartree/Particle) |
| Thermal correction to Energy=                |              |             | 1.204312                    |
| Thermal correction to Enthalpy=              |              |             | 1.205256                    |
| Thermal correction to Gibbs Free Energy=     |              |             | 1.017996                    |
| Sum of electronic and zero-point Energies=   |              |             | -3625.279058                |
| Sum of electronic and thermal Energies=      |              |             | -3625.209046                |
| Sum of electronic and thermal Enthalpies=    |              |             | -3625.208102                |
| Sum of electronic and thermal Free Energies= |              |             | -3625.395362                |

E-2

|    |              |              |              |
|----|--------------|--------------|--------------|
| 6  | 0.000002393  | 0.000006976  | -0.00000191  |
| 6  | 0.000007172  | -0.000002558 | -0.000000022 |
| 7  | -0.000002371 | -0.000017177 | 0.000000972  |
| 7  | -0.000009601 | 0.000004784  | 0.000012455  |
| 16 | 0.00000301   | 0.000007494  | -0.00000421  |
| 8  | 0.000000192  | 0.000001703  | 0.000001444  |
| 8  | -0.000002707 | -0.000000395 | -0.000000664 |
| 6  | -0.000001013 | -0.000001347 | 0.000002119  |
| 6  | -0.000000609 | 0.000000349  | -0.00000173  |
| 6  | -0.000001561 | 0.000000364  | 0.000002411  |
| 6  | -0.00000112  | 0.000000195  | -0.000000339 |
| 6  | -0.00000123  | 0.000000681  | -0.000000429 |
| 6  | -0.000001109 | 0.000001503  | -0.000000606 |
| 1  | -0.000001172 | 0.000000142  | 0.000000882  |
| 1  | -0.000001341 | 0.000000619  | 0.000000081  |
| 1  | -0.000001417 | -0.000000099 | -0.000000387 |
| 1  | -0.000000738 | -0.000000653 | -0.000000256 |
| 6  | -0.00000192  | -0.000000165 | 0.000000272  |
| 1  | -0.000001305 | 0.000001054  | -0.000000034 |
| 1  | -0.000002074 | 0.000001274  | -0.000000114 |
| 1  | -0.000001656 | 0.000000338  | -0.000000115 |
| 6  | 0.000000658  | 0.000007682  | 0.000002033  |
| 1  | -0.000000659 | -0.000001132 | -0.000000447 |
| 1  | -0.000000963 | 0.000000098  | -0.000000607 |
| 16 | 0.000004307  | -0.000005219 | -0.000006072 |
| 8  | 0.000003134  | 0.000004549  | 0.000002297  |
| 8  | -0.000002435 | 0.000001017  | 0.000001133  |

|    |              |              |              |
|----|--------------|--------------|--------------|
| 6  | 0.000002633  | 0.000001881  | 0.000000503  |
| 6  | -0.000001103 | -0.000001725 | 0.000000606  |
| 6  | -0.000001891 | 0.000000363  | 0.000000783  |
| 6  | 0.000000649  | 0.000000803  | -0.00000009  |
| 1  | 0.00000017   | 0.000000839  | -0.000000524 |
| 6  | 0.000000214  | 0.00000083   | 0.000001194  |
| 1  | -0.000000064 | 0.00000091   | 0.000000266  |
| 6  | -0.000001241 | -0.000000048 | 0.000000109  |
| 1  | -0.000000553 | -0.000000354 | -0.000000074 |
| 1  | -0.000000487 | 0.000000745  | 0.000000561  |
| 6  | 0.000000347  | 0.000000169  | -0.000000198 |
| 1  | -0.000000401 | 0.000000205  | -0.000000012 |
| 1  | -0.000000781 | 0.000000204  | 0.000000212  |
| 1  | -0.000000558 | 0.000000371  | 0.000000272  |
| 6  | -0.000002418 | -0.000000942 | -0.000006169 |
| 6  | -0.000001009 | 0.000001126  | 0.000001804  |
| 6  | -0.000000374 | 0.000000741  | 0.000001682  |
| 1  | -0.000001987 | 0.000001105  | 0.000000489  |
| 6  | -0.00000107  | 0.00000123   | -0.000000156 |
| 1  | 0.000000037  | 0.000000583  | -0.000000182 |
| 1  | -0.000000009 | 0.00000126   | -0.000000169 |
| 6  | -0.000002228 | 0.000000642  | -0.000000708 |
| 1  | -0.000000527 | 0.00000036   | 0.000000339  |
| 1  | -0.000000862 | 0.000000653  | 0.000000207  |
| 6  | -0.000000883 | 0.000000321  | 0.000001386  |
| 1  | -0.000000737 | 0.000001926  | 0.00000129   |
| 1  | -0.000000953 | 0.000000127  | 0.000000127  |
| 1  | -0.000001074 | 0.000000771  | 0.000000518  |
| 1  | -0.000001152 | 0.000000474  | 0.000000212  |
| 1  | -0.000001611 | 0.000001593  | 0.000000424  |
| 1  | -0.000001133 | 0.000001098  | 0.000000745  |
| 6  | -0.000000463 | -0.000001726 | -0.000000629 |
| 6  | -0.000000988 | 0.000000892  | -0.000000959 |
| 6  | -0.000000932 | -0.000000249 | -0.000000888 |
| 6  | -0.00000179  | 0.000000439  | -0.000001174 |
| 1  | -0.000001521 | 0.000000097  | -0.000000158 |
| 6  | -0.000001922 | -0.00000106  | -0.000000659 |
| 1  | -0.000000689 | -0.000000679 | -0.000000718 |
| 6  | -0.000001229 | -0.000000338 | 0.000000673  |
| 1  | -0.000001566 | -0.000000246 | -0.000000356 |
| 1  | -0.000001081 | -0.000000162 | -0.000000021 |
| 1  | -0.000001721 | -0.000000296 | -0.000001095 |
| 79 | 0.000000028  | -0.000004022 | -0.000001591 |
| 6  | -0.000008948 | 0.00000162   | 0.000001424  |

|   |             |             |             |
|---|-------------|-------------|-------------|
| 6 | 0.00000834  | 0.00001917  | -0.00002836 |
| 6 | -0.00000695 | -0.00003264 | 0.00001287  |
| 1 | 0.00001474  | -0.00001459 | -0.00000026 |
| 1 | 0.00001481  | -0.00000141 | -0.00000568 |
| 7 | 0.00006947  | 0.00000433  | 0.00000813  |
| 7 | 0.00006862  | -0.00000543 | 0.00001855  |
| 6 | 0.00000881  | 0.00000046  | -0.00001466 |
| 6 | -0.00001597 | 0.00001624  | 0.00001095  |
| 6 | 0.00003091  | -0.00002039 | 0.00002089  |
| 6 | 0.00003245  | -0.00000992 | 0.00001457  |
| 6 | -0.00002111 | -0.00000119 | 0.00001893  |
| 6 | 0.00001086  | 0.00002254  | -0.00001207 |
| 1 | 0.00001591  | -0.00000154 | 0.00000096  |
| 1 | 0.00002208  | 0.00000053  | 0.0000009   |
| 1 | 0.0000146   | 0.00000731  | 0.00001415  |
| 6 | -0.0000071  | 0.00001862  | -0.00000761 |
| 6 | 0.00001058  | -0.00000977 | 0.00000691  |
| 6 | 0.00001253  | -0.00002933 | -0.00000382 |
| 6 | 0.0000033   | -0.00001463 | -0.00001775 |
| 6 | -0.00000177 | -0.00001326 | -0.00001701 |
| 6 | 0.00000154  | -0.00000317 | -0.00001513 |
| 1 | 0.00000166  | -0.00000741 | -0.00000088 |
| 1 | 0.00000286  | -0.00000142 | -0.00001244 |
| 1 | -0.00000272 | -0.00001148 | -0.00001516 |
| 6 | -0.00002476 | -0.00002191 | -0.0000537  |
| 6 | 0.00003736  | 0.00000093  | 0.00000899  |
| 6 | 0.00000591  | -0.00000177 | 0.00002643  |
| 1 | 0.00000943  | -0.00000053 | -0.00000164 |
| 1 | 0.00000301  | -0.00001689 | -0.00000652 |
| 1 | 0.00001253  | -0.00000896 | -0.00000588 |
| 1 | 0.00000209  | -0.00001491 | -0.00001186 |
| 1 | -0.00000245 | -0.00000611 | -0.0000016  |
| 1 | 0.00000324  | -0.00001389 | -0.00000979 |
| 1 | 0.00000532  | -0.00000823 | -0.0000006  |
| 6 | -0.00000015 | -0.00001541 | -0.00001514 |
| 6 | 0.00001239  | -0.00000663 | 0.00000608  |
| 6 | 0.00000522  | 0.00000186  | -0.00000805 |
| 1 | -0.00000227 | -0.00000393 | -0.00001163 |
| 1 | 0.00000099  | -0.00000147 | -0.00000406 |
| 1 | 0.00000469  | -0.00000059 | -0.00000745 |
| 1 | -0.00001365 | -0.00001047 | -0.00000066 |
| 1 | 0.00001352  | -0.00001097 | -0.00000183 |
| 1 | 0.00000869  | -0.00001305 | -0.00001212 |
| 1 | 0.00000898  | -0.00000727 | -0.00000238 |

|   |             |              |              |
|---|-------------|--------------|--------------|
| 6 | 0.000000365 | 0.000000265  | 0.000000033  |
| 6 | 0.000000227 | 0.000000408  | 0.000001306  |
| 6 | 0.000001999 | 0.000000489  | -0.000000164 |
| 1 | 0.000001118 | 0.000000093  | 0.000000108  |
| 1 | 0.000000604 | -0.000000525 | 0.000000132  |
| 1 | 0.000000799 | -0.000000277 | 0.000000384  |
| 1 | 0.000000728 | 0.000000562  | 0.000000523  |
| 1 | 0.00000166  | -0.00000015  | 0.000000368  |
| 1 | 0.000001175 | -0.000000057 | 0.000000611  |
| 1 | 0.000001207 | -0.000000082 | 0.000000558  |
| 6 | 0.000002098 | -0.000000566 | 0.000000704  |
| 6 | 0.000001882 | -0.000000123 | 0.000000713  |
| 6 | 0.000000391 | -0.000000092 | 0.000000013  |
| 1 | 0.000000528 | -0.000000076 | 0.000000402  |
| 1 | 0.0000017   | -0.000000468 | 0.000000224  |
| 1 | 0.000001458 | -0.000000263 | 0.000000209  |
| 1 | 0.000001439 | -0.000000094 | 0.000000351  |
| 1 | 0.000000761 | 0.000000479  | 0.000000753  |
| 1 | 0.000000969 | 0.000000658  | 0.000000745  |
| 1 | 0.000001049 | 0.000000076  | 0.000000032  |

Zero-point correction= 1.134541 (Hartree/Particle)

Thermal correction to Energy= 1.204529

Thermal correction to Enthalpy= 1.205474

Thermal correction to Gibbs Free Energy= 1.017707

Sum of electronic and zero-point Energies= -3625.278676

Sum of electronic and thermal Energies= -3625.208688

Sum of electronic and thermal Enthalpies= -3625.207744

Sum of electronic and thermal Free Energies= -3625.395511

E-TS1a

|    |              |              |              |
|----|--------------|--------------|--------------|
| 6  | -0.000001696 | -0.000000243 | 0.000000953  |
| 6  | 0.000002127  | -0.000002315 | -0.000000357 |
| 7  | 0.00000006   | 0.000000228  | -0.000000555 |
| 7  | -0.000000119 | 0.000001353  | -0.000000291 |
| 16 | -0.000000181 | -0.000000026 | -0.000000207 |
| 8  | -0.000000003 | 0.000000127  | -0.000000017 |
| 8  | -0.000000197 | -0.000000142 | -0.000000008 |
| 6  | -0.00000053  | 0.000000648  | -0.000000352 |
| 6  | -0.00000015  | 0.00000052   | -0.000001383 |
| 6  | -0.00000007  | 0.000000141  | -0.000001998 |
| 6  | -0.000001373 | 0.000005448  | -0.000000226 |
| 6  | -0.000001415 | -0.00000041  | 0.000001073  |
| 6  | -0.000001218 | 0.000000099  | 0.000000606  |
| 1  | -0.000000059 | 0.000000368  | -0.000001032 |

|    |              |               |               |
|----|--------------|---------------|---------------|
| 1  | -0.000000642 | 0.000000117   | -0.000000788  |
| 1  | -0.000000874 | -0.000000059  | -0.000000268  |
| 1  | -0.000000459 | 0.000000224   | 0.000000001   |
| 6  | -0.000000989 | -0.0000003518 | -0.000000092  |
| 1  | -0.000000268 | 0.000000427   | -0.0000002623 |
| 1  | -0.000001705 | 0.000000077   | -0.000000374  |
| 1  | -0.000002003 | -0.000000187  | 0.000000234   |
| 6  | -0.000000217 | -0.000000059  | 0.000000079   |
| 1  | -0.000000287 | -0.000000189  | 0.000000445   |
| 1  | 0.000000026  | -0.000000272  | 0.000000426   |
| 16 | 0.000000254  | 0.000000191   | 0.000001485   |
| 8  | 0.000000528  | -0.000000006  | 0.000000655   |
| 8  | 0.000000304  | -0.000001025  | 0.000001405   |
| 6  | 0.000000026  | -0.000000085  | 0.000000776   |
| 6  | 0.000000044  | -0.000000678  | 0.000001021   |
| 6  | -0.000000138 | -0.000000307  | 0.000001483   |
| 6  | -0.000001262 | 0.000001053   | 0.000001801   |
| 1  | 0.000000298  | -0.000000286  | 0.000001048   |
| 6  | 0.000001549  | -0.000001471  | 0.000000599   |
| 1  | 0.000000214  | -0.000000465  | 0.000001621   |
| 6  | -0.000002126 | -0.000000368  | 0.000001606   |
| 1  | 0.000000615  | -0.000000252  | 0.00000165    |
| 1  | 0.000000518  | -0.000000411  | 0.000002152   |
| 6  | 0.000002136  | 0.000002774   | 0.00000038    |
| 1  | 0.000001379  | -0.000000426  | 0.000002621   |
| 1  | -0.000000723 | 0.000000605   | 0.000003066   |
| 1  | 0.00000222   | -0.000001446  | 0.000002173   |
| 6  | -0.000000886 | -0.000000723  | 0.000001155   |
| 6  | -0.00000024  | -0.000000299  | 0.000000776   |
| 6  | -0.000000184 | -0.000000011  | 0.000001171   |
| 1  | -0.000000776 | -0.000000213  | 0.000000537   |
| 6  | -0.000001076 | 0.000000103   | 0.000000829   |
| 1  | -0.000000189 | -0.000000137  | 0.000000663   |
| 1  | -0.000000322 | 0.00000002    | 0.000000697   |
| 6  | -0.000000823 | -0.000000079  | 0.000001224   |
| 1  | -0.000000343 | -0.000000401  | 0.000001523   |
| 1  | -0.000000707 | -0.000000188  | 0.00000104    |
| 6  | -0.000000669 | 0.000000027   | 0.000001586   |
| 1  | -0.000000769 | -0.000000134  | 0.000001329   |
| 1  | -0.000000922 | -0.000000052  | 0.000000964   |
| 1  | -0.000000786 | -0.000000104  | 0.000001402   |
| 1  | -0.000000936 | -0.000000002  | 0.000001154   |
| 1  | -0.000000992 | -0.000000011  | 0.000001515   |
| 1  | -0.000000753 | -0.000000015  | 0.000001506   |

|    |              |              |              |
|----|--------------|--------------|--------------|
| 6  | -0.00000067  | -0.00000055  | 0.00000049   |
| 6  | -0.000000851 | 0.000000203  | 0.000000151  |
| 6  | -0.000000405 | 0.000000011  | 0.000000783  |
| 6  | -0.000000961 | -0.000000164 | 0.000000737  |
| 1  | -0.000000439 | 0.000000216  | 0.000000428  |
| 6  | -0.000000853 | 0.000000087  | 0.000000393  |
| 1  | -0.000000402 | 0.000000055  | 0.000000758  |
| 6  | -0.00000104  | 0.000000013  | 0.000000539  |
| 1  | -0.000001219 | 0.000000185  | 0.000000491  |
| 1  | -0.000000922 | 0.000000082  | 0.000000081  |
| 1  | -0.000001311 | 0.000000013  | 0.000000664  |
| 79 | -0.000000105 | -0.000000355 | -0.00000106  |
| 6  | 0.000000275  | -0.000000162 | -0.000001049 |
| 6  | 0.000000678  | 0.000000109  | -0.000000977 |
| 6  | 0.000000864  | 0.000000014  | -0.000001057 |
| 1  | 0.000000099  | 0.000000147  | -0.000001242 |
| 1  | 0.000000634  | 0.000000012  | -0.000001171 |
| 7  | 0.000000237  | -0.000000172 | -0.000000487 |
| 7  | 0.000001141  | 0.000000418  | -0.000001339 |
| 6  | 0.000000578  | 0.000000957  | -0.000001065 |
| 6  | 0.000000426  | 0.000000099  | -0.000000376 |
| 6  | -0.000000594 | -0.000000177 | -0.000000766 |
| 6  | -0.000000056 | -0.000000151 | -0.000000658 |
| 6  | -0.000000273 | 0.000000465  | -0.000000273 |
| 6  | 0.000000004  | 0.000000299  | -0.000000734 |
| 1  | -0.000000066 | -0.000000079 | 0.000000001  |
| 1  | -0.000000496 | 0.000000303  | -0.000000071 |
| 1  | -0.000000326 | 0.000000123  | -0.000000337 |
| 6  | 0.000000378  | -0.000000033 | -0.000000586 |
| 6  | 0.000000895  | 0.000000087  | -0.000000928 |
| 6  | 0.000001252  | -0.000000187 | -0.000000503 |
| 6  | 0.000000071  | -0.000000001 | -0.000000857 |
| 6  | 0.000001136  | -0.000000176 | -0.000000084 |
| 6  | 0.000001022  | 0.000000016  | -0.000000765 |
| 1  | 0.000000646  | 0.000000015  | -0.000000974 |
| 1  | 0.00000133   | -0.000000292 | -0.000000518 |
| 1  | 0.000001117  | -0.000000083 | -0.000000675 |
| 6  | 0.000000135  | 0.000000209  | -0.000000944 |
| 6  | 0.000000613  | 0.000000266  | -0.000001507 |
| 6  | 0.000000232  | 0.000000019  | -0.000001368 |
| 1  | 0.000000221  | 0.000000021  | -0.000001055 |
| 1  | 0.000000788  | 0.000000148  | -0.000001602 |
| 1  | 0.000000447  | 0.000000309  | -0.000001624 |
| 1  | 0.000000575  | 0.000000028  | -0.000001512 |

|   |              |              |              |
|---|--------------|--------------|--------------|
| 1 | 0.00000019   | 0.000000192  | -0.000000853 |
| 1 | 0.000000381  | 0.000000133  | -0.000001417 |
| 1 | -0.000000117 | 0.000000273  | -0.000001457 |
| 6 | 0.000000864  | -0.00000004  | -0.000000439 |
| 6 | 0.000000763  | -0.000000216 | -0.000000176 |
| 6 | 0.000001305  | 0.000000074  | -0.000000329 |
| 1 | 0.000001306  | -0.000000182 | -0.000000019 |
| 1 | 0.000000667  | -0.000000248 | 0.000000395  |
| 1 | 0.000001136  | -0.000000251 | 0.000000065  |
| 1 | 0.000001296  | -0.000000211 | 0.000000052  |
| 1 | 0.000001308  | -0.000000187 | -0.000000655 |
| 1 | 0.00000162   | -0.00000008  | -0.000000414 |
| 1 | 0.000001476  | -0.000000168 | -0.000000285 |
| 6 | -0.000000383 | 0.000000324  | -0.000001007 |
| 6 | -0.000000565 | 0.000000333  | -0.000000998 |
| 6 | -0.000000279 | 0.000000213  | -0.000001414 |
| 1 | 0.000000132  | 0.000000165  | -0.000001158 |
| 1 | -0.000000435 | 0.00000029   | -0.000000785 |
| 1 | -0.000000624 | 0.00000038   | -0.000001071 |
| 1 | -0.000000639 | 0.000000318  | -0.000000807 |
| 1 | -0.000000026 | 0.000000344  | -0.00000138  |
| 1 | -0.000000299 | 0.000000328  | -0.000001235 |
| 1 | -0.000000313 | 0.000000344  | -0.00000158  |
| 6 | 0.000000255  | 0.000000121  | -0.000000201 |
| 6 | 0.000000841  | -0.00000016  | -0.000000509 |
| 6 | 0.000000626  | -0.000000049 | -0.000000031 |
| 1 | 0.000000716  | -0.000000173 | -0.000000249 |
| 1 | 0.000000894  | -0.000000051 | -0.000000738 |
| 1 | 0.000001056  | -0.00000008  | -0.000000367 |
| 1 | 0.000000672  | -0.00000013  | -0.000000366 |
| 1 | 0.000000248  | -0.000000346 | 0.000000026  |
| 1 | 0.000000453  | -0.000000145 | -0.000000093 |
| 1 | 0.00000089   | -0.000000001 | 0.000000119  |
| 6 | 0.000000374  | 0.000000234  | 0.000000874  |
| 6 | -0.000000369 | -0.000000292 | 0.000000717  |
| 6 | -0.000000473 | 0.000000046  | 0.000000217  |
| 6 | -0.00000072  | 0.000000246  | 0.000000029  |
| 6 | -0.000000371 | 0.000000076  | 0.000000462  |
| 1 | -0.000000779 | -0.000000004 | 0.000000434  |
| 1 | -0.000000109 | 0.000000062  | 0.000000019  |
| 7 | -0.000000499 | 0.000000159  | -0.000000167 |
| 8 | 0.00000018   | 0.000001108  | 0.000000974  |
| 1 | -0.000000979 | 0.000000138  | 0.000000198  |
| 1 | -0.000000268 | -0.000000159 | 0.000000651  |

|                                              |            |             |                             |
|----------------------------------------------|------------|-------------|-----------------------------|
| 17                                           | -0.0000008 | 0.000000048 | -0.000000003                |
| Zero-point correction=                       |            |             | 1.218901 (Hartree/Particle) |
| Thermal correction to Energy=                |            |             | 1.295502                    |
| Thermal correction to Enthalpy=              |            |             | 1.296447                    |
| Thermal correction to Gibbs Free Energy=     |            |             | 1.095754                    |
| Sum of electronic and zero-point Energies=   |            |             | -4408.200434                |
| Sum of electronic and thermal Energies=      |            |             | -4408.123833                |
| Sum of electronic and thermal Enthalpies=    |            |             | -4408.122889                |
| Sum of electronic and thermal Free Energies= |            |             | -4408.323581                |

E-1a

|    |              |              |              |
|----|--------------|--------------|--------------|
| 6  | -0.00003955  | 0.00001238   | -0.00000879  |
| 6  | 0.00001145   | -0.00002775  | 0.00000349   |
| 7  | 0.00001987   | -0.0000068   | 0.00000886   |
| 7  | -0.00001375  | 0.000009595  | 0.00000497   |
| 16 | -0.00000612  | 0.00000228   | -0.0000069   |
| 8  | 0.00000269   | -0.00000594  | -0.00000181  |
| 8  | 0.00000792   | 0.0000065    | 0.000002017  |
| 6  | 0.00001254   | 0.00000455   | 0.00000581   |
| 6  | 0.00000585   | -0.00001305  | -0.0000084   |
| 6  | 0.00000837   | 0.00000722   | 0.000002034  |
| 6  | -0.00002614  | -0.00002527  | 0.000001617  |
| 6  | -0.00000041  | 0.00000385   | -0.00000642  |
| 6  | -0.00000005  | 0.00000771   | 0.000003449  |
| 1  | -0.00000072  | 0.00000558   | 0.00000128   |
| 1  | -0.00000105  | -0.00000724  | 0.00000468   |
| 1  | -0.00000216  | -0.00000164  | 0.000001463  |
| 1  | 0.00000613   | -0.00000559  | 0.000001146  |
| 6  | -0.00000618  | -0.00001161  | 0.00000977   |
| 1  | -0.00001485  | -0.00000392  | 0.00000122   |
| 1  | -0.00000015  | -0.00001554  | 0.000002211  |
| 1  | 0.00001172   | 0.00000427   | 0.00000626   |
| 6  | -0.00001334  | 0.00000384   | 0.00000082   |
| 1  | 0.00000253   | 0.00000857   | 0.000000139  |
| 1  | 0.00000207   | -0.00000992  | 0.000000034  |
| 16 | 0.000006726  | -0.000006686 | -0.000007263 |
| 8  | 0.000004784  | 0.00000143   | 0.000001941  |
| 8  | -0.000007431 | -0.00000221  | 0.000000419  |
| 6  | -0.00001855  | 0.00000377   | 0.000001939  |
| 6  | -0.00001463  | 0.000002501  | 0.000000463  |
| 6  | -0.00000647  | 0.000001063  | 0.000000915  |
| 6  | 0.000002963  | 0.00000762   | 0.000002258  |
| 1  | 0.00001253   | 0.00000139   | 0.000000892  |
| 6  | 0.0000166    | -0.00000893  | -0.000000282 |



|    |              |              |              |
|----|--------------|--------------|--------------|
| 1  | 0.000001206  | 0.000000303  | 0.000001811  |
| 6  | -0.000000795 | 0.000001648  | 0.000000378  |
| 1  | 0.00000116   | 0.000000597  | 0.000000368  |
| 1  | 0.000001126  | 0.000000098  | 0.000001916  |
| 6  | 0.000000454  | 0.000001742  | 0.000003304  |
| 1  | 0.000002428  | 0.000000572  | 0.000000682  |
| 1  | 0.000001225  | 0.000000061  | 0.000000512  |
| 1  | 0.000001196  | 0.000000874  | 0.000002111  |
| 6  | 0.000003248  | -0.000001755 | -0.000000267 |
| 6  | -0.000001119 | -0.000001545 | -0.000002162 |
| 6  | -0.000001986 | -0.000002522 | 0.000000136  |
| 1  | -0.000002999 | 0.000002033  | 0.000003553  |
| 6  | 0.000000096  | 0.000000821  | 0.000000928  |
| 1  | 0.000001165  | -0.000001488 | 0.000001192  |
| 1  | -0.000002194 | -0.000001323 | 0.000001587  |
| 6  | 0.000000055  | -0.000001428 | -0.000000025 |
| 1  | 0.000001598  | -0.000000348 | 0.000001552  |
| 1  | 0.00000023   | -0.000000615 | 0.000000769  |
| 6  | -0.000000585 | -0.000000091 | 0.000001872  |
| 1  | -0.000001667 | -0.000001525 | -0.000000251 |
| 1  | -0.00000042  | -0.000001495 | 0.000000762  |
| 1  | -0.000000307 | -0.000000494 | 0.000001787  |
| 1  | -0.000000184 | -0.000001235 | 0.000001895  |
| 1  | -0.000000463 | -0.000001395 | 0.000001387  |
| 1  | -0.000000573 | -0.000001268 | 0.000000095  |
| 6  | -0.000005053 | -0.000004406 | 0.000003907  |
| 6  | -0.000000297 | 0.000000214  | -0.000002788 |
| 6  | 0.000002778  | 0.000001689  | 0.000002455  |
| 6  | 0.000001601  | 0.000001701  | 0.000002841  |
| 1  | 0.000000059  | -0.000000675 | 0.000001144  |
| 6  | -0.000000026 | -0.000001179 | -0.000000713 |
| 1  | 0.00000007   | -0.000000473 | 0.000001701  |
| 6  | -0.00000237  | -0.000002644 | 0.000003011  |
| 1  | -0.000000959 | -0.000001198 | 0.000000826  |
| 1  | -0.000000049 | -0.000000763 | 0.000002517  |
| 1  | -0.000000367 | -0.000000976 | 0.000001463  |
| 79 | -0.000003817 | -0.000000408 | -0.000002377 |
| 6  | 0.000006156  | -0.000004465 | 0.000003853  |
| 6  | 0.000000021  | -0.000002696 | 0.000000824  |
| 6  | 0.000002762  | 0.000003174  | -0.000003605 |
| 1  | 0.000000372  | 0.000000704  | -0.000000551 |
| 1  | -0.000000239 | 0.000000336  | -0.000001467 |
| 7  | -0.000001473 | 0.000000394  | -0.000005545 |
| 7  | -0.000001549 | 0.000005308  | 0.000000307  |

|   |              |              |              |
|---|--------------|--------------|--------------|
| 6 | 0.000001128  | 0.000000159  | 0.000000373  |
| 6 | -0.00000145  | 0.000000892  | -0.000002642 |
| 6 | -0.000000504 | 0.000000078  | -0.000000093 |
| 6 | -0.000000938 | 0.000000974  | -0.000001156 |
| 6 | -0.000002332 | -0.000001313 | -0.000000231 |
| 6 | 0.000000046  | -0.000000792 | -0.000001469 |
| 1 | -0.000000282 | -0.000000589 | -0.00000129  |
| 1 | -0.000001036 | -0.000000584 | -0.000001429 |
| 1 | -0.000001566 | -0.000001044 | -0.000001337 |
| 6 | -0.000003556 | -0.000001437 | -0.00000193  |
| 6 | 0.000001441  | 0.000002865  | -0.000001603 |
| 6 | 0.000001413  | 0.000000568  | -0.000002755 |
| 6 | 0.000002016  | 0.000000444  | -0.000001496 |
| 6 | 0.000000311  | 0.00000106   | 0.000000596  |
| 6 | 0.000000226  | 0.000001546  | 0.000001165  |
| 1 | 0.000001412  | 0.000000729  | -0.000000457 |
| 1 | 0.000001868  | 0.00000126   | -0.000000079 |
| 1 | 0.000001539  | 0.000001697  | 0.000000205  |
| 6 | -0.000000564 | 0.000000023  | -0.000000183 |
| 6 | 0.000000559  | 0.000000299  | -0.000001637 |
| 6 | 0.000001212  | 0.000001878  | 0.000000143  |
| 1 | 0.000000807  | -0.00000006  | -0.000000055 |
| 1 | 0.00000044   | 0.000001515  | -0.000000651 |
| 1 | 0.000000767  | 0.000000558  | -0.000000561 |
| 1 | 0.000000535  | 0.000001156  | -0.000000512 |
| 1 | -0.000000417 | -0.000000022 | 0.000000174  |
| 1 | 0.000000086  | 0.00000046   | 0.000000762  |
| 1 | 0.000000512  | 0.000000709  | -0.000000105 |
| 6 | -0.000000855 | -0.000001784 | -0.000001999 |
| 6 | 0.000002713  | 0.000003001  | 0.000000036  |
| 6 | 0.000001063  | 0.000002687  | -0.000000528 |
| 1 | 0.000001082  | 0.000001003  | 0.000000084  |
| 1 | 0.000000617  | 0.00000073   | -0.000000709 |
| 1 | 0.000000128  | 0.000000125  | -0.000001199 |
| 1 | 0.000001123  | 0.000000672  | -0.000000166 |
| 1 | 0.000000789  | 0.000001211  | -0.00000162  |
| 1 | 0.000000951  | 0.000001206  | -0.000000804 |
| 1 | 0.000000428  | 0.000001482  | -0.000001405 |
| 6 | -0.000000276 | -0.000000778 | -0.000001102 |
| 6 | -0.000001033 | -0.000002568 | -0.000000469 |
| 6 | -0.000001559 | -0.000000201 | -0.000001211 |
| 1 | -0.000000172 | 0.000000392  | -0.000000825 |
| 1 | 0.000000621  | -0.000000325 | -0.00000006  |
| 1 | -0.000000076 | 0.000000173  | -0.000000425 |

|    |              |              |              |
|----|--------------|--------------|--------------|
| 1  | -0.000000849 | -0.000000181 | -0.000000841 |
| 1  | -0.000000447 | -0.000000071 | -0.000001563 |
| 1  | -0.000000837 | -0.000000503 | -0.000001038 |
| 1  | -0.000000682 | -0.000000041 | -0.00000107  |
| 6  | 0.00000148   | 0.00000032   | -0.00000113  |
| 6  | -0.000001307 | -0.000001156 | -0.000001569 |
| 6  | -0.000001318 | 0.000000705  | 0.00000036   |
| 1  | 0.00000014   | 0.000001024  | -0.000001117 |
| 1  | -0.00000037  | 0.00000076   | -0.000002083 |
| 1  | -0.000000153 | 0.00000006   | -0.000001964 |
| 1  | -0.000000547 | 0.000000641  | -0.000002502 |
| 1  | 0.000000149  | 0.000000478  | -0.000001053 |
| 1  | -0.00000067  | -0.000000134 | -0.000001724 |
| 1  | -0.000000422 | 0.000000271  | -0.000002142 |
| 6  | 0.000000056  | -0.000000533 | 0.000001343  |
| 6  | -0.000000288 | -0.000000114 | -0.000002034 |
| 6  | -0.000000392 | -0.000001705 | -0.000000889 |
| 6  | -0.000001131 | 0.000000975  | -0.000001232 |
| 6  | 0.000000152  | -0.000003791 | 0.000002885  |
| 1  | -0.000001525 | -0.000001359 | -0.00000069  |
| 1  | -0.000000996 | 0.000000601  | 0.000001075  |
| 7  | -0.000002928 | -0.000000189 | -0.000004314 |
| 8  | 0.000003572  | -0.000001262 | 0.000000315  |
| 1  | -0.000000911 | -0.000000255 | -0.000000952 |
| 1  | -0.000000655 | -0.000000381 | -0.000000907 |
| 17 | -0.000001683 | -0.000000321 | 0.000000436  |

Zero-point correction=

1.221580 (Hartree/Particle)

Thermal correction to Energy=

1.297773

Thermal correction to Enthalpy=

1.298717

Thermal correction to Gibbs Free Energy=

1.100082

Sum of electronic and zero-point Energies=

-4408.207202

Sum of electronic and thermal Energies=

-4408.131009

Sum of electronic and thermal Enthalpies=

-4408.130065

Sum of electronic and thermal Free Energies=

-4408.328700

E-TS1b

|    |              |              |              |
|----|--------------|--------------|--------------|
| 6  | 0.00000034   | -0.000001202 | -0.000000066 |
| 6  | 0.000002195  | 0.000001232  | 0.000000324  |
| 7  | 0.000001237  | 0.000001228  | 0.000000919  |
| 7  | -0.000001645 | -0.000000587 | -0.000000935 |
| 16 | 0.000000817  | 0.000001282  | -0.000000335 |
| 8  | 0.000001114  | 0.000001977  | 0.000000198  |
| 8  | 0.00000111   | 0.000002065  | -0.000001026 |
| 6  | 0.000001046  | 0.000001339  | -0.000000059 |

|    |             |             |             |
|----|-------------|-------------|-------------|
| 6  | 0.00000827  | 0.00000466  | -0.0000062  |
| 6  | 0.00001478  | 0.00000428  | -0.00000329 |
| 6  | 0.00001997  | 0.00002145  | -0.00000251 |
| 6  | 0.0000236   | 0.0000171   | -0.00000682 |
| 6  | 0.00001952  | 0.00001486  | -0.00000412 |
| 1  | 0.00000828  | 0.00000441  | -0.00000226 |
| 1  | 0.00001542  | 0.00000494  | -0.00000219 |
| 1  | 0.00002755  | 0.00002255  | -0.00000884 |
| 1  | 0.00002072  | 0.00002234  | -0.00000877 |
| 6  | 0.00002923  | 0.00001376  | -0.00000748 |
| 1  | 0.00002847  | 0.0000113   | -0.0000054  |
| 1  | 0.00002033  | 0.00001245  | -0.00000847 |
| 1  | 0.00002351  | 0.00000485  | -0.00000633 |
| 6  | 0.00002302  | 0.00001047  | -0.000008   |
| 1  | 0.00002252  | 0.00001136  | -0.00000388 |
| 1  | 0.00002052  | 0.00000551  | -0.00000425 |
| 16 | 0.0000066   | -0.00001789 | -0.00000115 |
| 8  | -0.00000267 | -0.00001858 | 0.00000987  |
| 8  | 0.00000154  | -0.00001102 | 0.0000016   |
| 6  | 0.00000906  | -0.00002583 | 0.00000321  |
| 6  | 0.00000673  | -0.00002089 | -0.0000061  |
| 6  | 0.00000802  | -0.00002893 | 0.00000803  |
| 6  | 0.00002308  | -0.00003283 | 0.00000928  |
| 1  | 0.00000546  | -0.00002404 | 0.00000595  |
| 6  | 0.00000642  | -0.0000338  | 0.00000782  |
| 1  | 0.00001486  | -0.00001902 | 0.00000539  |
| 6  | 0.00000338  | -0.00002447 | -0.00001324 |
| 1  | 0.00001049  | -0.00003894 | 0.00001067  |
| 1  | 0.00001918  | -0.00003125 | 0.00000735  |
| 6  | 0.00002941  | -0.00005339 | 0.00002773  |
| 1  | 0.00002448  | -0.00004495 | 0.00000883  |
| 1  | 0.00001718  | -0.0000435  | 0.00001119  |
| 1  | 0.00001696  | -0.00004568 | 0.00001058  |
| 6  | 0.00000674  | -0.00000677 | 0.0000021   |
| 6  | 0.0000032   | -0.00001382 | 0.00000426  |
| 6  | -0.00000093 | -0.00000518 | -0.00000097 |
| 1  | 0.00000861  | -0.00000444 | -0.00000084 |
| 6  | 0.00000593  | -0.00001274 | 0.00000316  |
| 1  | 0.00000057  | -0.00002271 | 0.00000258  |
| 1  | 0.00001169  | -0.00001613 | 0.00000224  |
| 6  | -0.00000237 | 0.00000216  | 0.00000154  |
| 1  | -0.00000646 | -0.00000538 | 0.00000259  |
| 1  | -0.0000034  | 0.00000229  | 0.00000099  |
| 6  | -0.00000083 | -0.0000116  | 0.00000278  |

|    |             |             |              |
|----|-------------|-------------|--------------|
| 1  | 0.00000695  | -0.00001838 | 0.00000415   |
| 1  | 0.00001203  | -0.00000977 | 0.00000091   |
| 1  | -0.00001107 | -0.00000442 | 0.00000033   |
| 1  | 0.00000301  | 0.00000119  | -0.00000008  |
| 1  | -0.00000112 | -0.00000815 | 0.000000178  |
| 1  | -0.00000665 | -0.00001274 | 0.000000364  |
| 6  | 0.00002618  | -0.00000075 | -0.00000018  |
| 6  | 0.00001882  | -0.00000361 | -0.000000223 |
| 6  | 0.00003128  | -0.00000011 | -0.000000205 |
| 6  | 0.00002236  | -0.00000896 | -0.000000324 |
| 1  | 0.0000155   | -0.00000528 | 0.00000023   |
| 6  | 0.00003568  | -0.00000642 | -0.000000167 |
| 1  | 0.00003423  | 0.00000032  | -0.000000489 |
| 6  | 0.00003231  | -0.00001268 | 0.000000007  |
| 1  | 0.00002166  | -0.00001417 | 0.000000185  |
| 1  | 0.00004123  | -0.0000007  | -0.000000285 |
| 1  | 0.00003461  | -0.00001585 | -0.000000037 |
| 79 | -0.00001168 | 0.00000733  | -0.00001867  |
| 6  | -0.00001357 | 0.00000934  | 0.000000318  |
| 6  | -0.00002734 | 0.00000836  | 0.000000073  |
| 6  | -0.00002518 | 0.00001448  | -0.000000012 |
| 1  | -0.00002959 | 0.00001949  | -0.000000153 |
| 1  | -0.00003287 | 0.00000603  | 0.000000217  |
| 7  | -0.00001915 | 0.00000409  | 0.000000686  |
| 7  | -0.00001842 | 0.00001186  | -0.000000154 |
| 6  | -0.00002182 | -0.00000026 | 0.000000089  |
| 6  | -0.00002313 | -0.00000933 | 0.000000446  |
| 6  | -0.00002011 | -0.00000723 | 0.000000356  |
| 6  | -0.00002185 | -0.00001612 | 0.000000727  |
| 6  | -0.000019   | -0.00001299 | 0.000000686  |
| 6  | -0.00002184 | -0.00001788 | 0.000000627  |
| 1  | -0.00002422 | -0.00001956 | 0.000000754  |
| 1  | -0.00001645 | -0.00001443 | 0.00000051   |
| 1  | -0.00002082 | -0.00002343 | 0.00000083   |
| 6  | -0.00001809 | 0.00001983  | -0.000000374 |
| 6  | -0.00000906 | 0.00002681  | -0.000000742 |
| 6  | -0.00001648 | 0.00002186  | -0.000000368 |
| 6  | -0.00001028 | 0.00003554  | -0.000000713 |
| 6  | -0.00001228 | 0.00002842  | -0.000000657 |
| 6  | -0.00000809 | 0.00003374  | -0.000000661 |
| 1  | -0.00000773 | 0.00003676  | -0.000000904 |
| 1  | -0.00001132 | 0.00002969  | -0.000000658 |
| 1  | -0.00000687 | 0.00003848  | -0.000000912 |
| 6  | -0.00001207 | 0.00002389  | -0.000000417 |

|   |              |              |              |
|---|--------------|--------------|--------------|
| 6 | -0.000002052 | 0.000002691  | -0.000000476 |
| 6 | -0.000000958 | 0.00000277   | -0.000000656 |
| 1 | -0.000001611 | 0.000002105  | -0.000000215 |
| 1 | -0.000002558 | 0.000002478  | -0.000000369 |
| 1 | -0.000002151 | 0.000002767  | -0.000000407 |
| 1 | -0.000002265 | 0.000003471  | -0.00000062  |
| 1 | -0.00000044  | 0.000002728  | -0.000000465 |
| 1 | -0.000000794 | 0.000003295  | -0.000000915 |
| 1 | -0.000000613 | 0.000002858  | -0.00000057  |
| 6 | -0.000001719 | 0.000001786  | -0.00000018  |
| 6 | -0.000001133 | 0.000001636  | -0.000000029 |
| 6 | -0.000002596 | 0.000001783  | -0.000000138 |
| 1 | -0.000001719 | 0.00000114   | 0.000000052  |
| 1 | -0.000000589 | 0.000001455  | -0.000000451 |
| 1 | -0.000001419 | 0.000001319  | -0.000000133 |
| 1 | -0.000001201 | 0.000001985  | -0.00000039  |
| 1 | -0.000002994 | 0.000001893  | -0.000000106 |
| 1 | -0.000002537 | 0.000002548  | -0.000000396 |
| 1 | -0.000002797 | 0.000001513  | -0.000000084 |
| 6 | -0.000001431 | -0.000000015 | 0.000000212  |
| 6 | -0.000000942 | -0.000000011 | 0.000000204  |
| 6 | -0.000002185 | 0.000000306  | 0.0000001    |
| 1 | -0.000001595 | 0.000000478  | -0.000000003 |
| 1 | -0.000000456 | -0.000000112 | -0.000000002 |
| 1 | -0.000000669 | 0.000000346  | -0.000000003 |
| 1 | -0.000000845 | -0.000000611 | 0.000000248  |
| 1 | -0.000002709 | 0.000000393  | 0.000000178  |
| 1 | -0.000002336 | -0.000000363 | 0.000000456  |
| 1 | -0.000002036 | 0.000000615  | 0.000000078  |
| 6 | -0.000002307 | -0.000000557 | 0.000000799  |
| 6 | -0.000003439 | -0.000000615 | 0.000000665  |
| 6 | -0.000002404 | -0.000001211 | 0.000000444  |
| 1 | -0.000002547 | -0.000000103 | 0.000000134  |
| 1 | -0.000003698 | -0.000000289 | 0.000000568  |
| 1 | -0.000003574 | -0.00000053  | 0.000000573  |
| 1 | -0.000003645 | -0.000001229 | 0.000000637  |
| 1 | -0.000001724 | -0.000001345 | 0.000000723  |
| 1 | -0.000002469 | -0.000001719 | 0.000000696  |
| 1 | -0.000002401 | -0.000001089 | 0.000000551  |
| 6 | 0.000001803  | -0.000001271 | 0.000000159  |
| 6 | 0.000002831  | -0.000001551 | 0.000000135  |
| 6 | 0.000002977  | -0.000001794 | -0.00000001  |
| 6 | 0.000002807  | -0.000001106 | 0.000000019  |
| 6 | 0.00000273   | -0.000000924 | 0.000000000  |

|                                              |             |              |                             |
|----------------------------------------------|-------------|--------------|-----------------------------|
| 1                                            | 0.000003369 | -0.000002239 | 0.000000191                 |
| 1                                            | 0.000001962 | -0.000000906 | 0.000000037                 |
| 7                                            | 0.000001507 | -0.000000876 | -0.000000248                |
| 8                                            | 0.000002218 | 0.000001406  | -0.000000067                |
| 1                                            | 0.000003217 | -0.000001078 | -0.000000115                |
| 1                                            | 0.000002709 | -0.000002284 | 0.000000278                 |
| 17                                           | 0.000002581 | 0.000000184  | -0.000000343                |
| Zero-point correction=                       |             |              | 1.220037 (Hartree/Particle) |
| Thermal correction to Energy=                |             |              | 1.296027                    |
| Thermal correction to Enthalpy=              |             |              | 1.296971                    |
| Thermal correction to Gibbs Free Energy=     |             |              | 1.099294                    |
| Sum of electronic and zero-point Energies=   |             |              | -4408.199278                |
| Sum of electronic and thermal Energies=      |             |              | -4408.123288                |
| Sum of electronic and thermal Enthalpies=    |             |              | -4408.122344                |
| Sum of electronic and thermal Free Energies= |             |              | -4408.320021                |

#### E-1b

|    |              |              |              |
|----|--------------|--------------|--------------|
| 6  | -0.000151581 | -0.000137885 | 0.000016026  |
| 6  | 0.000118624  | 0.000088276  | 0.000020144  |
| 7  | 0.000132959  | 0.000028897  | -0.000066953 |
| 7  | 0.000041987  | 0.000051991  | 0.000138898  |
| 16 | -0.000089461 | 0.000071478  | 0.000071554  |
| 8  | -0.000011114 | -0.000051818 | -0.000049154 |
| 8  | 0.000025079  | -0.00004326  | -0.000018193 |
| 6  | 0.000024742  | 0.000019636  | 0.000010896  |
| 6  | -0.000026313 | -0.000008038 | -0.000003555 |
| 6  | -0.000002308 | -0.000005731 | 0.000006552  |
| 6  | 0.000003069  | -0.000000851 | -0.000010084 |
| 6  | 0.000013964  | -0.000001254 | 0.000001975  |
| 6  | -0.000001543 | -0.000012274 | 0.00001223   |
| 1  | -0.000013947 | 0.000007667  | 0.000000079  |
| 1  | -0.000027045 | 0.000000641  | -0.000015451 |
| 1  | -0.000002554 | 0.000004626  | -0.000000512 |
| 1  | 0.000004152  | 0.000012758  | -0.000006792 |
| 6  | -0.000003658 | 0.000001534  | -0.000002274 |
| 1  | -0.000004692 | -0.000001416 | 0.000000995  |
| 1  | -0.00001082  | 0.000000246  | -0.000008631 |
| 1  | 0.000004853  | 0.000010197  | -0.000002742 |
| 6  | 0.000039571  | -0.000024023 | -0.000027229 |
| 1  | -0.000000733 | 0.000014311  | 0.000037216  |
| 1  | -0.000008796 | 0.000006549  | -0.000048496 |
| 16 | 0.000059186  | 0.000011925  | -0.000078715 |
| 8  | -0.0000442   | 0.00000624   | 0.000025365  |
| 8  | 0.000000795  | 0.000003939  | 0.000035443  |

|    |              |              |              |
|----|--------------|--------------|--------------|
| 6  | -0.000058605 | 0.000018406  | -0.000006192 |
| 6  | 0.000026928  | -0.000031205 | 0.000023342  |
| 6  | 0.000039907  | -0.000017677 | 0.000015525  |
| 6  | -0.0000031   | 0.000008763  | 0.000009498  |
| 1  | -0.000009193 | 0.000001027  | 0.00000138   |
| 6  | -0.000017174 | 0.000021657  | -0.000000856 |
| 1  | -0.000010318 | 0.000011469  | -0.000012901 |
| 6  | 0.000005855  | -0.00001286  | -0.000002892 |
| 1  | -0.000001114 | -0.000000027 | -0.000001358 |
| 1  | 0.000004315  | -0.000002534 | 0.000001561  |
| 6  | 0.000000344  | 0.00000367   | 0.000006316  |
| 1  | -0.000003901 | 0.00000045   | -0.000001527 |
| 1  | -0.000001447 | -0.000002154 | 0.000000328  |
| 1  | 0.000001946  | 0.000001527  | -0.000001583 |
| 6  | -0.000002729 | -0.000024225 | -0.00004861  |
| 6  | 0.000014277  | 0.000027048  | 0.000007003  |
| 6  | -0.000012166 | -0.000038609 | 0.000021071  |
| 1  | 0.000001774  | 0.000019754  | 0.000014838  |
| 6  | -0.000003138 | -0.000030164 | 0.000013497  |
| 1  | -0.000010861 | -0.000008067 | -0.000017131 |
| 1  | 0.000007341  | -0.000001749 | 0.000000734  |
| 6  | -0.000048786 | 0.000021152  | 0.000003995  |
| 1  | 0.000008401  | -0.000003764 | 0.000014508  |
| 1  | -0.000010327 | 0.000004892  | 0.000012107  |
| 6  | 0.000010942  | 0.000000724  | -0.000040306 |
| 1  | -0.000001541 | 0.000001189  | -0.000005122 |
| 1  | 0.000000878  | 0.000005406  | 0.000003246  |
| 1  | 0.000017719  | 0.0000112    | 0.000015165  |
| 1  | 0.000010539  | -0.000008961 | -0.000002193 |
| 1  | 0.000008313  | -0.000007382 | 0.000004443  |
| 1  | 0.000000159  | 0.000001918  | 0.000010098  |
| 6  | -0.000089047 | -0.000054008 | -0.000016539 |
| 6  | 0.000036439  | 0.000033644  | 0.000029504  |
| 6  | 0.000009384  | 0.000030693  | -0.000025161 |
| 6  | 0.000020089  | 0.000020486  | -0.000017862 |
| 1  | 0.000010044  | -0.000027811 | -0.00002864  |
| 6  | 0.000016106  | -0.00000662  | 0.000034839  |
| 1  | 0.000007448  | 0.000000635  | 0.000000015  |
| 6  | -0.000025614 | -0.000015628 | -0.000017453 |
| 1  | -0.000001794 | 0.000008707  | 0.000001577  |
| 1  | -0.000002131 | -0.00000092  | -0.000000507 |
| 1  | -0.000004095 | 0.000000549  | 0.000004292  |
| 79 | 0.00011514   | -0.000045182 | -0.000049005 |
| 6  | -0.000074683 | -0.000014646 | 0.000055387  |



|   |              |              |              |
|---|--------------|--------------|--------------|
| 6 | 0.00000103   | -0.000012842 | -0.000002187 |
| 6 | -0.000029121 | 0.000017881  | -0.000036373 |
| 1 | -0.00001085  | 0.000011461  | 0.000004192  |
| 1 | 0.000005836  | -0.000001769 | -0.000015452 |
| 7 | -0.000038582 | 0.000067091  | 0.000061     |
| 7 | 0.000022276  | 0.000004849  | -0.000007437 |
| 6 | 0.000018988  | 0.000007865  | -0.00006542  |
| 6 | 0.000001791  | -0.000013608 | -0.000042073 |
| 6 | -0.0000268   | 0.000005088  | 0.000074447  |
| 6 | -0.000028999 | -0.000034809 | 0.000045369  |
| 6 | 0.000010666  | 0.000025447  | 0.000018288  |
| 6 | 0.000041604  | 0.000007437  | -0.000046088 |
| 1 | 0.000010782  | 0.000001059  | 0.000004947  |
| 1 | -0.000002585 | 0.000007654  | 0.000002905  |
| 1 | -0.000012229 | -0.000004321 | -0.000007924 |
| 6 | -0.000057211 | 0.000066288  | 0.000048211  |
| 6 | 0.000030089  | -0.000052497 | -0.000013057 |
| 6 | -0.000013307 | -0.000008861 | -0.000022228 |
| 6 | 0.000023628  | 0.000003191  | 0.000052485  |
| 6 | -0.000014225 | 0.000010338  | 0.000011364  |
| 6 | 0.000031377  | -0.000032055 | -0.000035155 |
| 1 | -0.000009919 | -0.000005413 | -0.000006907 |
| 1 | 0.000009508  | 0.000008388  | -0.000014673 |
| 1 | 0.000009325  | 0.000000667  | -0.000002519 |
| 6 | 0.000008078  | 0.000022177  | -0.000009302 |
| 6 | -0.000008276 | -0.00003739  | -0.000009567 |
| 6 | -0.000007684 | 0.000009659  | -0.000024464 |
| 1 | -0.000008883 | -0.000001267 | -0.000006737 |
| 1 | 0.000022982  | 0.000006555  | 0.000005499  |
| 1 | -0.000002783 | 0.000000883  | -0.000001144 |
| 1 | 0.000002803  | 0.000001364  | 0.000001744  |
| 1 | 0.00001328   | 0.000016091  | 0.000033671  |
| 1 | 0.000012194  | -0.00000961  | -0.000016463 |
| 1 | 0.000004339  | 0.000015879  | 0.000005527  |
| 6 | 0.00004705   | 0.000013828  | -0.000000226 |
| 6 | 0.000008383  | -0.000027112 | -0.000028937 |
| 6 | -0.000025279 | -0.000018428 | 0.000011809  |
| 1 | -0.000004107 | 0.000003572  | -0.000024348 |
| 1 | -0.000011913 | 0.000019762  | 0.000001861  |
| 1 | -0.000007184 | 0.000000343  | 0.000017202  |
| 1 | -0.000000486 | 0.000012702  | -0.000007875 |
| 1 | 0.000015978  | 0.000011265  | 0.000000033  |
| 1 | 0.000005616  | -0.000002425 | -0.000009193 |
| 1 | -0.000001849 | -0.000002459 | 0.000003637  |

|    |              |              |              |
|----|--------------|--------------|--------------|
| 6  | -0.000052307 | 0.000001764  | -0.000051641 |
| 6  | 0.000004135  | -0.000000199 | 0.00000896   |
| 6  | -0.000007637 | -0.000036945 | 0.000033345  |
| 1  | 0.000018051  | -0.000001463 | 0.00003393   |
| 1  | 0.00000603   | -0.000007166 | 0.000020264  |
| 1  | 0.00001796   | -0.000006473 | -0.0000099   |
| 1  | 0.000004386  | -0.000003407 | -0.00001201  |
| 1  | 0.000013805  | -0.000002557 | -0.000012132 |
| 1  | 0.000009866  | 0.000016073  | 0.000003348  |
| 1  | -0.00000417  | -0.000000638 | 0.000002759  |
| 6  | -0.000016634 | -0.000041934 | 0.000025934  |
| 6  | 0.00000868   | 0.00001945   | -0.000004896 |
| 6  | 0.000048019  | 0.000000576  | -0.000010482 |
| 1  | 0.000011326  | -0.00000886  | 0.000013125  |
| 1  | 0.00000883   | -0.000020056 | -0.000005447 |
| 1  | -0.000000798 | -0.000003905 | 0.000000156  |
| 1  | -0.000004728 | 0.000003645  | 0.000010904  |
| 1  | -0.000016094 | 0.000012407  | -0.000001854 |
| 1  | -0.000006793 | -0.000000122 | 0.000015593  |
| 1  | 0.000001098  | 0.000000285  | 0.000016797  |
| 6  | -0.000016946 | 0.000033566  | -0.000030837 |
| 6  | -0.00002693  | 0.000002592  | 0.000022163  |
| 6  | -0.000000197 | -0.000014804 | -0.000009986 |
| 6  | 0.000014186  | 0.000022075  | 0.000000488  |
| 6  | -0.000041326 | -0.0000411   | -0.000029282 |
| 1  | 0.000001184  | -0.000005094 | -0.000003284 |
| 1  | 0.000022394  | -0.000018317 | -0.000050388 |
| 7  | 0.000069285  | -0.000035358 | 0.000099926  |
| 8  | -0.000183935 | 0.000044693  | -0.000071715 |
| 1  | -0.000000707 | 0.000000302  | -0.000003165 |
| 1  | 0.000019504  | -0.000002888 | -0.000001249 |
| 17 | 0.00001239   | 0.00002481   | 0.000005108  |

Zero-point correction=

1.221162 (Hartree/Particle)

Thermal correction to Energy=

1.297491

Thermal correction to Enthalpy=

1.298435

Thermal correction to Gibbs Free Energy=

1.098671

Sum of electronic and zero-point Energies=

-4408.214268

Sum of electronic and thermal Energies=

-4408.137940

Sum of electronic and thermal Enthalpies=

-4408.136996

Sum of electronic and thermal Free Energies=

-4408.336760

E-TS2b

|   |             |              |              |
|---|-------------|--------------|--------------|
| 6 | -0.00000094 | -0.00000026  | 0.000000012  |
| 6 | 0.000000357 | -0.000000719 | -0.000000774 |

|    |              |              |              |
|----|--------------|--------------|--------------|
| 7  | -0.000000295 | -0.000000702 | -0.00000171  |
| 7  | 0.000000327  | -0.000000442 | 0.00000027   |
| 16 | -0.000000709 | -0.000002599 | -0.000001777 |
| 8  | -0.000000741 | -0.000001197 | -0.000002037 |
| 8  | 0.000000177  | -0.000001438 | -0.00000233  |
| 6  | 0.000000059  | -0.000001534 | -0.000001653 |
| 6  | 0.000000627  | -0.000001717 | -0.000001275 |
| 6  | 0.000000881  | -0.00000185  | -0.000001366 |
| 6  | 0.00000129   | -0.000002347 | -0.000001265 |
| 6  | 0.000001555  | -0.000001901 | -0.000001682 |
| 6  | 0.000001053  | -0.000002166 | -0.00000191  |
| 1  | -0.000000235 | -0.000001165 | -0.000001714 |
| 1  | 0.000000682  | -0.000001208 | -0.000001189 |
| 1  | 0.000001813  | -0.000002314 | -0.000001964 |
| 1  | 0.00000111   | -0.00000211  | -0.00000215  |
| 6  | 0.000001634  | -0.000001795 | -0.000001909 |
| 1  | 0.00000209   | -0.000001471 | -0.000001274 |
| 1  | 0.000002366  | -0.000001939 | -0.000000247 |
| 1  | 0.000002301  | -0.000002163 | -0.000002877 |
| 6  | -0.000000059 | -0.000001197 | -0.000001598 |
| 1  | -0.000000866 | -0.000000587 | -0.000001015 |
| 1  | -0.000000237 | -0.000001127 | -0.000001477 |
| 16 | 0.000000389  | -0.000000076 | -0.000000282 |
| 8  | -0.000000051 | -0.00000008  | -0.000000055 |
| 8  | 0.000000782  | 0.000000497  | 0.000000828  |
| 6  | 0.000001662  | -0.000000722 | 0.000000046  |
| 6  | 0.000000516  | -0.000001642 | 0.000000006  |
| 6  | 0.000001825  | 0.000001339  | 0.000001071  |
| 6  | 0.000001206  | -0.000000104 | -0.000000006 |
| 1  | 0.000000687  | -0.000000989 | -0.000000089 |
| 6  | 0.000001612  | -0.000000639 | 0.000000997  |
| 1  | 0.000001765  | 0.000000264  | 0.000000827  |
| 6  | 0.000003377  | -0.000001447 | -0.000001385 |
| 1  | 0.000001156  | -0.00000111  | -0.000001139 |
| 1  | 0.000002279  | -0.000000058 | 0.000000713  |
| 6  | 0.000002147  | -0.000000894 | -0.000001301 |
| 1  | 0.000001592  | -0.000000809 | 0.000000619  |
| 1  | 0.000002773  | -0.000001152 | -0.000000068 |
| 1  | 0.000003141  | -0.000000566 | 0.000000937  |
| 6  | 0.000001477  | -0.000000556 | -0.000000047 |
| 6  | 0.000001405  | -0.000000157 | 0.000000894  |
| 6  | 0.000001358  | -0.000001333 | -0.000000756 |
| 1  | 0.000000087  | -0.000000098 | -0.000000037 |
| 6  | 0.000002655  | -0.000000373 | 0.000000678  |

|    |              |              |              |
|----|--------------|--------------|--------------|
| 1  | 0.000001662  | -0.000000021 | 0.000000624  |
| 1  | 0.000001578  | 0.000000253  | 0.000000494  |
| 6  | 0.000002707  | -0.000001196 | -0.000000962 |
| 1  | 0.000001975  | -0.000000934 | -0.000000495 |
| 1  | 0.000001506  | -0.000001335 | -0.000000957 |
| 6  | 0.000002741  | -0.000000919 | 0.000000043  |
| 1  | 0.000002706  | -0.000000258 | 0.000000686  |
| 1  | 0.00000219   | -0.000000568 | 0.000000205  |
| 1  | 0.000002752  | -0.000001556 | -0.000000692 |
| 1  | 0.000002312  | -0.000001452 | -0.000000765 |
| 1  | 0.000003191  | -0.000001092 | 0.000000047  |
| 1  | 0.000002983  | -0.00000082  | 0.000000244  |
| 6  | -0.000001447 | -0.0000008   | -0.000001456 |
| 6  | -0.000002004 | -0.000000561 | -0.000001433 |
| 6  | -0.000001601 | -0.000001309 | -0.000002201 |
| 6  | -0.000002477 | -0.000000507 | -0.000001523 |
| 1  | -0.000001556 | 0.000000019  | -0.000000839 |
| 6  | -0.000002416 | -0.000001239 | -0.00000237  |
| 1  | -0.000001383 | -0.00000164  | -0.000002404 |
| 6  | -0.000002891 | -0.000000802 | -0.000001984 |
| 1  | -0.000002845 | -0.000000057 | -0.000001209 |
| 1  | -0.000002655 | -0.000001547 | -0.000002744 |
| 1  | -0.000003346 | -0.000000756 | -0.000002159 |
| 79 | -0.000000425 | 0.00000005   | 0.000000149  |
| 6  | -0.000000443 | 0.000001323  | 0.000001066  |
| 6  | -0.000000096 | 0.000001524  | 0.000001597  |
| 6  | -0.000000818 | 0.000001808  | 0.000001617  |
| 1  | -0.000001214 | 0.000001961  | 0.000001778  |
| 1  | 0.000000152  | 0.000001618  | 0.000001908  |
| 7  | 0.000000197  | 0.000000886  | 0.000001092  |
| 7  | -0.000000625 | 0.000001222  | 0.000001234  |
| 6  | 0.000000837  | 0.000001206  | 0.000001095  |
| 6  | 0.00000143   | 0.000000901  | 0.000001735  |
| 6  | 0.000000945  | 0.000000431  | 0.000000626  |
| 6  | 0.000002013  | 0.00000071   | 0.000001427  |
| 6  | 0.00000166   | 0.000000206  | 0.000001216  |
| 6  | 0.000002136  | 0.000000569  | 0.000001226  |
| 1  | 0.000002392  | 0.000000756  | 0.000001967  |
| 1  | 0.000001904  | -0.000000073 | 0.000000717  |
| 1  | 0.000002749  | 0.000000207  | 0.000001345  |
| 6  | -0.000001946 | 0.000001299  | 0.000000057  |
| 6  | -0.000002072 | 0.000001341  | 0.000000705  |
| 6  | -0.000001611 | 0.000001536  | 0.000000955  |
| 6  | -0.000002444 | 0.000001323  | 0.000000433  |

|   |              |              |              |
|---|--------------|--------------|--------------|
| 6 | -0.000002211 | 0.000001671  | 0.000001033  |
| 6 | -0.000002895 | 0.000001516  | 0.000000505  |
| 1 | -0.000003003 | 0.000001147  | 0.000000098  |
| 1 | -0.000002476 | 0.000001704  | 0.00000109   |
| 1 | -0.000003378 | 0.000001486  | 0.000000399  |
| 6 | -0.000001966 | 0.000000966  | 0.000000359  |
| 6 | -0.000002477 | 0.000001289  | 0.000000577  |
| 6 | -0.000001861 | 0.000000424  | -0.000000345 |
| 1 | -0.000001298 | 0.000001002  | 0.000000591  |
| 1 | -0.000002403 | 0.000001618  | 0.000000888  |
| 1 | -0.000002278 | 0.000001118  | 0.000000376  |
| 1 | -0.000002971 | 0.000001199  | 0.000000271  |
| 1 | -0.000001627 | 0.000000011  | -0.000000411 |
| 1 | -0.000002519 | 0.000000358  | -0.000000494 |
| 1 | -0.000001809 | 0.000000291  | -0.000000415 |
| 6 | -0.000001222 | 0.00000159   | 0.000001576  |
| 6 | -0.000001002 | 0.000001449  | 0.000001223  |
| 6 | -0.000001456 | 0.000002277  | 0.000002087  |
| 1 | -0.000000569 | 0.000001577  | 0.000001462  |
| 1 | -0.000000982 | 0.000001123  | 0.000000844  |
| 1 | -0.000000662 | 0.000001546  | 0.000001468  |
| 1 | -0.000001469 | 0.000001553  | 0.000001196  |
| 1 | -0.000001472 | 0.000002505  | 0.000002199  |
| 1 | -0.000001875 | 0.000002354  | 0.000001999  |
| 1 | -0.000000975 | 0.000002362  | 0.000002273  |
| 6 | 0.000000517  | 0.000000251  | 0.000000471  |
| 6 | 0.00000059   | -0.000000307 | -0.000000231 |
| 6 | 0.000000546  | 0.000000473  | 0.000000822  |
| 1 | -0.00000007  | 0.00000029   | 0.000000714  |
| 1 | 0.000000461  | 0.000000002  | 0.000000164  |
| 1 | 0.000000094  | -0.000000263 | -0.000000455 |
| 1 | 0.000000916  | -0.000000658 | 0.000000004  |
| 1 | 0.0000005    | 0.000000828  | 0.000001128  |
| 1 | 0.000001     | 0.000000285  | 0.000000693  |
| 1 | 0.000000167  | 0.000000407  | 0.000000452  |
| 6 | 0.000001278  | 0.000001244  | 0.000001948  |
| 6 | 0.000001408  | 0.000001803  | 0.000002621  |
| 6 | 0.000001474  | 0.000001247  | 0.00000189   |
| 1 | 0.000000529  | 0.000001546  | 0.000002112  |
| 1 | 0.000001123  | 0.000002026  | 0.000002554  |
| 1 | 0.000001232  | 0.000002174  | 0.000002945  |
| 1 | 0.00000189   | 0.000001672  | 0.00000275   |
| 1 | 0.000001278  | 0.000000957  | 0.000001635  |
| 1 | 0.000001851  | 0.000001123  | 0.000001908  |

|                                                     |              |              |                                    |
|-----------------------------------------------------|--------------|--------------|------------------------------------|
| 1                                                   | 0.00000142   | 0.000001451  | 0.000002171                        |
| 6                                                   | -0.000002125 | -0.000000781 | -0.000001591                       |
| 6                                                   | -0.000002614 | -0.000000724 | -0.000001667                       |
| 6                                                   | -0.0000029   | -0.000000525 | -0.000001674                       |
| 6                                                   | -0.000002765 | -0.000000143 | -0.000001354                       |
| 6                                                   | -0.000002269 | -0.000000042 | -0.000000969                       |
| 1                                                   | -0.000003553 | -0.000000493 | -0.00000195                        |
| 1                                                   | -0.000001491 | -0.000000638 | -0.00000155                        |
| 7                                                   | -0.000001475 | -0.000000262 | -0.000000669                       |
| 8                                                   | -0.000001085 | -0.000000597 | -0.00000099                        |
| 1                                                   | -0.0000031   | 0.000000108  | -0.000001186                       |
| 1                                                   | -0.000002772 | -0.000001004 | -0.000002269                       |
| 17                                                  | -0.000001936 | 0.000000244  | -0.000000241                       |
| <b>Zero-point correction=</b>                       |              |              | <b>1.219324 (Hartree/Particle)</b> |
| <b>Thermal correction to Energy=</b>                |              |              | <b>1.295787</b>                    |
| <b>Thermal correction to Enthalpy=</b>              |              |              | <b>1.296731</b>                    |
| <b>Thermal correction to Gibbs Free Energy=</b>     |              |              | <b>1.098116</b>                    |
| <b>Sum of electronic and zero-point Energies=</b>   |              |              | <b>-4408.199496</b>                |
| <b>Sum of electronic and thermal Energies=</b>      |              |              | <b>-4408.123033</b>                |
| <b>Sum of electronic and thermal Enthalpies=</b>    |              |              | <b>-4408.122089</b>                |
| <b>Sum of electronic and thermal Free Energies=</b> |              |              | <b>-4408.320704</b>                |

E-2b

|    |              |              |              |
|----|--------------|--------------|--------------|
| 6  | -0.000001103 | -0.000000001 | -0.000000792 |
| 6  | 0.000000949  | -0.000000068 | 0.000000605  |
| 7  | -0.000000104 | -0.000000075 | 0.000000087  |
| 7  | 0.000000699  | 0.000001355  | 0.000000185  |
| 16 | 0.000000964  | 0.000000997  | -0.00000246  |
| 8  | 0.000000079  | 0.000001417  | -0.00000003  |
| 8  | -0.000000854 | 0.000001505  | -0.000000244 |
| 6  | -0.000000225 | 0.00000287   | 0.000001402  |
| 6  | 0.000000083  | 0.000002305  | 0.00000014   |
| 6  | 0.000001022  | 0.000002184  | 0.000001255  |
| 6  | -0.000000407 | 0.000001401  | 0.000001083  |
| 6  | 0.000000278  | 0.000001863  | -0.000000507 |
| 6  | 0.000000812  | 0.00000124   | 0.00000058   |
| 1  | 0.000000471  | 0.000001893  | 0.000000328  |
| 1  | 0.000000892  | 0.000001897  | 0.000000672  |
| 1  | 0.000000707  | 0.000001997  | 0.000000111  |
| 1  | 0.000000219  | 0.000001816  | -0.000000288 |
| 6  | 0.000000814  | 0.000003093  | 0.000002458  |
| 1  | 0.000001501  | 0.000002009  | 0.000000505  |
| 1  | 0.000001524  | 0.000002382  | 0.000001787  |
| 1  | 0.000000189  | 0.000002875  | 0.000001155  |

|    |              |              |              |
|----|--------------|--------------|--------------|
| 6  | -0.00000062  | -0.00000079  | -0.000000499 |
| 1  | 0.000000135  | 0.000000493  | -0.000000214 |
| 1  | -0.000000305 | 0.000000958  | -0.000000128 |
| 16 | 0.00000068   | 0.000000876  | 0.00000035   |
| 8  | 0.000000525  | -0.000001252 | -0.00000116  |
| 8  | 0.000000094  | -0.000001153 | -0.00000031  |
| 6  | -0.000000003 | -0.000000192 | 0.000000923  |
| 6  | 0.000000214  | -0.000000396 | 0.000000767  |
| 6  | 0.000000362  | -0.000000671 | 0.000000816  |
| 6  | 0.000000428  | 0.000000081  | 0.000000489  |
| 1  | 0.000000324  | -0.000000063 | 0.000000388  |
| 6  | 0.000000641  | -0.000000721 | 0.000001827  |
| 1  | 0.000000633  | -0.000000832 | 0.000001314  |
| 6  | 0.000000706  | -0.000000285 | 0.000000619  |
| 1  | 0.000000362  | -0.000000082 | 0.000000731  |
| 1  | 0.000000733  | -0.000000086 | 0.000001712  |
| 6  | 0.000000828  | -0.000000359 | 0.000001625  |
| 1  | 0.000000496  | -0.000000787 | 0.00000149   |
| 1  | 0.000000774  | -0.000000162 | 0.000001425  |
| 1  | 0.000000894  | -0.000000682 | 0.000001635  |
| 6  | -0.000000033 | 0.000000851  | 0.000001218  |
| 6  | 0.000000512  | 0.000000036  | 0.00000117   |
| 6  | 0.000000457  | 0.000000627  | 0.000000894  |
| 1  | 0.000000271  | 0.000000559  | 0.000000737  |
| 6  | 0.000000678  | 0.000000801  | 0.000000817  |
| 1  | 0.000000662  | -0.000000321 | 0.000001173  |
| 1  | 0.000000465  | 0.000000141  | 0.000000719  |
| 6  | 0.000000939  | 0.000001193  | 0.000000977  |
| 1  | 0.000000557  | 0.000000402  | 0.000000922  |
| 1  | 0.000000714  | 0.000000834  | 0.000000423  |
| 6  | 0.000001002  | 0.000000537  | 0.000001785  |
| 1  | 0.000000485  | 0.000000013  | 0.000001567  |
| 1  | 0.000000686  | 0.000000573  | 0.000001225  |
| 1  | 0.000000871  | 0.000000948  | 0.000001358  |
| 1  | 0.000000099  | 0.000001385  | 0.000001956  |
| 1  | 0.000001091  | 0.000000906  | 0.00000181   |
| 1  | 0.000001065  | 0.000000252  | 0.0000017    |
| 6  | 0.000000032  | 0.000000515  | -0.000001059 |
| 6  | -0.000000668 | -0.000000093 | -0.000000628 |
| 6  | -0.000000037 | 0.000001318  | -0.000001341 |
| 6  | -0.000000064 | 0.000000219  | -0.000001337 |
| 1  | -0.000000781 | 0.000000091  | -0.000000527 |
| 6  | -0.000001043 | 0.000000409  | -0.000001444 |
| 1  | -0.000000728 | 0.000001459  | -0.000001017 |

|    |              |              |              |
|----|--------------|--------------|--------------|
| 6  | -0.000000746 | 0.000000231  | -0.000001783 |
| 1  | -0.000000783 | -0.000000455 | -0.00000126  |
| 1  | -0.000000915 | 0.000001068  | -0.00000166  |
| 1  | -0.000001076 | 0.000000236  | -0.000001729 |
| 79 | -0.000001023 | -0.000001277 | 0.000000634  |
| 6  | -0.000000137 | -0.000000067 | 0.000000592  |
| 6  | 0.000000173  | -0.000001171 | 0.000000219  |
| 6  | -0.000000818 | -0.000001026 | -0.000000047 |
| 1  | -0.000000441 | -0.000001361 | -0.000000648 |
| 1  | 0.000000095  | -0.00000126  | -0.000000009 |
| 7  | 0.000000262  | -0.000000541 | 0.000000272  |
| 7  | -0.000000083 | -0.000000623 | -0.000001632 |
| 6  | -0.00000032  | -0.000000621 | 0.000000159  |
| 6  | 0.000000201  | -0.000000734 | 0.000001214  |
| 6  | 0.000000239  | 0.00000029   | 0.000000245  |
| 6  | 0.00000067   | -0.000000435 | 0.000000967  |
| 6  | 0.000000991  | -0.000000145 | 0.00000091   |
| 6  | 0.000000628  | -0.000000052 | 0.000001082  |
| 1  | 0.00000089   | -0.000000591 | 0.000001506  |
| 1  | 0.000000496  | 0.000000435  | 0.000000989  |
| 1  | 0.000000982  | 0.000000096  | 0.000001582  |
| 6  | -0.00000157  | -0.000001055 | -0.000001213 |
| 6  | 0.000000309  | -0.000000552 | -0.000000914 |
| 6  | -0.000000029 | -0.000001892 | -0.000000371 |
| 6  | -0.000001221 | -0.000001133 | -0.000001297 |
| 6  | -0.000000857 | -0.000000819 | -0.000001356 |
| 6  | -0.000001269 | -0.000001397 | -0.000002077 |
| 1  | -0.000001231 | -0.000000691 | -0.000001921 |
| 1  | -0.000000856 | -0.00000166  | -0.000001161 |
| 1  | -0.000001111 | -0.000001387 | -0.000001873 |
| 6  | -0.000000738 | -0.000000595 | -0.000001153 |
| 6  | -0.000000897 | -0.00000046  | -0.000001481 |
| 6  | -0.000000986 | 0.000000285  | -0.000001587 |
| 1  | -0.000000432 | -0.000000627 | -0.000000891 |
| 1  | -0.000000893 | -0.000000977 | -0.000001523 |
| 1  | -0.000000929 | -0.000000352 | -0.000001533 |
| 1  | -0.00000102  | -0.000000686 | -0.000002042 |
| 1  | -0.000000742 | 0.000000057  | -0.000001143 |
| 1  | -0.000000822 | 0.000000107  | -0.000001561 |
| 1  | -0.00000078  | 0.000000243  | -0.000001407 |
| 6  | -0.000000324 | -0.000001341 | -0.000000901 |
| 6  | -0.000000301 | -0.000002034 | -0.000000162 |
| 6  | -0.000000355 | -0.000002405 | -0.000000274 |
| 1  | -0.00000014  | -0.000001496 | -0.000000107 |



|    |              |              |              |
|----|--------------|--------------|--------------|
| 1  | -0.0000004   | -0.000001313 | -0.000000319 |
| 1  | -0.000000223 | -0.000001691 | 0.000000036  |
| 1  | -0.000000495 | -0.00000194  | -0.000000777 |
| 1  | -0.000000584 | -0.000002182 | -0.000000524 |
| 1  | -0.000000525 | -0.000002268 | -0.000000703 |
| 1  | -0.000000303 | -0.000002439 | -0.000000195 |
| 6  | 0.000000237  | 0.000000289  | 0.000000286  |
| 6  | 0.000000025  | 0.000000755  | 0.000000036  |
| 6  | 0.000000079  | 0.000000315  | -0.000000026 |
| 1  | -0.000000182 | -0.000000163 | -0.000000536 |
| 1  | 0.000000213  | 0.000000498  | 0.000000032  |
| 1  | 0.000000031  | 0.000000959  | -0.000000222 |
| 1  | 0.000000114  | 0.00000085   | 0.000000208  |
| 1  | 0.000000088  | -0.000000074 | 0.000000125  |
| 1  | -0.000000031 | 0.000000582  | 0.000000472  |
| 1  | 0.000000059  | 0.000000411  | -0.000000019 |
| 6  | 0.000000652  | -0.000001174 | 0.000000789  |
| 6  | 0.000000479  | -0.00000181  | 0.000001302  |
| 6  | 0.000000252  | -0.000001243 | 0.000001168  |
| 1  | 0.000000112  | -0.000001428 | 0.000000527  |
| 1  | 0.000000485  | -0.000001664 | 0.000000889  |
| 1  | 0.000000417  | -0.000001971 | 0.00000108   |
| 1  | 0.000000544  | -0.000001507 | 0.000001249  |
| 1  | 0.000000596  | -0.000001099 | 0.00000098   |
| 1  | 0.000000816  | -0.000001388 | 0.000001656  |
| 1  | 0.000000499  | -0.000001687 | 0.000001156  |
| 6  | -0.000000723 | 0.000001268  | -0.000000556 |
| 6  | -0.000000599 | 0.000001554  | -0.000001614 |
| 6  | -0.000001155 | 0.000000842  | -0.000001975 |
| 6  | -0.000000582 | 0.000000234  | -0.000001908 |
| 6  | -0.000001298 | 0.000000404  | -0.000000866 |
| 1  | -0.000001103 | 0.000000921  | -0.000002136 |
| 1  | -0.000000282 | 0.000001438  | -0.000001471 |
| 7  | -0.00000062  | 0.000000637  | -0.000001391 |
| 8  | -0.00000119  | 0.000001314  | -0.000001223 |
| 1  | -0.00000095  | 0.000000014  | -0.000001968 |
| 1  | -0.000000781 | 0.000001605  | -0.00000185  |
| 17 | 0.000000071  | -0.000000862 | -0.000000913 |

Zero-point correction=

1.221536 (Hartree/Particle)

Thermal correction to Energy=

1.296970

Thermal correction to Enthalpy=

1.297915

Thermal correction to Gibbs Free Energy=

1.101270

Sum of electronic and zero-point Energies=

-4408.219677

Sum of electronic and thermal Energies=

-4408.144243

Sum of electronic and thermal Enthalpies= -4408.143298  
 Sum of electronic and thermal Free Energies= -4408.339943

E-TS2a

|    |              |              |              |
|----|--------------|--------------|--------------|
| 6  | 0.000001047  | 0.00000175   | 0.000001519  |
| 6  | -0.000000424 | 0.000000024  | -0.000000141 |
| 7  | -0.000000283 | 0.000001263  | 0.000000056  |
| 7  | 0.000003121  | 0.00000078   | 0.000001436  |
| 16 | -0.000002873 | -0.000000987 | -0.000000585 |
| 8  | 0.00000038   | 0.000001766  | 0.000000641  |
| 8  | -0.000000834 | 0.000001216  | 0.000000182  |
| 6  | -0.000000405 | 0.000001124  | 0.000000064  |
| 6  | -0.000000784 | 0.000001761  | 0.000000572  |
| 6  | -0.000001399 | 0.000002179  | 0.000000725  |
| 6  | -0.000000979 | 0.000002327  | 0.000000123  |
| 6  | -0.000000894 | 0.00000217   | 0.000001143  |
| 6  | -0.000000187 | 0.000001726  | 0.000000979  |
| 1  | -0.000001392 | 0.000001827  | -0.000000175 |
| 1  | -0.000001392 | 0.000002159  | 0.000000839  |
| 1  | -0.00000083  | 0.00000231   | 0.000001057  |
| 1  | -0.000001118 | 0.000001051  | 0.000001217  |
| 6  | -0.000001027 | 0.000002752  | 0.000000148  |
| 1  | -0.000001101 | 0.000002957  | 0.000001318  |
| 1  | -0.000001686 | 0.000002909  | 0.000001086  |
| 1  | -0.000001204 | 0.000002816  | 0.000000136  |
| 6  | 0.000000417  | 0.000000913  | -0.000000154 |
| 1  | 0.000000333  | 0.000000126  | 0.000000065  |
| 1  | -0.000000129 | 0.00000043   | -0.000000397 |
| 16 | -0.000000106 | -0.000000102 | 0.000000307  |
| 8  | 0.000000224  | 0.000000107  | -0.000000189 |
| 8  | 0.000001438  | -0.000000123 | -0.000000998 |
| 6  | 0.000001908  | -0.000000058 | 0.000000847  |
| 6  | -0.000000175 | 0.000000392  | 0.000000334  |
| 6  | 0.000000674  | 0.000001357  | 0.000000128  |
| 6  | 0.000000087  | 0.000000973  | 0.000001216  |
| 1  | -0.000000244 | 0.000000941  | -0.000000225 |
| 6  | 0.000000645  | 0.000000923  | 0.000000522  |
| 1  | 0.000000829  | 0.000000873  | 0.000000532  |
| 6  | -0.000000134 | 0.000001564  | 0.000000888  |
| 1  | -0.000000452 | 0.000001251  | 0.000000635  |
| 1  | 0.000000823  | 0.000001366  | 0.000001004  |
| 6  | 0.000000683  | 0.000001522  | 0.000001161  |
| 1  | 0.000000265  | 0.000002126  | 0.000001243  |
| 1  | 0.000000131  | 0.000001638  | 0.000001098  |

|    |              |              |              |
|----|--------------|--------------|--------------|
| 1  | -0.000000192 | 0.000001851  | 0.000001101  |
| 6  | 0.000000078  | -0.000000664 | -0.000000282 |
| 6  | 0.000001475  | 0.000000667  | -0.000000056 |
| 6  | 0.000000075  | -0.000000313 | -0.000001431 |
| 1  | 0.000001185  | 0.000000132  | 0.000000547  |
| 6  | 0.000002621  | 0.00000002   | 0.000001935  |
| 1  | 0.000001069  | -0.000000026 | -0.000000087 |
| 1  | 0.000001725  | 0.000000788  | 0.000001248  |
| 6  | 0.000001977  | -0.000000913 | 0.000001356  |
| 1  | 0.00000153   | -0.000001005 | 0.000000511  |
| 1  | -0.000000081 | 0.000000133  | 0.000000054  |
| 6  | 0.000002284  | -0.000000792 | -0.000000203 |
| 1  | 0.000002085  | 0.000000264  | 0.000000713  |
| 1  | 0.000002367  | 0.000000222  | 0.000000469  |
| 1  | 0.000002843  | -0.00000111  | 0.000000311  |
| 1  | 0.00000235   | -0.000000365 | 0.000000531  |
| 1  | 0.000002324  | -0.000000512 | 0.000000235  |
| 1  | 0.000001951  | -0.00000047  | 0.000000224  |
| 6  | -0.000001075 | 0.000000085  | 0.000001922  |
| 6  | -0.000000172 | 0.000001179  | 0.000000599  |
| 6  | -0.000000793 | 0.000000514  | 0.00000007   |
| 6  | -0.000000288 | 0.000001359  | 0.00000049   |
| 1  | -0.000000009 | 0.000001065  | 0.000000349  |
| 6  | -0.000000874 | 0.00000077   | 0.000000503  |
| 1  | -0.000000716 | 0.000000646  | -0.000000623 |
| 6  | -0.000000844 | 0.000001459  | 0.00000032   |
| 1  | -0.000000218 | 0.000001497  | 0.000000894  |
| 1  | -0.000001388 | 0.000000786  | 0.000000083  |
| 1  | -0.000001027 | 0.000001338  | 0.000000501  |
| 79 | -0.000000879 | -0.000001377 | 0.000000234  |
| 6  | 0.000000086  | -0.00000426  | -0.000001043 |
| 6  | -0.000000573 | -0.000000875 | -0.000001516 |
| 6  | -0.000000163 | -0.000001578 | -0.000000829 |
| 1  | -0.000000258 | -0.000002184 | -0.000000987 |
| 1  | -0.000001018 | -0.000001758 | -0.000001141 |
| 7  | -0.000002134 | -0.000000679 | -0.000000659 |
| 7  | 0.000000292  | -0.000001723 | -0.000000984 |
| 6  | -0.000000515 | 0.000000532  | -0.000000492 |
| 6  | -0.000001599 | -0.000001387 | -0.000000365 |
| 6  | -0.000000995 | -0.000001165 | 0.000000642  |
| 6  | -0.00000128  | -0.000000098 | -0.000001061 |
| 6  | -0.000001971 | 0.000000414  | -0.000000535 |
| 6  | -0.000001998 | -0.000000738 | -0.000001224 |
| 1  | -0.000001788 | -0.000000791 | -0.000000671 |

|   |              |              |              |
|---|--------------|--------------|--------------|
| 1 | -0.000002101 | 0.000000144  | -0.00000054  |
| 1 | -0.000002229 | 0.000000126  | -0.000000523 |
| 6 | 0.000000826  | -0.000002226 | -0.000001626 |
| 6 | 0.000000581  | -0.000001527 | 0.00000063   |
| 6 | 0.000000331  | -0.000000541 | -0.00000019  |
| 6 | 0.000001078  | -0.000002369 | -0.000001424 |
| 6 | 0.000000666  | -0.000001635 | -0.000000772 |
| 6 | 0.000001083  | -0.000001483 | -0.00000098  |
| 1 | 0.000001304  | -0.000001607 | -0.00000065  |
| 1 | 0.00000186   | -0.000002121 | -0.000000599 |
| 1 | 0.000001794  | -0.000001912 | -0.000000626 |
| 6 | -0.000000247 | -0.00000077  | -0.000000509 |
| 6 | -0.000000408 | -0.000001705 | -0.000000935 |
| 6 | 0.000000655  | -0.000001548 | -0.000000562 |
| 1 | -0.000000247 | -0.000001263 | -0.000001393 |
| 1 | 0.000000199  | -0.000002188 | -0.000001443 |
| 1 | 0.000000014  | -0.000001902 | -0.00000112  |
| 1 | 0.000000358  | -0.000002208 | -0.000001102 |
| 1 | 0.000000207  | -0.000001265 | -0.000000082 |
| 1 | 0.000000743  | -0.000001315 | -0.000000499 |
| 1 | 0.000000345  | -0.000001123 | -0.000000484 |
| 6 | 0.000000822  | -0.000002038 | 0.000000204  |
| 6 | 0.000000541  | -0.000001215 | -0.000000918 |
| 6 | 0.000000653  | -0.000001912 | -0.000000612 |
| 1 | -0.000000222 | -0.000000318 | -0.000001072 |
| 1 | 0.000000941  | -0.000001151 | -0.000000526 |
| 1 | 0.000000754  | -0.000001305 | -0.00000054  |
| 1 | 0.000001228  | -0.000001521 | -0.000000284 |
| 1 | 0.000000467  | -0.000002443 | -0.000001153 |
| 1 | 0.000000772  | -0.000001975 | -0.000001299 |
| 1 | 0.000000642  | -0.000002095 | -0.000001155 |
| 6 | -0.000002291 | -0.000000963 | -0.000001069 |
| 6 | -0.000000782 | -0.000000285 | 0.000000181  |
| 6 | -0.000001854 | -0.000000692 | -0.000001002 |
| 1 | 0.000000387  | 0.000000072  | -0.000000955 |
| 1 | -0.000001105 | -0.000000115 | -0.000000703 |
| 1 | -0.000001121 | -0.000000105 | -0.000000651 |
| 1 | -0.000002077 | -0.000000137 | -0.00000049  |
| 1 | -0.000001339 | -0.000001103 | -0.000001168 |
| 1 | -0.000001683 | -0.000000736 | -0.000001016 |
| 1 | -0.000001675 | -0.00000104  | -0.000000698 |
| 6 | 0.00000018   | -0.000001402 | -0.000000977 |
| 6 | -0.000000868 | -0.00000181  | -0.000000695 |
| 6 | -0.000000992 | -0.000000663 | -0.00000122  |

|    |             |             |             |
|----|-------------|-------------|-------------|
| 1  | -0.00000591 | -0.00001185 | -0.00000975 |
| 1  | -0.00001769 | -0.00001412 | -0.00001236 |
| 1  | -0.00001195 | -0.00001176 | -0.00001366 |
| 1  | -0.00001692 | -0.00000827 | -0.00000963 |
| 1  | -0.00001089 | 0.00000709  | 0.00000012  |
| 1  | -0.00000877 | -0.00000676 | -0.00000745 |
| 1  | -0.00000548 | -0.00000711 | -0.00000501 |
| 6  | 0.00000859  | 0.00001914  | 0.00001063  |
| 6  | 0.00001282  | 0.00001041  | 0.00001448  |
| 6  | 0.00000741  | 0.00002094  | 0.00001874  |
| 6  | 0.00001057  | 0.00002013  | 0.00001008  |
| 6  | 0.00000433  | 0.00001824  | 0.00000431  |
| 1  | 0.00000963  | 0.00002228  | 0.00001526  |
| 1  | 0.00000938  | 0.00000118  | 0.00000049  |
| 7  | 0.00000491  | 0.00000752  | 0.00000862  |
| 8  | 0.00001156  | 0.00000109  | -0.00000401 |
| 1  | 0.00000701  | 0.00002252  | 0.00001514  |
| 1  | 0.00001026  | 0.00001526  | 0.00001089  |
| 17 | 0.00000729  | 0.00001806  | 0.0000152   |

Zero-point correction=

1.218813 (Hartree/Particle)

Thermal correction to Energy=

1.295566

Thermal correction to Enthalpy=

1.296510

Thermal correction to Gibbs Free Energy=

1.095172

Sum of electronic and zero-point Energies=

-4408.201058

Sum of electronic and thermal Energies=

-4408.124305

Sum of electronic and thermal Enthalpies=

-4408.123361

Sum of electronic and thermal Free Energies=

-4408.324699

E-2a

|    |             |             |              |
|----|-------------|-------------|--------------|
| 6  | 0.00000107  | -0.00001552 | 0.000004349  |
| 6  | -0.00000825 | 0.00000767  | -0.00001779  |
| 7  | -0.00002247 | 0.00000117  | -0.000003195 |
| 7  | -0.00000535 | -0.00002719 | 0.00001229   |
| 16 | -0.00002655 | -0.00000538 | 0.000003928  |
| 8  | -0.00000093 | -0.00000529 | 0.000002677  |
| 8  | -0.00001491 | -0.00001106 | 0.00001328   |
| 6  | -0.00002427 | -0.00001608 | 0.00001573   |
| 6  | -0.00000531 | 0.00000561  | 0.000000796  |
| 6  | -0.0000339  | -0.00001011 | 0.00001454   |
| 6  | -0.00001354 | -0.00001306 | -0.00000303  |
| 6  | -0.00002845 | -0.00000219 | -0.00000138  |
| 6  | -0.00001935 | -0.00000013 | -0.000000403 |
| 1  | -0.00002027 | -0.00000788 | 0.00001533   |
| 1  | -0.00002288 | -0.00000839 | 0.000000954  |

|    |              |              |              |
|----|--------------|--------------|--------------|
| 1  | -0.000002388 | -0.000000665 | -0.000000683 |
| 1  | -0.000001835 | -0.000000502 | -0.000000183 |
| 6  | -0.000002767 | -0.000000749 | -0.000000554 |
| 1  | -0.00000291  | -0.000000837 | -0.000000061 |
| 1  | -0.000002973 | -0.000001008 | -0.000000692 |
| 1  | -0.000002704 | -0.000000235 | -0.000000946 |
| 6  | -0.000000036 | -0.000000965 | 0.000001536  |
| 1  | 0.000000556  | -0.000000007 | 0.000001114  |
| 1  | -0.000000723 | 0.000000728  | 0.000001169  |
| 16 | 0.000000726  | 0.000001296  | -0.000003296 |
| 8  | -0.000001273 | -0.000000096 | 0.000001084  |
| 8  | 0.000001565  | 0.000001032  | 0.000001042  |
| 6  | 0.000000235  | 0.000000193  | 0.000001557  |
| 6  | -0.000002563 | 0.000000283  | 0.000000306  |
| 6  | 0.000000905  | -0.000001549 | 0.000000409  |
| 6  | -0.000000044 | -0.000002328 | 0.000001362  |
| 1  | -0.000000341 | -0.000000114 | 0.000001267  |
| 6  | -0.000001814 | 0.000000501  | -0.000000248 |
| 1  | 0.000000125  | 0.000000271  | -0.000000405 |
| 6  | 0.000000402  | 0.000001148  | 0.000002085  |
| 1  | -0.000001354 | -0.000000262 | 0.000002122  |
| 1  | 0.000000005  | -0.000000139 | 0.000000431  |
| 6  | -0.000001362 | -0.000000073 | 0.000001673  |
| 1  | -0.000000052 | -0.000000253 | 0.000001413  |
| 1  | -0.000001357 | -0.000000542 | 0.000001238  |
| 1  | -0.000001017 | -0.000000466 | 0.000002095  |
| 6  | 0.00000236   | 0.000000446  | 0.000000695  |
| 6  | 0.000001424  | 0.000000743  | -0.000000468 |
| 6  | 0.00000036   | 0.000000728  | 0.000002247  |
| 1  | 0.000001061  | 0.000000034  | 0.000001759  |
| 6  | 0.00000186   | 0.000000822  | 0.000001463  |
| 1  | 0.0000017    | 0.000000384  | 0.000000371  |
| 1  | 0.000001687  | 0.000000534  | 0.000000303  |
| 6  | 0.000002492  | 0.000000625  | 0.000000415  |
| 1  | 0.000001547  | 0.000000549  | 0.000000598  |
| 1  | 0.000001043  | 0.000000252  | 0.000001168  |
| 6  | 0.00000272   | 0.000000652  | 0.000001424  |
| 1  | 0.000002827  | 0.000000787  | 0.000000301  |
| 1  | 0.000002388  | 0.000000511  | 0.000001143  |
| 1  | 0.00000214   | 0.000000476  | 0.000001734  |
| 1  | 0.000002039  | 0.000000362  | 0.000002261  |
| 1  | 0.0000032    | 0.000000773  | 0.000001266  |
| 1  | 0.000002607  | 0.000000073  | 0.000000563  |
| 6  | -0.000000645 | 0.000000863  | 0.000000485  |

|    |             |             |             |
|----|-------------|-------------|-------------|
| 6  | 0.00000606  | 0.00000646  | 0.00002007  |
| 6  | -0.00001525 | -0.00001526 | 0.00003096  |
| 6  | 0.00000184  | -0.00000506 | 0.00002626  |
| 1  | 0.00001271  | -0.00000173 | 0.00001665  |
| 6  | 0.00000321  | 0.00000447  | 0.00002752  |
| 1  | -0.00000487 | -0.00000378 | 0.0000203   |
| 6  | 0.00000637  | -0.00000321 | 0.0000424   |
| 1  | 0.00001632  | 0.00000367  | 0.00002731  |
| 1  | -0.00000932 | -0.00000591 | 0.00003407  |
| 1  | 0.00000181  | -0.00000086 | 0.00003176  |
| 79 | 0.00002227  | -0.00000116 | -0.00000434 |
| 6  | -0.00000599 | 0.00001502  | 0.00001785  |
| 6  | 0.00002204  | 0.00000222  | -0.00003656 |
| 6  | 0.00000912  | 0.00001005  | -0.00001195 |
| 1  | -0.00000696 | -0.00000031 | -0.00002881 |
| 1  | 0.00001036  | 0.00001012  | -0.00002249 |
| 7  | 0.00000181  | 0.00000371  | -0.00003528 |
| 7  | -0.00002753 | -0.00000903 | -0.00003622 |
| 6  | 0.00001857  | 0.00002582  | -0.00000672 |
| 6  | 0.00001863  | -0.00001501 | -0.00003836 |
| 6  | 0.00000898  | -0.00000354 | 0.00000052  |
| 6  | 0.0000229   | 0.00000389  | -0.00000426 |
| 6  | 0.00002442  | 0.00000266  | -0.00001505 |
| 6  | 0.00003505  | 0.00002511  | -0.00001062 |
| 1  | 0.00002795  | 0.00000688  | -0.00001952 |
| 1  | 0.00002745  | 0.00000847  | -0.00000043 |
| 1  | 0.00003288  | 0.00000872  | -0.00001111 |
| 6  | -0.00001509 | 0.00001028  | -0.00002362 |
| 6  | -0.0000063  | 0.00000052  | -0.00001072 |
| 6  | -0.00001972 | -0.00001227 | -0.00000052 |
| 6  | -0.00002485 | -0.0000017  | -0.00000229 |
| 6  | -0.00002483 | -0.00001156 | -0.00003154 |
| 6  | -0.00001984 | 0.00000355  | -0.00001893 |
| 1  | -0.00002346 | -0.00000569 | -0.00001173 |
| 1  | -0.00002494 | -0.00000462 | -0.00002393 |
| 1  | -0.00003509 | -0.00000759 | -0.00001725 |
| 6  | -0.00002347 | -0.00000032 | -0.00001558 |
| 6  | -0.00000628 | -0.00000013 | -0.00001677 |
| 6  | -0.00001286 | -0.00000847 | 0.00000736  |
| 1  | -0.00000256 | -0.00000332 | -0.00000723 |
| 1  | -0.00000059 | 0.00000178  | -0.00002071 |
| 1  | -0.00000038 | -0.00000072 | -0.00001282 |
| 1  | -0.00001253 | -0.00000222 | -0.00001733 |
| 1  | -0.00001228 | -0.00000223 | -0.00000377 |

|    |               |               |               |
|----|---------------|---------------|---------------|
| 1  | -0.000002059  | -0.000000369  | -0.000000612  |
| 1  | -0.000000719  | -0.000000117  | -0.000000019  |
| 6  | -0.000000051  | -0.000000415  | -0.0000003399 |
| 6  | -0.000002276  | 0.000000169   | -0.000000148  |
| 6  | -0.000002469  | -0.000000571  | -0.0000003223 |
| 1  | 0.000000276   | -0.000000381  | -0.0000002336 |
| 1  | -0.000001409  | 0.000000355   | -0.0000002183 |
| 1  | -0.000001007  | -0.000000125  | -0.000000268  |
| 1  | -0.000001687  | -0.000000958  | -0.0000002576 |
| 1  | -0.000001062  | -0.000000001  | -0.0000003878 |
| 1  | -0.000001424  | 0.000000101   | -0.0000003499 |
| 1  | -0.000001233  | 0.000000269   | -0.000000378  |
| 6  | 0.00000168    | 0.000000291   | -0.0000000924 |
| 6  | 0.000001994   | 0.000000288   | 0.000000159   |
| 6  | 0.000002058   | 0.000000799   | -0.0000000997 |
| 1  | 0.000000777   | 0.000000422   | -0.0000000632 |
| 1  | 0.000001395   | 0.000000634   | 0.0000000382  |
| 1  | 0.000001667   | 0.000000396   | 0.0000000394  |
| 1  | 0.000002331   | 0.000000645   | 0.000000042   |
| 1  | 0.000001856   | 0.000000063   | -0.0000001739 |
| 1  | 0.000002608   | 0.000000083   | -0.0000000952 |
| 1  | 0.000001747   | 0.000000674   | -0.0000001013 |
| 6  | 0.000000754   | 0.000001913   | -0.0000001485 |
| 6  | 0.000001183   | 0.000001003   | -0.0000003252 |
| 6  | 0.000001847   | -0.000000041  | -0.0000003614 |
| 1  | 0.000001422   | -0.000000012  | -0.0000002472 |
| 1  | 0.000001301   | 0.000000114   | -0.0000003442 |
| 1  | 0.000001203   | 0.000000728   | -0.0000003457 |
| 1  | 0.000002521   | 0.000000865   | -0.0000003384 |
| 1  | 0.00000008    | 0.000000652   | -0.0000000968 |
| 1  | 0.000001218   | 0.000000773   | -0.0000002234 |
| 1  | 0.000000875   | 0.000000052   | -0.0000002467 |
| 6  | -0.000001064  | -0.000001024  | 0.0000003568  |
| 6  | -0.000001218  | -0.000001268  | 0.0000004349  |
| 6  | -0.000000548  | 0.000000006   | 0.0000002952  |
| 6  | 0.000002199   | 0.000000885   | 0.0000004081  |
| 6  | -0.000001187  | -0.0000003079 | 0.000000318   |
| 1  | 0.000000124   | -0.0000000561 | 0.0000004673  |
| 1  | -0.000001176  | -0.000000462  | 0.0000003085  |
| 7  | 0.0000006034  | 0.0000007102  | 0.0000002025  |
| 8  | -0.0000003263 | -0.0000005194 | 0.0000000703  |
| 1  | 0.000000834   | 0.000000003   | 0.0000003545  |
| 1  | -0.000000092  | -0.000000447  | 0.0000003966  |
| 17 | 0.000001015   | 0.000000287   | 0.0000002342  |



|                                              |                             |
|----------------------------------------------|-----------------------------|
| Zero-point correction=                       | 1.220603 (Hartree/Particle) |
| Thermal correction to Energy=                | 1.297153                    |
| Thermal correction to Enthalpy=              | 1.298097                    |
| Thermal correction to Gibbs Free Energy=     | 1.098468                    |
| Sum of electronic and zero-point Energies=   | -4408.211239                |
| Sum of electronic and thermal Energies=      | -4408.134689                |
| Sum of electronic and thermal Enthalpies=    | -4408.133745                |
| Sum of electronic and thermal Free Energies= | -4408.333374                |

Re7

|    |              |              |              |
|----|--------------|--------------|--------------|
| 6  | -0.000000033 | -0.000001222 | 0.000001457  |
| 6  | 0.000003078  | -0.00000014  | -0.000003193 |
| 7  | -0.000001816 | 0.000004741  | -0.000001474 |
| 7  | -0.000008332 | -0.000004722 | -0.000002133 |
| 16 | -0.000000517 | -0.000001221 | -0.000002384 |
| 8  | -0.000001173 | 0.000000454  | 0.000000559  |
| 8  | 0.000001369  | -0.000000132 | -0.000000255 |
| 6  | 0.000005283  | 0.000003859  | -0.000003761 |
| 6  | -0.000000754 | 0.000002342  | 0.000003257  |
| 6  | -0.000003596 | -0.000000471 | -0.000002097 |
| 6  | 0.000006835  | 0.000004477  | -0.000006595 |
| 6  | -0.000000889 | 0.000002209  | 0.000003131  |
| 6  | -0.000004076 | -0.000003198 | -0.000002865 |
| 1  | 0.000000083  | 0.000001448  | -0.000001504 |
| 1  | -0.000000021 | 0.000002167  | -0.000001198 |
| 1  | 0.000000298  | 0.000000483  | -0.000001587 |
| 1  | 0.000001276  | 0.000000389  | -0.000000094 |
| 6  | 0.000000961  | 0.000001753  | -0.000002909 |
| 1  | -0.000000649 | 0.000001786  | -0.000001454 |
| 1  | -0.000000534 | 0.000002889  | -0.000000819 |
| 1  | -0.000000902 | 0.000001467  | -0.000000877 |
| 6  | -0.000001108 | -0.000002578 | 0.000001515  |
| 1  | 0.000000432  | 0.000001362  | 0.000000431  |
| 1  | -0.000000591 | 0.000001113  | 0.000000059  |
| 16 | 0.000007203  | 0.000003039  | 0.000001148  |
| 8  | 0.000000015  | -0.000001408 | -0.000000151 |
| 8  | 0.000000382  | -0.000001493 | 0.000000095  |
| 6  | 0.000001732  | -0.000000632 | -0.000001373 |
| 6  | -0.000000419 | -0.00000132  | 0.000001487  |
| 6  | -0.000001007 | 0.000000152  | 0.000000536  |
| 6  | -0.000001489 | 0.000000089  | 0.000001845  |
| 1  | -0.000000056 | -0.000000192 | 0.000000231  |
| 6  | 0.000000035  | -0.000002811 | 0.000000243  |
| 1  | 0.000000428  | -0.000001967 | 0.000000169  |

|   |              |              |              |
|---|--------------|--------------|--------------|
| 6 | 0.000001159  | -0.000000049 | -0.000000572 |
| 1 | -0.000000487 | 0.000000192  | 0.000001003  |
| 1 | 0.000000094  | -0.000001476 | 0.000001013  |
| 6 | -0.000000792 | -0.000000696 | 0.000001841  |
| 1 | -0.000000378 | -0.000001207 | 0.000002103  |
| 1 | -0.000000652 | -0.000000043 | 0.000001783  |
| 1 | -0.000000689 | -0.000000486 | 0.000002074  |
| 6 | 0.000000759  | 0.000000361  | 0.000002239  |
| 1 | -0.000000088 | -0.000002794 | -0.000000043 |
| 6 | -0.000000289 | 0.000002537  | 0.000001927  |
| 6 | 0.000000173  | 0            | 0.000001526  |
| 6 | -0.000000868 | -0.000000186 | -0.000000785 |
| 6 | -0.00000168  | 0.000000084  | 0.000000903  |
| 1 | -0.000000698 | 0.000000056  | 0.000001041  |
| 6 | -0.000000599 | 0.000000484  | 0.000000563  |
| 1 | -0.000000954 | 0.000002039  | 0.000000495  |
| 6 | -0.000001416 | 0.000001777  | 0.00000188   |
| 1 | -0.000000673 | -0.000000084 | 0.000002041  |
| 1 | -0.000000511 | 0.000001917  | 0.000001019  |
| 1 | -0.000000549 | 0.00000102   | 0.000001838  |
| 6 | 0.000002168  | -0.000002545 | -0.000000919 |
| 1 | -0.000000106 | -0.000002903 | -0.000000469 |
| 1 | -0.00000047  | -0.000001192 | 0.000000516  |
| 1 | 0.000001097  | -0.000002236 | 0.000000904  |
| 6 | 0.00000229   | -0.000001736 | -0.000000171 |
| 1 | 0.00000146   | -0.000002006 | -0.000001685 |
| 1 | 0.000000088  | -0.000001789 | -0.000001372 |
| 1 | 0.000001354  | -0.000002119 | -0.000000116 |

**Zero-point correction=** 0.493373 (Hartree/Particle)  
**Thermal correction to Energy=** 0.527882  
**Thermal correction to Enthalpy=** 0.528826  
**Thermal correction to Gibbs Free Energy=** 0.419792  
**Sum of electronic and zero-point Energies=** -2213.755902  
**Sum of electronic and thermal Energies=** -2213.721393  
**Sum of electronic and thermal Enthalpies=** -2213.720449  
**Sum of electronic and thermal Free Energies=** -2213.829483

F-1

|    |              |              |              |
|----|--------------|--------------|--------------|
| 6  | 0.000025534  | -0.000024165 | -0.000002218 |
| 6  | -0.000017193 | 0.000010552  | 0.000013522  |
| 7  | -0.000000415 | 0.000020603  | -0.000017251 |
| 7  | 0.000021743  | 0.000007493  | -0.000003164 |
| 16 | 0.00001097   | -0.000007478 | 0.000000952  |
| 8  | -0.000005838 | -0.000003424 | -0.000002612 |

|    |              |              |              |
|----|--------------|--------------|--------------|
| 8  | -0.000002362 | 0.000001199  | 0.000002345  |
| 6  | 0.000005634  | 0.000003408  | 0.000001932  |
| 6  | 0.000000972  | -0.000000246 | -0.000001334 |
| 6  | 0.000004109  | 0.000002419  | -0.00000232  |
| 6  | 0.000001642  | -0.000000848 | -0.000002534 |
| 6  | 0.000003732  | -0.000000517 | 0.000000065  |
| 6  | 0.000000425  | 0.000001753  | -0.000001742 |
| 1  | 0.00000267   | 0.000000685  | -0.00000132  |
| 1  | 0.000002737  | 0.00000068   | -0.000001287 |
| 1  | 0.00000293   | -0.000000555 | -0.000000283 |
| 1  | 0.000003605  | -0.000000726 | 0.000001115  |
| 6  | 0.000004072  | 0.000000312  | -0.000000766 |
| 1  | 0.000003772  | -0.000000258 | -0.000000869 |
| 1  | 0.00000381   | 0.000000768  | -0.000001255 |
| 1  | 0.000003923  | -0.000000083 | -0.000001164 |
| 6  | 0.000000339  | -0.000005057 | -0.000001216 |
| 1  | -0.000000936 | 0.000001632  | -0.000000395 |
| 1  | 0.000000047  | 0.000001438  | -0.000001179 |
| 16 | -0.000014672 | 0.000002421  | 0.000000611  |
| 8  | -0.000001495 | -0.000000808 | 0.000002173  |
| 8  | 0.000000905  | 0.000000362  | 0.000001572  |
| 6  | 0.000004002  | -0.000005323 | 0.000003756  |
| 6  | 0.000001659  | -0.000001799 | -0.000004065 |
| 6  | -0.000000746 | -0.000001302 | 0.00000128   |
| 6  | 0.000000019  | -0.000003466 | 0.000000238  |
| 1  | 0.000002056  | 0.000000234  | 0.000002157  |
| 6  | 0.000001967  | -0.000003794 | -0.000001075 |
| 1  | 0.000001005  | -0.000001654 | 0.000000542  |
| 6  | 0.000002693  | 0.000004837  | 0.000006793  |
| 1  | 0.000002041  | -0.000001444 | 0.000000843  |
| 1  | 0.000002099  | -0.000000415 | -0.000000317 |
| 6  | 0.000004168  | -0.000002235 | 0.000002553  |
| 1  | 0.000001782  | -0.000001809 | 0.000000201  |
| 1  | 0.000002378  | -0.00000027  | 0.000000324  |
| 1  | 0.000002404  | -0.000001311 | -0.00000041  |
| 6  | -0.000009057 | -0.000007128 | -0.000004537 |
| 1  | 0.000000135  | 0.000001415  | -0.00000081  |
| 6  | 0.000000225  | 0.000000012  | -0.000001916 |
| 6  | -0.000001333 | -0.000001325 | -0.000000256 |
| 6  | 0.000001817  | 0.000003062  | 0.000000033  |
| 6  | 0.000000903  | 0.000002664  | -0.000000033 |
| 1  | 0.000003011  | -0.000000929 | 0.000000281  |
| 6  | 0.000000177  | -0.000000864 | -0.000001843 |
| 1  | 0.000000878  | 0.000001284  | -0.000001123 |

|    |              |              |              |
|----|--------------|--------------|--------------|
| 6  | 0.000004407  | 0.000000235  | -0.000000699 |
| 1  | 0.000001828  | -0.000000751 | -0.000000442 |
| 1  | 0.000002153  | 0.000000947  | -0.000001271 |
| 1  | 0.0000018    | 0.00000018   | -0.000000609 |
| 6  | 0.000000846  | 0.000001194  | 0.000001672  |
| 1  | -0.000001732 | -0.000000388 | 0.000000344  |
| 1  | -0.000001066 | -0.000000694 | 0.000000332  |
| 1  | -0.000001148 | -0.000000479 | 0.000000843  |
| 6  | 0.000002944  | -0.000002151 | 0.00000201   |
| 1  | -0.000000418 | 0.000000553  | -0.000000035 |
| 1  | -0.000002556 | 0.000000321  | 0.000001155  |
| 1  | -0.000001409 | 0.000000346  | -0.000000114 |
| 79 | -0.000006948 | 0.00000295   | -0.000001741 |
| 6  | -0.000002987 | -0.000001683 | -0.00000287  |
| 6  | -0.000006403 | 0.000005936  | -0.000000083 |
| 6  | -0.000001657 | -0.000003465 | -0.000006171 |
| 1  | -0.000002952 | 0.000001653  | 0.000001729  |
| 1  | -0.00000049  | -0.000001267 | 0.000000612  |
| 7  | 0.000002047  | -0.000001504 | 0.000002007  |
| 7  | 0.000002766  | -0.000000851 | 0.000005108  |
| 6  | 0.000000964  | 0.000002813  | 0.00000217   |
| 6  | -0.000000311 | -0.000000237 | -0.000001771 |
| 6  | -0.000001342 | -0.000000733 | -0.000002028 |
| 6  | 0.000000649  | 0.000000371  | 0.000000901  |
| 6  | -0.000000449 | -0.000000255 | -0.000000381 |
| 6  | -0.000000169 | -0.000000624 | -0.000000434 |
| 1  | 0.000000395  | -0.00000113  | 0.000001311  |
| 1  | 0.000000739  | -0.000000262 | -0.000000494 |
| 1  | 0.00000096   | -0.000000615 | 0.000000513  |
| 6  | -0.000002299 | 0.000000176  | 0.000000634  |
| 6  | 0.000000358  | 0.000002053  | 0.000001198  |
| 6  | -0.000002148 | 0.000001084  | 0.000000722  |
| 6  | -0.000002453 | 0.000000801  | -0.000000042 |
| 6  | -0.000002826 | 0.000000378  | 0.000000945  |
| 6  | -0.000003126 | 0.000000897  | -0.000000596 |
| 1  | -0.000002491 | 0.000001414  | -0.000001473 |
| 1  | -0.000002278 | -0.000000073 | 0.000000674  |
| 1  | -0.000002674 | 0.000000733  | 0.000000042  |
| 6  | 0.000000365  | 0.000000478  | -0.000001458 |
| 6  | -0.000003767 | 0.000000702  | 0.000000797  |
| 6  | -0.000003314 | 0.000000293  | -0.000001724 |
| 1  | -0.0000018   | 0.000001793  | 0.000000797  |
| 1  | -0.000002632 | 0.000001537  | -0.000000769 |
| 1  | -0.000002219 | 0.000001791  | -0.000001315 |

|                                                     |              |              |                                    |
|-----------------------------------------------------|--------------|--------------|------------------------------------|
| 1                                                   | -0.000001999 | 0.000002343  | -0.000001787                       |
| 1                                                   | -0.000001629 | 0.000001644  | -0.00000379                        |
| 1                                                   | -0.000000548 | 0.000001126  | -0.000001098                       |
| 1                                                   | -0.000000824 | 0.000002156  | -0.000000942                       |
| 6                                                   | -0.000002144 | -0.000000803 | -0.000000725                       |
| 6                                                   | -0.000003649 | -0.00000011  | 0.000003236                        |
| 6                                                   | -0.000001689 | -0.000001389 | 0.000001536                        |
| 1                                                   | -0.000002777 | -0.000000306 | 0.000000295                        |
| 1                                                   | -0.000001446 | -0.000002367 | 0.000002088                        |
| 1                                                   | -0.000001852 | -0.000000932 | 0.000001472                        |
| 1                                                   | -0.000001661 | -0.000000635 | 0.000000882                        |
| 1                                                   | -0.000003053 | -0.000000194 | 0.000001106                        |
| 1                                                   | -0.00000355  | -0.000000033 | 0.000000084                        |
| 1                                                   | -0.000002757 | -0.000000649 | 0.000001746                        |
| 6                                                   | -0.000001976 | 0.000001025  | -0.000002165                       |
| 6                                                   | 0.000001085  | 0.000000057  | -0.000000625                       |
| 6                                                   | -0.000000023 | 0.000001333  | 0.000001927                        |
| 1                                                   | -0.000001715 | 0.000000484  | -0.000001026                       |
| 1                                                   | -0.000000571 | 0.00000238   | -0.000001462                       |
| 1                                                   | 0.000000001  | 0.000001463  | -0.000001361                       |
| 1                                                   | -0.000001112 | 0.000001372  | -0.000001025                       |
| 1                                                   | -0.000001544 | 0.000000553  | -0.000000837                       |
| 1                                                   | -0.000000587 | 0.000000823  | -0.000001456                       |
| 1                                                   | -0.000001089 | 0.000001109  | -0.000001049                       |
| 6                                                   | 0.00000107   | -0.000002645 | 0.000002289                        |
| 6                                                   | -0.000002668 | -0.000001001 | -0.000000648                       |
| 6                                                   | -0.000001573 | -0.000001456 | 0.000000037                        |
| 1                                                   | 0.000000026  | -0.00000029  | 0.000002692                        |
| 1                                                   | -0.000001223 | -0.000001157 | 0.000001405                        |
| 1                                                   | -0.000001214 | -0.000001313 | 0.000001016                        |
| 1                                                   | 0.000000467  | -0.00000154  | 0.000001961                        |
| 1                                                   | 0.000000146  | -0.000001242 | 0.000000666                        |
| 1                                                   | 0.000000478  | -0.000000379 | 0.000001759                        |
| 1                                                   | -0.000000507 | -0.000001461 | 0.000000092                        |
| <b>Zero-point correction=</b>                       |              |              | <b>1.067712 (Hartree/Particle)</b> |
| <b>Thermal correction to Energy=</b>                |              |              | <b>1.136083</b>                    |
| <b>Thermal correction to Enthalpy=</b>              |              |              | <b>1.137027</b>                    |
| <b>Thermal correction to Gibbs Free Energy=</b>     |              |              | <b>0.952107</b>                    |
| <b>Sum of electronic and zero-point Energies=</b>   |              |              | <b>-3508.607700</b>                |
| <b>Sum of electronic and thermal Energies=</b>      |              |              | <b>-3508.539329</b>                |
| <b>Sum of electronic and thermal Enthalpies=</b>    |              |              | <b>-3508.538385</b>                |
| <b>Sum of electronic and thermal Free Energies=</b> |              |              | <b>-3508.723305</b>                |

F-2

|    |              |              |              |
|----|--------------|--------------|--------------|
| 6  | -0.000003291 | 0.000001799  | 0.000002469  |
| 6  | 0.00000211   | -0.000003282 | -0.00000028  |
| 7  | 0.000001501  | 0.000000662  | -0.000000401 |
| 7  | -0.000000267 | 0.000001955  | -0.000002868 |
| 16 | 0.000000356  | 0.000000523  | -0.000000564 |
| 8  | -0.000000451 | 0.000000023  | -0.000000833 |
| 8  | -0.000000104 | -0.000000091 | -0.000000514 |
| 6  | -0.000000268 | 0.000000411  | -0.000000137 |
| 6  | 0.000000416  | -0.000001281 | 0.000000121  |
| 6  | 0.000001122  | 0.00000005   | -0.000000806 |
| 6  | 0.000000145  | 0.000000831  | 0.000000504  |
| 6  | 0.000000034  | -0.000001248 | -0.000000064 |
| 6  | 0.00000007   | 0.00000053   | -0.00000088  |
| 1  | 0.00000017   | 0.000000039  | -0.00000031  |
| 1  | 0.000000241  | 0.000000085  | -0.000000277 |
| 1  | 0.000000563  | 0.00000016   | -0.00000009  |
| 1  | 0.000000535  | 0.000000096  | 0.000000094  |
| 6  | 0.000000462  | 0.000000439  | 0.000000095  |
| 1  | 0.000000893  | -0.000000535 | -0.000001047 |
| 1  | -0.000000082 | -0.000000172 | -0.000000212 |
| 1  | 0.00000106   | 0.000000411  | -0.000000102 |
| 6  | -0.000000099 | 0.000000606  | 0.000000007  |
| 1  | 0.000000289  | -0.000000333 | -0.000000255 |
| 1  | 0.000000112  | -0.000000436 | 0.000000224  |
| 16 | 0.00000011   | -0.000002161 | 0.000001738  |
| 8  | 0.000000769  | 0.000000366  | 0.000000284  |
| 8  | 0.000000522  | 0.000000649  | 0.000000402  |
| 6  | -0.00000412  | 0.000001865  | 0.00000401   |
| 6  | 0.000007752  | 0.000001588  | 0.000000663  |
| 6  | -0.000001083 | -0.000003431 | -0.000006027 |
| 6  | -0.000001051 | -0.00000355  | -0.00000689  |
| 1  | -0.000000373 | -0.000000129 | -0.000000405 |
| 6  | 0.000008188  | 0.000001839  | 0.000000209  |
| 1  | 0.000000959  | 0.000000401  | 0.000000741  |
| 6  | -0.000006127 | 0.000003258  | 0.000006762  |
| 1  | 0.000000854  | 0.000000216  | 0.00000039   |
| 1  | 0.0000001    | -0.00000012  | -0.00000004  |
| 6  | 0.000002462  | -0.000001295 | -0.000001855 |
| 1  | 0.00000125   | 0.000000529  | -0.000000003 |
| 1  | 0.000000006  | 0.00000014   | -0.000000586 |
| 1  | 0.000000495  | 0.000000148  | -0.000000166 |
| 6  | 0.000001232  | -0.00000123  | 0.000000168  |
| 1  | -0.000000114 | 0.000000329  | -0.000000045 |
| 6  | -0.000000414 | 0.000001413  | 0.000001783  |

|    |              |              |              |
|----|--------------|--------------|--------------|
| 6  | 0.000000782  | 0.000000031  | -0.00000023  |
| 6  | -0.000000116 | -0.000000681 | 0.000000001  |
| 6  | 0.000000446  | -0.000000093 | 0.000000418  |
| 1  | 0.000000018  | 0.000000014  | 0.000000044  |
| 6  | 0.000000385  | 0.000000321  | -0.000000293 |
| 1  | -0.000000001 | 0.000000026  | 0.000000056  |
| 6  | -0.000000014 | 0.000000335  | 0.000000703  |
| 1  | 0.000000422  | 0.000000215  | 0.000000371  |
| 1  | 0.000000048  | 0.000000048  | 0.000000237  |
| 1  | 0.000000389  | 0.000000043  | 0.000000282  |
| 6  | -0.000000042 | 0.000000297  | 0.000000486  |
| 1  | 0.000000029  | 0.000000154  | 0.000000274  |
| 1  | 0.000000243  | 0.000000152  | 0.000000424  |
| 1  | 0.00000003   | 0.000000014  | 0.000000282  |
| 6  | 0.000000641  | 0.000000079  | 0.000000343  |
| 1  | 0.000000019  | 0.000000005  | -0.000000012 |
| 1  | 0.000000155  | -0.000000013 | 0.000000197  |
| 1  | 0.000000241  | -0.000000008 | 0.000000026  |
| 79 | -0.000000216 | 0.000001382  | 0.000000372  |
| 6  | 0.000000043  | -0.000001338 | -0.000001474 |
| 6  | -0.000000592 | 0.000000324  | 0.000000209  |
| 6  | -0.000000114 | 0.000000397  | -0.000001183 |
| 1  | -0.000000682 | 0.000000124  | 0.000000105  |
| 1  | -0.000000602 | -0.000000225 | 0.000000129  |
| 7  | -0.00000011  | -0.000000083 | -0.000000038 |
| 7  | -0.000000256 | -0.000001839 | 0.000002791  |
| 6  | -0.000001324 | 0.000000498  | 0.000000551  |
| 6  | 0.000000266  | 0.000000163  | 0.000000728  |
| 6  | -0.000000014 | -0.000000847 | -0.000000223 |
| 6  | -0.000000301 | -0.000000322 | -0.000000119 |
| 6  | -0.000000177 | 0.000000031  | -0.000000019 |
| 6  | -0.000000931 | 0.000000046  | 0.000000433  |
| 1  | -0.000000494 | -0.000000177 | 0.000000452  |
| 1  | -0.000000669 | -0.000000181 | -0.000000063 |
| 1  | -0.000000447 | -0.000000114 | 0.000000166  |
| 6  | 0.000000934  | 0.000000713  | -0.000000528 |
| 6  | -0.000000557 | -0.000000016 | -0.000000766 |
| 6  | -0.000000564 | 0.000000275  | -0.000000041 |
| 6  | -0.000000266 | 0.000000137  | -0.000000018 |
| 6  | -0.000000188 | 0.000000025  | -0.000000127 |
| 6  | 0.000000157  | -0.000000131 | 0.000000068  |
| 1  | 0.000000019  | -0.000000115 | -0.000000303 |
| 1  | -0.000000134 | -0.000000022 | 0.000000079  |
| 1  | 0.000000142  | -0.000000013 | -0.000000263 |

|   |              |              |              |
|---|--------------|--------------|--------------|
| 6 | 0.000000131  | 0.000000749  | -0.00000072  |
| 6 | -0.000000407 | -0.000000466 | -0.000000096 |
| 6 | -0.000000067 | -0.000000629 | 0.000000052  |
| 1 | -0.000000481 | -0.000000011 | -0.000000498 |
| 1 | -0.000000315 | -0.000000047 | -0.000000053 |
| 1 | -0.000000333 | -0.000000069 | -0.000000545 |
| 1 | 0.000000076  | -0.000000079 | -0.000000705 |
| 1 | 0.000000011  | -0.000000037 | -0.000000152 |
| 1 | -0.000000127 | 0.000000338  | -0.000000444 |
| 1 | -0.000000193 | -0.000000034 | -0.000000462 |
| 6 | -0.000000209 | 0.000000262  | 0.000000096  |
| 6 | 0.000000156  | -0.000000015 | 0.000000211  |
| 6 | -0.000000242 | -0.000000019 | 0.000000412  |
| 1 | -0.000000345 | 0.000000089  | 0.000000054  |
| 1 | -0.000000055 | 0.000000086  | 0.000000378  |
| 1 | -0.000000189 | 0.000000001  | 0.000000439  |
| 1 | 0.000000065  | 0.000000003  | 0.000000463  |
| 1 | -0.000000434 | -0.000000097 | 0.000000106  |
| 1 | -0.000000423 | 0.000000095  | 0.000000084  |
| 1 | -0.000000043 | -0.000000119 | 0.000000366  |
| 6 | -0.000000425 | 0.000000341  | 0.000000006  |
| 6 | 0.000000201  | -0.000000001 | -0.000000577 |
| 6 | -0.000000412 | -0.000000221 | -0.000000192 |
| 1 | -0.000000353 | -0.000000404 | -0.000000406 |
| 1 | -0.000000803 | -0.000000261 | -0.000000197 |
| 1 | -0.000000498 | -0.000000068 | -0.000000335 |
| 1 | -0.000000553 | 0.000000197  | 0.000000007  |
| 1 | -0.000000692 | -0.000000134 | -0.000000117 |
| 1 | -0.000000751 | -0.000000152 | -0.000000219 |
| 1 | -0.000000676 | -0.000000008 | -0.000000468 |
| 6 | -0.000000544 | -0.000000242 | 0.000000293  |
| 6 | -0.000000615 | -0.000000031 | 0.000000421  |
| 6 | -0.000000056 | -0.000000071 | 0.000000261  |
| 1 | -0.000000021 | 0.000000234  | 0.000000119  |
| 1 | -0.000000585 | -0.000000144 | 0.000000475  |
| 1 | -0.000000527 | -0.000000067 | 0.000000509  |
| 1 | -0.000000772 | 0.000000188  | 0.000000479  |
| 1 | -0.000000336 | -0.000000232 | 0.000000418  |
| 1 | -0.000000307 | -0.000000123 | 0.000000531  |
| 1 | -0.00000003  | 0.000000048  | 0.000000059  |

Zero-point correction=

1.068084 (Hartree/Particle)

Thermal correction to Energy=

1.136250

Thermal correction to Enthalpy=

1.137194

Thermal correction to Gibbs Free Energy=

0.952609



|                                              |              |
|----------------------------------------------|--------------|
| Sum of electronic and zero-point Energies=   | -3508.613038 |
| Sum of electronic and thermal Energies=      | -3508.544872 |
| Sum of electronic and thermal Enthalpies=    | -3508.543928 |
| Sum of electronic and thermal Free Energies= | -3508.728513 |

F-TS1b

|    |              |              |              |
|----|--------------|--------------|--------------|
| 6  | -0.00000699  | -0.00000345  | 0.000001344  |
| 6  | 0.00000513   | -0.00000826  | -0.000002314 |
| 7  | 0.00000788   | -0.00000307  | 0.000000292  |
| 7  | -0.00000765  | 0.00000523   | 0.000001753  |
| 16 | 0.0000069    | 0.00000686   | 0.000000597  |
| 8  | 0.00000414   | 0.00000036   | -0.000000328 |
| 8  | -0.00000263  | 0.0000004    | 0.000000219  |
| 6  | 0.00000091   | -0.00000012  | -0.000000837 |
| 6  | 0.00000445   | 0.00000015   | -0.00000086  |
| 6  | 0.000001242  | 0.000000382  | -0.000003547 |
| 6  | -0.00000826  | -0.00000934  | 0.000001781  |
| 6  | -0.00000145  | -0.000001433 | 0.000000173  |
| 6  | 0.00000387   | 0.00000053   | -0.000001945 |
| 1  | 0.00000224   | -0.00000105  | -0.000000604 |
| 1  | 0.00000912   | -0.00000554  | -0.000000172 |
| 1  | 0.00000056   | -0.00000813  | -0.000000156 |
| 1  | -0.00000155  | -0.00000489  | -0.000000308 |
| 6  | 0.00000577   | -0.00000504  | -0.000000207 |
| 1  | 0.00000824   | 0.000000412  | -0.000003176 |
| 1  | 0.000001979  | -0.000002314 | -0.00000274  |
| 1  | -0.00000207  | 0.000000127  | -0.000001134 |
| 6  | -0.000001055 | -0.00000523  | -0.000000563 |
| 1  | -0.00000046  | -0.00000572  | -0.000000305 |
| 1  | -0.00000367  | -0.00000061  | -0.000000216 |
| 16 | -0.00000052  | -0.000000126 | 0.000000415  |
| 8  | -0.00000802  | 0.000001042  | 0.000000239  |
| 8  | -0.00000862  | 0.00000172   | 0.000001117  |
| 6  | -0.00000881  | 0.00000188   | 0.000001509  |
| 6  | -0.00000565  | 0.000000496  | 0.000000714  |
| 6  | -0.00000594  | 0.000000414  | 0.000001753  |
| 6  | -0.000001197 | 0.00000112   | 0.000002106  |
| 1  | -0.0000002   | 0.000000221  | 0.000000818  |
| 6  | -0.000000112 | 0.000000372  | 0.000000796  |
| 1  | -0.000000812 | 0.000000635  | 0.000001363  |
| 6  | -0.000001511 | -0.000001225 | 0.000001799  |
| 1  | -0.000000395 | 0.000000596  | 0.000001139  |
| 1  | -0.000000732 | 0.000000852  | 0.000001749  |
| 6  | -0.000000115 | 0.000002232  | 0.000000771  |

|    |              |              |              |
|----|--------------|--------------|--------------|
| 1  | -0.000001265 | 0.000001621  | 0.000000666  |
| 1  | 0.000000616  | 0.000001502  | 0.000003106  |
| 1  | -0.000001045 | 0.000000328  | 0.000002267  |
| 6  | 0.000000165  | 0.000000399  | 0.000001155  |
| 1  | 0.000000183  | 0.000000596  | 0.000000543  |
| 6  | -0.000000842 | -0.000000503 | -0.000000038 |
| 6  | -0.000000925 | -0.000000252 | 0.000000133  |
| 6  | -0.000000864 | -0.00000033  | -0.000000521 |
| 6  | -0.000000964 | -0.000000111 | -0.000000058 |
| 1  | -0.000000746 | -0.000000967 | 0.000000754  |
| 6  | -0.000000742 | -0.000000759 | -0.000000728 |
| 1  | -0.000000394 | -0.000000301 | -0.000001037 |
| 6  | -0.000001559 | -0.000000606 | -0.000000329 |
| 1  | -0.000001272 | -0.000000222 | 0.00000013   |
| 1  | -0.000000941 | -0.000000762 | -0.000000743 |
| 1  | -0.000001392 | -0.000000604 | -0.0000003   |
| 6  | -0.00000027  | 0.000000813  | 0.000001128  |
| 1  | -0.00000014  | 0.000000951  | 0.0000011    |
| 1  | 0.000000182  | 0.000000667  | 0.000001281  |
| 1  | 0.000000321  | 0.0000006    | 0.000001185  |
| 6  | -0.000000086 | 0.000000444  | 0.000000827  |
| 1  | -0.00000024  | 0.00000052   | 0.000000484  |
| 1  | -0.000000483 | 0.000000561  | 0.000000886  |
| 1  | 0.000000016  | 0.000000448  | 0.000000826  |
| 79 | -0.000001519 | 0.000000658  | -0.000000276 |
| 6  | 0.000000088  | -0.000000173 | -0.00000039  |
| 6  | 0.000000268  | -0.00000037  | -0.000000258 |
| 6  | 0.000000266  | -0.000000068 | -0.000000718 |
| 1  | 0.000000359  | -0.000000259 | -0.000000417 |
| 1  | -0.000000356 | -0.000000565 | -0.000000094 |
| 7  | -0.000000744 | -0.00000071  | -0.000000849 |
| 7  | -0.000000105 | 0.000000982  | -0.000001133 |
| 6  | 0.000000616  | -0.000000277 | -0.000000559 |
| 6  | -0.000000844 | -0.000000235 | -0.000000512 |
| 6  | -0.000000736 | -0.00000088  | -0.000000276 |
| 6  | -0.000000996 | -0.000000106 | -0.000000535 |
| 6  | -0.000000671 | -0.000001484 | -0.000000366 |
| 6  | -0.000000763 | -0.000000841 | -0.0000002   |
| 1  | -0.000001045 | -0.000000709 | -0.000000265 |
| 1  | -0.000000399 | -0.000000918 | -0.000001135 |
| 1  | -0.000001069 | -0.000000849 | -0.000000882 |
| 6  | 0.000000621  | -0.000001602 | 0.000000148  |
| 6  | 0.000000866  | 0.000000269  | -0.000000318 |
| 6  | 0.000000913  | 0.000001373  | 0.000000091  |

|   |              |               |               |
|---|--------------|---------------|---------------|
| 6 | 0.000001136  | 0.000000199   | -0.000000063  |
| 6 | 0.000000738  | 0.000000418   | 0.000000332   |
| 6 | 0.000000094  | 0.000000315   | 0.000000418   |
| 1 | 0.000001272  | 0.000000556   | -0.000000023  |
| 1 | 0.000000763  | 0.000000814   | 0.000000651   |
| 1 | 0.000001299  | 0.000000766   | 0.000000306   |
| 6 | 0.000000018  | 0.000000092   | 0.000000391   |
| 6 | 0.000001529  | -0.000000792  | -0.000000159  |
| 6 | 0.000001248  | -0.000000245  | -0.000000622  |
| 1 | 0.000000936  | -0.000000484  | -0.000000748  |
| 1 | 0.000001348  | -0.000000058  | -0.000000837  |
| 1 | 0.000001125  | -0.000000355  | -0.000000868  |
| 1 | 0.000001779  | 0.000000073   | -0.000000551  |
| 1 | 0.000001464  | 0.000000191   | 0.000000511   |
| 1 | 0.000001509  | 0.000000045   | -0.000000069  |
| 1 | 0.000001172  | 0.000000087   | -0.000000631  |
| 6 | 0.000000004  | -0.000000024  | 0.000000639   |
| 6 | 0.000000064  | 0.000000189   | 0.000000606   |
| 6 | 0.000000402  | -0.000000184  | 0.000000418   |
| 1 | -0.000000267 | -0.000000315  | 0.000000149   |
| 1 | 0.000000417  | 0.000000266   | 0.000000498   |
| 1 | -0.000000022 | 0.000000534   | 0.000000667   |
| 1 | 0.000000267  | 0.000000397   | 0.000000613   |
| 1 | 0.000000368  | 0.000000298   | 0.000000007   |
| 1 | 0.000000296  | 0.000000468   | 0.000000023   |
| 1 | 0.000000019  | 0.000000031   | 0.000000032   |
| 6 | 0.000000634  | -0.000000663  | -0.0000001225 |
| 6 | -0.000000205 | -0.000000835  | -0.00000008   |
| 6 | -0.000000202 | -0.000001158  | -0.000001262  |
| 1 | -0.000000118 | -0.000000499  | -0.000001028  |
| 1 | 0.000000068  | -0.000000679  | -0.000001167  |
| 1 | 0.000000229  | -0.000000053  | -0.000000964  |
| 1 | 0.000000173  | -0.000000015  | -0.000001552  |
| 1 | -0.000000321 | -0.000000043  | -0.000000756  |
| 1 | -0.000000411 | -0.0000000518 | -0.000002443  |
| 1 | 0.000000493  | -0.000001152  | -0.000001412  |
| 6 | -0.000000078 | -0.000000317  | -0.000000151  |
| 6 | -0.000001013 | -0.000000841  | -0.000000466  |
| 6 | -0.000000733 | 0.000000071   | 0.000000589   |
| 1 | -0.000000357 | 0.000000354   | -0.000000082  |
| 1 | -0.000000705 | -0.000000696  | -0.000000373  |
| 1 | -0.000000923 | -0.000000204  | 0.000000175   |
| 1 | -0.000001467 | -0.000000456  | -0.000000311  |
| 1 | -0.000001129 | 0.000000072   | 0.000000168   |

|                                              |              |              |                             |
|----------------------------------------------|--------------|--------------|-----------------------------|
| 1                                            | -0.000001285 | -0.000000356 | -0.000000064                |
| 1                                            | -0.000000898 | -0.000000089 | 0.000000552                 |
| 6                                            | 0.000000818  | 0.000000854  | 0.000000224                 |
| 6                                            | 0.000000998  | 0.000000635  | 0.000000417                 |
| 6                                            | 0.000001097  | 0.000000586  | 0.000000672                 |
| 6                                            | 0.000001099  | 0.000000885  | 0.000000734                 |
| 6                                            | 0.000000638  | -0.000000048 | 0.000001084                 |
| 1                                            | 0.000001453  | 0.000000858  | 0.000000059                 |
| 1                                            | 0.000000303  | 0.000000193  | 0.000000368                 |
| 7                                            | 0.000000596  | 0.000000831  | -0.000000145                |
| 8                                            | 0.000000695  | 0.000001345  | 0.000001069                 |
| 1                                            | 0.000001099  | 0.000000977  | 0.000000918                 |
| 1                                            | 0.000001142  | 0.000000495  | 0.000000206                 |
| 17                                           | 0.000000417  | 0.000000623  | 0.000001122                 |
| Zero-point correction=                       |              |              | 1.152003 (Hartree/Particle) |
| Thermal correction to Energy=                |              |              | 1.227403                    |
| Thermal correction to Enthalpy=              |              |              | 1.228347                    |
| Thermal correction to Gibbs Free Energy=     |              |              | 1.027392                    |
| Sum of electronic and zero-point Energies=   |              |              | -4291.535062                |
| Sum of electronic and thermal Energies=      |              |              | -4291.459662                |
| Sum of electronic and thermal Enthalpies=    |              |              | -4291.458718                |
| Sum of electronic and thermal Free Energies= |              |              | -4291.659672                |

F-1b

|    |              |              |              |
|----|--------------|--------------|--------------|
| 6  | 0.000005983  | -0.000000032 | 0.000001586  |
| 6  | 0.000000246  | 0.000006373  | -0.000003246 |
| 7  | -0.000010905 | -0.000003624 | 0.000009106  |
| 7  | -0.000001794 | 0.000008885  | -0.000007793 |
| 16 | 0.000010953  | -0.000003778 | -0.00000915  |
| 8  | -0.000000935 | 0.000000112  | -0.000001951 |
| 8  | -0.000001426 | 0.000003981  | 0.000001049  |
| 6  | -0.000000899 | -0.000000579 | -0.00000096  |
| 6  | 0.000001768  | 0.000001419  | 0.000000751  |
| 6  | 0.000000346  | 0.000000046  | 0.000000068  |
| 6  | 0.000000252  | 0.000000903  | 0.000000585  |
| 6  | 0.000000311  | 0.000000223  | 0.000000267  |
| 6  | -0.000000403 | 0.000000738  | -0.000000263 |
| 1  | 0.000000162  | 0.000000494  | 0.000000441  |
| 1  | 0.000000057  | 0.000000662  | 0.000001016  |
| 1  | 0.000000297  | 0.000000382  | 0.000000336  |
| 1  | 0.000000055  | 0.000000452  | 0.000000356  |
| 6  | 0.000000714  | 0.000000533  | 0.000001018  |
| 1  | 0.000000281  | 0.000000581  | 0.000000969  |
| 1  | 0.000000858  | 0.000000726  | 0.000000867  |

|    |              |              |              |
|----|--------------|--------------|--------------|
| 1  | 0.00000388   | 0.00000562   | 0.00000193   |
| 6  | 0.000002684  | 0.000001226  | 0.000000165  |
| 1  | -0.000000722 | 0.000000337  | -0.000000227 |
| 1  | -0.000000479 | 0.000000099  | 0.000000083  |
| 16 | -0.000000054 | -0.000005604 | 0.000008659  |
| 8  | -0.000001928 | 0.000000071  | -0.000001579 |
| 8  | -0.00000015  | -0.000000024 | -0.000001642 |
| 6  | 0.000000503  | -0.000000666 | -0.000003224 |
| 6  | -0.000001346 | -0.000000065 | -0.000000649 |
| 6  | -0.000000298 | -0.000000083 | -0.000000886 |
| 6  | 0.000001184  | 0.000000024  | -0.00000115  |
| 1  | -0.000000075 | -0.00000001  | -0.000000092 |
| 6  | -0.000000509 | 0.000000394  | -0.000002011 |
| 1  | -0.000000307 | -0.000000398 | -0.000002191 |
| 6  | -0.000001012 | -0.000000182 | -0.000001663 |
| 1  | -0.000000544 | -0.000000513 | -0.000001123 |
| 1  | -0.000000195 | -0.000000336 | -0.000002271 |
| 6  | -0.000000529 | -0.000000371 | -0.000001712 |
| 1  | -0.000000049 | -0.000000404 | -0.000001967 |
| 1  | -0.000000256 | -0.000000449 | -0.000001766 |
| 1  | -0.000000439 | -0.000000029 | -0.000001795 |
| 6  | -0.000001495 | -0.000000393 | -0.000000093 |
| 1  | 0.000000494  | 0.000001517  | -0.000001488 |
| 6  | -0.000000494 | -0.000000851 | -0.000001377 |
| 6  | -0.000000169 | -0.000000898 | -0.000000923 |
| 6  | -0.000000793 | 0.000000672  | -0.000000149 |
| 6  | 0.000000112  | 0.000000019  | -0.000001019 |
| 1  | -0.000000623 | -0.000000144 | -0.000001179 |
| 6  | -0.000000277 | 0.000000053  | -0.000000035 |
| 1  | 0.000000044  | -0.000000375 | 0.000000206  |
| 6  | -0.000001086 | -0.000000812 | -0.000000489 |
| 1  | -0.000000398 | -0.000000316 | -0.000001154 |
| 1  | -0.000000185 | -0.000000483 | -0.000000116 |
| 1  | -0.000000018 | -0.000000476 | -0.000000787 |
| 6  | 0.000004284  | -0.000000866 | -0.000000876 |
| 1  | 0.000000084  | 0.000000055  | -0.000001699 |
| 1  | -0.000000329 | 0.000000153  | -0.000001838 |
| 1  | -0.000000472 | 0.000000897  | -0.000001389 |
| 6  | 0.000001425  | -0.000000162 | -0.000001396 |
| 1  | -0.000000098 | 0.000000412  | -0.000001474 |
| 1  | -0.000000026 | 0.000000603  | -0.000001203 |
| 1  | 0.000000253  | 0.000000581  | -0.000001527 |
| 79 | -0.000001156 | 0.000000795  | 0.000000068  |
| 6  | -0.000000839 | 0.000002515  | -0.000003127 |

|   |              |              |              |
|---|--------------|--------------|--------------|
| 6 | 0.000001111  | -0.000000442 | -0.000000246 |
| 6 | 0.000000548  | 0.000000838  | 0.000001877  |
| 1 | -0.000001304 | -0.000000609 | 0.000001989  |
| 1 | -0.000000307 | -0.000000323 | 0.000001217  |
| 7 | 0.000001358  | -0.00000212  | 0.000003336  |
| 7 | 0.000004055  | -0.000001554 | 0.000000615  |
| 6 | -0.000001394 | 0.000000763  | 0.000001738  |
| 6 | -0.000000328 | 0.000000062  | -0.000000992 |
| 6 | 0.000001608  | -0.00000078  | 0.000001332  |
| 6 | 0.000000818  | -0.000001784 | 0.000000407  |
| 6 | -0.000000735 | -0.000001276 | 0.000000624  |
| 6 | -0.00000098  | -0.00000073  | 0.000000692  |
| 1 | -0.000000726 | -0.000000737 | 0.000000398  |
| 1 | -0.000001066 | -0.00000072  | 0.000000596  |
| 1 | -0.000000928 | -0.000001027 | 0.000000485  |
| 6 | -0.000001591 | -0.000000934 | 0.000000433  |
| 6 | 0.000000263  | 0.000001595  | 0.00000141   |
| 6 | 0.000001554  | 0.000000154  | 0.000000822  |
| 6 | 0.000000871  | 0.000000789  | 0.000000928  |
| 6 | -0.000000018 | -0.000000166 | -0.000000381 |
| 6 | 0.000000587  | 0.000000677  | 0.000000783  |
| 1 | 0.000000613  | 0.000000745  | 0.000000891  |
| 1 | 0.000000141  | 0.000000081  | 0.000000323  |
| 1 | 0.000000577  | 0.000000676  | 0.000000398  |
| 6 | -0.000000085 | 0.000001967  | 0.00000101   |
| 6 | 0.00000014   | -0.000000192 | 0.000002046  |
| 6 | 0.000000325  | -0.000000419 | -0.000000322 |
| 1 | 0.000000654  | 0.000000111  | 0.000001261  |
| 1 | 0.000000574  | 0.000000778  | 0.000001312  |
| 1 | 0.000000729  | 0.000000911  | 0.00000146   |
| 1 | 0.000000656  | 0.000000509  | 0.000001626  |
| 1 | 0.000000339  | 0.00000045   | 0.000000482  |
| 1 | 0.000001266  | 0.000000742  | 0.00000156   |
| 1 | 0.000000969  | 0.000000819  | 0.000000805  |
| 6 | -0.000000198 | -0.000001592 | -0.000000049 |
| 6 | 0.00000065   | 0.000000595  | 0.000000055  |
| 6 | -0.000000181 | 0.00000008   | 0.000000793  |
| 1 | -0.000000142 | -0.000000418 | 0.000000562  |
| 1 | -0.000000364 | -0.000000373 | 0.000000607  |
| 1 | -0.000000481 | -0.000000573 | -0.000000087 |
| 1 | -0.000000488 | -0.000000008 | 0.000000048  |
| 1 | -0.000000159 | -0.000000398 | 0.000000904  |
| 1 | -0.00000007  | -0.000000304 | 0.000000455  |
| 1 | -0.000000348 | -0.000000481 | 0.000000561  |

|    |              |              |              |
|----|--------------|--------------|--------------|
| 6  | -0.000002266 | -0.000003325 | 0.000000628  |
| 6  | 0.000000224  | 0.000000059  | 0.000002257  |
| 6  | 0.000000482  | 0.000001092  | 0.000000169  |
| 1  | -0.000000957 | -0.000000603 | 0.000000538  |
| 1  | 0.000000038  | 0.000000273  | 0.000000892  |
| 1  | 0.000000365  | 0.000000474  | 0.000001268  |
| 1  | 0.000000273  | 0.000000601  | 0.000000586  |
| 1  | 0.000000558  | -0.000000445 | 0.000001483  |
| 1  | -0.000000839 | -0.000001535 | 0.000001514  |
| 1  | -0.00000015  | -0.00000005  | 0.000001785  |
| 6  | -0.000000873 | -0.000000946 | 0.000001051  |
| 6  | -0.000000807 | -0.00000008  | 0.000000765  |
| 6  | -0.000001237 | -0.000000894 | -0.000000053 |
| 1  | -0.000000221 | -0.000000047 | 0.000000236  |
| 1  | -0.00000006  | -0.000001163 | 0.000000343  |
| 1  | -0.000000978 | -0.000001277 | 0.000000253  |
| 1  | -0.000001264 | -0.000001048 | 0.000000616  |
| 1  | -0.000000033 | -0.000001056 | -0.000000401 |
| 1  | -0.000000058 | -0.000000763 | -0.000000525 |
| 1  | -0.000000696 | -0.000001023 | -0.000000402 |
| 6  | 0.000000291  | -0.000001044 | -0.000000044 |
| 6  | 0.000000984  | 0.000001791  | -0.000000535 |
| 6  | 0.000000212  | 0.000000515  | 0.000000116  |
| 6  | -0.000000041 | 0.000001958  | -0.000002048 |
| 6  | 0.000002577  | -0.000000831 | -0.00000101  |
| 1  | 0.000000989  | 0.000001205  | -0.000000037 |
| 1  | 0.000001233  | 0.000001315  | -0.000000157 |
| 7  | 0.000000255  | 0.000001688  | 0.000000063  |
| 8  | 0.000003477  | -0.000007017 | 0.000000461  |
| 1  | 0.000000612  | 0.000001155  | -0.000000344 |
| 1  | 0.000000633  | 0.000000755  | -0.000000123 |
| 17 | -0.000002005 | 0.000000292  | -0.000000295 |

|                                              |                             |
|----------------------------------------------|-----------------------------|
| Zero-point correction=                       | 1.154281 (Hartree/Particle) |
| Thermal correction to Energy=                | 1.229160                    |
| Thermal correction to Enthalpy=              | 1.230104                    |
| Thermal correction to Gibbs Free Energy=     | 1.032819                    |
| Sum of electronic and zero-point Energies=   | -4291.545092                |
| Sum of electronic and thermal Energies=      | -4291.470213                |
| Sum of electronic and thermal Enthalpies=    | -4291.469269                |
| Sum of electronic and thermal Free Energies= | -4291.666554                |

#### F-TS1a

|   |              |             |              |
|---|--------------|-------------|--------------|
| 6 | -0.000000018 | 0.000000052 | -0.000000896 |
| 6 | -0.000001076 | 0.000000563 | -0.00000017  |

|    |             |             |             |
|----|-------------|-------------|-------------|
| 7  | 0.00000706  | 0.00000339  | -0.00000636 |
| 7  | -0.00000515 | -0.00001144 | -0.00000394 |
| 16 | -0.00001032 | 0.00000188  | -0.00002388 |
| 8  | -0.00001417 | 0.00000206  | -0.00001946 |
| 8  | -0.00000826 | -0.00000016 | -0.00000312 |
| 6  | -0.00000973 | -0.00000102 | -0.00001897 |
| 6  | -0.00001406 | 0.00000096  | -0.00001254 |
| 6  | -0.00001835 | -0.00000855 | -0.00001654 |
| 6  | -0.00000657 | -0.00001227 | 0.00000072  |
| 6  | -0.00000555 | 0.00002148  | -0.00002268 |
| 6  | -0.00000762 | 0.00000083  | -0.00002089 |
| 1  | -0.00001926 | 0.00000013  | -0.00000976 |
| 1  | -0.00002876 | -0.00000054 | -0.00000006 |
| 1  | -0.00001593 | -0.00000032 | -0.00002445 |
| 1  | -0.00000906 | 0.00000135  | -0.00003015 |
| 6  | -0.00004506 | 0.00000055  | -0.00003077 |
| 1  | -0.00002342 | -0.00000429 | -0.00001446 |
| 1  | -0.00001671 | 0.00001243  | -0.00001289 |
| 1  | -0.00002925 | -0.00000695 | -0.00002027 |
| 6  | 0.00000717  | 0.00000019  | -0.00001662 |
| 1  | 0.00000387  | 0.00000332  | -0.000001   |
| 1  | 0.00000028  | -0.00000193 | -0.00000146 |
| 16 | -0.00001461 | 0.00000282  | -0.00000083 |
| 8  | -0.00001907 | 0.00000079  | 0.00000243  |
| 8  | -0.00001188 | -0.00000138 | 0.00000584  |
| 6  | -0.00001929 | -0.00000275 | -0.00000812 |
| 6  | -0.00002982 | 0.00000255  | -0.00001119 |
| 6  | -0.00002796 | 0.00000025  | -0.00000442 |
| 6  | -0.00003169 | 0.00000219  | -0.00002356 |
| 1  | -0.00002317 | 0.00000191  | -0.00001743 |
| 6  | -0.0000041  | -0.00000125 | -0.00000421 |
| 1  | -0.00002573 | -0.00000005 | 0.00000057  |
| 6  | -0.00003862 | 0.00000485  | -0.00001474 |
| 1  | -0.00003432 | 0.00000189  | -0.00002561 |
| 1  | -0.00003689 | 0.00000084  | -0.00000086 |
| 6  | -0.00003887 | -0.00000772 | -0.00002786 |
| 1  | -0.00004144 | 0.00000283  | -0.00003029 |
| 1  | -0.0000482  | -0.00000077 | -0.00001843 |
| 1  | -0.00004677 | 0.00000277  | -0.00002296 |
| 6  | 0.00000182  | -0.00000009 | -0.00000695 |
| 1  | 0.00000038  | -0.00000008 | -0.00001426 |
| 6  | 0.00001497  | -0.00000155 | -0.00002006 |
| 6  | 0.00001933  | -0.00000251 | -0.00001267 |
| 6  | 0.00001764  | 0.00000245  | -0.00002592 |



|    |              |              |              |
|----|--------------|--------------|--------------|
| 6  | 0.000002847  | -0.000000036 | -0.000001795 |
| 1  | 0.000002101  | 0.000000048  | -0.000000739 |
| 6  | 0.000002132  | 0.000000155  | -0.000003008 |
| 1  | 0.000000944  | 0.00000011   | -0.000003006 |
| 6  | 0.000002866  | 0.00000011   | -0.000002665 |
| 1  | 0.000003355  | 0.000000023  | -0.000001469 |
| 1  | 0.000002293  | 0.000000117  | -0.000003754 |
| 1  | 0.000003524  | 0.000000071  | -0.000002967 |
| 6  | -0.000000426 | 0.000000073  | -0.000000977 |
| 1  | -0.000000923 | 0.000000022  | -0.000000387 |
| 1  | -0.000001134 | 0.000000168  | -0.000001424 |
| 1  | -0.000000191 | 0.000000012  | -0.000001127 |
| 6  | 0.000000469  | -0.000000022 | 0.000000001  |
| 1  | 0.000000936  | 0.000000014  | 0.000000244  |
| 1  | 0.000000204  | 0.000000005  | 0.000000538  |
| 1  | 0.000000926  | 0.000000072  | -0.000000252 |
| 79 | 0.000000306  | -0.000000215 | 0.000000324  |
| 6  | 0.000000144  | -0.000000238 | 0.000000464  |
| 6  | 0.000000955  | -0.000000481 | 0.000002735  |
| 6  | 0.000000907  | 0.00000012   | 0.000002651  |
| 1  | 0.000000501  | -0.000000209 | 0.000003827  |
| 1  | 0.000001958  | -0.00000037  | 0.00000337   |
| 7  | 0.000002063  | 0.000000588  | 0.000002126  |
| 7  | 0.000000271  | 0.000000425  | 0.000002639  |
| 6  | 0.00000227   | 0.000000334  | 0.000001593  |
| 6  | 0.000003033  | -0.000000126 | 0.000001878  |
| 6  | 0.000002692  | -0.00000067  | 0.000000535  |
| 6  | 0.000003092  | -0.000000088 | 0.000000453  |
| 6  | 0.000002933  | -0.000000253 | 0.000001657  |
| 6  | 0.000003382  | 0.000000447  | 0.000000758  |
| 1  | 0.0000038    | -0.000000282 | 0.00000035   |
| 1  | 0.000003018  | -0.000000353 | 0.000000389  |
| 1  | 0.000004079  | -0.000000069 | -0.000000027 |
| 6  | -0.00000081  | -0.000000322 | 0.000002354  |
| 6  | -0.000001258 | 0.000000366  | 0.000002473  |
| 6  | -0.000000712 | -0.000000496 | 0.000003012  |
| 6  | -0.000002143 | -0.00000016  | 0.000002662  |
| 6  | -0.00000173  | 0.000000099  | 0.00000272   |
| 6  | -0.000002272 | -0.000000314 | 0.000002412  |
| 1  | -0.000002734 | -0.000000025 | 0.000002312  |
| 1  | -0.000001817 | 0.000000022  | 0.000002987  |
| 1  | -0.000002999 | -0.000000032 | 0.00000269   |
| 6  | -0.000001459 | 0.000000107  | 0.00000188   |
| 6  | -0.000001558 | -0.000000152 | 0.000002713  |

|   |              |              |              |
|---|--------------|--------------|--------------|
| 6 | -0.00000222  | 0.000000085  | 0.000001429  |
| 1 | -0.000000506 | -0.000000187 | 0.000001729  |
| 1 | -0.000001053 | -0.000000034 | 0.000003364  |
| 1 | -0.000001438 | -0.000000004 | 0.000002682  |
| 1 | -0.000002224 | -0.000000128 | 0.000002955  |
| 1 | -0.00000169  | -0.000000153 | 0.000000806  |
| 1 | -0.000002307 | 0.000000001  | 0.000001102  |
| 1 | -0.000001288 | 0.000000035  | 0.000001048  |
| 6 | -0.000000073 | -0.000000092 | 0.000002923  |
| 6 | -0.00000002  | 0.000000081  | 0.000002464  |
| 6 | 0.000000064  | -0.000000233 | 0.000003809  |
| 1 | 0.000000389  | -0.000000144 | 0.000002539  |
| 1 | -0.000000589 | -0.000000087 | 0.000001662  |
| 1 | 0.000000382  | -0.000000115 | 0.000002549  |
| 1 | -0.000000826 | -0.000000064 | 0.000002949  |
| 1 | 0.000000294  | -0.000000003 | 0.00000405   |
| 1 | -0.000000411 | -0.000000144 | 0.000004119  |
| 1 | 0.000000646  | -0.000000013 | 0.000003883  |
| 6 | 0.00000107   | -0.000000018 | 0.000000977  |
| 6 | 0.000001138  | -0.000000006 | 0.000000505  |
| 6 | 0.00000196   | -0.000000246 | 0.000001945  |
| 1 | 0.000000745  | -0.000000565 | 0.00000195   |
| 1 | 0.000001285  | 0.000000318  | 0.000000735  |
| 1 | 0.000000771  | -0.000000148 | 0.000000888  |
| 1 | 0.000001805  | 0.000000013  | 0.000000517  |
| 1 | 0.000001879  | 0.000000349  | 0.000002694  |
| 1 | 0.000002594  | -0.000000033 | 0.000002164  |
| 1 | 0.000001482  | -0.000000168 | 0.000002344  |
| 6 | 0.000002768  | -0.000000228 | 0.000001506  |
| 6 | 0.000003489  | -0.000000099 | 0.000002155  |
| 6 | 0.000002735  | -0.000000071 | 0.000000713  |
| 1 | 0.000002105  | 0.000000000  | 0.000001565  |
| 1 | 0.000003234  | -0.000000063 | 0.000002679  |
| 1 | 0.00000321   | -0.000000134 | 0.000002402  |
| 1 | 0.000003863  | -0.000000077 | 0.000001848  |
| 1 | 0.000002021  | 0.000000262  | 0.000000376  |
| 1 | 0.000003401  | -0.000000052 | 0.000000237  |
| 1 | 0.000002633  | -0.000000001 | 0.000000948  |
| 6 | 0.000000822  | 0.000000393  | -0.000003113 |
| 6 | 0.000001365  | -0.000000014 | -0.000003164 |
| 6 | 0.000001424  | 0.000000208  | -0.000003697 |
| 6 | 0.000000437  | 0.000000013  | -0.000004235 |
| 6 | -0.000000122 | -0.000000053 | -0.000003035 |
| 1 | 0.000001928  | 0.000000189  | -0.000004175 |

|                                              |              |              |                             |
|----------------------------------------------|--------------|--------------|-----------------------------|
| 1                                            | 0.000001245  | 0.000000205  | -0.000002186                |
| 7                                            | -0.000000265 | -0.000000216 | -0.000003466                |
| 8                                            | 0.000000263  | 0.000000203  | -0.000001664                |
| 1                                            | 0.000000422  | 0.000000181  | -0.000004313                |
| 1                                            | 0.000002155  | 0.000000065  | -0.000003147                |
| 17                                           | -0.000001149 | 0.000000003  | -0.000003258                |
| Zero-point correction=                       |              |              | 1.153119 (Hartree/Particle) |
| Thermal correction to Energy=                |              |              | 1.228001                    |
| Thermal correction to Enthalpy=              |              |              | 1.228945                    |
| Thermal correction to Gibbs Free Energy=     |              |              | 1.032284                    |
| Sum of electronic and zero-point Energies=   |              |              | -4291.548627                |
| Sum of electronic and thermal Energies=      |              |              | -4291.473745                |
| Sum of electronic and thermal Enthalpies=    |              |              | -4291.472801                |
| Sum of electronic and thermal Free Energies= |              |              | -4291.669462                |

F-1a

|    |              |              |              |
|----|--------------|--------------|--------------|
| 6  | -0.000003939 | -0.000000028 | 0.000000033  |
| 6  | 0.000008287  | 0.000002213  | -0.000001032 |
| 7  | 0.000001353  | -0.000000306 | -0.000003464 |
| 7  | -0.000002277 | -0.000001316 | -0.000004532 |
| 16 | -0.000001486 | 0.000001937  | 0.000001009  |
| 8  | -0.000002521 | -0.000000039 | -0.000001286 |
| 8  | 0.000001226  | -0.000000997 | -0.000000697 |
| 6  | 0.000002063  | -0.000000347 | 0.000000537  |
| 6  | -0.000002156 | 0.000000303  | 0.000000432  |
| 6  | -0.000002166 | -0.000000204 | 0.000000323  |
| 6  | -0.000002354 | 0.000000534  | 0.000000208  |
| 6  | 0.000000627  | -0.000001131 | 0.000001474  |
| 6  | -0.000002774 | -0.000001599 | -0.000000556 |
| 1  | -0.000000679 | -0.000000478 | 0.000000163  |
| 1  | -0.000001988 | -0.000001406 | 0.000000331  |
| 1  | -0.000000759 | -0.000000772 | 0.000000446  |
| 1  | 0.000000634  | 0.000000117  | -0.000000498 |
| 6  | -0.000001799 | -0.000001208 | 0.000000827  |
| 1  | -0.000001857 | -0.000001647 | 0.000001172  |
| 1  | -0.000002318 | -0.000001895 | 0.00000146   |
| 1  | -0.000002111 | -0.000002331 | 0.000000688  |
| 6  | 0.000000989  | 0.000002864  | 0.000001865  |
| 1  | 0.000000141  | -0.000000972 | 0.000000905  |
| 1  | 0.000000328  | -0.000000212 | 0.000000595  |
| 16 | 0.000001069  | 0.000000513  | -0.000005227 |
| 8  | -0.000000431 | -0.000000436 | 0.000000329  |
| 8  | -0.000000957 | 0.000002903  | 0.000000298  |
| 6  | -0.000000943 | 0.000000059  | -0.000000244 |

|    |              |              |              |
|----|--------------|--------------|--------------|
| 6  | -0.000001403 | 0.000000622  | -0.000001904 |
| 6  | -0.000000343 | 0.000001193  | -0.000002989 |
| 6  | -0.000000631 | 0.000000761  | -0.000001892 |
| 1  | -0.000000688 | 0.000000064  | -0.000001974 |
| 6  | -0.000002229 | 0.00000282   | -0.000003519 |
| 1  | -0.000000616 | 0.000001296  | -0.000003287 |
| 6  | -0.000001166 | -0.000000189 | -0.000005346 |
| 1  | -0.000001395 | 0.000000921  | -0.000002966 |
| 1  | -0.000000747 | 0.000001868  | -0.000004122 |
| 6  | -0.000001395 | 0.000001358  | -0.000004975 |
| 1  | -0.000001809 | 0.000001977  | -0.00000489  |
| 1  | -0.000000654 | 0.000001246  | -0.000004195 |
| 1  | -0.000001899 | 0.00000237   | -0.000003456 |
| 6  | 0.000004295  | 0.000003121  | 0.000004536  |
| 1  | 0.000001531  | 0.000001031  | -0.000001462 |
| 6  | 0.000001587  | -0.000000763 | 0.000001003  |
| 6  | 0.000000914  | 0.000000971  | 0.000000651  |
| 6  | 0.000001823  | -0.000000271 | 0.000000576  |
| 6  | 0.000002301  | -0.000000535 | 0.000001562  |
| 1  | 0.000001352  | 0.000000385  | 0.00000124   |
| 6  | 0.000001848  | 0.000001057  | 0.000000931  |
| 1  | 0.000001161  | 0.000000315  | 0.000000569  |
| 6  | 0.000002019  | 0.000001187  | 0.00000116   |
| 1  | 0.000002784  | 0.000000709  | 0.000001263  |
| 1  | 0.000002229  | 0.000000663  | 0.000001014  |
| 1  | 0.000003266  | 0.000000967  | 0.000001145  |
| 6  | -0.000001117 | 0.000000277  | -0.000003346 |
| 1  | 0.000001016  | 0.000001785  | -0.000002004 |
| 1  | 0.000000881  | 0.00000175   | -0.000002105 |
| 1  | 0.000001632  | 0.000001915  | -0.00000233  |
| 6  | 0.000001177  | 0.000000158  | -0.000001998 |
| 1  | 0.000001183  | 0.000000683  | -0.000000874 |
| 1  | 0.000000487  | 0.000001592  | -0.000001427 |
| 1  | 0.000001438  | 0.00000204   | -0.000001037 |
| 79 | -0.000002079 | -0.000000763 | 0.000000091  |
| 6  | -0.000000302 | -0.000002337 | 0.000000619  |
| 6  | -0.000001345 | 0.000001364  | 0.000000836  |
| 6  | -0.000001228 | -0.00000113  | 0.000002219  |
| 1  | -0.000001163 | -0.000001002 | 0.000001135  |
| 1  | 0.000000241  | -0.000002058 | 0.00000261   |
| 7  | 0.000000421  | 0.000000107  | 0.000001422  |
| 7  | 0.000001982  | -0.000000768 | 0.000002035  |
| 6  | 0.000001234  | -0.000001999 | 0.000000845  |
| 6  | 0.000000966  | -0.000001905 | 0.000003276  |

|   |             |             |             |
|---|-------------|-------------|-------------|
| 6 | 0.00000612  | 0.00000847  | 0.00002391  |
| 6 | 0.00002541  | 0.00000085  | 0.00002271  |
| 6 | 0.00001489  | -0.00001796 | 0.00003454  |
| 6 | 0.00001406  | -0.00000704 | 0.0000163   |
| 1 | 0.00002245  | -0.00000195 | 0.00001972  |
| 1 | 0.00000723  | -0.00001213 | 0.00003332  |
| 1 | 0.0000173   | -0.00000457 | 0.00003195  |
| 6 | -0.00001776 | -0.00001746 | -0.00001366 |
| 6 | -0.00001468 | -0.00000101 | -0.00001717 |
| 6 | -0.00001619 | -0.00000475 | 0.00000189  |
| 6 | -0.00002804 | -0.00001552 | 0.00000011  |
| 6 | -0.00001011 | 0.00000451  | -0.00001443 |
| 6 | -0.00001849 | -0.0000067  | -0.00000401 |
| 1 | -0.00002434 | -0.00001133 | -0.00000725 |
| 1 | -0.00001509 | -0.00000016 | -0.00001058 |
| 1 | -0.00002694 | -0.00000419 | -0.0000181  |
| 6 | -0.00002963 | -0.00000332 | 0.00000681  |
| 6 | -0.00002161 | -0.00002318 | 0.00001305  |
| 6 | -0.00001354 | -0.00001335 | -0.00000115 |
| 1 | -0.00001736 | -0.00001159 | 0.00000449  |
| 1 | -0.00002521 | -0.00001739 | 0.00000708  |
| 1 | -0.00002608 | -0.00001897 | 0.00000951  |
| 1 | -0.00002762 | -0.00001717 | 0.00000329  |
| 1 | -0.0000144  | -0.0000096  | -0.00000118 |
| 1 | -0.00002343 | -0.00000907 | -0.00000615 |
| 1 | -0.00001852 | -0.00001434 | 0.00000316  |
| 6 | -0.00000324 | 0.00000165  | 0.00000637  |
| 6 | -0.0000019  | -0.00000273 | -0.00001108 |
| 6 | -0.0000064  | -0.00000434 | 0.000007    |
| 1 | -0.00000137 | -0.00000415 | 0.00000328  |
| 1 | -0.00000403 | 0.00000898  | -0.00001072 |
| 1 | 0.00000056  | 0.0000076   | -0.00000268 |
| 1 | -0.00000097 | 0.0000051   | -0.00000838 |
| 1 | -0.00000449 | -0.00001369 | 0.00000293  |
| 1 | -0.00000828 | -0.00000302 | -0.00000112 |
| 1 | -0.00000152 | -0.00000088 | 0.00000295  |
| 6 | -0.0000283  | -0.0000097  | 0.00002156  |
| 6 | 0.00000282  | -0.00002526 | 0.00001968  |
| 6 | 0.00000564  | -0.00001653 | 0.00002895  |
| 1 | 0.00000038  | -0.00001471 | 0.00001944  |
| 1 | -0.00000506 | -0.00000588 | 0.00001804  |
| 1 | -0.00000844 | -0.00001703 | 0.00001959  |
| 1 | 0.0000015   | -0.00001294 | 0.00002111  |
| 1 | -0.00000236 | -0.0000165  | 0.00003288  |

|    |              |              |              |
|----|--------------|--------------|--------------|
| 1  | -0.00000101  | -0.000001833 | 0.000003261  |
| 1  | -0.000000892 | -0.000002247 | 0.000003088  |
| 6  | 0.000001459  | 0.000001146  | 0.000001409  |
| 6  | 0.00000129   | 0.000000302  | 0.00000241   |
| 6  | 0.000002447  | 0.000000417  | 0.000002525  |
| 1  | 0.000001837  | -0.000000583 | 0.000001305  |
| 1  | 0.000001421  | -0.000000291 | 0.0000022    |
| 1  | 0.000001672  | 0.000000166  | 0.00000158   |
| 1  | 0.000002542  | -0.000000727 | 0.000001783  |
| 1  | 0.000001886  | 0.000000002  | 0.000000684  |
| 1  | 0.000002575  | 0.000001284  | 0.000001307  |
| 1  | 0.000001731  | 0.000000503  | 0.000000656  |
| 6  | 0.000001394  | -0.000000961 | 0.000000004  |
| 6  | 0.000002479  | 0.000002366  | -0.000000648 |
| 6  | 0.000002313  | 0.000002124  | -0.000001841 |
| 6  | 0.000002634  | 0.000001525  | -0.000001083 |
| 6  | 0.000000905  | 0.000003207  | -0.000002886 |
| 1  | 0.000002692  | 0.000002208  | -0.000000897 |
| 1  | 0.000002253  | 0.000001003  | -0.000000059 |
| 7  | 0.000000339  | 0.000000663  | -0.000000097 |
| 8  | -0.000003731 | 0.000002715  | -0.000002025 |
| 1  | 0.000001819  | 0.00000201   | -0.000002347 |
| 1  | 0.000002516  | 0.00000138   | -0.000000324 |
| 17 | 0.000000524  | 0.000001206  | -0.000001932 |

|                                              |                             |
|----------------------------------------------|-----------------------------|
| Zero-point correction=                       | 1.154412 (Hartree/Particle) |
| Thermal correction to Energy=                | 1.229338                    |
| Thermal correction to Enthalpy=              | 1.230282                    |
| Thermal correction to Gibbs Free Energy=     | 1.032776                    |
| Sum of electronic and zero-point Energies=   | -4291.553518                |
| Sum of electronic and thermal Energies=      | -4291.478592                |
| Sum of electronic and thermal Enthalpies=    | -4291.477647                |
| Sum of electronic and thermal Free Energies= | -4291.675153                |

#### F-TS2a

|    |              |              |              |
|----|--------------|--------------|--------------|
| 6  | 0.000001673  | -0.000000518 | -0.000000581 |
| 6  | -0.000000724 | 0.000000756  | 0.000000404  |
| 7  | -0.000001138 | 0.000000707  | 0.000000033  |
| 7  | 0.000001288  | 0.000000573  | -0.000000575 |
| 16 | -0.000000085 | 0.000000233  | -0.000000064 |
| 8  | -0.000000002 | -0.000000237 | 0.000000636  |
| 8  | -0.000000197 | 0.000000888  | -0.000000385 |
| 6  | -0.000000176 | 0.000000417  | -0.000000625 |
| 6  | -0.000000721 | 0.00000066   | -0.000000132 |
| 6  | -0.000001274 | -0.000000251 | -0.000000585 |

|    |              |              |              |
|----|--------------|--------------|--------------|
| 6  | -0.00000828  | 0.00000709   | -0.00000479  |
| 6  | -0.00000081  | 0.00000431   | -0.000001075 |
| 6  | -0.00000293  | 0.00000806   | -0.000001293 |
| 1  | -0.00000393  | 0.00000032   | -0.00000235  |
| 1  | -0.00000779  | -0.00000574  | 0.00000003   |
| 1  | -0.000001189 | 0.00000837   | -0.000001109 |
| 1  | -0.00000476  | 0.00000934   | -0.000001083 |
| 6  | -0.000001627 | 0.00000555   | -0.00000821  |
| 1  | -0.000001345 | 0.00000053   | -0.00000128  |
| 1  | -0.000001518 | -0.00000085  | -0.000001293 |
| 1  | -0.000001485 | 0.000000175  | -0.000001442 |
| 6  | 0.00000028   | 0.000001247  | -0.000000611 |
| 1  | 0.00000374   | 0.00000998   | -0.00000053  |
| 1  | 0.00000248   | 0.000001199  | -0.00000478  |
| 16 | 0.000001586  | 0.00000708   | -0.000000107 |
| 8  | 0.00000775   | 0.000001042  | -0.00000246  |
| 8  | 0.000001359  | 0.00000532   | 0.000000717  |
| 6  | 0.00000116   | 0.00000694   | -0.000000166 |
| 6  | 0.00000515   | 0.00000465   | 0.00000332   |
| 6  | 0.00000644   | 0.00000345   | -0.0000001   |
| 6  | 0.000001604  | 0.00000479   | 0.000001011  |
| 1  | 0.000001572  | 0.00000734   | 0.00000058   |
| 6  | 0.00000492   | 0.00000262   | 0.00000428   |
| 1  | 0.00000688   | 0.00000678   | 0.000000178  |
| 6  | 0.000002359  | 0.000001238  | 0.00000167   |
| 1  | 0.000001968  | 0.00000724   | 0.000000881  |
| 1  | 0.00000947   | 0.00000037   | 0.000000634  |
| 6  | 0.00000141   | -0.000000197 | 0.000000392  |
| 1  | 0.000001361  | 0.00000298   | 0.000000774  |
| 1  | 0.000001836  | 0.00000315   | 0.000000337  |
| 1  | 0.000001333  | 0.000000114  | 0.000000723  |
| 6  | 0.00000028   | 0.00000402   | 0.000000929  |
| 1  | 0.00000773   | -0.00000238  | 0.000000284  |
| 6  | 0.00000151   | 0.000001554  | -0.000000663 |
| 6  | 0.00000133   | 0.000001358  | -0.000000961 |
| 6  | -0.00000097  | 0.000001247  | -0.000000908 |
| 6  | -0.00000056  | 0.000001666  | -0.00000118  |
| 1  | 0.00000227   | 0.000001428  | -0.000000728 |
| 6  | -0.00000504  | 0.000001442  | -0.000001074 |
| 1  | 0.00000148   | 0.000001117  | -0.000000726 |
| 6  | -0.00000493  | 0.000001784  | -0.000001275 |
| 1  | -0.00000029  | 0.000001755  | -0.00000122  |
| 1  | -0.00000589  | 0.000001401  | -0.000001455 |
| 1  | -0.00000474  | 0.000001795  | -0.000001542 |

|    |              |              |              |
|----|--------------|--------------|--------------|
| 6  | 0.00000788   | -0.00000224  | 0.00000292   |
| 1  | 0.00001184   | -0.00000006  | 0.000000447  |
| 1  | 0.00000309   | -0.00000378  | 0.000000551  |
| 1  | 0.00001069   | -0.00000202  | 0.00000076   |
| 6  | 0.00000071   | 0.00000182   | 0.000000412  |
| 1  | 0.00001192   | 0.00000075   | 0.000000096  |
| 1  | 0.00000102   | 0.000000896  | 0.000000305  |
| 1  | 0.00001058   | 0.000000277  | 0.000000392  |
| 79 | -0.00000213  | -0.000000574 | 0.000000933  |
| 6  | 0.000000545  | -0.000000375 | -0.000000363 |
| 6  | -0.00000058  | -0.00000107  | 0.000000313  |
| 6  | -0.000000146 | -0.000000896 | 0.000000459  |
| 1  | -0.000000101 | -0.000001296 | 0.000000763  |
| 1  | -0.000000578 | -0.000001127 | 0.000000036  |
| 7  | -0.000000425 | -0.000000546 | 0.000000524  |
| 7  | -0.000000303 | -0.000000747 | 0.000000734  |
| 6  | -0.000000775 | -0.000000341 | -0.000000471 |
| 6  | -0.00000002  | -0.000000665 | 0.000000179  |
| 6  | -0.000000794 | -0.000000272 | -0.000000254 |
| 6  | -0.000000303 | -0.000000128 | -0.000000017 |
| 6  | -0.000000973 | -0.000000389 | -0.000000476 |
| 6  | -0.000000839 | -0.000000147 | -0.000000604 |
| 1  | -0.000000545 | -0.000000057 | -0.000000227 |
| 1  | -0.000001236 | -0.000000309 | -0.000000488 |
| 1  | -0.000001089 | -0.000000013 | -0.000000676 |
| 6  | 0.000000041  | -0.000000643 | 0.000000014  |
| 6  | 0.000000403  | -0.000001508 | 0.000001155  |
| 6  | 0.000000351  | -0.000000739 | 0.000000916  |
| 6  | 0.000000494  | -0.000000777 | 0.000000128  |
| 6  | 0.000001096  | -0.000001384 | 0.000001199  |
| 6  | 0.000000927  | -0.000000758 | 0.000000072  |
| 1  | 0.000000378  | -0.000000912 | 0.000001047  |
| 1  | 0.000000859  | -0.000001071 | 0.000001378  |
| 1  | 0.000000902  | -0.000000094 | 0.000001317  |
| 6  | -0.000000096 | -0.000001024 | 0.000000624  |
| 6  | -0.000000399 | -0.000001377 | 0.000000655  |
| 6  | -0.000000312 | -0.000000806 | 0.000000211  |
| 1  | -0.000000152 | -0.000000973 | 0.000000034  |
| 1  | -0.00000003  | -0.000001474 | 0.000000744  |
| 1  | -0.000000514 | -0.000001347 | 0.000000055  |
| 1  | -0.000000115 | -0.000001326 | 0.000000905  |
| 1  | 0.000000207  | -0.000000364 | 0.000000699  |
| 1  | -0.000000068 | -0.000000768 | 0.000000467  |
| 1  | -0.000000298 | -0.000000697 | 0.000000371  |



|    |              |              |              |
|----|--------------|--------------|--------------|
| 6  | 0.000000835  | -0.000001166 | 0.000001112  |
| 6  | 0.000000974  | -0.000000454 | 0.000000684  |
| 6  | 0.000000533  | -0.000001001 | 0.000001309  |
| 1  | 0.000000716  | -0.000000793 | 0.000000684  |
| 1  | 0.000001406  | 0.000000364  | 0.000000385  |
| 1  | 0.000000092  | -0.000000336 | 0.000001104  |
| 1  | 0.000000884  | -0.000000404 | 0.000001423  |
| 1  | 0.000000409  | -0.000001379 | 0.000001286  |
| 1  | 0.00000007   | -0.00000111  | 0.000001373  |
| 1  | 0.000000733  | -0.000001198 | 0.00000117   |
| 6  | -0.000000797 | -0.00000061  | -0.000000123 |
| 6  | -0.000000977 | -0.000000413 | -0.000000281 |
| 6  | -0.000001186 | -0.000001016 | -0.000000088 |
| 1  | -0.000000744 | -0.000000892 | 0.000000117  |
| 1  | -0.000000675 | -0.000000365 | -0.000000028 |
| 1  | -0.000001025 | -0.000000593 | -0.000000345 |
| 1  | -0.000001174 | -0.000000322 | -0.000000584 |
| 1  | -0.000001225 | -0.000001099 | -0.000000084 |
| 1  | -0.000001435 | -0.000000888 | -0.000000363 |
| 1  | -0.000001375 | -0.000001062 | -0.000000188 |
| 6  | -0.000000114 | -0.000000198 | 0.000000263  |
| 6  | -0.000000282 | -0.000000544 | 0.000000017  |
| 6  | -0.000000007 | -0.000000108 | 0.000000248  |
| 1  | -0.000000064 | -0.000000565 | 0.000000212  |
| 1  | -0.000000529 | -0.000000862 | 0.000000269  |
| 1  | 0.000000001  | -0.000000561 | 0.000000438  |
| 1  | -0.000000323 | -0.000000375 | 0.000000059  |
| 1  | 0.000000366  | 0.000000023  | -0.000000357 |
| 1  | 0.00000002   | 0.00000015   | -0.00000007  |
| 1  | 0.000000381  | -0.000000005 | 0.000000301  |
| 6  | 0.000000055  | 0.000000278  | -0.000000376 |
| 6  | -0.000001044 | 0.000000741  | -0.000000923 |
| 6  | -0.000000971 | 0.000000649  | -0.000001118 |
| 6  | -0.000000443 | 0.000001023  | -0.000001116 |
| 6  | -0.000000655 | 0.000000714  | -0.000000864 |
| 1  | -0.000001053 | 0.000000086  | -0.000001307 |
| 1  | -0.000001823 | 0.000000748  | -0.000001403 |
| 7  | -0.000001024 | 0.000000231  | -0.000000408 |
| 8  | 0.000000636  | 0.000001186  | -0.000000845 |
| 1  | -0.000000508 | 0.000000917  | -0.000000967 |
| 1  | -0.00000118  | 0.000000561  | -0.000001122 |
| 17 | 0.000000022  | 0.000000416  | -0.000000357 |

Zero-point correction=

1.152226 (Hartree/Particle)

Thermal correction to Energy=

1.227338

|                                              |              |
|----------------------------------------------|--------------|
| Thermal correction to Enthalpy=              | 1.228283     |
| Thermal correction to Gibbs Free Energy=     | 1.030734     |
| Sum of electronic and zero-point Energies=   | -4291.525011 |
| Sum of electronic and thermal Energies=      | -4291.449898 |
| Sum of electronic and thermal Enthalpies=    | -4291.448954 |
| Sum of electronic and thermal Free Energies= | -4291.646503 |

F-2a

|    |              |              |              |
|----|--------------|--------------|--------------|
| 6  | -0.000015794 | 0.000000147  | 0.000000846  |
| 6  | 0.000002509  | 0.000003671  | 0.000000161  |
| 7  | 0.000008429  | 0.000007624  | 0.000022979  |
| 7  | 0.000000535  | -0.000004835 | -0.000000961 |
| 16 | 0.000001103  | -0.000004978 | -0.000010807 |
| 8  | -0.000001565 | -0.000004846 | -0.000001695 |
| 8  | -0.000000068 | 0.000002382  | -0.000001239 |
| 6  | -0.000004317 | -0.000006387 | 0.000003829  |
| 6  | 0.000001129  | -0.000000033 | -0.000001322 |
| 6  | -0.000002453 | -0.000002318 | -0.000001835 |
| 6  | -0.000001001 | 0.000000328  | -0.000001063 |
| 6  | 0.000001295  | -0.000001599 | 0.000004517  |
| 6  | 0.000000304  | 0.000001448  | -0.000000989 |
| 1  | -0.000001123 | -0.000001294 | -0.000000187 |
| 1  | 0.000000345  | -0.000001672 | -0.000000149 |
| 1  | -0.000000002 | -0.000001778 | 0.000000147  |
| 1  | -0.000001322 | -0.000001872 | 0.000001054  |
| 6  | -0.000001666 | -0.00000252  | 0.000001205  |
| 1  | 0.000001423  | -0.000000222 | -0.000001453 |
| 1  | -0.000000788 | -0.000001137 | 0.00000013   |
| 1  | -0.000000045 | -0.000002762 | -0.000001492 |
| 6  | -0.000000595 | 0.000006945  | -0.000011483 |
| 1  | 0.000001288  | -0.000002866 | 0.000002404  |
| 1  | 0.000000878  | -0.000003758 | 0.000005454  |
| 16 | 0.000005812  | 0.000004751  | -0.000001391 |
| 8  | -0.00000226  | 0.000000705  | 0.000004991  |
| 8  | -0.000003488 | -0.000006598 | 0.000002357  |
| 6  | 0.000003895  | -0.000000658 | -0.000000981 |
| 6  | -0.000000205 | 0.000000087  | 0.000006233  |
| 6  | 0.000000042  | 0.000000766  | 0.000002435  |
| 6  | -0.000001519 | -0.000001133 | 0.000000803  |
| 1  | 0.000000747  | -0.000000427 | -0.000000744 |
| 6  | 0.000000457  | -0.00000001  | -0.000001563 |
| 1  | -0.000000296 | 0.000000518  | 0.000001235  |
| 6  | 0.000001413  | 0.000002569  | 0.000002907  |
| 1  | 0.00000157   | 0.000001124  | 0.000001411  |

|    |              |              |              |
|----|--------------|--------------|--------------|
| 1  | 0.000000747  | 0.00000147   | -0.000000522 |
| 6  | -0.000000508 | 0.000000208  | 0.000000037  |
| 1  | 0.000000758  | 0.000001371  | 0.0000000374 |
| 1  | 0.000000483  | 0.000001089  | 0.000001446  |
| 1  | 0.000001588  | 0.000002088  | 0.000001242  |
| 6  | 0.000002549  | 0.000000915  | 0.0000008593 |
| 1  | 0.000001325  | -0.000001675 | -0.000000389 |
| 6  | 0.000003387  | 0.000000307  | 0.0000003543 |
| 6  | 0.000003172  | 0.000001813  | 0.000002497  |
| 6  | -0.000001169 | 0.000001453  | 0.000000015  |
| 6  | -0.000001389 | -0.00000135  | 0.000001755  |
| 1  | 0.000000562  | -0.000001352 | 0.000000887  |
| 6  | 0.000003898  | 0.000000711  | 0.000001696  |
| 1  | -0.00000157  | -0.000002422 | 0.000000118  |
| 6  | -0.000000212 | -0.000002095 | 0.000000174  |
| 1  | 0.000000394  | -0.000000525 | 0.000001904  |
| 1  | 0.000000157  | -0.000000059 | 0.000000767  |
| 1  | 0.000000347  | -0.000000318 | 0.00000101   |
| 6  | 0.000000182  | -0.000000451 | -0.00000353  |
| 1  | 0.000001196  | -0.000000134 | 0.000000866  |
| 1  | -0.000000679 | 0.000000692  | -0.000000039 |
| 1  | -0.000000816 | 0.000000074  | 0.000001757  |
| 6  | 0.000001359  | 0.000001637  | -0.000005358 |
| 1  | 0.000001481  | -0.000001949 | 0.000002591  |
| 1  | -0.000000766 | -0.000001289 | 0.000001071  |
| 1  | -0.000000238 | -0.000002451 | 0.000000914  |
| 79 | -0.000000263 | -0.000006569 | -0.000001209 |
| 6  | 0.000007398  | -0.000000033 | 0.000000255  |
| 6  | 0.000000838  | -0.00000231  | 0.000003547  |
| 6  | -0.000004321 | 0.00000088   | -0.000004966 |
| 1  | -0.000001387 | 0.000000738  | -0.000001501 |
| 1  | -0.000000223 | 0.000000103  | -0.000001132 |
| 7  | -0.000001475 | 0.000006784  | -0.000002634 |
| 7  | 0.000001311  | 0.000000186  | 0.000000741  |
| 6  | -0.000001917 | -0.000002448 | -0.000000832 |
| 6  | 0.00000183   | 0.000003825  | -0.000000031 |
| 6  | 0.000005238  | 0.000002673  | -0.000001217 |
| 6  | -0.000000461 | 0.000000468  | -0.000002384 |
| 6  | -0.000001147 | 0.000000065  | -0.000001641 |
| 6  | -0.000001491 | 0.000000066  | -0.000000444 |
| 1  | -0.000000018 | 0.000000541  | -0.000000398 |
| 1  | -0.000000714 | 0.000000238  | -0.000000785 |
| 1  | 0.000000133  | 0.000001544  | -0.000001156 |
| 6  | -0.000005789 | -0.000000039 | 0.00000103   |

|   |              |              |              |
|---|--------------|--------------|--------------|
| 6 | -0.00000632  | 0.00000473   | -0.0000049   |
| 6 | 0.0000048    | -0.000003545 | -0.000002542 |
| 6 | 0.000001396  | -0.000002909 | -0.000001062 |
| 6 | -0.000000263 | -0.000001108 | 0.000001721  |
| 6 | -0.000000861 | 0.000001391  | -0.000001298 |
| 1 | -0.000001069 | -0.000000568 | -0.000000728 |
| 1 | -0.00000113  | -0.000000103 | 0.000001139  |
| 1 | -0.000000103 | -0.000001174 | 0.000000411  |
| 6 | 0.000001899  | 0.000002495  | -0.000000867 |
| 6 | -0.000001046 | -0.000002753 | 0.000000377  |
| 6 | -0.00000004  | -0.000004094 | -0.000002538 |
| 1 | 0.000000032  | -0.000001079 | 0.00000064   |
| 1 | -0.000000333 | -0.000001046 | -0.000001407 |
| 1 | -0.000000612 | -0.000001651 | -0.000001117 |
| 1 | -0.000001    | 0.000000001  | -0.000001262 |
| 1 | -0.000000084 | 0.000000983  | -0.000001158 |
| 1 | 0.000000025  | -0.000001387 | -0.000000133 |
| 1 | -0.000001597 | 0.000000286  | 0.000000087  |
| 6 | -0.000004038 | 0.000004882  | 0.000001385  |
| 6 | 0.000002388  | -0.000002173 | 0.000000666  |
| 6 | 0.000001474  | -0.000001095 | -0.000002684 |
| 1 | -0.000001519 | -0.00000077  | -0.000000884 |
| 1 | 0.000001737  | 0.000000475  | 0.000001218  |
| 1 | 0.000000208  | 0.000001353  | 0.000000079  |
| 1 | 0.00000019   | 0.000000597  | -0.000000462 |
| 1 | 0.000000787  | 0.000000098  | -0.000000566 |
| 1 | -0.000000801 | -0.000000231 | -0.000000427 |
| 1 | -0.000000485 | 0.000001354  | -0.000000034 |
| 6 | -0.000000373 | 0.000004231  | -0.000000784 |
| 6 | -0.000002687 | -0.000004215 | -0.000002381 |
| 6 | -0.000002843 | -0.000001672 | -0.000001427 |
| 1 | 0.000000171  | 0.000000349  | -0.000001631 |
| 1 | -0.000003217 | 0.000002358  | 0.000000972  |
| 1 | 0.000000019  | -0.000000387 | -0.000000701 |
| 1 | -0.00000008  | 0.000000702  | 0.000000011  |
| 1 | -0.000000155 | -0.000000144 | -0.000001205 |
| 1 | 0.000000256  | 0.000001931  | -0.000002893 |
| 1 | -0.000000925 | -0.000000391 | -0.000001664 |
| 6 | 0.000000813  | 0.000001062  | -0.000002806 |
| 6 | 0.000000703  | 0.000002743  | 0.000001054  |
| 6 | 0.000000104  | 0.000004177  | -0.000000655 |
| 1 | -0.000001294 | 0.000001142  | -0.000000746 |
| 1 | -0.000000302 | 0.000000398  | -0.00000154  |
| 1 | -0.000000114 | 0.000001766  | -0.000000971 |

|    |              |              |              |
|----|--------------|--------------|--------------|
| 1  | -0.00000638  | 0.000001292  | -0.000001365 |
| 1  | 0.000000159  | -0.000000499 | 0.000000033  |
| 1  | 0.000000407  | 0.000001644  | 0.000000395  |
| 1  | 0.00000048   | 0.000001449  | 0.000000272  |
| 6  | -0.000005324 | 0.000003678  | 0.000004088  |
| 6  | -0.000003051 | 0.000000492  | -0.000003626 |
| 6  | 0.000001079  | 0.000000036  | -0.000001952 |
| 6  | 0.000002188  | -0.000001694 | -0.000001799 |
| 6  | -0.000000148 | 0.000003868  | 0.000009066  |
| 1  | 0.000000304  | 0.000001083  | 0.000000806  |
| 1  | 0.000000794  | 0.000000568  | 0.000002301  |
| 7  | 0.000007889  | -0.00000748  | -0.000015785 |
| 8  | -0.000003833 | 0.000005352  | 0.000005836  |
| 1  | 0.000000331  | 0.0000006    | -0.000000472 |
| 1  | 0.000000644  | -0.000001193 | 0.000000181  |
| 17 | 0.00000092   | 0.000002703  | -0.000004588 |

Zero-point correction=

1.155044 (Hartree/Particle)

Thermal correction to Energy=

1.229557

Thermal correction to Enthalpy=

1.230501

Thermal correction to Gibbs Free Energy=

1.036544

Sum of electronic and zero-point Energies=

-4291.537545

Sum of electronic and thermal Energies=

-4291.463032

Sum of electronic and thermal Enthalpies=

-4291.462088

Sum of electronic and thermal Free Energies=

-4291.656045

F-TS2b

|    |              |              |              |
|----|--------------|--------------|--------------|
| 6  | -0.00000655  | 0.000000412  | -0.000000202 |
| 6  | 0.000000776  | 0.000000633  | 0.000000651  |
| 7  | 0.000000265  | -0.000000358 | 0.000000715  |
| 7  | 0.000000353  | -0.000000538 | -0.000000822 |
| 16 | -0.000000419 | 0.000000087  | 0.000001096  |
| 8  | -0.000000499 | 0.000000906  | -0.000000112 |
| 8  | -0.00000063  | 0.000001081  | 0.00000012   |
| 6  | -0.000000781 | 0.000000595  | 0.000000963  |
| 6  | -0.000000983 | 0.000000311  | 0.000000501  |
| 6  | -0.00000178  | -0.000000159 | 0.000000797  |
| 6  | -0.00000118  | 0.000000928  | 0.000000993  |
| 6  | -0.000001333 | 0.000000704  | 0.000001024  |
| 6  | -0.000001065 | 0.000000605  | 0.000001364  |
| 1  | -0.000001081 | 0.000000658  | 0.000000622  |
| 1  | -0.000001912 | 0.000000029  | 0.000000835  |
| 1  | -0.000001464 | 0.000000994  | 0.00000014   |
| 1  | -0.000000783 | 0.000001299  | 0.000001168  |
| 6  | -0.000002087 | 0.000000525  | 0.000001101  |

|    |              |              |              |
|----|--------------|--------------|--------------|
| 1  | -0.00000207  | 0.000000755  | 0.000001325  |
| 1  | -0.000002237 | 0.000000343  | 0.000001316  |
| 1  | -0.000002107 | 0.000000627  | 0.000001212  |
| 6  | -0.000000511 | 0.000000638  | 0.000000854  |
| 1  | -0.000000367 | 0.000000722  | 0.000000574  |
| 1  | -0.000000875 | 0.000001116  | 0.000000091  |
| 16 | 0.000000765  | 0.000001636  | -0.000000495 |
| 8  | 0.000001266  | -0.000000056 | 0.000000985  |
| 8  | 0.000000479  | 0.000000268  | 0.000000097  |
| 6  | 0.00000177   | 0.000000466  | 0.00000017   |
| 6  | 0.0000016    | 0.000000371  | -0.000000363 |
| 6  | 0.000000867  | 0.000000197  | -0.000000503 |
| 6  | 0.000003039  | 0.000000075  | -0.00000023  |
| 1  | 0.000001614  | 0.000000208  | -0.000000201 |
| 6  | 0.000000613  | 0.000000111  | 0.000001245  |
| 1  | 0.000000926  | 0.000000237  | -0.000000037 |
| 6  | 0.000001677  | -0.000000128 | -0.000000714 |
| 1  | 0.000002138  | 0.000000061  | -0.000000621 |
| 1  | 0.000001599  | -0.000000151 | -0.000000695 |
| 6  | 0.000002423  | -0.000000284 | -0.000000942 |
| 1  | 0.000001804  | -0.000000594 | 0.000000389  |
| 1  | 0.000003193  | -0.000000927 | -0.000001646 |
| 1  | 0.000001476  | 0.000000921  | -0.000001716 |
| 6  | 0.000000718  | -0.000000294 | -0.000000127 |
| 1  | 0.000000155  | -0.000000228 | -0.000000299 |
| 6  | -0.000000006 | 0.000000454  | 0.000000039  |
| 6  | 0.000000638  | 0.000001039  | 0.000000915  |
| 6  | -0.0000002   | 0.000001119  | 0.000001086  |
| 6  | 0.000000205  | 0.00000157   | 0.000001426  |
| 1  | 0.000000547  | 0.000001596  | 0.000000546  |
| 6  | 0.000000208  | 0.000001274  | 0.000001157  |
| 1  | -0.000000447 | 0.000001011  | 0.000001053  |
| 6  | 0.000000238  | 0.000001164  | 0.000001398  |
| 1  | 0.000000738  | 0.000001786  | 0.000001141  |
| 1  | -0.000000116 | 0.000001594  | 0.000001364  |
| 1  | 0.000000432  | 0.000001828  | 0.000001416  |
| 6  | 0.000000854  | -0.000000556 | -0.000000434 |
| 1  | 0.000000846  | -0.000000367 | -0.000000598 |
| 1  | 0.000000448  | 0.00000017   | -0.000000396 |
| 1  | 0.000000496  | -0.000000512 | -0.000000827 |
| 6  | 0.000000744  | 0.000000428  | -0.000000395 |
| 1  | 0.000001097  | 0.000000624  | 0.000000164  |
| 1  | 0.000000966  | 0.000000047  | -0.000000345 |
| 1  | 0.000000764  | -0.000000355 | -0.00000022  |

|    |              |              |              |
|----|--------------|--------------|--------------|
| 79 | 0.00000024   | -0.000000623 | 0.000000289  |
| 6  | 0.000000968  | -0.000000655 | -0.000000366 |
| 6  | -0.000000263 | -0.000000775 | -0.000000148 |
| 6  | -0.000000413 | -0.000000306 | -0.000000994 |
| 1  | -0.000000643 | -0.000001026 | -0.000000892 |
| 1  | -0.000000447 | -0.000001074 | -0.000000401 |
| 7  | -0.000000751 | -0.000000334 | -0.000000649 |
| 7  | -0.000000763 | -0.000001321 | -0.000000459 |
| 6  | -0.000001073 | 0.000000908  | -0.000000882 |
| 6  | 0.000000382  | -0.000000146 | -0.000000043 |
| 6  | -0.000000793 | -0.000000252 | -0.000000002 |
| 6  | 0.000000206  | -0.000000325 | 0.000000108  |
| 6  | -0.000000506 | -0.000000122 | 0.000000602  |
| 6  | -0.000000083 | 0.000000279  | 0.000000655  |
| 1  | 0.000000106  | 0.000000333  | 0.000000589  |
| 1  | -0.000001348 | 0.000000182  | 0.000000071  |
| 1  | -0.000000405 | 0.000000451  | 0.000000593  |
| 6  | -0.000000306 | -0.000000372 | -0.000001007 |
| 6  | -0.000000318 | -0.000001245 | -0.000000392 |
| 6  | -0.000000133 | -0.000002352 | -0.000001358 |
| 6  | -0.000000585 | -0.000001234 | -0.000000741 |
| 6  | 0.000000349  | -0.000001181 | -0.000000753 |
| 6  | 0.000000257  | -0.000001013 | -0.000001099 |
| 1  | -0.000000448 | -0.000001177 | -0.000000973 |
| 1  | 0.000000582  | -0.000001137 | -0.000001175 |
| 1  | 0.000000109  | -0.000001206 | -0.000001285 |
| 6  | -0.000000536 | -0.000000803 | -0.000000139 |
| 6  | -0.000001083 | -0.000001405 | -0.000000671 |
| 6  | -0.000000664 | -0.000000488 | 0.000000115  |
| 1  | -0.000000064 | -0.000001025 | -0.000000443 |
| 1  | -0.000001194 | -0.000001188 | -0.000000685 |
| 1  | -0.000001464 | -0.000001085 | -0.000000457 |
| 1  | -0.000001192 | -0.000001344 | -0.000000877 |
| 1  | -0.000000783 | -0.000000338 | -0.000000252 |
| 1  | -0.000000772 | -0.000000775 | -0.000000423 |
| 1  | -0.00000139  | -0.000000597 | -0.000000282 |
| 6  | -0.000000359 | -0.000000559 | -0.000000075 |
| 6  | 0.000000766  | -0.000000802 | -0.000001241 |
| 6  | 0.000000422  | -0.000001503 | -0.000001341 |
| 1  | 0.000000103  | -0.000001099 | -0.000000088 |
| 1  | 0.000001141  | -0.000000864 | -0.000001249 |
| 1  | 0.00000121   | -0.000000089 | -0.000001031 |
| 1  | 0.000000913  | -0.00000113  | -0.000001159 |
| 1  | 0.000000369  | -0.000001403 | -0.000001319 |

|                                                     |              |              |                                    |
|-----------------------------------------------------|--------------|--------------|------------------------------------|
| 1                                                   | 0.00000058   | -0.00000149  | -0.000001546                       |
| 1                                                   | 0.000000635  | -0.000001317 | -0.00000137                        |
| 6                                                   | -0.00000131  | -0.000000676 | 0.000000462                        |
| 6                                                   | -0.00000137  | -0.000000301 | -0.000000101                       |
| 6                                                   | -0.000001398 | -0.000000517 | 0.000000141                        |
| 1                                                   | -0.000001099 | -0.000000477 | -0.000000475                       |
| 1                                                   | -0.000000691 | -0.000000223 | 0.000000168                        |
| 1                                                   | -0.000001488 | -0.000000386 | 0.000000346                        |
| 1                                                   | -0.00000125  | -0.000000089 | 0.000000336                        |
| 1                                                   | -0.000001352 | -0.000000439 | -0.000000104                       |
| 1                                                   | -0.000001378 | -0.000000422 | 0.0000002                          |
| 1                                                   | -0.000001741 | -0.000000584 | -0.000000097                       |
| 6                                                   | 0.000000786  | 0.000000571  | -0.000000464                       |
| 6                                                   | 0.000000178  | -0.000000315 | -0.000000187                       |
| 6                                                   | 0.000000714  | 0.0000004    | -0.000000416                       |
| 1                                                   | 0.000000153  | -0.000000568 | 0.000000131                        |
| 1                                                   | 0.000000386  | -0.000000584 | -0.000000562                       |
| 1                                                   | 0.000000701  | -0.00000029  | -0.000000585                       |
| 1                                                   | 0.000000043  | 0.000000012  | -0.000000112                       |
| 1                                                   | 0.000000798  | 0.000000434  | -0.00000017                        |
| 1                                                   | 0.000000477  | 0.000000266  | 0.000000143                        |
| 1                                                   | 0.000000927  | -0.000000134 | -0.000000112                       |
| 6                                                   | 0.000000531  | 0.000000464  | 0.000000493                        |
| 6                                                   | -0.000000419 | 0.000001092  | 0.000000131                        |
| 6                                                   | 0.000000684  | 0.000000585  | 0.000001051                        |
| 6                                                   | 0.000000967  | 0.000001109  | 0.000000428                        |
| 6                                                   | 0.000000116  | 0.000000962  | 0.000000754                        |
| 1                                                   | 0.000000455  | 0.000000766  | 0.0000008                          |
| 1                                                   | 0.0000003    | 0.000000151  | 0.00000048                         |
| 7                                                   | -0.000000031 | 0.000001238  | -0.000000031                       |
| 8                                                   | 0.000000666  | 0.000001107  | 0.000001219                        |
| 1                                                   | 0.000000875  | 0.000001268  | 0.000000906                        |
| 1                                                   | -0.000000021 | 0.000000402  | 0.000000508                        |
| 17                                                  | 0.000000878  | 0.000001245  | 0.000001067                        |
| <b>Zero-point correction=</b>                       |              |              | <b>1.152791 (Hartree/Particle)</b> |
| <b>Thermal correction to Energy=</b>                |              |              | <b>1.227767</b>                    |
| <b>Thermal correction to Enthalpy=</b>              |              |              | <b>1.228711</b>                    |
| <b>Thermal correction to Gibbs Free Energy=</b>     |              |              | <b>1.029606</b>                    |
| <b>Sum of electronic and zero-point Energies=</b>   |              |              | <b>-4291.532976</b>                |
| <b>Sum of electronic and thermal Energies=</b>      |              |              | <b>-4291.458000</b>                |
| <b>Sum of electronic and thermal Enthalpies=</b>    |              |              | <b>-4291.457056</b>                |
| <b>Sum of electronic and thermal Free Energies=</b> |              |              | <b>-4291.656161</b>                |

F-2b



|    |              |              |              |
|----|--------------|--------------|--------------|
| 6  | 0.000001485  | -0.000003763 | -0.000001434 |
| 6  | -0.000001808 | 0.000000094  | 0.000002087  |
| 7  | -0.000001471 | 0.000003328  | -0.000005093 |
| 7  | -0.00000174  | 0.000002344  | -0.000002774 |
| 16 | -0.000000296 | -0.000000656 | 0.000003148  |
| 8  | -0.000001003 | -0.000000787 | -0.000001119 |
| 8  | -0.000000507 | -0.000000912 | 0.000001879  |
| 6  | 0.000000912  | 0.000002511  | 0.00000184   |
| 6  | 0.000000321  | 0.00000023   | -0.000000451 |
| 6  | -0.00000098  | 0.00000092   | 0.000000302  |
| 6  | -0.000000388 | 0.000001974  | 0.00000194   |
| 6  | 0.000000947  | 0.000001593  | -0.000001048 |
| 6  | -0.000001456 | 0.000000934  | -0.000000317 |
| 1  | 0.000000152  | 0.000001256  | 0.000000098  |
| 1  | 0.000000211  | 0.000001164  | 0.00000042   |
| 1  | -0.000000616 | 0.000001707  | 0.000000656  |
| 1  | -0.000000135 | 0.000001284  | 0.000000248  |
| 6  | -0.00000038  | 0.000001953  | 0.000000353  |
| 1  | -0.000000322 | 0.000001772  | 0.000000651  |
| 1  | 0.000000072  | 0.000001784  | 0.000000743  |
| 1  | -0.00000026  | 0.000001867  | 0.000000624  |
| 6  | 0.000001725  | 0.000001349  | 0.000003085  |
| 1  | -0.000000452 | 0.000000465  | -0.000000893 |
| 1  | 0.000000175  | 0.00000063   | 0.000000155  |
| 16 | 0.000003167  | -0.000004477 | 0.00000389   |
| 8  | 0.000001412  | 0.00000125   | -0.00000059  |
| 8  | 0.000000426  | 0.000001524  | -0.000001741 |
| 6  | 0.00000023   | 0.000000148  | 0.00000062   |
| 6  | 0.000001735  | 0.000000147  | 0.000000814  |
| 6  | 0.000000131  | 0.000000178  | -0.000001258 |
| 6  | 0.000001656  | -0.000001192 | 0.000000289  |
| 1  | 0.000001736  | 0.000000002  | 0.000000374  |
| 6  | 0.000001652  | -0.000000672 | 0.000000846  |
| 1  | 0.000001174  | -0.000000169 | -0.000000157 |
| 6  | 0.000001617  | -0.000000395 | 0.000000552  |
| 1  | 0.000001987  | -0.000000303 | 0.000000623  |
| 1  | 0.000001393  | -0.000000793 | 0.000000127  |
| 6  | 0.000002053  | -0.000001076 | 0.000000295  |
| 1  | 0.000001944  | -0.000000754 | 0.000000585  |
| 1  | 0.000001949  | -0.00000102  | 0.000000123  |
| 1  | 0.000001814  | -0.000000902 | 0.000000014  |
| 6  | 0.000000664  | 0.000000207  | 0.000000915  |
| 1  | 0.000000264  | -0.00000048  | -0.000000288 |
| 6  | -0.000001863 | 0.000000385  | 0.00000103   |

|    |              |              |              |
|----|--------------|--------------|--------------|
| 6  | 0.000000321  | 0.000002639  | 0.000000405  |
| 6  | -0.000001622 | 0.000001477  | -0.000000089 |
| 6  | -0.000001936 | 0.000000983  | -0.000000913 |
| 1  | -0.00000131  | 0.000000192  | 0.000000269  |
| 6  | 0.000000509  | 0.000002183  | 0.000000698  |
| 1  | -0.000000103 | 0.000000902  | 0.000000739  |
| 6  | -0.00000118  | 0.00000073   | 0.000000443  |
| 1  | -0.000001276 | 0.000001258  | 0.00000013   |
| 1  | -0.000000567 | 0.000001597  | 0.000000434  |
| 1  | -0.000001062 | 0.000001795  | 0.000000251  |
| 6  | 0.000001255  | 0.000000407  | 0.000000724  |
| 1  | 0.000001224  | -0.0000001   | -0.000000101 |
| 1  | 0.000001178  | -0.000000785 | 0.000000405  |
| 1  | 0.000000555  | -0.000000396 | 0.000000086  |
| 6  | 0.000000062  | -0.000000362 | 0.000000456  |
| 1  | -0.000000075 | 0.000000298  | 0.000000159  |
| 1  | 0.000000147  | 0.000000947  | 0.000000329  |
| 1  | 0.000000417  | 0.000000145  | 0.000000958  |
| 79 | -0.000000355 | -0.000000919 | -0.000002838 |
| 6  | -0.000004688 | -0.000002231 | 0.000007025  |
| 6  | -0.000000389 | -0.000000453 | -0.000000912 |
| 6  | -0.000000568 | -0.000000809 | -0.000002277 |
| 1  | -0.000000529 | -0.000001229 | -0.000000092 |
| 1  | -0.0000006   | -0.000001084 | -0.000000322 |
| 7  | 0.00000237   | -0.000002134 | -0.000001611 |
| 7  | 0.00000275   | 0.000001319  | -0.000000881 |
| 6  | -0.000001582 | -0.000002371 | -0.00000293  |
| 6  | -0.000000399 | 0.000000623  | -0.000000697 |
| 6  | -0.00000114  | 0.000001421  | -0.000001087 |
| 6  | -0.000000142 | -0.000000843 | 0.000000106  |
| 6  | -0.000001205 | -0.000000559 | -0.000000077 |
| 6  | -0.000000173 | 0.000000009  | 0.00000015   |
| 1  | -0.000000072 | -0.000000923 | -0.000000489 |
| 1  | -0.000001245 | 0.000000106  | -0.00000063  |
| 1  | -0.000000618 | -0.000000076 | -0.000000361 |
| 6  | -0.000000636 | 0.000000964  | 0.00000106   |
| 6  | 0.00000005   | -0.000001018 | -0.000001467 |
| 6  | -0.000000427 | -0.000001447 | -0.000000624 |
| 6  | -0.000000656 | -0.000001065 | -0.000000212 |
| 6  | 0.000000116  | -0.000001129 | -0.000000484 |
| 6  | -0.000000101 | -0.000000882 | -0.000000355 |
| 1  | -0.000000221 | -0.000000629 | -0.00000052  |
| 1  | 0.000000409  | -0.000001089 | -0.000000093 |
| 1  | 0.000000167  | -0.000000889 | -0.00000041  |

|   |              |              |              |
|---|--------------|--------------|--------------|
| 6 | -0.00000206  | -0.00000038  | -0.00000069  |
| 6 | -0.000001134 | -0.00000081  | -0.000000652 |
| 6 | -0.000001478 | -0.000000096 | -0.000000389 |
| 1 | -0.000000594 | -0.000000495 | -0.000000823 |
| 1 | -0.000001004 | -0.000000914 | -0.00000072  |
| 1 | -0.000001291 | -0.000000511 | -0.000000702 |
| 1 | -0.00000096  | -0.000000874 | -0.0000004   |
| 1 | -0.000000319 | -0.000000147 | -0.000000098 |
| 1 | -0.000000285 | -0.000000002 | -0.000000005 |
| 1 | -0.000000881 | 0.000000062  | -0.000000454 |
| 6 | -0.000000429 | -0.000001513 | -0.000000895 |
| 6 | 0.000000435  | -0.000001194 | -0.000000605 |
| 6 | 0.000000381  | -0.000001785 | -0.000000276 |
| 1 | -0.000000016 | -0.000001599 | 0.000000159  |
| 1 | 0.000000377  | -0.000000685 | -0.000000431 |
| 1 | 0.000000859  | -0.000001237 | -0.000000086 |
| 1 | 0.000000905  | -0.000001003 | -0.000000127 |
| 1 | 0.000000166  | -0.000001623 | -0.000000599 |
| 1 | 0.000000475  | -0.000001657 | -0.000000543 |
| 1 | 0.000000486  | -0.000001651 | -0.000000432 |
| 6 | -0.000003491 | 0.000000509  | 0.000000301  |
| 6 | -0.000000453 | -0.000000786 | 0.000000956  |
| 6 | 0.000000012  | -0.000001441 | -0.000000636 |
| 1 | -0.000000474 | -0.000000023 | -0.000000725 |
| 1 | -0.000001024 | 0.000001232  | -0.000001276 |
| 1 | -0.000001118 | 0.000000162  | -0.000000199 |
| 1 | -0.000001325 | -0.000000364 | -0.00000062  |
| 1 | -0.000001057 | -0.00000076  | -0.000000519 |
| 1 | -0.000001719 | -0.000000067 | -0.000000543 |
| 1 | -0.000001483 | -0.000000616 | -0.000000703 |
| 6 | 0.000000246  | -0.000001873 | 0.000000496  |
| 6 | 0.000000111  | -0.000000903 | -0.000000587 |
| 6 | -0.00000079  | 0.000000194  | -0.000000206 |
| 1 | 0.000000619  | -0.000000772 | -0.000000459 |
| 1 | -0.000000032 | -0.00000124  | -0.000000409 |
| 1 | 0.000000474  | -0.000001098 | -0.000000213 |
| 1 | 0.000000355  | -0.000000814 | -0.0000003   |
| 1 | 0.000000638  | -0.000000156 | 0.000000175  |
| 1 | 0.00000078   | -0.000000462 | -0.000000368 |
| 1 | 0.000000801  | -0.00000046  | -0.000000184 |
| 6 | 0.000002694  | 0.000000126  | 0.000000256  |
| 6 | 0.00000116   | 0.000000928  | 0.000001102  |
| 6 | 0.000001098  | 0.000001168  | -0.000000069 |
| 6 | -0.000000051 | 0.000002007  | 0.000000844  |

|    |              |             |              |
|----|--------------|-------------|--------------|
| 6  | 0.000001693  | 0.000000841 | 0.000001521  |
| 1  | 0.00000083   | 0.000001749 | 0.000001045  |
| 1  | -0.000000469 | 0.000000994 | -0.000000151 |
| 7  | -0.000003744 | 0.00000192  | 0.000000441  |
| 8  | 0.000003614  | 0.000002454 | 0.000001379  |
| 1  | 0.000000587  | 0.000001451 | 0.000000825  |
| 1  | 0.000000301  | 0.000000761 | 0.000000418  |
| 17 | -0.000000251 | 0.000001387 | 0.000000035  |

Zero-point correction=

1.154833 (Hartree/Particle)

Thermal correction to Energy=

1.229538

Thermal correction to Enthalpy=

1.230483

Thermal correction to Gibbs Free Energy=

1.033800

Sum of electronic and zero-point Energies=

-4291.550093

Sum of electronic and thermal Energies=

-4291.475387

Sum of electronic and thermal Enthalpies=

-4291.474443

Sum of electronic and thermal Free Energies=

-4291.671126

Re8

|    |              |              |              |
|----|--------------|--------------|--------------|
| 6  | -0.000000673 | 0.000001255  | 0.000001806  |
| 6  | -0.000003083 | -0.000000729 | 0.000001396  |
| 7  | 0.000001891  | 0.000000695  | -0.000000716 |
| 7  | 0.000003874  | 0.000001103  | 0.000001114  |
| 16 | -0.000001663 | 0.000004778  | 0.000002857  |
| 8  | 0.000001188  | 0.000002804  | 0.000000792  |
| 8  | 0.00000112   | 0.000002171  | 0.000000485  |
| 6  | 0.000001543  | 0.00000049   | 0.000001203  |
| 6  | 0.00000421   | 0.00000051   | 0.000001624  |
| 6  | 0.000000864  | 0.00000011   | 0.00000206   |
| 6  | 0.000003437  | 0.00000528   | -0.000002717 |
| 6  | 0.000003572  | -0.000001499 | 0.0000008    |
| 6  | 0.000003348  | -0.000001471 | 0.000000082  |
| 1  | 0.000000978  | 0.000002219  | 0.00000195   |
| 1  | 0.000002631  | 0.000000567  | 0.000000743  |
| 1  | 0.00000256   | 0.000000072  | 0.000000975  |
| 1  | 0.000000864  | 0.000001361  | 0.000000413  |
| 6  | 0.000004273  | 0.000000066  | -0.000000489 |
| 1  | 0.000003356  | -0.000002346 | 0.0000019    |
| 1  | 0.000004245  | -0.000001746 | 0.000001751  |
| 1  | 0.00000308   | -0.000002402 | 0.000000413  |
| 16 | 0.000000884  | -0.000001364 | -0.000001432 |
| 8  | 0.000003298  | 0.000001158  | -0.000000272 |
| 8  | -0.000000911 | -0.000000942 | 0.000001362  |
| 6  | 0.00000038   | -0.000001764 | -0.000002674 |
| 6  | 0.000000342  | -0.000001986 | 0.000000282  |

|   |              |              |              |
|---|--------------|--------------|--------------|
| 6 | -0.00000822  | -0.000001897 | -0.000000595 |
| 6 | 0.000000955  | -0.000001276 | -0.000000546 |
| 1 | 0.000001269  | -0.000001088 | -0.000000147 |
| 6 | -0.000002094 | -0.000003574 | -0.000002102 |
| 1 | -0.000001011 | -0.000001894 | -0.000001383 |
| 6 | 0.000000181  | -0.000003154 | -0.000003134 |
| 1 | 0.000000035  | -0.000001575 | -0.000000761 |
| 1 | -0.000001612 | -0.000002863 | -0.000001944 |
| 6 | -0.000000773 | -0.000003071 | -0.000003772 |
| 1 | -0.000001534 | -0.000002446 | -0.000000245 |
| 1 | -0.00000128  | -0.00000289  | -0.000001149 |
| 1 | -0.000001907 | -0.000004166 | -0.000001832 |
| 6 | -0.000000691 | -0.000002626 | -0.000001673 |
| 1 | -0.000001049 | 0.000000727  | -0.000000265 |
| 6 | -0.000001732 | 0.000001365  | -0.000000112 |
| 1 | -0.000000666 | -0.000000698 | -0.000000293 |
| 1 | -0.00000173  | 0.000000014  | -0.000000887 |
| 1 | -0.000002183 | 0.000000359  | -0.000000141 |
| 6 | -0.000000683 | 0.000000509  | 0.000000143  |
| 1 | 0.000000871  | 0.000001114  | 0.000000095  |
| 1 | 0.000001242  | 0.000000696  | 0.000000304  |
| 1 | 0.000000395  | 0.000001382  | 0.000000561  |
| 6 | -0.000001006 | 0.000001018  | -0.000000037 |
| 6 | -0.000001972 | -0.000000979 | 0.000001203  |
| 1 | -0.000000866 | 0.000002492  | 0.000000928  |
| 1 | -0.000001094 | 0.000000326  | 0.000000477  |
| 6 | -0.000002543 | 0.000003145  | 0.000000013  |
| 1 | -0.000001721 | 0.000001709  | 0.000000802  |
| 1 | -0.000002137 | 0.000001769  | 0.000000053  |
| 6 | -0.000003827 | 0.000001364  | -0.000000026 |
| 1 | -0.000002321 | 0.000000932  | -0.000000452 |
| 1 | -0.000001908 | 0.000001596  | 0.000000708  |
| 1 | -0.000004181 | 0.000001567  | -0.000000267 |
| 1 | -0.000003576 | 0.00000242   | 0.000000279  |
| 1 | -0.00000364  | 0.000001301  | -0.000000013 |

Zero-point correction=

0.497543 (Hartree/Particle)

Thermal correction to Energy=

0.531772

Thermal correction to Enthalpy=

0.532716

Thermal correction to Gibbs Free Energy=

0.423728

Sum of electronic and zero-point Energies=

-2100.647004

Sum of electronic and thermal Energies=

-2100.612775

Sum of electronic and thermal Enthalpies=

-2100.611831

Sum of electronic and thermal Free Energies=

-2100.720819

G-1

|    |              |              |              |
|----|--------------|--------------|--------------|
| 6  | -0.000011935 | -0.000000013 | 0.000001885  |
| 6  | 0.000009607  | 0.000004801  | 0.000000422  |
| 7  | 0.00000183   | 0.000000858  | -0.000002498 |
| 7  | -0.000000494 | -0.000016543 | 0.000006113  |
| 16 | 0.000000085  | -0.000001007 | -0.000000627 |
| 8  | 0.000000683  | -0.000002039 | -0.000000259 |
| 8  | -0.000000349 | -0.000000825 | -0.000001367 |
| 6  | 0.000002241  | -0.000000466 | -0.000000958 |
| 6  | 0.00000197   | -0.000001604 | -0.000000946 |
| 6  | 0.000002834  | -0.000001947 | -0.000001241 |
| 6  | 0.000002542  | -0.000000189 | -0.000001751 |
| 6  | 0.000002598  | -0.000001439 | -0.000000808 |
| 6  | 0.000001667  | -0.000001684 | -0.000000808 |
| 1  | 0.000002105  | -0.000001843 | -0.000001573 |
| 1  | 0.000003398  | -0.000002065 | -0.000001487 |
| 1  | 0.000002438  | -0.000001318 | -0.000000731 |
| 1  | 0.000001804  | -0.000000962 | -0.000000151 |
| 6  | 0.000003685  | -0.000002035 | -0.000001315 |
| 1  | 0.000003614  | -0.000002395 | -0.000001701 |
| 1  | 0.000004125  | -0.000002073 | -0.00000139  |
| 1  | 0.000003841  | -0.000001709 | -0.000001089 |
| 16 | 0.000004281  | 0.000008634  | -0.000003837 |
| 8  | -0.000000175 | 0.000000162  | 0.000001552  |
| 8  | 0.000000097  | 0.000003131  | 0.000000329  |
| 6  | 0.000002493  | 0.000002115  | 0.000002328  |
| 6  | 0.00000271   | -0.000000157 | -0.000000055 |
| 6  | 0.000002223  | 0.000002257  | 0.000001709  |
| 6  | 0.000003206  | 0.000001073  | 0.000001092  |
| 1  | 0.000002209  | 0.000000517  | 0.000000286  |
| 6  | 0.000003486  | 0.000001626  | 0.00000171   |
| 1  | 0.000002495  | 0.000001982  | 0.000001602  |
| 6  | 0.000003805  | 0.000000766  | 0.000000891  |
| 1  | 0.000003607  | 0.000000154  | 0.000000407  |
| 1  | 0.000003716  | 0.000002292  | 0.000001869  |
| 6  | 0.000004641  | 0.00000149   | 0.000001139  |
| 1  | 0.000004846  | 0.000001456  | 0.000001632  |
| 1  | 0.00000498   | 0.000001069  | 0.000001339  |
| 1  | 0.000004827  | 0.000000683  | 0.000000934  |
| 6  | 0.000005347  | 0.000005832  | 0.000002044  |
| 1  | -0.00000021  | 0.000001144  | 0.000001452  |
| 6  | 0.000000022  | 0.000002281  | 0.000002027  |
| 1  | 0.000001236  | 0.00000195   | 0.000002264  |
| 1  | 0.000001573  | 0.00000179   | 0.000001487  |
| 1  | 0.0000006    | 0.000002564  | 0.000001875  |

|    |              |              |              |
|----|--------------|--------------|--------------|
| 6  | -0.000001185 | 0.00000228   | 0.000001178  |
| 1  | -0.000000422 | 0.000001838  | 0.000001264  |
| 1  | 0.000000045  | 0.000001885  | 0.000001845  |
| 1  | -0.000000494 | 0.000002278  | 0.00000191   |
| 6  | 0.000002148  | -0.000001854 | 0.000001321  |
| 6  | 0.00000191   | 0.00000117   | -0.000000673 |
| 1  | 0.000002031  | 0.000000141  | -0.000000554 |
| 1  | 0.000001942  | -0.000000325 | -0.000000087 |
| 6  | 0.000001813  | -0.000000059 | 0.000001026  |
| 1  | 0.000000703  | -0.000000025 | -0.000000117 |
| 1  | 0.000000689  | 0.000000532  | 0.000000391  |
| 6  | 0.000001733  | 0.000000919  | 0.000000274  |
| 1  | 0.000002061  | 0.000000799  | 0.00000077   |
| 1  | 0.000002489  | -0.000000022 | 0.000000105  |
| 1  | 0.000002133  | 0.000000822  | 0.000000884  |
| 1  | 0.000001228  | 0.000000323  | 0.000000412  |
| 1  | 0.000001168  | 0.000000977  | 0.000001042  |
| 79 | -0.000000599 | 0.000001784  | 0.000000616  |
| 6  | -0.000002834 | -0.000000736 | 0.000000632  |
| 6  | -0.000000835 | -0.000000452 | 0.000000649  |
| 6  | -0.000003458 | 0.000000118  | -0.000001486 |
| 1  | -0.000003013 | -0.00000137  | -0.000000829 |
| 1  | -0.000003287 | 0.000000169  | -0.000000127 |
| 7  | -0.000002089 | 0.000000269  | -0.000002775 |
| 7  | -0.000001117 | -0.000002021 | 0.000000265  |
| 6  | -0.000003181 | -0.000000546 | 0.000001645  |
| 6  | -0.000002115 | 0.00000244   | 0.000000272  |
| 6  | -0.000000539 | 0.000001374  | 0.000001392  |
| 6  | 0.00000038   | 0.000001465  | 0.000000805  |
| 6  | -0.000003317 | 0.000003005  | 0.000000579  |
| 6  | -0.000002376 | 0.000000362  | 0.000001971  |
| 1  | -0.000001374 | 0.000001527  | 0.000001174  |
| 1  | -0.000002154 | 0.00000187   | 0.0000014    |
| 1  | -0.000001544 | 0.000002684  | 0.000001782  |
| 6  | -0.000002089 | -0.000002446 | -0.000001937 |
| 6  | -0.000002163 | -0.000000423 | -0.000001033 |
| 6  | -0.000000273 | -0.000002414 | -0.000002246 |
| 6  | -0.000001167 | -0.000001624 | -0.000001495 |
| 6  | -0.000001425 | -0.000001419 | -0.000002294 |
| 6  | -0.000001363 | -0.000002872 | -0.00000173  |
| 1  | -0.000002082 | -0.000001893 | -0.000001813 |
| 1  | -0.000000794 | -0.000002893 | -0.00000212  |
| 1  | -0.000001168 | -0.000002533 | -0.000002282 |
| 6  | -0.000002797 | -0.000000876 | -0.000000208 |

|   |              |              |              |
|---|--------------|--------------|--------------|
| 6 | -0.000002864 | -0.000001279 | -0.000001002 |
| 6 | -0.000001982 | -0.000000806 | -0.000001898 |
| 1 | -0.000002613 | -0.000000279 | -0.000000061 |
| 1 | -0.000003546 | -0.000001057 | -0.000001144 |
| 1 | -0.000003501 | -0.000000598 | -0.000000781 |
| 1 | -0.000002983 | -0.000001313 | -0.000001339 |
| 1 | -0.000001258 | -0.000000591 | -0.000000384 |
| 1 | -0.000001823 | -0.000001011 | -0.000000831 |
| 1 | -0.000002099 | -0.000000191 | -0.000000126 |
| 6 | -0.000000976 | -0.000001212 | -0.000001663 |
| 6 | -0.000000679 | -0.000001559 | -0.000001118 |
| 6 | -0.00000184  | -0.000002011 | -0.000001179 |
| 1 | -0.000001238 | -0.000001214 | -0.000001192 |
| 1 | 0.00000072   | -0.000001803 | -0.000002129 |
| 1 | -0.000000168 | -0.00000018  | -0.000001364 |
| 1 | 0.000000033  | -0.000002496 | -0.000001876 |
| 1 | -0.000002344 | -0.000002114 | -0.000001884 |
| 1 | -0.000001511 | -0.000002558 | -0.000002408 |
| 1 | -0.000001546 | -0.000001994 | -0.000001715 |
| 6 | -0.000002665 | 0.000001097  | 0.000001095  |
| 6 | -0.00000208  | 0.000001362  | 0.000000687  |
| 6 | -0.00000035  | 0.000001585  | 0.000001071  |
| 1 | -0.000002818 | 0.000000443  | 0.000000263  |
| 1 | -0.000001688 | 0.000001102  | 0.000000605  |
| 1 | -0.000002652 | 0.000001165  | 0.000000743  |
| 1 | -0.000002245 | 0.000001739  | 0.000001278  |
| 1 | -0.000003783 | 0.000001187  | 0.000000634  |
| 1 | -0.000003693 | 0.000001713  | 0.000001065  |
| 1 | -0.000003855 | 0.000001197  | 0.000000675  |
| 6 | -0.00000141  | 0.000000313  | 0.000000923  |
| 6 | -0.000001624 | 0.000000032  | -0.000000705 |
| 6 | 0.000000783  | 0.000000356  | 0.000000474  |
| 1 | -0.000001251 | -0.000000251 | -0.000000436 |
| 1 | -0.000002317 | 0.000000187  | 0.000000141  |
| 1 | -0.00000153  | -0.000000099 | -0.000000151 |
| 1 | -0.000001681 | 0.000000681  | 0.000000678  |
| 1 | -0.000000538 | 0.000000372  | -0.000000558 |
| 1 | -0.000000434 | 0.000000673  | 0.000000746  |
| 1 | -0.000000323 | -0.000000097 | -0.000000177 |

Zero-point correction=

1.071576 (Hartree/Particle)

Thermal correction to Energy=

1.139791

Thermal correction to Enthalpy=

1.140736

Thermal correction to Gibbs Free Energy=

0.955651

Sum of electronic and zero-point Energies=

-3395.499026



|                                              |              |
|----------------------------------------------|--------------|
| Sum of electronic and thermal Energies=      | -3395.430811 |
| Sum of electronic and thermal Enthalpies=    | -3395.429867 |
| Sum of electronic and thermal Free Energies= | -3395.614952 |

G-2

|    |              |              |              |
|----|--------------|--------------|--------------|
| 6  | 0.000004564  | -0.000007401 | 0.000006636  |
| 6  | -0.000007169 | 0.000008822  | -0.000005451 |
| 7  | 0.000003807  | 0.000016714  | -0.000006645 |
| 7  | 0.000001285  | -0.000005399 | -0.00000128  |
| 16 | -0.00000564  | -0.000008273 | 0.000002029  |
| 8  | -0.000001405 | 0.000002403  | 0.000002121  |
| 8  | -0.0000027   | 0.000001246  | 0.000000296  |
| 6  | -0.000001169 | 0.000000674  | 0.000001511  |
| 6  | -0.000001414 | 0.000002003  | -0.000000093 |
| 6  | -0.000003016 | 0.00000243   | 0.000000957  |
| 6  | -0.000002947 | 0.000001083  | 0.000000887  |
| 6  | -0.000003825 | 0.000000552  | 0.00000036   |
| 6  | -0.000001773 | 0.000000562  | -0.00000006  |
| 1  | -0.000002303 | 0.000000811  | 0.00000197   |
| 1  | -0.000002866 | 0.000001652  | 0.000001528  |
| 1  | -0.000003401 | 0.000000238  | 0.000000212  |
| 1  | -0.000002996 | 0.000000017  | 0.000000822  |
| 6  | -0.000004061 | 0.000001373  | 0.000000762  |
| 1  | -0.000003785 | 0.00000122   | 0.000000947  |
| 1  | -0.000003967 | 0.000001396  | 0.00000127   |
| 1  | -0.000004015 | 0.000001143  | 0.000000394  |
| 16 | -0.000003673 | 0.000002538  | 0.000003171  |
| 8  | -0.000001532 | -0.000003384 | -0.000004939 |
| 8  | 0.000000237  | -0.000001453 | -0.000001417 |
| 6  | 0.000000015  | -0.000001179 | -0.000000146 |
| 6  | -0.000000206 | -0.000000021 | -0.00000209  |
| 6  | -0.000002772 | -0.000002758 | -0.000002699 |
| 6  | -0.000002403 | -0.000001568 | -0.00000108  |
| 1  | -0.000000878 | -0.000001287 | 0.000000678  |
| 6  | -0.000002815 | -0.000001255 | -0.000001175 |
| 1  | -0.0000015   | -0.000001639 | -0.00000115  |
| 6  | -0.000001314 | -0.000001988 | 0.000000494  |
| 1  | -0.000001823 | -0.000000055 | -0.000000115 |
| 1  | -0.000001998 | -0.000001706 | -0.000001568 |
| 6  | -0.00000243  | -0.000000629 | -0.000001893 |
| 1  | -0.000002939 | -0.000001417 | -0.000001177 |
| 1  | -0.000002437 | -0.00000104  | -0.000001063 |
| 1  | -0.000002939 | -0.000000858 | -0.000000544 |
| 6  | 0.000000297  | 0.000000073  | -0.000002869 |

|    |              |              |              |
|----|--------------|--------------|--------------|
| 1  | -0.000002101 | 0.000000284  | -0.000000584 |
| 6  | -0.000003818 | -0.000000755 | 0.000000286  |
| 1  | -0.000001825 | -0.000001901 | -0.000001809 |
| 1  | -0.000002302 | -0.000000198 | 0.000000412  |
| 1  | -0.000001207 | -0.000000131 | -0.000001072 |
| 6  | -0.000001285 | -0.000001364 | -0.000001719 |
| 1  | -0.000001036 | -0.000001042 | -0.000000537 |
| 1  | -0.000001591 | -0.000000877 | -0.000001361 |
| 1  | -0.000001681 | -0.000000982 | -0.000000475 |
| 6  | 0.000000799  | -0.000006795 | 0.000006025  |
| 6  | -0.000000189 | 0.000001988  | -0.000000515 |
| 1  | -0.000000933 | 0.000002507  | -0.000000702 |
| 1  | -0.000000968 | 0.000001478  | 0.000001079  |
| 6  | 0.000000806  | 0.000000105  | 0.000001138  |
| 1  | 0.000000863  | 0.000000512  | 0.000000564  |
| 1  | -0.000000054 | 0.000000072  | 0.000000158  |
| 6  | -0.000000259 | 0.000000911  | 0.000000267  |
| 1  | -0.000000701 | 0.000001183  | 0.000000808  |
| 1  | 0.000000298  | 0.000001278  | 0.000001132  |
| 1  | 0.000000189  | 0.000000057  | 0.000000621  |
| 1  | 0.000000412  | 0.000000163  | 0.000000035  |
| 1  | 0.000000143  | 0.000000662  | 0.000000293  |
| 79 | 0.000002983  | -0.000001322 | 0.000002165  |
| 6  | 0.000001108  | 0.000003943  | -0.000001956 |
| 6  | 0.000003883  | -0.000001771 | -0.000000228 |
| 6  | 0.000000652  | 0.000000219  | 0.000000797  |
| 1  | 0.000002672  | 0.000000058  | 0.000000668  |
| 1  | 0.000003258  | 0.000001507  | -0.000000783 |
| 7  | 0.000001813  | -0.000002281 | 0.000000037  |
| 7  | 0.000002673  | 0.000000215  | -0.000000265 |
| 6  | 0.000001048  | 0.000000686  | 0.000001     |
| 6  | 0.000003087  | -0.000004486 | 0.000001061  |
| 6  | -0.00000153  | -0.000002931 | -0.00000363  |
| 6  | -0.000000696 | -0.000001229 | -0.000001685 |
| 6  | 0.000002994  | -0.000002977 | -0.000000033 |
| 6  | 0.00000184   | -0.000000594 | -0.000001772 |
| 1  | 0.000000772  | -0.000000675 | -0.000001044 |
| 1  | 0.000001071  | -0.000002242 | -0.000001356 |
| 1  | 0.000000831  | -0.000002053 | -0.000001256 |
| 6  | 0.000000466  | -0.000002317 | 0.000000907  |
| 6  | 0.000001112  | 0.000004227  | 0.000000405  |
| 6  | 0.000001606  | 0.000002813  | 0.00000373   |
| 6  | 0.000003434  | 0.000001103  | 0.000000916  |
| 6  | -0.000000385 | 0.000001915  | 0.000000094  |

|   |              |              |              |
|---|--------------|--------------|--------------|
| 6 | 0.000001044  | 0.000000145  | 0.000001441  |
| 1 | 0.00000143   | 0.000001499  | 0.000000772  |
| 1 | 0.000001214  | 0.000001425  | 0.000000782  |
| 1 | 0.000000815  | 0.000002234  | 0.000001642  |
| 6 | 0.000002408  | -0.000000747 | 0.00000102   |
| 6 | 0.000003089  | 0.000000933  | 0.000000236  |
| 6 | 0.000000492  | -0.000000364 | 0.000001033  |
| 1 | 0.000001728  | 0.000000575  | -0.000000947 |
| 1 | 0.000003065  | 0.000000584  | 0.000000695  |
| 1 | 0.000002872  | 0.000000066  | 0.0000002    |
| 1 | 0.000002611  | 0.000000078  | 0.000000654  |
| 1 | 0.000001365  | -0.000000079 | -0.000000225 |
| 1 | 0.000001266  | 0.000000458  | -0.000000014 |
| 1 | 0.000002032  | -0.000000121 | -0.000000215 |
| 6 | 0.000002682  | -0.000000067 | -0.000002058 |
| 6 | -0.000000541 | 0.000002208  | 0.000001799  |
| 6 | -0.000000343 | 0.000002278  | 0.000000306  |
| 1 | 0.000001561  | -0.000000166 | 0.000000059  |
| 1 | 0.000000766  | 0.000001104  | 0.000001243  |
| 1 | -0.000000033 | 0.000001401  | 0.000001135  |
| 1 | -0.000000225 | 0.000000804  | 0.000001377  |
| 1 | 0.000001779  | 0.00000174   | 0.00000136   |
| 1 | 0.00000178   | 0.000002581  | 0.000001103  |
| 1 | 0.000001001  | 0.000001967  | 0.000001786  |
| 6 | 0.000002586  | 0.000000458  | 0.00000194   |
| 6 | 0.000001342  | -0.000001407 | -0.000002947 |
| 6 | 0.000002435  | -0.000001582 | -0.000000634 |
| 1 | 0.000001805  | -0.000001186 | -0.000000082 |
| 1 | 0.000001163  | -0.000001425 | -0.000000046 |
| 1 | 0.000002387  | -0.000001405 | -0.000000931 |
| 1 | 0.000001378  | -0.000001581 | -0.000001479 |
| 1 | 0.000002768  | -0.000001253 | -0.000001042 |
| 1 | 0.000002506  | -0.000001742 | -0.00000156  |
| 1 | 0.000002882  | -0.000001416 | -0.000001386 |
| 6 | 0.000000563  | 0.00000209   | 0.000001673  |
| 6 | 0.000000096  | -0.000000677 | -0.000001348 |
| 6 | 0.000000631  | -0.000001077 | -0.000000504 |
| 1 | 0.000001259  | -0.000000068 | -0.000001147 |
| 1 | 0.000001613  | -0.000000082 | 0.000000341  |
| 1 | 0.000001198  | 0.000000346  | 0.000000356  |
| 1 | 0.000001611  | -0.000000829 | -0.000000684 |
| 1 | -0.000000416 | 0.000000782  | 0.000000541  |
| 1 | -0.000000362 | -0.000000709 | 0.000000171  |
| 1 | -0.000000027 | 0.000000036  | 0.000000557  |

|                                              |                             |
|----------------------------------------------|-----------------------------|
| Zero-point correction=                       | 1.072324 (Hartree/Particle) |
| Thermal correction to Energy=                | 1.140131                    |
| Thermal correction to Enthalpy=              | 1.141075                    |
| Thermal correction to Gibbs Free Energy=     | 0.959431                    |
| Sum of electronic and zero-point Energies=   | -3395.499247                |
| Sum of electronic and thermal Energies=      | -3395.431441                |
| Sum of electronic and thermal Enthalpies=    | -3395.430497                |
| Sum of electronic and thermal Free Energies= | -3395.612140                |

G-TS1a

|    |              |              |              |
|----|--------------|--------------|--------------|
| 6  | -0.00000338  | 0.000001185  | 0.000000709  |
| 6  | 0.00000002   | 0.000000897  | 0.000001632  |
| 7  | -0.000001356 | 0.000000242  | 0.000000498  |
| 7  | 0.000000026  | 0.000000945  | 0.000001465  |
| 16 | -0.000000974 | -0.000000041 | 0.000000458  |
| 8  | -0.000001421 | 0.00000014   | -0.000000516 |
| 8  | -0.000000638 | 0.000000137  | 0.000000029  |
| 6  | -0.00000183  | 0.000000749  | 0.000000462  |
| 6  | -0.00000278  | 0.000000056  | -0.000000153 |
| 6  | -0.00000297  | 0.000000935  | 0.000000447  |
| 6  | -0.000002751 | 0.00000102   | 0.000001292  |
| 6  | -0.000002049 | 0.000000744  | 0.00000102   |
| 6  | -0.000001353 | 0.000001312  | 0.000001012  |
| 1  | -0.00000268  | 0.000000315  | -0.000000194 |
| 1  | -0.000003417 | 0.000000752  | 0.000000329  |
| 1  | -0.000001773 | 0.000001283  | 0.000001735  |
| 1  | -0.00000106  | 0.000000986  | 0.000001291  |
| 6  | -0.000003191 | 0.000001363  | 0.000001597  |
| 1  | -0.000002725 | 0.000001228  | 0.00000082   |
| 1  | -0.000003711 | 0.00000126   | 0.000000834  |
| 1  | -0.000003036 | 0.000001763  | 0.000001719  |
| 16 | 0.000000059  | 0.000001462  | 0.000001963  |
| 8  | 0.000000189  | 0.000001726  | 0.000002789  |
| 8  | -0.000000445 | 0.000001046  | 0.00000188   |
| 6  | 0.000001256  | 0.00000063   | 0.000001507  |
| 6  | 0.000001407  | 0.000001262  | 0.000002236  |
| 6  | 0.000001098  | 0.000000481  | 0.000001497  |
| 6  | 0.000002535  | 0.000000563  | 0.000002118  |
| 1  | 0.000001448  | 0.000001357  | 0.000002457  |
| 6  | 0.000001244  | 0.000000428  | 0.000001048  |
| 1  | 0.000000196  | 0.000000522  | 0.000000801  |
| 6  | 0.000002251  | 0.0000001    | 0.000001005  |
| 1  | 0.000002606  | 0.000000874  | 0.000002094  |
| 1  | 0.000001113  | 0.000000177  | 0.000000403  |

|    |              |              |              |
|----|--------------|--------------|--------------|
| 6  | 0.000002682  | 0.000000101  | 0.000000775  |
| 1  | 0.000002591  | -0.000000187 | 0.000000494  |
| 1  | 0.000002631  | 0.000000228  | 0.000000992  |
| 1  | 0.000003222  | 0.000000187  | 0.00000124   |
| 6  | -0.000000203 | 0.000001446  | 0.000002169  |
| 1  | -0.000000531 | 0.000001656  | 0.000002517  |
| 6  | 0.000000574  | 0.000001468  | 0.000002486  |
| 1  | 0.000000646  | 0.000001232  | 0.000002239  |
| 1  | 0.000000875  | 0.000001502  | 0.000002754  |
| 1  | 0.000000265  | 0.000001778  | 0.000002903  |
| 6  | -0.000000629 | 0.0000013    | 0.000001905  |
| 1  | -0.000001229 | 0.000001256  | 0.000001677  |
| 1  | -0.000000508 | 0.000000931  | 0.000001499  |
| 1  | -0.000000835 | 0.000001522  | 0.000002247  |
| 6  | -0.000001734 | 0.000001024  | 0.00000062   |
| 6  | -0.000002024 | 0.000000784  | 0.000000629  |
| 1  | -0.000001963 | 0.000000848  | 0.000001149  |
| 1  | -0.000001516 | 0.000001276  | 0.000001492  |
| 6  | -0.000002707 | 0.000001141  | 0.000001016  |
| 1  | -0.000002196 | 0.000000472  | 0.000000158  |
| 1  | -0.000001632 | 0.0000007    | 0.000000655  |
| 6  | -0.000003066 | 0.000000989  | 0.00000072   |
| 1  | -0.000002472 | 0.000001352  | 0.000001538  |
| 1  | -0.000003047 | 0.000001188  | 0.000001059  |
| 1  | -0.000003527 | 0.000001225  | 0.000000972  |
| 1  | -0.00000329  | 0.000000725  | 0.000000244  |
| 1  | -0.000002729 | 0.000000893  | 0.000000645  |
| 79 | 0.000000137  | -0.000000141 | -0.000000265 |
| 6  | 0.000000356  | -0.000000415 | -0.000001051 |
| 6  | 0.000000659  | -0.000001228 | -0.000001902 |
| 6  | 0.000000561  | -0.000001422 | -0.000002176 |
| 1  | 0.000000288  | -0.000001736 | -0.000002668 |
| 1  | 0.000001188  | -0.000001604 | -0.000002208 |
| 7  | 0.000000709  | -0.000001213 | -0.000001507 |
| 7  | -0.000000218 | -0.00000093  | -0.000001677 |
| 6  | 0.000001295  | -0.000000696 | -0.000000508 |
| 6  | 0.000001928  | -0.000000779 | -0.000000893 |
| 6  | 0.000001091  | -0.00000093  | -0.000000767 |
| 6  | 0.000002645  | -0.00000095  | -0.000000478 |
| 6  | 0.000001431  | -0.000000432 | -0.000000473 |
| 6  | 0.000002147  | -0.000000608 | -0.000000049 |
| 1  | 0.000002866  | -0.000000593 | -0.000000378 |
| 1  | 0.000001237  | -0.000000443 | -0.000000496 |
| 1  | 0.000002567  | -0.000000425 | -0.000000005 |

|   |              |              |              |
|---|--------------|--------------|--------------|
| 6 | -0.00000558  | -0.00000122  | -0.0000017   |
| 6 | -0.000001181 | -0.000000854 | -0.00000195  |
| 6 | -0.000000395 | -0.000001023 | -0.000001534 |
| 6 | -0.000001817 | -0.000001087 | -0.000001977 |
| 6 | -0.000000773 | -0.000001048 | -0.000001959 |
| 6 | -0.000001638 | -0.000000851 | -0.000001933 |
| 1 | -0.000002298 | -0.000000898 | -0.000002117 |
| 1 | -0.000000698 | -0.000000925 | -0.000001784 |
| 1 | -0.000001984 | -0.00000088  | -0.000002048 |
| 6 | -0.00000138  | -0.000000957 | -0.000002067 |
| 6 | -0.000001691 | -0.000001373 | -0.000002685 |
| 6 | -0.00000199  | -0.000000548 | -0.000001583 |
| 1 | -0.000000846 | -0.000000891 | -0.000001803 |
| 1 | -0.000001223 | -0.000001596 | -0.000002953 |
| 1 | -0.000001814 | -0.000001353 | -0.000002706 |
| 1 | -0.00000218  | -0.000001367 | -0.000002826 |
| 1 | -0.000001952 | -0.000000309 | -0.000001079 |
| 1 | -0.000002521 | -0.000000615 | -0.000001722 |
| 1 | -0.000002141 | -0.000000605 | -0.000001573 |
| 6 | 0.000000257  | -0.000000975 | -0.00000157  |
| 6 | 0.000000461  | -0.000000617 | -0.000001055 |
| 6 | 0.0000007    | -0.00000147  | -0.000002069 |
| 1 | 0.000000852  | -0.000001019 | -0.0000013   |
| 1 | 0.000000397  | -0.000000473 | -0.000000533 |
| 1 | 0.000001084  | -0.000000812 | -0.000000964 |
| 1 | 0.000000281  | -0.000000821 | -0.000001223 |
| 1 | 0.000000791  | -0.000001655 | -0.000002511 |
| 1 | 0.000000522  | -0.000001526 | -0.000002268 |
| 1 | 0.000001394  | -0.000001489 | -0.000002075 |
| 6 | 0.000000257  | -0.000000829 | -0.000001126 |
| 6 | -0.000000233 | -0.000000298 | -0.000000588 |
| 6 | 0.000000375  | -0.000001072 | -0.000001584 |
| 1 | 0.000000111  | -0.000000792 | -0.000001275 |
| 1 | -0.000000146 | -0.000000079 | -0.000000335 |
| 1 | -0.000000724 | -0.000000363 | -0.000000788 |
| 1 | 0.000000143  | -0.000000154 | -0.000000257 |
| 1 | 0.000000668  | -0.000001319 | -0.000001966 |
| 1 | 0.00000062   | -0.000000905 | -0.000001406 |
| 1 | -0.000000141 | -0.000001059 | -0.000001766 |
| 6 | 0.000002255  | -0.000000924 | -0.000001128 |
| 6 | 0.000002903  | -0.000001266 | -0.000001314 |
| 6 | 0.000002421  | -0.000000696 | -0.000000389 |
| 1 | 0.00000174   | -0.000000974 | -0.000001076 |
| 1 | 0.000002723  | -0.000001547 | -0.000001676 |

|    |             |              |              |
|----|-------------|--------------|--------------|
| 1  | 0.00000308  | -0.000001408 | -0.000001436 |
| 1  | 0.000003399 | -0.000001312 | -0.00000097  |
| 1  | 0.000002117 | -0.000000309 | 0.000000048  |
| 1  | 0.00000288  | -0.00000058  | 0.000000025  |
| 1  | 0.000002635 | -0.0000007   | -0.000000474 |
| 6  | 0.000001648 | 0.000000383  | 0.000000882  |
| 6  | 0.000002333 | 0.00000031   | 0.000001381  |
| 6  | 0.000002563 | 0.00000068   | 0.000001557  |
| 6  | 0.00000222  | 0.000000464  | 0.000001218  |
| 6  | 0.000001326 | 0.000000254  | 0.000001438  |
| 1  | 0.000003093 | 0.000000575  | 0.000001846  |
| 1  | 0.000001219 | 0.000000318  | 0.000000968  |
| 7  | 0.000001237 | 0.000000444  | 0.00000081   |
| 8  | 0.000000439 | 0.00000041   | 0.000000981  |
| 1  | 0.000002266 | 0.000000603  | 0.000001636  |
| 1  | 0.000002639 | 0.000000384  | 0.000001542  |
| 17 | 0.000000793 | 0.000000627  | 0.000001206  |

Zero-point correction=

1.156519 (Hartree/Particle)

Thermal correction to Energy=

1.231225

Thermal correction to Enthalpy=

1.232169

Thermal correction to Gibbs Free Energy=

1.036316

Sum of electronic and zero-point Energies=

-4178.423273

Sum of electronic and thermal Energies=

-4178.348567

Sum of electronic and thermal Enthalpies=

-4178.347622

Sum of electronic and thermal Free Energies=

-4178.543476

G-1a

|    |              |              |              |
|----|--------------|--------------|--------------|
| 6  | -0.000011395 | 0.000004494  | 0.000002948  |
| 6  | 0.000004918  | -0.000008041 | 0.000002314  |
| 7  | 0.000003309  | -0.000003623 | -0.000003287 |
| 7  | 0.000001542  | 0.000002325  | 0.000004702  |
| 16 | -0.000001621 | 0.000002748  | -0.000001388 |
| 8  | -0.000000244 | 0.000000105  | -0.00000211  |
| 8  | 0.00000083   | 0.000001     | -0.000000775 |
| 6  | -0.000000919 | 0.000002411  | 0.000000027  |
| 6  | 0.000002349  | 0.000000609  | -0.000002668 |
| 6  | -0.000000975 | 0.000000213  | -0.000002725 |
| 6  | -0.000000626 | 0.000003268  | -0.000001143 |
| 6  | 0.000001253  | 0.00000043   | -0.00000242  |
| 6  | 0.000000022  | 0.00000041   | -0.000002038 |
| 1  | -0.000000097 | 0.000001137  | -0.000001647 |
| 1  | 0.000000105  | 0.000001626  | -0.000002361 |
| 1  | -0.000000063 | 0.000001253  | -0.000001827 |
| 1  | 0.000000038  | 0.000000024  | -0.000001067 |

|    |              |              |              |
|----|--------------|--------------|--------------|
| 6  | 0.00000136   | 0.000001473  | -0.000003029 |
| 1  | 0.000000453  | 0.000001716  | -0.000002812 |
| 1  | -0.000000262 | 0.000001892  | -0.000002962 |
| 1  | -0.000000266 | 0.00000177   | -0.000002643 |
| 16 | 0.000004079  | -0.000001166 | -0.00000037  |
| 8  | -0.00000151  | -0.00000164  | -0.000000395 |
| 8  | -0.000004565 | 0.000002537  | 0.000000863  |
| 6  | -0.000001237 | 0.000002482  | -0.000000799 |
| 6  | -0.000000889 | -0.000001633 | 0.000001669  |
| 6  | 0.000000439  | -0.000000719 | -0.000000301 |
| 6  | 0.000000107  | 0.000001376  | -0.000001201 |
| 1  | -0.000000808 | 0.000000341  | 0.000000947  |
| 6  | -0.000000792 | 0.000001037  | 0.000000306  |
| 1  | 0.000000801  | 0.000000861  | -0.000001123 |
| 6  | 0.000002131  | -0.000003559 | 0.000000845  |
| 1  | 0.000000366  | -0.000000385 | 0.000000652  |
| 1  | 0.000001393  | 0.000000013  | 0.000000185  |
| 6  | 0.000002249  | 0.000000474  | 0.000000549  |
| 1  | 0.000001047  | -0.000000816 | 0.000000404  |
| 1  | 0.000000616  | -0.000000164 | 0.000000232  |
| 1  | 0.000000588  | -0.000001098 | 0.000000634  |
| 6  | -0.000007056 | 0.000003699  | -0.000006127 |
| 1  | -0.000002764 | -0.000000625 | 0.000000711  |
| 6  | -0.000000309 | -0.00000386  | 0.000002196  |
| 1  | -0.000001586 | 0.000000551  | 0.00000104   |
| 1  | -0.000001023 | 0.000000505  | 0.000000833  |
| 1  | -0.000001979 | 0.000000368  | 0.000000764  |
| 6  | -0.000001296 | 0.000000526  | 0.000004147  |
| 1  | -0.000001093 | 0.000000959  | 0.000000308  |
| 1  | -0.000002475 | -0.000000683 | -0.000000199 |
| 1  | -0.000002595 | 0.000000048  | -0.000000281 |
| 6  | -0.000001863 | -0.000000668 | 0.000000129  |
| 6  | -0.000001789 | 0.000001191  | -0.000001179 |
| 1  | -0.000000237 | 0.000000541  | -0.000000865 |
| 1  | -0.000001129 | 0.000000076  | -0.000000683 |
| 6  | -0.000001961 | 0.000001192  | 0.000000033  |
| 1  | -0.000000654 | 0.000000494  | -0.000000833 |
| 1  | -0.000000957 | 0.000000726  | -0.000000454 |
| 6  | -0.000001878 | 0.000000753  | -0.000001275 |
| 1  | -0.000001572 | 0.000000914  | -0.000001195 |
| 1  | -0.000001463 | 0.000001346  | -0.000001364 |
| 1  | -0.000002267 | 0.000001237  | -0.000001108 |
| 1  | -0.000001559 | 0.000001096  | -0.000001113 |
| 1  | -0.000001988 | 0.000000804  | -0.000000557 |



|    |              |              |              |
|----|--------------|--------------|--------------|
| 79 | 0.000003908  | 0.000003135  | 0.000003566  |
| 6  | -0.000003067 | -0.000002507 | -0.000008898 |
| 6  | -0.000000597 | -0.000002475 | 0.000004897  |
| 6  | 0.000003643  | 0.000000026  | -0.000002726 |
| 1  | 0.000000532  | -0.000000677 | 0.000000435  |
| 1  | 0.00000114   | -0.00000039  | 0.000001107  |
| 7  | 0.00000245   | -0.000001108 | 0.000004008  |
| 7  | 0.000000458  | 0.000002801  | 0.000006539  |
| 6  | -0.0000015   | -0.000001387 | 0.000001108  |
| 6  | -0.000000047 | -0.000004104 | 0.000001382  |
| 6  | -0.000001704 | 0.000001756  | -0.000001991 |
| 6  | -0.000001318 | 0.000000115  | -0.000000093 |
| 6  | 0.000002722  | -0.000002797 | 0.000001118  |
| 6  | -0.000001136 | -0.000002021 | 0.000004887  |
| 1  | 0.000000734  | -0.000000968 | 0.000002455  |
| 1  | -0.000001254 | -0.000000784 | 0.000001893  |
| 1  | -0.000000555 | -0.000001435 | 0.000002043  |
| 6  | 0.000000866  | -0.000002847 | -0.000003787 |
| 6  | 0.000002055  | 0.000000898  | 0.000000001  |
| 6  | -0.000000307 | 0.000000319  | -0.000000795 |
| 6  | 0.00000093   | 0.000001142  | -0.000000834 |
| 6  | 0.000002612  | -0.000000849 | -0.000001214 |
| 6  | 0.000001603  | 0.000000683  | -0.000000603 |
| 1  | 0.000000698  | 0.000001201  | -0.000001666 |
| 1  | 0.000001086  | -0.000000053 | -0.000001122 |
| 1  | 0.000001362  | 0.000000704  | -0.000001961 |
| 6  | 0.000001351  | 0.000004485  | -0.000002999 |
| 6  | 0.000000688  | -0.000002339 | -0.000000604 |
| 6  | -0.00000201  | -0.00000178  | 0.000001452  |
| 1  | 0.000000309  | -0.000000093 | 0.000000066  |
| 1  | 0.000000499  | 0.000000654  | -0.000000262 |
| 1  | -0.000000109 | 0.000000471  | -0.000000378 |
| 1  | 0.000000558  | 0.000000974  | -0.000000713 |
| 1  | -0.0000002   | 0.000001292  | -0.000000084 |
| 1  | 0.000000099  | 0.000000819  | -0.000001833 |
| 1  | -0.000000185 | 0.000000722  | -0.000000991 |
| 6  | 0.000002234  | -0.00000235  | -0.000000398 |
| 6  | 0.000001782  | 0.000001034  | -0.000000432 |
| 6  | 0.000002513  | 0.000000935  | 0.000000104  |
| 1  | 0.000000145  | -0.00000048  | -0.000000132 |
| 1  | 0.000001623  | -0.000000422 | 0.000000053  |
| 1  | 0.000001709  | 0.000000002  | 0.000000045  |
| 1  | 0.000002105  | 0.000000032  | -0.000001044 |
| 1  | 0.000002089  | -0.000000793 | -0.000000081 |

|    |              |              |              |
|----|--------------|--------------|--------------|
| 1  | 0.000001922  | -0.000000617 | -0.000000104 |
| 1  | 0.000002375  | -0.000000513 | -0.000000067 |
| 6  | 0.000000929  | 0.000000365  | 0.000002421  |
| 6  | -0.000002913 | -0.000000795 | -0.000000278 |
| 6  | -0.000001171 | -0.000001481 | 0.000001758  |
| 1  | 0.000000549  | 0.000001857  | -0.000000088 |
| 1  | -0.000000702 | -0.000000593 | 0.00000134   |
| 1  | -0.000001668 | -0.000000503 | 0.000000811  |
| 1  | 0.00000022   | -0.000000446 | 0.000000324  |
| 1  | -0.000000598 | -0.000000876 | 0.000000862  |
| 1  | -0.000001319 | 0.000000289  | 0.000002346  |
| 1  | -0.000001177 | -0.000000898 | 0.00000085   |
| 6  | 0.000003638  | 0.000001151  | 0.000001104  |
| 6  | 0.000001293  | -0.000001244 | 0.000001961  |
| 6  | 0.000000771  | -0.000001948 | -0.000000411 |
| 1  | 0.000000237  | -0.000000481 | 0.000001202  |
| 1  | 0.000000848  | -0.000001659 | 0.000001841  |
| 1  | 0.0000017    | -0.000001522 | 0.000001582  |
| 1  | 0.000001219  | -0.000001268 | 0.000001853  |
| 1  | 0.000002309  | -0.000001124 | 0.000000917  |
| 1  | 0.000000222  | -0.000001518 | 0.000001917  |
| 1  | 0.000001508  | -0.000001133 | 0.000001288  |
| 6  | 0.00000057   | 0.000001123  | -0.000003595 |
| 6  | -0.000001107 | -0.000001755 | 0.000001887  |
| 6  | -0.000000003 | -0.000001049 | 0.000002552  |
| 6  | 0.000000006  | 0.00000023   | 0.000000381  |
| 6  | -0.000000956 | -0.000000878 | 0.000003447  |
| 1  | 0.000000228  | -0.000001102 | 0.000001836  |
| 1  | -0.000001144 | -0.000001525 | 0.000001501  |
| 7  | 0.000001657  | -0.000000699 | 0.000006416  |
| 8  | -0.000000254 | 0.000000385  | -0.000011694 |
| 1  | -0.000000741 | -0.000001358 | 0.000001732  |
| 1  | 0.000001654  | 0.00000001   | 0.000000951  |
| 17 | -0.000001623 | -0.000000481 | 0.000000998  |

Zero-point correction=

1.158573 (Hartree/Particle)

Thermal correction to Energy=

1.232829

Thermal correction to Enthalpy=

1.233774

Thermal correction to Gibbs Free Energy=

1.041479

Sum of electronic and zero-point Energies=

-4178.435221

Sum of electronic and thermal Energies=

-4178.360964

Sum of electronic and thermal Enthalpies=

-4178.360020

Sum of electronic and thermal Free Energies=

-4178.552314

G-TS1b

|    |              |              |              |
|----|--------------|--------------|--------------|
| 6  | 0.00000104   | -0.00000877  | -0.000001505 |
| 6  | -0.000001345 | -0.000001021 | 0.00000159   |
| 7  | 0.000000218  | 0.00000029   | 0.000000285  |
| 7  | 0.000000521  | 0.000000803  | 0.000000881  |
| 16 | 0.000001372  | -0.000001028 | -0.000001944 |
| 8  | 0.000001406  | -0.000000036 | -0.000001616 |
| 8  | 0.000000653  | -0.000001385 | -0.000001198 |
| 6  | 0.00000111   | -0.000001227 | -0.000002173 |
| 6  | 0.000001885  | -0.000000683 | -0.000002163 |
| 6  | 0.000001621  | -0.000001515 | -0.00000261  |
| 6  | 0.000000988  | -0.000001004 | -0.0000032   |
| 6  | 0.000001932  | -0.000002412 | -0.000001919 |
| 6  | 0.000001018  | -0.000002203 | -0.00000186  |
| 1  | 0.00000157   | -0.000000434 | -0.000002602 |
| 1  | 0.000002116  | -0.000001277 | -0.000003314 |
| 1  | 0.00000165   | -0.000003188 | -0.000002024 |
| 1  | 0.000001071  | -0.000002314 | -0.000001307 |
| 6  | 0.00000383   | -0.000004625 | -0.000002552 |
| 1  | 0.000001372  | -0.000003547 | -0.000002859 |
| 1  | 0.000002151  | -0.000002308 | -0.000003415 |
| 1  | 0.00000305   | -0.000002491 | -0.000003241 |
| 16 | -0.000000845 | 0.000000617  | 0.000001158  |
| 8  | -0.000000668 | 0.000001258  | 0.000001675  |
| 8  | -0.000000788 | 0.000000955  | 0.000000349  |
| 6  | -0.000000891 | 0.000000904  | 0.000001463  |
| 6  | -0.00000146  | 0.000001252  | 0.000002467  |
| 6  | -0.000001278 | 0.000000932  | 0.000001163  |
| 6  | -0.000001897 | 0.000000996  | 0.000002557  |
| 1  | -0.000001521 | 0.000001096  | 0.000002635  |
| 6  | -0.000001118 | 0.000001075  | 0.000001973  |
| 1  | -0.000000516 | 0.000000881  | 0.000000814  |
| 6  | -0.000002026 | 0.00000092   | 0.000002803  |
| 1  | -0.000002168 | 0.000001396  | 0.000003242  |
| 1  | -0.000001054 | 0.000001146  | 0.000001544  |
| 6  | -0.000001792 | 0.000001825  | 0.000002456  |
| 1  | -0.000001164 | 0.000001043  | 0.000002784  |
| 1  | -0.000002159 | 0.000002457  | 0.000002403  |
| 1  | -0.000002449 | 0.000001432  | 0.00000298   |
| 6  | -0.000000801 | -0.000000952 | 0.000001802  |
| 1  | -0.000001261 | 0.000000173  | 0.000001558  |
| 6  | -0.000001358 | -0.000000905 | 0.000002185  |
| 1  | -0.000001267 | -0.000001087 | 0.000002092  |
| 1  | -0.000001715 | 0.000000042  | 0.000002075  |
| 1  | -0.000001374 | -0.000001051 | 0.000002611  |

|    |              |              |              |
|----|--------------|--------------|--------------|
| 6  | -0.000000712 | -0.000001454 | 0.000001413  |
| 1  | 0.000000551  | -0.000001918 | 0.00000037   |
| 1  | -0.000000483 | -0.000001601 | 0.000001293  |
| 1  | -0.000000596 | -0.000001832 | 0.000001566  |
| 6  | 0.000000437  | -0.000000202 | -0.000000844 |
| 6  | 0.000000738  | 0.000000849  | -0.000001174 |
| 1  | 0.000001131  | -0.000000202 | -0.000001163 |
| 1  | 0.000000405  | -0.000000128 | -0.00000118  |
| 6  | 0.000000488  | 0.000001554  | -0.000001246 |
| 1  | 0.000000451  | 0.000001037  | -0.000001466 |
| 1  | 0.000000389  | 0.000000973  | -0.000000498 |
| 6  | 0.000000642  | 0.000002117  | -0.000001405 |
| 1  | 0.000000419  | 0.000001129  | -0.000000911 |
| 1  | 0.000000888  | 0.000001068  | -0.000001724 |
| 1  | 0.000000592  | 0.000002462  | -0.000001524 |
| 1  | 0.000000725  | 0.00000232   | -0.000001803 |
| 1  | 0.000000226  | 0.000002386  | -0.000000932 |
| 79 | -0.000000494 | -0.000000385 | 0.000000182  |
| 6  | 0.000000581  | 0.000000483  | -0.00000099  |
| 6  | -0.000000065 | 0.000000259  | 0.000000046  |
| 6  | 0.000000159  | 0.000001033  | -0.000000523 |
| 1  | 0.000000216  | 0.000001268  | -0.000000653 |
| 1  | -0.000000223 | 0.000000349  | 0.000000244  |
| 7  | -0.000000175 | 0.000000035  | 0.000000068  |
| 7  | -0.000000299 | 0.000001259  | -0.000000552 |
| 6  | -0.000000715 | -0.00000095  | 0.000000938  |
| 6  | -0.000000358 | -0.000001532 | 0.000000402  |
| 6  | -0.000000605 | -0.000000328 | 0.000001157  |
| 6  | -0.000000151 | -0.000002004 | 0.00000102   |
| 6  | -0.000001068 | -0.00000107  | 0.000001817  |
| 6  | -0.000000733 | -0.000001841 | 0.000001916  |
| 1  | -0.000000198 | -0.000002588 | 0.000000983  |
| 1  | -0.000001318 | -0.000000794 | 0.000002434  |
| 1  | -0.000000921 | -0.000002263 | 0.000002077  |
| 6  | 0.000000353  | 0.000001394  | -0.000000855 |
| 6  | 0.000000312  | 0.000001991  | -0.000001063 |
| 6  | 0.000000812  | 0.000001575  | -0.000001509 |
| 6  | 0.000000659  | 0.000002506  | -0.000001284 |
| 6  | 0.000001142  | 0.000001671  | -0.000002304 |
| 6  | 0.00000095   | 0.000002511  | -0.000002014 |
| 1  | 0.000000244  | 0.00000314   | -0.000001028 |
| 1  | 0.000001397  | 0.000001782  | -0.000002711 |
| 1  | 0.000001007  | 0.000002901  | -0.00000232  |
| 6  | -0.000000254 | 0.000002256  | 0.000000013  |

|   |              |              |              |
|---|--------------|--------------|--------------|
| 6 | -0.000000426 | 0.000002913  | -0.000000041 |
| 6 | -0.000000061 | 0.000002862  | 0.000000022  |
| 1 | -0.00000002  | 0.000001865  | 0.000000254  |
| 1 | -0.000000377 | 0.000002657  | -0.000000145 |
| 1 | -0.000000077 | 0.000003025  | 0.000000515  |
| 1 | -0.000000259 | 0.000003576  | -0.000000251 |
| 1 | -0.000000488 | 0.000002345  | 0.000000019  |
| 1 | -0.000000418 | 0.000002973  | -0.000000058 |
| 1 | -0.000000652 | 0.00000264   | 0.000000595  |
| 6 | 0.00000121   | 0.000000647  | -0.000001997 |
| 6 | 0.000001571  | 0.000000466  | -0.000002473 |
| 6 | 0.000001243  | 0.000000805  | -0.000002159 |
| 1 | 0.000001009  | -0.000000111 | -0.000001603 |
| 1 | 0.000001214  | 0.000000003  | -0.00000243  |
| 1 | 0.000001609  | -0.000000386 | -0.000002599 |
| 1 | 0.000001632  | 0.000000054  | -0.000003048 |
| 1 | 0.000000992  | 0.000001045  | -0.000001916 |
| 1 | 0.000001449  | 0.000001216  | -0.000002586 |
| 1 | 0.000001441  | 0.000000412  | -0.000002374 |
| 6 | -0.000001134 | 0.000000429  | 0.000001632  |
| 6 | -0.000001308 | 0.000000069  | 0.000002045  |
| 6 | -0.000001149 | 0.000000527  | 0.000001767  |
| 1 | -0.000000943 | 0.000000832  | 0.000001123  |
| 1 | -0.000001016 | 0.000000514  | 0.000001925  |
| 1 | -0.000001497 | 0.000001285  | 0.000002256  |
| 1 | -0.000001653 | 0.000000248  | 0.000002616  |
| 1 | -0.000000886 | 0.000000371  | 0.000001531  |
| 1 | -0.000001489 | 0.000000093  | 0.000002332  |
| 1 | -0.000001343 | 0.000001098  | 0.000001972  |
| 6 | 0.000000422  | -0.000001335 | -0.000000084 |
| 6 | 0.000000371  | -0.000001753 | -0.000000267 |
| 6 | 0.000000354  | -0.000002019 | -0.000000044 |
| 1 | 0.000000607  | -0.000000069 | -0.000000414 |
| 1 | 0.000000391  | -0.000001318 | -0.000000223 |
| 1 | 0.000000776  | -0.000001866 | -0.000000871 |
| 1 | 0.000000376  | -0.000002313 | -0.000000074 |
| 1 | 0.000000666  | -0.000002238 | -0.000000097 |
| 1 | 0.000000407  | -0.000002609 | -0.000000214 |
| 1 | 0.000000845  | -0.000002146 | -0.000000927 |
| 6 | -0.000000746 | -0.000001068 | 0.000001404  |
| 6 | -0.000001051 | -0.000001576 | 0.000001717  |
| 6 | -0.000000785 | -0.000002337 | 0.000001684  |
| 6 | -0.000000268 | -0.000002565 | 0.000001056  |
| 6 | 0.000000198  | -0.000001912 | 0.000000491  |

|                                              |              |              |                             |
|----------------------------------------------|--------------|--------------|-----------------------------|
| 1                                            | -0.00000087  | -0.000002841 | 0.000002067                 |
| 1                                            | -0.000000822 | -0.00000043  | 0.000001506                 |
| 7                                            | 0.000000101  | -0.00000094  | 0.000000773                 |
| 8                                            | -0.000000274 | -0.00000188  | 0.000000389                 |
| 1                                            | -0.000000097 | -0.00000318  | 0.00000094                  |
| 1                                            | -0.000001219 | -0.000001435 | 0.000002322                 |
| 17                                           | 0.000000597  | -0.000002286 | -0.00000034                 |
| Zero-point correction=                       |              |              | 1.157252 (Hartree/Particle) |
| Thermal correction to Energy=                |              |              | 1.231685                    |
| Thermal correction to Enthalpy=              |              |              | 1.232629                    |
| Thermal correction to Gibbs Free Energy=     |              |              | 1.036797                    |
| Sum of electronic and zero-point Energies=   |              |              | -4178.434457                |
| Sum of electronic and thermal Energies=      |              |              | -4178.360024                |
| Sum of electronic and thermal Enthalpies=    |              |              | -4178.359080                |
| Sum of electronic and thermal Free Energies= |              |              | -4178.554912                |

#### G-1b

|    |              |              |              |
|----|--------------|--------------|--------------|
| 6  | -0.000000952 | 0.000012905  | -0.000002118 |
| 6  | 0.000001189  | -0.000016857 | 0.000004591  |
| 7  | -0.000002934 | -0.000004763 | -0.000001855 |
| 7  | 0.000000745  | 0.000012451  | 0.000010835  |
| 16 | 0.000004251  | 0.000000837  | 0.000000614  |
| 8  | -0.000002948 | -0.000000189 | 0.000000166  |
| 8  | -0.00000044  | 0.000000749  | -0.00000173  |
| 6  | 0.000000663  | -0.000000327 | -0.000000916 |
| 6  | -0.00000124  | -0.000001095 | -0.000001258 |
| 6  | -0.000000449 | -0.000000296 | -0.000001731 |
| 6  | -0.000000719 | -0.000000266 | -0.00000045  |
| 6  | -0.000000994 | 0.000001271  | -0.000002265 |
| 6  | 0.000000523  | 0.000000514  | -0.000000106 |
| 1  | -0.000000243 | 0.00000065   | -0.000001559 |
| 1  | -0.000000786 | -0.000000432 | -0.000001723 |
| 1  | 0.000000145  | 0.00000049   | -0.000001279 |
| 1  | 0.000000083  | 0.000000396  | -0.000001257 |
| 6  | -0.000000753 | -0.000000425 | -0.00000182  |
| 1  | -0.00000055  | 0.000000346  | -0.000002069 |
| 1  | -0.000000478 | -0.000000214 | -0.000001773 |
| 1  | -0.000000216 | 0.000000305  | -0.000001639 |
| 16 | 0.000001656  | -0.000006277 | -0.000006751 |
| 8  | -0.000000394 | -0.000000985 | 0.000001421  |
| 8  | -0.000000593 | -0.000000373 | 0.0000006    |
| 6  | -0.00000071  | 0.000000812  | -0.000000495 |
| 6  | 0.000000594  | -0.000001106 | 0.000002206  |
| 6  | 0.000000691  | -0.000000994 | 0.000000951  |

|    |              |              |              |
|----|--------------|--------------|--------------|
| 6  | 0.000001373  | -0.000000975 | 0.000001726  |
| 1  | 0.000000142  | -0.000000028 | 0.000001364  |
| 6  | -0.000000335 | -0.000001282 | 0.00000167   |
| 1  | -0.000000404 | -0.000000902 | 0.000001004  |
| 6  | -0.000000471 | 0.000000285  | 0.000000899  |
| 1  | 0.000000242  | -0.000000072 | 0.000001913  |
| 1  | 0.000000003  | -0.000001198 | 0.000001262  |
| 6  | -0.000000252 | -0.000000938 | 0.000001809  |
| 1  | 0.000000267  | -0.000001113 | 0.000001579  |
| 1  | 0.000000261  | -0.000001696 | 0.000002145  |
| 1  | 0.000000129  | -0.000000855 | 0.000002398  |
| 6  | -0.000001446 | 0.000000009  | -0.00000299  |
| 1  | 0.000000434  | 0.000000738  | 0.00000079   |
| 6  | 0.000000885  | 0.000000168  | 0.000000896  |
| 1  | 0.000000432  | 0.000000165  | 0.000001398  |
| 1  | 0.000000057  | 0.000000109  | 0.000000834  |
| 1  | 0.000000431  | 0.000000032  | 0.000000889  |
| 6  | 0.000000855  | 0.000000619  | 0.00000077   |
| 1  | 0.000000127  | 0.000001225  | -0.000000551 |
| 1  | 0.000000067  | 0.000001195  | 0.000000064  |
| 1  | 0.000000233  | 0.000000537  | 0.00000008   |
| 6  | 0.000001222  | -0.000002036 | 0.000000942  |
| 6  | -0.000000198 | -0.000000526 | -0.000001328 |
| 1  | -0.000000352 | -0.000000313 | -0.000000769 |
| 1  | -0.000000999 | -0.000000881 | 0.000000127  |
| 6  | -0.000000244 | -0.000001083 | 0.000000402  |
| 1  | -0.000000052 | -0.000000155 | -0.000000167 |
| 1  | -0.000000506 | -0.000000351 | -0.000000283 |
| 6  | -0.000000634 | -0.000001195 | -0.000000486 |
| 1  | -0.000000599 | -0.000001048 | -0.000000217 |
| 1  | -0.000000073 | -0.00000111  | -0.000000781 |
| 1  | -0.000000728 | -0.000001621 | -0.000000239 |
| 1  | -0.000000394 | -0.000001539 | -0.000000297 |
| 1  | -0.000000508 | -0.000001419 | -0.000000022 |
| 79 | -0.000000891 | -0.000003086 | -0.000002414 |
| 6  | 0.000001693  | 0.000003052  | 0.000001269  |
| 6  | 0.000000008  | -0.000001022 | -0.000000416 |
| 6  | -0.000000658 | 0.000000006  | 0.000001152  |
| 1  | 0.000000038  | 0.000000156  | -0.000000341 |
| 1  | 0.000000434  | 0.000000744  | -0.000000241 |
| 7  | -0.000002556 | 0.000001615  | -0.000001712 |
| 7  | 0.000003429  | -0.000002427 | -0.000001893 |
| 6  | 0.00000106   | -0.000002911 | 0.000000055  |
| 6  | -0.000000727 | 0.000003512  | 0.000003897  |

|   |              |              |              |
|---|--------------|--------------|--------------|
| 6 | 0.000003004  | 0.0000045    | -0.00000204  |
| 6 | 0.000001107  | 0.000003069  | -0.000001715 |
| 6 | 0.000000258  | 0.000001442  | 0.000002645  |
| 6 | -0.00000009  | -0.000001576 | -0.000000468 |
| 1 | 0.000000306  | 0.0000016    | -0.000000052 |
| 1 | 0.000000828  | 0.000000954  | 0.000000744  |
| 1 | 0.000000903  | 0.000001623  | 0.000000697  |
| 6 | -0.000003593 | -0.000001486 | 0.000000121  |
| 6 | 0.000000458  | -0.000000122 | -0.00000023  |
| 6 | 0.000000012  | 0.000002173  | -0.00000109  |
| 6 | -0.000000662 | -0.000000431 | -0.000000229 |
| 6 | -0.000000128 | -0.000000738 | 0.00000042   |
| 6 | -0.000001316 | -0.000002268 | -0.000000959 |
| 1 | -0.000000618 | -0.000000962 | -0.000000607 |
| 1 | -0.000000797 | -0.000000453 | -0.00000123  |
| 1 | -0.000000556 | -0.000000901 | -0.000000766 |
| 6 | -0.000000875 | -0.000000296 | 0.000000731  |
| 6 | -0.000000144 | -0.000000631 | 0.000000289  |
| 6 | -0.000000103 | 0.00000018   | 0.000000128  |
| 1 | 0.00000047   | 0.000000367  | -0.000000035 |
| 1 | 0.000000182  | -0.0000005   | 0.000000348  |
| 1 | -0.000000042 | -0.00000045  | 0.000000671  |
| 1 | -0.000000368 | -0.000000555 | 0.000000385  |
| 1 | 0.000000463  | -0.000000929 | 0.000000993  |
| 1 | 0.000000106  | -0.000001027 | 0.000000426  |
| 1 | -0.000000194 | -0.000000769 | 0.000000724  |
| 6 | -0.000000216 | -0.000000347 | -0.000000569 |
| 6 | -0.000000065 | 0.000000024  | -0.000001211 |
| 6 | 0.000000797  | -0.000000526 | -0.000000932 |
| 1 | -0.000000278 | 0.000000132  | -0.000001067 |
| 1 | -0.000000148 | 0.000000476  | -0.000001469 |
| 1 | -0.000000132 | 0.000000306  | -0.000001372 |
| 1 | -0.000000442 | 0.000000004  | -0.000001314 |
| 1 | -0.000000466 | 0.000000051  | -0.000000847 |
| 1 | -0.000001035 | 0.000000198  | -0.000001339 |
| 1 | -0.000000286 | 0.000000325  | -0.000001412 |
| 6 | 0.000000477  | -0.000000264 | 0.000001708  |
| 6 | 0.000001011  | 0.000001347  | 0.000001233  |
| 6 | 0.000000365  | 0.000000325  | 0.00000053   |
| 1 | 0.000001344  | 0.000000101  | 0.000000371  |
| 1 | -0.000000144 | -0.000000042 | 0.000000584  |
| 1 | 0.000000212  | 0.000000126  | 0.000000901  |
| 1 | 0.000000404  | 0.000000807  | 0.000001357  |
| 1 | 0.00000018   | 0.000001117  | 0.000000473  |



|    |              |              |              |
|----|--------------|--------------|--------------|
| 1  | 0.000001007  | 0.000000864  | 0.000000795  |
| 1  | 0.000000196  | 0.000000613  | 0.000000958  |
| 6  | -0.000000899 | -0.00000052  | -0.000002002 |
| 6  | 0.000000708  | 0.000001195  | -0.000000816 |
| 6  | 0.000002312  | 0.000001147  | -0.000000453 |
| 1  | -0.000000027 | 0.000000756  | 0.000000354  |
| 1  | 0.000000545  | 0.000001658  | -0.000000297 |
| 1  | 0.000000236  | 0.000001318  | -0.000000955 |
| 1  | 0.000000026  | 0.000001607  | -0.000000293 |
| 1  | -0.000000398 | 0.000001253  | 0.000000034  |
| 1  | 0.000000206  | 0.000000922  | -0.000000191 |
| 1  | -0.000000255 | 0.000000651  | -0.000001216 |
| 6  | 0.000000562  | -0.000000482 | 0.000000047  |
| 6  | -0.000000251 | -0.000000051 | 0.000001489  |
| 6  | 0.000000232  | 0.000000066  | 0.000000658  |
| 6  | 0.000000059  | 0.000000368  | -0.000000298 |
| 6  | -0.000000091 | -0.000000004 | 0.000000329  |
| 1  | 0.000000388  | 0.000000044  | 0.000000954  |
| 1  | -0.000000075 | 0.000000426  | 0.000001274  |
| 7  | -0.000000772 | -0.000000393 | 0.000001202  |
| 8  | -0.000000687 | 0.0000003073 | -0.000002914 |
| 1  | 0.000000001  | 0.000000465  | 0.000000196  |
| 1  | 0.000000196  | -0.000000059 | 0.000001014  |
| 17 | -0.000000042 | -0.000000246 | -0.000000599 |

Zero-point correction=

1.158934 (Hartree/Particle)

Thermal correction to Energy=

1.233149

Thermal correction to Enthalpy=

1.234094

Thermal correction to Gibbs Free Energy=

1.039370

Sum of electronic and zero-point Energies=

-4178.437421

Sum of electronic and thermal Energies=

-4178.363206

Sum of electronic and thermal Enthalpies=

-4178.362262

Sum of electronic and thermal Free Energies=

-4178.556985

G-TS2a

|    |              |              |              |
|----|--------------|--------------|--------------|
| 6  | 0.000000339  | -0.000000305 | -0.000000277 |
| 6  | 0.000000335  | -0.000000253 | 0.000000073  |
| 7  | 0.000000583  | -0.000000024 | 0.000000122  |
| 7  | -0.000000128 | 0.000000334  | 0.000000297  |
| 16 | 0.000000328  | 0.000000396  | 0.000000901  |
| 8  | 0.000000015  | 0.000000515  | 0.000001001  |
| 8  | 0.000000506  | 0.000000515  | 0.000001572  |
| 6  | 0.000000253  | 0.000000042  | 0.000001559  |
| 6  | -0.000000171 | 0.000000563  | 0.000001133  |
| 6  | -0.000000007 | 0.000000658  | 0.000001317  |

|    |              |              |             |
|----|--------------|--------------|-------------|
| 6  | 0.000000144  | 0.000000493  | 0.000002186 |
| 6  | 0.000000435  | 0.000000453  | 0.000001891 |
| 6  | 0.000000054  | 0.000000515  | 0.000001657 |
| 1  | -0.000000258 | 0.000000697  | 0.000001117 |
| 1  | -0.000000164 | 0.000000757  | 0.000001403 |
| 1  | 0.000000889  | 0.000000386  | 0.00000216  |
| 1  | 0.000000814  | 0.000000305  | 0.000001791 |
| 6  | 0.000000575  | 0.000000471  | 0.000001953 |
| 1  | 0.000000202  | 0.000001047  | 0.00000201  |
| 1  | -0.000000064 | 0.000000757  | 0.000001711 |
| 1  | 0.000000647  | 0.00000071   | 0.000001843 |
| 16 | 0.000000331  | 0.000000041  | 0.000000335 |
| 8  | -0.000000177 | 0.000000191  | 0.000000119 |
| 8  | 0.000000435  | -0.000000088 | 0.000000305 |
| 6  | 0.000000182  | 0.000000609  | 0.000000091 |
| 6  | -0.000000924 | 0.000000744  | 0.000000788 |
| 6  | 0.000000268  | 0.000000298  | 0.000001228 |
| 6  | -0.000000077 | 0.000000417  | 0.000001609 |
| 1  | -0.000000119 | 0.000000516  | 0.000000989 |
| 6  | -0.000000636 | 0.000000722  | 0.000001069 |
| 1  | 0.000000242  | 0.000000214  | 0.000000837 |
| 6  | -0.000000021 | 0.000001256  | 0.000001543 |
| 1  | -0.000000342 | 0.000000931  | 0.000001532 |
| 1  | 0.000000027  | 0.000000058  | 0.000001384 |
| 6  | -0.000000008 | 0.000000846  | 0.000001818 |
| 1  | 0.000000196  | 0.000000916  | 0.000002437 |
| 1  | -0.000000423 | 0.000001365  | 0.000001723 |
| 1  | -0.000000509 | 0.000001252  | 0.000001985 |
| 6  | 0.000000957  | -0.000000071 | 0.00000008  |
| 1  | 0.000000071  | -0.000000025 | 0.000000864 |
| 6  | 0.000000801  | -0.000000092 | 0.000001062 |
| 1  | 0.000000826  | -0.000000078 | 0.000000892 |
| 1  | 0.000000621  | 0.000000138  | 0.000001217 |
| 1  | 0.000001103  | -0.000000209 | 0.000001173 |
| 6  | 0.000000944  | -0.000000509 | 0.000000293 |
| 1  | 0.000000876  | -0.000000541 | 0.000000205 |
| 1  | 0.000000882  | -0.000000445 | 0.000000255 |
| 1  | 0.000001232  | -0.000000579 | 0.000000523 |
| 6  | 0.000000925  | -0.000000122 | 0.000000884 |
| 6  | 0.00000103   | -0.000000455 | 0.000000562 |
| 1  | 0.000000073  | -0.000000111 | 0.000000846 |
| 1  | 0.000000946  | -0.000000078 | 0.000001135 |
| 6  | 0.000001309  | -0.000000653 | 0.000000552 |
| 1  | 0.000000837  | -0.000000435 | 0.000000239 |

|    |              |              |              |
|----|--------------|--------------|--------------|
| 1  | 0.000000977  | -0.000000437 | 0.000000442  |
| 6  | 0.00000152   | -0.000000977 | 0.000000201  |
| 1  | 0.000001511  | -0.000000621 | 0.000000841  |
| 1  | 0.00000121   | -0.000000566 | 0.000000524  |
| 1  | 0.000001733  | -0.000001051 | 0.000000249  |
| 1  | 0.000001335  | -0.000000932 | -0.000000072 |
| 1  | 0.000001592  | -0.000001018 | 0.000000187  |
| 79 | -0.000000379 | -0.000000002 | -0.000000522 |
| 6  | -0.000000002 | -0.000000401 | -0.000000656 |
| 6  | -0.000000474 | -0.000000385 | -0.000001455 |
| 6  | -0.000000615 | -0.000000227 | -0.000001434 |
| 1  | -0.000000919 | -0.000000163 | -0.000001707 |
| 1  | -0.000000395 | -0.000000647 | -0.000001823 |
| 7  | -0.000000265 | -0.000000403 | -0.000001252 |
| 7  | -0.000000668 | 0.000000021  | -0.000001244 |
| 6  | 0.000000047  | -0.000000581 | -0.000001098 |
| 6  | 0.000000181  | -0.000000907 | -0.000001039 |
| 6  | 0.000000477  | -0.000000892 | -0.000001187 |
| 6  | 0.000000642  | -0.000000934 | -0.000001062 |
| 6  | 0.000000765  | -0.000001065 | -0.000000919 |
| 6  | 0.000000928  | -0.00000097  | -0.000000826 |
| 1  | 0.000000607  | -0.000000798 | -0.000000865 |
| 1  | 0.000001068  | -0.00000116  | -0.000000901 |
| 1  | 0.000001136  | -0.00000115  | -0.000000819 |
| 6  | -0.000000848 | 0.000000083  | -0.000000911 |
| 6  | -0.000000832 | 0.000000278  | -0.000001099 |
| 6  | -0.000001168 | 0.000000343  | -0.000000731 |
| 6  | -0.000001091 | 0.000000379  | -0.000000804 |
| 6  | -0.000001373 | 0.00000008   | -0.000000563 |
| 6  | -0.000001421 | 0.000000643  | -0.000000717 |
| 1  | -0.000001201 | 0.000000362  | -0.000000844 |
| 1  | -0.000001592 | 0.000000084  | -0.000000543 |
| 1  | -0.000001647 | 0.000000802  | -0.000000605 |
| 6  | -0.000000674 | -0.000000006 | -0.000001118 |
| 6  | -0.000000828 | -0.000000152 | -0.00000151  |
| 6  | -0.000000424 | -0.000000029 | -0.000000834 |
| 1  | -0.00000047  | -0.000000349 | -0.000001257 |
| 1  | -0.000001009 | -0.000000139 | -0.000001745 |
| 1  | -0.000000637 | -0.000000034 | -0.000001674 |
| 1  | -0.00000101  | -0.000000001 | -0.000001447 |
| 1  | -0.000000199 | -0.000000173 | -0.000000537 |
| 1  | -0.000000551 | 0.000000027  | -0.000000785 |
| 1  | -0.000000218 | -0.000000335 | -0.000001011 |
| 6  | -0.000001102 | 0.000000388  | -0.000000711 |

|    |              |              |              |
|----|--------------|--------------|--------------|
| 6  | -0.000001105 | 0.000000608  | -0.000000373 |
| 6  | -0.000001506 | 0.000000493  | -0.000001059 |
| 1  | -0.000000927 | 0.000000232  | -0.000000985 |
| 1  | -0.000000886 | 0.000000489  | -0.000000114 |
| 1  | -0.000001152 | 0.000000625  | -0.000000033 |
| 1  | -0.000001349 | 0.000000804  | -0.000000296 |
| 1  | -0.00000152  | 0.000000437  | -0.000001364 |
| 1  | -0.000001744 | 0.000000703  | -0.000001002 |
| 1  | -0.000001535 | 0.000000505  | -0.000001098 |
| 6  | 0.000000481  | -0.000000834 | -0.000001225 |
| 6  | 0.000000611  | -0.000000782 | -0.000000875 |
| 6  | 0.000000585  | -0.000001125 | -0.000001528 |
| 1  | 0.000000252  | -0.000000702 | -0.000001057 |
| 1  | 0.000000083  | -0.000000638 | -0.000000246 |
| 1  | 0.000000692  | -0.000000779 | -0.000000738 |
| 1  | 0.000000918  | -0.000000902 | -0.000000702 |
| 1  | 0.000000421  | -0.000001098 | -0.000001701 |
| 1  | 0.000000889  | -0.000001329 | -0.00000145  |
| 1  | 0.000000549  | -0.000001086 | -0.000001553 |
| 6  | -0.000000151 | -0.000000487 | -0.000001076 |
| 6  | -0.000000188 | -0.000000059 | -0.00000149  |
| 6  | -0.000000072 | -0.000000313 | -0.000000666 |
| 1  | -0.000000331 | -0.000000207 | -0.000001002 |
| 1  | -0.000000229 | -0.000000572 | -0.00000169  |
| 1  | -0.000000418 | -0.000000438 | -0.000001454 |
| 1  | 0.000000036  | -0.000000719 | -0.000001485 |
| 1  | 0.000000092  | -0.000000307 | -0.000000503 |
| 1  | 0.000000146  | -0.000000459 | -0.000000688 |
| 1  | -0.000000025 | -0.000000012 | -0.000000717 |
| 6  | -0.000000479 | 0.000000451  | 0.000000321  |
| 6  | -0.000000744 | 0.000000069  | 0.000000227  |
| 6  | -0.000000847 | 0.000000743  | 0.000000024  |
| 6  | -0.000000524 | 0.000000473  | 0.000000496  |
| 6  | -0.000000298 | 0.000000187  | 0.000000252  |
| 1  | -0.000001103 | 0.000000845  | 0.000000331  |
| 1  | -0.00000006  | 0.000000523  | -0.000000007 |
| 7  | -0.000000102 | 0.000000328  | 0.000000294  |
| 8  | 0.000000251  | 0.000000015  | 0.000000283  |
| 1  | -0.000000546 | 0.000000048  | 0.000000287  |
| 1  | -0.000001015 | 0.000000864  | 0.000000302  |
| 17 | 0.000000224  | 0.000000047  | 0.000000101  |

Zero-point correction=

1.156091 (Hartree/Particle)

Thermal correction to Energy=

1.231161

Thermal correction to Enthalpy=

1.232106

|                                              |              |
|----------------------------------------------|--------------|
| Thermal correction to Gibbs Free Energy=     | 1.033238     |
| Sum of electronic and zero-point Energies=   | -4178.426811 |
| Sum of electronic and thermal Energies=      | -4178.351741 |
| Sum of electronic and thermal Enthalpies=    | -4178.350797 |
| Sum of electronic and thermal Free Energies= | -4178.549664 |

G-2a

|    |              |              |              |
|----|--------------|--------------|--------------|
| 6  | 0.000005067  | -0.000000748 | -0.000001351 |
| 6  | -0.000002146 | 0.000002453  | -0.000000188 |
| 7  | -0.000003423 | 0.000000297  | 0.000000899  |
| 7  | -0.000001031 | -0.000001981 | 0.000000963  |
| 16 | 0.000002358  | -0.000001767 | -0.000000089 |
| 8  | -0.000000772 | -0.00000155  | 0.000000073  |
| 8  | -0.00000089  | -0.000000329 | -0.000001365 |
| 6  | 0.000000003  | -0.000000598 | 0.000001304  |
| 6  | 0.000000124  | -0.000001758 | -0.000000171 |
| 6  | 0.000000391  | -0.000001725 | 0.000000596  |
| 6  | -0.00000001  | -0.000000799 | 0.000001101  |
| 6  | -0.000000142 | -0.000001525 | -0.000000436 |
| 6  | 0.00000004   | -0.000001004 | -0.000001092 |
| 1  | 0.000000498  | -0.0000016   | 0.000000754  |
| 1  | 0.000000748  | -0.000001658 | 0.000001388  |
| 1  | 0.000000073  | -0.000001075 | -0.000000252 |
| 1  | -0.000000235 | -0.000000764 | -0.000000514 |
| 6  | 0.000000083  | -0.000001816 | 0.000001279  |
| 1  | 0.000000339  | -0.000001886 | 0.000000397  |
| 1  | 0.000000589  | -0.000001294 | 0.000000924  |
| 1  | 0.000000164  | -0.000001337 | 0.000000328  |
| 16 | 0.000002155  | 0.000001232  | -0.000002119 |
| 8  | -0.000001489 | -0.000002292 | -0.000000047 |
| 8  | -0.000000396 | -0.000000466 | -0.000000985 |
| 6  | -0.00000157  | -0.000000548 | -0.000001718 |
| 6  | -0.000001239 | -0.000001325 | -0.000001997 |
| 6  | -0.000000535 | -0.000000899 | -0.000002637 |
| 6  | -0.000000871 | -0.000001449 | -0.000002262 |
| 1  | -0.000000749 | -0.000001671 | -0.000001277 |
| 6  | -0.000002017 | -0.000000991 | -0.000003048 |
| 1  | -0.000001079 | -0.000000387 | -0.000002164 |
| 6  | 0.000000026  | -0.000000538 | -0.000002982 |
| 1  | -0.000000892 | -0.000001745 | -0.000002611 |
| 1  | -0.000001221 | -0.000000849 | -0.000003585 |
| 6  | -0.000000871 | -0.000001539 | -0.000004825 |
| 1  | -0.000001864 | -0.000001228 | -0.000003326 |
| 1  | -0.000001964 | -0.000001718 | -0.00000347  |

|    |              |              |              |
|----|--------------|--------------|--------------|
| 1  | -0.000001658 | -0.000002445 | -0.000003097 |
| 6  | -0.000000911 | -0.000000041 | -0.000002061 |
| 1  | -0.000000972 | 0.000001055  | -0.000000724 |
| 6  | -0.000000127 | 0.000000061  | -0.000001506 |
| 1  | -0.000001173 | 0.00000002   | -0.000002001 |
| 1  | -0.000000587 | -0.000000127 | -0.000001721 |
| 1  | -0.000000711 | 0.000000745  | -0.000001988 |
| 6  | -0.00000007  | 0.000001811  | -0.000000816 |
| 1  | -0.000000282 | 0.000000852  | -0.000000771 |
| 1  | -0.000000799 | 0.000000058  | -0.000001532 |
| 1  | -0.000000316 | 0.000001432  | -0.000001401 |
| 6  | 0.000000177  | -0.000001062 | -0.000001779 |
| 6  | -0.000000312 | 0.000000812  | -0.000000103 |
| 1  | -0.000000216 | 0.000000715  | -0.000000441 |
| 1  | -0.000000201 | 0.000000889  | -0.000000054 |
| 6  | 0.000000016  | 0.000001633  | 0.000000328  |
| 1  | 0.000000641  | 0.000000708  | 0.000000895  |
| 1  | 0.000000175  | 0.000000981  | 0.000000302  |
| 6  | 0.000000021  | 0.000001928  | 0.000000717  |
| 1  | -0.00000002  | 0.000001629  | -0.000000387 |
| 1  | 0.000000004  | 0.000001214  | 0.000000233  |
| 1  | 0.00000001   | 0.000002358  | 0.000000581  |
| 1  | 0.000000403  | 0.00000018   | 0.000001143  |
| 1  | 0.000000152  | 0.000002128  | 0.000000633  |
| 79 | -0.000000582 | -0.000000278 | -0.000000063 |
| 6  | 0.000001481  | -0.000000247 | -0.000002524 |
| 6  | 0.000000435  | -0.000000155 | 0.000001815  |
| 6  | 0.000001203  | 0.000002026  | -0.000000283 |
| 1  | 0.000000054  | 0.000000351  | 0.000001141  |
| 1  | 0.000000198  | 0.000001366  | 0.000000929  |
| 7  | -0.000001806 | 0.000002951  | 0.000000285  |
| 7  | -0.000000418 | -0.000000645 | 0.000003114  |
| 6  | 0.000000912  | 0.000001751  | -0.000000671 |
| 6  | -0.000000541 | 0.000001209  | -0.000000819 |
| 6  | 0.000000328  | 0.000001976  | 0.000001044  |
| 6  | -0.000000503 | 0.000001965  | -0.000000061 |
| 6  | -0.000000024 | 0.000002313  | -0.000000122 |
| 6  | -0.000000563 | 0.00000288   | -0.000000859 |
| 1  | -0.000000528 | 0.000002243  | -0.000001437 |
| 1  | -0.000000362 | 0.000002826  | 0.000000045  |
| 1  | -0.000000498 | 0.00000291   | -0.000001    |
| 6  | -0.000000012 | 0.000000608  | 0.000000914  |
| 6  | 0.000000747  | -0.000001411 | 0.000000904  |
| 6  | 0.000001474  | -0.000001169 | 0.000001245  |

|   |              |              |              |
|---|--------------|--------------|--------------|
| 6 | 0.000001026  | -0.000001401 | 0.00000204   |
| 6 | -0.000000078 | -0.000001648 | 0.000001178  |
| 6 | 0.000000653  | -0.000001551 | 0.000001581  |
| 1 | 0.000001175  | -0.000001035 | 0.000002341  |
| 1 | 0.000000329  | -0.000001928 | 0.000000739  |
| 1 | 0.000000788  | -0.000002017 | 0.000001757  |
| 6 | 0.000002733  | -0.000000715 | 0.000001207  |
| 6 | 0.000000123  | 0.000000726  | 0.000002958  |
| 6 | -0.000000331 | 0.000000529  | 0.000003037  |
| 1 | 0.00000126   | -0.000000204 | 0.000001645  |
| 1 | 0.000001081  | 0.000000187  | 0.000002575  |
| 1 | 0.000000898  | 0.000000568  | 0.000002912  |
| 1 | 0.000001461  | -0.000000778 | 0.000003329  |
| 1 | 0.000000861  | 0.000000366  | 0.000001893  |
| 1 | 0.00000149   | -0.000000313 | 0.000001517  |
| 1 | 0.000000885  | 0.00000058   | 0.000002385  |
| 6 | -0.000000245 | -0.000001121 | 0.000000026  |
| 6 | -0.00000015  | -0.000001292 | 0.000000231  |
| 6 | 0.000000059  | -0.000001365 | 0.000000166  |
| 1 | 0.000000438  | -0.00000049  | 0.000000223  |
| 1 | -0.000000282 | -0.000001468 | -0.000000697 |
| 1 | -0.000000128 | -0.000001344 | -0.000000868 |
| 1 | -0.000000117 | -0.000002221 | -0.000000341 |
| 1 | 0.000000256  | -0.000000929 | 0.000000065  |
| 1 | 0.000000447  | -0.000001558 | 0.000000031  |
| 1 | -0.000000114 | -0.000001076 | -0.000000167 |
| 6 | 0.000000394  | 0.000001539  | 0.000000949  |
| 6 | 0.000000075  | 0.000002038  | 0.000001036  |
| 6 | 0.000000194  | 0.000002774  | 0.000001198  |
| 1 | 0.000000341  | 0.00000159   | 0.00000125   |
| 1 | 0.000000422  | 0.000001532  | 0.000000721  |
| 1 | 0.000000534  | 0.000001916  | 0.000001414  |
| 1 | 0.000000233  | 0.000002459  | 0.000000081  |
| 1 | 0.000000426  | 0.000002637  | 0.000001239  |
| 1 | 0.000000321  | 0.000002965  | 0.000001061  |
| 1 | 0.000000592  | 0.000002604  | 0.000001731  |
| 6 | 0.000000732  | 0.000000982  | -0.000000664 |
| 6 | -0.000001055 | 0.000001553  | -0.000000831 |
| 6 | -0.000001386 | 0.000000864  | -0.000000924 |
| 1 | -0.000000151 | 0.000000656  | -0.000000056 |
| 1 | -0.000000305 | 0.000001441  | -0.000000423 |
| 1 | -0.000000528 | 0.000001135  | -0.000000984 |
| 1 | -0.000000397 | 0.000001855  | -0.000001226 |
| 1 | -0.000000645 | 0.000000491  | -0.00000183  |

|                                              |              |              |                             |
|----------------------------------------------|--------------|--------------|-----------------------------|
| 1                                            | -0.000000649 | 0.00000118   | -0.000001579                |
| 1                                            | -0.000000805 | 0.000000526  | -0.000001617                |
| 6                                            | -0.000000064 | -0.000001    | 0.000001034                 |
| 6                                            | 0.000000221  | -0.000001905 | 0.000000965                 |
| 6                                            | 0.000000717  | -0.000002347 | 0.000001163                 |
| 6                                            | 0.000000719  | -0.000001891 | 0.00000167                  |
| 6                                            | 0.000001194  | -0.000000586 | 0.000001543                 |
| 1                                            | 0.000000911  | -0.000002479 | 0.000001436                 |
| 1                                            | 0.000000555  | -0.000001415 | -0.000000402                |
| 7                                            | 0.000001324  | 0.000000542  | 0.000001098                 |
| 8                                            | -0.000002444 | -0.000000661 | 0.000000096                 |
| 1                                            | 0.000000089  | -0.000001669 | 0.000002252                 |
| 1                                            | 0.000000444  | -0.000002085 | 0.000000529                 |
| 17                                           | 0.000000694  | -0.000000738 | 0.000001783                 |
| Zero-point correction=                       |              |              | 1.158520 (Hartree/Particle) |
| Thermal correction to Energy=                |              |              | 1.233151                    |
| Thermal correction to Enthalpy=              |              |              | 1.234095                    |
| Thermal correction to Gibbs Free Energy=     |              |              | 1.035614                    |
| Sum of electronic and zero-point Energies=   |              |              | -4178.446560                |
| Sum of electronic and thermal Energies=      |              |              | -4178.371929                |
| Sum of electronic and thermal Enthalpies=    |              |              | -4178.370985                |
| Sum of electronic and thermal Free Energies= |              |              | -4178.569466                |

#### G-TS2b

|    |              |              |              |
|----|--------------|--------------|--------------|
| 6  | 0.000001716  | -0.000002818 | -0.000000682 |
| 6  | 0.000001943  | 0.000001997  | 0.000003324  |
| 7  | -0.000001078 | 0.000001545  | 0.000000272  |
| 7  | -0.000002425 | 0.00000003   | -0.000001197 |
| 16 | -0.000000056 | 0.000000782  | -0.000000795 |
| 8  | -0.000000285 | 0.000000327  | 0.000000276  |
| 8  | 0.000000084  | 0.000001361  | 0.000000478  |
| 6  | 0.000000802  | 0.000000385  | -0.000000583 |
| 6  | 0.000000416  | 0.000000626  | 0.000000068  |
| 6  | 0.000000504  | 0.000000826  | 0.000000324  |
| 6  | 0.000000769  | 0.000000246  | -0.000000536 |
| 6  | 0.000000598  | 0.000000635  | 0.000000149  |
| 6  | 0.000000249  | 0.000000848  | 0.000000916  |
| 1  | 0.000000096  | 0.000000507  | -0.00000014  |
| 1  | 0.000000409  | 0.000000078  | -0.000000247 |
| 1  | 0.000000736  | 0.000000406  | -0.00000004  |
| 1  | 0.00000006   | 0.000000208  | -0.000000319 |
| 6  | 0.000000076  | 0.000001142  | 0.000000396  |
| 1  | 0.000000761  | 0.000000908  | 0.000000125  |
| 1  | 0.000000504  | 0.000000905  | 0.000000198  |



|    |              |              |              |
|----|--------------|--------------|--------------|
| 1  | 0.000000852  | 0.000000952  | 0.000000246  |
| 16 | -0.000000523 | -0.000000486 | 0.000000135  |
| 8  | -0.000000863 | 0.000000003  | 0.000000109  |
| 8  | 0.000000067  | -0.000000108 | -0.000000157 |
| 6  | -0.000000538 | 0.000000115  | -0.000000285 |
| 6  | -0.000000036 | 0.000000246  | -0.000000063 |
| 6  | -0.000000675 | -0.000000161 | -0.000000544 |
| 6  | -0.000000833 | 0.000000026  | -0.000000126 |
| 1  | -0.000000343 | -0.000000041 | -0.000000022 |
| 6  | -0.000000805 | 0.000000092  | -0.000000271 |
| 1  | -0.000000699 | -0.000000034 | -0.000000122 |
| 6  | -0.000001209 | 0.000000033  | -0.000000029 |
| 1  | -0.000000897 | 0.000000538  | -0.000000094 |
| 1  | -0.000001066 | -0.000000012 | -0.000000057 |
| 6  | -0.000001114 | 0.000000234  | -0.000000272 |
| 1  | -0.000001174 | 0.000000023  | -0.00000003  |
| 1  | -0.000001017 | 0.000000214  | -0.000000257 |
| 1  | -0.00000105  | 0.000000377  | -0.000000385 |
| 6  | 0.000001817  | 0.000001267  | -0.000002319 |
| 1  | -0.000002211 | -0.000000744 | 0.000002177  |
| 6  | 0.000000146  | 0.000000013  | 0.000000061  |
| 1  | -0.000000443 | 0.000000007  | -0.000000246 |
| 1  | -0.000000539 | 0.000000198  | -0.000000013 |
| 1  | -0.000000509 | 0.000000129  | -0.000000133 |
| 6  | -0.000000135 | 0.000000474  | -0.000000316 |
| 1  | 0.000000208  | -0.000000059 | 0.000000842  |
| 1  | -0.000000447 | -0.000000031 | -0.000000158 |
| 1  | -0.000000177 | -0.000000039 | -0.000000022 |
| 6  | -0.000000029 | 0.000000581  | -0.000000474 |
| 6  | -0.000000522 | 0.000000592  | -0.000000194 |
| 1  | 0.000000033  | 0.000000635  | 0.000000066  |
| 1  | -0.000000412 | -0.000000147 | -0.000000708 |
| 6  | 0.000000465  | -0.000000053 | 0.000000016  |
| 1  | 0.000000183  | 0.000000905  | -0.000000546 |
| 1  | -0.000000539 | 0.000000106  | 0.000000627  |
| 6  | -0.000000136 | 0.000000588  | -0.000000075 |
| 1  | -0.000000362 | 0.000000295  | 0.000000123  |
| 1  | 0.000000127  | 0.000000587  | -0.000000025 |
| 1  | -0.000000144 | 0.000000558  | -0.000000005 |
| 1  | -0.000000177 | 0.000000677  | -0.000000044 |
| 1  | -0.000000248 | 0.000000464  | -0.000000083 |
| 79 | 0.000000363  | 0.000000026  | -0.000000597 |
| 6  | 0.000000119  | -0.000000081 | 0.000000357  |
| 6  | 0.000000049  | -0.000000558 | 0.000000502  |

|   |              |              |              |
|---|--------------|--------------|--------------|
| 6 | 0.000000149  | -0.000000454 | -0.000000509 |
| 1 | 0.000000152  | -0.000000823 | 0.000000256  |
| 1 | 0.000000532  | -0.000000596 | 0.000000066  |
| 7 | 0.000000028  | -0.000000294 | -0.000000847 |
| 7 | 0.000000019  | -0.000000566 | 0.000001582  |
| 6 | 0.000000173  | -0.000000526 | 0.000000331  |
| 6 | 0.000000597  | -0.000000104 | 0.000000358  |
| 6 | 0.000000163  | -0.000000527 | -0.000000413 |
| 6 | 0.000000486  | -0.000000144 | 0.000000497  |
| 6 | 0.000000282  | -0.000000268 | -0.000000016 |
| 6 | 0.000000712  | -0.000000445 | -0.000000141 |
| 1 | 0.000000639  | -0.000000355 | 0.000000083  |
| 1 | 0.000000034  | -0.000000331 | 0.000000543  |
| 1 | 0.000000952  | 0.000000126  | 0.000000167  |
| 6 | -0.000002005 | -0.000000777 | -0.000000272 |
| 6 | 0.000000233  | -0.000000965 | -0.000000127 |
| 6 | -0.000000067 | -0.000000116 | 0.000000235  |
| 6 | -0.000000213 | -0.000000669 | -0.000000209 |
| 6 | 0.000000368  | -0.000000026 | -0.000000491 |
| 6 | -0.000000387 | -0.000000763 | -0.000000211 |
| 1 | -0.000000384 | -0.000000104 | 0.000000038  |
| 1 | -0.000000486 | -0.000000058 | -0.000000046 |
| 1 | -0.000000647 | -0.000000526 | -0.000000052 |
| 6 | -0.000000246 | -0.000000467 | 0.000000414  |
| 6 | 0.000000019  | -0.000000589 | -0.000000013 |
| 6 | -0.000000229 | -0.000000161 | -0.000000025 |
| 1 | 0.000000461  | 0.000000023  | -0.000000288 |
| 1 | -0.000000068 | -0.000000044 | -0.000000059 |
| 1 | -0.000000206 | -0.000000546 | -0.000000001 |
| 1 | -0.000000038 | -0.000000473 | -0.000000053 |
| 1 | -0.000000435 | -0.000000203 | -0.000000167 |
| 1 | -0.000000287 | 0.000000037  | -0.000000121 |
| 1 | -0.000000047 | -0.000000051 | 0.000000015  |
| 6 | -0.000000477 | -0.000000574 | 0.000000195  |
| 6 | -0.000000066 | -0.000000369 | 0.000000148  |
| 6 | -0.000000003 | -0.000001445 | 0.000000384  |
| 1 | 0.000000842  | -0.000000279 | -0.000000298 |
| 1 | -0.000000565 | -0.000000072 | -0.000000106 |
| 1 | -0.000000274 | -0.000000615 | 0.000000006  |
| 1 | -0.000000291 | -0.000000712 | -0.000000038 |
| 1 | 0.000000033  | -0.000000781 | -0.000000001 |
| 1 | -0.000000228 | -0.000001009 | -0.000000039 |
| 1 | 0.000000012  | -0.000000915 | 0.000000096  |
| 6 | 0.000000786  | 0.000000131  | -0.000000102 |

|    |              |              |              |
|----|--------------|--------------|--------------|
| 6  | 0.000000603  | 0.000000049  | 0.000000005  |
| 6  | 0.000001111  | -0.000000479 | 0.000000397  |
| 1  | -0.000000158 | -0.000000522 | 0.000000027  |
| 1  | 0.000000986  | -0.000000114 | 0.000000613  |
| 1  | 0.000000629  | 0.000000367  | -0.000000121 |
| 1  | 0.000000254  | 0.000000026  | 0.000000193  |
| 1  | 0.000000063  | -0.000000405 | 0.000000123  |
| 1  | 0.000000682  | -0.000000224 | 0.000000136  |
| 1  | 0.000000463  | -0.000000296 | 0.000000161  |
| 6  | 0.000002046  | 0.000000434  | -0.000000047 |
| 6  | 0.000000721  | -0.000000945 | -0.000000566 |
| 6  | 0.000000353  | 0.000000545  | 0.000000691  |
| 1  | 0.000000007  | -0.000001701 | -0.000000457 |
| 1  | 0.000000097  | -0.000000518 | 0.000000034  |
| 1  | 0.000000097  | -0.000000691 | 0.000000308  |
| 1  | 0.000000344  | -0.000000634 | 0.000000959  |
| 1  | 0.000000151  | -0.000001085 | -0.000000094 |
| 1  | 0.000000241  | -0.000000698 | -0.000000256 |
| 1  | 0.000000007  | -0.000000063 | 0.000000075  |
| 6  | 0.000000512  | 0.000000345  | -0.000002806 |
| 6  | -0.000000272 | 0.000001299  | -0.000000537 |
| 6  | -0.000000213 | 0.000000463  | -0.000000451 |
| 6  | -0.000000319 | 0.000001065  | 0.000000409  |
| 6  | -0.000000823 | 0.000001011  | 0.000000236  |
| 1  | -0.000000003 | 0.000000955  | -0.000000073 |
| 1  | 0.000000003  | -0.000002166 | 0.000003307  |
| 7  | -0.000001303 | -0.000001124 | 0.000000769  |
| 8  | 0.000000215  | 0.000001074  | -0.000001332 |
| 1  | -0.000000158 | 0.000000954  | -0.000000072 |
| 1  | -0.000000043 | 0.000000916  | -0.000000202 |
| 17 | -0.000000362 | 0.000000608  | -0.000000423 |

Zero-point correction=

1.156665 (Hartree/Particle)

Thermal correction to Energy=

1.231430

Thermal correction to Enthalpy=

1.232375

Thermal correction to Gibbs Free Energy=

1.034452

Sum of electronic and zero-point Energies=

-4178.428418

Sum of electronic and thermal Energies=

-4178.353652

Sum of electronic and thermal Enthalpies=

-4178.352708

Sum of electronic and thermal Free Energies=

-4178.550631

G-2b

|   |              |              |              |
|---|--------------|--------------|--------------|
| 6 | 0.00000462   | -0.000002668 | 0.000000893  |
| 6 | -0.000001016 | 0.000007686  | -0.000004621 |
| 7 | -0.000002975 | 0.000000394  | 0.000001538  |

|    |              |              |              |
|----|--------------|--------------|--------------|
| 7  | -0.000012019 | 0.000001896  | 0.000003695  |
| 16 | 0.000002485  | 0.000004033  | -0.000000956 |
| 8  | 0.000000234  | -0.000000044 | -0.000000697 |
| 8  | -0.000002308 | -0.000000339 | 0.000001272  |
| 6  | -0.000000243 | -0.000001293 | 0.000003434  |
| 6  | -0.000001325 | -0.000001467 | -0.000000878 |
| 6  | -0.000000827 | -0.000001335 | 0.000000039  |
| 6  | -0.000000008 | -0.000000547 | -0.000000008 |
| 6  | -0.000001238 | 0.000000441  | 0.000000667  |
| 6  | 0.000000723  | -0.000000451 | -0.000001338 |
| 1  | -0.000000537 | -0.000000811 | 0.000000418  |
| 1  | -0.000001101 | -0.000000938 | -0.000000186 |
| 1  | 0.000000001  | 0.000000357  | 0.000000837  |
| 1  | 0.000000975  | -0.000000355 | 0.000001909  |
| 6  | -0.000000787 | -0.000000634 | 0.000000172  |
| 1  | -0.000000739 | -0.000000558 | 0.000000488  |
| 1  | -0.000000642 | -0.000000063 | -0.000000002 |
| 1  | -0.000000277 | -0.000000223 | 0.000000129  |
| 16 | 0.000007025  | -0.000010869 | -0.000001348 |
| 8  | 0.000000401  | -0.000000284 | -0.000000832 |
| 8  | 0.000000062  | 0.000000208  | -0.000000355 |
| 6  | -0.000000692 | 0.000001558  | -0.000004568 |
| 6  | 0.000000896  | 0.000000196  | -0.000001914 |
| 6  | -0.000000036 | -0.000002152 | -0.000000598 |
| 6  | 0.000000162  | -0.000000842 | -0.000000196 |
| 1  | 0.000000479  | 0.000000125  | -0.000001735 |
| 6  | -0.000000064 | -0.000001295 | -0.000003098 |
| 1  | -0.000000364 | -0.000001158 | -0.000002645 |
| 6  | 0.000001027  | -0.000000125 | -0.000003837 |
| 1  | 0.000001023  | 0.000000038  | -0.000002691 |
| 1  | -0.000000204 | -0.000001125 | -0.000003268 |
| 6  | 0.000000643  | 0.000000136  | -0.000004031 |
| 1  | 0.000000448  | -0.000000849 | -0.000004255 |
| 1  | 0.000000963  | -0.000000261 | -0.000003543 |
| 1  | 0.000001269  | -0.000000279 | -0.000003845 |
| 6  | 0.000002778  | -0.000000054 | -0.000004784 |
| 1  | -0.000001651 | -0.000000422 | -0.000001673 |
| 6  | -0.000001174 | -0.000002446 | 0.000000014  |
| 1  | -0.000000938 | -0.000001633 | -0.000001531 |
| 1  | -0.000000863 | -0.000001343 | -0.000002219 |
| 1  | -0.000001589 | -0.000001871 | -0.000002109 |
| 6  | -0.000000687 | -0.000001157 | -0.000000202 |
| 1  | -0.000001183 | -0.000000132 | -0.000000456 |
| 1  | -0.000001441 | -0.000001479 | 0.000000486  |

|    |              |              |              |
|----|--------------|--------------|--------------|
| 1  | -0.000001301 | -0.000002103 | -0.000000046 |
| 6  | 0.00000056   | -0.000004638 | -0.000002333 |
| 6  | 0.000001542  | 0.000000528  | -0.000001178 |
| 1  | -0.000000848 | 0.000000847  | 0.000001157  |
| 1  | 0.000002634  | 0.000000395  | -0.000000724 |
| 6  | 0.000000772  | 0.000001843  | -0.000000692 |
| 1  | 0.000000027  | 0.00000067   | -0.000001771 |
| 1  | 0.000001276  | 0.000000836  | -0.00000137  |
| 6  | 0.000002039  | 0.000001539  | -0.000000779 |
| 1  | 0.000001555  | 0.000000475  | 0.000000056  |
| 1  | 0.000001298  | 0.00000118   | -0.000000182 |
| 1  | 0.000002013  | 0.00000225   | -0.000000975 |
| 1  | 0.000001335  | 0.000001138  | -0.00000197  |
| 1  | 0.000001356  | 0.000001686  | -0.000001564 |
| 79 | -0.000002508 | 0.000001322  | -0.000000061 |
| 6  | 0.000005053  | -0.00000426  | 0.000007458  |
| 6  | 0.00000139   | 0.000001823  | 0.000000809  |
| 6  | -0.00000053  | -0.000001311 | 0.000001481  |
| 1  | 0.000000866  | 0.000001532  | 0.000002311  |
| 1  | -0.000001068 | 0.000001093  | 0.000002781  |
| 7  | -0.000003545 | 0.000003511  | -0.000001384 |
| 7  | -0.000003308 | 0.000004725  | -0.000000892 |
| 6  | -0.000000353 | -0.000001456 | 0.000002495  |
| 6  | -0.000000844 | -0.000001891 | 0.000000828  |
| 6  | 0.000000964  | -0.000000201 | 0.000001434  |
| 6  | -0.000001176 | -0.000001023 | 0.0000016    |
| 6  | -0.000001914 | -0.000000996 | 0.000000854  |
| 6  | -0.000002054 | -0.000001651 | 0.000001125  |
| 1  | -0.0000015   | -0.00000143  | 0.000000557  |
| 1  | -0.000002218 | -0.000000661 | 0.000002219  |
| 1  | -0.000001914 | -0.000001376 | 0.000001378  |
| 6  | 0.000002432  | 0.000002568  | 0.000001844  |
| 6  | 0.000001597  | 0.00000007   | 0.000004871  |
| 6  | 0.00000027   | -0.000002451 | -0.000003231 |
| 6  | 0.0000004    | 0.000000826  | -0.000001149 |
| 6  | 0.000001776  | 0.00000245   | 0.000002924  |
| 6  | 0.000001279  | 0.000002983  | 0.000000482  |
| 1  | 0.000001544  | 0.000002163  | 0.000000913  |
| 1  | 0.00000173   | 0.000001804  | 0.000000417  |
| 1  | 0.000002124  | 0.000002309  | 0.000000489  |
| 6  | 0.000002309  | 0.00000082   | 0.000000621  |
| 6  | -0.000000327 | 0.000002048  | 0.000003213  |
| 6  | -0.000000512 | 0.000001511  | 0.000002047  |
| 1  | -0.000000084 | 0.000000474  | 0.000002205  |

|   |              |              |              |
|---|--------------|--------------|--------------|
| 1 | 0.00000072   | 0.000001409  | 0.000002825  |
| 1 | 0.000000779  | 0.000001484  | 0.000002702  |
| 1 | 0.000000947  | 0.000001784  | 0.000002428  |
| 1 | 0.000000382  | 0.000000315  | 0.000001017  |
| 1 | 0.000000489  | 0.000001313  | 0.000001566  |
| 1 | 0.000000579  | 0.000000688  | 0.000002173  |
| 6 | -0.000000751 | 0.000003379  | 0.000002008  |
| 6 | 0.000001615  | 0.000001074  | -0.000001517 |
| 6 | 0.000002358  | 0.000001352  | 0.000000587  |
| 1 | -0.000000152 | -0.000000012 | 0.000000269  |
| 1 | 0.000000903  | 0.000001508  | -0.000000244 |
| 1 | 0.000001344  | 0.000001119  | -0.000000422 |
| 1 | 0.000001491  | 0.000000985  | -0.000000145 |
| 1 | 0.000001322  | 0.000001244  | 0.000001094  |
| 1 | 0.00000101   | 0.000002021  | 0.000000492  |
| 1 | 0.000001238  | 0.000001397  | 0.000000586  |
| 6 | -0.000002318 | -0.000000008 | 0.000000939  |
| 6 | -0.000000701 | -0.000003082 | 0.000001368  |
| 6 | -0.00000122  | 0.000000186  | 0.000003366  |
| 1 | -0.000000066 | -0.000000473 | 0.000001246  |
| 1 | -0.000001875 | -0.000001072 | 0.000001301  |
| 1 | -0.000001378 | -0.000000177 | 0.000002022  |
| 1 | -0.000001516 | -0.000001351 | 0.000002415  |
| 1 | -0.000001175 | -0.000000765 | 0.000002615  |
| 1 | -0.000001167 | -0.000000478 | 0.000002632  |
| 1 | -0.000001167 | -0.00000005  | 0.000002957  |
| 6 | -0.000000347 | 0.000000485  | 0.000000798  |
| 6 | -0.000001238 | -0.000000815 | 0.000001749  |
| 6 | -0.000000382 | -0.000000113 | 0.000000186  |
| 1 | -0.000000177 | -0.000000537 | 0.000001192  |
| 1 | -0.000000445 | 0.000000117  | 0.000001706  |
| 1 | -0.000000138 | 0.000000353  | 0.000001248  |
| 1 | -0.000000798 | -0.000000474 | 0.000001567  |
| 1 | -0.000000736 | -0.000000797 | -0.000000092 |
| 1 | -0.000000433 | -0.000000848 | 0.000000845  |
| 1 | -0.000000348 | -0.000000089 | 0.000000214  |
| 6 | -0.000001572 | -0.000001633 | -0.000001757 |
| 6 | 0.000001984  | 0.000000226  | -0.000000875 |
| 6 | -0.000000544 | -0.000002068 | -0.000003611 |
| 6 | 0.000000142  | 0.000000079  | -0.000002388 |
| 6 | -0.000000431 | 0.000001273  | -0.000000779 |
| 1 | 0.000000619  | -0.000000003 | -0.000002394 |
| 1 | -0.00000199  | 0.000000104  | -0.000002301 |
| 7 | 0.00000308   | -0.000000189 | 0.000000528  |

|                                                     |                     |                     |                                    |
|-----------------------------------------------------|---------------------|---------------------|------------------------------------|
| <b>8</b>                                            | <b>-0.000003092</b> | <b>-0.000002795</b> | <b>-0.000003419</b>                |
| <b>1</b>                                            | <b>0.000001279</b>  | <b>-0.000000241</b> | <b>-0.000002749</b>                |
| <b>1</b>                                            | <b>-0.000000056</b> | <b>-0.000000477</b> | <b>-0.000001329</b>                |
| <b>17</b>                                           | <b>0.000000826</b>  | <b>-0.000000357</b> | <b>-0.000002799</b>                |
| <b>Zero-point correction=</b>                       |                     |                     | <b>1.158658 (Hartree/Particle)</b> |
| <b>Thermal correction to Energy=</b>                |                     |                     | <b>1.233139</b>                    |
| <b>Thermal correction to Enthalpy=</b>              |                     |                     | <b>1.234083</b>                    |
| <b>Thermal correction to Gibbs Free Energy=</b>     |                     |                     | <b>1.038545</b>                    |
| <b>Sum of electronic and zero-point Energies=</b>   |                     |                     | <b>-4178.434486</b>                |
| <b>Sum of electronic and thermal Energies=</b>      |                     |                     | <b>-4178.360005</b>                |
| <b>Sum of electronic and thermal Enthalpies=</b>    |                     |                     | <b>-4178.359061</b>                |
| <b>Sum of electronic and thermal Free Energies=</b> |                     |                     | <b>-4178.554599</b>                |
